# Supplementary material for: Understanding divergent substrate stereoselectivity in the isothiourea-catalysed conjugate addition of cyclic α-substituted β-ketoesters to α,β-unsaturated aryl esters
Source: Royal Society of Chemistry journal article supplement (doi:10.1039/d3sc05470e), 2023-01-01
Supplement: d3sc05470e1.pdf [file d3sc05470e1.pdf]

## Supporting Information

### Understanding Divergent Substrate Stereoselectivity in the Enantioselective Isothiourea-Catalysed Conjugate Addition of Carbo- and Heterocyclic $\alpha$ -substituted $\beta$ -ketoesters to $\alpha,\beta$ -unsaturated Aryl Esters

Ding Yuan,<sup>a,b</sup> Alister S. Goodfellow,<sup>a</sup> Tengfei Kang,<sup>a</sup> Kevin Kasten,<sup>a</sup> Zhuan Duan,<sup>a</sup> David B. Cordes,<sup>a</sup> Michael Bühl,<sup>a\*</sup> Aidan. P. McKay,<sup>a</sup> Gregory R. Boyce<sup>a,c,d\*</sup> and Andrew D. Smith<sup>a\*</sup>

<sup>a</sup> EaStCHEM, School of Chemistry, University of St Andrews, St Andrews, Fife,

KY16 9ST, UK. E-mail: [ads10@st-andrews.ac.uk](mailto:ads10@st-andrews.ac.uk)

<sup>b</sup> School of Biological and Chemical Engineering, Panzhihua University, Panzhihua 617000, China

<sup>c</sup> Department of Chemistry and Physics, Florida Gulf Coast University, Fort Myers, Florida 33965, United States

<sup>d</sup> Department of Chemistry and Biochemistry, East Stroudsburg University, East Stroudsburg, Pennsylvania 18301, United States. E-mail:

[gboyce@esu.edu](mailto:gboyce@esu.edu)

## Contents

|                                                                                                                                                                     |    |
|---------------------------------------------------------------------------------------------------------------------------------------------------------------------|----|
| General Information .....                                                                                                                                           | 3  |
| General Procedures .....                                                                                                                                            | 4  |
| Optimisation .....                                                                                                                                                  | 5  |
| Synthesis Procedures .....                                                                                                                                          | 6  |
| Synthesis of $\alpha$ , $\beta$ -Unsaturated Aryl Esters .....                                                                                                      | 6  |
| 4-Nitrophenyl ( <i>E</i> )-4,4,4-trifluorobut-2-enoate (8) .....                                                                                                    | 6  |
| Ethyl (4-nitrophenyl) maleate (24) .....                                                                                                                            | 7  |
| Ethyl (4-nitrophenyl) fumarate (26) .....                                                                                                                           | 8  |
| 4-Nitrophenyl ( <i>E</i> )-4-chloro-4,4-difluorobut-2-enoate (S1) .....                                                                                             | 9  |
| 4-Nitrophenyl ( <i>E</i> )-4-bromo-4,4-difluorobut-2-enoate (S2) .....                                                                                              | 11 |
| 4-Nitrophenyl ( <i>E</i> )-4,4,5,5,5-pentafluoropent-2-enoate (S3) .....                                                                                            | 12 |
| 4-Nitrophenyl ( <i>E</i> )-4,4-difluorobut-2-enoate (S4) .....                                                                                                      | 14 |
| Synthesis of $\beta$ -Ketoesters .....                                                                                                                              | 15 |
| Methyl 1-acetyl-3-oxoindoline-2-carboxylate (18) .....                                                                                                              | 15 |
| Ethyl 1-oxo-2,3-dihydro-1 <i>H</i> -indene-2-carboxylate (S5) .....                                                                                                 | 16 |
| Ethyl 3-oxo-2,3-dihydrobenzofuran-2-carboxylate (S6) .....                                                                                                          | 17 |
| Synthesis of the Michael Addition Products .....                                                                                                                    | 19 |
| Ethyl ( <i>S</i> )-1-(( <i>S</i> )-4'-(benzylamino)-1',1',1'-trifluoro-4'-oxobutan-2'-yl)-2-oxocyclopentane-1-carboxylate (1 <i>S</i> ,2' <i>S</i> )-9 .....        | 19 |
| Ethyl ( <i>S</i> )-1-(( <i>S</i> )-4'-(benzylamino)-1'-chloro-1',1'-difluoro-4'-oxobutan-2'-yl)-2-oxocyclopentane-1-carboxylate (1 <i>S</i> ,2' <i>S</i> )-10 ..... | 24 |
| Ethyl ( <i>S</i> )-1-(( <i>S</i> )-4'-(benzylamino)-1'-bromo-1',1'-difluoro-4'-oxobutan-2'-yl)-2-oxocyclopentane-1-carboxylate (1 <i>S</i> ,2' <i>S</i> )-11 .....  | 28 |
| Ethyl ( <i>S</i> )-1-(( <i>S</i> )-5-(benzylamino)-1,1,1,2,2-pentafluoro-5-oxopentan-3-yl)-2-oxocyclopentane-1-carboxylate (1 <i>S</i> ,2' <i>S</i> )-12 .....      | 32 |

|                                                                                                                                                        |     |
|--------------------------------------------------------------------------------------------------------------------------------------------------------|-----|
| Ethyl (S)-1-((S)-4'-(benzylamino)-1'-ethoxy-1,4'-dioxobutan-2'-yl)-2-oxocyclopentane -1-carboxylate (1S,2'S)-13 .....                                  | 36  |
| 1-( <i>tert</i> -Butyl) 2-ethyl (S)-2-((S)-4'-(benzylamino)-1',1',1'-trifluoro-4'-oxobutan-2'-yl)-3-oxopyrrolidine-1,2-dicarboxylate (2R,2'S)-14 ..... | 43  |
| 1-( <i>tert</i> -butyl) 3-ethyl (R)-3-((S)-4'-(benzylamino)-1',1',1'-trifluoro-4'-oxobutan-2'-yl)-4-oxopyrrolidine-1,3-dicarboxylate (3R,2'S)-15 ..... | 48  |
| Ethyl (S)-2-((S)-4'-(benzylamino)-1',1',1'-trifluoro-4'-oxobutan-2'-yl)-1-oxo-2,3-dihydro-1 <i>H</i> -indene-2-carboxylate (2S,2'S)-16 .....           | 52  |
| Ethyl (S)-2-((S)-4'-(benzylamino)-1',1',1'-trifluoro-4'-oxobutan-2'-yl)-3-oxo-2,3-dihydrobenzofuran-2-carboxylate (2S,2'S)-17 .....                    | 59  |
| Methyl (S)-1-acetyl-2-((S)-4'-(benzylamino)-1',1',1'-trifluoro-4'-oxobutan-2'-yl)-3-oxoindoline-2-carboxylate (2S,2'S)-19 .....                        | 63  |
| Methyl (S)-1-acetyl-2-((S)-4-(benzylamino)-1-chloro-1,1-difluoro-4-oxobutan-2-yl)-3-oxoindoline-2-carboxylate (2S,2'S)-20 .....                        | 68  |
| Methyl (S)-1-acetyl-2-((S)-4'-(benzylamino)-1'-bromo-1',1'-difluoro-4'-oxobutan-2'-yl)-3-oxoindoline-2-carboxylate (2S,2'S)-21 .....                   | 73  |
| Methyl (S)-1-acetyl-2-((S)-4-(benzylamino)-1,1,1,2,2-pentafluoro-5-oxopentan-3-yl)-3-oxoindoline-2-carboxylate (2S,2'S)-22 .....                       | 76  |
| Methyl (S)-1-acetyl-2-((S)-4-(benzylamino)-1-ethoxy-1,4-dioxobutan-2-yl)-3-oxoindoline-2-carboxylate (2S,2'S)-23 .....                                 | 80  |
| Ethyl (S)-1-((S)-4'-(benzylamino)-1',1'-difluoro-4'-oxobutan-2'-yl)-2-oxocyclopentane-carboxylate (2S,2'S)-S7 and <i>rel</i> -(2S,2'R)-S7.....         | 86  |
| Determination of Product Configuration by X-Ray Crystallography .....                                                                                  | 100 |
| Computational Details .....                                                                                                                            | 108 |
| Conformational Flexibility (PCM//PCM) .....                                                                                                            | 109 |
| Conformational Flexibility (SMD//SMD) .....                                                                                                            | 110 |
| Visualisation of non-covalent interactions (SMD//SMD) .....                                                                                            | 111 |
| Comparison of solvent models .....                                                                                                                     | 112 |
| Computational Data .....                                                                                                                               | 116 |
| References .....                                                                                                                                       | 476 |

## General Information

Reactions involving moisture sensitive reagents were carried out in flame-dried glassware under an argon or nitrogen atmosphere using standard vacuum line techniques and using anhydrous solvents. Anhydrous solvents (CH<sub>2</sub>Cl<sub>2</sub> and toluene) were obtained from an anhydrous solvent system (purified using an alumina column, Mbraun SPS-800). All other reactions were performed in standard glassware with no precautions to exclude air or moisture. Solvents and commercial reagents were used as supplied without further purification unless otherwise stated. (2*S*,3*R*)-HyperBTM **1** was prepared from a literature procedure.<sup>1</sup> Pyrrolidine dicarboxylates and β-ketoester **7** were purchased from fluorochem and used without further purification. All diastereomeric ratios were determined by <sup>1</sup>H NMR analysis of the purified reaction mixtures after column chromatography.

Room temperature (rt.) refers to 20–25 °C. Temperatures of 0 °C and –78 °C were obtained using ice/water and CO<sub>2</sub>(s)/acetone baths, respectively. Reflux conditions were obtained using a DrySyn, oil bath, or sand bath equipped with a contact thermometer.

Analytical thin layer chromatography was performed on pre-coated aluminium plates (Kieselgel 60 F<sub>254</sub> silica).<sup>2</sup> TLC visualisation was carried out with ultraviolet light (254 nm), followed by staining with a 1% aqueous KMnO<sub>4</sub> solution. Manual column chromatography was performed in glass columns fitted with porosity 3 sintered discs over Kieselgel 60 silica using the solvent system stated.<sup>3</sup> Automated chromatography was performed on a Biotage<sup>®</sup> Selekt™ SEL-2SV running Selekt 1.4.2-13403 software on OS 6.1-i386-182-6 with a 200 – 400 nm UV-detector using the method stated and cartridges filled with Kieselgel 60 silica.

**Melting points** were recorded on an Electrothermal 9100 melting point apparatus and are uncorrected.

**Optical rotations** [ $\alpha$ ]<sub>D</sub><sup>20</sup> were measured on a PerkinElmer Model 341 polarimeter operating at the sodium D line with a 100 mm path cell at 20 °C.

**HPLC** analyses were obtained using either a Shimadzu HPLC consisting of a DGU-20A5 degassing unit, LC-20AT liquid chromatography pump, SIL-20AHT autosampler, CMB-20A communications bus module, SPD-M20A diode array detector and a CTO-20A column oven; or a Shimadzu HPLC consisting of a DGU-20A5R degassing unit, LC-20AD liquid chromatography pump, SIL-20AHT autosampler, SPD-20A UV/Vis detector and a CTO-20A column oven. Separation was achieved using DAICEL CHIRALCEL OD-H or DAICEL CHIRALPAK AD-H or AS-H columns. All HPLC traces of enantiomerically-enriched compounds were compared with authentic racemic spectra.

**<sup>1</sup>H, <sup>13</sup>C, <sup>19</sup>F nuclear magnetic resonance (NMR) spectra** were acquired on either a Bruker Avance 300, Bruker Avance II 400 or a Bruker Avance II 500 spectrometer at ambient temperature in the deuterated solvent stated. All chemical shifts are quoted in parts per million (ppm) and referenced to residual solvent peak reported in the literature.<sup>4-7</sup> All coupling constants, *J*, are quoted in Hz.

Multiplicities are indicated by s (singlet), d (doublet), t (triplet), q (quartet), and combinations thereof, and m (multiplet). The abbreviation Ar is used to denote aromatic, Ph to denote phenyl, Bn to denote benzyl, br to denote broad and app to denote apparent.<sup>8-10</sup>

**Infrared spectra** ( $\nu_{\max}$ ) were recorded on a Shimadzu IRAffinity-1 Fourier transform IR spectrophotometer fitted with a Specac Quest ATR accessory (diamond puck). Spectra were recorded of either thin films or solids, with characteristic absorption wave numbers (max) reported in  $\text{cm}^{-1}$ .

**High Resolution Mass spectrometry (HRMS)** data were acquired by electrospray ionization time-of-flight (ESI-TOF) on a Micromass GCT at the University of St Andrews with values reported in Daltons [Da].<sup>11, 12</sup>

Common chemical abbreviations were used to indicate chemical groups or environments such as Ph (phenyl), Ar (aromatic, not confuse with Argon), Bn (benzyl), Et (ethyl), Me (methyl). To indicate atoms numbering schemes are displayed with the spectrum and deviate from IUPAC numbering for clarity. For names and numbering concerning stereodiscriptors IUPAC nomenclature was applied.<sup>13-49</sup>

## General Procedures

### General Procedure 1: Synthesis of $\alpha,\beta$ -unsaturated PNP esters

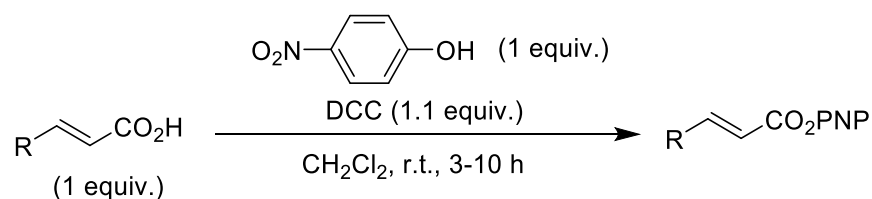

To a solution of corresponding  $\alpha,\beta$ -unsaturated carboxylic acid (1.0 equiv.) in anhydrous  $\text{CH}_2\text{Cl}_2$  (0.1 M) was added *N,N'*-dicyclohexylcarbodiimide (1.1 equiv.) at room temperature and stirred for 0.5 h. 4-Nitrophenol (1.0 equiv.) was added and the mixture was stirred until the reaction was complete. The reaction was then filtered, and the solvent was removed under reduced pressure. The residue was purified by column chromatography to afford the title compound.

### General Procedure 2: Asymmetric Michael addition of $\beta$ -ketoester to $\alpha,\beta$ -unsaturated aryl esters

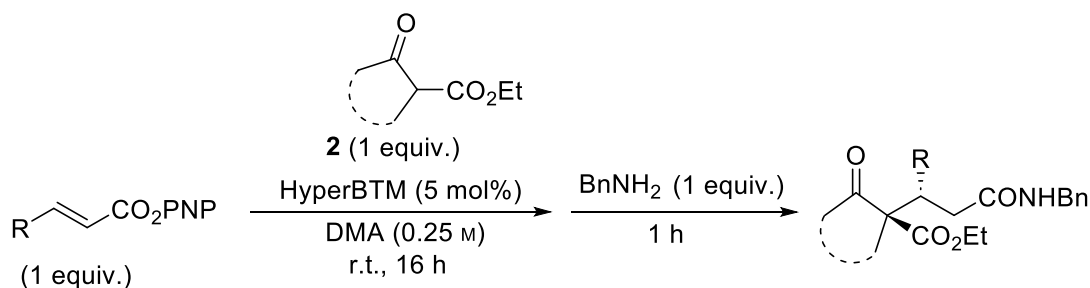

A mixture of  $\alpha,\beta$ -unsaturated ester (1.0 equiv.),  $\beta$ -ketoester (1.0 equiv.), and (2*S*,3*R*)-HyperBTM **1** (5 mol%) in DMA (0.1 M) was stirred for 16 h at room temperature. Benzylamine (1.0 equiv.) was added,



and the reaction was permitted to stir for 1 h. The solution was diluted with Et<sub>2</sub>O or CH<sub>2</sub>Cl<sub>2</sub>, washed sequentially with saturated aqueous Na<sub>2</sub>CO<sub>3</sub> (3×), brine, dried over MgSO<sub>4</sub>, filtered, and concentrated under reduced pressure. The residue was purified by column chromatography to afford the title compound.

## Optimisation

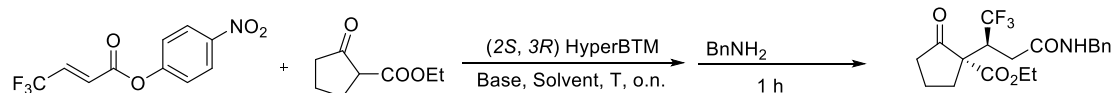

| entry | solvent<br>(0.25<br>M) | base                 | T    | catalyst (mol<br>%) | nucleophile<br>equivalence | conversion(%) <sup>a</sup> |
|-------|------------------------|----------------------|------|---------------------|----------------------------|----------------------------|
| 1     | DCM                    | -                    | rt   | 20                  | 1.5                        | 0                          |
| 2     | DCM                    | -                    | 0 °C | 20                  | 1.5                        | 0                          |
| 3     | DCM                    | 10% Hünig's          | rt   | 20                  | 1.5                        | 0                          |
| 4     | MeCN                   | 10% Hünig's          | rt   | 20                  | 1.5                        | 0                          |
| 5     | EtOAc                  | -                    | rt   | 20                  | 1.5                        | 0                          |
| 6     | EtOAc                  | 10% Hünig's          | rt   | 20                  | 1.5                        | 0                          |
| 7     | EtOAc                  | 10% NEt <sub>3</sub> | rt   | 20                  | 1.5                        | 0                          |
| 8     | EtOAc                  | 10% DBU              | rt   | 20                  | 1.5                        | 0                          |
| 9     | DMA                    | -                    | rt   | 20                  | 1.5                        | 70                         |
| 10    | DMF                    | -                    | rt   | 20                  | 1.5                        | 67                         |
| 11    | NMP                    | -                    | rt   | 20                  | 1.5                        | 41                         |
| 12    | DMA                    | -                    | rt   | 20                  | 1.5                        | 63                         |
| 13    | DMA                    | -                    | rt   | 20                  | 1                          | 66                         |
| 14    | DMA                    | -                    | rt   | 20                  | 1.2                        | 68                         |
| 15    | DMA                    | -                    | rt   | 20                  | 2                          | 70                         |
| 16    | DMA                    | -                    | rt   | 20                  | 3                          | 60                         |
| 17    | DMA                    | -                    | rt   | 10                  | 1                          | 66                         |
| 18    | DMA                    | -                    | rt   | 5                   | 1                          | 61                         |
| 19    | DMA                    | -                    | rt   | 2.5                 | 1                          | 55                         |
| 20    | DMA                    | -                    | rt   | 1                   | 1                          | 41                         |

<sup>a</sup>Conversion was determined by F NMR.

## Synthesis Procedures

### Synthesis of $\alpha$ , $\beta$ -Unsaturated Aryl Esters

#### 4-Nitrophenyl (*E*)-4,4,4-trifluorobut-2-enoate (8)

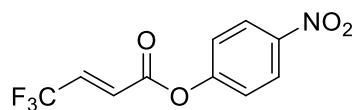

The title compound was prepared according to **General Procedure 1**, (*E*)-4,4,4-trifluorobut-2-enoic acid (140 mg, 1.0 mmol) in anhydrous  $\text{CH}_2\text{Cl}_2$  (0.1 M) was added *N,N'*-dicyclohexylcarbodiimide (226.6 mg, 1.1 mmol) at room temperature and stirred for 0.5 h. 4-Nitrophenol (139 mg, 1.0 mmol) was added and the mixture was stirred for 8 h. The reaction was then filtered, and the solvent was removed under reduced pressure. The residue was purified by column chromatography (2:1 Hexane:EtOAc) to give the title compound (161.9 mg, 62%) as a white solid. **mp** 88–90 °C (lit.<sup>50</sup> 86–88 °C); **IR**  $\nu_{\text{max}}$  (film) /  $\text{cm}^{-1}$  3123, 3094, 2934, 1937, 1738, 1618, 1526, 1487, 1306, 1128, 972, 869;  **$^1\text{H}$  NMR** (400 MHz,  $\text{CDCl}_3$ )  $\delta_{\text{H}}$ : 6.74 (1H, dq,  $J$  15.7, 1.9,  $\text{F}_3\text{CCH}=\text{CH}$ ), 7.02 (1H, dq,  $J$  15.8, 6.3,  $\text{F}_3\text{CCH}=\text{CH}$ ), 7.34–7.38 (2H, m,  $\text{ArC}^{2,6}\text{H}$ ), 8.30–8.34 (2H, m,  $\text{ArC}^{3,5}\text{H}$ );  **$^{19}\text{F}\{^1\text{H}\}$  NMR** (376 MHz,  $\text{CDCl}_3$ )  $\delta_{\text{F}}$ : –65.37 ( $\text{CF}_3$ ). Data in accordance with literature.<sup>50</sup>

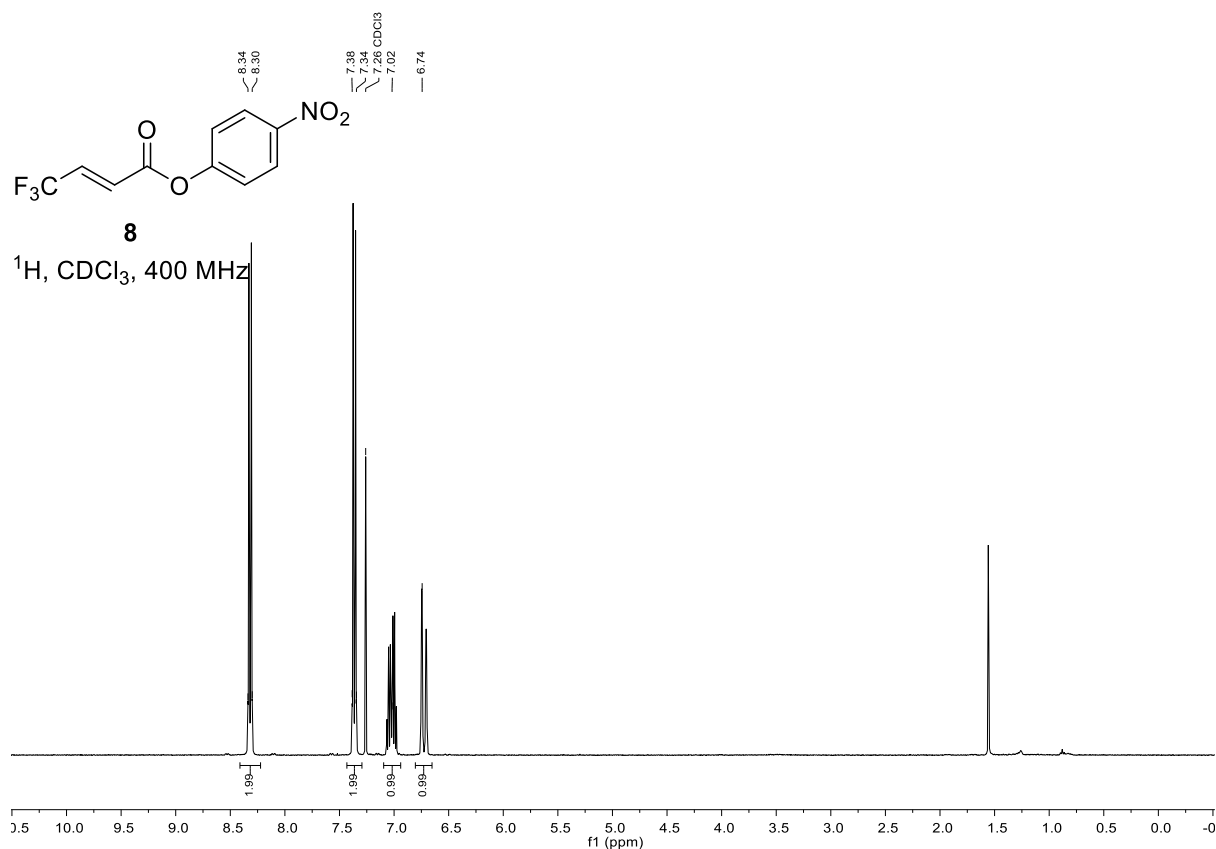

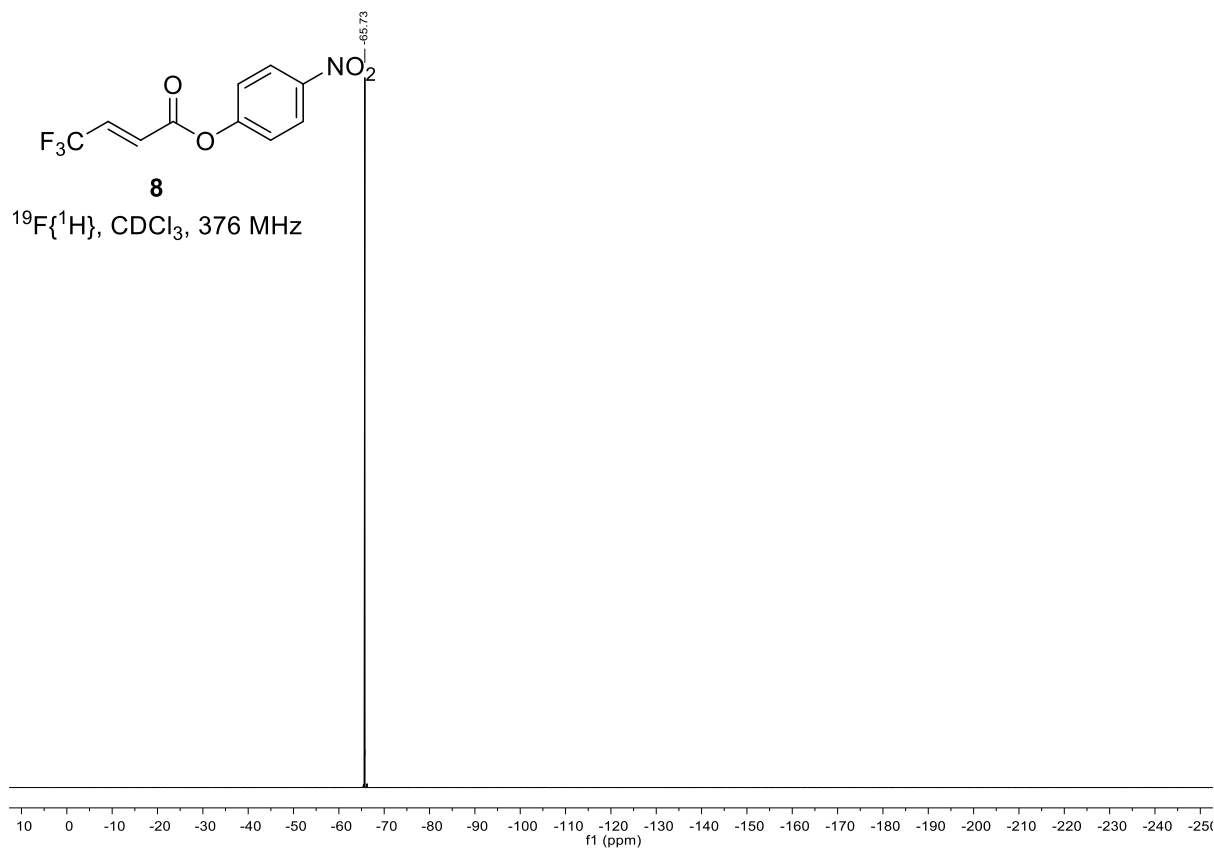

#### Ethyl (4-nitrophenyl) maleate (24)

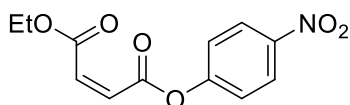

The title compound was prepared according to **General Procedure 1**, (*Z*)-4-ethoxy-4-oxobut-2-enoic acid (144 mg, 1.0 mmol) in anhydrous  $\text{CH}_2\text{Cl}_2$  (0.1 M) was added *N,N'*-dicyclohexylcarbodiimide (226.6 mg, 1.1 mmol) at room temperature and stirred for 0.5 h. 4-Nitrophenol (139 mg, 1.0 mmol) was added and the mixture was stirred for 2 h. The reaction was then filtered, and the solvent was removed under reduced pressure. The residue was purified by column chromatography (2:1 Hexane:EtOAc) to give the title compound (191.9 mg, 73%) as a white solid. **mp** 58–60 °C (lit.<sup>51</sup> 59–61 °C); **IR**  $\nu_{\text{max}}$  (film) /  $\text{cm}^{-1}$  3121, 2988, 1732, 1531, 1396, 1348, 1211, 1152, 1013, 866, 841;  **$^1\text{H}$  NMR** (400 MHz,  $\text{CDCl}_3$ )  $\delta_{\text{H}}$ : 1.30 (3H, t, *J* 7.1,  $\text{CH}_3$ ), 4.26 (2H, q, *J* 7.1,  $\text{CH}_2$ ), 6.43 (1H, d, *J* 11.8,  $\text{CH}=\text{CH}$ ), 6.48 (1H, d, *J* 11.8,  $\text{CH}=\text{CH}$ ), 7.38–7.42 (2H, m,  $\text{ArC}^{2,6}\text{H}$ ), 8.26–8.30 (2H, m,  $\text{ArC}^{3,5}\text{H}$ ). Data in accordance with literature.<sup>51</sup>

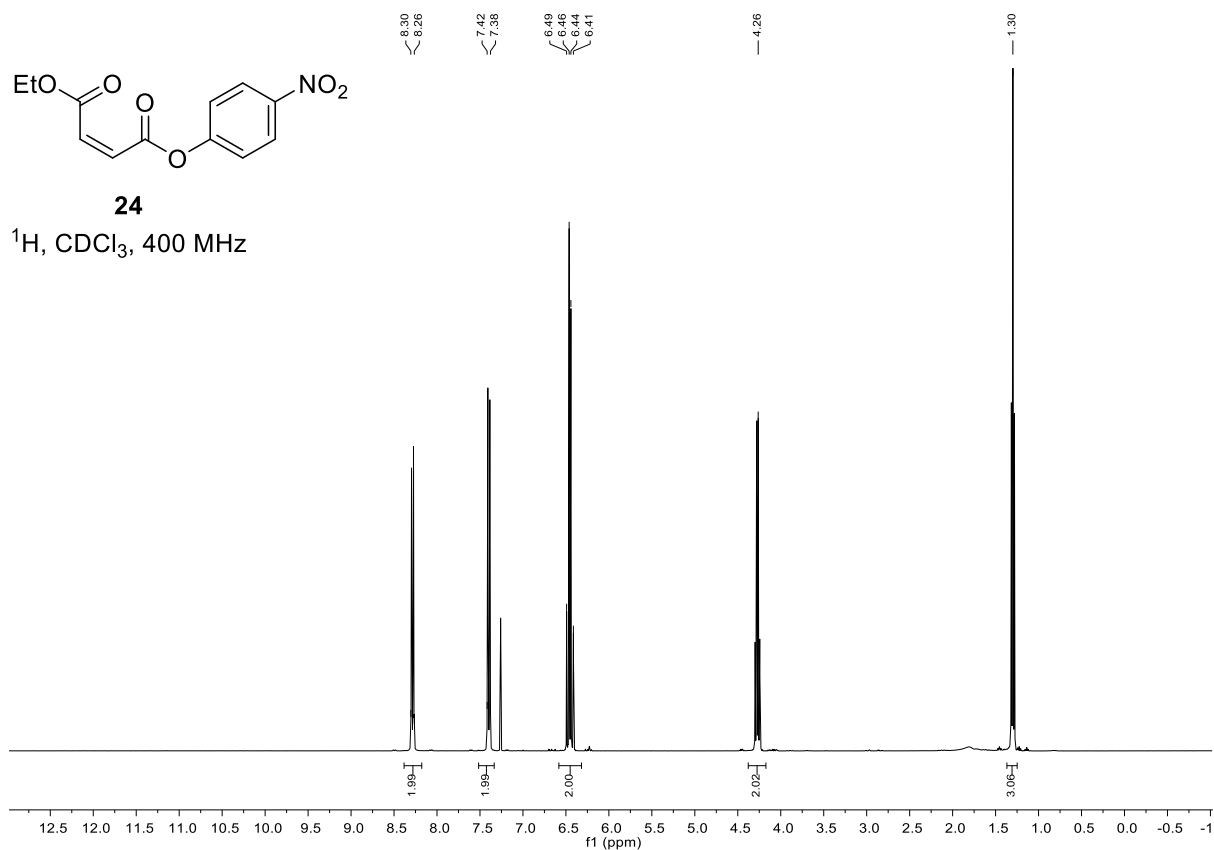

#### Ethyl (4-nitrophenyl) fumarate (26)

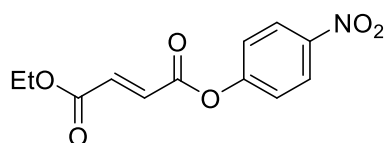

The title compound was prepared according to **General Procedure 1**, (*E*)-4-ethoxy-4-oxobut-2-enoic acid (144 mg, 1.0 mmol) in anhydrous  $\text{CH}_2\text{Cl}_2$  (0.1 M) was added *N,N'*-dicyclohexylcarbodiimide (226.6 mg, 1.1 mmol) at r.t. and stirred for 0.5 h. 4-Nitrophenol (139 mg, 1.0 mmol) was added and the mixture was stirred for 2 h. The reaction was then filtered, and the solvent was removed under reduced pressure. The residue was purified by column chromatography (2:1 Hexane:EtOAc) to give the title compound (201.4 mg, 76%) as a white solid. **mp** 68–70 °C (lit.<sup>50</sup> 67–68 °C); **IR**  $\nu_{\text{max}}$  (film) /  $\text{cm}^{-1}$  3115, 3073, 2997, 2909, 1717, 1593, 1512, 1489, 1350, 1211, 991, 935, 874;  **$^1\text{H}$  NMR** (400 MHz,  $\text{CDCl}_3$ )  $\delta_{\text{H}}$ : 1.35 (3H, t,  $J$  7.1,  $\text{CH}_3$ ), 4.21 (2H, q,  $J$  7.1,  $\text{CH}_2$ ), 7.06 (1H, d,  $J$  15.7,  $\text{CH}=\text{CH}$ ), 7.07 (1H, d,  $J$  15.7,  $\text{CH}=\text{CH}$ ), 7.34–7.38 (2H, m,  $\text{ArC}^{2,6}\text{H}$ ), 8.29–8.32 (2H, m,  $\text{ArC}^{3,5}\text{H}$ ). Data in accordance with literature.<sup>50</sup>

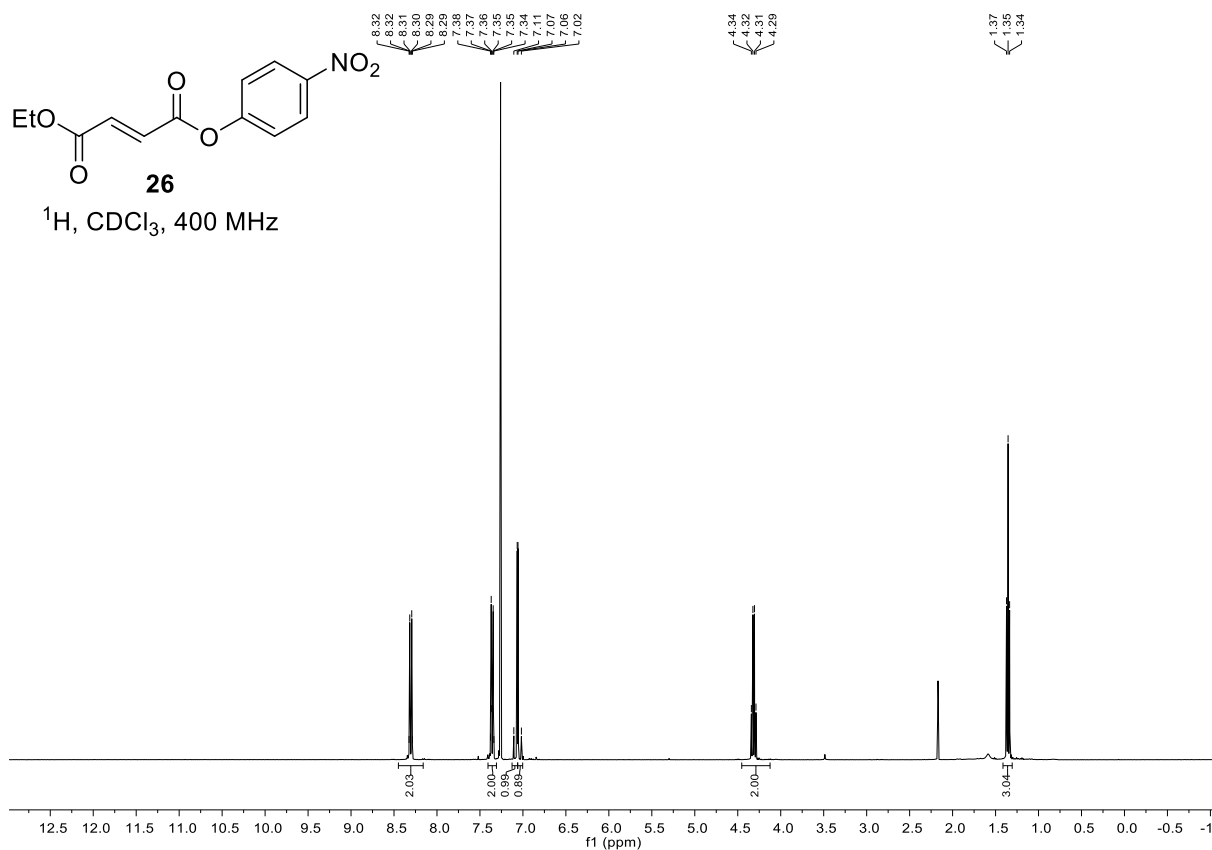

#### 4-Nitrophenyl (*E*)-4-chloro-4,4-difluorobut-2-enoate (S1)

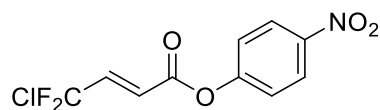

The title compound was prepared according to **General Procedure 1**, (*E*)-4-chloro-4,4-difluorobut-2-enoic acid (156 mg, 1.0 mmol) in anhydrous  $\text{CH}_2\text{Cl}_2$  (0.1 M) was added *N,N'*-dicyclohexylcarbodiimide (226.6 mg, 1.1 mmol) at room temperature and stirred for 0.5 h. 4-Nitrophenol (139mg, 1.0 mmol) were added and the mixture was stirred for 3 h. The reaction was then filtered, and the solvent was removed under reduced pressure. The residue was purified by column chromatography (2:1 Hexane:EtOAc) to give the title compound (141.3 mg, 51%) as a white solid. **mp** 73–76 °C (lit.<sup>50</sup> 74–76 °C); **IR**  $\nu_{\text{max}}$  (film) /  $\text{cm}^{-1}$  3119, 3084, 1740, 1524, 1350, 1314, 1277, 1202, 1155, 1103, 949, 860, 816;  **$^1\text{H}$  NMR** (400 MHz,  $\text{CDCl}_3$ )  $\delta_{\text{H}}$ : 6.62 (1H, dt,  $J$  15.6, 1.8,  $\text{ClF}_2\text{CCH}=\text{CH}$ ), 7.16 (1H, dt,  $J$  15.5, 9.0,  $\text{ClF}_2\text{CCH}=\text{CH}$ ), 7.34–7.38 (2H, m,  $\text{ArC}^{2,6}\text{H}$ ), 8.30–8.34 (2H, m,  $\text{ArC}^{3,5}\text{H}$ );  **$^{19}\text{F}\{^1\text{H}\}$  NMR** (376 MHz,  $\text{CDCl}_3$ )  $\delta_{\text{F}}$ : –54.47 ( $\text{CF}_2\text{Cl}$ ). Data in accordance with literature.<sup>50</sup>

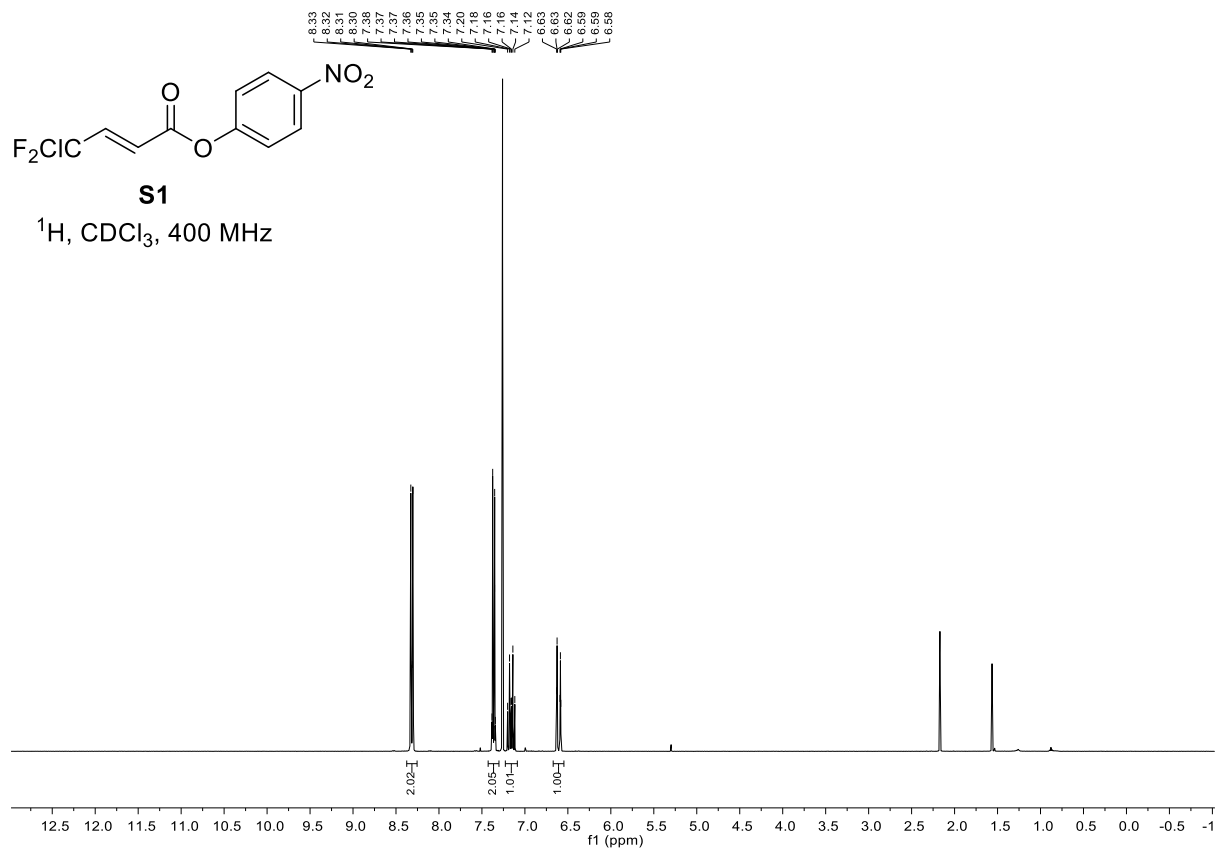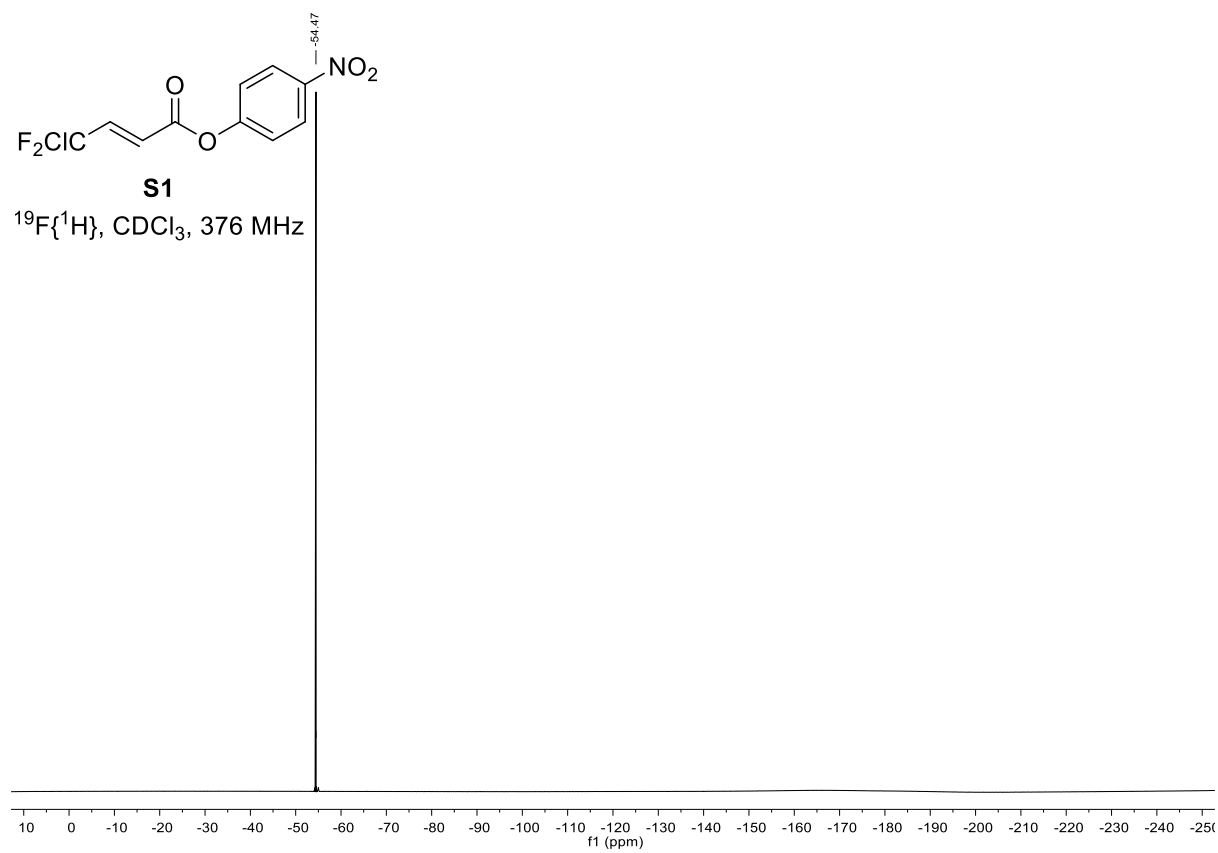

4-Nitrophenyl (*E*)-4-bromo-4,4-difluorobut-2-enoate (S2)

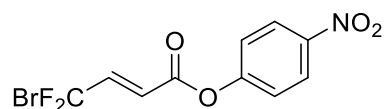

The title compound was prepared according to **General Procedure 1**, (*E*)-4-bromo-4,4-difluorobut-2-enoic acid (200 mg, 1.0 mmol) in anhydrous  $\text{CH}_2\text{Cl}_2$  (0.1 M) was added *N,N'*-dicyclohexylcarbodiimide (226.6 mg, 1.1 mmol) at room temperature and stirred for 0.5 h. 4-Nitrophenol (139 mg, 1 mmol) were added and the mixture was stirred for 3 h. The reaction was then filtered, and the solvent was removed under reduced pressure. The residue was purified by column chromatography (2:1 Hexane:EtOAc) to give the title compound (183.5 mg, 57%) as a white solid. **mp** 77–79 °C (lit.<sup>50</sup> 79–80 °C); **IR**  $\nu_{\text{max}}$  (film) /  $\text{cm}^{-1}$  3080, 1740, 1593, 1524, 1487, 1348, 1312, 1279, 1204, 1161, 1105, 972, 932, 858, 793;  **$^1\text{H}$  NMR** (400 MHz,  $\text{CDCl}_3$ )  $\delta_{\text{H}}$ : 6.51 (1H, dt, *J* 15.5, 1.7,  $\text{BrF}_2\text{CCH}=\text{CH}$ ), 7.21 (1H, dt, *J* 15.5, 9.8, 9.8,  $\text{BrF}_2\text{CCH}=\text{CH}$ ), 7.34–7.38 (2H, m,  $\text{ArC}^{2,6}\text{H}$ ), 8.29–8.34 (2H, m,  $\text{ArC}^{3,5}\text{H}$ );  **$^{19}\text{F}\{^1\text{H}\}$  NMR** (376 MHz,  $\text{CDCl}_3$ )  $\delta_{\text{F}}$ : –50.65 ( $\text{CF}_2\text{Br}$ ). Data in accordance with literature.<sup>50</sup>

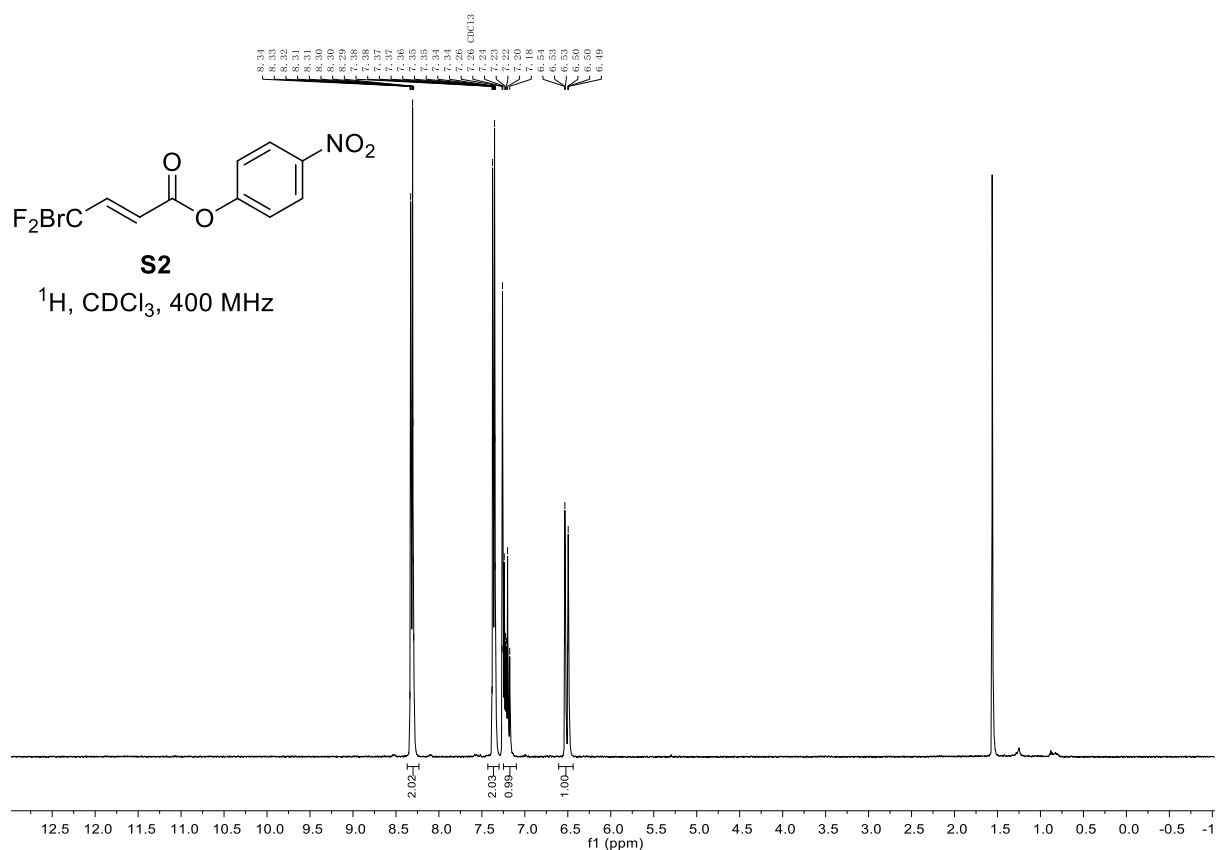

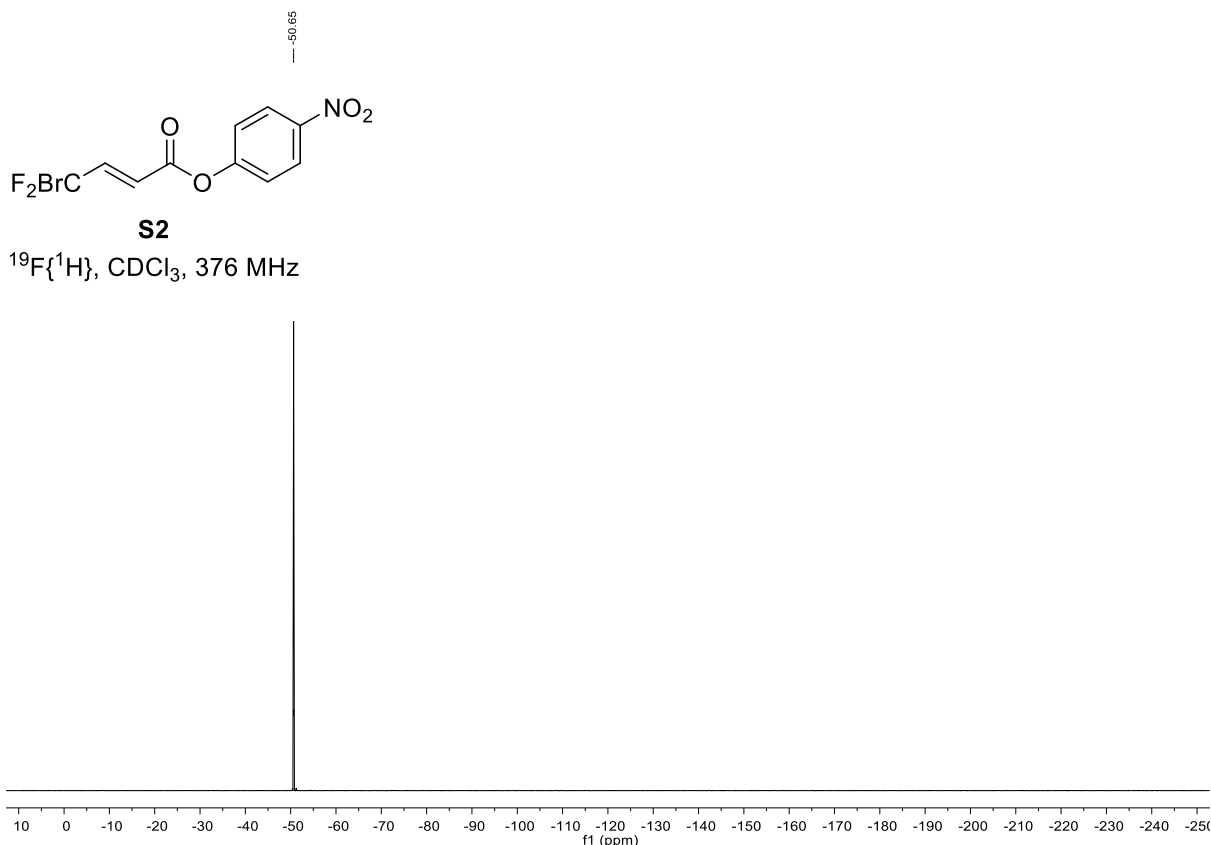

#### 4-Nitrophenyl (*E*)-4,4,5,5,5-pentafluoropent-2-enoate (S3)

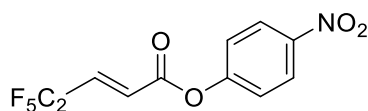

The title compound was prepared according to the literature,<sup>52</sup> (*E*)-4,4,5,5,5-pentafluoropent-2-enoic acid (190 mg, 1.0 mmol) in anhydrous  $\text{CH}_2\text{Cl}_2$  (0.33 M) was added oxalyl chloride (127 mg, 1.0 mmol) and a few drops of DMF at room temperature under a  $\text{N}_2$  atmosphere and allowed to stir for 1 h. A solution of diisopropylethylamine (258 mg, 2.0 mmol) and 4-nitrophenol (139 mg, 1.0 mmol) in anhydrous  $\text{CH}_2\text{Cl}_2$  (0.33 M) were added dropwise and the mixture was allowed to stir overnight. The solvent was removed *in vacuo* and the residue was purified by column chromatography (4:1 Petrol:EtOAc) to give the title compound (236.4 mg, 76%) as a colourless oil. **IR**  $\nu_{\text{max}}$  (film) /  $\text{cm}^{-1}$  3119, 3082, 3059, 1744, 1593, 1526, 1348, 1308, 1279, 1192, 1125, 1040, 970, 858, 823;  **$^1\text{H}$  NMR** (400 MHz,  $\text{CDCl}_3$ )  $\delta_{\text{H}}$ : 6.78 (1H, dt,  $J$  15.9, 2.1,  $\text{F}_5\text{C}_2\text{CH}=\text{CH}$ ), 7.04 (1H, dtq,  $J$  15.8, 11.5, 0.8,  $\text{F}_5\text{C}_2\text{CH}=\text{CH}$ ), 7.35-7.39 (2H, m,  $\text{ArC}^{2,6}\text{H}$ ), 8.29-8.33 (2H, m,  $\text{ArC}^{3,5}\text{H}$ );  **$^{19}\text{F}\{^1\text{H}\}$  NMR** (376 MHz,  $\text{CDCl}_3$ )  $\delta_{\text{F}}$ : -117.39 (2F, d,  $J$  2.3,  $\text{CF}_2$ ), -84.42 (3F, t,  $J$  3.2,  $\text{CF}_3$ ). Data in accordance with literature.<sup>52</sup>



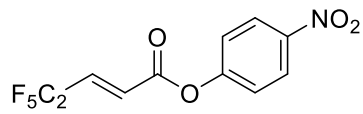

**S3**

$^1\text{H}$ ,  $\text{CDCl}_3$ , 400 MHz

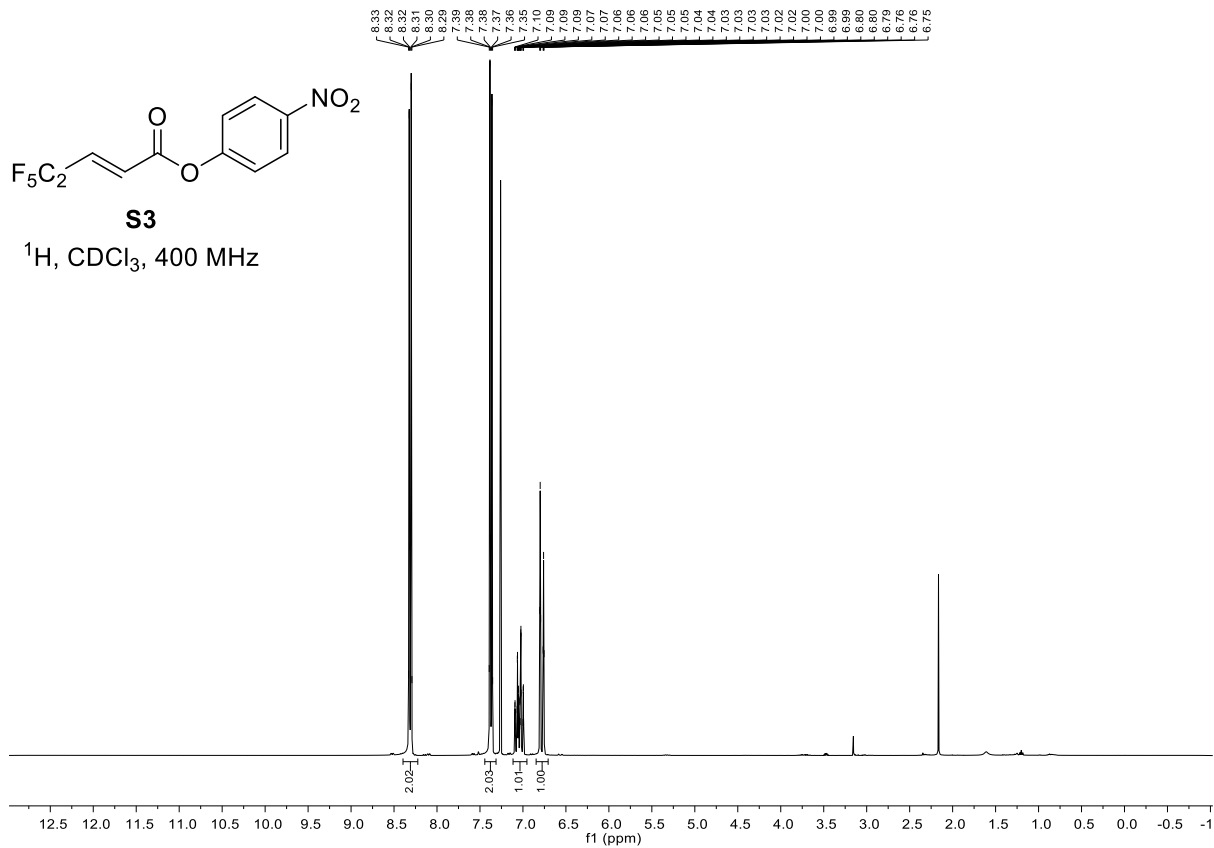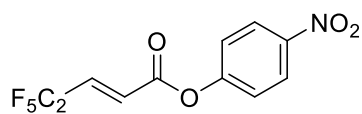

**S3**

$^{19}\text{F}\{^1\text{H}\}$ ,  $\text{CDCl}_3$ , 376 MHz

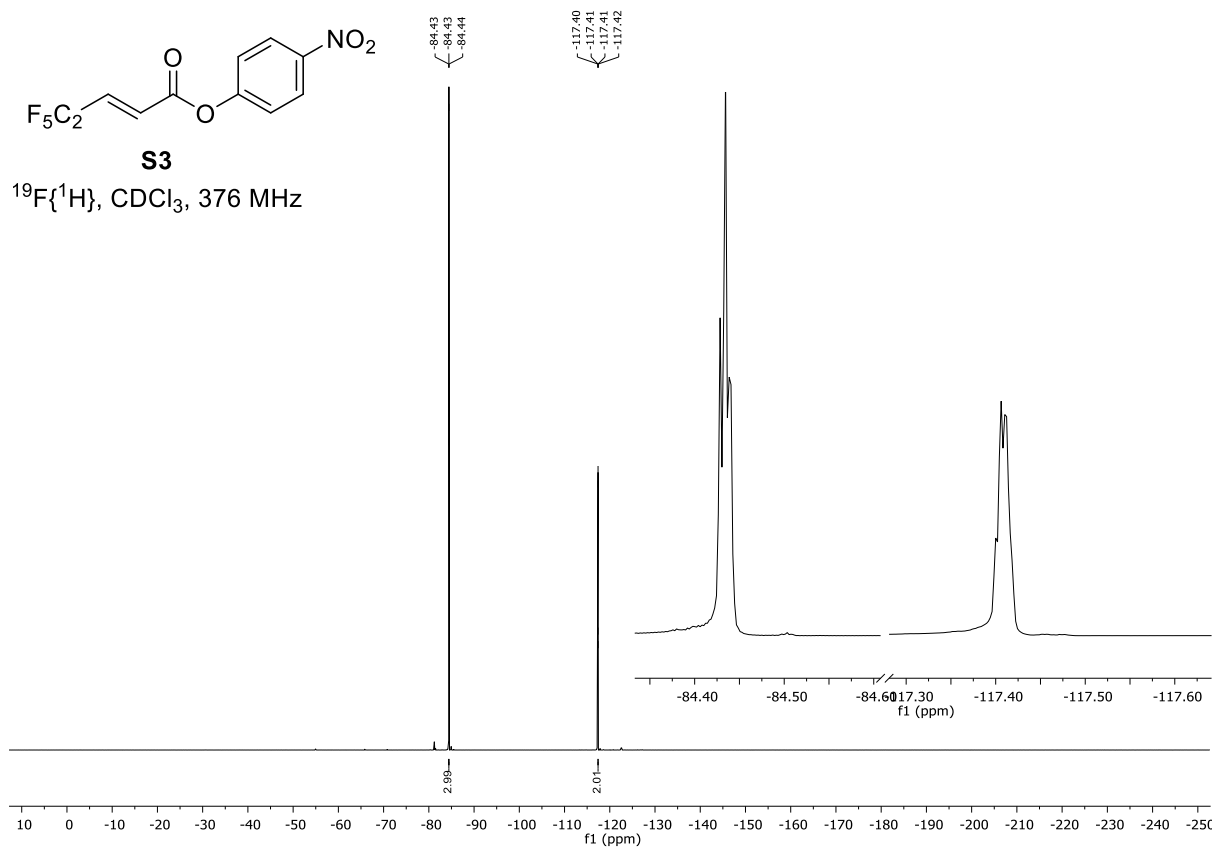

4-Nitrophenyl (*E*)-4,4-difluorobut-2-enoate (S4)

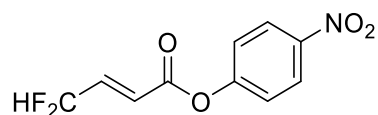

The title compound was prepared according to literature,<sup>52</sup> (*E*)-4,4-difluorobut-2-enoic acid (122 mg, 1.0 mmol) in anhydrous CH<sub>2</sub>Cl<sub>2</sub> (0.33 M) was added 4-nitrophenol (208.5 mg, 1.5 mmol), EDCI (38.5 mg, 2.0 mmol), DMAP (6.7 mg, 0.1 mmol) and stirred for 16 h. The solvent was then removed under reduced pressure and the residue was purified by column chromatography (4:1 Petrol:EtOAc) to give the title compound (102.7 mg, 32%) as a white solid. **mp** 74–76 °C (lit.<sup>50</sup> 74–76 °C); **IR**  $\nu_{\text{max}}$  (film) / cm<sup>-1</sup> 3119, 3080, 1736, 1530, 1391, 1344, 1169, 1036, 964, 856, 812; **<sup>1</sup>H NMR** (400 MHz, CDCl<sub>3</sub>)  $\delta_{\text{H}}$ : 6.34 (1H, tdd, *J* 54.5, 3.8, 1.1, CF<sub>2</sub>H), 6.52 (1H, dtd, *J* 15.9, 2.9, 1.1, F<sub>2</sub>CHCH=CH), 7.06 (1H, dtd, *J* 15.9, 10.3, 3.8, F<sub>2</sub>CHCH=CH), 7.33-7.37 (1H, m, ArC<sup>2,6</sup>H), 8.29-8.33 (2H, m, ArC<sup>3,5</sup>H); **<sup>19</sup>F{<sup>1</sup>H} NMR** (376 MHz, CDCl<sub>3</sub>)  $\delta_{\text{F}}$ : -116.91 (CHF<sub>2</sub>). Data in accordance with literature.<sup>52</sup>

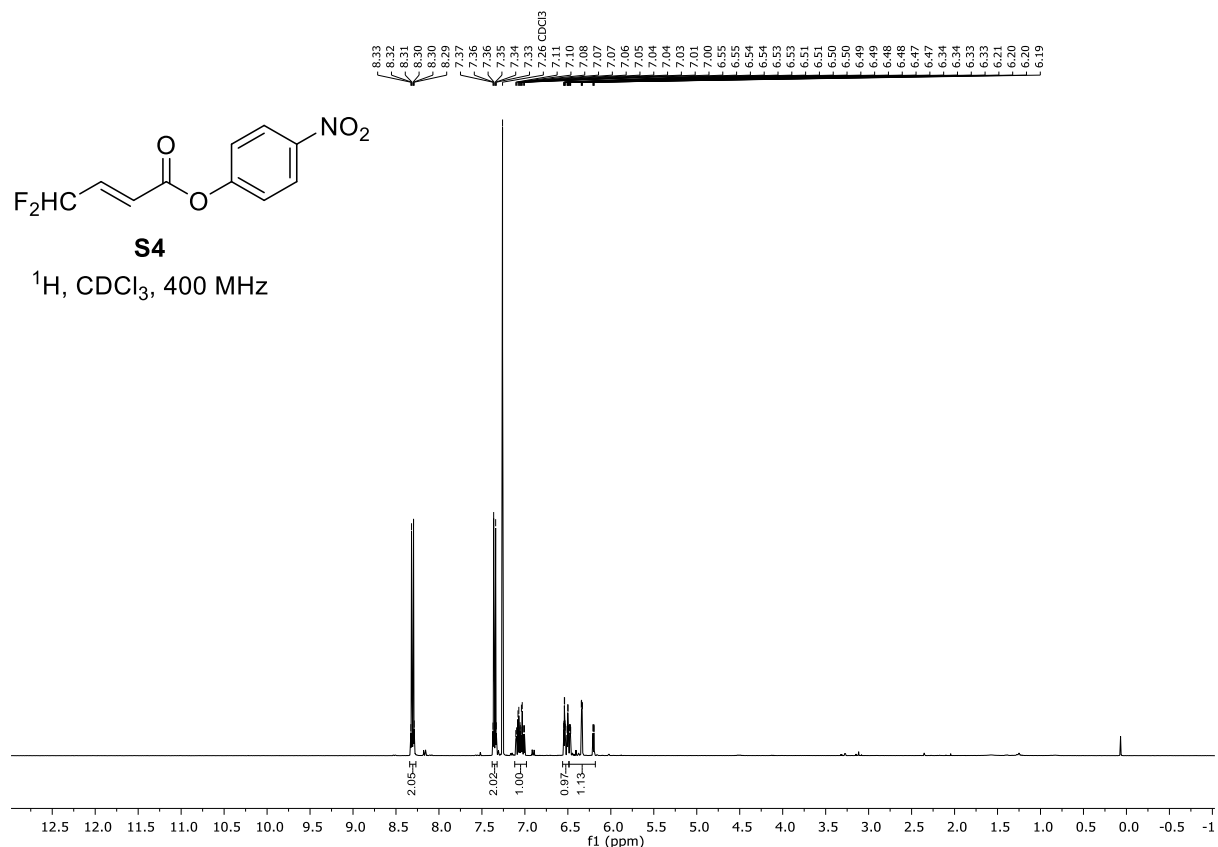

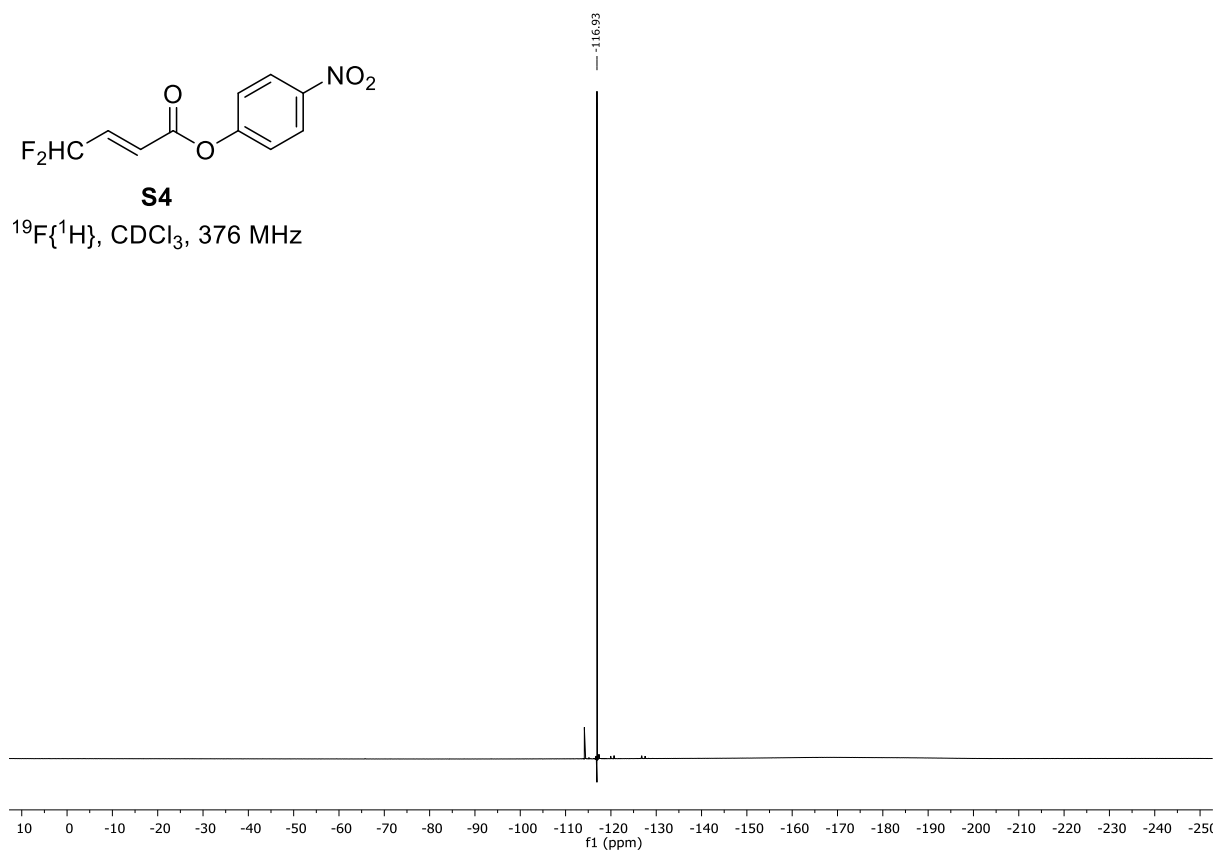

### Synthesis of $\beta$ -Ketoesters

( $\pm$ )-Methyl 1-acetyl-3-oxindoline-2-carboxylate (18)

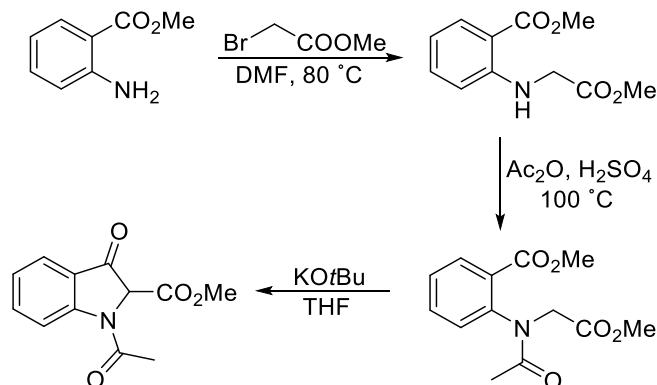

The title compound was prepared according to literature.<sup>53</sup> To methyl 2-aminobenzoate (4.00 g, 26.4 mmol) in DMF was added methyl bromoacetate (2.02 g, 13.2 mmol) at room temperature and the mixture was stirred at 80 °C for 12 h. The mixture was poured into water and extracted with Et<sub>2</sub>O and washed sequentially with water and brine, then dried over MgSO<sub>4</sub> and filtered. The solvent was removed under reduced pressure to give methyl 2-((2-methoxy-2-oxoethyl)amino)benzoate (5.17 g, 86%) as a yellow solid.

Methyl 2-((2-methoxy-2-oxoethyl)amino)benzoate (5.00 g, 22.4 mmol) was added to acetic anhydride/sulfuric acid (25 mL and a catalytic amount of conc. H<sub>2</sub>SO<sub>4</sub> (2 drops)) and heated to 100 °C for 5 h. The mixture was washed with saturated aqueous NaHCO<sub>3</sub>. The solvent was reduced in *vacuo*

and purified by column chromatography (1:1 Petrol:EtOAc) to give methyl 2-(*N*-(2-methoxy-2-oxoethyl)acetamido)benzoate (5.46 g, 89%) as a yellow oil.

Methyl 2-(*N*-(2-methoxy-2-oxoethyl)acetamido)benzoate (5.20 g, 19.6 mmol) and THF (40 mL) were added to a flask and stirred in ice bath under a N<sub>2</sub> atmosphere. KO<sup>t</sup>Bu (2.86 g, 25.5 mmol) was added to the solution, and it was stirred for an additional hour in an ice bath. Acetic acid (1.46 mL, 1.3 equiv.) was added to adjust the pH to about 6. The mixture was extracted with CH<sub>2</sub>Cl<sub>2</sub> and washed with brine. The solvent was removed under reduced pressure and the residue was purified by column chromatography (1:1 Petrol:EtOAc) to give the title compound as a white solid (3.29 g, 72%). The ratio of keto form to enol form in CDCl<sub>3</sub> is 74:26. **mp** 124–127 °C; **IR**  $\nu_{\text{max}}$  (film) / cm<sup>-1</sup> 3036, 2978, 2953, 1755, 1680, 1462, 1383, 1342, 1294, 1244, 1144, 933, 802; **<sup>1</sup>H NMR** (400 MHz, CDCl<sub>3</sub>)  $\delta_{\text{H}}$ : 2.20 (2.22H, s, CH<sub>3</sub> (keto)), 2.60 (0.78H, s, CH<sub>3</sub> (enol)), 3.86 (3H, s, OCH<sub>3</sub>), 5.00 (1H, s, NCH), 7.21–7.77 (4H, m, ArC<sup>4,5,6,7</sup>H), 8.59 (0.74H, br, OH (enol)). Data in accordance with literature.<sup>53</sup>

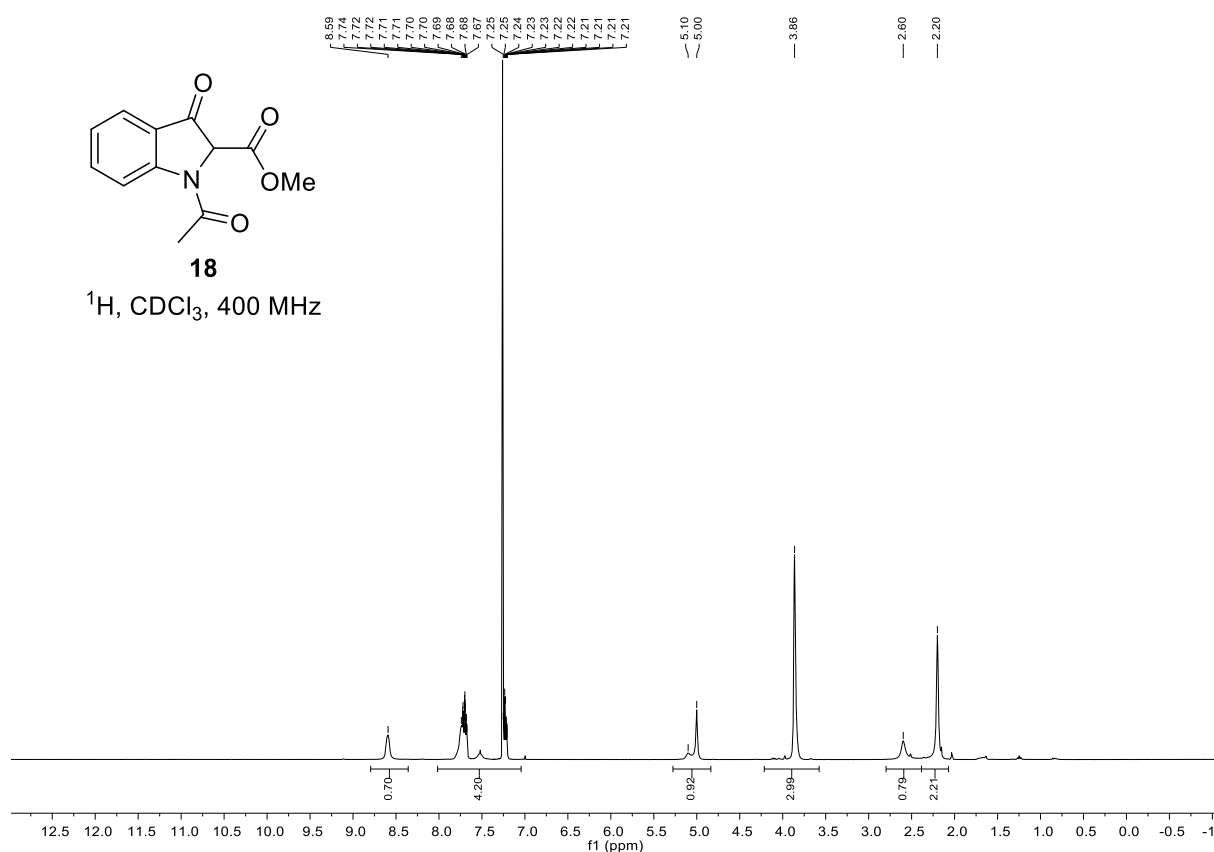

(±)-Ethyl 1-oxo-2,3-dihydro-1*H*-indene-2-carboxylate (S5)

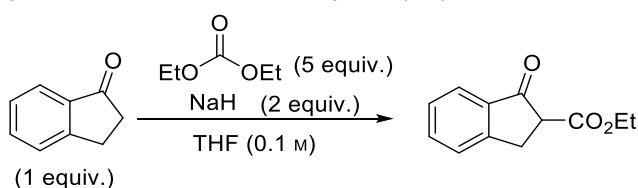

The title compound was prepared according to literature,<sup>54</sup> 2,3-dihydro-1*H*-inden-1-one (132 mg, 1.0 mmol) in anhydrous THF (0.1 M) was added diethyl carbonate (590 mg, 5.0 mmol) and NaH (48 mg, 2.0 mmol) and heated to reflux for 4 h. The mixture was poured into water and extracted with EtOAc. The solvent was removed under reduced pressure and the residue was purified by column chromatography (3:1 Petrol:EtOAc) to give the title compound (144.8 mg, 71%) as a brown oil. The ratio of the keto form to the enol form in CDCl<sub>3</sub> is 85:15. **IR**  $\nu_{\max}$  (film) / cm<sup>-1</sup> 2980, 2934, 1736, 1709, 1464, 1254, 1207, 1013, 858; **<sup>1</sup>H NMR** (400 MHz, CDCl<sub>3</sub>, 86:14 mixture of keto : enol form)  $\delta_{\text{H}}$ : 1.31 (2.58H, t, *J* 7.1, OCH<sub>2</sub>CH<sub>3</sub>), 1.37 (0.42H, t, *J* 7.1, OCH<sub>2</sub>CH<sub>3</sub>), 3.37 (0.86H, dd, *J* 17.2, 8.3, ArCH<sub>A</sub>H<sub>B</sub>CH), 3.52 (0.28H, s, ArCH<sub>2</sub>, enol), 3.56 (0.86H, dd, *J* 17.2, 4.0, ArCH<sub>A</sub>H<sub>B</sub>CH), 3.71 (0.86H, dd, *J* 8.3, 4.0, ArCH<sub>2</sub>CH), 4.24 (0.86H, dq, *J* 10.8, 7.1, OCH<sub>A</sub>H<sub>B</sub>CH<sub>3</sub>), 4.26 (0.86H, dq, *J* 10.8, 7.1, OCH<sub>A</sub>H<sub>B</sub>CH<sub>3</sub>), 4.32 (0.28H, *J* 7.1, OCH<sub>2</sub>CH<sub>3</sub>), 7.36-7.40 (0.14H, m, ArC<sup>5</sup>H), 7.39 (0.86H, app tq, *J* 7.5, 0.8, ArC<sup>5</sup>H), 7.42 (0.14H, app td, *J* 7.3, 1.4, ArC<sup>6</sup>H), 7.47 (0.14H, app ddq, *J* 7.4, 1.4, 0.7, ArC<sup>4</sup>H), 7.50 (0.86H, app dp, *J* 7.6, 0.9, ArC<sup>4</sup>H), 7.62 (0.86H, app td, *J* 7.5, 1.2, ArC<sup>6</sup>H), 7.64 (0.14H, ddd, *J* 7.6, 1.4, 0.9, ArC<sup>7</sup>H), 7.77 (1H, ddd, *J* 7.6, 1.3, 0.8, ArC<sup>7</sup>H). Data in accordance with literature.<sup>54</sup>

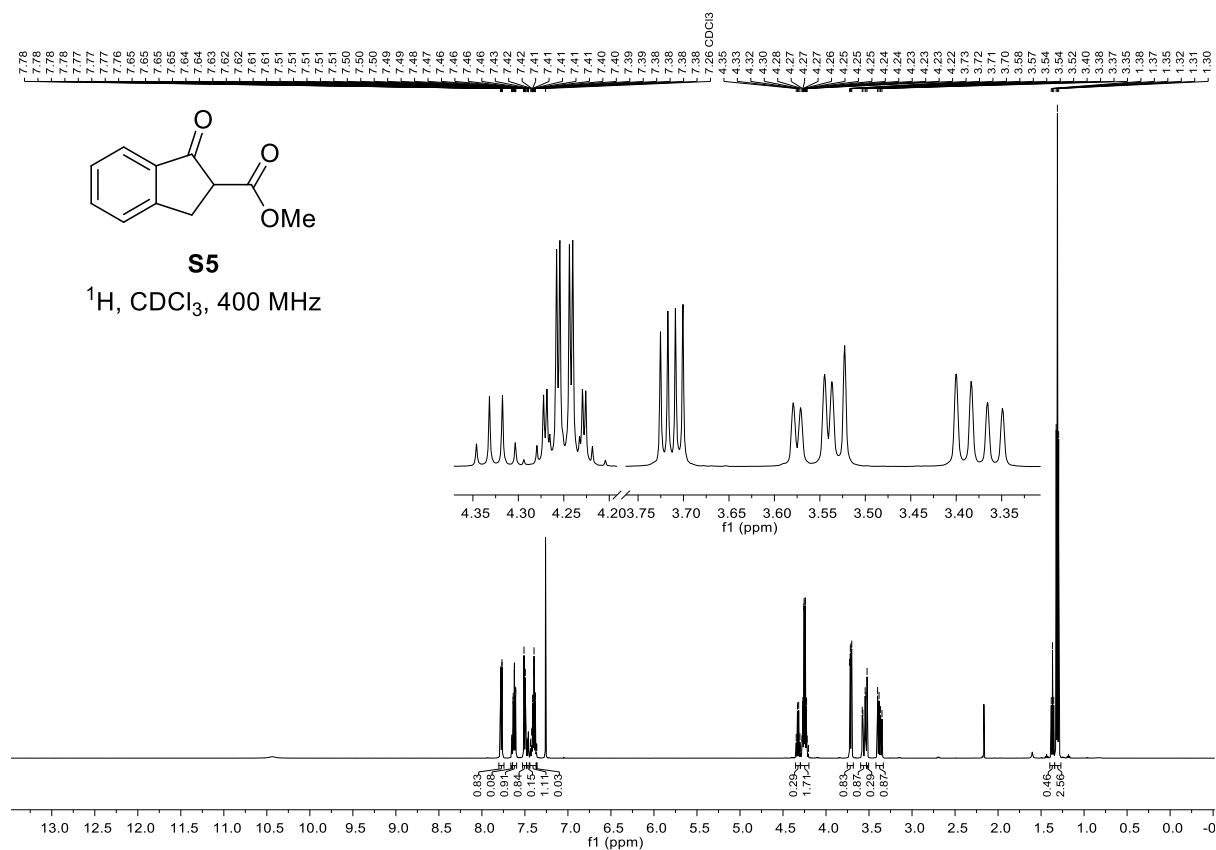

(±)-Ethyl 3-oxo-2,3-dihydrobenzofuran-2-carboxylate (S6)

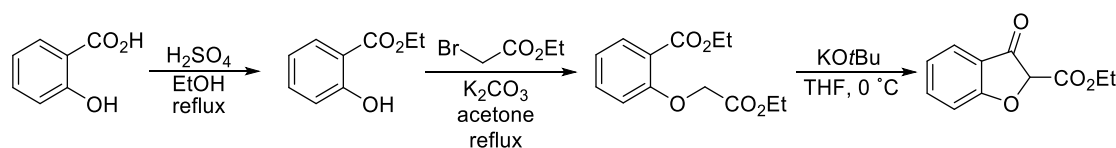

The title compound was prepared according to literature.<sup>55</sup> To a solution of 2-hydroxybenzoic acid (500 mg, 3.6 mmol) in anhydrous EtOH (15 mL) was added concentrated H<sub>2</sub>SO<sub>4</sub> (0.4 mL). The reaction was stirred under reflux for 5 h. The mixture was poured into water and extracted with CH<sub>2</sub>Cl<sub>2</sub>. The organic extract was dried over MgSO<sub>4</sub> and filtered. The solvent was removed under reduced pressure and the residue was purified by column chromatography (3:1 Petrol:EtOAc) to give ethyl 2-hydroxybenzoate (0.6 g, 100%) as colourless oil.

A mixture of ethyl 2-hydroxybenzoate (0.6 g, 3.6 mmol), potassium carbonate (1.0 g, 0.73 mmol) and ethyl bromoacetate (0.48 mL, 4.3 mmol) in acetone (5 mL) was stirred at 60 °C for 3 h. The reaction was filtered and concentrated under reduced pressure to give ethyl 2-(2-ethoxy-2-oxoethoxy)benzoate (1.0 g, 95%) as orange oil.

Potassium *tert*-butoxide (1.0 g, 17.8 mmol) in anhydrous THF (15 mL) was added to a flame dried flask and placed in an ice bath under an N<sub>2</sub> atmosphere. A solution of ethyl 2-(2-ethoxy-2-oxoethoxy)benzoate in anhydrous THF (5 mL) was then added dropwise over 1 h. The mixture was quenched with saturated aqueous NH<sub>4</sub>Cl and extracted with EtOAc. The organic extract was washed with saturated aqueous NH<sub>4</sub>Cl, dried over MgSO<sub>4</sub> and filtered. The solvent was removed under reduced pressure and the residue was purified by column chromatography (3:1 Petrol:EtOAc) to give the title compound (1.29 g, 72%) as a white solid. **mp** 75–77 °C; **IR**  $\nu_{\text{max}}$  (film) / cm<sup>-1</sup> 3345, 3075, 2967, 1736, 1680, 1609, 1584, 1466, 1441, 1263, 1134, 1016, 852; **<sup>1</sup>H NMR** (400 MHz, CDCl<sub>3</sub>)  $\delta_{\text{H}}$ : 1.46 (3H, t, *J* 7.1, OCH<sub>2</sub>CH<sub>3</sub>), 4.48 (2H, q, *J* 7.2, OCH<sub>2</sub>CH<sub>3</sub>), 7.30 (1H, ddd, *J* 8.0, 6.0, 2.1, ArC<sup>5</sup>H), 7.44–7.53 (2H, m, ArC<sup>6,7</sup>H), 7.74 (1H, app dt, *J* 8.0, 1.0, ArC<sup>4</sup>H), 8.15 (1H, br, OH); Data in accordance with literature.<sup>55</sup>

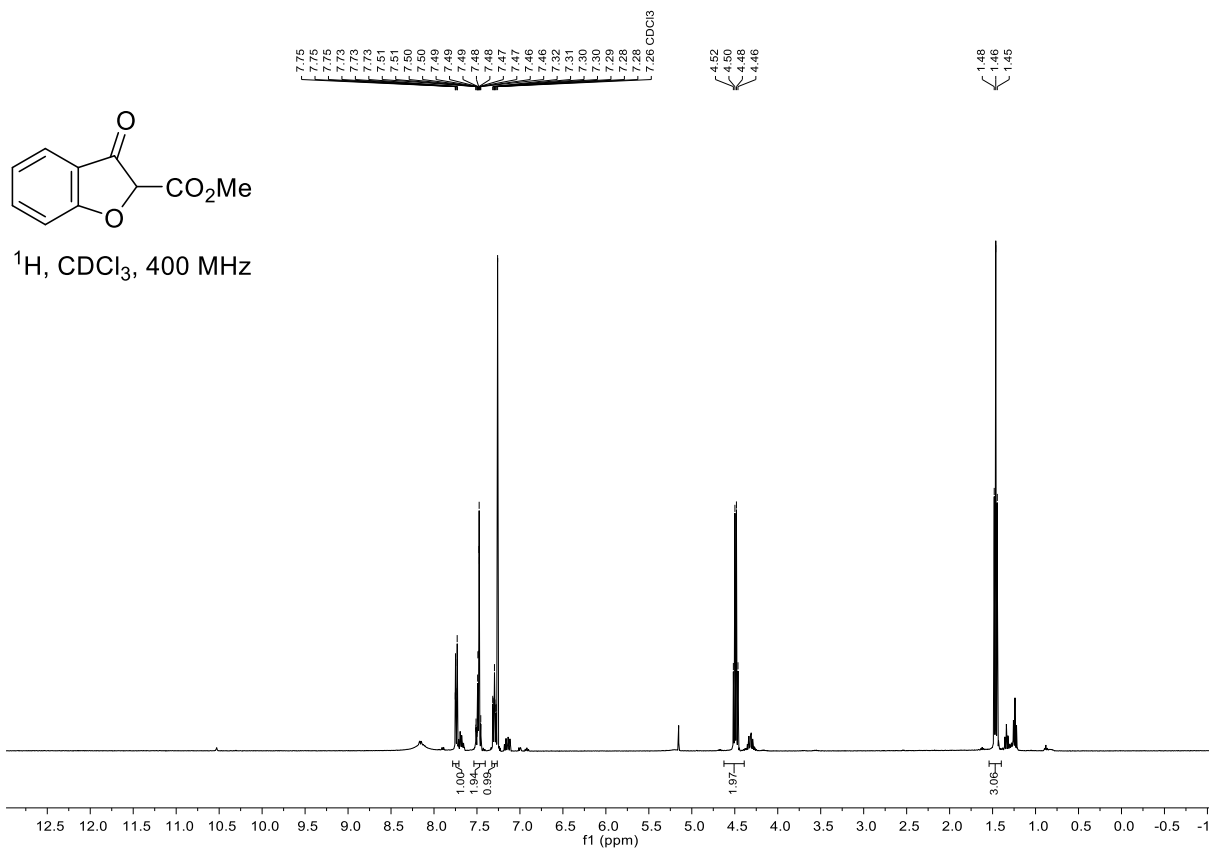

### Synthesis of the Michael Addition Products

(+)-Ethyl (*S*)-1-((*S*)-4'-(benzylamino)-1',1',1'-trifluoro-4'-oxobutan-2'-yl)-2-oxocyclopentane-1-carboxylate (*1S,2'S*)-**9**

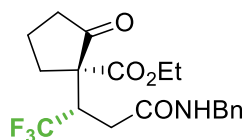

(*1S,2'S*)-**9**

#### Preparation from (*E*)-enoate:

The title compound was prepared according to **General Procedure 2**. A mixture of 4-nitrophenyl (*E*)-4,4,4-trifluorobut-2-enoate **8** (26.1 mg, 0.1 mmol), (*2S,3R*)-HyperBTM **1** (1.5 mg, 5 μmol) and methyl 2-oxocyclopentane-1-carboxylate (15 μL, 0.1 mmol) in DMA (0.4 mL) was stirred for 16 h at room temperature. Benzylamine (11 μL, 0.1 mmol) was then added, and the reaction was permitted to stir for 1 h. The solution was diluted with EtOAc, washed sequentially with saturated aqueous Na<sub>2</sub>CO<sub>3</sub> (×3) and brine, then dried over MgSO<sub>4</sub> and filtered. The solvent was removed under reduced pressure and the residue was purified by column chromatography (1:4 EtOAc:Hexane) to give the title compound (23.2 mg, 59%, >95:5 d.r.) as a white solid.

### Preparation from (*Z*)-enoate:

Following **General Procedure 2**, a mixture of 4-nitrophenyl (*Z*)-4,4,4-trifluorobut-2-enoate **25** (26.1 mg, 0.1 mmol), (*2S,3R*)-HyperBTM **1** (1.5 mg, 5  $\mu$ mol) and methyl 2-oxocyclopentane-1-carboxylate **7** (15  $\mu$ L, 0.1 mmol) in DMA (0.4 mL) was stirred for 16 h at room temperature. Benzylamine (11  $\mu$ L, 0.1 mmol) was then added, and the reaction was permitted to stir for 1 h. The solution was diluted with Et<sub>2</sub>O, washed sequentially with saturated aqueous Na<sub>2</sub>CO<sub>3</sub> ( $\times$ 3) and brine, dried over MgSO<sub>4</sub> and filtered. The solvent was removed under reduced pressure and the residue was purified by column chromatography (1:4 EtOAc:Hexane) to give the title compound (15.7 mg, 40%, >95:5 d.r.) as a colourless oil.

*Data for (1S,2'S)-9*: mp 65-70 °C;  $[\alpha]_D^{20} +0.25$  (*c* 0.8 in CHCl<sub>3</sub>); IR  $\nu_{\max}$  (film) / cm<sup>-1</sup> 3294, 1749, 1641, 1560, 1225, 1145, 1118, 989, 858; <sup>1</sup>H NMR (500 MHz, CDCl<sub>3</sub>)  $\delta_H$ : 1.24 (3H, t, *J* 7.1, OCH<sub>2</sub>CH<sub>3</sub>), 1.91-2.00 (1H, m, COCH<sub>2</sub>CH<sub>A</sub>H<sub>B</sub>), 2.00-2.08 (1H, m, COCH<sub>2</sub>CH<sub>A</sub>H<sub>B</sub>), 2.13 (1H, dddd, *J* 13.5, 9.3, 7.3, 1.1, CCH<sub>A</sub>H<sub>B</sub>CH<sub>2</sub>), 2.31-2.44 (2H, m, COCH<sub>2</sub>CH<sub>2</sub>), 2.50 (1H, dd, *J* 16.1, 7.1, CHCH<sub>A</sub>H<sub>B</sub>CONH), 2.67 (1H, ddd, *J* 13.5, 7.1, 4.2, CCH<sub>A</sub>H<sub>B</sub>CH<sub>2</sub>), 2.75 (1H, dd, *J* 16.1, 4.3, CHCH<sub>A</sub>H<sub>B</sub>CONH), 3.76 (1H, qdd, *J* 9.4, 7.1, 4.3, CHCH<sub>2</sub>CONH), 4.14 (2H, q, *J* 7.1, OCH<sub>2</sub>CH<sub>3</sub>), 4.40 (1H, dd, *J* 14.7, 5.6, NHCH<sub>A</sub>H<sub>B</sub>Ph), 4.46 (1H, dd, 14.7, 5.8, NHCH<sub>A</sub>H<sub>B</sub>Ph), 5.96 (1H, app t (br), *J* 5.8, 5.6, NH), 7.25-7.30 (3H, m, PhC<sup>2,4,6</sup>H), 7.30-7.35 (2H, PhC<sup>3,5</sup>H); <sup>13</sup>C{<sup>1</sup>H} NMR (126 MHz, CDCl<sub>3</sub>)  $\delta_C$ : 14.0 (OCH<sub>2</sub>CH<sub>3</sub>), 19.5 (COCH<sub>2</sub>CH<sub>2</sub>), 30.6 (CCH<sub>2</sub>CH<sub>2</sub>), 33.1 (CHCH<sub>2</sub>CONH), 37.6 (COCH<sub>2</sub>CH<sub>2</sub>), 43.6 (q, *J* 25.9, CHCH<sub>2</sub>CONH), 44.0 (NHCH<sub>2</sub>Ph), 60.5 (CCH<sub>2</sub>CH<sub>2</sub>), 62.6 (OCH<sub>2</sub>CH<sub>3</sub>), 126.8 (q, *J* 282.2, CF<sub>3</sub>), 127.7 (PhC<sup>4</sup>H), 127.9 (PhC<sup>2,6</sup>H), 128.8 (PhC<sup>3,5</sup>H), 138.1 (PhC<sup>1</sup>), 168.6 (COOEt), 169.3 (CONH), 211.0 (COCH<sub>2</sub>CH<sub>2</sub>); <sup>19</sup>F NMR (471 MHz, CDCl<sub>3</sub>)  $\delta_F$ : -63.66 (d, *J* 9.4, CF<sub>3</sub>); HRMS (ESI<sup>+</sup>) C<sub>19</sub>H<sub>23</sub>F<sub>3</sub>O<sub>4</sub>N [M+H]<sup>+</sup> found 386.1563, requires 386.1579 (-2.8 ppm).



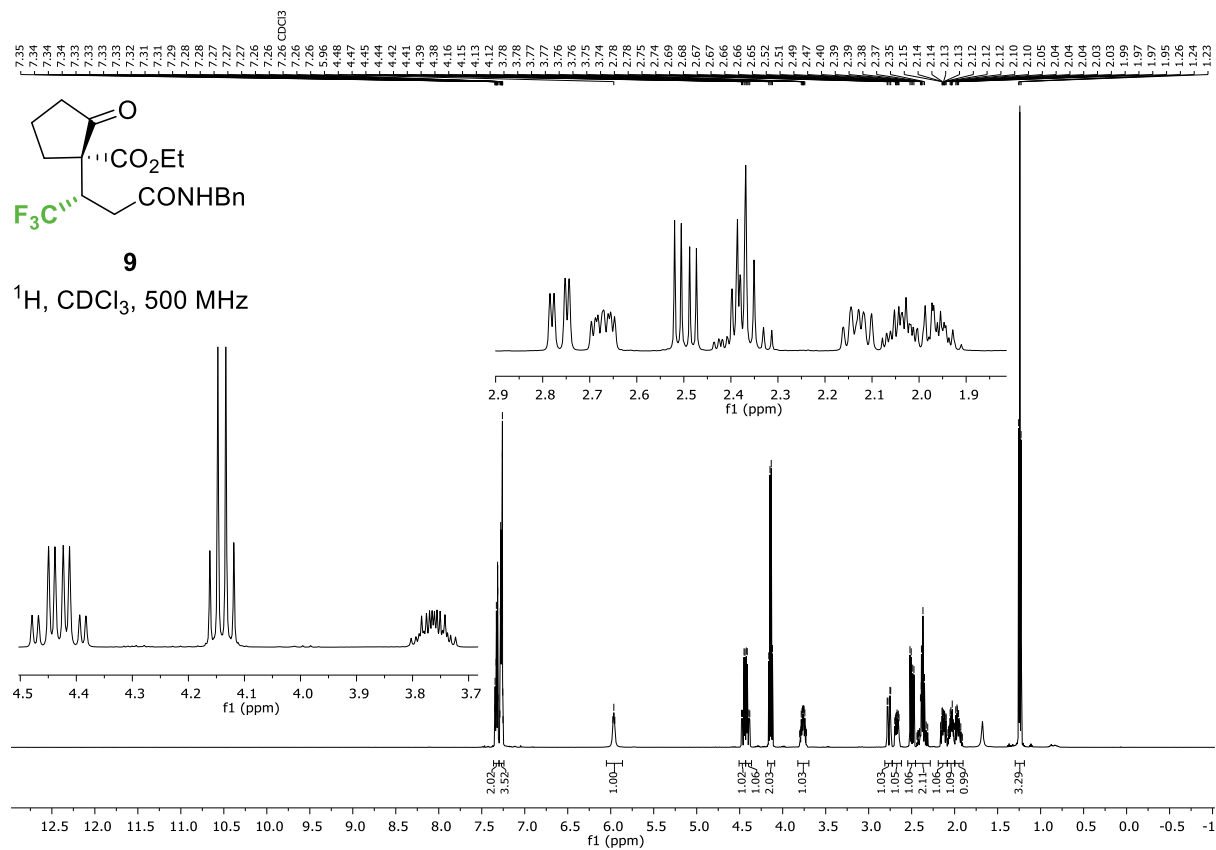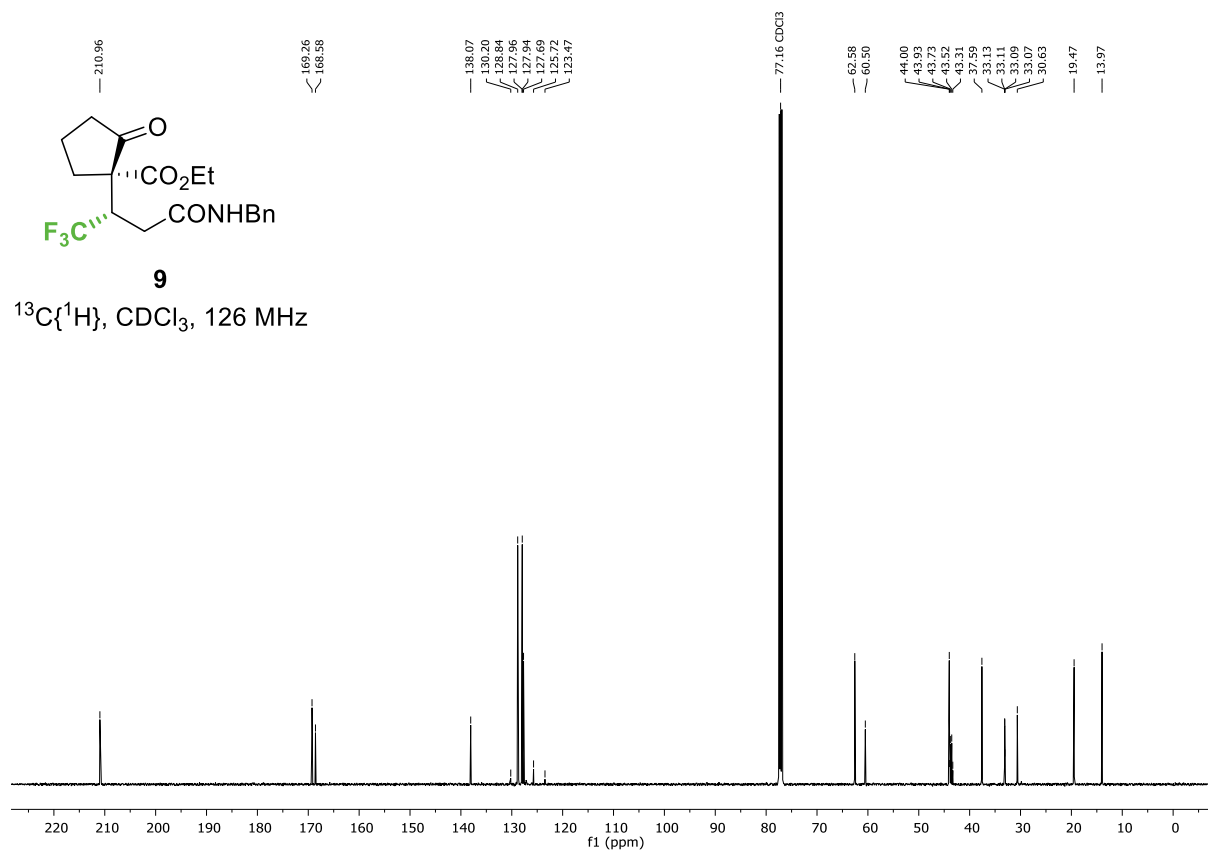

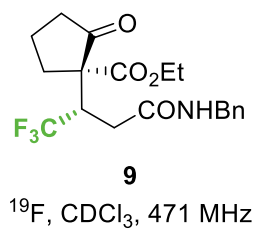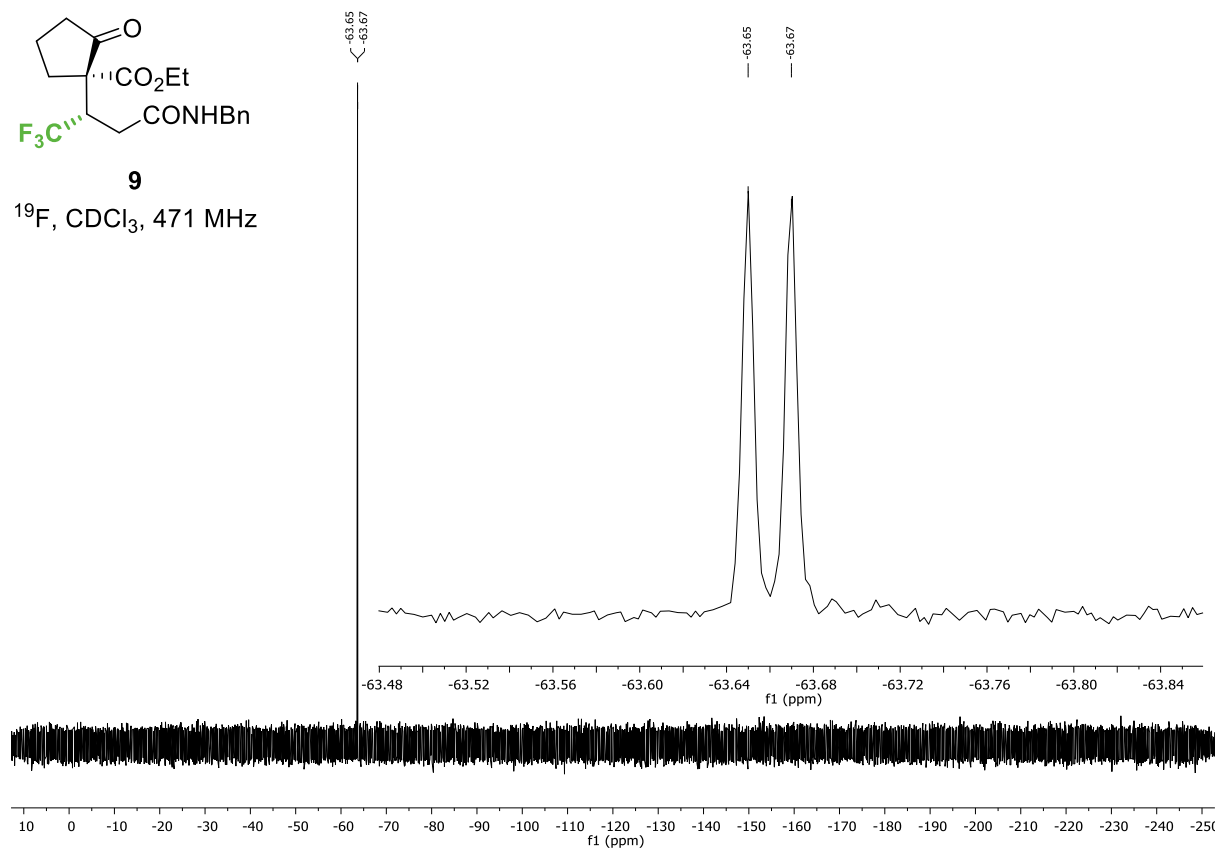

**HPLC Data for 9 from (*E*)-enoate:** Chiralpak AD-H (95:5 hexane:*i*PrOH, flow rate 1.00 mL·min<sup>-1</sup>, 211 nm, 30 °C)  $t_R$  (1*S*,2'*S*): 21.2 min,  $t_R$  (1*R*,2'*R*): 27.9 min, 99:1 er.

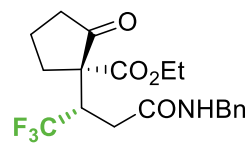

(1*S*,2'*S*)-**9**

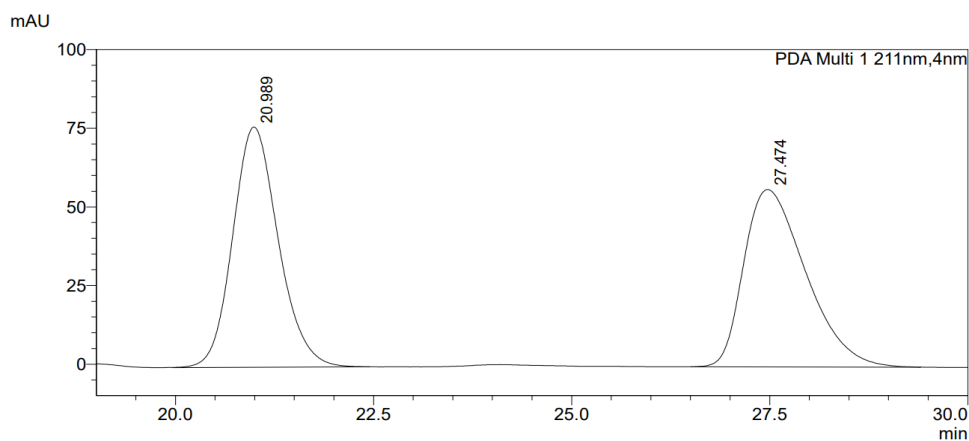

<Peak Table>

| PDA Ch1 211nm |           |         |
|---------------|-----------|---------|
| Peak#         | Ret. Time | Area%   |
| 1             | 20.989    | 49.968  |
| 2             | 27.474    | 50.032  |
| Total         |           | 100.000 |

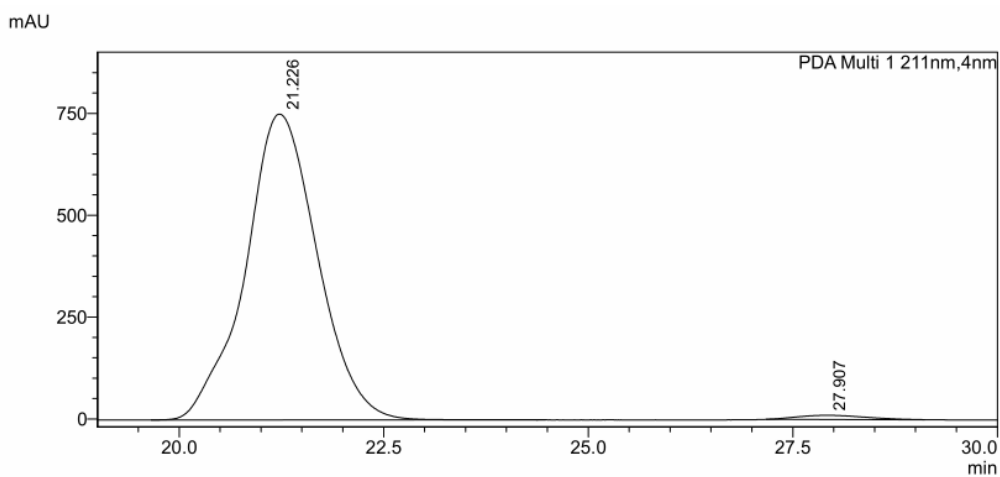

<Peak Table>

| PDA Ch1 211nm |           |         |
|---------------|-----------|---------|
| Peak#         | Ret. Time | Area%   |
| 1             | 21.226    | 98.742  |
| 2             | 27.907    | 1.258   |
| Total         |           | 100.000 |

**HPLC Data for 9 from (Z)-enoate:** Chiralpak AD-H (95:5 hexane:*i*PrOH, flow rate 1.00 mL·min<sup>-1</sup>, 211 nm, 30 °C) *t<sub>R</sub>* (1*S*,2'*S*): 21.3 min, *t<sub>R</sub>* (1*R*,2'*R*): 27.8 min, 82:18 er.

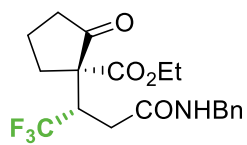

(1*S*,2'*S*)-9

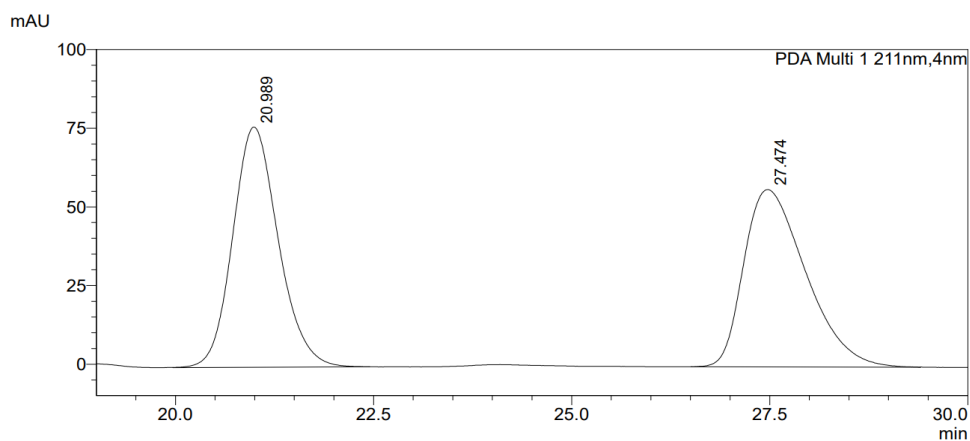

<Peak Table>

| PDA Ch1 211nm |           |         |
|---------------|-----------|---------|
| Peak#         | Ret. Time | Area%   |
| 1             | 20.989    | 49.968  |
| 2             | 27.474    | 50.032  |
| Total         |           | 100.000 |

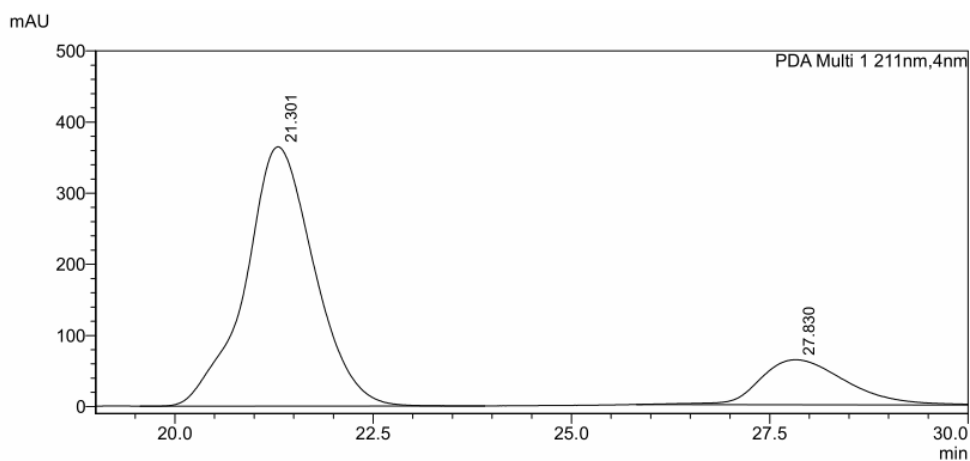

<Peak Table>

| PDA Ch1 211nm |           |         |
|---------------|-----------|---------|
| Peak#         | Ret. Time | Area%   |
| 1             | 21.301    | 82.106  |
| 2             | 27.830    | 17.894  |
| Total         |           | 100.000 |

(+)-Ethyl (S)-1-((S)-4'-(benzylamino)-1'-chloro-1',1'-difluoro-4'-oxobutan-2'-yl)-2-oxocyclopentane-1-carboxylate (1S,2'S)-10

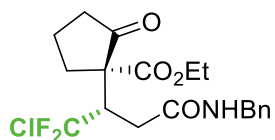

(1S,2'S)-10

The title compound was prepared according to **General Procedure 2**. A mixture of 4-nitrophenyl (*E*)-4-chloro-4,4-difluorobut-2-enoate **S1** (27.7 mg, 0.1 mmol), (2*S*,3*R*)-HyperBTM **1** (1.5 mg, 5 μmol) and

methyl 2-oxocyclopentane-1-carboxylate **7** (15  $\mu$ L, 0.1 mmol) in DMA (0.4 mL) was stirred for 16 h at room temperature. Benzylamine (11  $\mu$ L, 0.1 mmol) was added, and the reaction was permitted to stir for 1 h. The solution was diluted with EtOAc, washed sequentially with saturated aqueous  $\text{Na}_2\text{CO}_3$  ( $\times 3$ ), and brine, dried over  $\text{MgSO}_4$  and filtered. The EtOAc was removed under reduced pressure and the residue was purified by column chromatography (1:4 EtOAc:Hexane) to give the title compound (14.7 mg, 36%, >95:5 d.r.) as a white solid.

*Data for (1S,2'S)-10*: mp 48-52  $^\circ\text{C}$ ;  $[\alpha]_D^{20}$  +2.41 (*c* 1.16 in  $\text{CHCl}_3$ ); IR  $\nu_{\text{max}}$  (film) /  $\text{cm}^{-1}$  3292, 2965, 1726, 1651, 1182, 1105, 957, 908, 868;  $^1\text{H NMR}$  (500 MHz,  $\text{CDCl}_3$ )  $\delta_{\text{H}}$ : 1.23 (3H, t, *J* 7.1,  $\text{OCH}_2\text{CH}_3$ ), 1.85-1.97 (1H, m,  $\text{COCH}_2\text{CH}_A\text{H}_B$ ), 2.04 (1H, app dtdd, *J* 13.3, 7.2, 5.9, 4.1,  $\text{COCH}_2\text{CH}_A\text{H}_B$ ), 2.19 (1H, app dddd, *J* 13.8, 9.6, 7.2, 1.2,  $\text{CCH}_A\text{H}_B\text{CH}_2$ ), 2.30-2.43 (2H, m,  $\text{COCH}_2\text{CH}_2$ ), 2.61 (1H, dd, *J* 16.5, 5.7,  $\text{CHCH}_A\text{H}_B\text{CONH}$ ), 2.70 (1H, ddd, *J* 13.8, 7.2, 4.2,  $\text{CCH}_A\text{H}_B\text{CH}_2$ ), 2.86 (1H, dd, *J* 16.5, 4.8,  $\text{CHCH}_A\text{H}_B\text{CONH}$ ), 3.95 (1H, dddd, *J* 19.0, 5.7, 4.9, 4.1,  $\text{CHCH}_2\text{CONH}$ ), 4.09 (1H, dq, *J* 10.5, 7.1,  $\text{OCH}_A\text{H}_B\text{CH}_3$ ), 4.13 (1H, dq, *J* 10.5, 7.1,  $\text{OCH}_A\text{H}_B\text{CH}_3$ ), 4.42 (1H, dd, *J* 14.6, 5.7,  $\text{NHCH}_A\text{H}_B\text{Ph}$ ), 4.42 (1H, dd, *J* 14.6, 5.8,  $\text{NHCH}_A\text{H}_B\text{Ph}$ ), 6.01 (1H, app t (br), *J* 5.7, *NH*), 7.25-7.30 (3H, m,  $\text{PhC}^{2,4,6}\text{H}$ ), 7.30-7.35 (2H, m,  $\text{PhC}^{3,5}\text{H}$ );  $^{13}\text{C}\{^1\text{H}\}$  NMR (126 MHz,  $\text{CDCl}_3$ )  $\delta_{\text{C}}$ : 13.9 ( $\text{OCH}_2\text{CH}_3$ ), 19.5 ( $\text{COCH}_2\text{CH}_2$ ), 30.9 ( $\text{CCH}_2\text{CH}_2$ ), 34.3 ( $\text{CHCH}_2$ ), 37.6 ( $\text{COCH}_2\text{CH}_2$ ), 44.0 ( $\text{NHCH}_2\text{Ph}$ ), 49.8 (app t, *J* 21.0,  $\text{CHCH}_2$ ), 61.5 ( $\text{CCH}_2\text{CH}_2$ ), 62.6 ( $\text{OCH}_2\text{CH}_3$ ), 127.7 ( $\text{PhC}^4\text{H}$ ), 128.0 ( $\text{PhC}^{2,6}\text{H}$ ), 128.8 ( $\text{PhC}^{3,5}\text{H}$ ), 130.7 (app t, *J* 297.8,  $\text{CF}_2\text{Cl}$ ), 138.1 ( $\text{PhC}^1$ ), 168.5 ( $\text{COOEt}$ ), 169.4 ( $\text{CONH}$ ), 210.8 ( $\text{COCH}_2\text{CH}_2$ );  $^{19}\text{F NMR}$  (471 MHz,  $\text{CDCl}_3$ )  $\delta_{\text{F}}$ : -51.40 (1F, dd, *J* 162.9, 19.1,  $\text{CF}_A\text{F}_B\text{Cl}$ ), -46.99 (1F, dd, *J* 162.4, 4.1,  $\text{CF}_A\text{F}_B\text{Cl}$ ); HRMS ( $\text{ESI}^+$ )  $\text{C}_{19}\text{H}_{23}\text{F}_2\text{O}_4\text{NCl}$   $[\text{M}]^+$  found 402.1270, requires 402.1278 (-2.0 ppm).

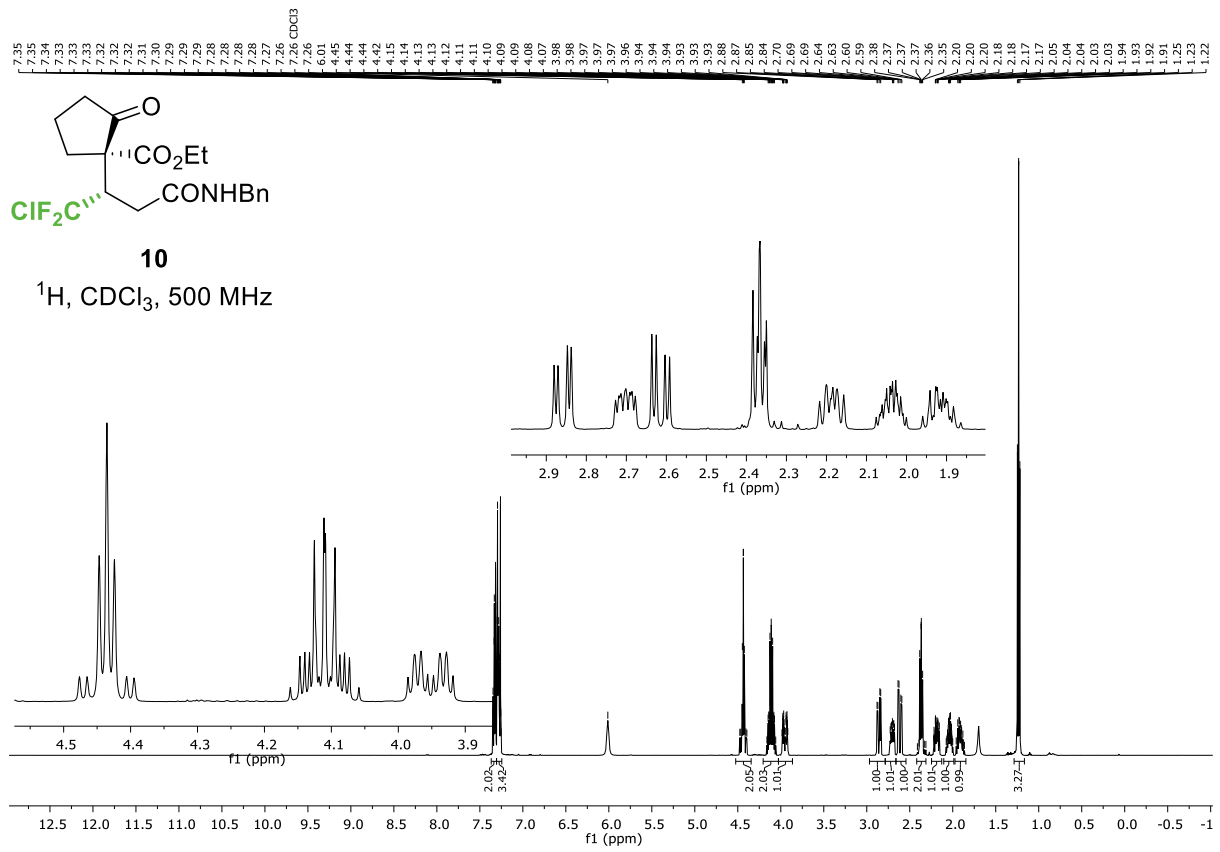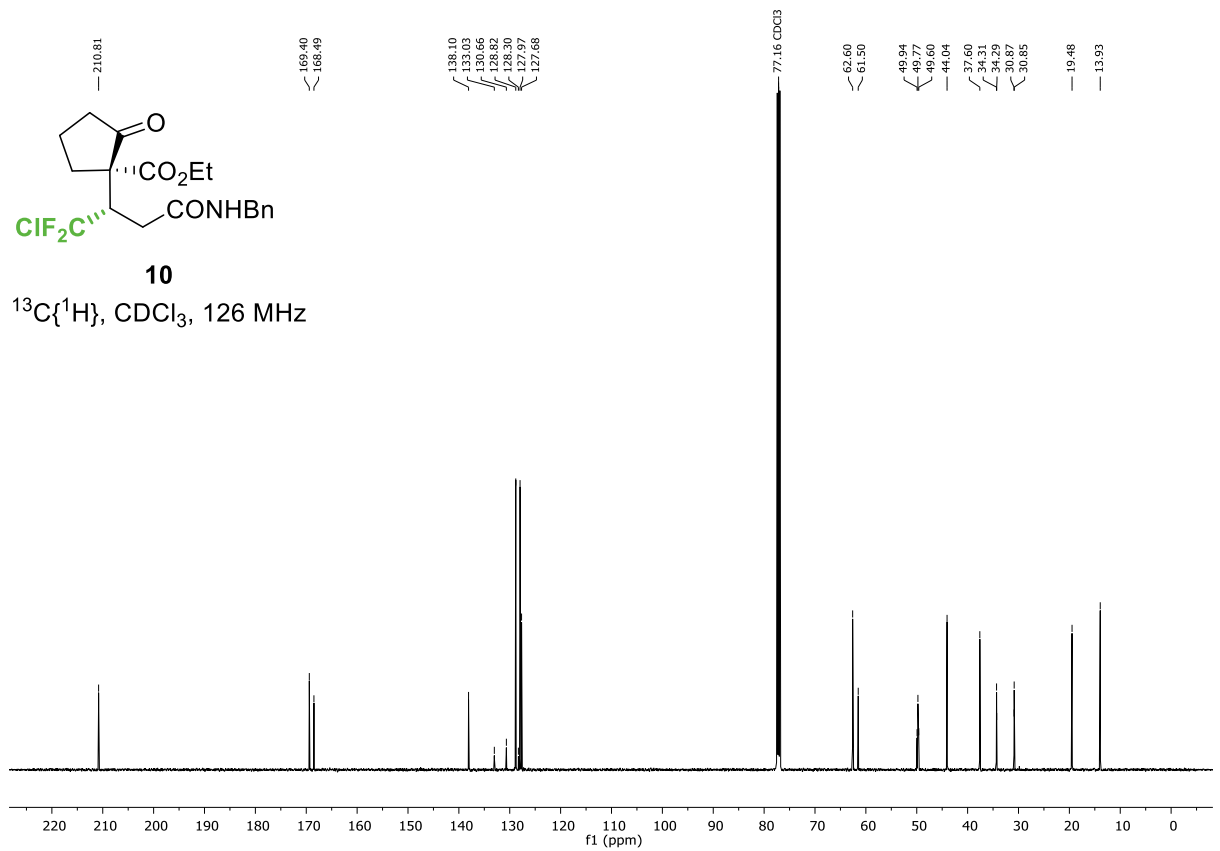

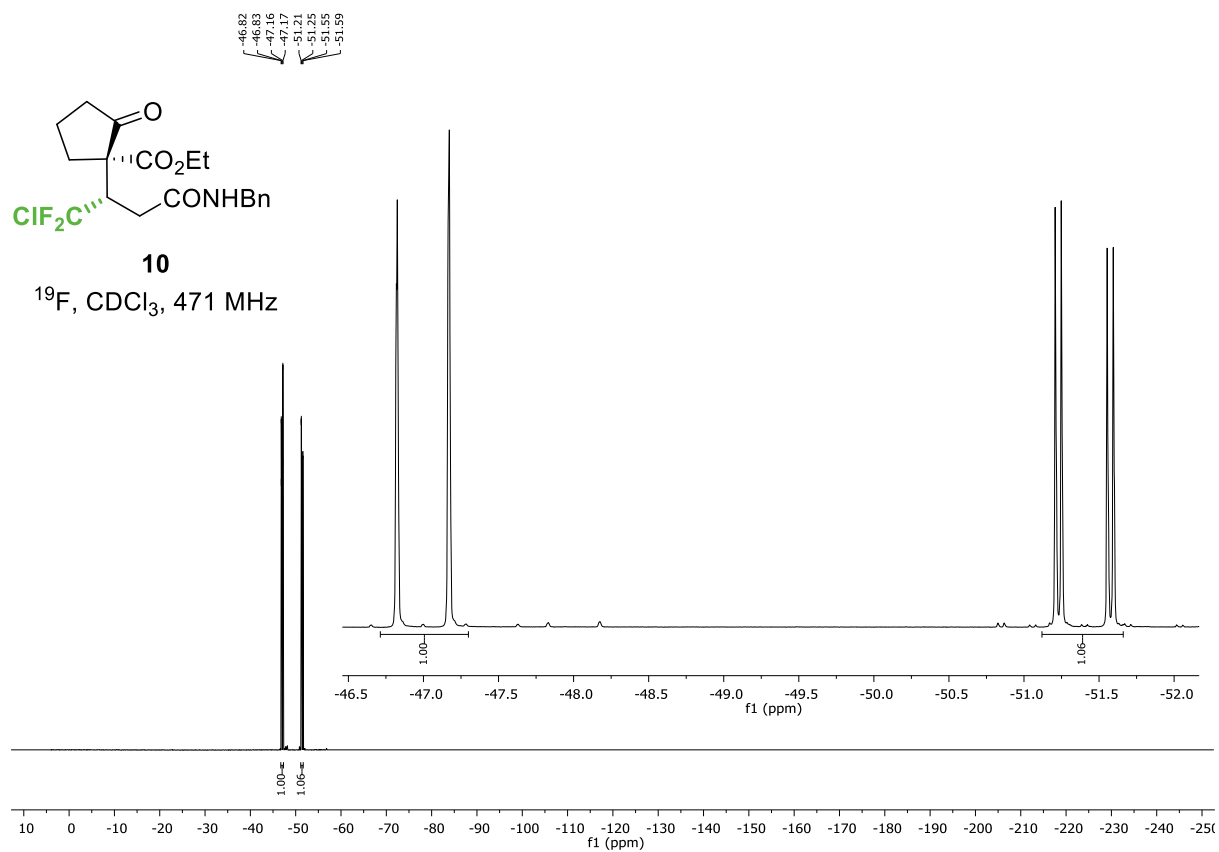

**HPLC Data for 10:** Chiralpak AD-H (90:10 hexane:*i*PrOH, flow rate 1.00 mL·min<sup>-1</sup>, 254 nm, 30 °C)

$t_R$  (1*S*,2'*S*): 10.2 min,  $t_R$  (1*R*,2'*R*): 12.7 min, 99:1 er.

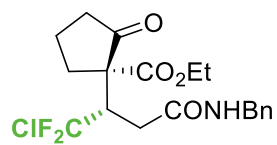

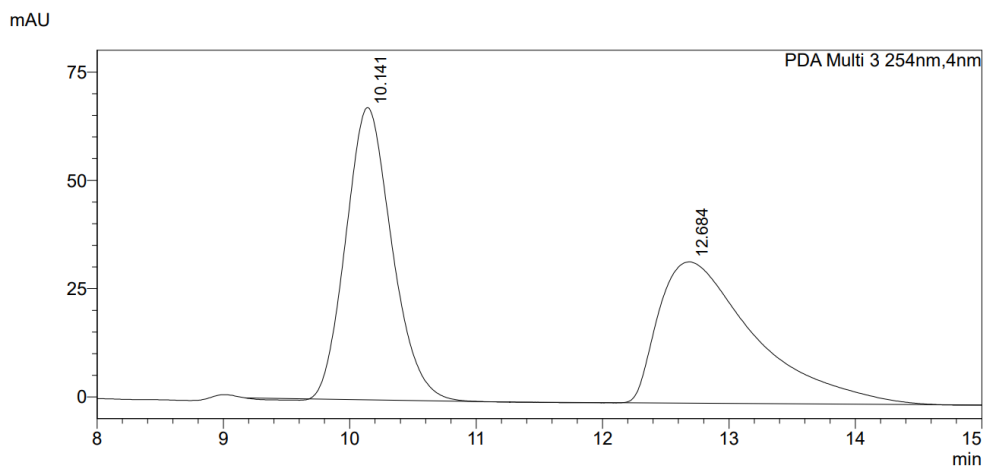

<Peak Table>

PDA Ch3 254nm

| Peak# | Ret. Time | Area%   |
|-------|-----------|---------|
| 1     | 10.141    | 49.726  |
| 2     | 12.684    | 50.274  |
| Total |           | 100.000 |

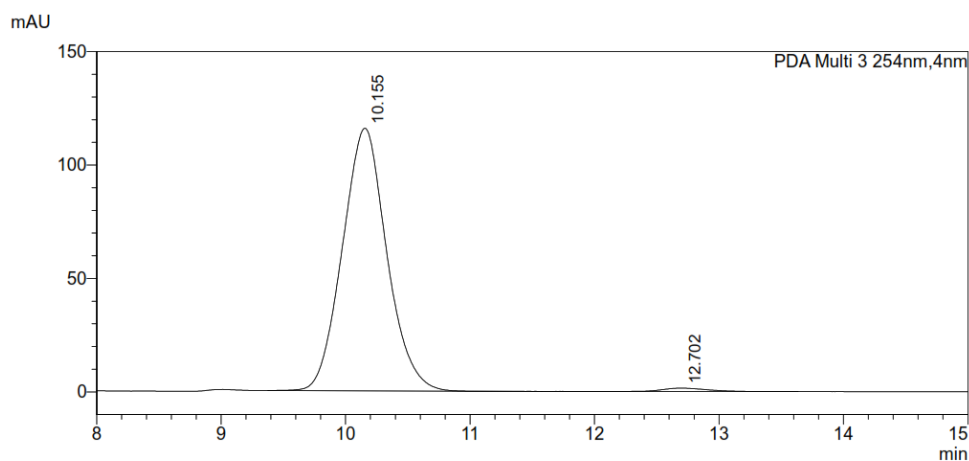

<Peak Table>

PDA Ch3 254nm

| Peak# | Ret. Time | Area%   |
|-------|-----------|---------|
| 1     | 10.155    | 98.726  |
| 2     | 12.702    | 1.274   |
| Total |           | 100.000 |

(+)-Ethyl (S)-1-((S)-4'-(benzylamino)-1'-bromo-1',1'-difluoro-4'-oxobutan-2'-yl)-2-oxocyclopentane-1-carboxylate (1S,2'S)-11

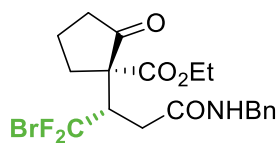

(1S,2'S)-11



The title compound was prepared according to **General Procedure 2**. A mixture of 4-nitrophenyl (*E*)-4-bromo-4,4-difluorobut-2-enoate **S2** (32.1 mg, 0.1 mmol), (2*S*,3*R*)-HyperBTM **1** (1.5 mg, 5  $\mu$ mol) and methyl 2-oxocyclopentane-1-carboxylate **7** (15  $\mu$ L, 0.1 mmol) in DMA (0.4 mL) was stirred for 16 h at room temperature. Benzylamine (11  $\mu$ L, 0.1 mmol) was added, and the reaction was permitted to stir for 1 h. The solution was diluted with EtOAc, washed sequentially with saturated aqueous Na<sub>2</sub>CO<sub>3</sub> ( $\times$ 3), brine, dried over MgSO<sub>4</sub> and filtered. The solvent was removed under reduced pressure and the residue was purified by column chromatography (1:4 EtOAc:Hexane) to give the title compound (19.7 mg, 44%, >95:5 d.r.) as white solid.

*Data for (1*S*,2'*S*)-11*: mp 47-52 °C;  $[\alpha]_D^{20} +11.38$  (*c* 0.65 in CHCl<sub>3</sub>); IR  $\nu_{\max}$  (film) / cm<sup>-1</sup> 3383, 3306, 2978, 1755, 1722, 1653, 1541, 1225, 1101, 987, 822; <sup>1</sup>H NMR (500 MHz, CDCl<sub>3</sub>)  $\delta_H$ : 1.23 (3H, t, *J* 7.1, CH<sub>3</sub>), 1.83-1.95 (1H, m, COCH<sub>2</sub>CH<sub>A</sub>H<sub>B</sub>), 2.04 (1H, app dtdd, *J* 13.4, 7.2, 5.9, 4.1, COCH<sub>2</sub>CH<sub>A</sub>H<sub>B</sub>), 2.18 (1H, ddd, *J* 13.8, 9.6, 6.8, CCH<sub>A</sub>H<sub>B</sub>CH<sub>2</sub>), 2.29-2.42 (2H, m, COCH<sub>2</sub>CH<sub>2</sub>), 2.66 (1H, dd, *J* 16.8, 5.1, CHCH<sub>A</sub>H<sub>B</sub>CONH), 2.71 (1H, *J* 13.8, 7.2, 4.0, CCH<sub>A</sub>H<sub>B</sub>CH<sub>2</sub>), 2.88 (1H, dd, *J* 16.7, 5.3, CHCH<sub>A</sub>H<sub>B</sub>CONH), 4.03 (1H, app dtd, *J* 22.6, 5.2, 2.6, CHCH<sub>2</sub>CONH), 4.07 (1H, dq, *J* 10.7, 7.1, OCH<sub>A</sub>H<sub>B</sub>CH<sub>3</sub>), 4.12 (1H, dq, *J* 10.7, 7.1, OCH<sub>A</sub>H<sub>B</sub>CH<sub>3</sub>), 4.42 (1H, dd, *J* 14.9, 5.6, NHCH<sub>A</sub>H<sub>B</sub>Bn), 4.46 (1H, dd, *J* 14.9, 5.6, NHCH<sub>A</sub>H<sub>B</sub>Bn) 6.00 (1H, app t, *J* 5.6, NH), 7.25-7.31 (3H, m, PhC<sup>2,4,6</sup>H), 7.31-7.36 (2H, m, PhC<sup>3,5</sup>H); <sup>13</sup>C{<sup>1</sup>H} NMR (126 MHz, CDCl<sub>3</sub>)  $\delta_C$ : 13.9 (OCH<sub>2</sub>CH<sub>3</sub>), 19.5 (COCH<sub>2</sub>CH<sub>2</sub>), 31.1 (app t, *J* 2.9, CCH<sub>2</sub>CH<sub>2</sub>), 34.7 (CHCH<sub>2</sub>CONH), 37.6 (COCH<sub>2</sub>CH<sub>2</sub>), 44.1 (NHCH<sub>2</sub>Ph), 51.6 (app t, *J* 18.6, CHCH<sub>2</sub>CONH), 61.6 (CCH<sub>2</sub>CH<sub>2</sub>), 62.6 (OCH<sub>2</sub>CH<sub>3</sub>), 123.9 (app t, *J* 311.6, CF<sub>2</sub>Br), 127.7 (PhC<sup>4</sup>H), 128.0 (PhC<sup>2,6</sup>H), 128.8 (PhC<sup>3,5</sup>H), 138.1 (PhC<sup>1</sup>), 168.4 (COOEt), 169.3 (CONH), 210.7 (COCH<sub>2</sub>CH<sub>2</sub>); <sup>19</sup>F NMR (471 MHz, CDCl<sub>3</sub>)  $\delta_F$ : -45.41 (1F, dd, *J* 158.2, 22.7, CF<sub>A</sub>F<sub>B</sub>Br), -40.49 (1F, d, *J* 158.3, CF<sub>A</sub>F<sub>B</sub>Br); HRMS (ESI<sup>+</sup>) C<sub>19</sub>H<sub>23</sub>F<sub>3</sub>O<sub>4</sub>NBr [M+H]<sup>+</sup> found 446.0768, requires 446.0779 (-1.2 ppm).

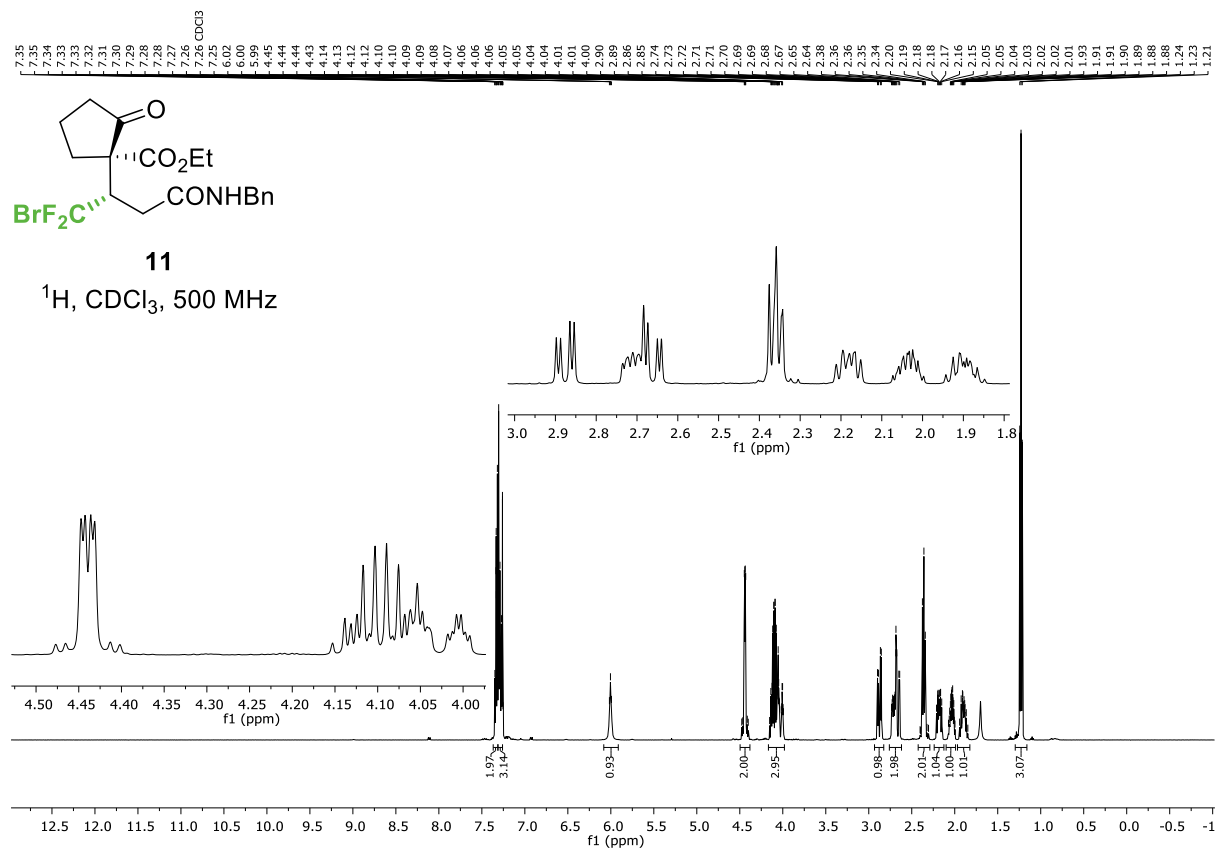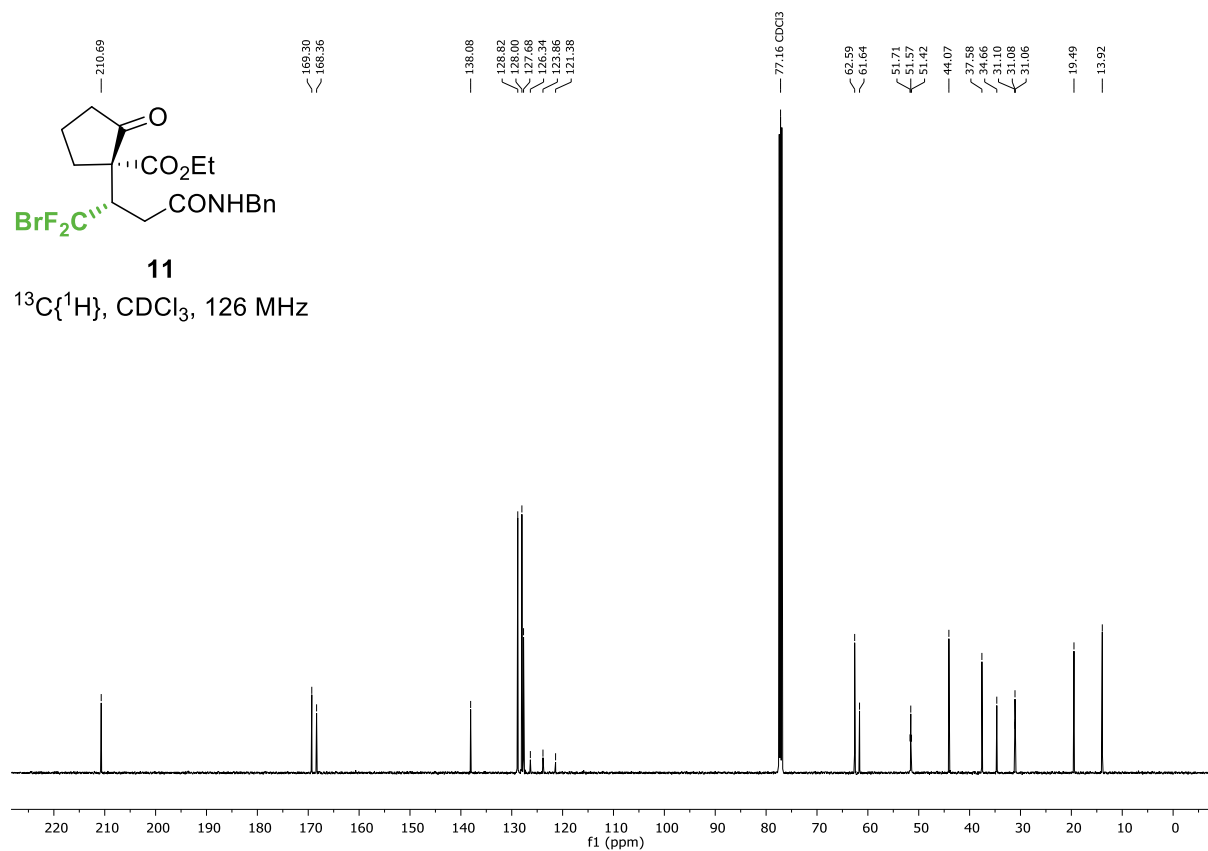

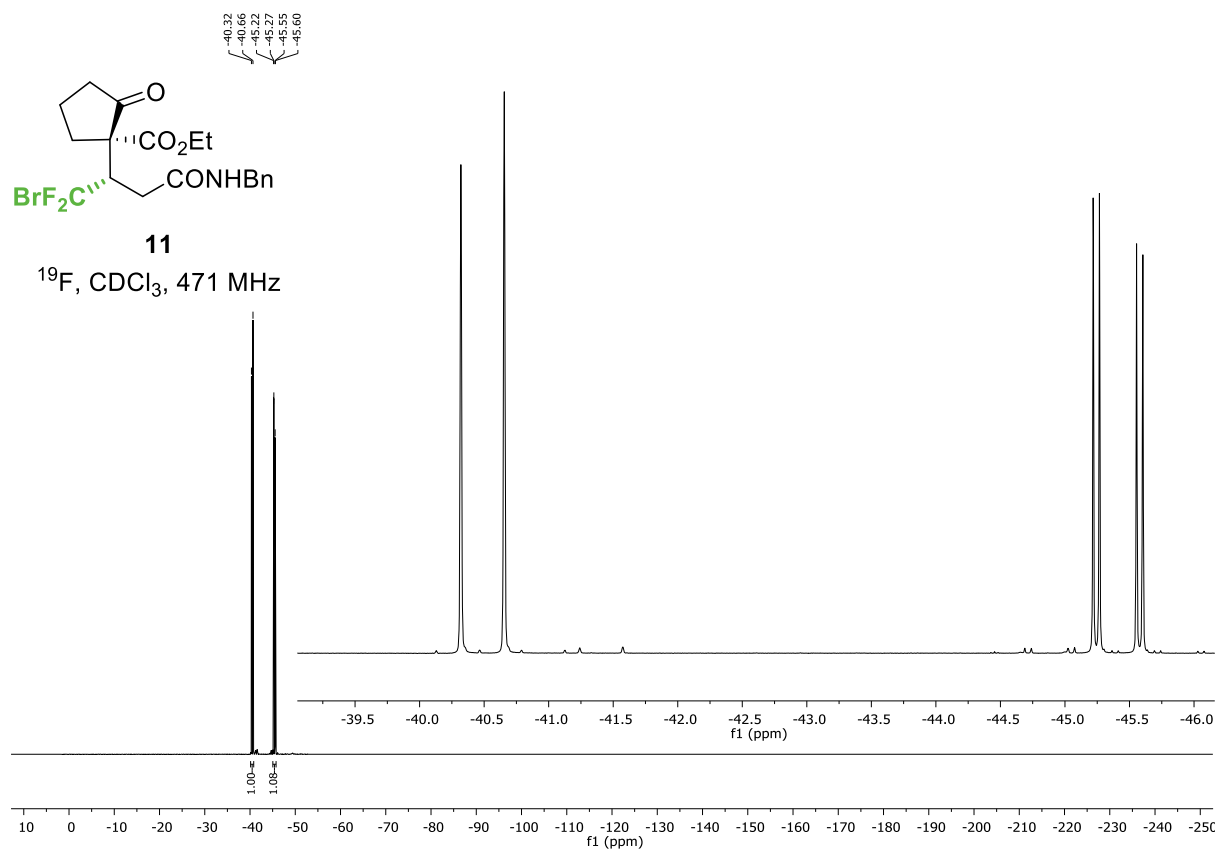

**HPLC Data for 11:** Chiralpak AD-H (90:10 hexane:<sup>i</sup>PrOH, flow rate 1.00 mL·min<sup>-1</sup>, 211 nm, 30 °C)

$t_R$  (1*S*,2'*S*): 10.5 min,  $t_R$  (1*R*,2'*R*): 13.6 min, 99:1 er.

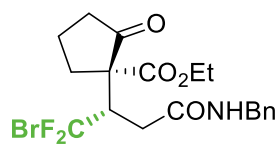

(1*S*,2'*S*)-**11**

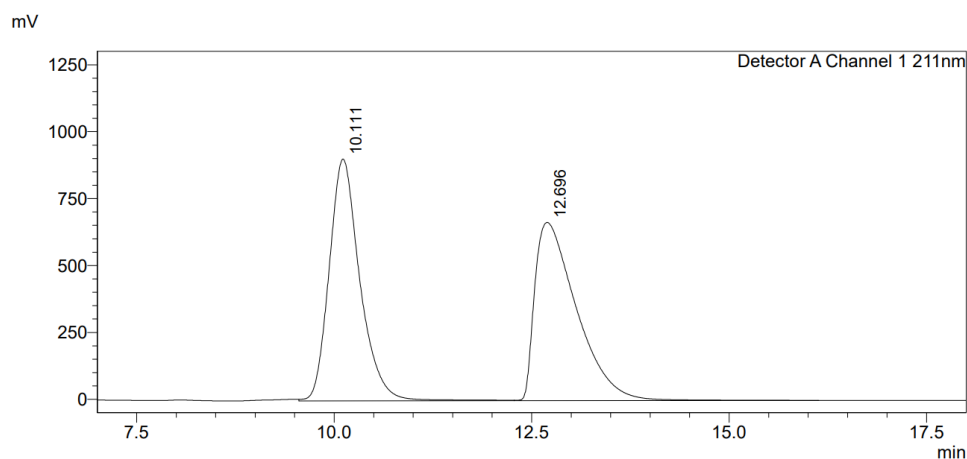

**<Peak Table>**

| Detector A Channel 1 211nm |           |         |
|----------------------------|-----------|---------|
| Peak#                      | Ret. Time | Area%   |
| 1                          | 10.111    | 49.900  |
| 2                          | 12.696    | 50.100  |
| Total                      |           | 100.000 |

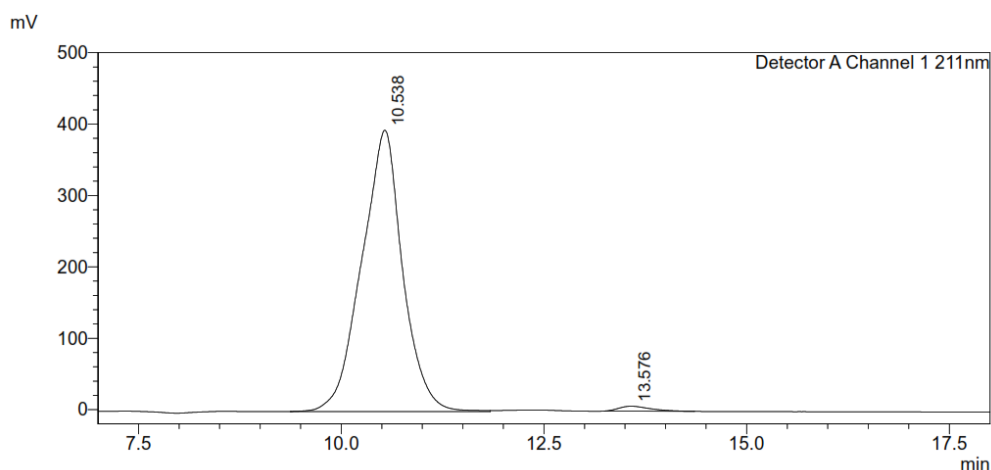

**<Peak Table>**

| Detector A Channel 1 211nm |           |         |
|----------------------------|-----------|---------|
| Peak#                      | Ret. Time | Area%   |
| 1                          | 10.538    | 98.681  |
| 2                          | 13.576    | 1.319   |
| Total                      |           | 100.000 |

(-)-Ethyl (S)-1-((S)-5-(benzylamino)-1,1,1,2,2-pentafluoro-5-oxopentan-3-yl)-2-oxocyclopentane-1-carboxylate (1*S*,3'*S*)-**12**

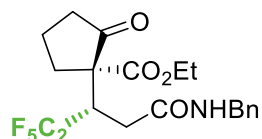

(1*S*,3'*S*)-**12**

The title compound was prepared according to **General Procedure 2**. A mixture of 4-nitrophenyl (*E*)-4,4,5,5,5-pentafluoropent-2-enoate **S3** (31.1mg, 0.1 mmol), (2*S*,3*R*)-HyperBTM **1** (1.5 mg, 5 μmol) and

methyl 2-oxocyclopentane-1-carboxylate **7** (15  $\mu$ L, 0.1 mmol) in DMA (0.4 mL) was stirred for 16 h at room temperature. Benzylamine (11  $\mu$ L, 0.1 mmol) was then added, and the reaction was permitted to stir for 1 h. The solution was diluted with EtOAc, washed sequentially with saturated aqueous  $\text{Na}_2\text{CO}_3$  ( $\times 3$ ) and brine, dried over  $\text{MgSO}_4$  and filtered. The solvent was removed under reduced pressure and the residue was purified by column chromatography (1:4 EtOAc:Hexane) to give the title compound (16.3 mg, 37%, 93:7 d.r.), as a colourless oil.

*Data for (1S,3'S)-12*:  $[\alpha]_D^{20}$   $-3.49$  ( $c$  0.43 in  $\text{CHCl}_3$ ); **IR**  $\nu_{\text{max}}$  (film) /  $\text{cm}^{-1}$  3308, 2967, 1757, 1724, 1655, 1541, 1182, 1125, 1001, 934, 858;  **$^1\text{H}$  NMR** (500 MHz,  $\text{CDCl}_3$ )  $\delta_{\text{H}}$ : 1.23 (3H, t,  $J$  7.1,  $\text{OCH}_2\text{CH}_3$ ), 1.95-2.05 (1H, m,  $\text{COCH}_2\text{CH}_A\text{H}_B$ ), 2.05-2.17 (3H, m,  $\text{CCH}_A\text{H}_B\text{CH}_2$ ,  $\text{COCH}_2\text{CH}_A\text{H}_B$ ), 2.33 (1H, ddd,  $J$  18.6, 8.8, 5.5,  $\text{COCH}_A\text{H}_B\text{CH}_2$ ), 2.42 (1H, app dt,  $J$  18.6, 8.3,  $\text{COCH}_A\text{H}_B\text{CH}_2$ ), 2.58 (1H, d (br),  $J$  17.4,  $\text{CHCH}_A\text{H}_B\text{CONH}$ ), 2.68-2.78 (1H, m,  $\text{CCH}_A\text{H}_B\text{CH}_2$ ), 2.86 (1H, dd,  $J$  17.4, 7.1,  $\text{CHCH}_A\text{H}_B\text{CONH}$ ), 3.89 (1H, app ddt,  $J$  27.2, 6.8, 3.0,  $\text{CHCH}_2\text{CONH}$ ), 4.10 (1H, dq,  $J$  10.7, 7.1,  $\text{OCH}_A\text{H}_B\text{CH}_3$ ), 4.14 (1H, dq,  $J$  10.7, 7.1,  $\text{OCH}_A\text{H}_B\text{CH}_3$ ), 4.38 (1H, dd,  $J$  14.8, 5.7,  $\text{NHCH}_A\text{H}_B\text{Ph}$ ), 4.42 (1H, dd,  $J$  14.8, 5.7,  $\text{NHCH}_A\text{H}_B\text{Ph}$ ), 5.74 (1H, app t,  $J$  5.7,  $\text{NH}$ ), 7.25-7.30 (3H, m,  $\text{PhC}^{2,4,6}\text{H}$ ), 7.30-7.37 (2H, m,  $\text{PhC}^{3,5}\text{H}$ );  **$^{13}\text{C}\{^1\text{H}\}$  NMR** (126 MHz,  $\text{CDCl}_3$ )  $\delta_{\text{C}}$ : 13.9 ( $\text{OCH}_2\text{CH}_3$ ), 19.5 ( $\text{COCH}_2\text{CH}_2$ ), 32.4 and 32.5 ( $\text{CHCH}_2\text{CONH}$ ,  $\text{CCH}_2\text{CH}_2$ ), 37.7 ( $\text{COCH}_2\text{CH}_2$ ), 39.6 (app t,  $J$  18.4,  $\text{CHCH}_2\text{CONH}$ ), 44.1 ( $\text{NHCH}_2\text{Ph}$ ), 61.0 (q,  $J$  2.4,  $\text{CCH}_2\text{CH}_2$ ), 62.4 ( $\text{OCH}_2\text{CH}_3$ ), 115.8 (ddq,  $J$  262.1, 258.0, 36.8,  $\text{CF}_2\text{CF}_3$ ), 119.0 (app qt,  $J$  286.9, 37.2,  $\text{CF}_2\text{CF}_3$ ), 127.7 ( $\text{PhC}^4\text{H}$ ), 128.0 ( $\text{PhC}^{2,6}\text{H}$ ), 128.9 ( $\text{PhC}^{3,5}\text{H}$ ), 138.0 ( $\text{PhC}^1$ ), 169.1<sub>7</sub> and 169.2<sub>1</sub> ( $\text{COOEt}$ ,  $\text{CONH}$ ), 211.7 ( $\text{COCH}_2\text{CH}_2$ );  **$^{19}\text{F}$  NMR** (471 MHz,  $\text{CDCl}_3$ )  $\delta_{\text{F}}$ :  $-114.5$  (1F, dd,  $J$  271.9, 27.1,  $\text{CF}_A\text{F}_B\text{CF}_3$ ),  $-110.84$  (1F, d,  $J$  271.7,  $\text{CF}_A\text{F}_B\text{CF}_3$ ),  $-85.10$  (3F, s,  $\text{CF}_3$ ); **HRMS** ( $\text{ESI}^+$ )  $\text{C}_{20}\text{H}_{23}\text{F}_5\text{O}_4\text{N}$   $[\text{M}+\text{H}]^+$  found 436.1535, requires 436.1542 ( $-1.6$  ppm).



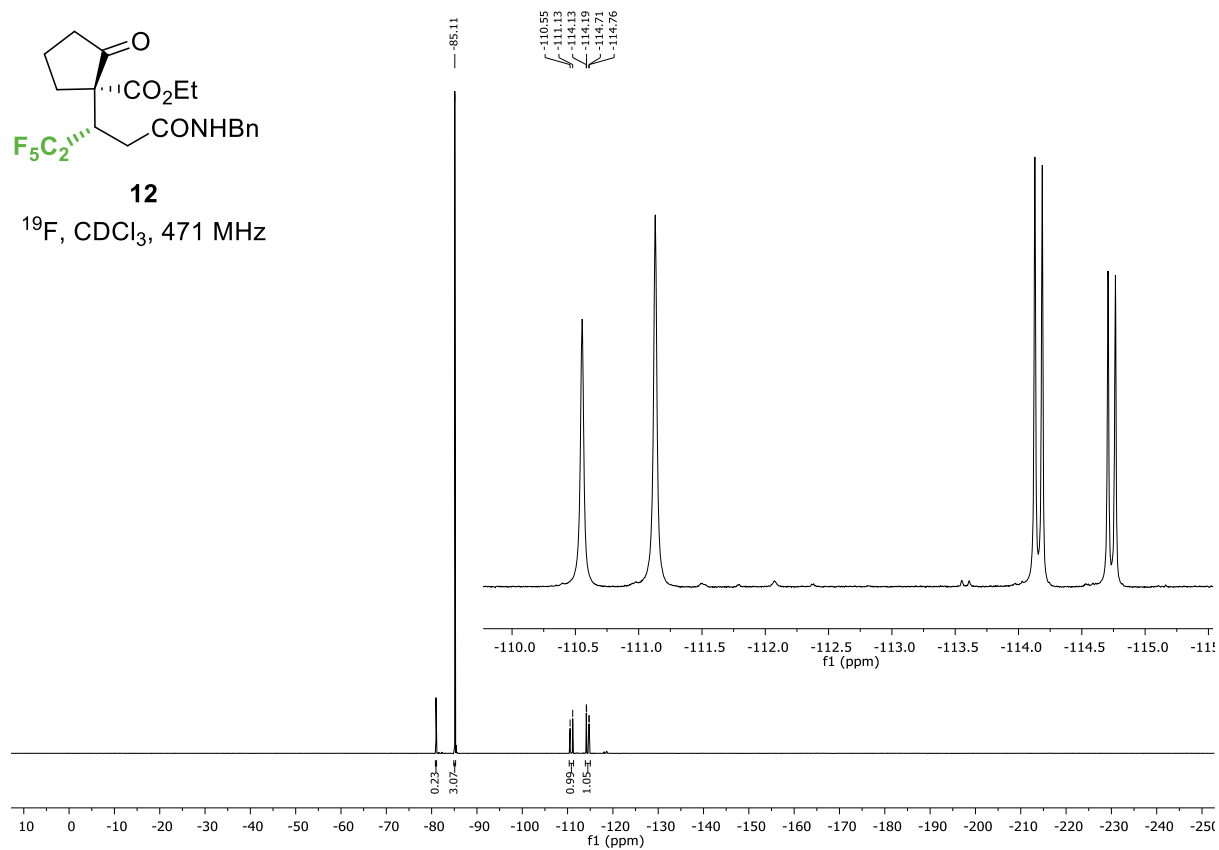

**HPLC Data for 12:** Chiralpak AD-H (95:5 hexane:*i*PrOH, flow rate  $1.00 \text{ mL} \cdot \text{min}^{-1}$ , 211 nm,  $30 \text{ }^\circ\text{C}$ )  $t_{\text{R}}$   
 (1*R*,3'*R*): 9.4 min,  $t_{\text{R}}$  (1*S*,3'*S*): 12.2 min, 99:1 er.

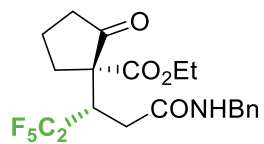

**(1*S*,3'*S*)-12**

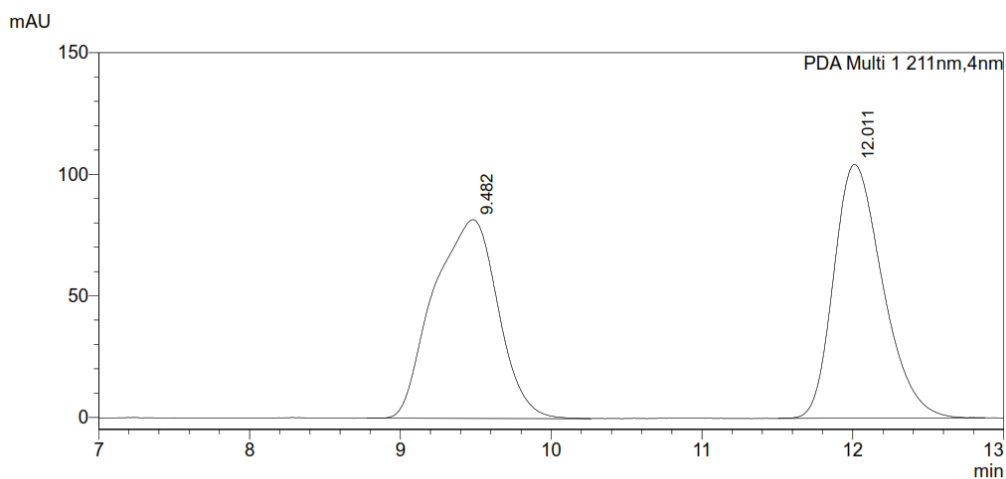

<Peak Table>

| PDA Ch1 211nm |           |         |
|---------------|-----------|---------|
| Peak#         | Ret. Time | Area%   |
| 1             | 9.482     | 50.849  |
| 2             | 12.011    | 49.151  |
| Total         |           | 100.000 |

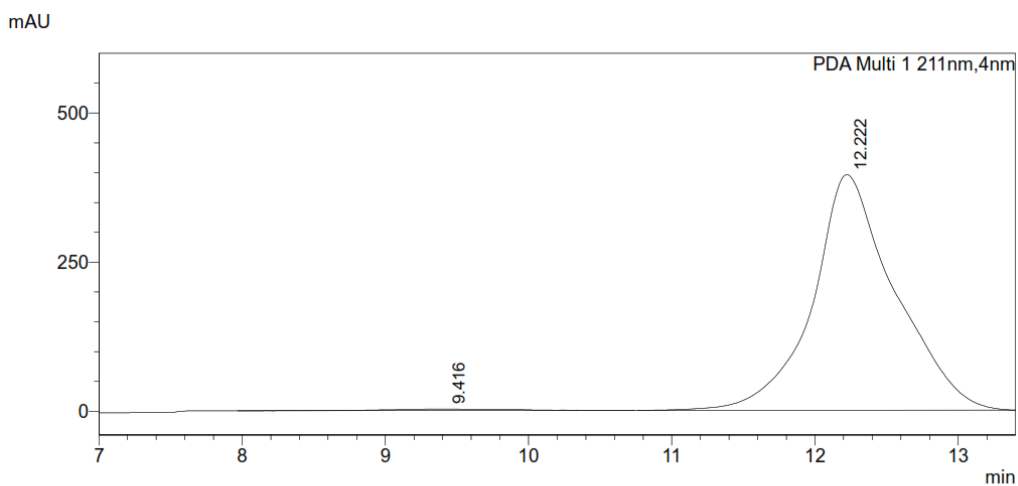

<Peak Table>

| PDA Ch1 211nm |           |         |
|---------------|-----------|---------|
| Peak#         | Ret. Time | Area%   |
| 1             | 9.416     | 1.006   |
| 2             | 12.222    | 98.994  |
| Total         |           | 100.000 |

(+)-Ethyl (S)-1-((S)-4'-(benzylamino)-1'-ethoxy-1',4'-dioxobutan-2'-yl)-2-oxocyclopentane-1-carboxylate (1S,2'S)-13

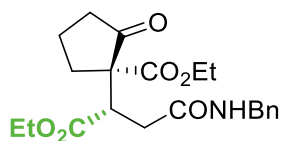

(1S,2'S)-13



### Preparation from fumarate:

The title compound was prepared according to **General Procedure 2**. A mixture of ethyl 4-nitrophenyl fumarate **26** (26.5 mg, 0.1 mmol), (2*S*,3*R*)-HyperBTM **8** (1.5 mg, 5  $\mu$ mol) and methyl 2-oxocyclopentane-1-carboxylate **7** (15  $\mu$ L, 0.1 mmol) in DMA (0.4 mL) was stirred for 16 h at room temperature. Benzylamine (11  $\mu$ L, 0.1 mmol) was added and the reaction was permitted to stir for 1 h. The solution was diluted with EtOAc, washed sequentially with saturated aqueous Na<sub>2</sub>CO<sub>3</sub> ( $\times$ 3) and brine, dried over MgSO<sub>4</sub> and filtered. The solvent was removed under reduced pressure and the residue was purified by column chromatography (1:4 EtOAc:Hexane) to give the title compound (20.2 mg, 52%, >95:5 d.r.) as colourless oil.

### Preparation from maleate:

The title compound was prepared according to **General Procedure 2**. A mixture of ethyl (4-nitrophenyl) maleate **24** (26.5 mg, 0.1 mmol), (2*S*,3*R*)-HyperBTM **1** (1.5 mg, 5  $\mu$ mol) and methyl 2-oxocyclopentane-1-carboxylate **7** (15  $\mu$ L, 0.1 mmol) in DMA (0.4 mL) was stirred for 16 h at room temperature. Benzylamine (11  $\mu$ L, 0.1 mmol) was added, and the reaction was permitted to stir for 1 h. The solution was diluted with EtOAc, washed sequentially with saturated aqueous Na<sub>2</sub>CO<sub>3</sub> ( $\times$ 3) and brine, dried over MgSO<sub>4</sub> and filtered. The solvent was removed under reduced pressure and the residue was purified by column chromatography (1:4 EtOAc:Hexane) to give the title compound in two fractions (major diastereomer: 15.9 mg, 41% as a colourless oil, and minor diastereomer: 5.6 mg, 14% as a colourless oil); combined (21.5 mg, 55%, 74:26 d.r.).

*Data for major diastereomer (1*S*,2'*S*)-13:  $[\alpha]_D^{20}$  +22.31 (*c* 0.65 in CHCl<sub>3</sub>); IR  $\nu_{\max}$  (film) / cm<sup>-1</sup> 3391, 3306, 2978, 1721, 1651, 1539, 1221, 1155, 1026, 916, 820; <sup>1</sup>H NMR (500 MHz, CDCl<sub>3</sub>)  $\delta_H$ : 1.19 (3H, t, *J* 7.1, CHCOOCH<sub>2</sub>CH<sub>3</sub>), 1.23 (3H, t, *J* 7.1, CCOOCH<sub>2</sub>CH<sub>3</sub>), 1.94-2.07 (2H, m, COCH<sub>2</sub>CH<sub>2</sub>), 2.25 (1H, ddd, *J* 13.4, 9.4, 7.6, CCH<sub>A</sub>H<sub>B</sub>CH<sub>2</sub>), 2.32-2.44 (2H, m, COCH<sub>2</sub>CH<sub>2</sub>), 2.50 (1H, ddd, *J* 13.4, 7.1, 4.0, CCH<sub>A</sub>H<sub>B</sub>CH<sub>2</sub>), 2.60 (1H, dd, *J* 15.4, 7.7, CHCH<sub>A</sub>H<sub>B</sub>CONH), 2.64 (1H, dd, *J* 15.4, 4.9, CHCH<sub>A</sub>H<sub>B</sub>CONH), 3.77 (1H, dd, *J* 7.7, 4.8, CHCH<sub>2</sub>CONH), 4.08 (1H, dq, *J* 10.8, 7.1, CHCOOCH<sub>A</sub>H<sub>B</sub>CH<sub>3</sub>), 4.10 (1H, dq, *J* 10.8, 7.1, CHCOOCH<sub>A</sub>H<sub>B</sub>CH<sub>3</sub>), 4.14 (2H, q, *J* 7.1, CCOOCH<sub>2</sub>CH<sub>3</sub>), 4.39 (1H, dd, *J* 15.2, 5.7, NHCH<sub>A</sub>H<sub>B</sub>Ph), 4.42 (1H, dd, *J* 15.2, 5.7, NHCH<sub>A</sub>H<sub>B</sub>Ph), 6.05 (1H, app t, *J* 5.7, NH), 7.23-7.29 (3H, m, PhC<sup>2,4,6</sup>H), (2H, m, PhC<sup>3,5</sup>H); <sup>13</sup>C{<sup>1</sup>H} NMR (126 MHz, CDCl<sub>3</sub>)  $\delta_C$ : 14.1 (CCOOCH<sub>2</sub>CH<sub>3</sub>, CHCOOCH<sub>2</sub>CH<sub>3</sub>), 19.7 (OCH<sub>2</sub>CH<sub>2</sub>), 31.4 (CCH<sub>2</sub>CH<sub>2</sub>), 35.2 (CHCH<sub>2</sub>CONH), 37.9 (COCH<sub>2</sub>CH<sub>2</sub>), 43.8 (NHCH<sub>2</sub>Ph), 44.9 (CHCH<sub>2</sub>CONH), 61.4 (CHCOOCH<sub>2</sub>CH<sub>3</sub>), 61.9<sub>6</sub> (CCH<sub>2</sub>CH<sub>2</sub>), 62.0<sub>4</sub> (CCOOCH<sub>2</sub>CH<sub>3</sub>), 127.5 (PhC<sup>4</sup>H), 127.9 (PhC<sup>2,6</sup>H), 128.7 (PhC<sup>3,5</sup>H), 138.3*

(PhC<sup>1</sup>), 170.0 (CCOOEt), 170.5 (CONHBn), 172.4 (CHCOOEt), 213.2 (COCH<sub>2</sub>CH<sub>2</sub>); **HRMS** (ESI<sup>+</sup>) C<sub>21</sub>H<sub>28</sub>O<sub>6</sub>N [M+H]<sup>+</sup> found 390.1914, requires 390.1917 (+0.8 ppm).

*Data for minor diastereoisomer (1R,2'S)-13: [α]<sub>D</sub><sup>20</sup> +18.3 (c 0.47 in CHCl<sub>3</sub>); IR ν<sub>max</sub> (film) / cm<sup>-1</sup> 3242, 3067, 2972, 1719, 1641, 1557, 1213, 1153, 1026, 941, 860; <sup>1</sup>H NMR (500 MHz, CDCl<sub>3</sub>) δ<sub>H</sub>: 1.21 (3H, t, *J* 7.2, CHCOOCH<sub>2</sub>CH<sub>3</sub>), 1.26 (3H, t, *J* 7.1, COOCH<sub>2</sub>CH<sub>3</sub>), 1.90-2.00 (1H, m, COCH<sub>2</sub>CH<sub>2</sub>), 2.04 (1H, app dt, *J* 13.1, 8.9, CCH<sub>A</sub>H<sub>B</sub>), 2.24 (1H, app dt, *J* 18.9, 9.4, COCH<sub>A</sub>H<sub>B</sub>CH<sub>2</sub>), 2.36-2.46 (1H, m, COCH<sub>A</sub>H<sub>B</sub>CH<sub>2</sub>), 2.38 (1H, dd, *J* 14.9, 4.0, CHCH<sub>A</sub>H<sub>B</sub>CONH), 2.44-2.53 (1H, m, CCH<sub>A</sub>H<sub>B</sub>CH<sub>2</sub>), 2.67 (1H, dd, *J* 14.9, 10.1, CHCH<sub>A</sub>H<sub>B</sub>CONH), 3.73 (1H, dd, *J* 10.1, 3.9, CHCH<sub>2</sub>CONH), 4.17 (2H, q, *J* 7.1, CCOOCH<sub>2</sub>CH<sub>3</sub>), 4.13 (1H, dq, *J* 10.8, 7.2, CHCOOCH<sub>A</sub>H<sub>B</sub>CH<sub>3</sub>), 4.09 (1H, dq, *J* 10.8, 7.2, CHCOOCH<sub>A</sub>H<sub>B</sub>CH<sub>3</sub>), 4.39 (1H, dd, *J* 15.0, 5.6, NHCH<sub>A</sub>H<sub>B</sub>), 4.42 (1H, dd, *J* 15.0, 5.6, NHCH<sub>A</sub>H<sub>B</sub>Ph), 5.94 (1H, app t, *J* 5.4, NH), 7.-25-7.30 (3H, m, PhC<sup>2,4,6</sup>H), 7.30-7.35 (2H, m, PhC<sup>3,5</sup>H); <sup>13</sup>C{<sup>1</sup>H} NMR (126 MHz, CDCl<sub>3</sub>) δ<sub>C</sub>: 14.1 (CCOOCH<sub>2</sub>CH<sub>3</sub>, CHCOOCH<sub>2</sub>CH<sub>3</sub>), 19.5 (COCH<sub>2</sub>CH<sub>2</sub>), 31.4 (CCH<sub>2</sub>CH<sub>2</sub>), 35.3 (CHCH<sub>2</sub>CONH), 38.4 (COCH<sub>2</sub>CH<sub>2</sub>), 43.9 (NHCH<sub>2</sub>Ph), 45.4 (CHCH<sub>2</sub>CONH), 61.4 (CHCOOCH<sub>2</sub>CH<sub>3</sub>), 61.7 (CCH<sub>2</sub>CH<sub>2</sub>), 62.1 (CCOOCH<sub>2</sub>CH<sub>3</sub>), 127.6 (PhC<sup>4</sup>H), 128.0 (PhC<sup>2,6</sup>H), 128.8 (PhC<sup>3,5</sup>H), 138.2 (PhC<sup>1</sup>), 169.9 (CCOOEt), 170.1 (CONHBn), 172.8 (CHCOOEt), 213.2 (COCH<sub>2</sub>CH<sub>2</sub>). **HRMS** (ESI<sup>+</sup>) C<sub>21</sub>H<sub>27</sub>O<sub>6</sub>NNa [M+Na]<sup>+</sup> found 412.1731, requires 412.1721 (-2.3 ppm).*

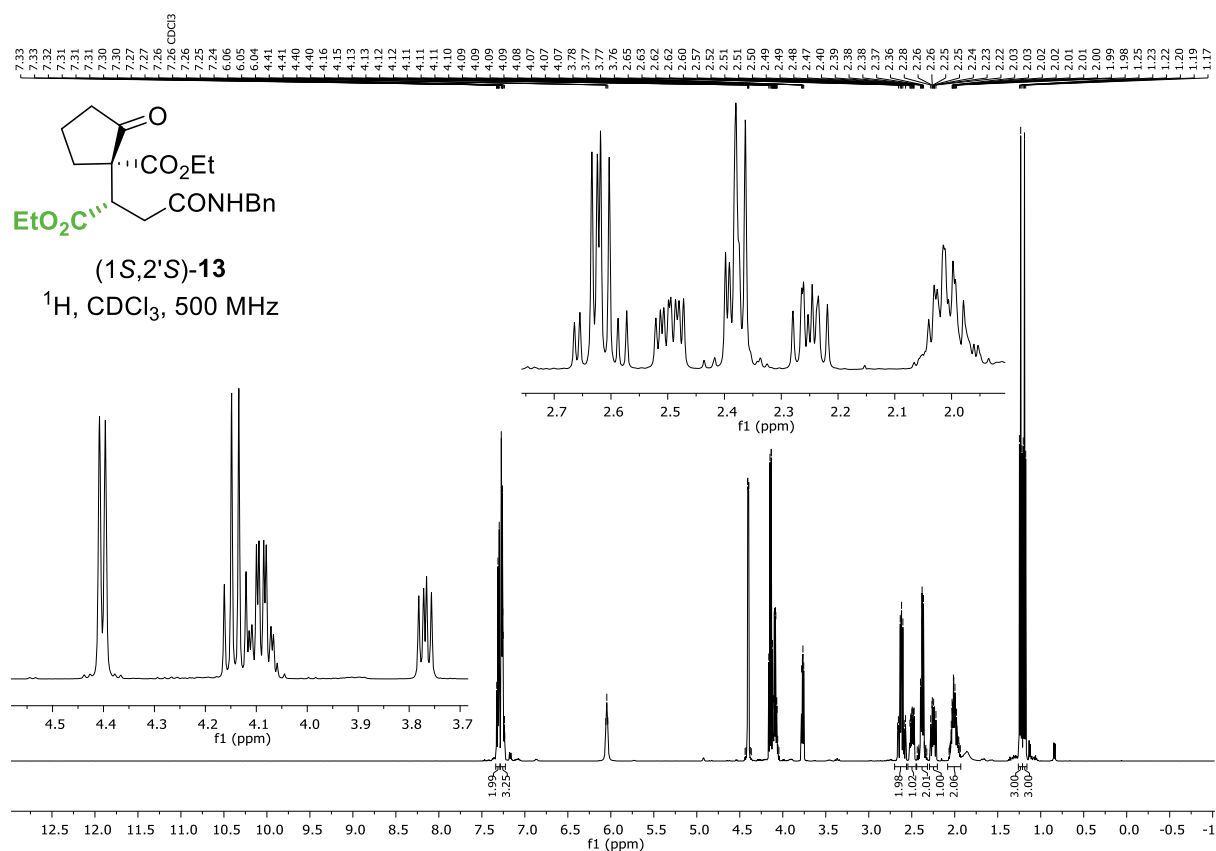

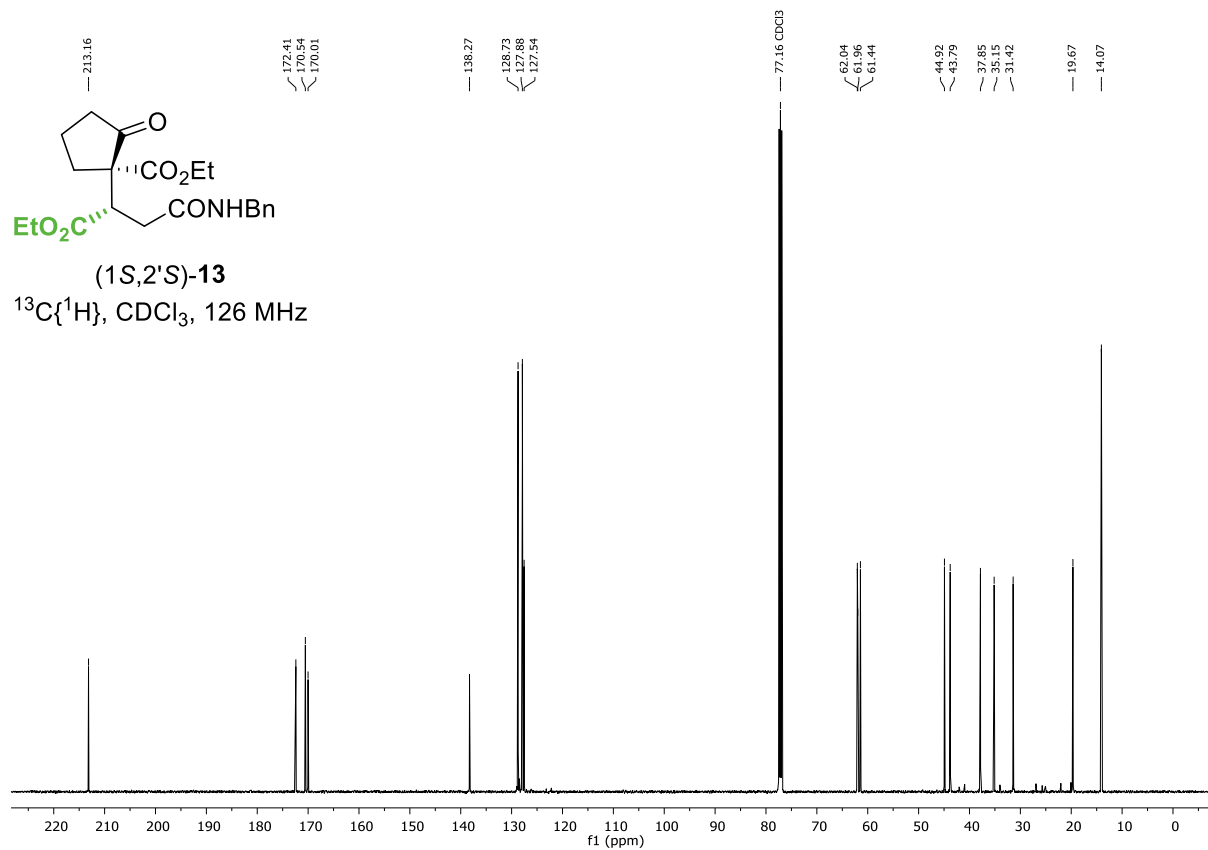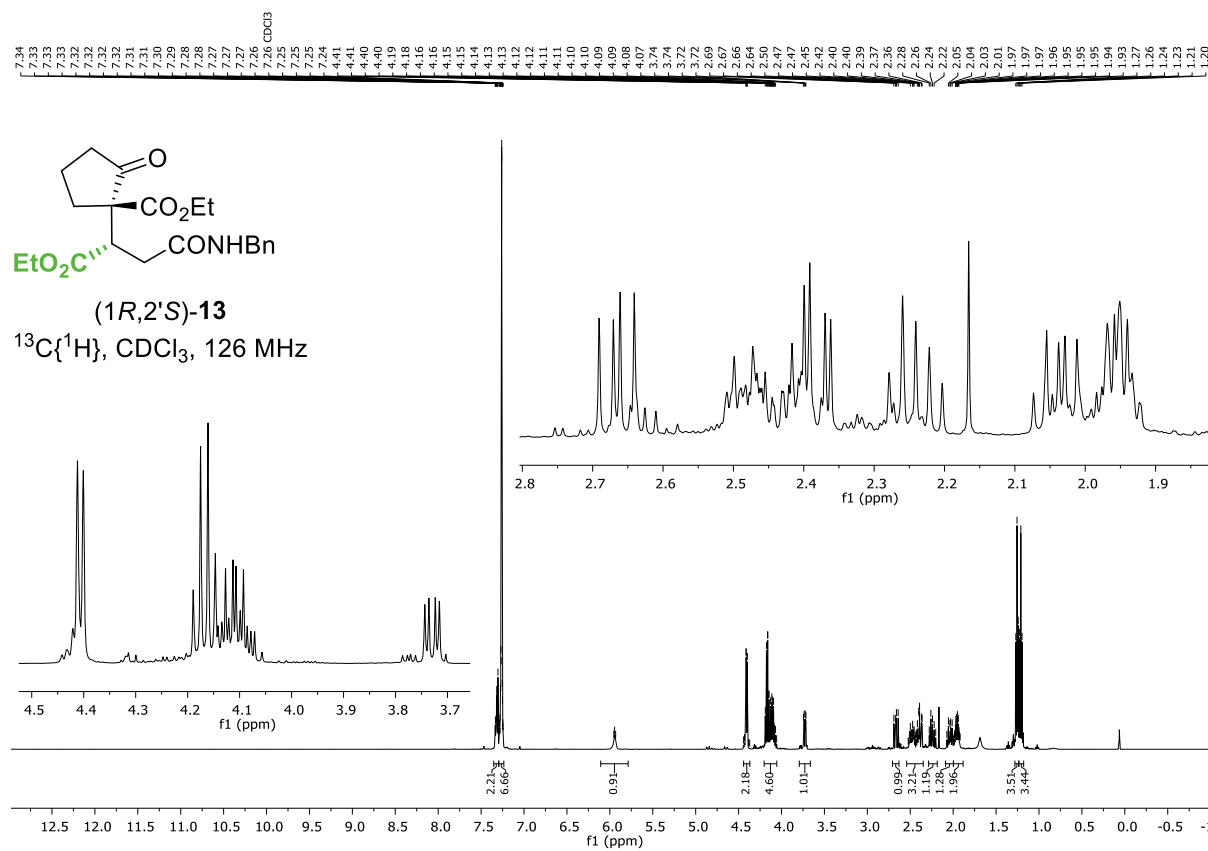

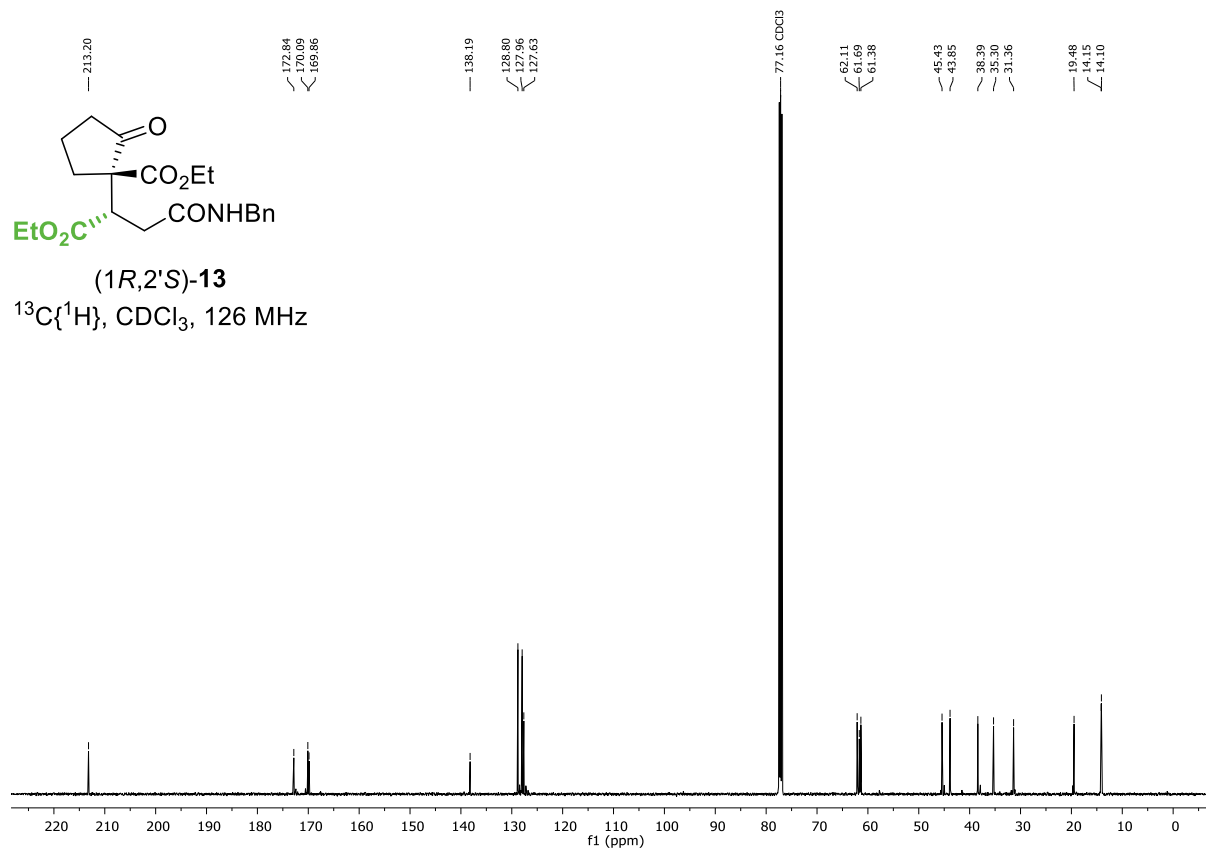

**HPLC Data for 13 from fumarate:** Chiralpak AD-H (90:10 hexane:*i*PrOH, flow rate  $1.00 \text{ mL} \cdot \text{min}^{-1}$ , 211 nm,  $30 \text{ }^\circ\text{C}$ )  $t_{\text{R}}$  (1*R*,2'*R*): 20.4 min,  $t_{\text{R}}$  (1*S*,2'*S*): 22.4 min, 94:6 er.

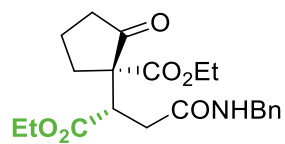

**(1*S*,2'*S*)-13**

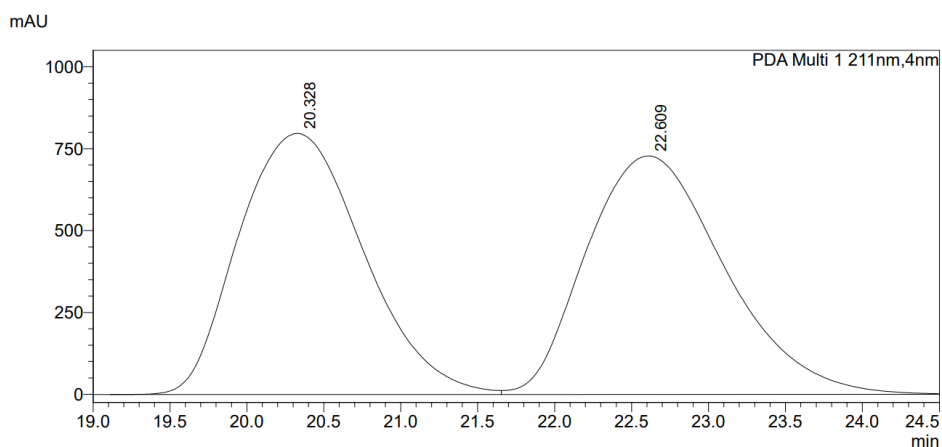

<Peak Table>

| PDA Ch1 211nm |           |         |
|---------------|-----------|---------|
| Peak#         | Ret. Time | Area%   |
| 1             | 20.328    | 49.679  |
| 2             | 22.609    | 50.321  |
| Total         |           | 100.000 |

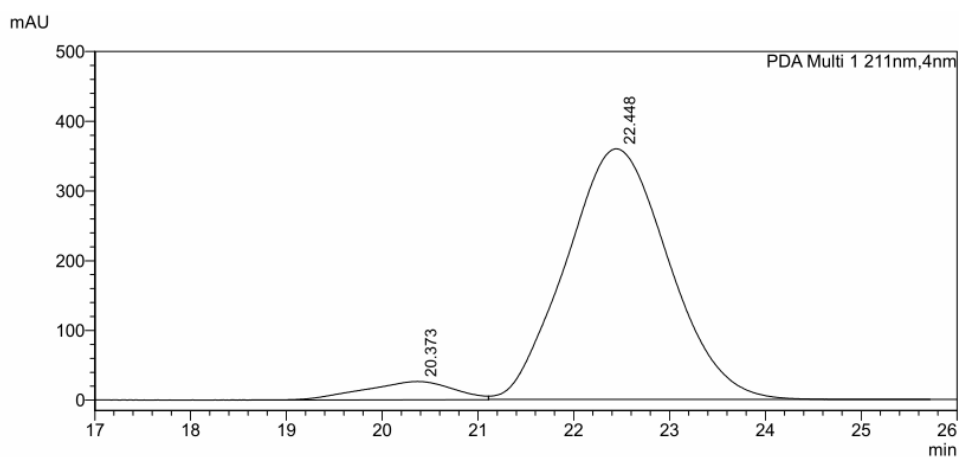

<Peak Table>

| PDA Ch1 211nm |           |         |
|---------------|-----------|---------|
| Peak#         | Ret. Time | Area%   |
| 1             | 20.373    | 5.964   |
| 2             | 22.448    | 94.036  |
| Total         |           | 100.000 |

**HPLC Data for 13 from maleate, major diastereomer:** Chiralpak AD-H (90:10 hexane:PrOH, flow rate 1.00 mL·min<sup>-1</sup>, 211 nm, 30 °C) *t<sub>R</sub>* (1*R*,2'*R*): 20.4 min, *t<sub>R</sub>* (1*S*,2'*S*): 22.6 min, 78:22 er.

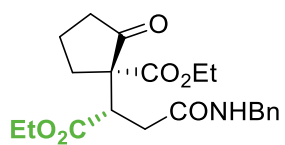

(1*S*,2'*S*)-13

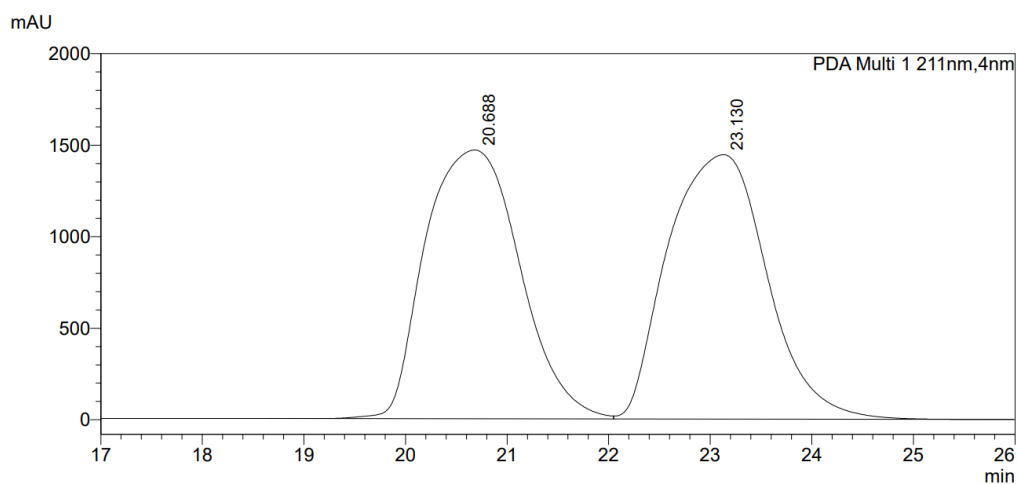

**<Peak Table>**

| PDA Ch1 211nm |           |         |
|---------------|-----------|---------|
| Peak#         | Ret. Time | Area%   |
| 1             | 20.688    | 49.267  |
| 2             | 23.130    | 50.733  |
| Total         |           | 100.000 |

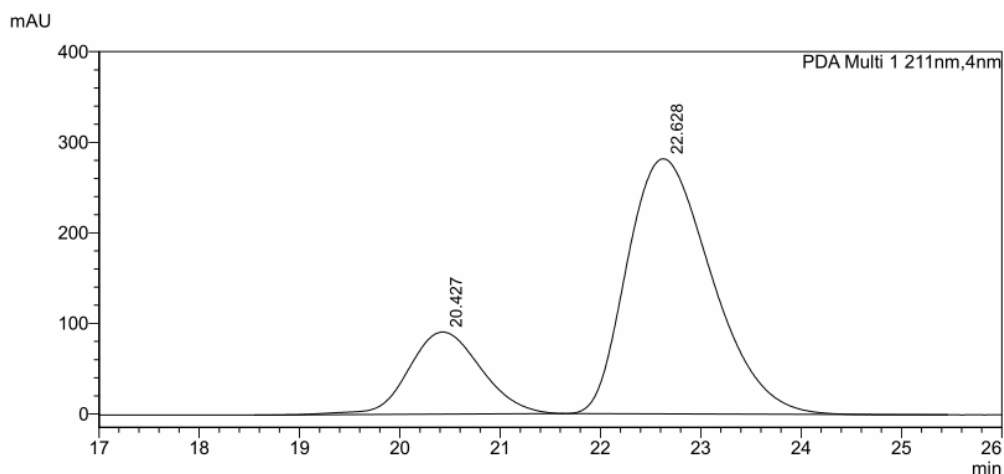

**<Peak Table>**

| PDA Ch1 211nm |           |         |
|---------------|-----------|---------|
| Peak#         | Ret. Time | Area%   |
| 1             | 20.427    | 21.678  |
| 2             | 22.628    | 78.322  |
| Total         |           | 100.000 |

**HPLC Data for 13 from maleate, minor diastereomer:** Chiralpak OD-H (95:5 hexane:IPA, flow rate 1.00 mL·min<sup>-1</sup>, 211 nm, 30 °C) t<sub>R</sub> (major): 65.4 min, t<sub>R</sub> (minor): 78.8 min, 65:35 er.

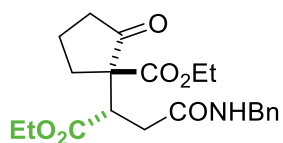

**(1*R*,2'*S*)-13**

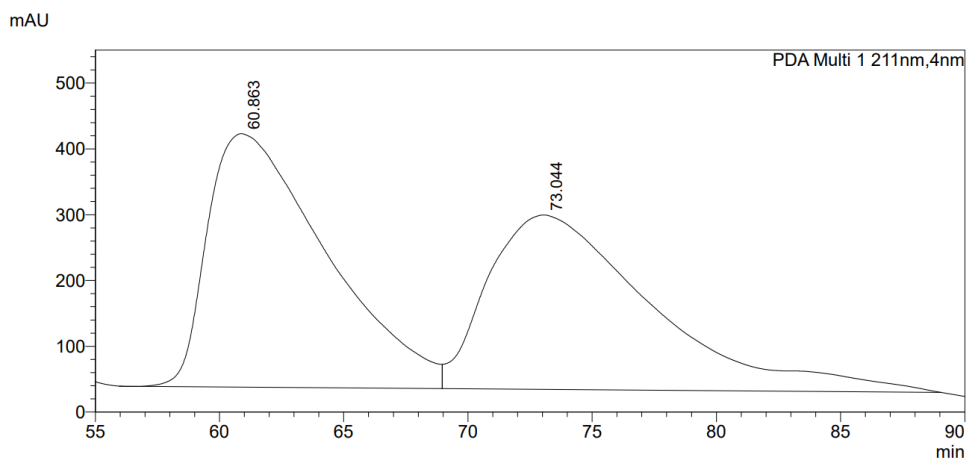

<Peak Table>

PDA Ch1 211nm

| Peak# | Ret. Time | Area%   |
|-------|-----------|---------|
| 1     | 60.863    | 51.165  |
| 2     | 73.044    | 48.835  |
| Total |           | 100.000 |

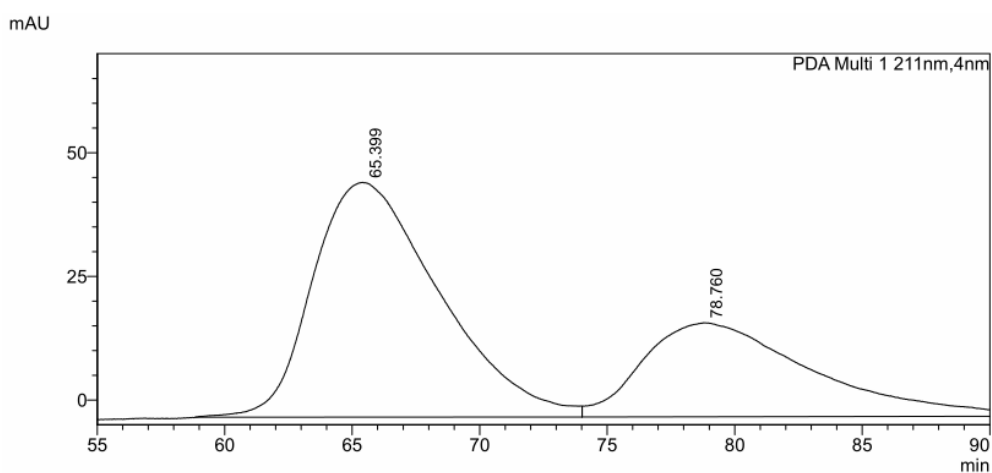

<Peak Table>

PDA Ch1 211nm

| Peak# | Ret. Time | Area%   |
|-------|-----------|---------|
| 1     | 65.399    | 65.107  |
| 2     | 78.760    | 34.893  |
| Total |           | 100.000 |

(+)-1-(*tert*-Butyl) 2-ethyl (*R*)-2-((*S*)-4'-(benzylamino)-1',1',1'-trifluoro-4'-oxobutan-2'-yl)-3-oxopyrrolidine-1,2-dicarboxylate (*2R,2'S*)-14

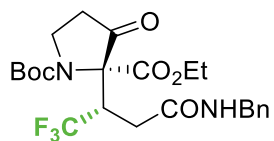

(*2R,2'S*)-14

The title compound was prepared according to **General Procedure 2**. A mixture of (*E*)-4-nitrophenyl (*E*)-4,4,4-trifluorobut-2-enoate **8** (50 mg, 0.19 mmol), (2*S*,3*R*)-HyperBTM **1** (3.0 mg, 9.5  $\mu$ mol) and 1-(*tert*-butyl) 2-ethyl 3-oxopyrrolidine-1,2-dicarboxylate (50 mg, 0.19 mmol) in DMA (0.68 mL) was stirred for 16 h at room temperature. Benzylamine (21  $\mu$ L, 0.19 mmol) was then added, and the reaction was permitted to stir for 1 h. The solution was diluted with Et<sub>2</sub>O, washed sequentially with saturated aqueous Na<sub>2</sub>CO<sub>3</sub> ( $\times$ 3) and brine, dried over MgSO<sub>4</sub> and filtered. The solvent was removed under reduced pressure and the residue was purified by column chromatography (1:3 EtOAc:Hexane) to give a mixture of diastereomers (32.7 mg, 35%, 75:25 d.r.) as a colourless oil.

*Data for 14* (analysed as a 75:25 mixture of diastereomers):  $[\alpha]_D^{20} +31.54$  (*c* 0.26 in CHCl<sub>3</sub>); **IR**  $\nu_{\max}$  (film) / cm<sup>-1</sup> 3033, 2980, 1771, 1697, 1541, 1381, 1368, 1148, 1013, 941, 773; **<sup>1</sup>H NMR** (500 MHz, CDCl<sub>3</sub>, some signals of the minor diastereomer have been obscured by the major and are hence not reported)  $\delta_{\text{H}}$ : 1.20 (0.75H, t, *J* 7.1, OCH<sub>2</sub>CH<sub>3</sub>), 1.23 (2.25H, t, *J* 7.1, OCH<sub>2</sub>CH<sub>3</sub>), 1.45 (6.75H, s, C(CH<sub>3</sub>)<sub>3</sub>), 1.47 (2.25H, s, C(CH<sub>3</sub>)<sub>3</sub>), 2.29 (1H, dd, *J* 16.9, 9.3, CHCH<sub>A</sub>H<sub>B</sub>CONH), 2.69 (1H, ddd, *J* 19.4, 8.9, 5.5, COCH<sub>A</sub>H<sub>B</sub>CH<sub>2</sub>), 2.76 (1H, ddd, *J* 19.4, 9.5, 6.1, COCH<sub>A</sub>H<sub>B</sub>CH<sub>2</sub>), 3.36 (1H, app dt, *J* 16.8, 1.9, CHCH<sub>A</sub>H<sub>B</sub>CONH), 3.62-3.71 (1H, m, CH<sub>2</sub>CH<sub>A</sub>H<sub>B</sub>NBoc), 3.86 (0.25H, app ddd, *J* 10.2, 10.1, 5.6, CH<sub>2</sub>CH<sub>A</sub>H<sub>B</sub>NBoc), 3.92 (0.75H, ddd, *J* 10.3, 10.2, 5.7, CH<sub>2</sub>CH<sub>A</sub>H<sub>B</sub>NBoc), 4.09 (0.25H, dq, *J* 10.8, 7.1, OCH<sub>A</sub>H<sub>B</sub>CH<sub>3</sub>), 4.15 (0.75H, dq, *J* 10.8, 7.1, OCH<sub>A</sub>H<sub>B</sub>CH<sub>3</sub>), 4.18 (0.75H, dq, *J* 10.8, 7.1, OCH<sub>A</sub>H<sub>B</sub>CH<sub>3</sub>), 4.28 (0.25H, *J* 10.8, 7.1, OCH<sub>A</sub>H<sub>B</sub>CH<sub>3</sub>), 4.33 (0.25H, app pent, *J* 10.4, CHCH<sub>2</sub>CONH), 4.36 (0.25H, dd, *J* 14.8, 5.3, NHCH<sub>A</sub>H<sub>B</sub>Ph), 4.44 (0.75H, tdd, *J* 10.5, 9.3, 1.9, CHCH<sub>2</sub>CONH), 4.46 (0.75H, dd, *J* 14.7, 5.6, NHCH<sub>A</sub>H<sub>B</sub>Ph), 4.52 (0.75H, dd, *J* 14.7, 5.7, NHCH<sub>A</sub>H<sub>B</sub>Ph), 4.60 (0.25H, dd, *J* 14.9, 6.5, NHCH<sub>A</sub>H<sub>B</sub>Ph), 5.94 (0.75H, app t, *J* 5.8, NH), 6.32 (0.25H, app t, *J* 6.5, 5.3, NH), 7.23-7.30 (3H, PhC<sup>2,4,6</sup>H), 7.30-7.34 (2H, m, PhC<sup>3,5</sup>H); **<sup>13</sup>C{<sup>1</sup>H} NMR** (126 MHz, CDCl<sub>3</sub>)  $\delta_{\text{C}}$ : 14.1 (OCH<sub>2</sub>CH<sub>3</sub> (major and minor)), 28.2 (C(CH<sub>3</sub>)<sub>3</sub> (major)), 28.3 (C(CH<sub>3</sub>)<sub>3</sub> (minor)), 31.6 (CHCH<sub>2</sub>CONH (major)), 32.0 (CHCH<sub>2</sub>CONH (minor)), 35.3 (CH<sub>2</sub>CH<sub>2</sub>NBoc (major)), 36.1 (CH<sub>2</sub>CH<sub>2</sub>NBoc (minor)), 41.3 (CH<sub>2</sub>CH<sub>2</sub>NBoc (major)), 41.7 (CH<sub>2</sub>CH<sub>2</sub>NBoc (minor)), 42.6 (q, *J* 24.6, CHCH<sub>2</sub>CONH), 43.8 (NHCH<sub>2</sub>Ph (minor)), 43.9 (NHCH<sub>2</sub>Ph (major)), 62.8 (OCH<sub>2</sub>CH<sub>3</sub> (minor)), 62.9 (OCH<sub>2</sub>CH<sub>3</sub> (major)), 68.5<sub>5</sub> (CCOOEt (major)), 68.6<sub>2</sub> (CCOOEt (minor)), 81.7 (C(CH<sub>3</sub>)<sub>3</sub> (minor)), 82.7 (C(CH<sub>3</sub>)<sub>3</sub> (major)), 127.0 (q, *J* 280.9, CF<sub>3</sub>, (major)) 127.4 (PhC<sup>4</sup>H (minor)), 127.6 (PhC<sup>4</sup>H (major)), 127.8 (PhC<sup>2,6</sup>H (minor)), 127.8 (PhC<sup>2,6</sup>H (major)), 128.7 (PhC<sup>3,5</sup>H (minor)), 128.8 (PhC<sup>3,5</sup>H (major)), 138.3 (PhC<sup>1</sup> (major)), 138.7 (PhC<sup>1</sup> (minor)), 153.2 (NCO<sup>t</sup>Bu (major)), 153.9 (NCO<sup>t</sup>Bu (minor)), 167.2 (COOEt (major)), 167.6 (COOEt (minor)), 169.7 (CONHBn (major)), 170.0 (CONHBn (minor)), 206.4 (COCH<sub>2</sub>CH<sub>2</sub> (minor)), 207.3 (COCH<sub>2</sub>CH<sub>2</sub> (major)); **<sup>19</sup>F NMR** (471 MHz, CDCl<sub>3</sub>)  $\delta_{\text{F}}$ : -66.02 (0.75F, d, *J* 10.4, CF<sub>3</sub> (minor)), -65.80 (2.25F, d, *J* 10.5, CF<sub>3</sub> (major)); **HRMS** (ESI<sup>+</sup>) C<sub>23</sub>H<sub>30</sub>F<sub>3</sub>N<sub>2</sub>O<sub>6</sub> [M+H]<sup>+</sup> found 487.2047, requires 487.2056 (-0.70 ppm).





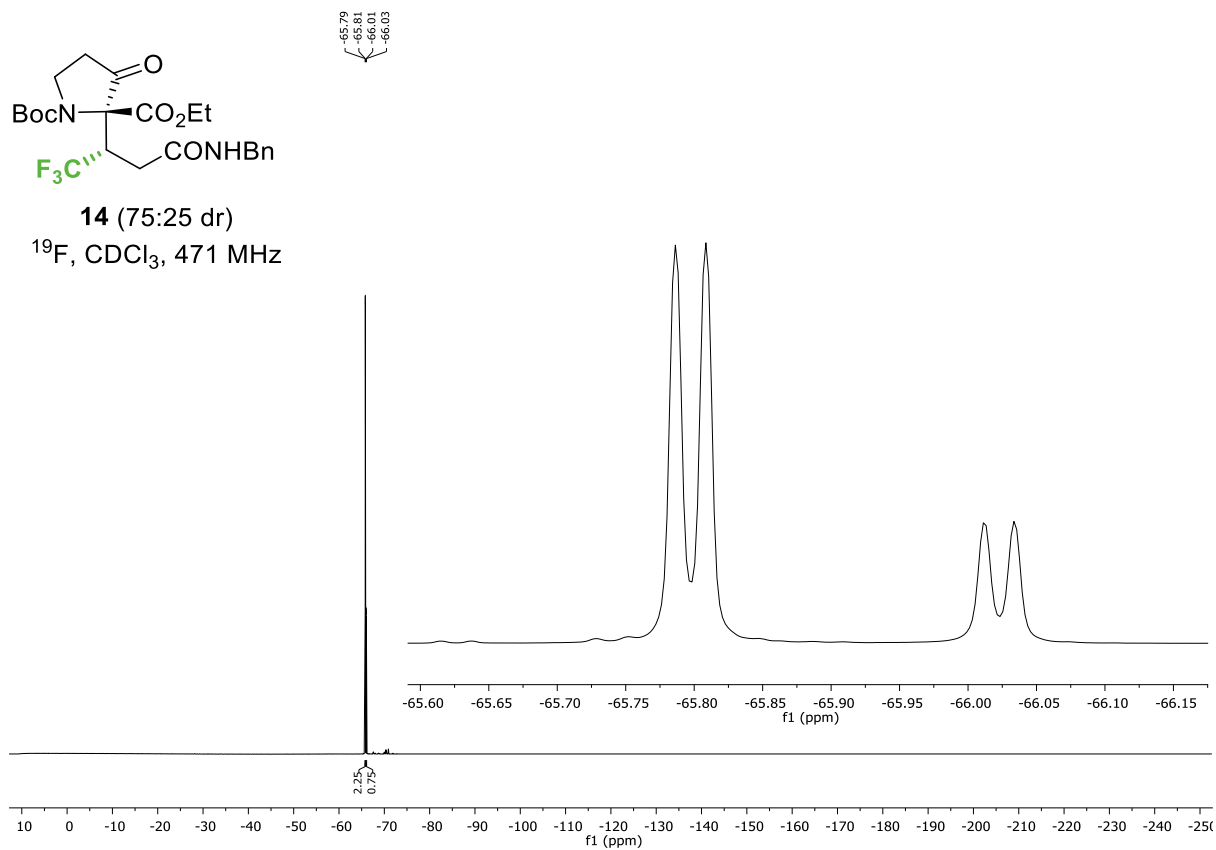

**HPLC Data for 14:** Chiralpak AS-H (98:2 hexane:*i*PrOH, flow rate 1.00 mL·min<sup>-1</sup>, 211 nm, 30 °C)  $t_R$  (2*S*,2'*R*)-**14**: 36.7 min,  $t_R$  (2*R*,2'*S*)-**14**: 42.8 min, <1:99 er;  $t_R$  *rel*-(2*S*,2'*S*)-**14**: 62.3 min,  $t_R$  *rel*-(2*R*,2'*R*)-**14**: 86.3 min, 41:59 er.

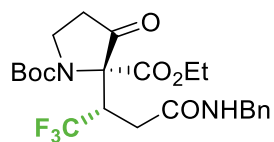

(2*R*,2'*S*)-**14**

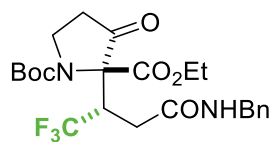

*rel*-(2*S*,2'*S*)-**14**

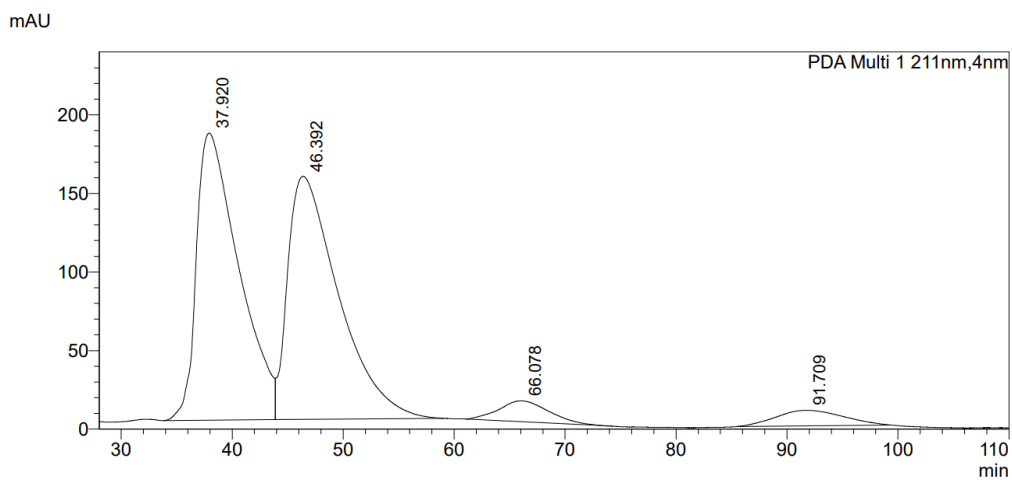

<Peak Table>

PDA Ch1 211nm

| Peak# | Ret. Time | Area%   |
|-------|-----------|---------|
| 1     | 37.920    | 45.640  |
| 2     | 46.392    | 46.532  |
| 3     | 66.078    | 3.926   |
| 4     | 91.709    | 3.903   |
| Total |           | 100.000 |

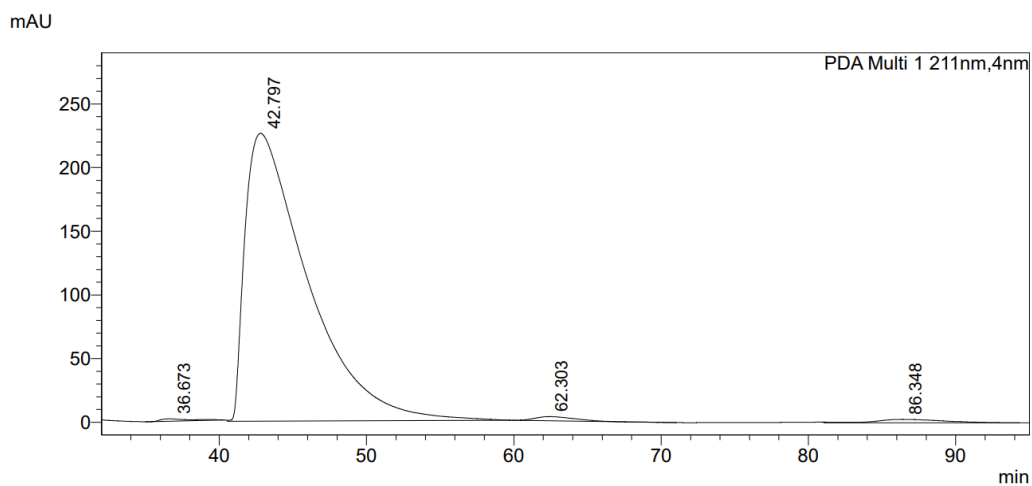

<Peak Table>

PDA Ch1 211nm

| Peak# | Ret. Time | Area%   |
|-------|-----------|---------|
| 1     | 36.673    | 0.375   |
| 2     | 42.797    | 97.514  |
| 3     | 62.303    | 0.872   |
| 4     | 86.348    | 1.239   |
| Total |           | 100.000 |

(+)-1-(*tert*-Butyl) 3-ethyl (*R*)-3-((*S*)-4'-(benzylamino)-1',1',1'-trifluoro-4'-oxobutan-2'-yl)-4-oxopyrrolidine-1,3-dicarboxylate (*3R,2'S*)-15

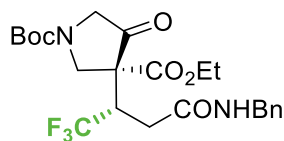

(*3R,2'S*)-15

The title compound was prepared according to **General Procedure 2**. A mixture of (*E*)-4-nitrophenyl (*E*)-4,4,4-trifluorobut-2-enoate **8** (80 mg, 0.3 mmol), (*2S,3R*)-HyperBTM **1** (4.6 mg, 15  $\mu$ mol) and 1-(*tert*-butyl) 3-ethyl 4-oxopyrrolidine-1,3-dicarboxylate (77 mg, 0.3 mmol) in DMA (1.2 mL) was stirred for 16 h at room temperature. Benzylamine (32  $\mu$ L, 0.3 mmol) was added and the reaction was permitted to stir for 1 h. The solution was diluted with Et<sub>2</sub>O, washed sequentially with saturated aqueous Na<sub>2</sub>CO<sub>3</sub> ( $\times$ 3) and brine, dried over MgSO<sub>4</sub> and filtered. The solvent was removed under reduced pressure and the residue was purified by column chromatography (1:3 EtOAc:Hexane) to give a mixture of diastereomers (78.9 mg, 54%, 83:17 d.r.) as a colourless oil.

*Data for 15*:  $[\alpha]_D^{20}$  +2.00 (*c* 0.65 in CHCl<sub>3</sub>); **IR**  $\nu_{\max}$  (film) / cm<sup>-1</sup> 3319, 2980, 2367, 1775, 1734, 1701, 1657, 1406, 1217, 1121, 1015, 885, 768; **<sup>1</sup>H NMR** (500 MHz, CDCl<sub>3</sub>, analysed as mixture of diastereomers and rotamers, 63:20:17 major (rot) : major (rot) : minor)  $\delta_{\text{H}}$ : 1.23<sub>7</sub> (1.89H, t, *J* 7.1, OCH<sub>2</sub>CH<sub>3</sub>), 1.24<sub>3</sub> (0.51H t, *J* 7.1 Hz, OCH<sub>2</sub>CH<sub>3</sub>), 1.25 (0.60H, t, *J* 7.0 Hz, OCH<sub>2</sub>CH<sub>3</sub>), 1.47 (9H, s, C(CH<sub>3</sub>)<sub>3</sub>), 2.28 (0.17H, dd, *J* 15.7, 3.4, CHCH<sub>A</sub>H<sub>B</sub>CONH), 2.49-2.67 (0.37H, m, CHCH<sub>A</sub>H<sub>B</sub>CONH), 2.54 (0.63H, dd, *J* 16.5, 6.4, CHCH<sub>A</sub>H<sub>B</sub>CONH), 2.73-2.90 (0.83H, m, CHCH<sub>A</sub>H<sub>B</sub>CONH), 3.64 (0.17H, d, *J* 12.1, CCH<sub>A</sub>H<sub>B</sub>NBoc), 3.68-4.08 (4.49H, m, CCH<sub>2</sub>NBoc, COCH<sub>2</sub>NBoc, CHCH<sub>2</sub>CONH (major)), 4.07-4.26 (1.11H, m, OCH<sub>2</sub>CH<sub>3</sub>, CHCH<sub>2</sub>CONH), 4.17 (1.26H, q, *J* 7.1, OCH<sub>2</sub>CH<sub>3</sub>), 4.38-4.54 (2.17H, m, NHCH<sub>2</sub>Ph, CCH<sub>A</sub>H<sub>B</sub>NBoc), 5.99-6.14 (1H, m, NH), 7.23-7.29 (3H, m, PhC<sup>2,4,6</sup>H), 2.29-2.35 (2H, m, PhC<sup>3,5</sup>H); **<sup>13</sup>C{<sup>1</sup>H} NMR** (126 MHz, CDCl<sub>3</sub>)  $\delta_{\text{C}}$ : 13.9 (OCH<sub>2</sub>CH<sub>3</sub> (major)), 14.2 (OCH<sub>2</sub>CH<sub>3</sub> (minor)), 28.4 (C(CH<sub>3</sub>)<sub>3</sub> (major and minor)), 32.2 (CHCH<sub>2</sub>CONH (minor)), 32.5 (CHCH<sub>2</sub>CONH (major)), 41.8 (q, *J* 26.0, CHCH<sub>2</sub>CONH (minor)), 42.7 (q, *J* 26.8, CHCH<sub>2</sub>CONH (major)), 44.0 (NHCH<sub>2</sub>Ph (major)), 48.8 and 48.3 (rotameric CCH<sub>2</sub>NBoc (minor)), 49.3 and 50.0 (rotameric CCH<sub>2</sub>NBoc (major), NHCH<sub>2</sub>Bn (minor)), 51.8 and 52.4 (rotameric, COCH<sub>2</sub>NBoc (major)), 60.2 and 60.7 (rotameric, CCH<sub>2</sub>CH<sub>2</sub> (major)), 60.5 (CCH<sub>2</sub>CH<sub>2</sub> (minor)), 63.2 (OCH<sub>2</sub>CH<sub>3</sub> (major)), 63.4 (OCH<sub>2</sub>CH<sub>3</sub> (minor)), 80.9 (COC(CH<sub>3</sub>)<sub>3</sub> (minor)), 81.1 (COC(CH<sub>3</sub>)<sub>3</sub> (major)), 126.5 (q, *J* 281.8, CF<sub>3</sub>, major), 127.7<sub>1</sub> (PhC<sup>4</sup>H (major)), 127.7<sub>4</sub> (PhC<sup>4</sup>H (minor)), 127.9<sub>1</sub> (PhC<sup>2,6</sup>H (major)), 127.9<sub>3</sub> (PhC<sup>2,6</sup>H), 128.8 (PhC<sup>3,5</sup>H (major and minor)), 137.8 (PhC<sup>1</sup> (minor)), 137.9 (PhC<sup>1</sup> (major)), 154.0 (NCOC(CH<sub>3</sub>)<sub>3</sub> (major)), 154.1 (NCOC(CH<sub>3</sub>)<sub>3</sub> (minor)), 166.6 (COOEt (major and minor)), 168.4 (CONHBn (minor)), 168.7 (CONHBn (major)), 203.4 and 203.9 (rotameric, COCH<sub>2</sub>NBoc (major)), 203.6 (COCH<sub>2</sub>NBoc (minor)) - CF<sub>3</sub> quartet not resolved for minor diastereomer; **<sup>19</sup>F NMR** (471 MHz, CDCl<sub>3</sub>)  $\delta_{\text{F}}$ : -65.97 (0.51F, dd,

$J$  127.0, 9.7,  $CF_3$  (minor)),  $-64.25$  (2.49F, dd,  $J$  134.3, 9.6,  $CF_3$  (major)). HRMS (ESI<sup>+</sup>)  $C_{23}H_{29}F_3N_2O_6Na$   $[M+Na]^+$  found 509.1870, requires 509.1874 (+0.80 ppm).

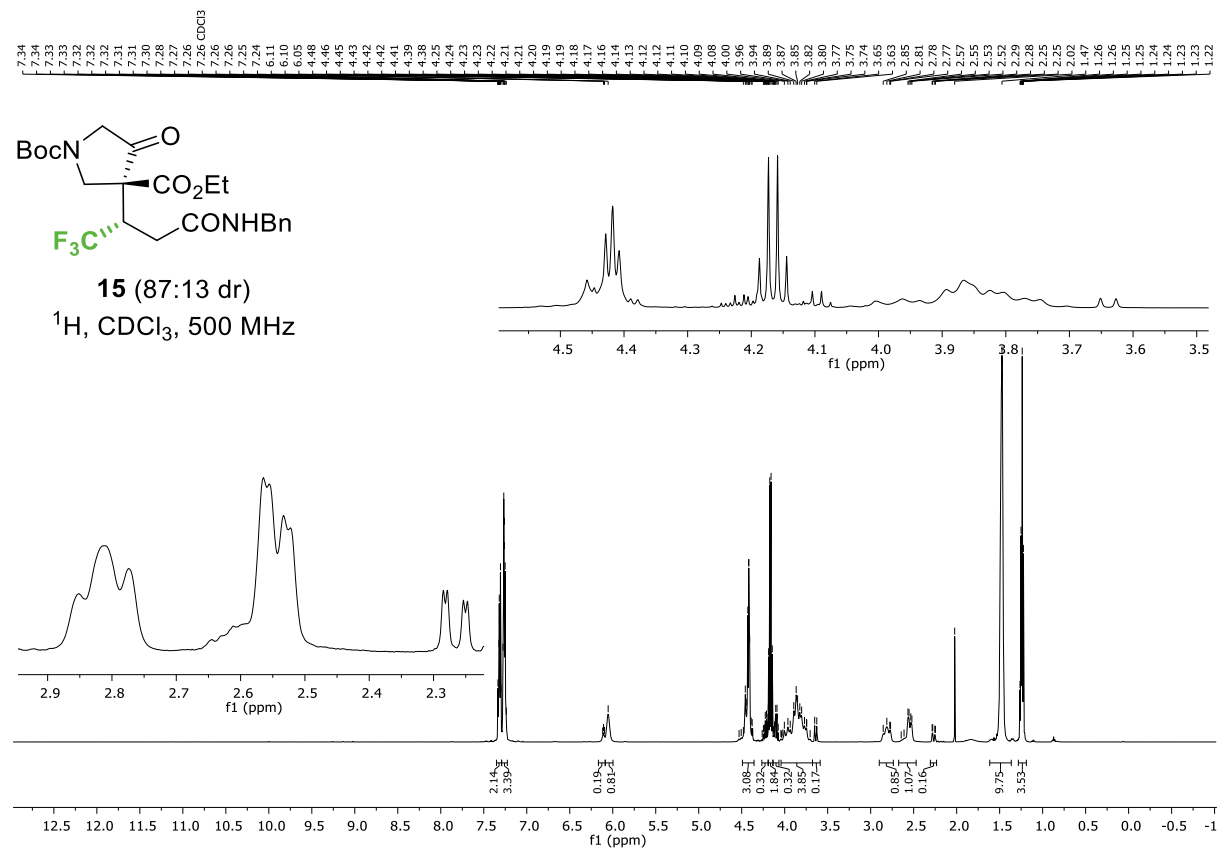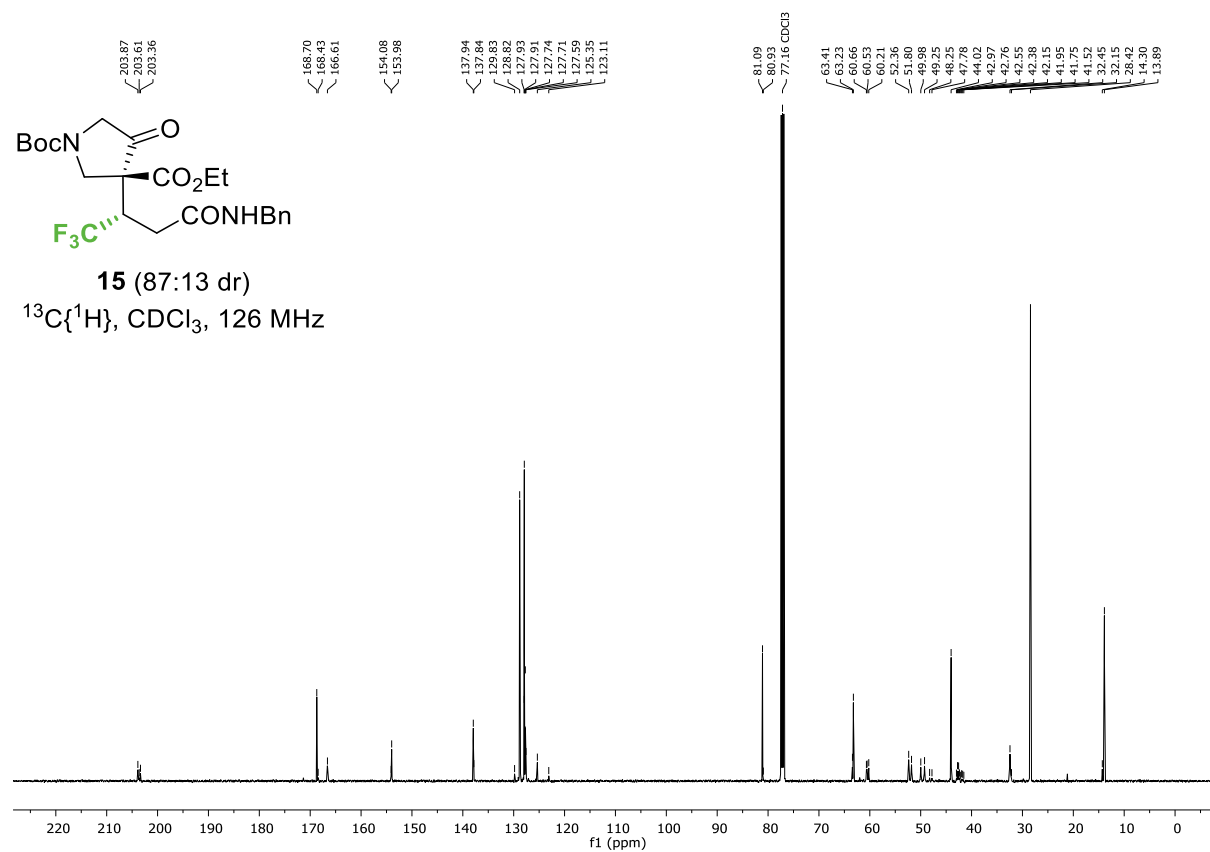

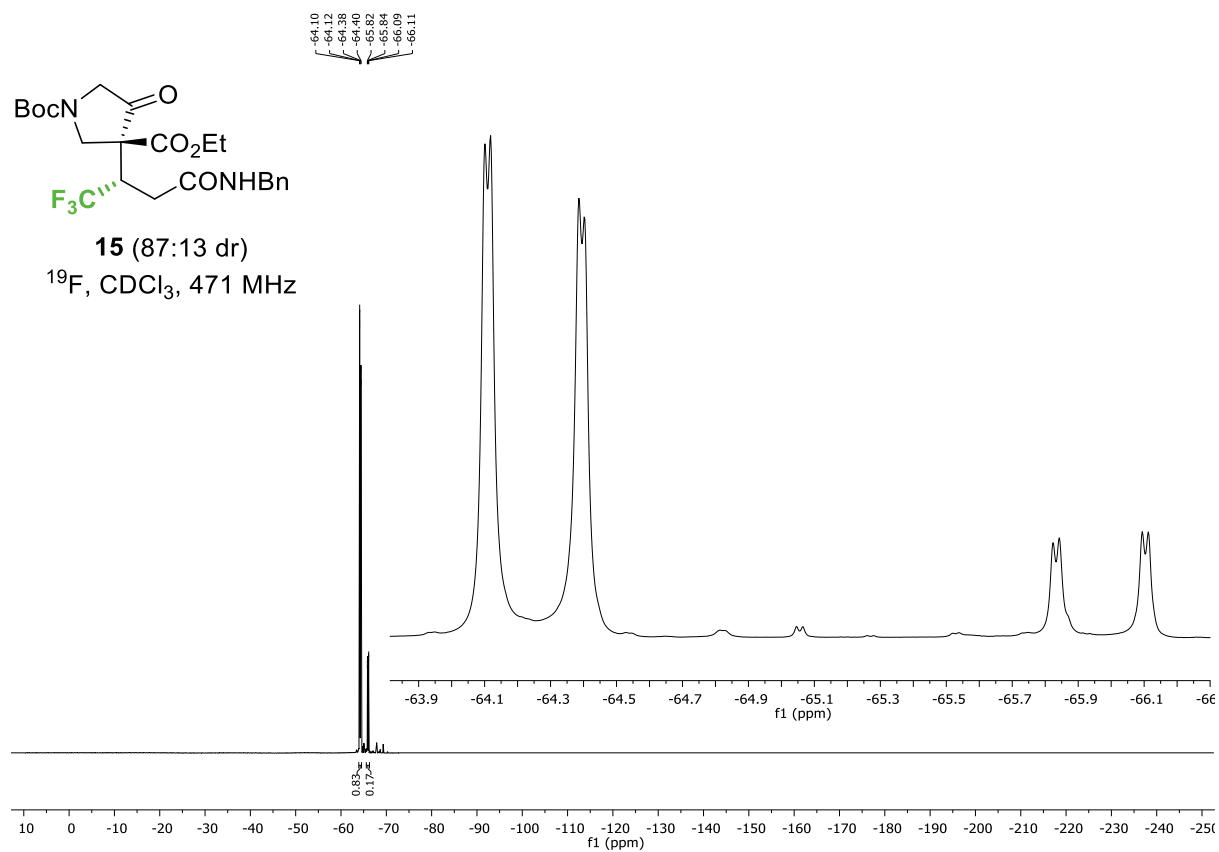

**HPLC Data for 15:** Chiralpak AS-H (98:2 hexane:*i*PrOH, flow rate 1.00 mL·min<sup>-1</sup>, 211 nm, 30 °C)  $t_R$  (3*R*,2'*S*)-**15**: 23.4 min,  $t_R$  (3*S*,2'*R*)-**15**: 39.0 min, 87:13 er;  $t_R$  *rel*-(3*R*,2'*R*)-**15**: 51.1 min,  $t_R$  *rel*-(3*S*,2'*S*)-**15**: 62.4 min, 3:97 er.

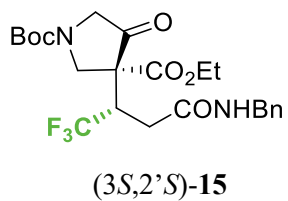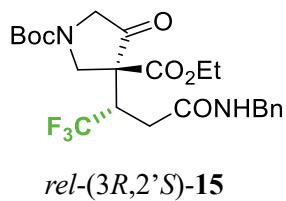

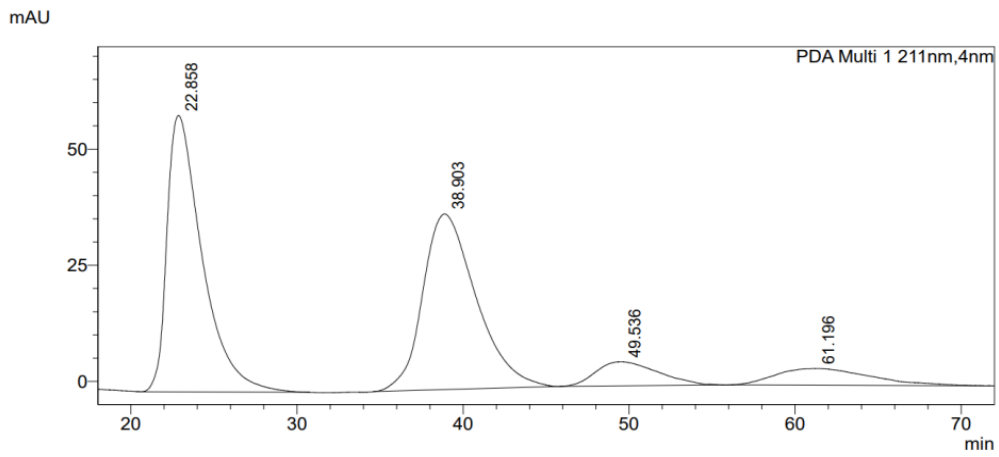

**<Peak Table>**

PDA Ch1 211nm

| Peak# | Ret. Time | Area%   |
|-------|-----------|---------|
| 1     | 22.858    | 43.852  |
| 2     | 38.903    | 42.242  |
| 3     | 49.536    | 6.741   |
| 4     | 61.196    | 7.166   |
| Total |           | 100.000 |

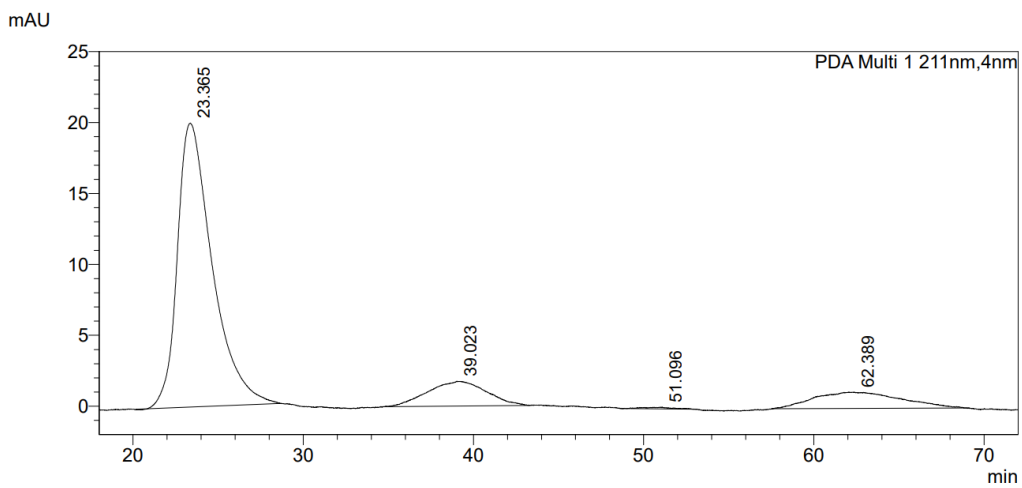

**<Peak Table>**

PDA Ch1 211nm

| Peak# | Ret. Time | Area%   |
|-------|-----------|---------|
| 1     | 23.365    | 77.163  |
| 2     | 39.023    | 11.269  |
| 3     | 51.096    | 0.333   |
| 4     | 62.389    | 11.235  |
| Total |           | 100.000 |

(+)-Ethyl (S)-2-((S)-4'-(benzylamino)-1',1',1'-trifluoro-4'-oxobutan-2'-yl)-1-oxo-2,3-dihydro-1H-indene-2-carboxylate (2S,2'S)-16

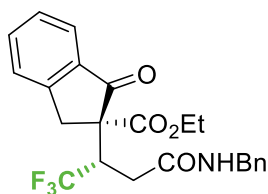

(2S,2'S)-16

The title compound was prepared according to **General Procedure 2**. A mixture of 4-nitrophenyl (*E*)-4,4,4-trifluorobut-2-enoate **8** (261 mg, 1.0 mmol), (2*S*,3*R*)-HyperBTM **1** (15.4 mg, 50  $\mu$ mol) and methyl 1-oxo-2,3-dihydro-1*H*-indene-2-carboxylate **S4** (204 mg, 1.0 mmol) in DMA (4.0 mL) was stirred for 16 h at room temperature. Benzylamine (110  $\mu$ L, 1.0 mmol) was added and the reaction was permitted to stir for 1 h. The solution was diluted with Et<sub>2</sub>O, washed sequentially with saturated aqueous Na<sub>2</sub>CO<sub>3</sub> ( $\times$ 3) and brine, dried over MgSO<sub>4</sub> and filtered. The solvent was removed under reduced pressure and the residue was purified by column chromatography (1:3 EtOAc:Hexane) to give the title compound in two fractions (major diastereomer: 220.8 mg, 51% as a colourless oil, and minor diastereomer: 93.4 mg, 22% as a colourless oil); combined (314.2 mg, 73%, 72:28 d.r.).

*Data for major diastereoisomer (2S,2'S)-16*:  $[\alpha]_D^{20}$  +0.65 (*c* 1.00 in CHCl<sub>3</sub>); **IR**  $\nu_{\max}$  (film) 3304, 2984, 1740, 1717, 1651, 1545, 1275, 1111, 1043, 962, 860; **<sup>1</sup>H NMR** (500 MHz, CDCl<sub>3</sub>)  $\delta_H$ : 1.17 (3H, t, *J* 7.1, OCH<sub>2</sub>CH<sub>3</sub>), 2.66 (1H, dd, *J* 15.7, 7.8, CHCH<sub>A</sub>H<sub>B</sub>CONH), 2.74 (1H, dd, *J* 15.7, 3.6, CHCH<sub>A</sub>H<sub>B</sub>CONH), 3.32 (1H, d, *J* 17.6, CCH<sub>A</sub>H<sub>B</sub>Ar), 3.83 (1H, d, *J* 17.6, CCH<sub>A</sub>H<sub>B</sub>Ar), 4.06 (1H, qdd, *J* 9.1, 7.7, 3.6, CHCH<sub>2</sub>CONH), 4.13 (2H, q, *J* 7.1, OCH<sub>2</sub>CH<sub>3</sub>), 4.42 (1H, dd, *J* 14.7, 5.7), 4.46 (2H, dd, *J* 14.7, 5.7, NHCH<sub>2</sub>Ph), 6.30 (1H, app t, *J* 5.8, NH), 7.23-7.30 (3H, m, PhC<sup>2,4,6</sup>H), 7.30-7.35 (2H, m, PhC<sup>3,5</sup>H), 7.39 (1H, app td, *J* 7.5, 0.9 ArC<sup>5</sup>H), 7.48 (1H, app dt, *J* 7.7, 1.0, PhC<sup>4</sup>H), 7.63 (1H, app td, *J* 7.5, 1.3, ArC<sup>5</sup>H), 7.75 (1H, app dt, *J* 7.7, 1.0, ArC<sup>7</sup>H); **<sup>13</sup>C{<sup>1</sup>H} NMR** (126 MHz, CDCl<sub>3</sub>)  $\delta_C$ : 13.9 (OCH<sub>2</sub>CH<sub>3</sub>), 33.7 (CHCH<sub>2</sub>CONH), 34.2 (CCH<sub>2</sub>Ar), 44.0 (NHCH<sub>2</sub>Ph), 44.1 (q, *J* 26.0, CHCH<sub>2</sub>CONH), 61.4 (CCOOEt), 62.8 (OCH<sub>2</sub>CH<sub>3</sub>), 125.2 (ArC<sup>7</sup>H), 126.4 (ArC<sup>4</sup>H), 126.8 (q, *J* 280.9, CF<sub>3</sub>), 127.6 (PhC<sup>4</sup>H), 127.9 (PhC<sup>2,6</sup>H), 128.1 (ArC<sup>6</sup>H), 128.8 (PhC<sup>3,5</sup>H), 134.3 (ArC<sup>7a</sup>), 135.8 (ArC<sup>5</sup>H), 138.0 (PhC<sup>1</sup>), 152.7 (ArC<sup>3a</sup>), 168.9 (COOEt), 169.1 (CONHBn), 198.6 (ArC<sup>7a</sup>CO); **<sup>19</sup>F{<sup>1</sup>H} NMR** (471 MHz, CDCl<sub>3</sub>)  $\delta_F$ : -64.11 (CF<sub>3</sub>). **HRMS** (ESI<sup>+</sup>) C<sub>23</sub>H<sub>23</sub>F<sub>3</sub>O<sub>4</sub>N [M+H]<sup>+</sup> found 434.1568, requires 434.1574 (-1.3 ppm).

*Data for minor diastereoisomer rel-(2R,2'S)-16*:  $[\alpha]_D^{20}$  -0.108 (*c* 0.5 in CHCl<sub>3</sub>); **IR**  $\nu_{\max}$  (film) 3285, 3092, 1717, 1651, 1558, 1456, 1373, 1119, 964, 858; **<sup>1</sup>H NMR** (500 MHz, CDCl<sub>3</sub>)  $\delta_H$ : 1.24 (3H, t, *J* 7.1, OCH<sub>2</sub>CH<sub>3</sub>), 2.06 (1H, dd, *J* 15.5, 2.9, CHCH<sub>A</sub>H<sub>B</sub>CONH), 2.37 (1H, dd, *J* 15.5, 8.8, CHCH<sub>A</sub>H<sub>B</sub>CONH), 3.15 (1H, d, *J* 17.4, CCH<sub>A</sub>H<sub>B</sub>Ar), 3.93 (1H, d, *J* 17.4, CCH<sub>A</sub>H<sub>B</sub>Ar), 4.13 (1H, dq, *J* 10.8, 7.1, OCH<sub>A</sub>H<sub>B</sub>CH<sub>3</sub>), 4.20 (1H, dq, *J* 10.8, 7.1, OCH<sub>A</sub>H<sub>B</sub>CH<sub>3</sub>), 4.36 (1H, app pd, *J* 8.9, 2.9,



CHCH<sub>2</sub>CONH), 4.40 (1H, dd, *J* 14.6, 5.7, NHCH<sub>A</sub>H<sub>B</sub>Ph), 4.44 (1H, dd, *J* 14.6, 5.7, NHCH<sub>A</sub>H<sub>B</sub>Ph), 5.94 (1H, app t, *J* 5.7, NH), 7.23-7.28 (3H, m, PhC<sup>2,4,6</sup>H), 7.29-7.34 (2H, m, PhC<sup>2,6</sup>H), 7.39 (1H, app td, *J* 7.5, 1.0, ArC<sup>6</sup>H), 7.53 (1H, app dt, *J* 7.8, 0.9, ArC<sup>4</sup>H), 7.65 (1H, app td, *J* 7.5, 1.2, ArC<sup>5</sup>H), 7.73 (1H, app dt, *J* 7.7, 1.0, ArC<sup>7</sup>H); <sup>13</sup>C{<sup>1</sup>H} NMR (126 MHz, CDCl<sub>3</sub>) δ<sub>C</sub>: 13.9 (OCH<sub>2</sub>CH<sub>3</sub>), 32.6 (CCH<sub>2</sub>Ar), 33.0 (CHCH<sub>2</sub>CONH), 43.5 (q, *J* 26.4, CHCH<sub>2</sub>CONH), 44.0 (NHCH<sub>2</sub>Ph), 62.7 (CCOOEt), 63.0 (OCH<sub>2</sub>CH<sub>3</sub>), 125.2 (ArC<sup>7</sup>H), 126.6 (ArC<sup>4</sup>H), 127.3 (q, *J* 281.7, CF<sub>3</sub>), 127.7 (PhC<sup>4</sup>H), 128.0 (PhC<sup>2,6</sup>H), 128.2 (ArC<sup>6</sup>H), 128.8 (PhC<sup>3,5</sup>H), 134.1 (ArC<sup>7a</sup>), 136.3 (ArC<sup>5</sup>H), 138.0 (PhC<sup>1</sup>), 153.9 (ArC<sup>3a</sup>), 167.7 (COOEt), 168.4 (CONHBn), 199.0 (ArC<sup>7a</sup>CO); <sup>19</sup>F{<sup>1</sup>H} NMR (471 MHz, CDCl<sub>3</sub>) δ<sub>F</sub>: -65.80 (CF<sub>3</sub>); HRMS (ESI<sup>+</sup>) C<sub>23</sub>H<sub>23</sub>F<sub>3</sub>O<sub>4</sub>N [M+H]<sup>+</sup> found 434.1568, requires 434.1574 (-1.3 ppm).

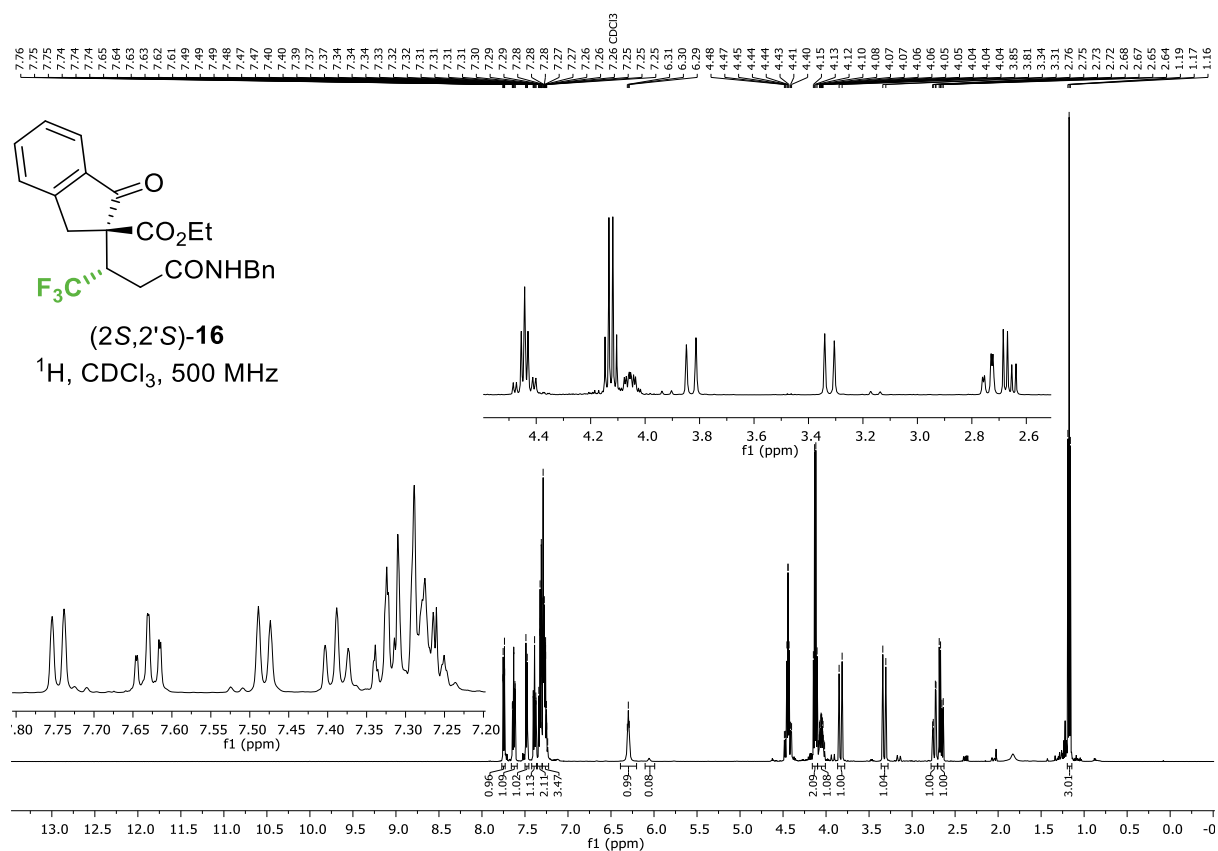

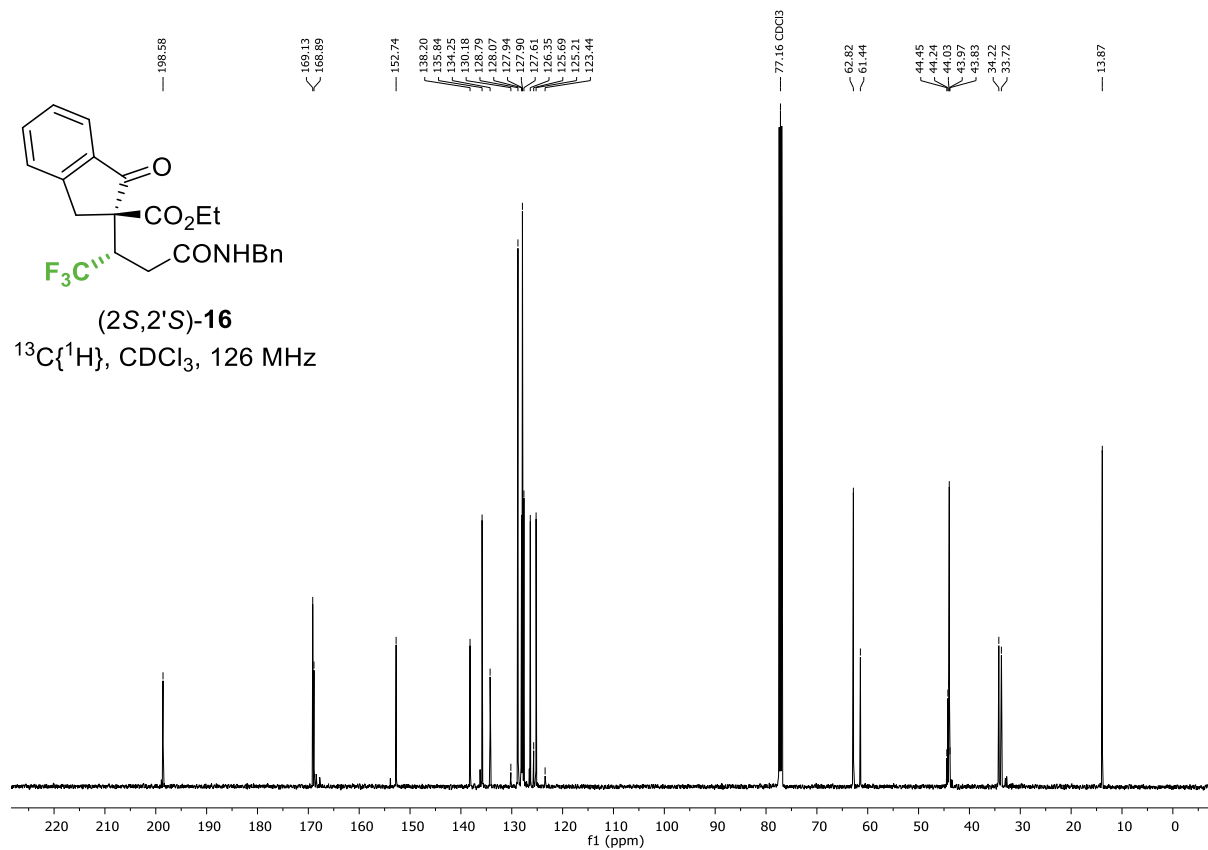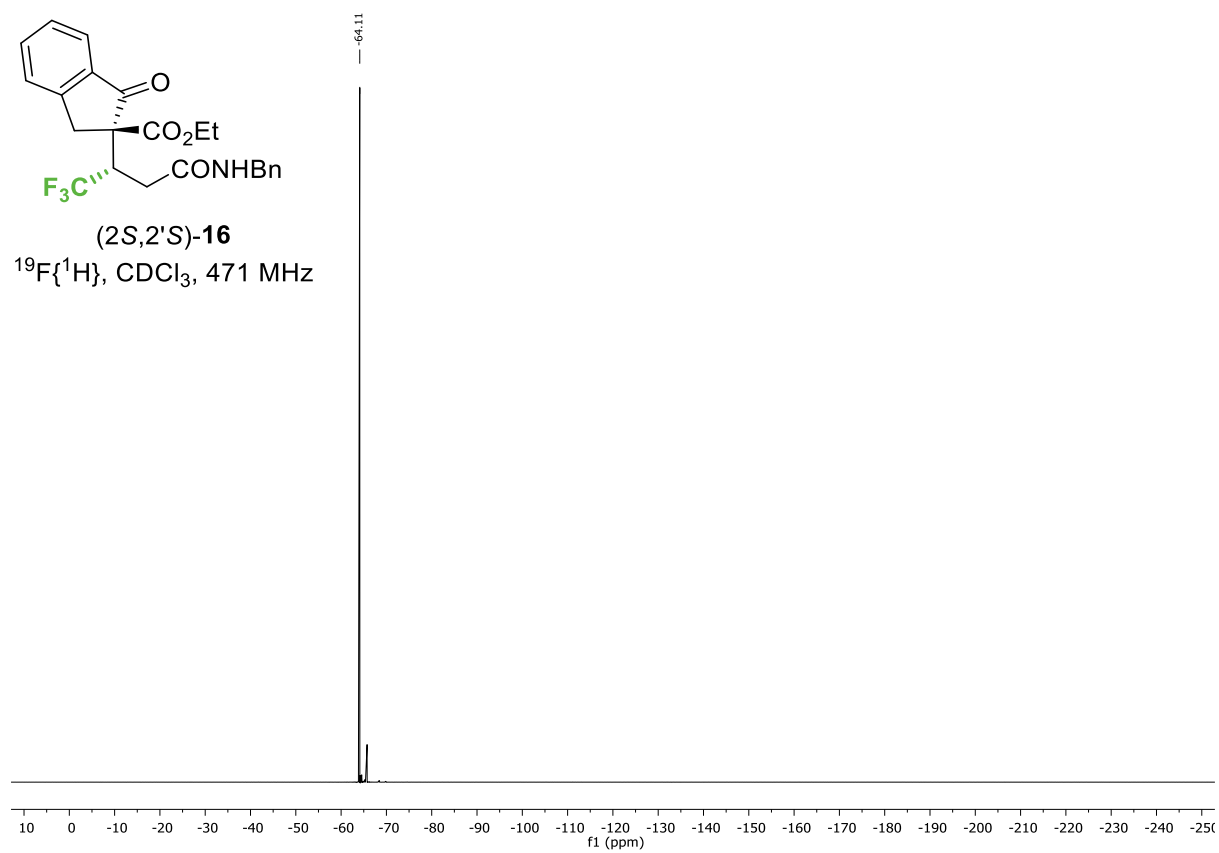

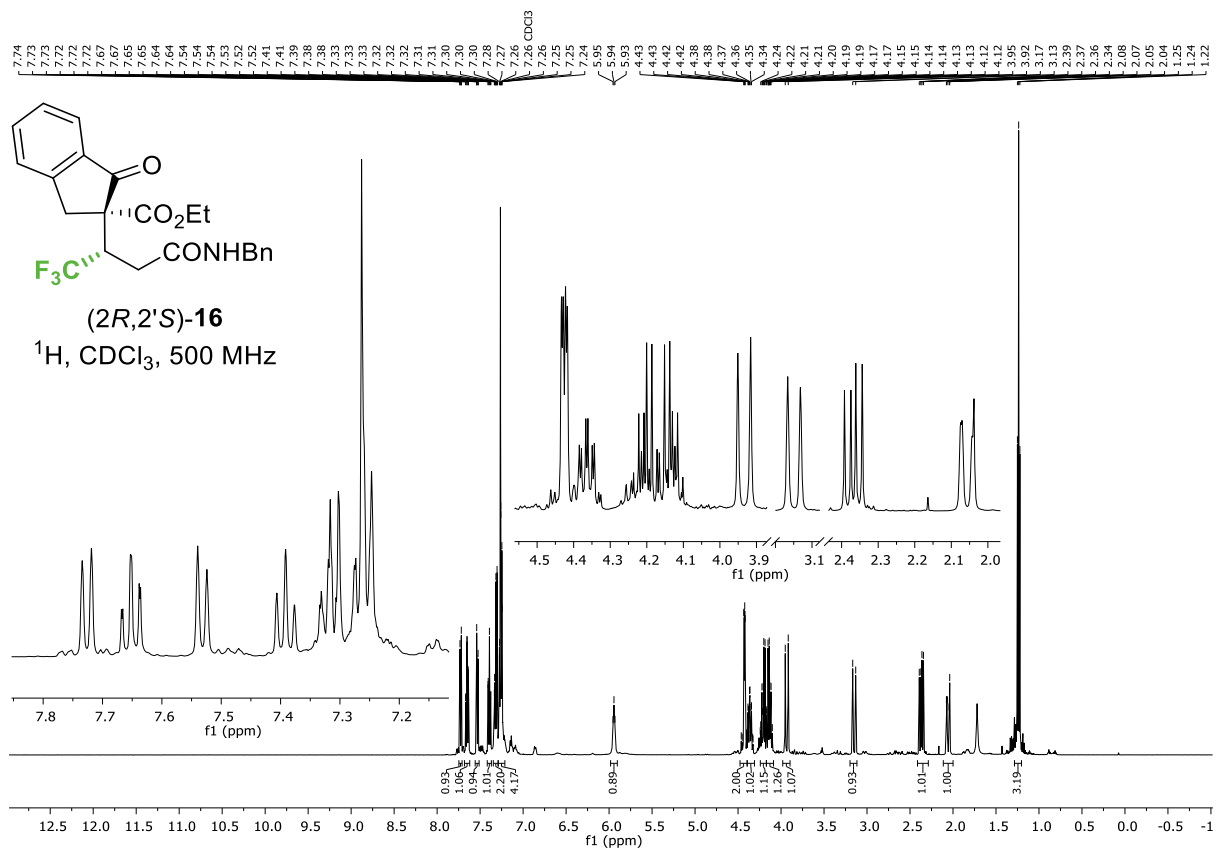

V

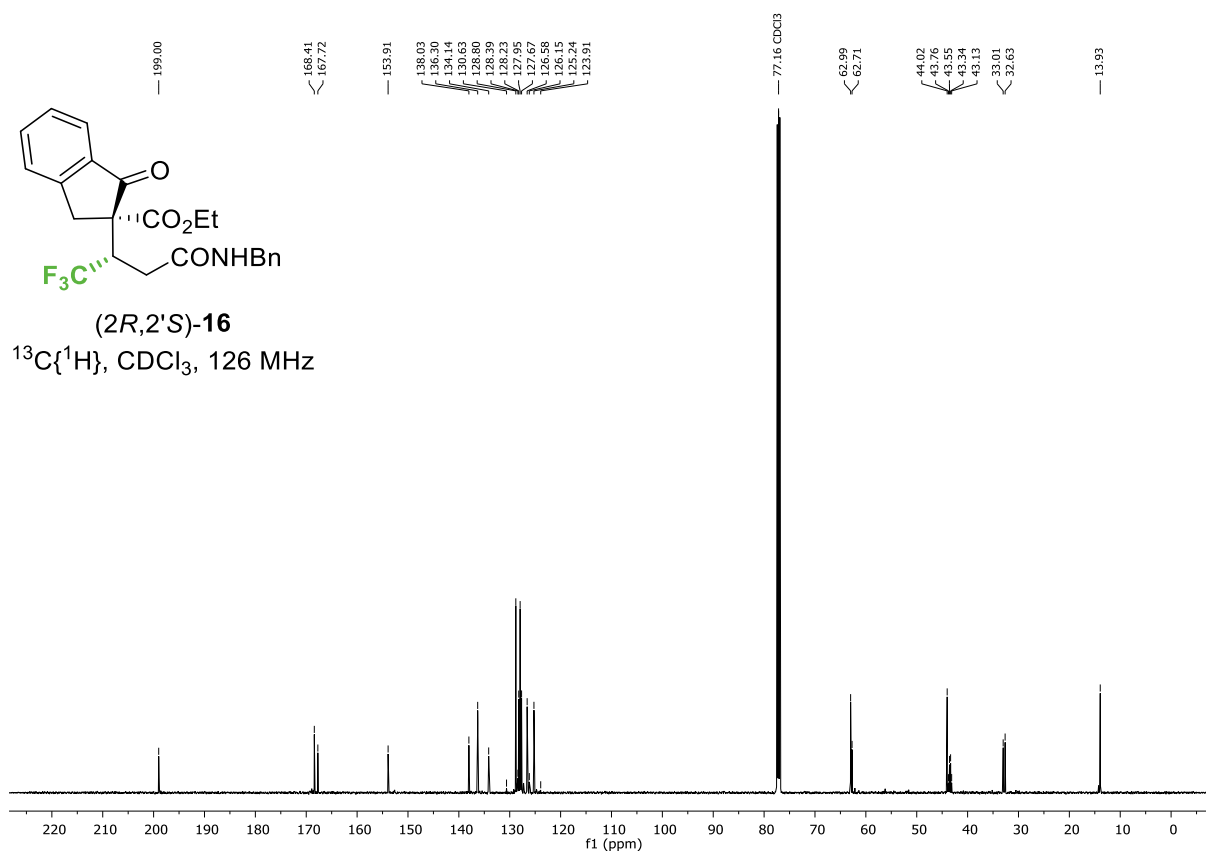

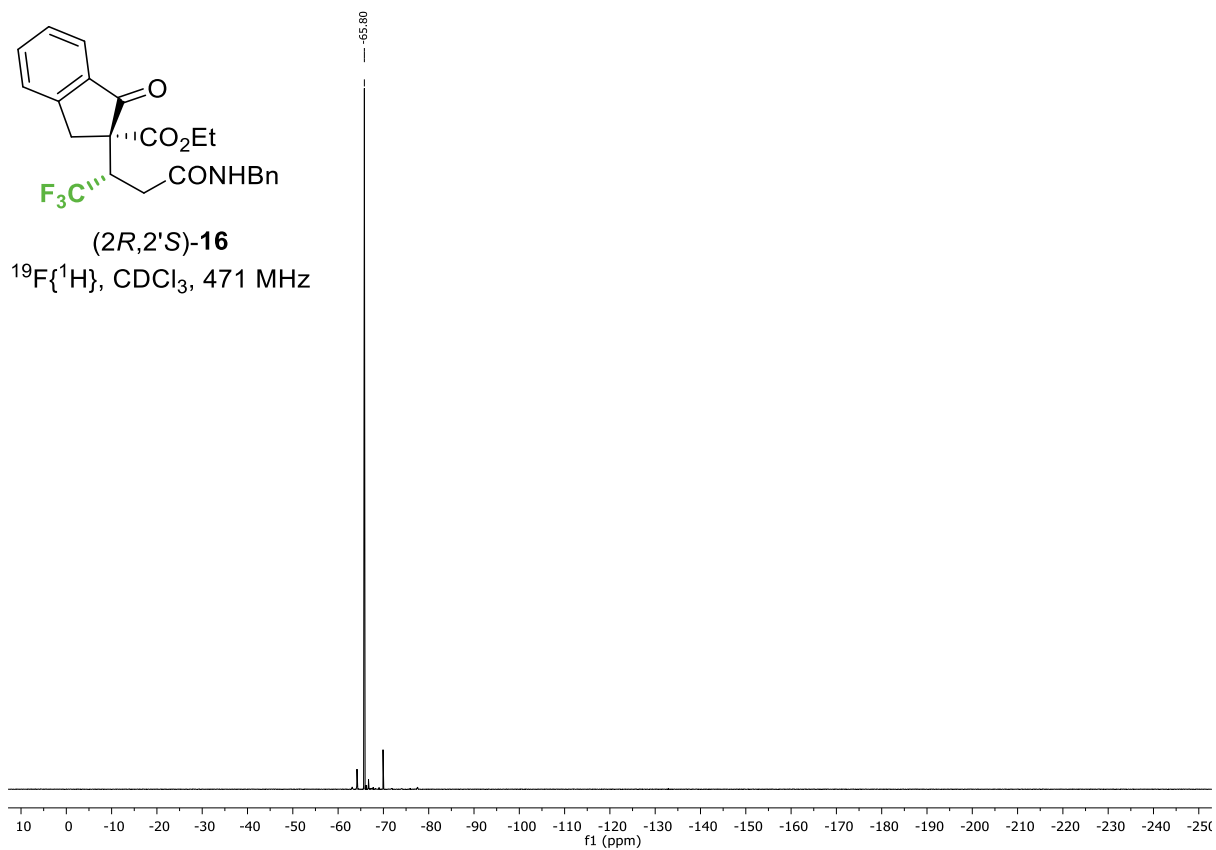

**HPLC Data for (2*S*,2'*S*)-16:** Chiralpak AD-H (95:5 hexane:*i*PrOH, flow rate 1.00 mL·min<sup>-1</sup>, 211 nm, 30 °C) *t*<sub>R</sub> (2*S*,2'*S*)-**16**: 42.1 min, *t*<sub>R</sub> (2*R*,2'*R*)-**16**: 53.1 min, 94:6 er.

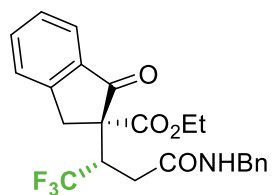

**(2*S*,2'*S*)-16**

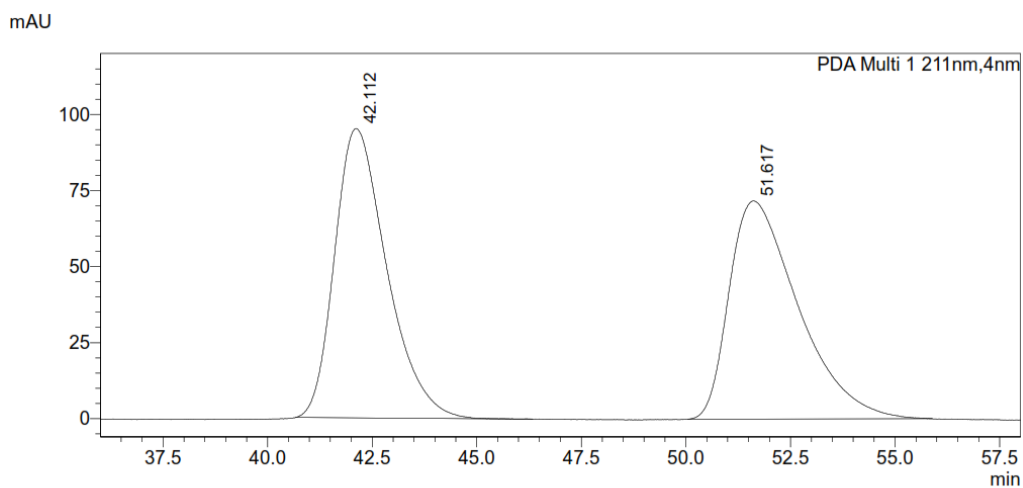

<Peak Table>

PDA Ch1 211nm

| Peak# | Ret. Time | Area%   |
|-------|-----------|---------|
| 1     | 42.112    | 50.118  |
| 2     | 51.617    | 49.882  |
| Total |           | 100.000 |

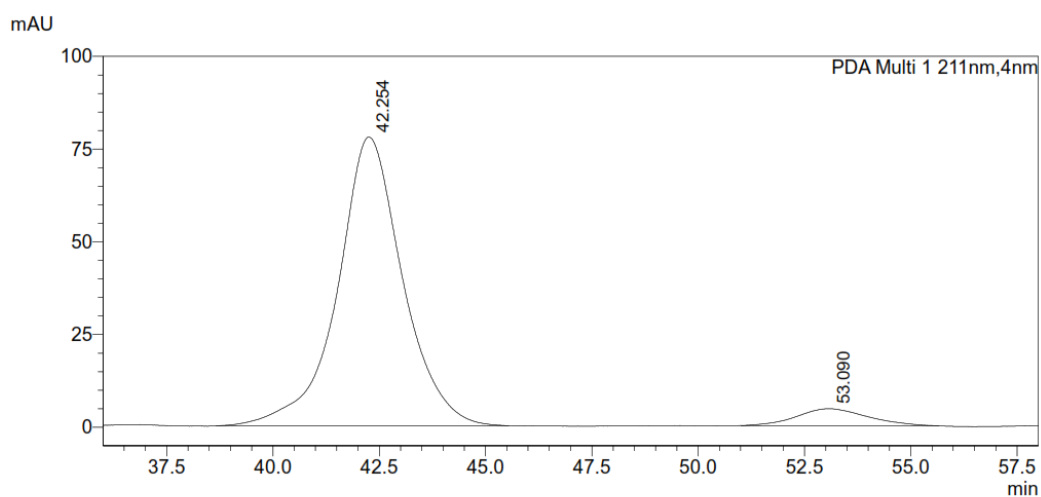

<Peak Table>

PDA Ch1 211nm

| Peak# | Ret. Time | Area%   |
|-------|-----------|---------|
| 1     | 42.254    | 93.933  |
| 2     | 53.090    | 6.067   |
| Total |           | 100.000 |

**HPLC Data for *rel*-(2*R*,2'*R*)-16:** Chiralpak AD-H (90:5 hexane:*i*PrOH, flow rate 1.00 mL·min<sup>-1</sup>, 211 nm, 30 °C) *t<sub>R</sub>* *rel*-(2*R*,2'*S*)-16: 41.1 min, *t<sub>R</sub>* *rel*-(2*S*,2'*R*)-16: 81.6 min, 96:4 er.

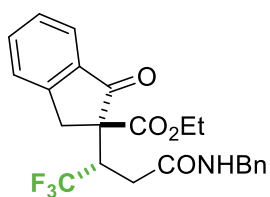

*rel*-(2*R*,2'*S*)-16

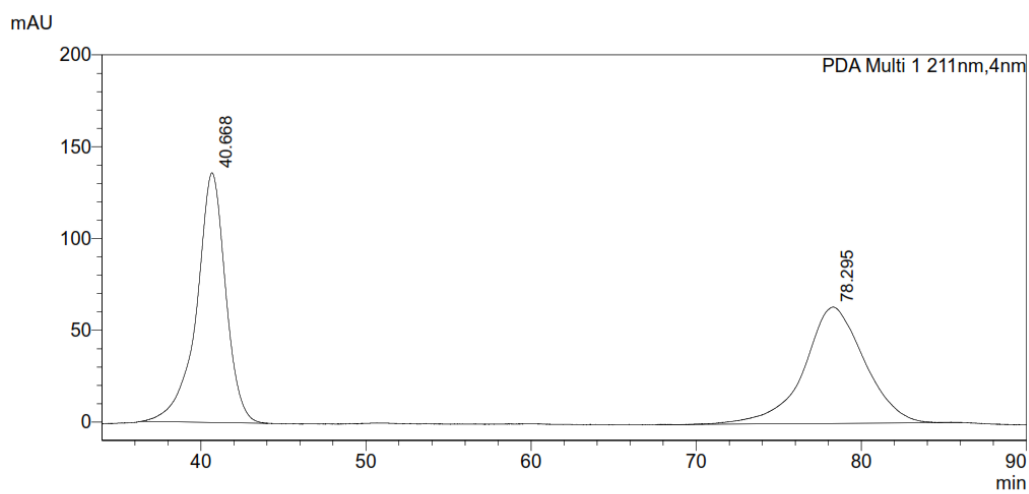

**<Peak Table>**

PDA Ch1 211nm

| Peak# | Ret. Time | Area%   |
|-------|-----------|---------|
| 1     | 40.668    | 50.842  |
| 2     | 78.295    | 49.158  |
| Total |           | 100.000 |

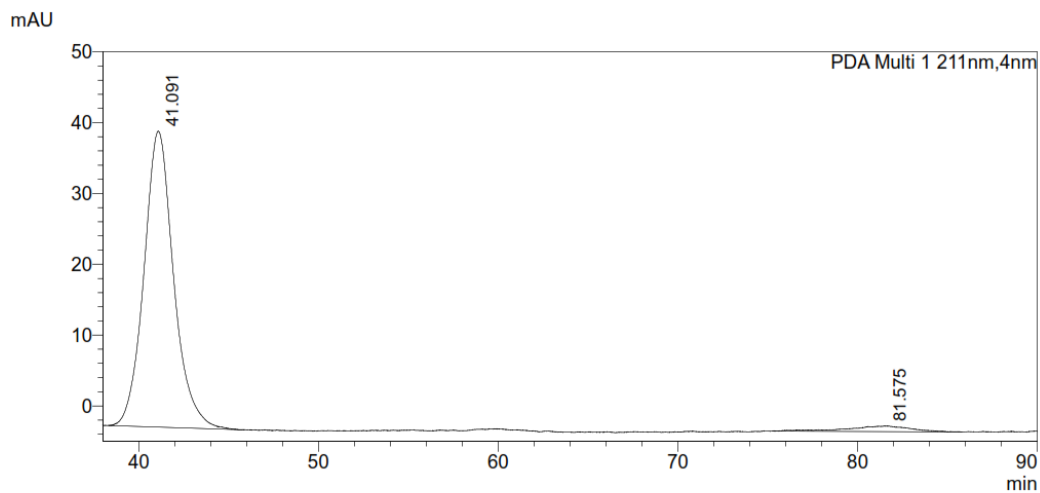

**<Peak Table>**

PDA Ch1 211nm

| Peak# | Ret. Time | Area%   |
|-------|-----------|---------|
| 1     | 41.091    | 96.014  |
| 2     | 81.575    | 3.986   |
| Total |           | 100.000 |

(+)-Ethyl (*R*)-2-((*S*)-4'-(benzylamino)-1',1',1'-trifluoro-4'-oxobutan-2'-yl)-3-oxo-2,3-dihydrobenzofuran-2-carboxylate (*2R,2'S*)-17

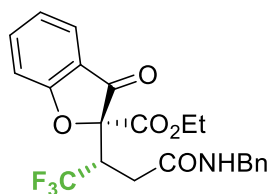

(*2R,2'S*)-17

The title compound was prepared according to **General Procedure 2**. A mixture of 4-nitrophenyl (*E*)-4,4,4-trifluorobut-2-enoate **8** (80 mg, 0.3 mmol), (*2S,3R*)-HyperBTM **1** (4.6 mg, 15  $\mu$ mol) and methyl 3-oxo-2,3-dihydrobenzofuran-2-carboxylate **S5** (63 mg, 0.3 mmol) in DMA (1.2 mL) was stirred for 16 h at room temperature. Benzylamine (32  $\mu$ L, 0.3 mmol) was added, and the reaction was permitted to stir for 1 h. The solution was diluted with Et<sub>2</sub>O, washed sequentially with saturated aqueous Na<sub>2</sub>CO<sub>3</sub> ( $\times 3$ ) and brine, dried over MgSO<sub>4</sub> and filtered. The solvent was removed under reduced pressure and the residue was purified by column chromatography (1:3 EtOAc:Hexane) to give the title compound (91.3 mg, 69%, 85:15 d.r.) as a mixture of diastereomers as a white solid.

*Data for 17* (analysed as 85:15 mixture of diastereomers): **mp** 65-70 °C;  $[\alpha]_D^{20} +42.6$  (*c* 0.5 in CHCl<sub>3</sub>); **IR**  $\nu_{\max}$  (film) 3389, 3304, 2984, 1751, 1732, 1653, 1611, 1545, 1462, 1227, 1125, 1026, 891, 856; **<sup>1</sup>H NMR** (500 MHz, CDCl<sub>3</sub>)  $\delta_H$ : 1.26 (2.55H, t, *J* 7.1, OCH<sub>2</sub>CH<sub>3</sub>), 1.28 (0.45H, t, *J* 7.1, OCH<sub>2</sub>CH<sub>3</sub>), 2.21 (0.15H, dd, *J* 15.8, 4.0, CHCH<sub>A</sub>H<sub>B</sub>CONH), 2.41 (0.15H, dd, *J* 15.8, 8.3, CHCH<sub>A</sub>H<sub>B</sub>CONH), 2.72 (0.85H, ddd, *J* 16.2, 7.7, 2.5, CHCH<sub>A</sub>H<sub>B</sub>CONH), 2.83 (0.85H, dd, *J* 16.2, 4.0, CHCH<sub>A</sub>H<sub>B</sub>CONH), 4.15-4.30 (2.85H, m, OCH<sub>2</sub>CH<sub>3</sub> (major and minor), CHCH<sub>2</sub>CONH (major)), 4.33-4.41 (0.45H, m, CHCH<sub>2</sub>CONHCH<sub>2</sub>Ph), 4.41 (0.85H, dd, *J* 14.7, 5.4, NHCH<sub>A</sub>H<sub>B</sub>Ph), 4.51 (0.85H, dd, *J* 14.7, 5.9, NHCH<sub>A</sub>H<sub>B</sub>Ph), 5.68 (0.15H, app t, *J* 5.0, NH), 5.96 (0.85H, app t, *J* 5.8, NH), 7.14 (0.15H, app td, *J* 7.4, ArC<sup>5</sup>H), 7.16 (0.85H, app t, *J* 7.4, ArC<sup>5</sup>H), 7.20-7.24 (1.00H, m, ArC<sup>7</sup>H), 7.25-7.30 (3.00H, m, PhC<sup>2,4,6</sup>H), 7.30-7.36 (2.00H, m, PhC<sup>3,5</sup>H), 7.61 (0.15H, dd, *J* 7.8, 1.4, ArC<sup>4</sup>H), 7.67 (0.85H, app ddd, *J* 7.7, 7.1, 1.5, ArC<sup>6</sup>H), 7.68<sub>2</sub> (0.85H, d, *J* 7.6, ArC<sup>4</sup>H), 7.68<sub>5</sub> (0.15H, ap td, *J* 8.3, 7.3, 1.5, ArC<sup>6</sup>H); **<sup>13</sup>C{<sup>1</sup>H} NMR** (126 MHz, CDCl<sub>3</sub>)  $\delta_C$ : 14.0 (OCH<sub>2</sub>CH<sub>3</sub> (major and minor)), 31.1 (CHCH<sub>2</sub>CONH (minor)), 32.2 (CHCH<sub>2</sub>CONH (major)), 44.0 (q, *J* 27.0, CHCH<sub>2</sub>CONH (major)), 44.1 (NHCH<sub>2</sub>Ph (major and minor)), 44.2 (q, *J* 27.0, CHCH<sub>2</sub>CONH (minor)), 63.7 (OCH<sub>2</sub>CH<sub>3</sub> (minor)), 63.8 (OCH<sub>2</sub>CH<sub>3</sub> (major)), 89.2 (CCOOEt (major and minor)), 113.7 (ArC<sup>7</sup>H (major)), 113.9 (ArC<sup>7</sup>H (minor)), 119.1 (ArC<sup>3a</sup> (major)), 119.2 (ArC<sup>3a</sup> (minor)), 123.4 (ArC<sup>5</sup>H (major)), 123.5 (ArC<sup>5</sup>H (minor)), 125.3 (ArC<sup>4</sup>H (minor)), 125.4 (ArC<sup>4</sup>H (major)), 125.6 (q, *J* 282.2, CF<sub>3</sub> (major)), 126.0 (q, *J* 282.0, CF<sub>3</sub> (minor)), 127.8 (PhC<sup>4</sup>H (major and minor)), 128.0 (PhC<sup>2,6</sup>H (major)), 128.1 (PhC<sup>2,6</sup>H (minor)), 128.8<sub>5</sub> (PhC<sup>3,5</sup>H (minor)), 128.8<sub>8</sub> (PhC<sup>3,5</sup>H (major)), 137.8 (PhC<sup>1</sup> (minor)), 137.9 (PhC<sup>1</sup> (major)), 139.0 (ArC<sup>6</sup>H (major)), 139.4 (ArC<sup>6</sup>H (minor)), 163.9 (COOEt (minor)), 164.2 (COOEt (major)), 167.6 (CONHBn (minor)),

168.2 (CONHBn (major)), 171.7 (ArC<sup>7a</sup> (major)), 172.8 (ArC<sup>7a</sup> (minor)), 192.4 (ArC<sup>4a</sup>CO (major)), 193.0 (ArC<sup>4a</sup>CO (minor)); <sup>19</sup>F NMR (471 MHz, CDCl<sub>3</sub>) δ<sub>F</sub>: -65.37 (0.45F, d, *J* 8.6, CF<sub>3</sub> (minor)), -65.34 (2.55F, d, *J* 8.5, CF<sub>3</sub> (major)); HRMS (ESI<sup>+</sup>) C<sub>22</sub>H<sub>20</sub>F<sub>3</sub>NO<sub>5</sub>Na [M+Na]<sup>+</sup> found 458.1176, requires 458.1186 (-2.14 ppm).

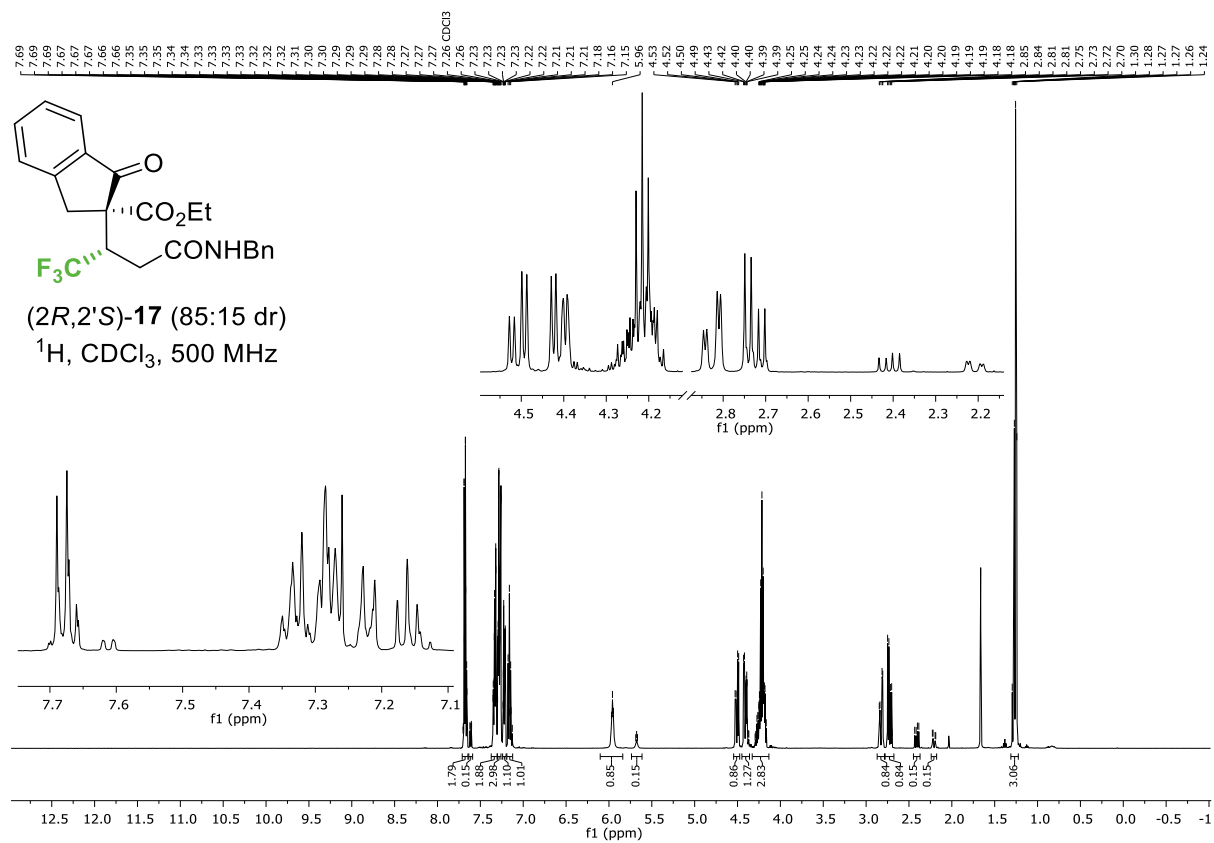



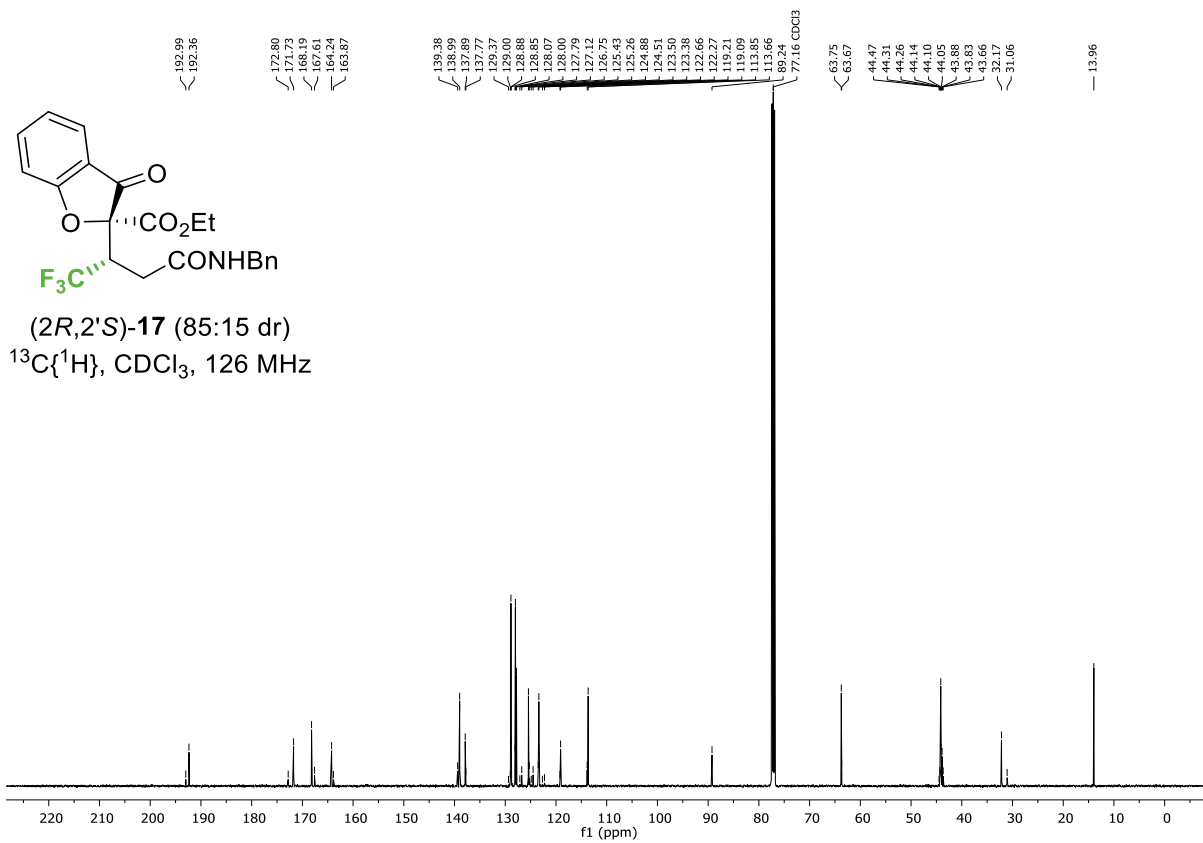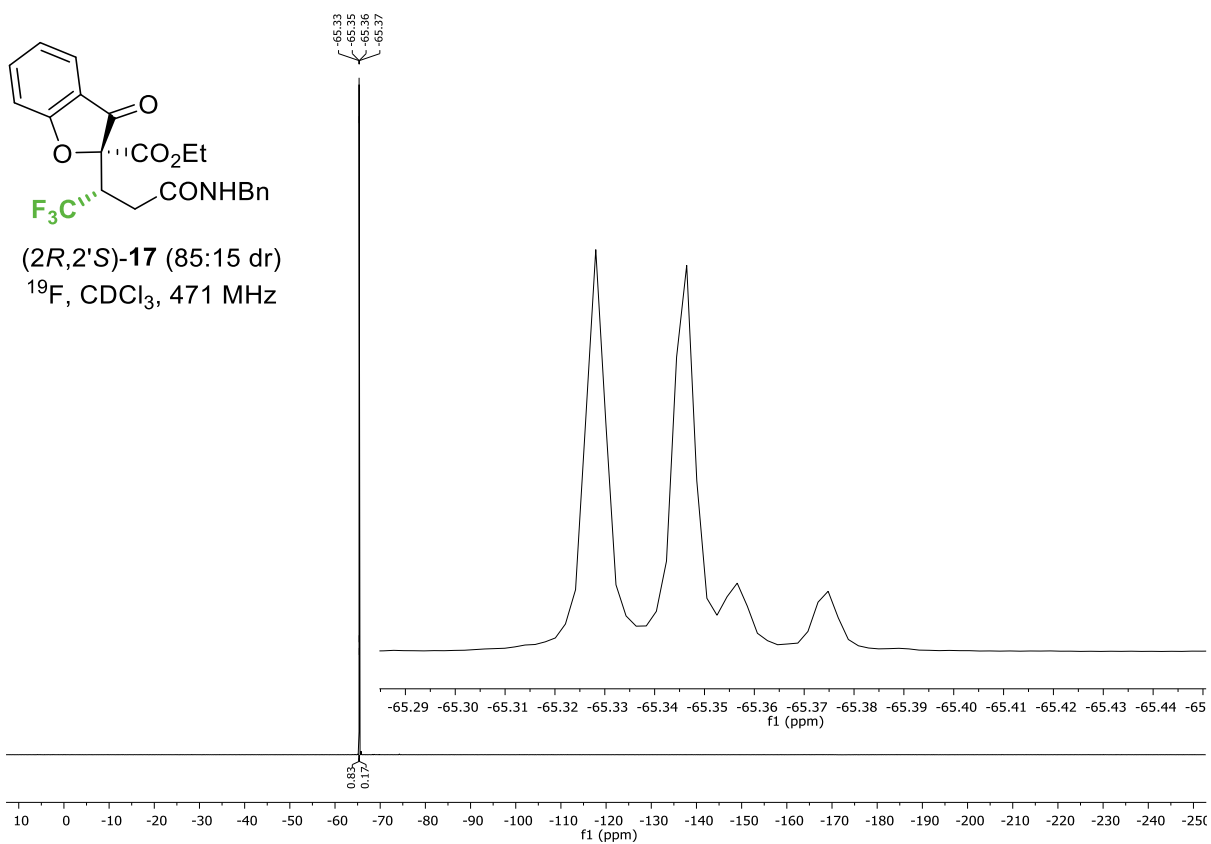

**HPLC Data for 17:** Chiralpak OD-H (95:5 hexane:*i*PrOH, flow rate 1.00 mL·min<sup>-1</sup>, 254 nm, 30 °C)  $t_R$  (2*R*,2'*S*)-17: 36.6 min,  $t_R$  (2*S*,2'*R*)-17: 41.7 min, 89:11 er;  $t_R$  *rel*-(2*S*,2'*S*)-17: 47.2 min,  $t_R$  *rel*-(2*R*,2'*R*)-17: 55.7 min, 94:6 er.

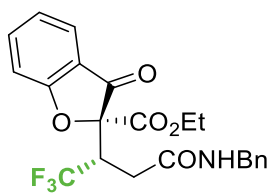

(2*R*,2'*S*)-17

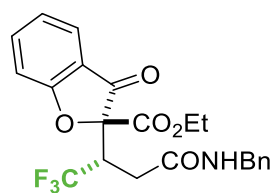

*rel*-(2*S*,2'*S*)-17

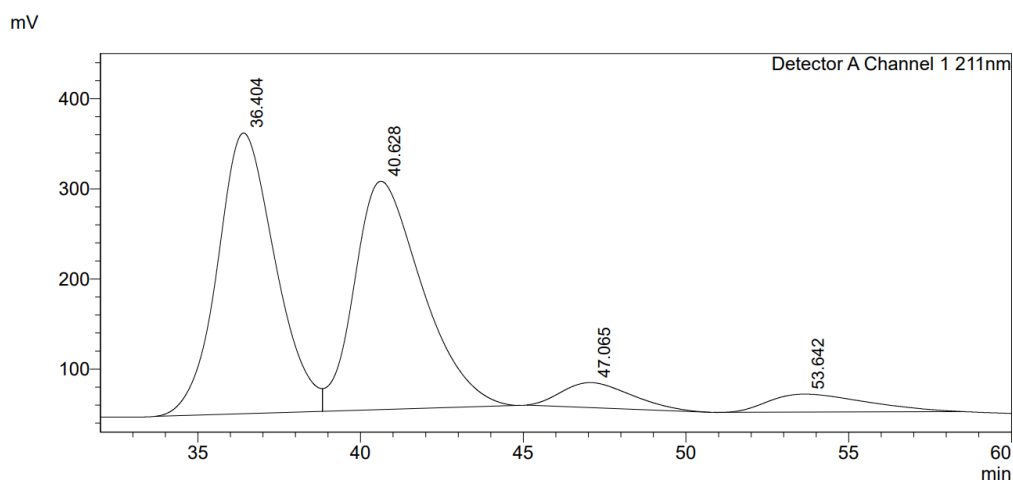

**<Peak Table>**

Detector A Channel 2 254nm

| Peak# | Ret. Time | Area%   |
|-------|-----------|---------|
| 1     | 36.407    | 43.447  |
| 2     | 40.625    | 43.327  |
| 3     | 47.065    | 7.379   |
| 4     | 53.647    | 5.848   |
| Total |           | 100.000 |

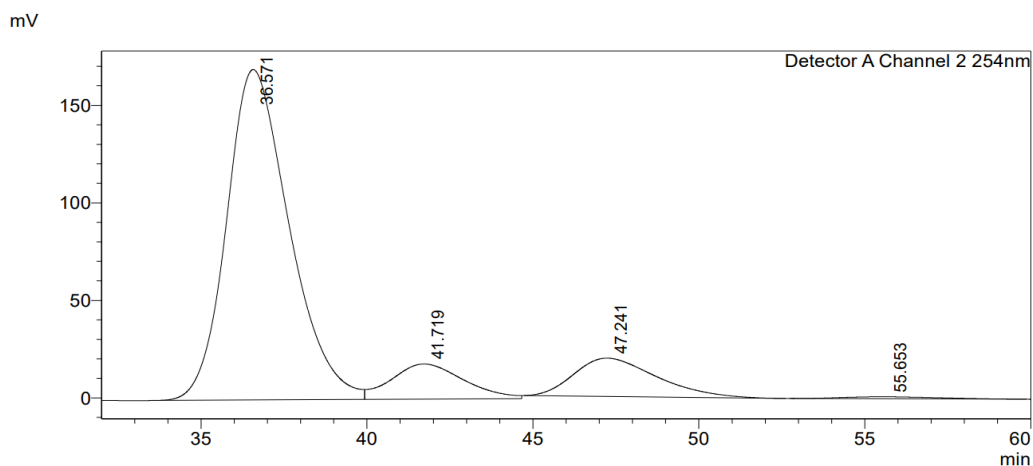

#### <Peak Table>

| Detector A Channel 2 254nm |           |         |
|----------------------------|-----------|---------|
| Peak#                      | Ret. Time | Area%   |
| 1                          | 36.571    | 77.748  |
| 2                          | 41.719    | 9.562   |
| 3                          | 47.241    | 11.941  |
| 4                          | 55.653    | 0.749   |
| Total                      |           | 100.000 |

(+)-Methyl (*S*)-1-acetyl-2-((*S*)-4'-(benzylamino)-1',1',1'-trifluoro-4'-oxobutan-2'-yl)-3-oxoindoline-2-carboxylate (*2S,2'S*)-**19**

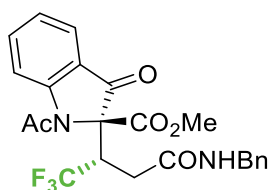

(*2S,2'S*)-**19**

#### Preparation from (*E*)-enoate:

The title compound was prepared according to **General Procedure 2**. A mixture of 4-nitrophenyl (*E*)-4,4,4-trifluorobut-2-enoate **8** (26.1 mg, 0.1 mmol), (*2S,3R*)-HyperBTM **1** (1.5 mg, 5  $\mu$ mol) and methyl 1-acetyl-3-oxoindoline-2-carboxylate **18** (23.3 mg, 0.1 mmol) in DMA (0.4 mL) was stirred for 16 h at room temperature. Benzylamine (11  $\mu$ L, 0.1 mmol) was added, and the reaction was permitted to stir for 1 h. The solution was diluted with EtOAc, washed sequentially with saturated aqueous Na<sub>2</sub>CO<sub>3</sub> ( $\times 3$ ) and brine, dried over MgSO<sub>4</sub> and filtered. The solvent was removed under reduced pressure and the residue was purified by column chromatography (1:1 EtOAc:Hexane) to give the title compound (30.9 mg, 67%, >95:5 d.r.) as white solid.

#### Gram-scale preparation from (*E*)-enoate:

The title compound was prepared according to **General Procedure 2**. A mixture of 4-nitrophenyl (*E*)-4,4,4-trifluorobut-2-enoate **8** (1.15 g, 4.4 mmol), (*2S,3R*)-HyperBTM **1** (67.8 mg, 0.22 mmol) and methyl 1-acetyl-3-oxindoline-2-carboxylate **18** (1.03 g, 4.4 mmol) in DMA (17.6 mL) was stirred for 16 h at room temperature. Benzylamine (0.48 mL, 4.4 mmol) was then added, and the reaction was permitted to stir for 1 h. The solution was diluted with EtOAc, washed sequentially with saturated aqueous Na<sub>2</sub>CO<sub>3</sub> (3×), brine, and dried over MgSO<sub>4</sub>. The solvent was removed under reduced pressure and crystallization from mixed solvent (1:2 EtOAc:Hexane) to give the title compound (1.73 g, 85%, >95:5 dr, 99:1 er) as yellow solid.

#### Preparation from (*Z*)-enoate:

A mixture of 4-nitrophenyl (*Z*)-4,4,4-trifluorobut-2-enoate **8** (26.1 mg, 0.1 mmol), (*2S,3R*)-HyperBTM **1** (1.5 mg, 5 μmol) and methyl 1-acetyl-3-oxindoline-2-carboxylate **18** (23.3 mg, 0.1 mmol) in DMA (0.4 mL) was stirred for 16 h at room temperature. Benzylamine (11 μL, 0.1 mmol) was added, and the reaction was permitted to stir for 1 h. The solution was diluted with EtOAc, washed sequentially with saturated aqueous Na<sub>2</sub>CO<sub>3</sub> (×3) and brine, dried over MgSO<sub>4</sub> and filtered. The solvent was removed under reduced pressure and the residue was purified by column chromatography (1:1 EtOAc:Hexane) to give the title compound (21.4 mg, 46%, >95:5 d.r.) as white solid.

*Data for (2S,2'S)-19*: mp 140-145 °C; [ $\alpha$ ]<sub>D</sub><sup>20</sup> +57.36 (*c* 0.53 in CHCl<sub>3</sub>); IR  $\nu_{\max}$  (film) / cm<sup>-1</sup> 3323, 2953, 2021, 1759, 1715, 1670, 1373, 1279, 1121, 1051, 966, 764; <sup>1</sup>H NMR (500 MHz, CDCl<sub>3</sub>)  $\delta$ <sub>H</sub>: 2.37 (1H, dd, *J* 16.6, 8.9, CHCH<sub>A</sub>H<sub>B</sub>CONH), 2.56 (3H, s, NCOCH<sub>3</sub>), 3.66 (3H, s, COOCH<sub>3</sub>), 3.72 (1H, d, *J* 16.5, CHCH<sub>A</sub>H<sub>B</sub>CONH), 4.46 (1H, dd, *J* 14.8, 5.4, NHCH<sub>A</sub>H<sub>B</sub>Ph), 4.57 (1H, dd, *J* 14.8, 6.0, NHCH<sub>A</sub>H<sub>B</sub>Ph), 4.66 (1H, qdd, *J* 9.9, 8.9, 1.6, CHCH<sub>2</sub>CONH), 6.19 (1H, s (br), NH), 7.22-7.29 (2H, m, PhC<sup>4</sup>H, ArC<sup>5</sup>H), 7.29-7.37 (4H, m, PhC<sup>2,3,5,6</sup>H), 7.54 (1H, s (br), ArC<sup>7</sup>H), 7.73 (1H, ddd, *J* 8.6, 7.3, 1.4, ArC<sup>6</sup>H), 7.78 (1H, d, *J* 7.6, ArC<sup>4</sup>H); <sup>13</sup>C{<sup>1</sup>H} NMR (126 MHz, CDCl<sub>3</sub>)  $\delta$ <sub>C</sub>: 25.9 (COCH<sub>3</sub>), 31.4 (CHCH<sub>2</sub>CONH), 42.6 (q, *J* 25.5, CHCH<sub>2</sub>CONH), 43.9 (NHCH<sub>2</sub>Ph), 71.4 (CCOOMe), 115.0 (PhC<sup>7</sup>H), 124.1 (ArC<sup>3a</sup>), 124.4 (ArC<sup>5</sup>H), 125.8 (ArC<sup>4</sup>H), 126.5 (q, *J* 280.8, CF<sub>3</sub>), 127.5 (PhC<sup>4</sup>H), 127.9 (PhC<sup>2,6</sup>H), 128.8 (PhC<sup>3,5</sup>H), 137.9 (ArC<sup>6</sup>H), 138.5 (PhC<sup>1</sup>), 151.6 (ArC<sup>7a</sup>), 166.1 (CCOOMe), 168.7 (NCOMe), 169.7 (CONHBn), 192.0 (COCH<sub>2</sub>CH<sub>2</sub>); <sup>19</sup>F NMR (471 MHz, CDCl<sub>3</sub>)  $\delta$ <sub>F</sub>: -66.23 (s, CF<sub>3</sub>). HRMS (ESI<sup>+</sup>) C<sub>23</sub>H<sub>22</sub>F<sub>3</sub>O<sub>5</sub>N<sub>2</sub> [M+H]<sup>+</sup> found 463.1470, requires 463.1475 (-2.2 ppm).

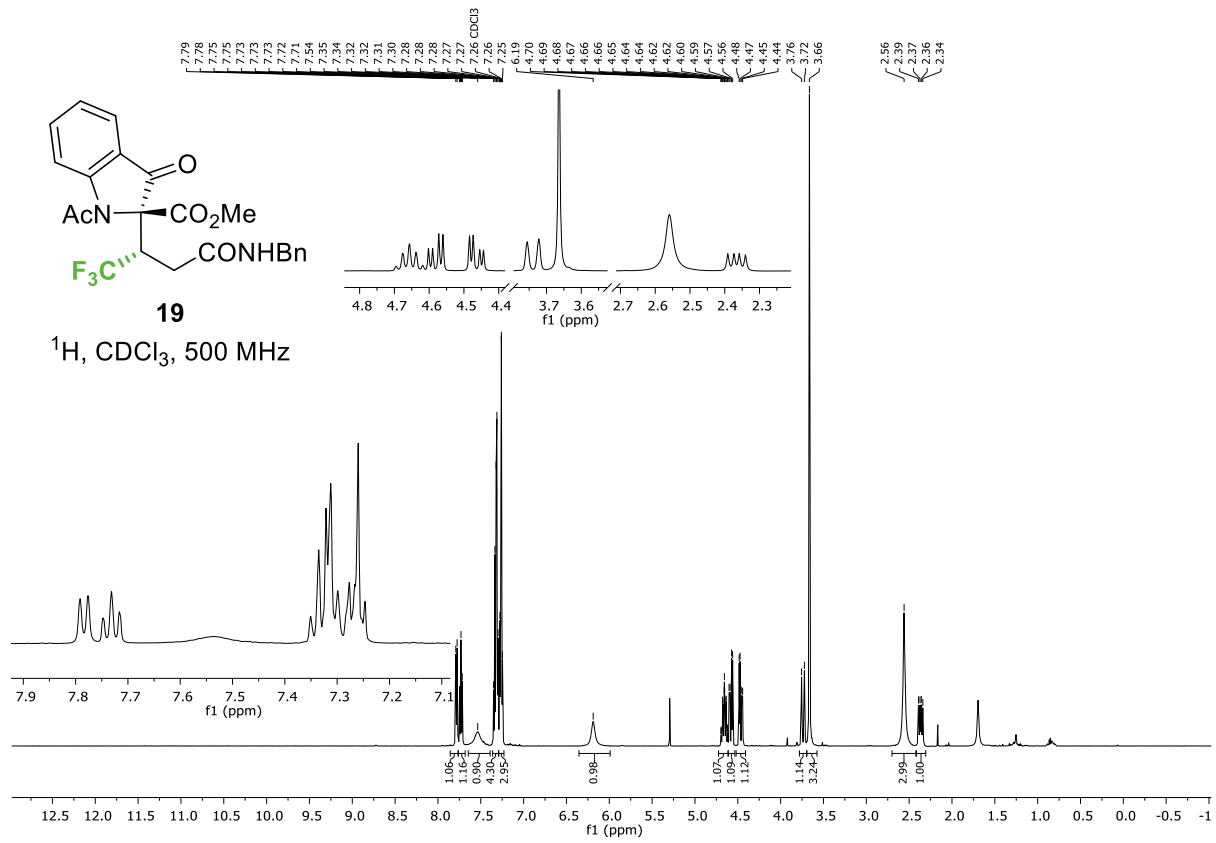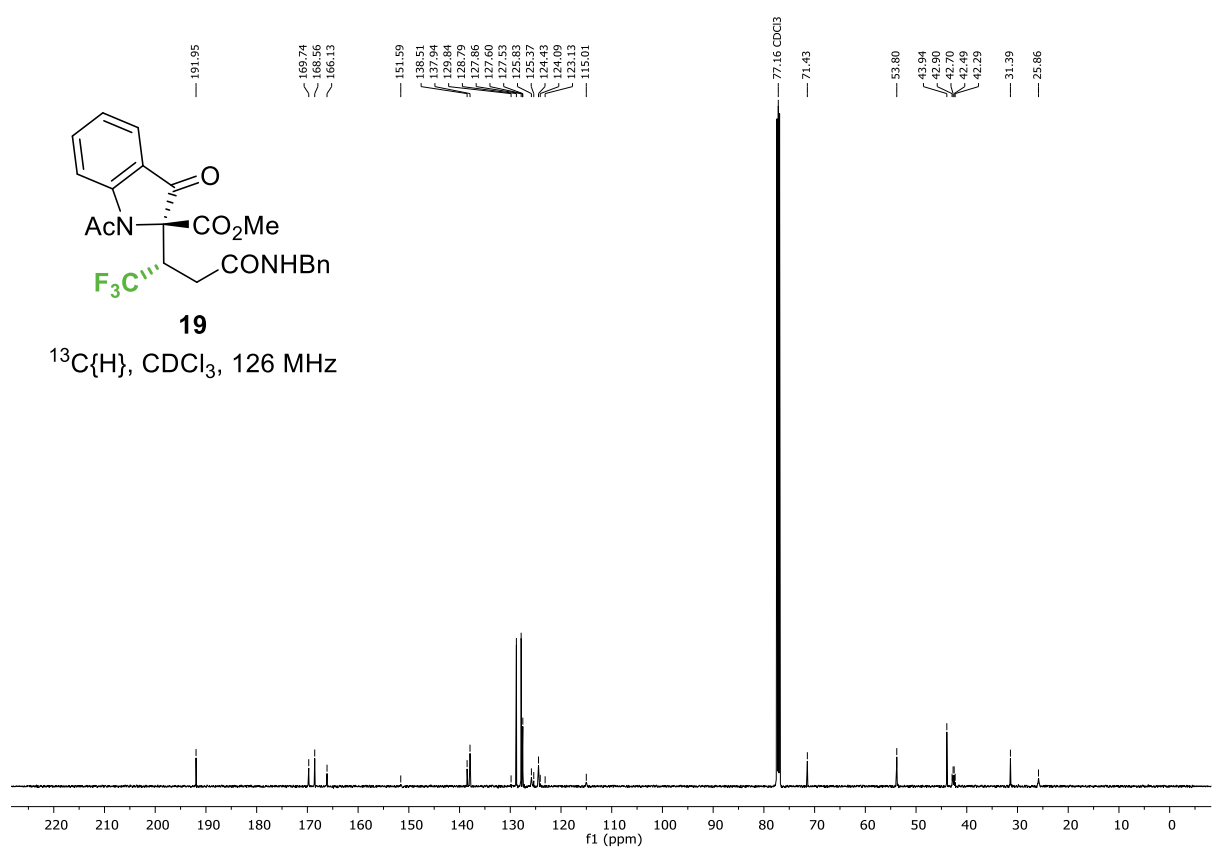

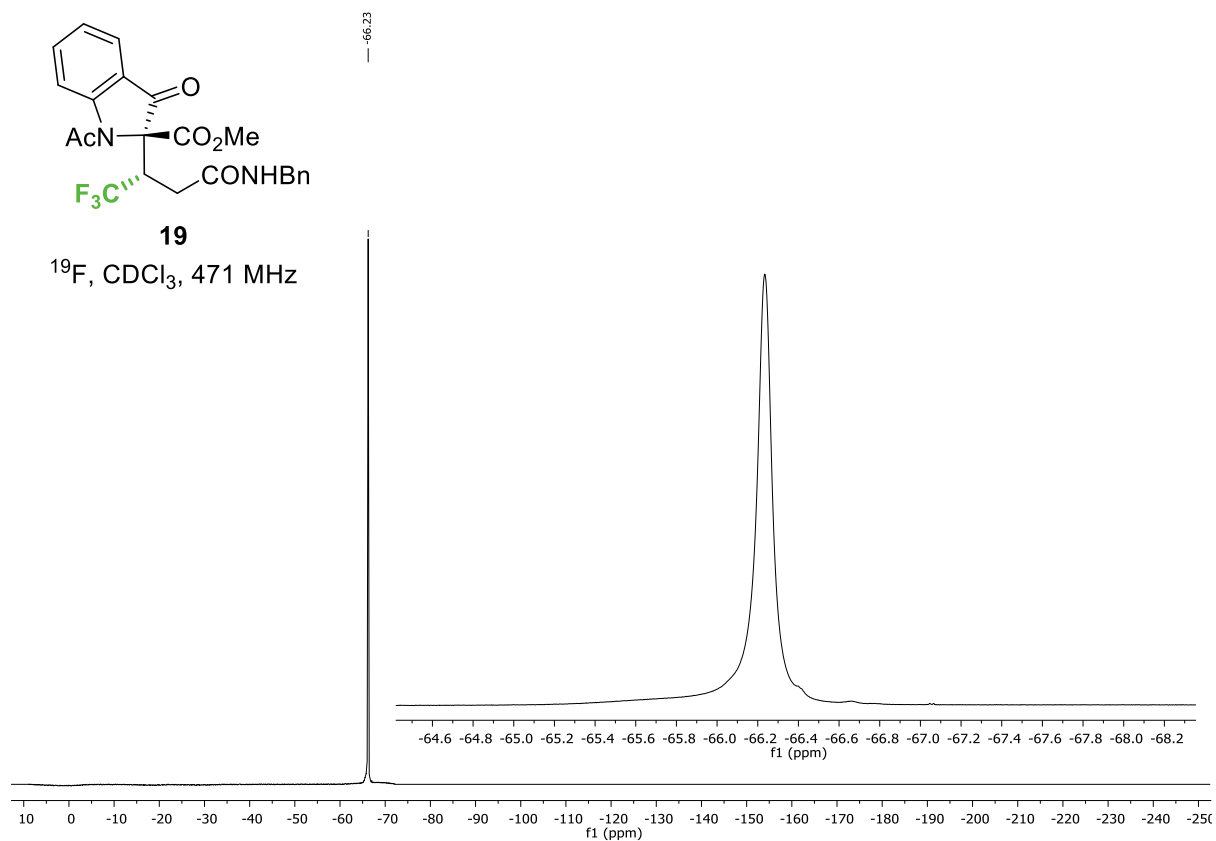

**HPLC Data for 19 from (*E*)-ester:** Chiralpak AD-H (90:10 hexane:*i*PrOH, flow rate  $1.00 \text{ mL} \cdot \text{min}^{-1}$ , 270 nm,  $30 \text{ }^\circ\text{C}$ )  $t_{\text{R}}$  (*2S,2'S*)-**19**: 49.4 min,  $t_{\text{R}}$  (*2R,2'R*)-**19**: 75.7 min, 98:2 er.

**HPLC Data for 19 from (*E*)-ester gram-scale:** Chiralpak AD-H (90:10 hexane:*i*PrOH, flow rate  $1.00 \text{ mL} \cdot \text{min}^{-1}$ , 270 nm,  $30 \text{ }^\circ\text{C}$ )  $t_{\text{R}}$  (*2S,2'S*)-**19**: 49.4 min,  $t_{\text{R}}$  (*2R,2'R*)-**19**: 75.7 min, 98:2 er.

**HPLC Data for 19 from (*Z*)-ester:** Chiralpak AD-H (90:10 hexane:*i*PrOH, flow rate  $1.00 \text{ mL} \cdot \text{min}^{-1}$ , 270 nm,  $30 \text{ }^\circ\text{C}$ )  $t_{\text{R}}$  (*2S,2'S*)-**19**: 50.7 min,  $t_{\text{R}}$  (*2R,2'R*)-**19**: 73.5 min, 54:46 er.

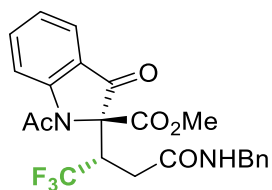

**(*2S,2'S*)-19**

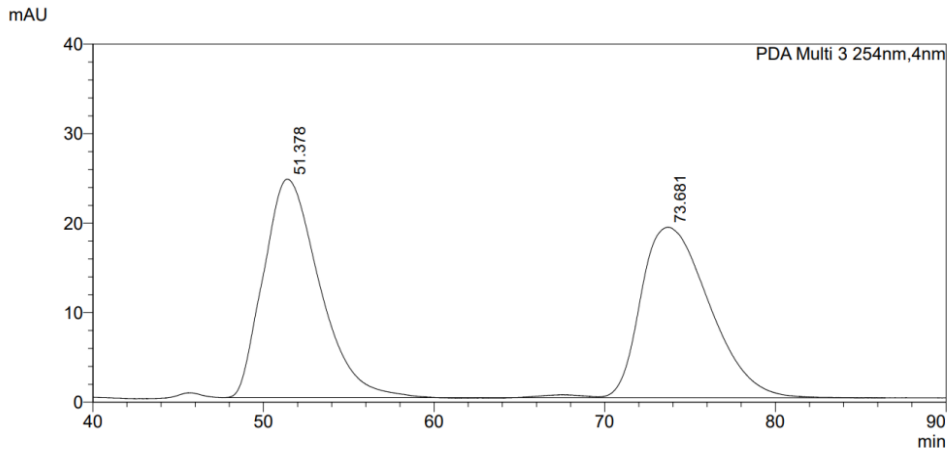

**<Peak Table>**

PDA Ch3 254nm

| Peak# | Ret. Time | Area%   |
|-------|-----------|---------|
| 1     | 51.378    | 51.052  |
| 2     | 73.681    | 48.948  |
| Total |           | 100.000 |

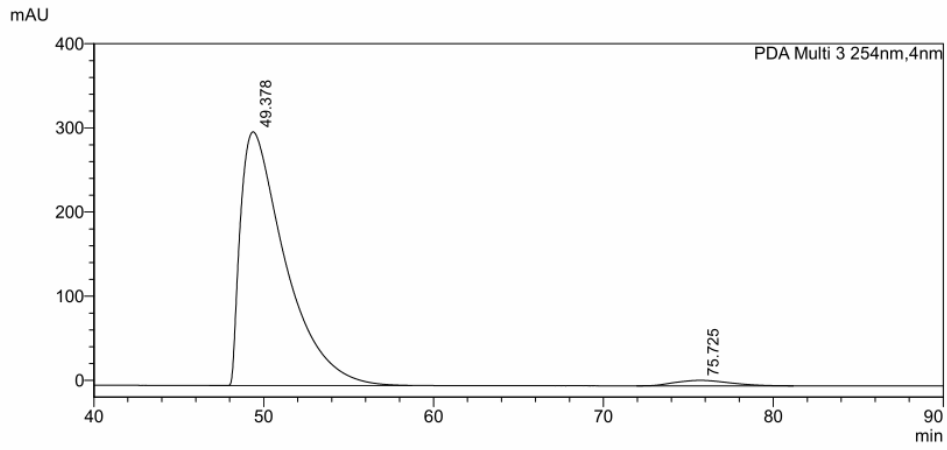

**<Peak Table>**

PDA Ch3 254nm

| Peak# | Ret. Time | Area%   |
|-------|-----------|---------|
| 1     | 49.378    | 97.412  |
| 2     | 75.725    | 2.588   |
| Total |           | 100.000 |

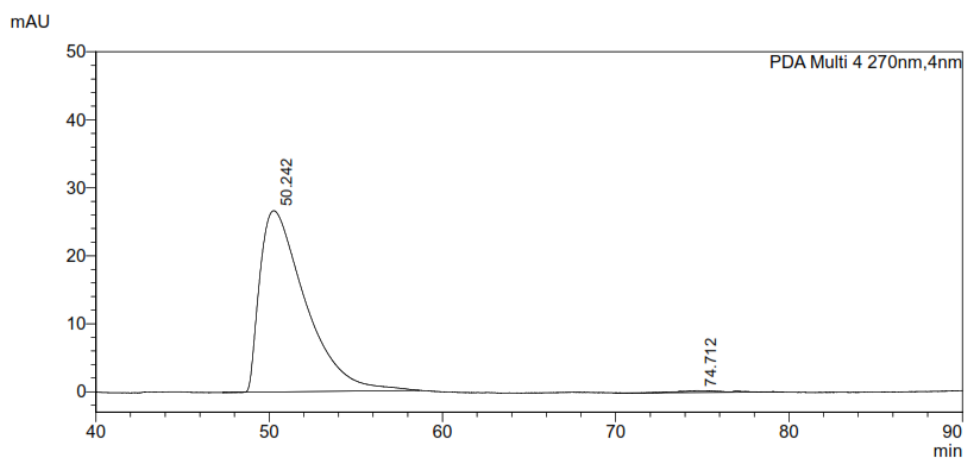

**<Peak Table>**

PDA Ch4 270nm

| Peak# | Ret. Time | Area%   |
|-------|-----------|---------|
| 1     | 50.242    | 98.830  |
| 2     | 74.712    | 1.170   |
| Total |           | 100.000 |

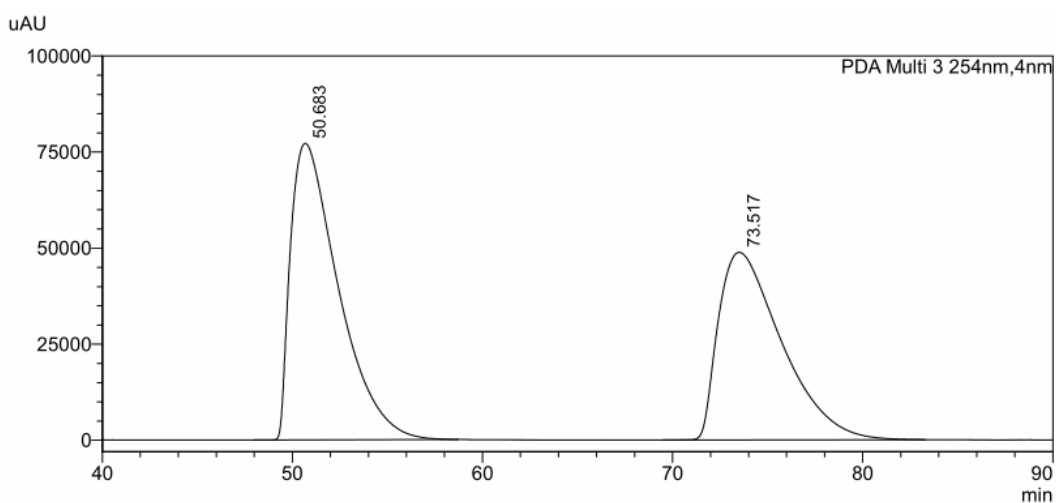

**<Peak Table>**

PDA Ch3 254nm

| Peak# | Ret. Time | Area%   |
|-------|-----------|---------|
| 1     | 50.683    | 54.447  |
| 2     | 73.517    | 45.553  |
| Total |           | 100.000 |

(-)-Methyl (S)-1-acetyl-2-((S)-4-(benzylamino)-1-chloro-1,1-difluoro-4-oxobutan-2-yl)-3-oxoindoline-2-carboxylate (2S,2'S)-20

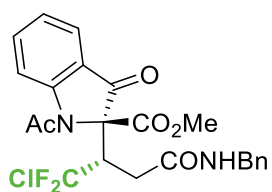



(2*S*,2'*S*)-**20**

The title compound was prepared according to **General Procedure 2**. A mixture of 4-nitrophenyl (*E*)-4-chloro-4,4-difluorobut-2-enoate **S1** (27.7 mg, 0.1 mmol), (2*S*,3*R*)-HyperBTM **1** (1.5 mg, 5  $\mu$ mol) and methyl 1-acetyl-3-oxoindoline-2-carboxylate **18** (23.3 mg, 0.1 mmol) in DMA (0.4 mL) was stirred for 16 h at room temperature. Benzylamine (11  $\mu$ L, 0.1 mmol) was added, and the reaction was permitted to stir for 1 h. The solution was diluted with EtOAc, washed sequentially with saturated aqueous Na<sub>2</sub>CO<sub>3</sub> ( $\times$ 3) and brine, dried over MgSO<sub>4</sub> and filtered. The solvent was removed under reduced pressure and the residue was purified by column chromatography (1:1 EtOAc:Hexane) to give the title compound (27.0 mg, 56%, >95:5 d.r.) as white solid.

*Data for (2S,2'S)-20*: mp 138-142  $^{\circ}$ C;  $[\alpha]_D^{20}$  -42.83 (*c* 0.60 in CHCl<sub>3</sub>); IR  $\nu_{\max}$  (film) / cm<sup>-1</sup> 3312, 2953, 1755, 1715, 1670, 1655, 1470, 1375, 1277, 1238, 945, 901; <sup>1</sup>H NMR (500 MHz, CDCl<sub>3</sub>)  $\delta_H$ : 2.42 (1H, dd, *J* 16.8, 8.3, CHCH<sub>A</sub>H<sub>B</sub>CONH), 2.56 (3H, s, NCOCH<sub>3</sub>), 3.65 (3H, s, COOCH<sub>3</sub>), 3.85 (1H, dq, *J* 16.8, 2.0, CHCH<sub>A</sub>H<sub>B</sub>CONH), 4.48 (1H, dd, *J* 14.8, 5.4, NHCH<sub>A</sub>H<sub>B</sub>Ph), 4.59 (1H, dd, *J* 14.8, 6.0, NHCH<sub>A</sub>H<sub>B</sub>Ph), 4.79 (1H, dddd, *J* 12.3, 8.4, 6.9, 1.5, CHCH<sub>2</sub>CONH), 6.30 (1H, s (br), NH), 7.23-7.29 (2H, m, PhC<sup>4</sup>H, ArC<sup>5</sup>H), 7.29-7.36 (4H, m, PhC<sup>2,3,5,6</sup>H), 7.53 (1H, s (br), ArC<sup>7</sup>H), 7.73 (1H, ddd, *J* 8.6, 7.3, 1.5, ArC<sup>6</sup>H), 7.78 (1H, d (br), *J* 7.7, ArC<sup>4</sup>H); <sup>13</sup>C {<sup>1</sup>H} NMR (126 MHz, CDCl<sub>3</sub>)  $\delta_C$ : 26.0 (NCOCH<sub>3</sub>), 32.9 (CHCH<sub>2</sub>CONH), 43.8 (NHCH<sub>2</sub>Ph), 48.6 (dd, *J* 22.9, 21.3, CHCH<sub>2</sub>CONH), 53.8 (COOCH<sub>3</sub>), 72.1 (d, *J* 3.7, CCOOMe), 115.0 (ArC<sup>7</sup>H), 124.4 (ArC<sup>5</sup>H), 124.8 (ArC<sup>3a</sup>), 125.7 (ArC<sup>4</sup>H), 127.5 (PhC<sup>4</sup>H), 127.9 (PhC<sup>2,6</sup>H), 128.8 (PhC<sup>3,5</sup>H), 130.0 (app t, *J* 297.0, CF<sub>2</sub>Cl), 137.8 (ArC<sup>6</sup>H), 138.4 (PhC<sup>1</sup>), 151.6 (ArC<sup>7a</sup>), 166.3 (COOMe), 168.8 (NCOMe), 169.9 (CONHBn), 192.1 (ArCOC); <sup>19</sup>F NMR (471 MHz, CDCl<sub>3</sub>)  $\delta_F$ : -50.48 (1F, dd, *J* 170.8, 12.4, CF<sub>A</sub>F<sub>B</sub>Cl), -48.83 (1F, dd, *J* 170.5, 6.6, CF<sub>A</sub>F<sub>B</sub>Cl); HRMS (ESI<sup>+</sup>) C<sub>23</sub>H<sub>22</sub>F<sub>2</sub>O<sub>5</sub>N<sub>2</sub>Cl [M+H]<sup>+</sup> found 479.1180, requires 479.1180 (+0.04 ppm).

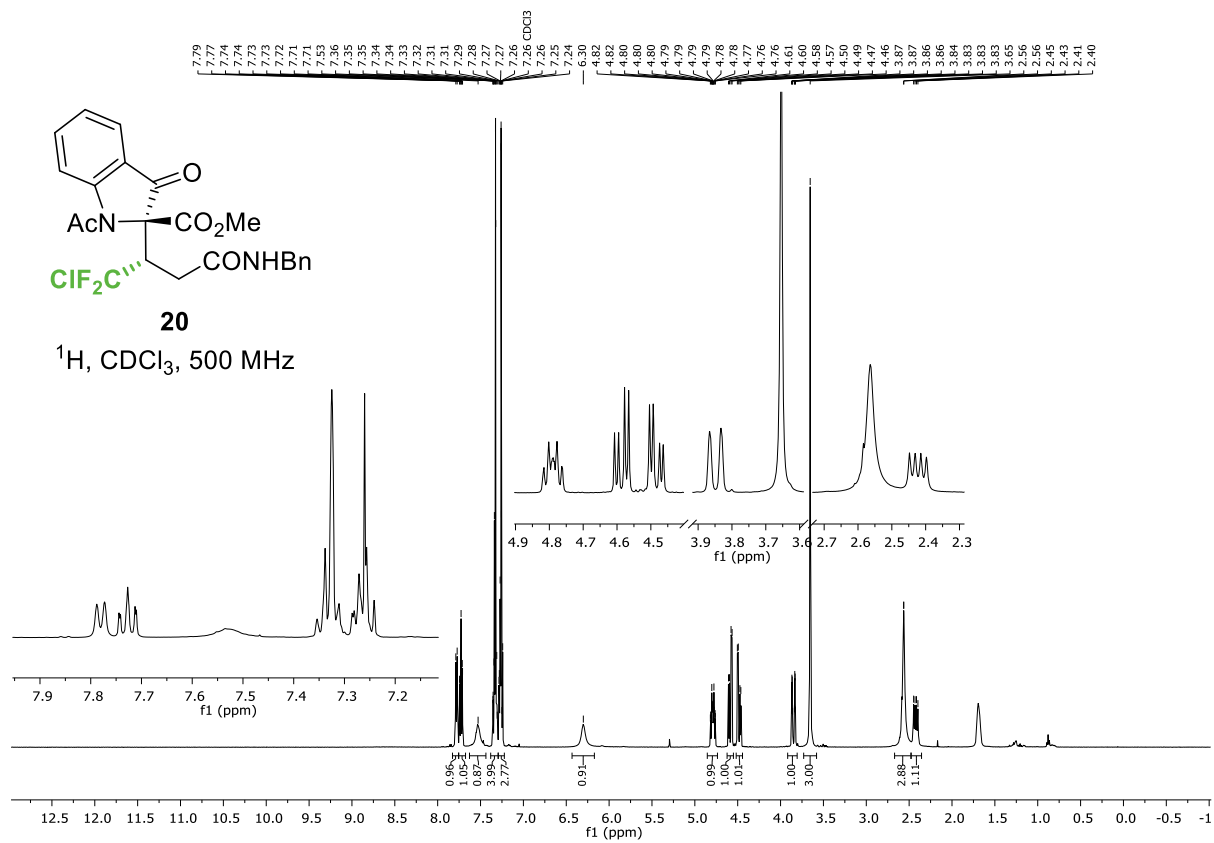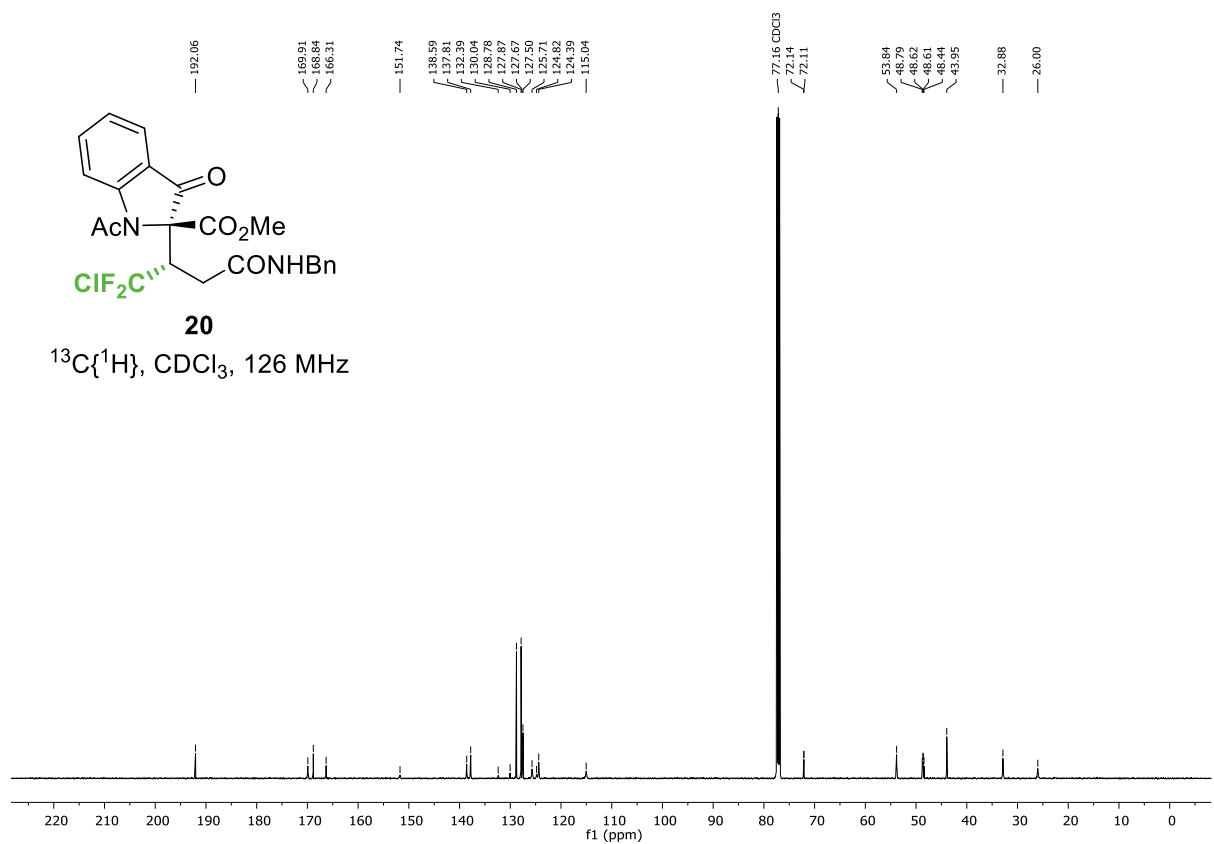

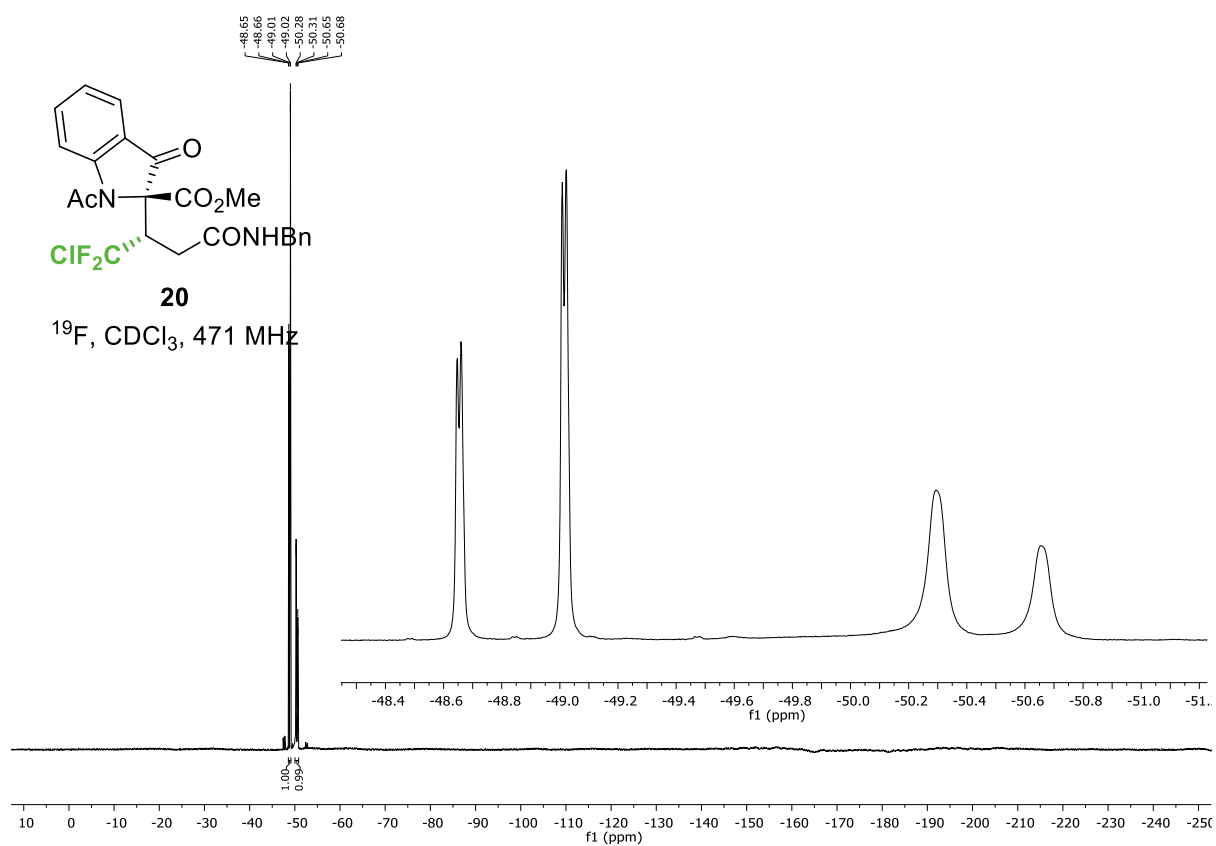

**HPLC Data for 20:** Chiralpak OD-H (90:10 hexane:<sup>i</sup>PrOH, flow rate 1.00 mL·min<sup>-1</sup>, 270 nm, 30 °C)  
*t<sub>R</sub>* (2*R*,2'*R*)-**20**: 41.3 min, *t<sub>R</sub>* (2*S*,2'*S*)-**20**: 57.2 min, 98:2 er.

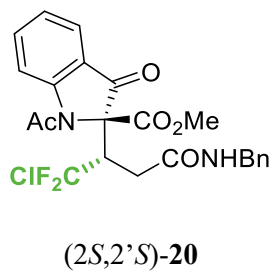

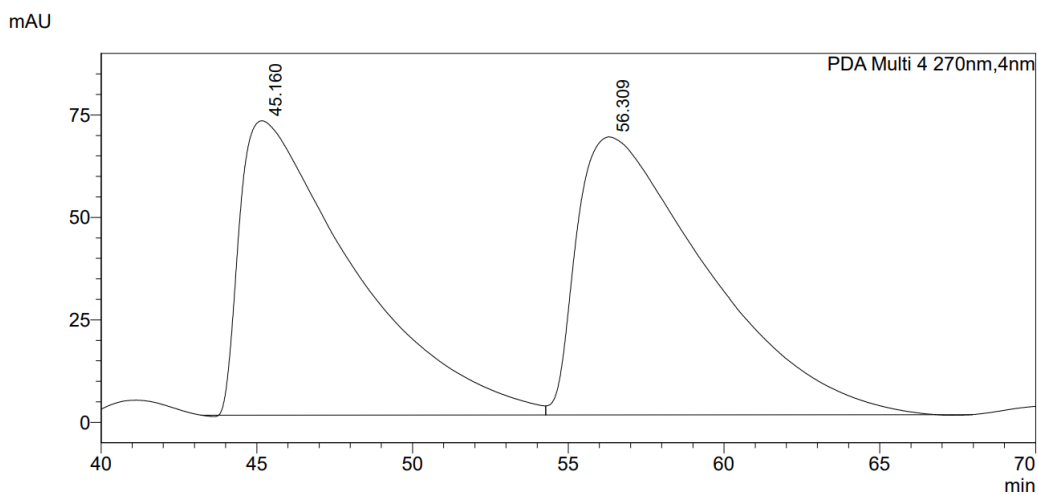

**<Peak Table>**

PDA Ch4 270nm

| Peak# | Ret. Time | Area%   |
|-------|-----------|---------|
| 1     | 45.160    | 48.113  |
| 2     | 56.309    | 51.887  |
| Total |           | 100.000 |

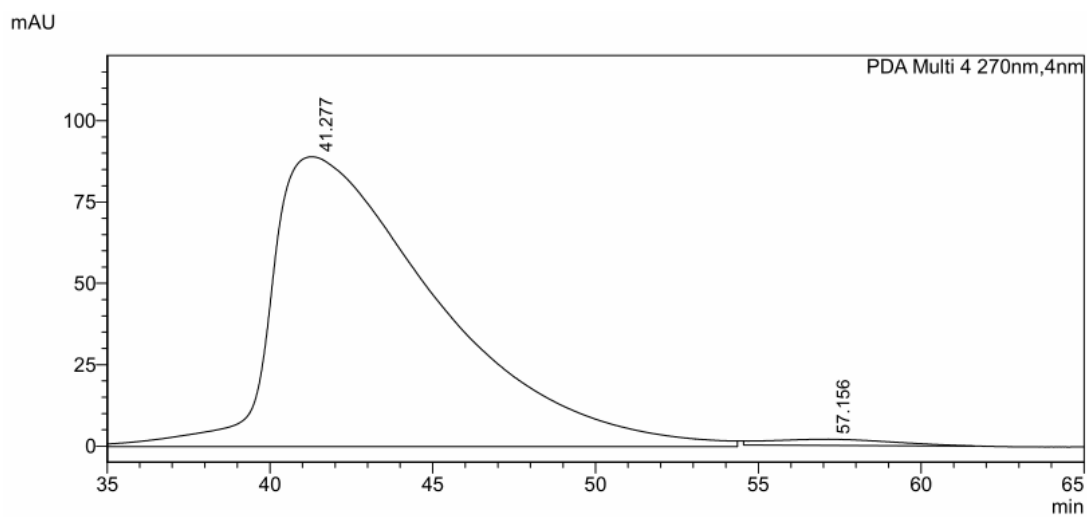

**<Peak Table>**

PDA Ch4 270nm

| Peak# | Ret. Time | Area%   |
|-------|-----------|---------|
| 1     | 41.277    | 98.422  |
| 2     | 57.156    | 1.578   |
| Total |           | 100.000 |

(-)-Methyl (S)-1-acetyl-2-((S)-4'-(benzylamino)-1'-bromo-1',1'-difluoro-4'-oxobutan-2'-yl)-3-oxoindoline-2-carboxylate (2S,2'S)-21

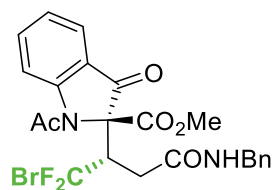

(2S,2'S)-21

The title compound was prepared according to **General Procedure 2**. A mixture of 4-nitrophenyl (*E*)-4-bromo-4,4-difluorobut-2-enoate **S2** (32.1 mg, 0.1 mmol), (2*S*,3*R*)-HyperBTM **1** (1.5 mg, 5  $\mu$ mol) and methyl 1-acetyl-3-oxoindoline-2-carboxylate **18** (23.3 mg, 0.1 mmol) in DMA (0.4 mL) was stirred for 16 h at room temperature. Benzylamine (11  $\mu$ L, 0.1 mmol) was added, and the reaction was permitted to stir for 1 h. The solution was diluted with EtOAc, washed sequentially with saturated aqueous Na<sub>2</sub>CO<sub>3</sub> ( $\times$ 3) and brine, dried over MgSO<sub>4</sub> and filtered. The solvent was removed under reduced pressure and the residue was purified by column chromatography (1:1 EtOAc:Hexane) to give the title compound (26.2 mg, 50%, >95:5 d.r.) as white solid.

*Data for (2S,2'S)-21*: mp 140-145  $^{\circ}$ C;  $[\alpha]_D^{20}$  -43.28 (*c* 1.16 in CHCl<sub>3</sub>); IR  $\nu_{\max}$  (film) / cm<sup>-1</sup> 3312, 2953, 1755, 1717, 1670, 1655, 1470, 1375, 1238, 893, 770; <sup>1</sup>H NMR (500 MHz, CDCl<sub>3</sub>)  $\delta_H$ : 2.42 (1H, dd, *J* 16.9, 8.0, CHCH<sub>A</sub>H<sub>B</sub>CONH), 2.56 (3H, s (br), NCOCH<sub>3</sub>), 3.65 (3H, s, COOCH<sub>3</sub>), 3.87 (1H, dq, *J* 16.9, 1.7, CHCH<sub>A</sub>H<sub>B</sub>CONH), 4.49 (1H, dd, *J* 14.8, 5.5, NHCH<sub>A</sub>H<sub>B</sub>Ph), 4.58 (1H, dd, *J* 14.8, 6.0, NHCH<sub>A</sub>H<sub>B</sub>Ph), 4.78 (1H, dddd, *J* 13.6, 7.8, 7.7, 1.6, CHCH<sub>2</sub>CONH), 6.31 (1H, s (br), NH), 7.23-7.30 (2H, m, PhC<sup>4</sup>H, ArC<sup>5</sup>H), 7.30-7.36 (4H, PhC<sup>2,3,5,6</sup>H), 7.53 (1H, s (br), ArC<sup>7</sup>H), 7.73 (1H, ddd, *J* 8.6, 7.3, 1.5, ArC<sup>6</sup>H), 7.78 (1H, d (br), *J* 7.7, ArC<sup>4</sup>H); <sup>13</sup>C {<sup>1</sup>H} NMR (126 MHz, CDCl<sub>3</sub>)  $\delta_C$ : 26.0 (NCOCH<sub>3</sub>), 33.5 (CHCH<sub>2</sub>CONH), 44.0 (NHCH<sub>2</sub>Ph), 50.0 (dd, *J* 21.3, 18.2, CHCH<sub>2</sub>CONH), 53.8 (COOCH<sub>3</sub>), 72.3 (CCOOMe), 115.1 (ArC<sup>7</sup>H), 123.3 (app t, *J* 309.8, CBrF<sub>2</sub>), 124.4 (ArC<sup>5</sup>H), 125.2 (ArC<sup>3a</sup>), 125.7 (ArC<sup>4</sup>H), 127.5 (PhC<sup>4</sup>H), 127.9 (PhC<sup>2,6</sup>H), 128.8 (PhC<sup>3,5</sup>H), 137.8 (ArC<sup>6</sup>H), 138.6 (PhC<sup>1</sup>), 151.8 (ArC<sup>7a</sup>), 166.2 (NCOMe), 168.9 (COOMe), 169.8 (CONH), 192.0 (ArCOC); <sup>19</sup>F NMR (471 MHz, CDCl<sub>3</sub>)  $\delta_F$ : -43.61 (1F, d, *J* 167.4, CF<sub>A</sub>F<sub>B</sub>Br), -41.8 (1F, d, *J* 167.4, CF<sub>A</sub>F<sub>B</sub>Br); HRMS (ESI<sup>+</sup>) C<sub>23</sub>H<sub>22</sub>F<sub>2</sub>O<sub>5</sub>N<sub>2</sub>Br [M+H]<sup>+</sup> found 523.0675, requires 523.0663 (-2.2 ppm).

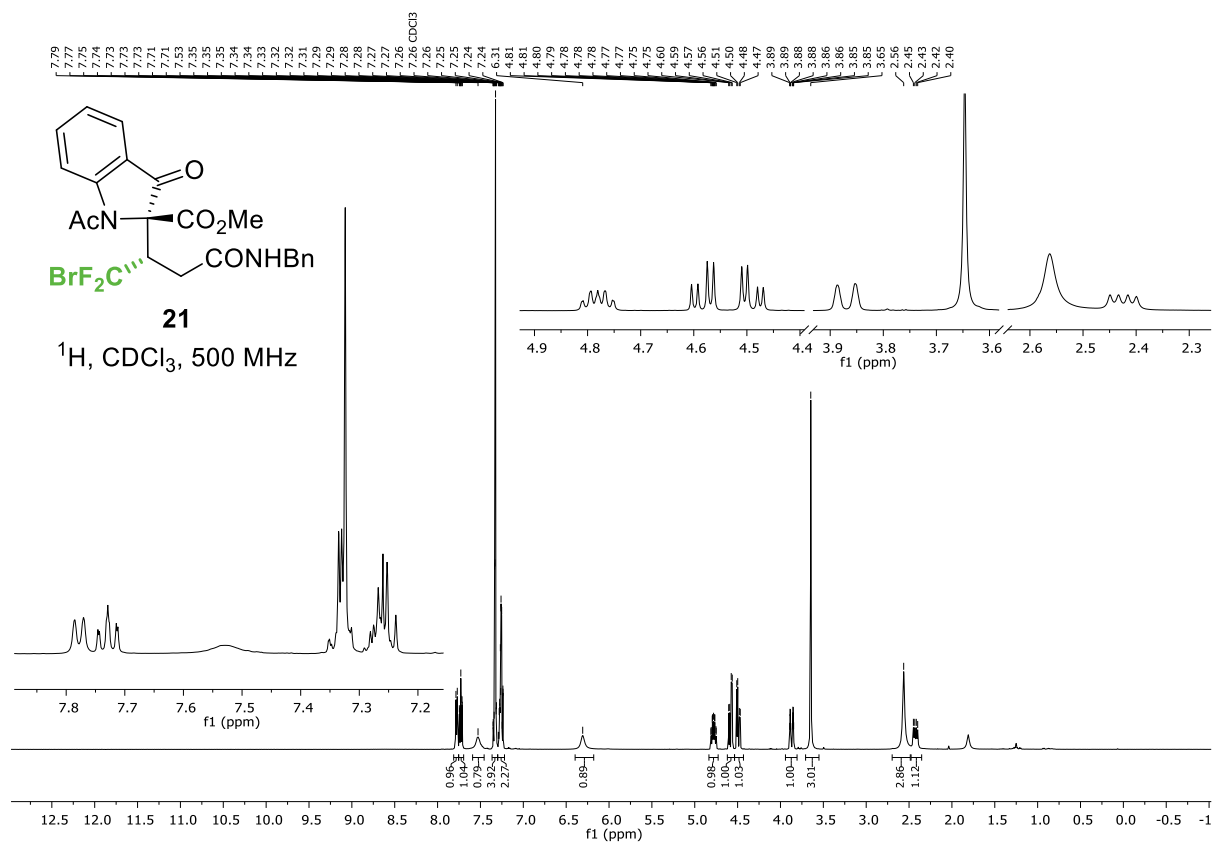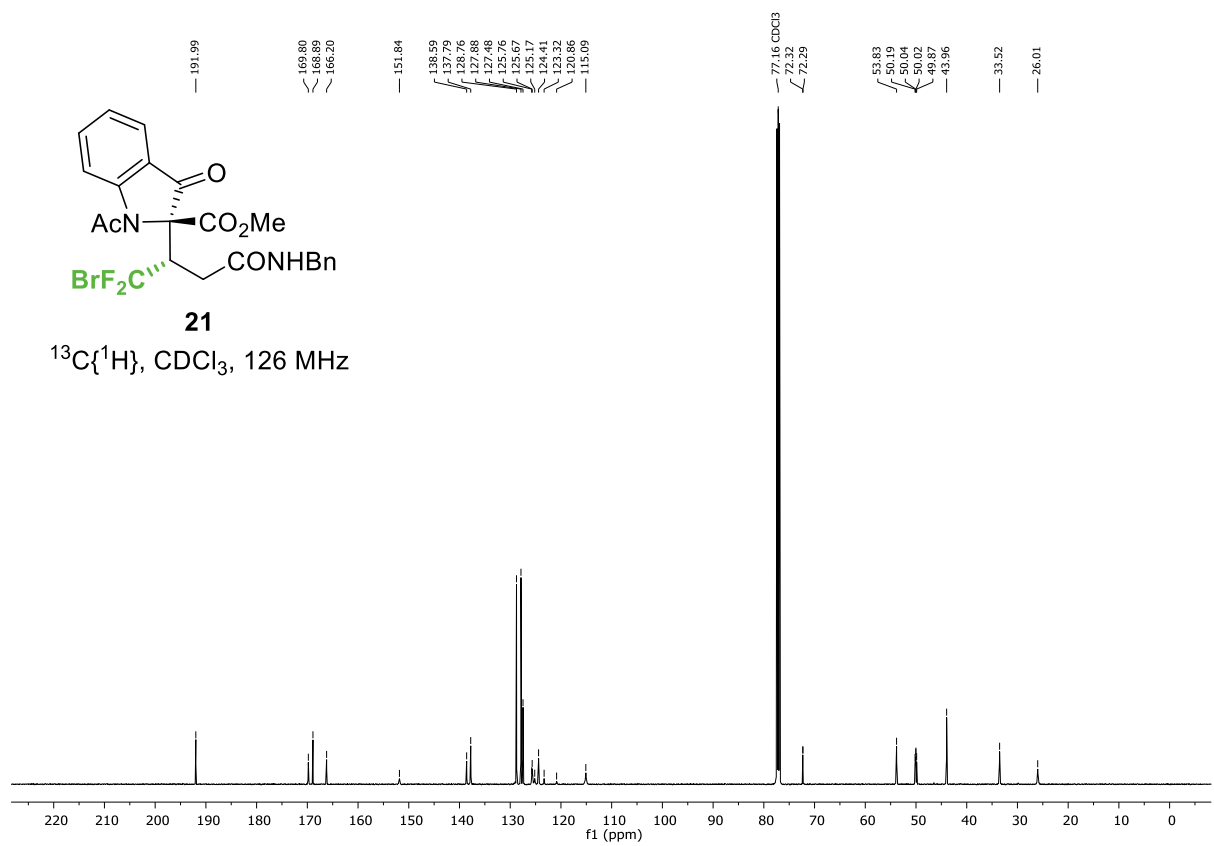

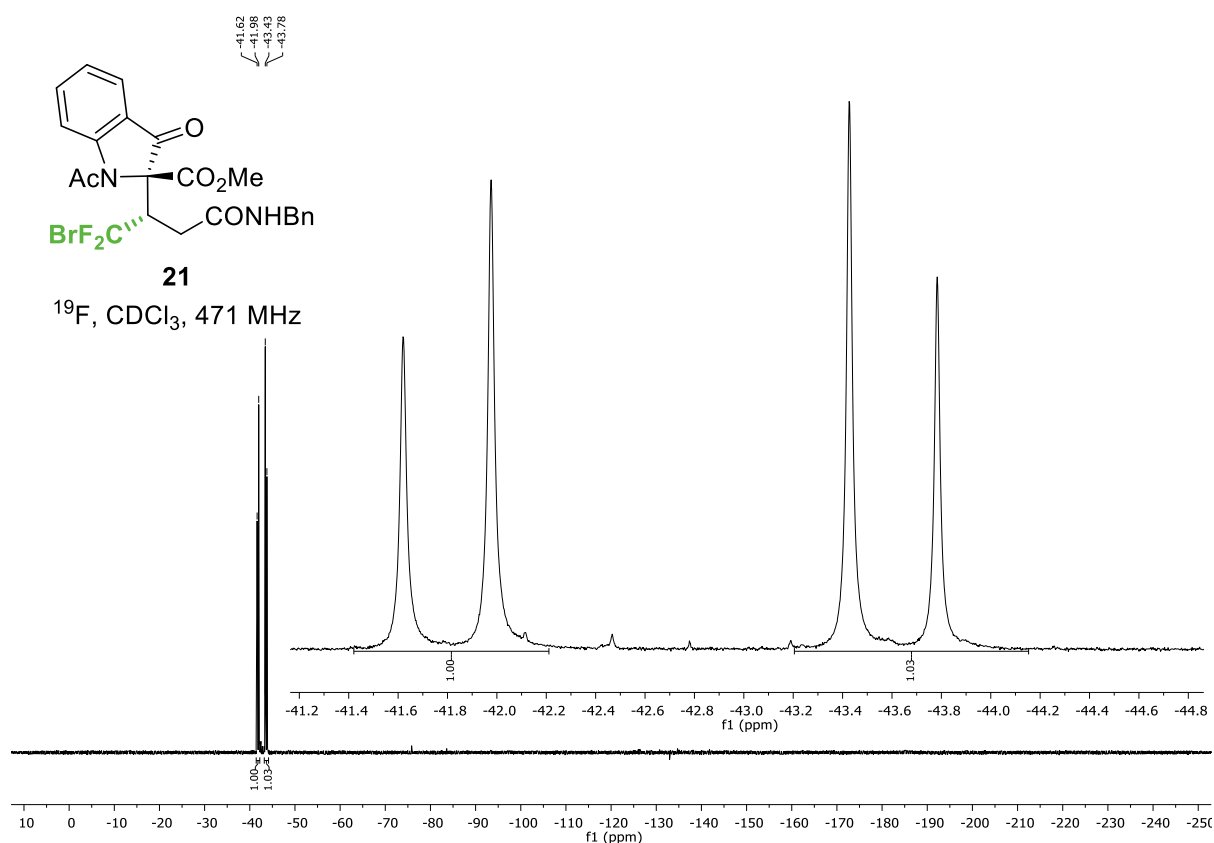

**HPLC Data for 21:** Chiralpak OD-H (90:10 hexane:<sup>i</sup>PrOH, flow rate 1.00 mL·min<sup>-1</sup>, 254 nm, 30 °C)

$t_R$  (2*S*,2'*S*)-**21**: 46.9 min,  $t_R$  (2*R*,2'*R*)-**21**: 63.7 min, 96:4 er.

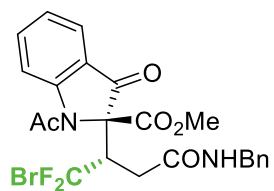

(2*S*,2'*S*)-**21**

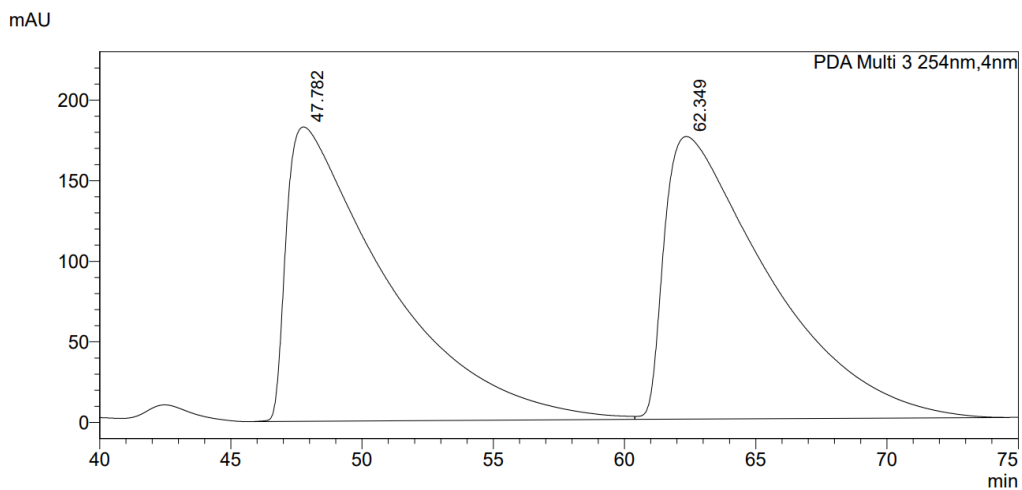

**<Peak Table>**

PDA Ch3 254nm

| Peak# | Ret. Time | Area%   |
|-------|-----------|---------|
| 1     | 47.782    | 49.940  |
| 2     | 62.349    | 50.060  |
| Total |           | 100.000 |

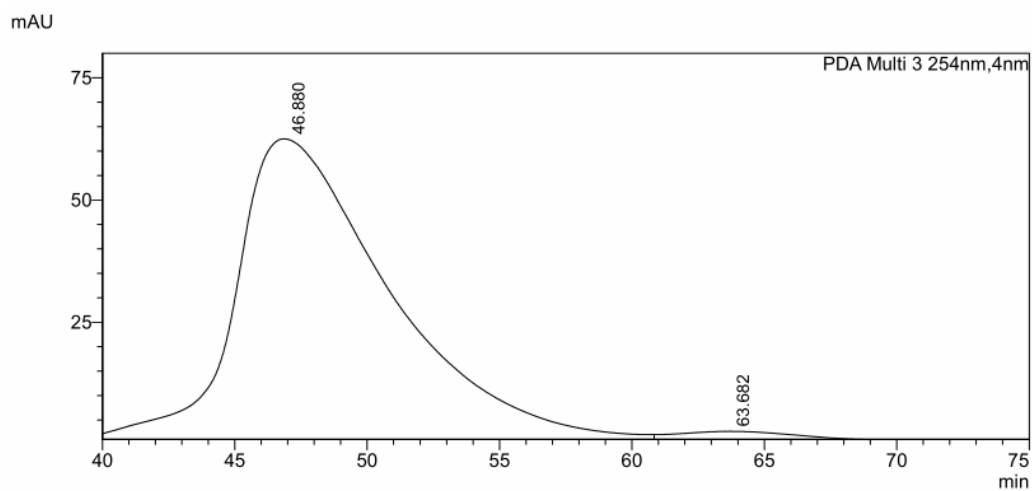

**<Peak Table>**

PDA Ch3 254nm

| Peak# | Ret. Time | Area%   |
|-------|-----------|---------|
| 1     | 46.880    | 95.715  |
| 2     | 63.682    | 4.285   |
| Total |           | 100.000 |

(-)-Methyl (S)-1-acetyl-2-((S)-4-(benzylamino)-1,1,1,2,2-pentafluoro-5-oxopentan-3-yl)-3-oxoindoline-2-carboxylate (2S,2'S)-22

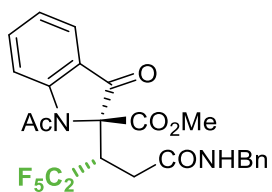



(2*S*,2'*S*)-**22**

The title compound was prepared according to **General Procedure 2**. A mixture of 4-nitrophenyl (*E*)-4,4,5,5,5-pentafluoropent-2-enoate **S3** (31.1 mg, 0.1 mmol), (2*S*,3*R*)-HyperBTM **1** (1.5 mg, 5  $\mu$ mol) and methyl 1-acetyl-3-oxoindoline-2-carboxylate **18** (23.3 mg, 0.1 mmol) in DMA (0.4 mL) was stirred for 16 h at room temperature. Benzylamine (11  $\mu$ L, 0.1 mmol) was added, and the reaction was permitted to stir for 1 h. The solution was diluted with EtOAc, washed sequentially with saturated aqueous Na<sub>2</sub>CO<sub>3</sub> ( $\times$ 3) and brine, dried over MgSO<sub>4</sub> and filtered. The solvent was removed under reduced pressure and the residue was purified by column chromatography (1:1 EtOAc:Hexane) to give the title compound (19.5 mg, 38%, 86:14 d.r.) as a mixture of diastereomers as a colourless oil.

*Data for 22*:  $[\alpha]_D^{20}$   $-23.10$  ( $c$  0.87 in CHCl<sub>3</sub>); **IR**  $\nu_{\max}$  (film) / cm<sup>-1</sup> 3333, 2957, 2851, 1761, 1672, 1472, 1373, 1206, 1179, 1115, 955, 912; **<sup>1</sup>H NMR** (500 MHz, CDCl<sub>3</sub>)  $\delta_{\text{H}}$ : 2.52 (0.86H, dd,  $J$  17.6, 7.6, CHCH<sub>A</sub>H<sub>B</sub>CONH), 2.54 (2.58H, s, NCOCH<sub>3</sub>), 2.61<sub>0</sub> (0.14H, dd,  $J$  18.1, 6.3, CHCH<sub>A</sub>H<sub>B</sub>CONH), 2.61<sub>3</sub> (0.42H, s, NCOCH<sub>3</sub>), 3.51 (0.14H, d (br),  $J$  18.3, CHCH<sub>A</sub>H<sub>B</sub>CONH), 3.61 (0.42H, s, COOCH<sub>3</sub>), 3.64 (2.58H, 2, COOCH<sub>3</sub>), 3.82 (0.86H, d (br),  $J$  17.6, CHCH<sub>A</sub>H<sub>B</sub>CONH), 4.44-4.58 (0.28H, 2 x dd obscured by major signal, NHCH<sub>2</sub>Ph), 4.50 (0.86H, dd,  $J$  14.8, 5.5, NHCH<sub>A</sub>H<sub>B</sub>Ph), 4.56 (0.86H, dd,  $J$  14.8, 5.8, NHCH<sub>A</sub>H<sub>B</sub>Ph), 4.80 (1.00H,  $J$  20.5, 14.9, 7.6, 1.6, CHCH<sub>2</sub>CONH, minor obscured), 5.80-5.85 (0.14H, m, NH), 6.12 (0.86H, s (br), NH), 7.22-7.30 (2.00H, m, PhC<sup>4</sup>H, ArC<sup>5</sup>H), 7.30-7.37 (4.00H, m, PhC<sup>2,3,5,6</sup>H), 7.56 (0.14H, d,  $J$  8.5, ArC<sup>7</sup>H), 7.60 (0.86H, s (br), ArC<sup>7</sup>H), 7.72<sub>5</sub> (0.14H, ddd,  $J$  8.6, 7.3, 1.5, ArC<sup>6</sup>H), 7.73<sub>3</sub> (0.86H, ddd,  $J$  8.6, 7.2, 1.2, ArC<sup>6</sup>H), 7.80 (0.86H, d,  $J$  7.7, ArC<sup>4</sup>H), 7.86 (0.14H, dd,  $J$  7.7, 1.4, ArC<sup>4</sup>H); **<sup>13</sup>C{<sup>1</sup>H} NMR** (126 MHz, CDCl<sub>3</sub>)  $\delta_{\text{C}}$ : 25.8 (NCOCH<sub>3</sub> (major)), 26.4 (NCOCH<sub>3</sub> (minor)), 30.5 (CHCH<sub>2</sub>CONH (major)), 34.0 (CHCH<sub>2</sub>CONH (minor)), 40.1 (app t,  $J$  18.4, CHCH<sub>2</sub>CONH (major)), 42.0 (app t,  $J$  17.5, CHCH<sub>2</sub>CONH (minor)), 44.0<sub>0</sub> (NHCH<sub>2</sub>Ph (major)), 44.0<sub>3</sub> (NHCH<sub>2</sub>Ph (minor)), 53.8 (COOCH<sub>3</sub> (major)), 53.9 (COOCH<sub>3</sub> (minor)), 72.2 (CCOOMe (major and minor)), 115.4 (ArC<sup>7</sup>H (major)), 116.4 (app tq,  $J$  260.0, 37.3, CF<sub>2</sub>CF<sub>3</sub> (major)), 118.7 (app qt,  $J$  287.6, 36.5 CF<sub>2</sub>CF<sub>3</sub> (major)), 122.8 (ArC<sup>7</sup>H (minor)), 124.0 (ArC<sup>5</sup>H (minor)), 124.5 (ArC<sup>5</sup>H (major)), 125.8 (ArC<sup>4</sup>H (major)), 126.4 (ArC<sup>4</sup>H (minor)), 127.5 (PhC<sup>4</sup>H, (major)), 127.6 (PhC<sup>4</sup>H (minor)), 127.9 (PhC<sup>2,6</sup>H (major)), 128.0 (PhC<sup>2,6</sup>H (minor)), 128.8 (PhC<sup>3,5</sup>H (major and minor)), 137.5 (ArC<sup>6</sup>H (minor)), 137.9 (ArC<sup>6</sup>H (major)), 138.5<sub>5</sub> (PhC<sup>1</sup> (major)), 138.5<sub>8</sub> (PhC<sup>1</sup> (minor)), 151.9 (ArC<sup>7a</sup>), 164.2 (COOMe (minor)), 166.2 (COOMe (major)), 168.8 (NCOMe (major)), 169.2 (CONHBn (major)), 169.6 (CONHBn (minor)), 170.1 (NCOMe (minor)), 190.4 (ArCOC (minor)), 192.3 (ArCOC (major)); **<sup>19</sup>F NMR** (471 MHz, CDCl<sub>3</sub>)  $\delta_{\text{F}}$ :  $-123.96$  (0.14F, d,  $J$  273.0, CF<sub>A</sub>F<sub>B</sub>CF<sub>3</sub>),  $-114.83$  (0.86F, d,  $J$  275.2, CF<sub>A</sub>F<sub>B</sub>CF<sub>3</sub>),  $-113.93$  (0.86F, d,  $J$  275.2, CF<sub>A</sub>F<sub>B</sub>CF<sub>3</sub>),  $-109.86$  (0.14F, d,  $J$  272.7, CF<sub>A</sub>F<sub>B</sub>CF<sub>3</sub>),  $-82.84$  (0.42F, s, CF<sub>3</sub>),  $-81.13$  (2.58F, s, CF<sub>3</sub> (major)); **HRMS** (ESI<sup>+</sup>) C<sub>24</sub>H<sub>21</sub>F<sub>5</sub>O<sub>5</sub>N<sub>2</sub>Na [M+Na]<sup>+</sup> found 535.1263, requires 535.1253 ( $-1.84$  ppm).

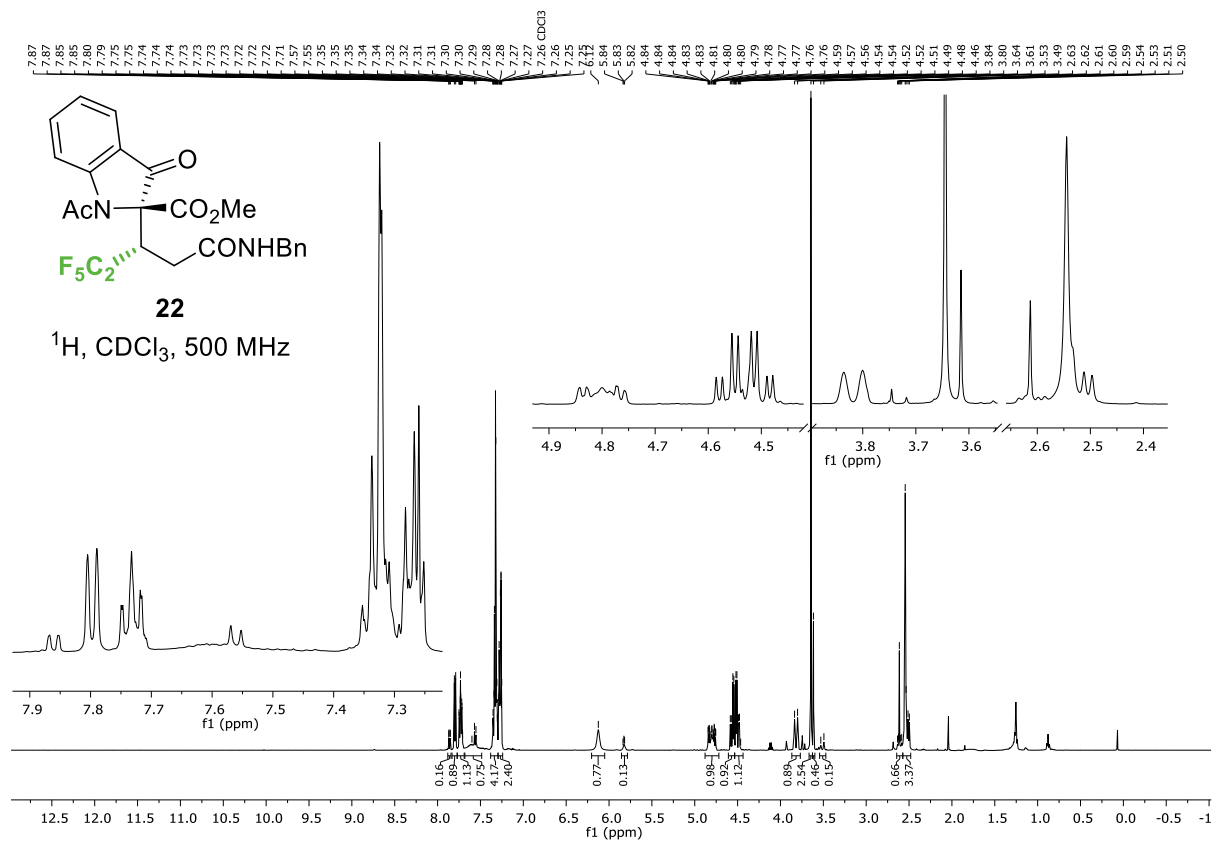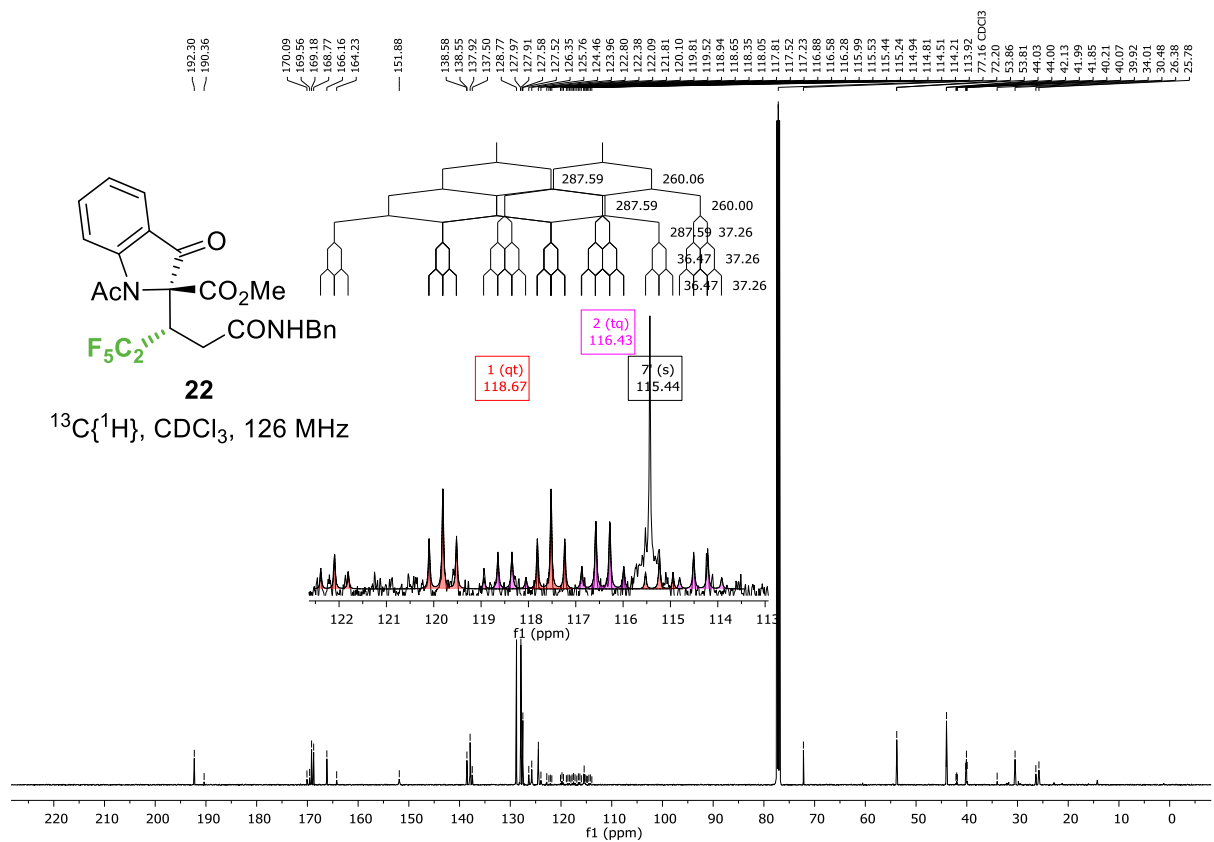

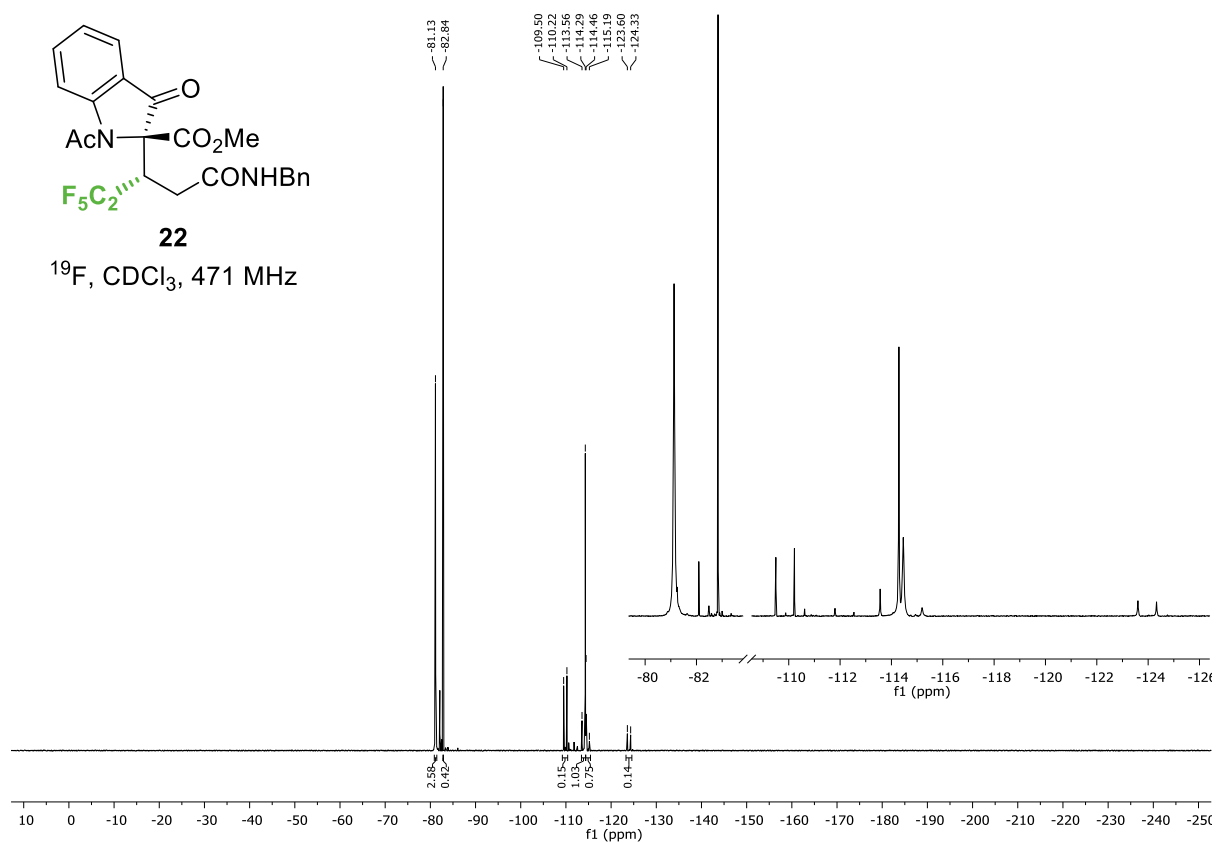

**HPLC Data for 22:** Chiralpak IB (95:5 hexane:PrOH, flow rate  $1.00 \text{ mL} \cdot \text{min}^{-1}$ , 211 nm,  $30 \text{ }^\circ\text{C}$ )  $t_{\text{R}}$  (*2S,2'S*)-**22**: 78.7 min,  $t_{\text{R}}$  (*2R,2'R*)-**22**: 112.3 min, 95:5 er;  $t_{\text{R}}$  *rel*-(*2R,2'S*)-**22**: 53.6 min,  $t_{\text{R}}$  *rel*-(*2S,2'R*)-**22**: 67.4 min, 76:24 er.

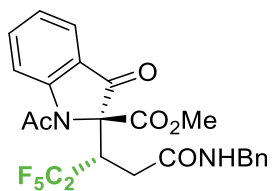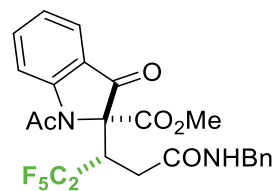

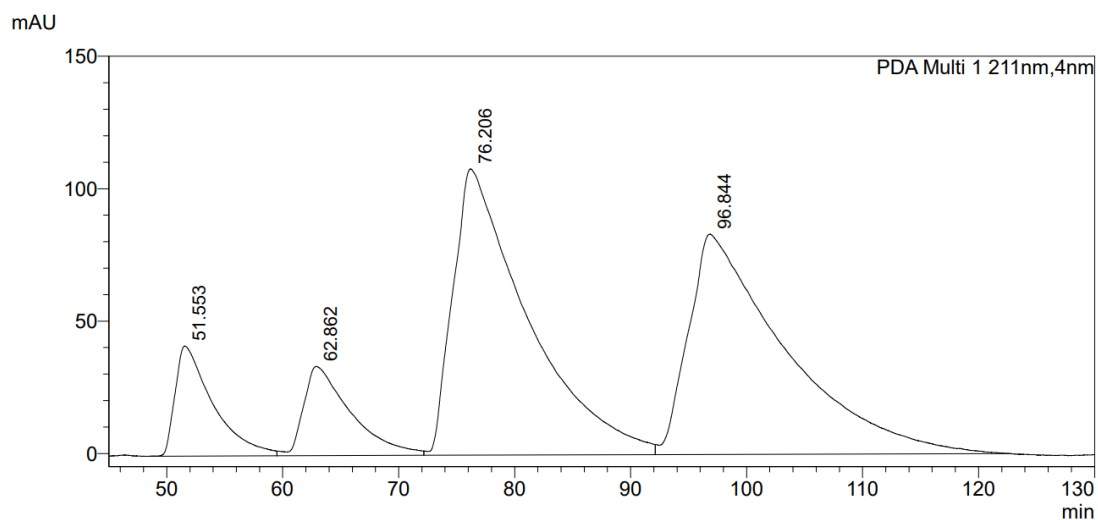

**<Peak Table>**

PDA Ch1 211nm

| Peak# | Ret. Time | Area%   |
|-------|-----------|---------|
| 1     | 51.553    | 8.154   |
| 2     | 62.862    | 8.263   |
| 3     | 76.206    | 41.918  |
| 4     | 96.844    | 41.664  |
| Total |           | 100.000 |

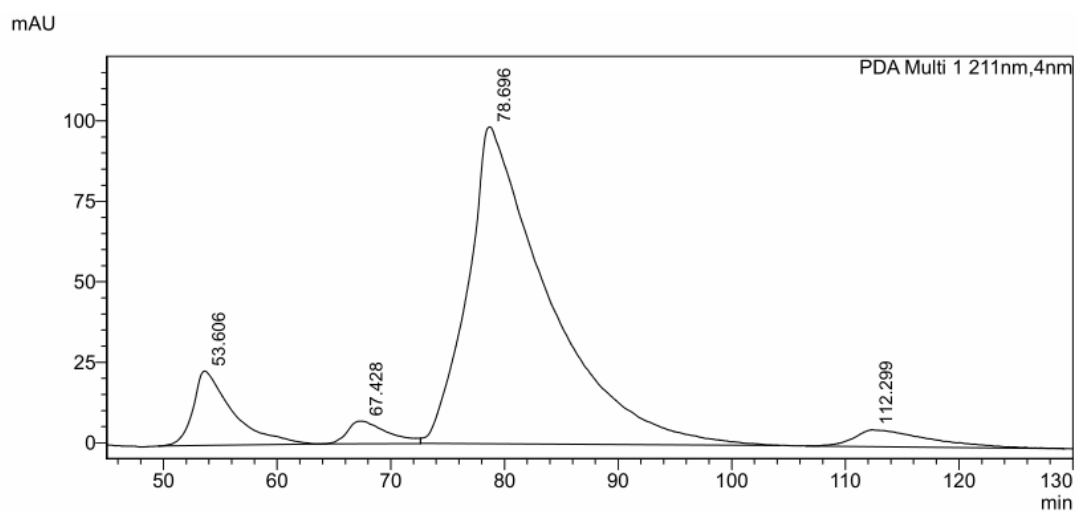

**<Peak Table>**

PDA Ch1 211nm

| Peak# | Ret. Time | Area%   |
|-------|-----------|---------|
| 1     | 53.606    | 9.543   |
| 2     | 67.428    | 2.957   |
| 3     | 78.696    | 83.395  |
| 4     | 112.299   | 4.105   |
| Total |           | 100.000 |

(-)-Methyl (S)-1-acetyl-2-((S)-4-(benzylamino)-1-ethoxy-1,4-dioxobutan-2-yl)-3-oxoindoline-2-carboxylate (2S,2'S)-23

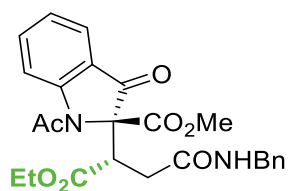

(2*S*,2'*S*)-**23**

#### Preparation from fumarate:

The title compound was prepared according to **General Procedure 2**. A mixture of ethyl (4-nitrophenyl) fumarate **26** (53.0 mg, 0.2 mmol), (2*S*,3*R*)-HyperBTM **1** (3.0 mg, 10  $\mu$ mol) and methyl 1-acetyl-3-oxoindoline-2-carboxylate **18** (46.6 mg, 0.2 mmol) in DMA (0.8 mL) was stirred for 16 h at room temperature. Benzylamine (22  $\mu$ L, 0.2 mmol) was then added, and the reaction was permitted to stir for 1 h. The solution was diluted with Et<sub>2</sub>O, washed sequentially with saturated aqueous Na<sub>2</sub>CO<sub>3</sub> (3 $\times$ ), brine, and dried over MgSO<sub>4</sub>. The solvent was removed under reduced pressure and the residue was purified by column chromatography (1:1 EtOAc:Hexane) to give the title compound (69.1 mg, 74%, 95:5 d.r.) as a mixture of diastereomers as a colourless oil.  $[\alpha]_D^{20}$  -55.5 (*c* 2.88 in CHCl<sub>3</sub>).

#### Preparation from maleate:

The title compound was prepared according to **General Procedure 2**. A mixture of ethyl (4-nitrophenyl) maleate **24** (53.0 mg, 0.2 mmol), (2*S*,3*R*)-HyperBTM **1** (3.0 mg, 10  $\mu$ mol) and methyl 1-acetyl-3-oxoindoline-2-carboxylate **18** (46.6 mg, 0.2 mmol) in DMA (0.8 mL) was stirred for 16 h at room temperature. Benzylamine (22  $\mu$ L, 0.2 mmol) was then added, and the reaction was permitted to stir for 1 h. The solution was diluted with Et<sub>2</sub>O, washed sequentially with saturated aqueous Na<sub>2</sub>CO<sub>3</sub> (3 $\times$ ), brine, and dried over MgSO<sub>4</sub>. The solvent was removed under reduced pressure and the residue was purified by column chromatography (1:1 EtOAc:Hexane) to give the title compound (58.2 mg, 62%, 89:11 d.r.) as a mixture of diastereomers as a colourless oil.

*Data for (2*R*,2'*S*)-23:*  $[\alpha]_D^{20}$  -51.4 (*c* 1.2 in CHCl<sub>3</sub>); **IR**  $\nu_{\max}$  (film) / cm<sup>-1</sup> 3379, 2955, 2245, 1757, 1721, 1668, 1608, 1470, 1371, 1335, 1238, 1204, 1020, 910, 856; **Chiral HPLC analysis:** Chiralpak AD-H (80:20 hexane:IPA, flow rate 1.00 mL·min<sup>-1</sup>, 254 nm, 30 °C) *t*<sub>R</sub> (2*R*,2'*S*)-**23**: 22.5 min, *t*<sub>R</sub> 33.3 min, 71:29 er, (2*S*,2'*S*)-**23** *t*<sub>R</sub> (major): 29.2 min, *t*<sub>R</sub> (minor): 17.8 min, 70:30 er; **<sup>1</sup>H NMR** (500 MHz, CDCl<sub>3</sub>)  $\delta$ <sub>H</sub>: 0.79 (0.33H, t, *J* 7.1, OCH<sub>2</sub>CH<sub>3</sub>), 0.94 (2.67, t, *J* 7.1, OCH<sub>2</sub>CH<sub>3</sub>), 2.48 (2.67H, s, NCOCH<sub>3</sub>), 2.52 (0.33H, s, NCOCH<sub>3</sub>), 2.92 (0.89H, dd, *J* 15.6, 11.6, CHCH<sub>A</sub>H<sub>B</sub>CONH), 2.99 (0.11H, dd, *J* 16.3, 10.2, CH<sub>A</sub>H<sub>B</sub>CONH), 3.22 (0.11H, dd, *J* 16.3, 1.8, CHCH<sub>A</sub>H<sub>B</sub>CONH), 3.42 (0.89H, dd, *J* 15.6, 2.8, CHCH<sub>A</sub>H<sub>B</sub>CONH), 3.57 (0.11H, dq, *J* 10.8, OCH<sub>A</sub>H<sub>B</sub>CH<sub>3</sub>), 3.67 (0.33H, s, COOCH<sub>3</sub>), 3.68 (2.67H, s, COOCH<sub>3</sub>), 3.79 (0.89H, dq, *J* 10.8, 7.1, OCH<sub>A</sub>H<sub>B</sub>CH<sub>3</sub>), 3.86 (0.89H, dq, *J* 10.9, 7.1, OCH<sub>A</sub>H<sub>B</sub>CH<sub>3</sub>),

4.16 (0.11H, dd,  $J$  10.2, 3.1, CHCH<sub>2</sub>CONH), 4.31 (0.89H, dd,  $J$  11.5, 2.8, CHCH<sub>2</sub>CONH), 4.38 (0.89H, dd,  $J$  14.9, 5.5, NHCH<sub>A</sub>H<sub>B</sub>Ph), 4.45 (0.89H, dd,  $J$  14.8, 6.0, NHCH<sub>A</sub>H<sub>B</sub>Ph), 5.81 (0.11H, app t,  $J$  5.2, NH), 5.93 (0.89H, app t,  $J$  5.8, NH), 7.19-7.28 (4H, m, PhC<sup>2,4,6</sup>H, ArC<sup>5</sup>H), 7.28-7.34 (2H, m, PhC<sup>3,5</sup>H), 7.50 (0.11H, ), 7.67 (1.00H, app t,  $J$  7.6, ArC<sup>6</sup>H, minor obscured), 7.77 (0.89H, d,  $J$  7.6, ArC<sup>4</sup>H), 7.82 (0.11H, d,  $J$  7.6, ArC<sup>4</sup>H), ArC<sup>7</sup>H shows coalescence signal between 7.56-8.00; <sup>13</sup>C{<sup>1</sup>H} NMR (126 MHz, CDCl<sub>3</sub>) δ<sub>c</sub>: 13.5 (OCH<sub>2</sub>CH<sub>3</sub> (minor)), 14.0 (OCH<sub>2</sub>CH<sub>3</sub> (major)), 25.5 (NCOCH<sub>3</sub> (major)), 25.8 (NCOCH<sub>3</sub> (minor)), 33.6 (CHCH<sub>2</sub>CONH (major)), 35.2 (CHCH<sub>2</sub>CONH (minor)), 43.6<sub>8</sub> (NHCH<sub>2</sub>Ph (minor)), 43.7<sub>2</sub> (NHCH<sub>2</sub>Ph (major)), 46.1 (CHCH<sub>2</sub>CONH (major)), 47.7 (CHCH<sub>2</sub>CONH (minor)), 53.4 (COOCH<sub>3</sub> (minor)), 53.6 (COOCH<sub>3</sub> (major)), 61.3 (OCH<sub>2</sub>CH<sub>3</sub> (minor)), 61.4 (OCH<sub>2</sub>CH<sub>3</sub> (major)), 73.1 (ArCOC (major)), 75.7 (ArCOC (minor)) 115.9 (ArC<sup>7</sup>H (minor)), 124.4 (ArC<sup>3a</sup> (major)), 124.6 (ArC<sup>5</sup>H (major)), 125.4 (ArC<sup>4</sup>H (major)), 125.7 (ArC<sup>4</sup>H (minor)), 127.5 (PhC<sup>4</sup>H (minor)), 127.6 (PhC<sup>4</sup>H, (major)) 127.8 (PhC<sup>2,6</sup>H (minor)), 127.9 (PhC<sup>2,6</sup>H (major)), 128.7 (PhC<sup>3,5</sup>H (minor)), 128.8 (PhC<sup>3,5</sup>H (major)), 137.2 (ArC<sup>6</sup>H (minor)), 137.6 (ArC<sup>6</sup>H (major)), 138.2 (PhC<sup>1</sup> (major)), 138.4 (PhC<sup>1</sup> (minor)), 152.2 (ArC<sup>7a</sup> (major)), 166.2 (COOMe (minor)), 166.3 (COOMe (major)), 168.2 (NCOMe (major)), 169.3 (NCOMe (minor)), 170.6 (CONHBn (major)), 170.7 (COOEt (major)), 191.9 (ArCOC (minor)), 192.0 (ArCOC (major)); HRMS (ESI<sup>+</sup>) C<sub>25</sub>H<sub>27</sub>O<sub>7</sub>N<sub>2</sub> [M+H]<sup>+</sup> found 467.1809, requires 467.1813 (-0.73 ppm).

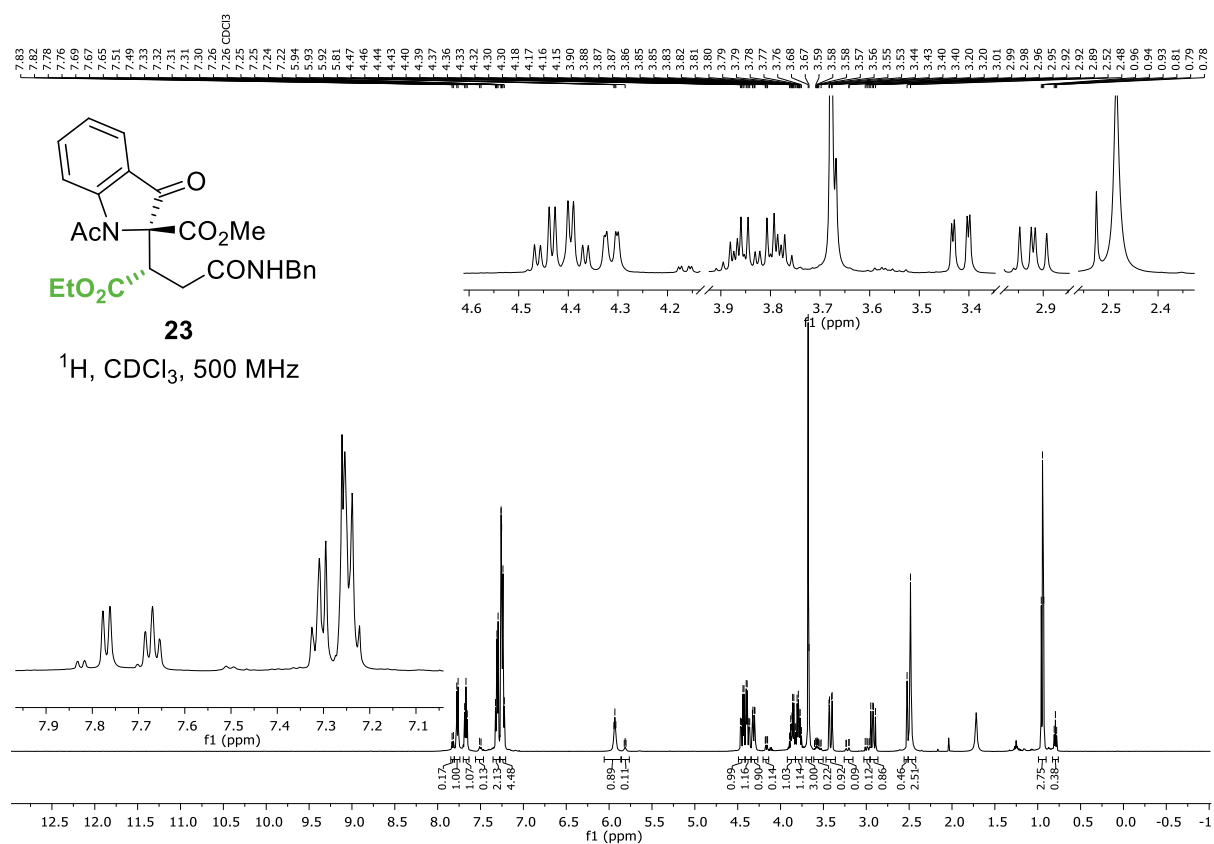

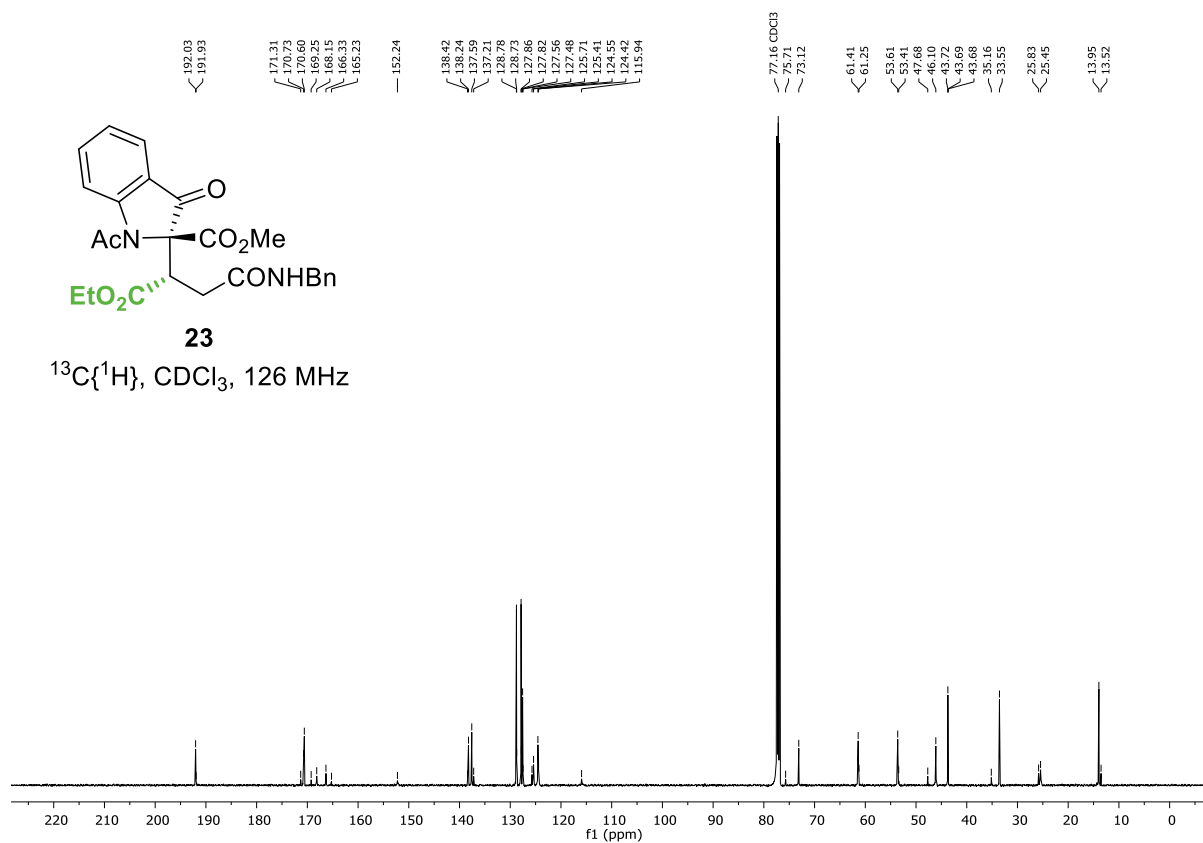

**HPLC Data for (2*S*,2'*S*)-23 from fumarate:** Chiralpak AD-H (80:20 hexane:IPA, flow rate 1.00 mL·min<sup>-1</sup>, 254 nm, 30 °C)  $t_R$  (2*S*,2'*S*)-**23**: 32.7 min,  $t_R$  (2*R*,2'*R*)-**23**: 22.9 min, 92:8 er,  $t_R$  (*rel*-2*R*,2'*S*)-**23**: 28.8 min,  $t_R$  (*rel*-2*S*,2*R*)-**23**: 17.7 min, 72:28 er.

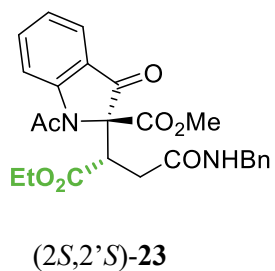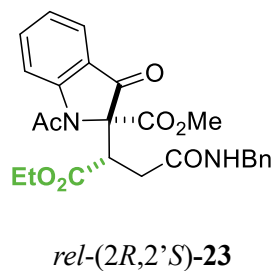

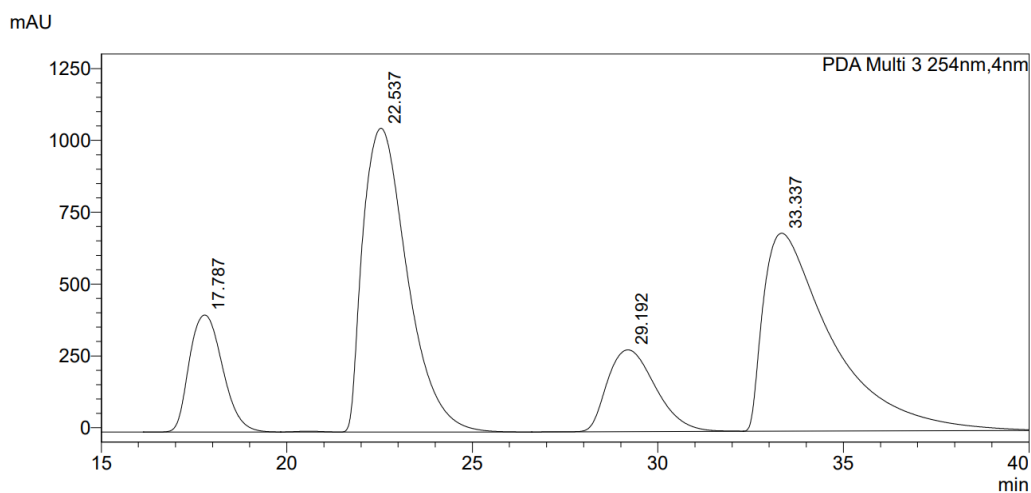

**<Peak Table>**

| PDA Ch3 254nm |           |         |
|---------------|-----------|---------|
| Peak#         | Ret. Time | Area%   |
| 1             | 17.787    | 11.099  |
| 2             | 22.537    | 38.581  |
| 3             | 29.192    | 11.267  |
| 4             | 33.337    | 39.054  |
| Total         |           | 100.000 |

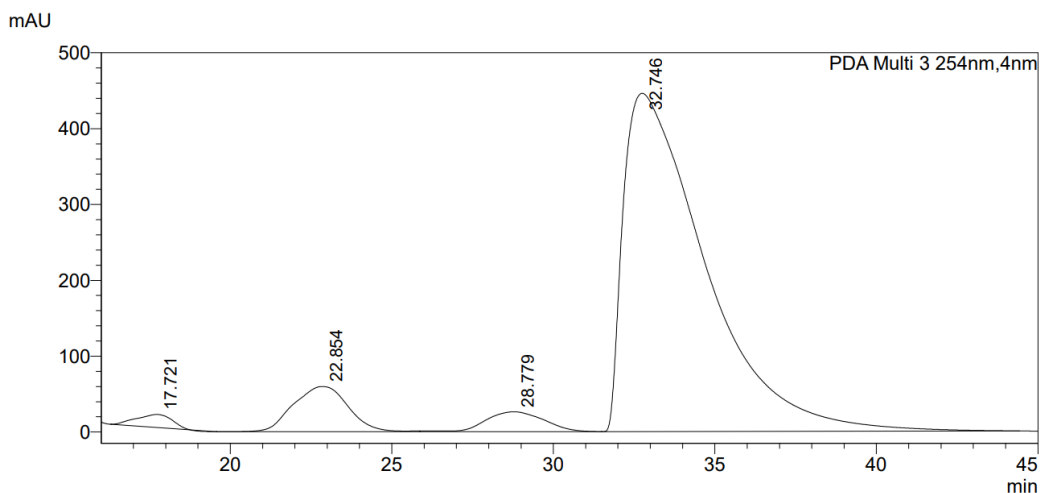

**<Peak Table>**

| PDA Ch3 254nm |           |         |
|---------------|-----------|---------|
| Peak#         | Ret. Time | Area%   |
| 1             | 17.721    | 1.429   |
| 2             | 22.854    | 7.770   |
| 3             | 28.779    | 3.616   |
| 4             | 32.746    | 87.186  |
| Total         |           | 100.000 |

**HPLC Data for (2*R*,2'*R*)-23 from maleate:** Chiralpak AD-H (80:20 hexane:IPA, flow rate 1.00 mL·min<sup>-1</sup>, 254 nm, 30 °C) *t<sub>R</sub>* (2*R*,2'*R*)-23: 22.5 min, *t<sub>R</sub>* (2*S*,2'*S*): 33.3 min, 71:29 er, (2*R*,2'*S*)-23: *t<sub>R</sub>* (major): 29.2 min, *t<sub>R</sub>* (minor): 17.8 min, 66:34 er.



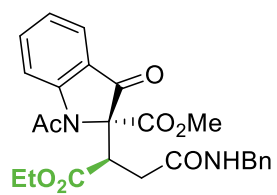

(2*S*,2'*S*)-23

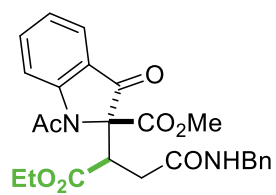

*rel*-(2*R*,2'*S*)-23

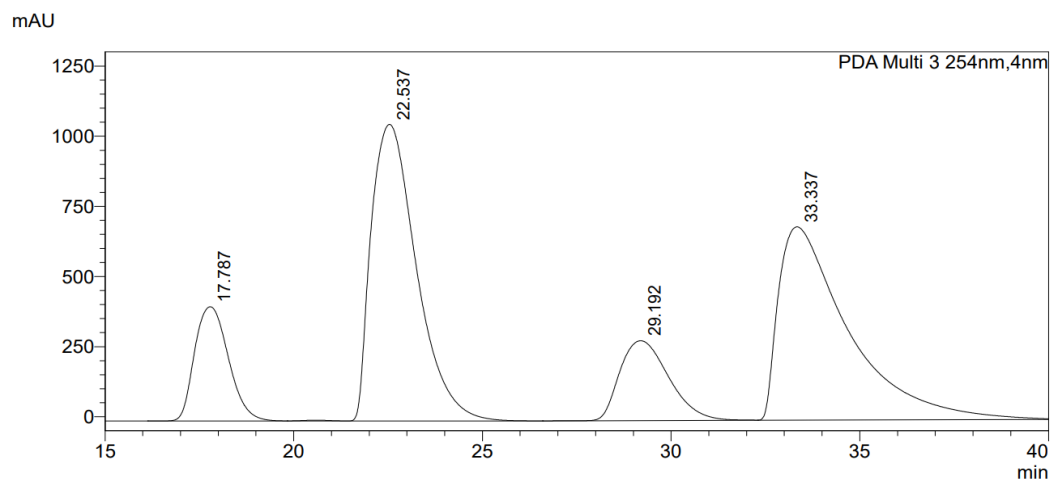

<Peak Table>

PDA Ch3 254nm

| Peak# | Ret. Time | Area%   |
|-------|-----------|---------|
| 1     | 17.787    | 11.099  |
| 2     | 22.537    | 38.581  |
| 3     | 29.192    | 11.267  |
| 4     | 33.337    | 39.054  |
| Total |           | 100.000 |

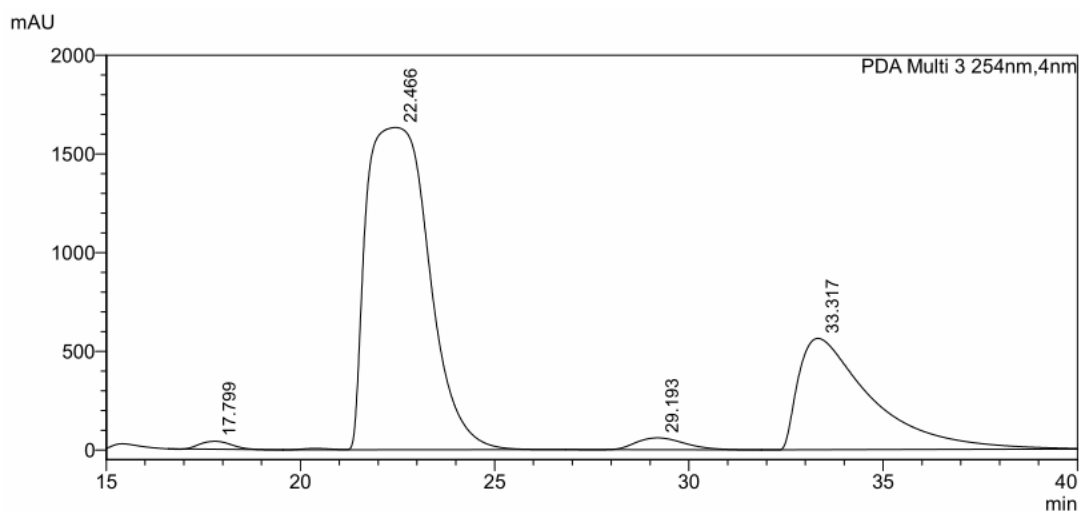

<Peak Table>

| PDA Ch3 254nm |           |         |
|---------------|-----------|---------|
| Peak#         | Ret. Time | Area%   |
| 1             | 17.799    | 0.858   |
| 2             | 22.466    | 69.210  |
| 3             | 29.193    | 1.985   |
| 4             | 33.317    | 27.947  |
| Total         |           | 100.000 |

(+)-Ethyl (S)-1-((S)-4'-(benzylamino)-1',1'-difluoro-4'-oxobutan-2'-yl)-2-oxocyclopentane-carboxylate (1*S*,2'*S*)-**S7** and *rel*-(1*S*,2'*R*)-**S7**

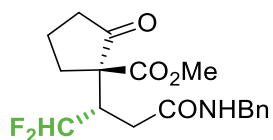

(1*S*,2'*S*)-**S7**

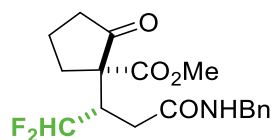

*rel*-(1*S*,2'*R*)-**S7**

The title compound was prepared according to **General Procedure 2**. A mixture of 4-nitrophenyl (*E*)-4,4-difluorobut-2-enoate **S4** (48.6 mg, 0.2 mmol), (2*S*,3*R*)-HyperBTM **1** (3.1 mg, 0.01 mmol) and methyl 2-oxocyclopentane-1-carboxylate **7** (31  $\mu$ L, 0.2 mmol) in DMA (0.7 mL) was stirred for 16 h at room temperature. The solution was diluted with Et<sub>2</sub>O, washed sequentially with saturated aqueous Na<sub>2</sub>CO<sub>3</sub> (3 $\times$ ), brine, and dried over MgSO<sub>4</sub>. The solvent was removed under reduced pressure and the residue was purified by column chromatography (1:3 EtOAc:Hexane) to give the title compound in two fractions (major diastereomer: 45.9 mg, 59% as a white solid, and minor diastereomer: 27.5 mg, 36% as a colourless oil); combined (73.4 mg, 95%, 62:38 d.r.).

*Data for major diastereoisomer (1S,2'S)-S7*: mp 69-73  $^{\circ}$ C;  $[\alpha]_D^{20}$  +17.6 (*c* 0.75 in CHCl<sub>3</sub>); IR  $\nu_{\max}$  (film) 3258, 3082, 2961, 2359, 1717, 1643, 1553, 1211, 1115, 980, 856; <sup>1</sup>H NMR (500 MHz, CDCl<sub>3</sub>)  $\delta_{\text{H}}$ : 1.25 (3H, t, *J* 7.1, OCH<sub>2</sub>CH<sub>3</sub>), 1.85-1.96 (1H, m, COCH<sub>2</sub>CH<sub>A</sub>H<sub>B</sub>), 1.96-2.06 (2H, m, CCH<sub>A</sub>H<sub>B</sub>, COCH<sub>2</sub>CH<sub>A</sub>H<sub>B</sub>), 2.22 (1H, ddd, *J* 19.0, 10.5, 8.5, COCH<sub>A</sub>H<sub>B</sub>CH<sub>2</sub>), 2.27 (1H, dd, *J* 15.5, 4.2,

CHCH<sub>A</sub>H<sub>B</sub>CONH), 2.46 (1H, app ddt, *J* 19.3, 9.3, 2.1, COCH<sub>A</sub>H<sub>B</sub>CH<sub>2</sub>), 2.52 (2H, dd, *J* 15.5, 8.0, CHCH<sub>A</sub>H<sub>B</sub>CONH, COCH<sub>A</sub>H<sub>B</sub>CH<sub>2</sub> (obscured by previous)), 3.30 (1H, dddd, *J* 20.7, 13.4, 8.0, 4.2, 2.1, CHCH<sub>2</sub>CONH), 4.17 (2H, q, *J* 7.1, OCH<sub>2</sub>CH<sub>3</sub>), 4.41 (1H, dd, *J* 14.7, 5.3, NHCH<sub>A</sub>H<sub>B</sub>Ph), 4.45 (1H, dd, *J* 14.7, 5.7, NHCH<sub>A</sub>H<sub>B</sub>Ph), 5.90 (1H, app t, *J* 5.7, NH), 6.37 (1H, ddd, *J* 57.0, 55.5, 2.1, CHF<sub>2</sub>), 7.24-7.30 (3H, m, PhC<sup>2,4,6</sup>H), 7.30-7.36 (2H, m, PhC<sup>3,5</sup>H); <sup>13</sup>C{<sup>1</sup>H} NMR (126 MHz, CDCl<sub>3</sub>) δ<sub>C</sub>: 14.0 (OCH<sub>2</sub>CH<sub>3</sub>), 19.4 (COCH<sub>2</sub>CH<sub>2</sub>), 31.6 (CCH<sub>2</sub>CH<sub>2</sub>), 31.7 (t, *J* 4.5, CHCH<sub>2</sub>CONH), 37.6 (COCH<sub>2</sub>CH<sub>2</sub>), 42.8 (t, *J* 19.7, CHCH<sub>2</sub>CONH), 44.0 (NHCH<sub>2</sub>Ph), 61.0 (d, *J* 5.0, CCH<sub>2</sub>CH<sub>2</sub>), 62.3 (OCH<sub>2</sub>CH<sub>3</sub>), 116.6 (app t, *J* 243.0, CHF<sub>2</sub>), 127.7 (PhC<sup>4</sup>H), 128.0 (PhC<sup>2,6</sup>H), 128.9 (PhC<sup>3,5</sup>H), 138.1 (PhC<sup>1</sup>), 169.5 (COOEt), 170.3 (CONHBn), 213.4 (COCH<sub>2</sub>CH<sub>2</sub>); <sup>19</sup>F NMR (471 MHz, CDCl<sub>3</sub>) δ<sub>F</sub>: -123.51 (1F, ddd, *J* 286.2, 56.5, 20.7, CHF<sub>A</sub>F<sub>B</sub>), -119.79 (1F, ddd, *J* 286.2, 55.4, 13.4, CHF<sub>A</sub>F<sub>B</sub>); HRMS (ESI<sup>+</sup>) C<sub>19</sub>H<sub>24</sub>F<sub>2</sub>O<sub>4</sub>N [M]<sup>+</sup> found 368.1660, requires 368.1668 (-2.2 ppm).

*Data for minor diastereoisomer rel-(1R,2'S)-S7: [α]<sub>D</sub><sup>20</sup>-3.76 (c 0.85 in CHCl<sub>3</sub>); IR ν<sub>max</sub> (film) 3298, 3088, 2980, 1753, 1659, 1557, 1225, 1061, 1026; <sup>1</sup>H NMR (500 MHz, CDCl<sub>3</sub>) δ<sub>H</sub>: 1.24 (3H, t, *J* 7.1, OCH<sub>2</sub>CH<sub>3</sub>), 1.96 (1H, dddd, *J* 17.8, 13.0, 8.8, 7.3, COCH<sub>2</sub>CH<sub>A</sub>H<sub>B</sub>), 2.06 (1H, dddd, *J* 17.8, 9.0, 7.2, 4.7, COCH<sub>2</sub>CH<sub>A</sub>H<sub>B</sub>), 2.19 (1H, ddd, *J* 13.6, 9.0, 7.1, CCH<sub>A</sub>H<sub>B</sub>CH<sub>2</sub>), 2.29-2.45 (2H, m, COCH<sub>2</sub>CH<sub>2</sub>), 2.42 (1H, dd, *J* 15.8, 6.8, CHCH<sub>A</sub>H<sub>B</sub>), 2.56 (1H, d, *J* 12.4, 7.0, 4.6, CCH<sub>A</sub>H<sub>B</sub>CH<sub>2</sub>), 2.64 (1H, dd, *J* 15.9, 4.9, CHCH<sub>A</sub>H<sub>B</sub>CONH), 3.26 (1H, dddd, *J* 16.3, 12.8, 6.8, 5.0, 4.9, CHCH<sub>2</sub>CONH), 4.15 (2H, q, *J* 7.1, OCH<sub>2</sub>CH<sub>3</sub>), 4.40 (1H, dd, *J* 14.8, 5.7, NHCH<sub>A</sub>H<sub>B</sub>Ph), 4.43 (1H, dd, *J* 14.8, 5.8, NHCH<sub>A</sub>H<sub>B</sub>Ph), 5.90 (1H, app t, *J* 5.9, NH), 6.09 (1H, app td, *J* 56.4, 4.7, CHF<sub>2</sub>), 7.24-7.30 (3H, m, PhC<sup>2,4,6</sup>H), 7.30-7.35 (2H, m, PhC<sup>3,5</sup>H); <sup>13</sup>C{<sup>1</sup>H} NMR (126 MHz, CDCl<sub>3</sub>) δ<sub>C</sub>: 14.1 (OCH<sub>2</sub>CH<sub>3</sub>), 19.6 (COCH<sub>2</sub>CH<sub>2</sub>), 31.8 (d, *J* 2.6, CCH<sub>2</sub>CH<sub>2</sub>), 32.4 (t, *J* 4.7, CHCH<sub>2</sub>CONH), 38.0 (COCH<sub>2</sub>CH<sub>2</sub>), 42.7 (t, *J* 19.8, CHCH<sub>2</sub>), 43.9 (NHCH<sub>2</sub>Ph), 60.7 (t, *J* 2.8, CCH<sub>2</sub>CH<sub>2</sub>), 62.3 (OCH<sub>2</sub>CH<sub>3</sub>), 117.1 (t, *J* 243.8, CHF<sub>2</sub>), 127.7 (PhC<sup>4</sup>H), 127.9 (PhC<sup>2,6</sup>H), 128.8 (PhC<sup>3,5</sup>H), 138.1 (PhC<sup>7</sup>), 169.9 (COOEt), 170.3 (CONHBn), 213.1 (COCH<sub>2</sub>CH<sub>2</sub>); <sup>19</sup>F NMR (471 MHz, CDCl<sub>3</sub>) δ<sub>F</sub>: -117.87 (1F, ddd, *J* 285.1, 56.0, 12.7, CHF<sub>A</sub>F<sub>B</sub>), -119.30 (1F, ddd, *J* 285.1, 56.7, 16.4, CHF<sub>A</sub>F<sub>B</sub>); HRMS (ESI<sup>+</sup>) C<sub>19</sub>H<sub>24</sub>F<sub>2</sub>O<sub>4</sub>N [M+H]<sup>+</sup> found 368.1660, requires 368.1668 (-2.0 ppm).*

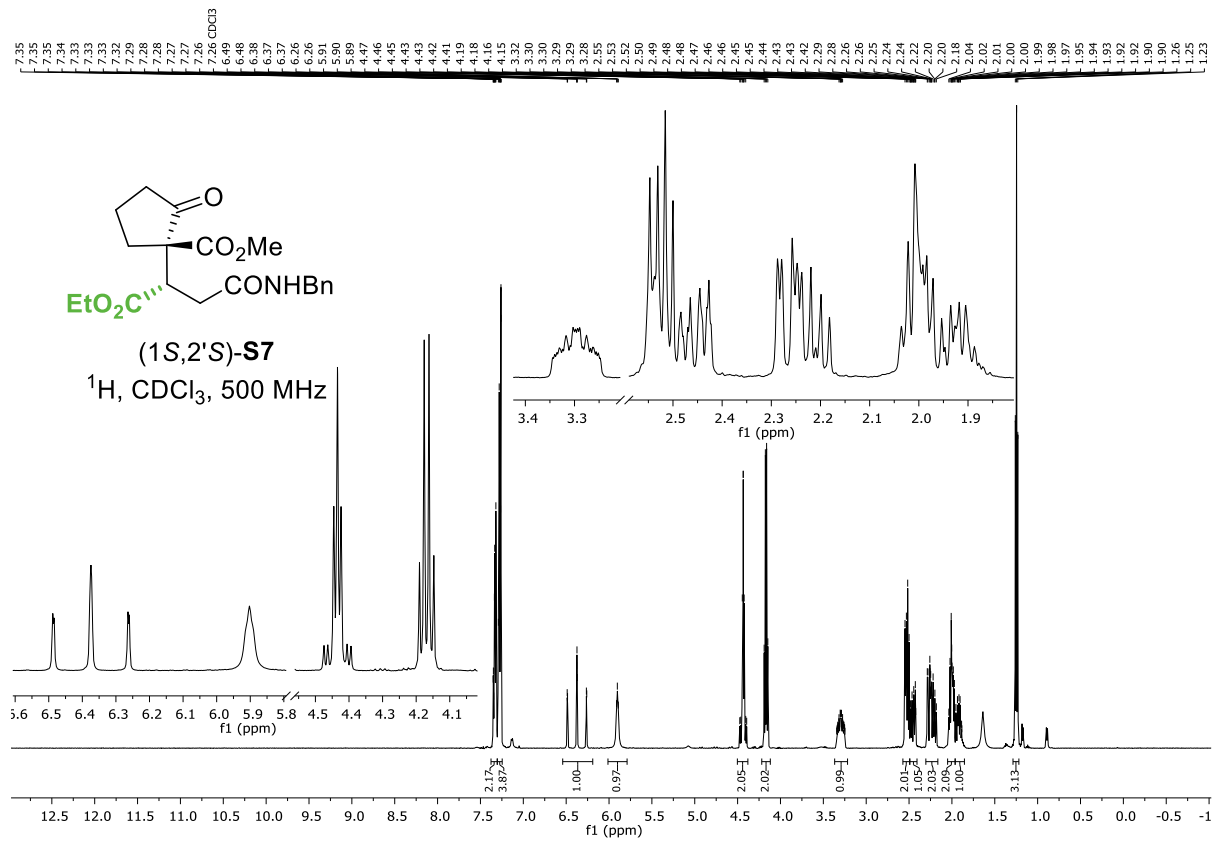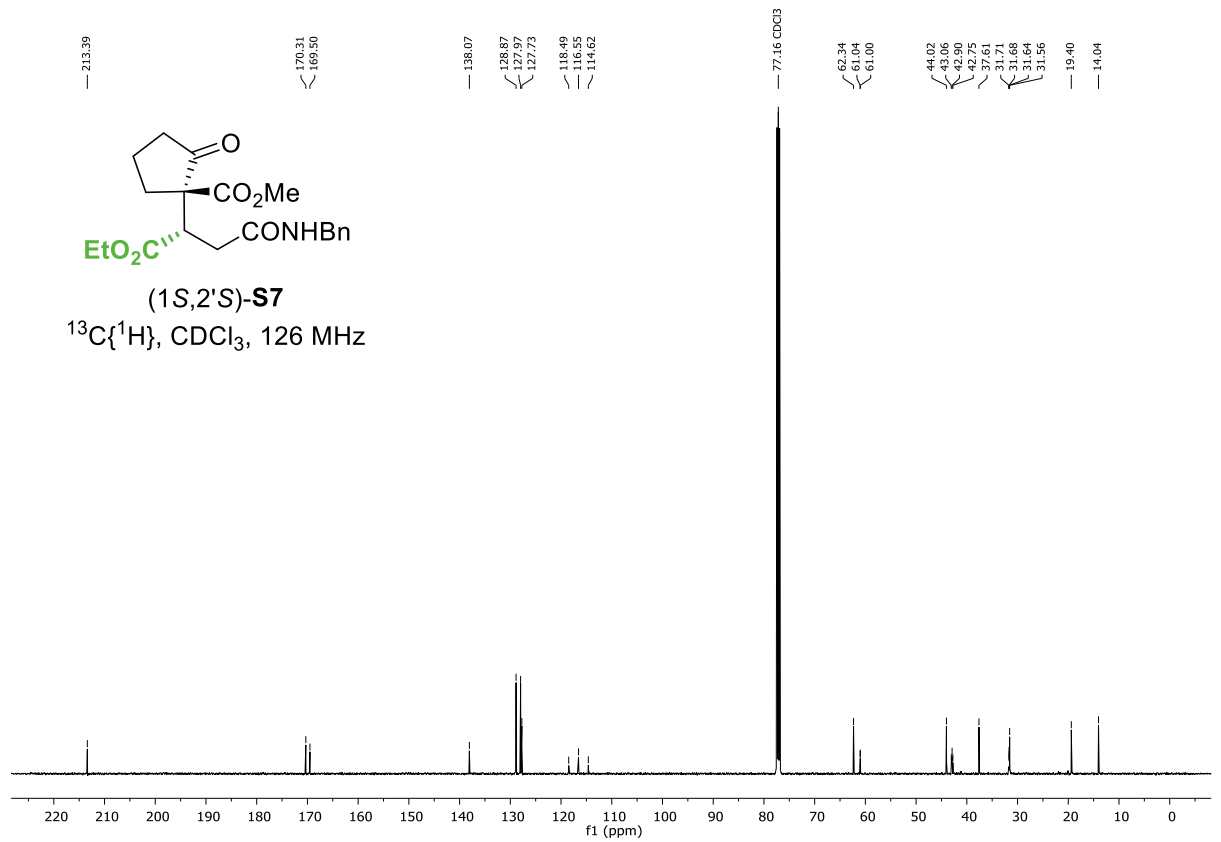

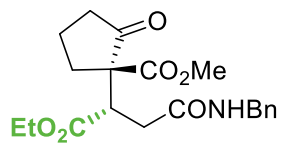

(1*S*,2'*S*)-**S7**  
<sup>19</sup>F, CDCl<sub>3</sub>, 471 MHz

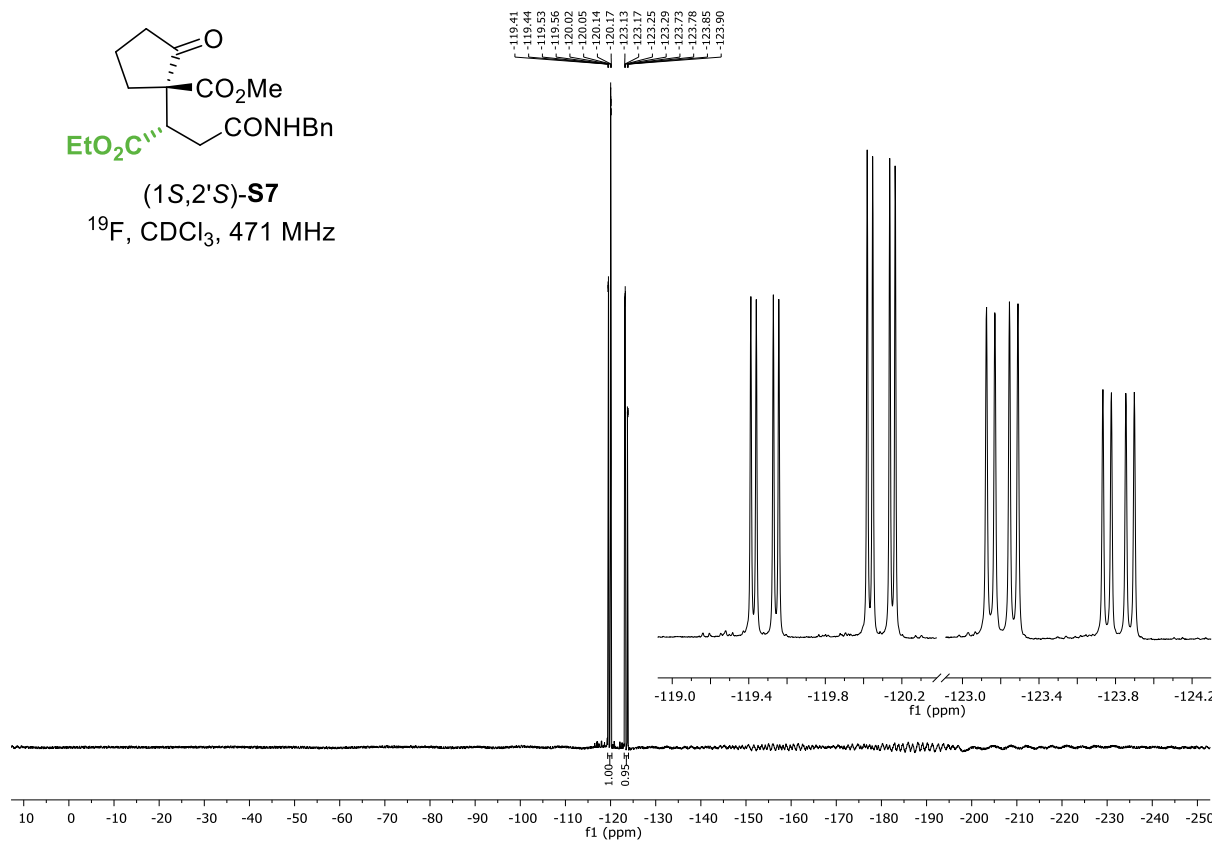

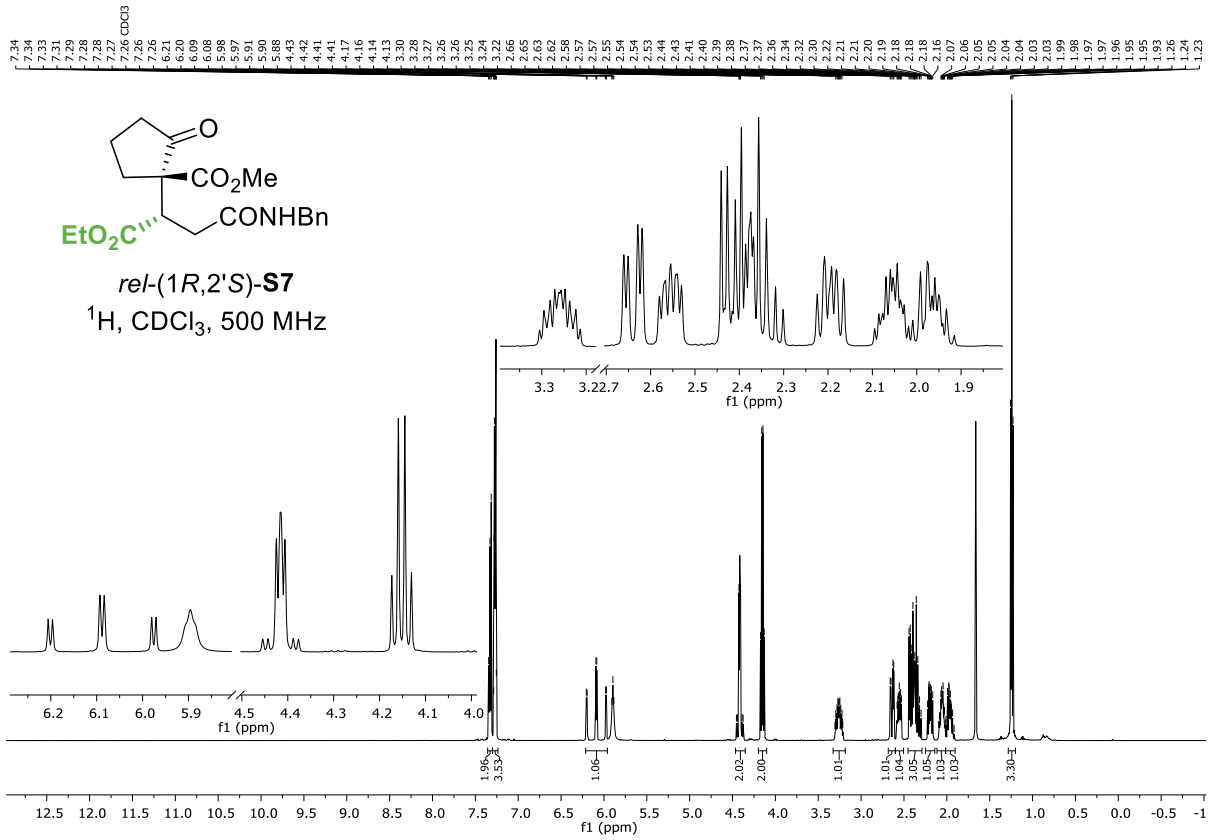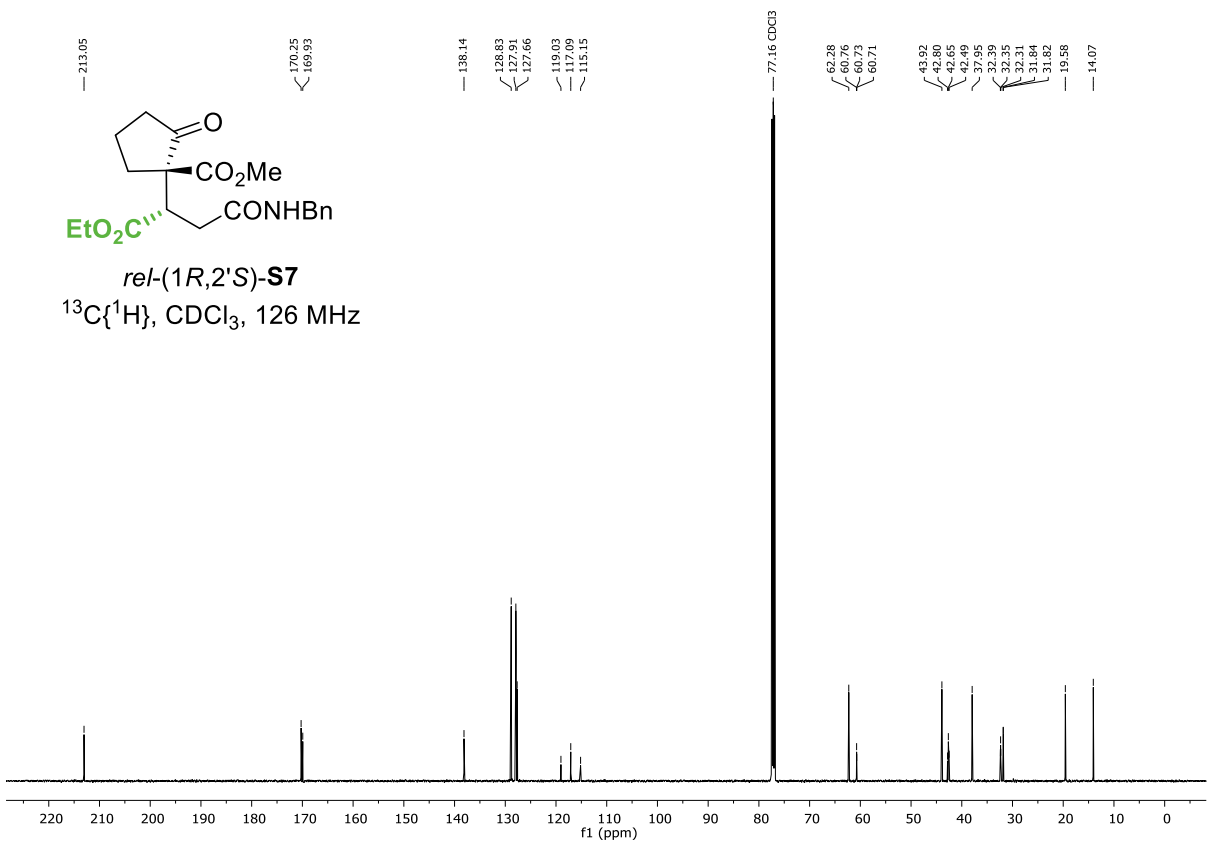

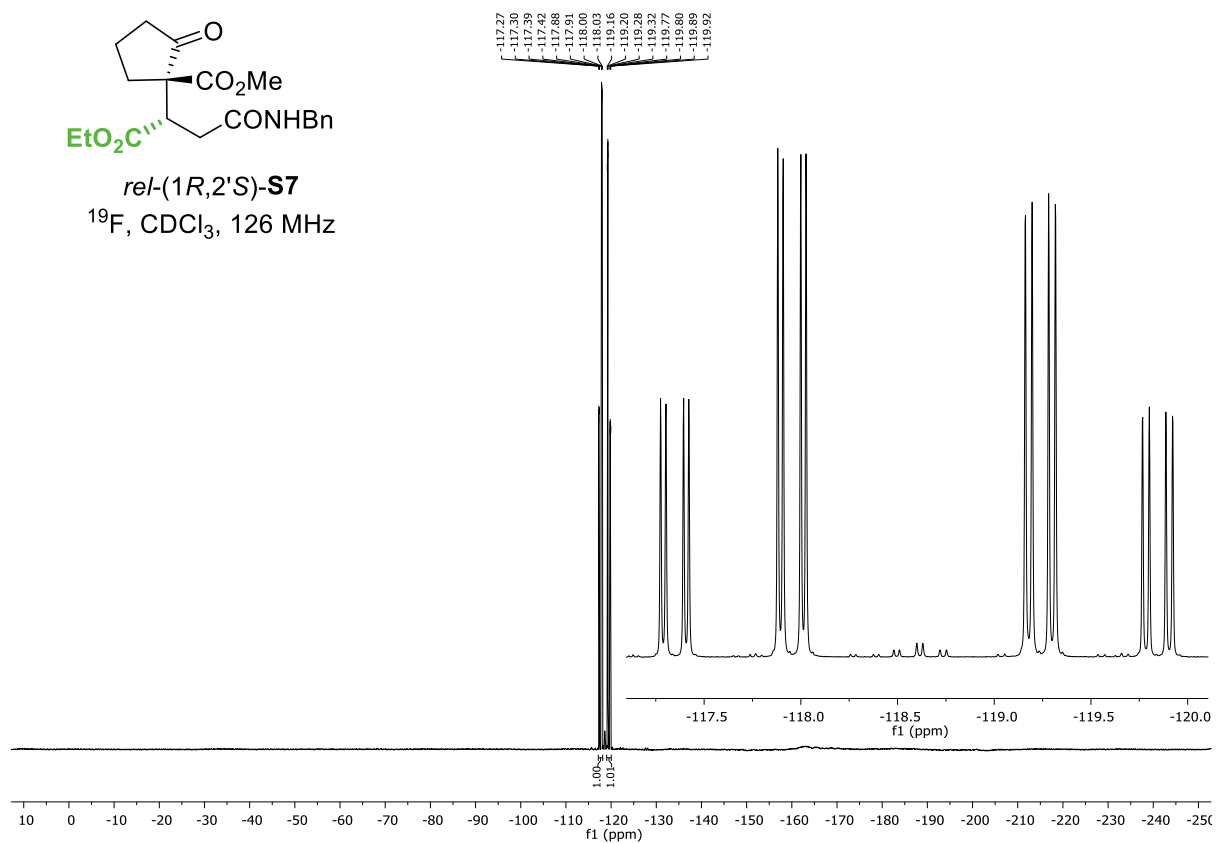

**HPLC Data for (1*S*,2'*S*)-S7:** Chiralpak AD-H (90:10 hexane:IPA, flow rate 1.00 mL·min<sup>-1</sup>, 254 nm, 30 °C) *t<sub>R</sub>* (1*S*,2'*S*)-S7: 16.8 min, *t<sub>R</sub>* (1*R*,2'*R*)-S7: 18.6 min, 36:64 er.

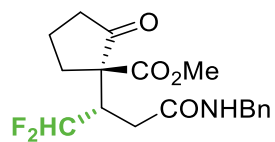

(1*S*,2'*S*)-**S7**

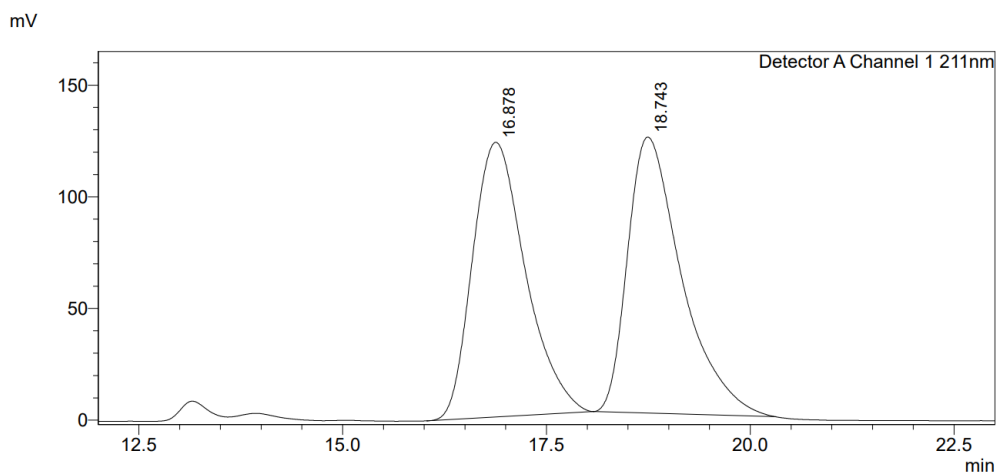

**<Peak Table>**

Detector A Channel 1 211nm

| Peak# | Ret. Time | Area%   |
|-------|-----------|---------|
| 1     | 16.878    | 49.437  |
| 2     | 18.743    | 50.563  |
| Total |           | 100.000 |

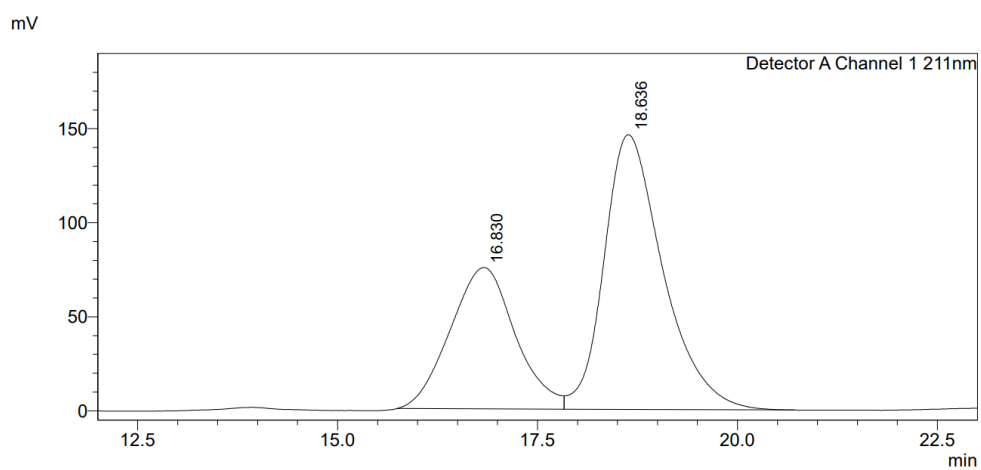

**<Peak Table>**

Detector A Channel 1 211nm

| Peak# | Ret. Time | Area%   |
|-------|-----------|---------|
| 1     | 16.830    | 36.199  |
| 2     | 18.636    | 63.801  |
| Total |           | 100.000 |



HPLC Data for *rel*-(2*R*,2'*S*)-S7: Chiralpak AD-H (90:10 hexane:IPA, flow rate 1.00 mL·min<sup>-1</sup>, 254 nm, 30 °C) *t*<sub>R</sub> *rel*-(1*R*,2'*S*)-S7: 13.9 min, *t*<sub>R</sub> *rel*-(1*S*,2'*R*)-S7: 18.8 min, 68:32 er.

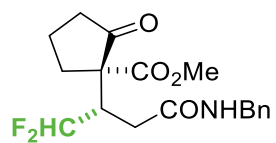

*rel*-(2*R*,2'*S*)-S7

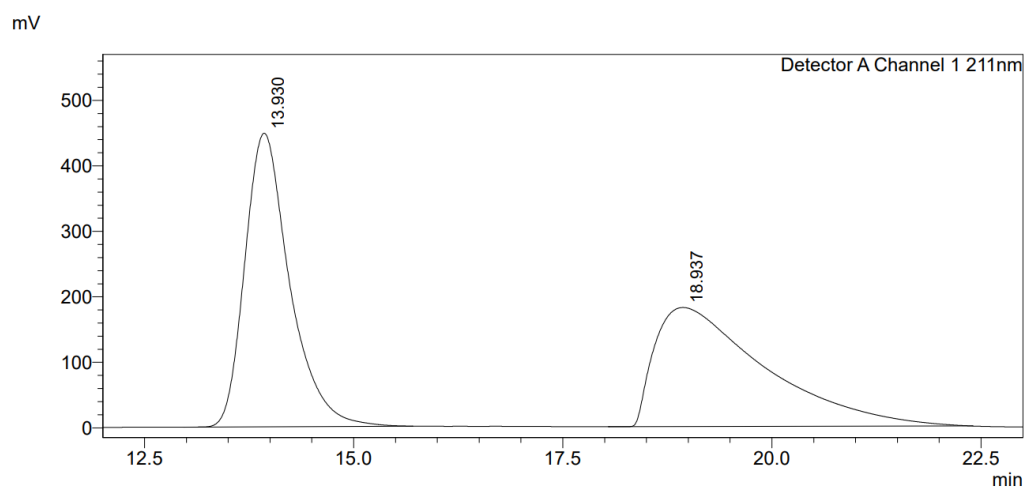

<Peak Table>

Detector A Channel 1 211nm

| Peak# | Ret. Time | Area%   |
|-------|-----------|---------|
| 1     | 13.930    | 50.118  |
| 2     | 18.937    | 49.882  |
| Total |           | 100.000 |

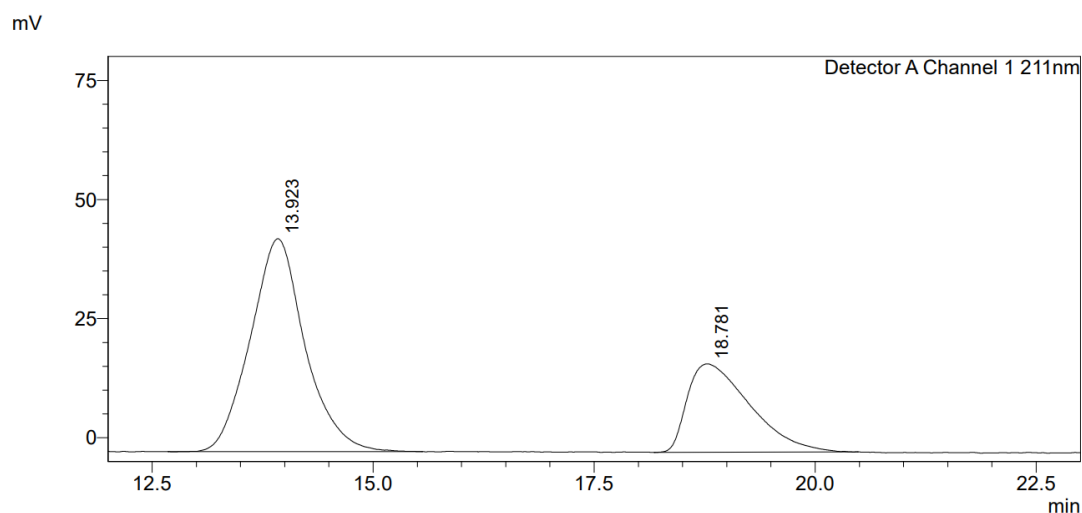

<Peak Table>

| Detector A Channel 1 211nm |           |         |
|----------------------------|-----------|---------|
| Peak#                      | Ret. Time | Area%   |
| 1                          | 13.923    | 67.829  |
| 2                          | 18.781    | 32.171  |
| Total                      |           | 100.000 |

(+)-(2*R*,3*R*) Ethyl 2-benzoyl-5-(benzylamino)-2-fluoro-5-oxo-3-(trifluoromethyl)pentanoate  
(2*R*,3*R*)-**S8** and *rel*-(2*S*,3*R*)-**S8**

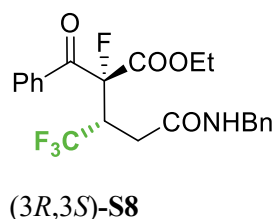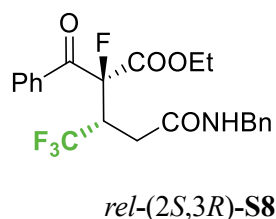

Analysed as a 67:33 mixture of diastereomers.

colorless oil;  $[\alpha]_D^{20} +0.25$  (*c* 0.8 in  $\text{CHCl}_3$ ); **IR**  $\nu_{\text{max}}$  (film) /  $\text{cm}^{-1}$  3302, 3067, 1755, 1653, 1541, 1231, 1128, 1028, 854;  **$^1\text{H}$  NMR** (500 MHz,  $\text{CDCl}_3$ )  $\delta_{\text{H}}$ : 1.20 (3H, t, *J* 7.2,  $\text{OCH}_2\text{CH}_3$ ), 2.45 (0.33H, dd, *J* 16.1, 3.0,  $\text{CH}_\text{A}\text{H}_\text{B}\text{CONHBn}$ ), 2.56 (0.33H, dd, *J* 16.3, 8.1,  $\text{CH}_\text{A}\text{H}_\text{B}\text{CONHBn}$ ), 2.60 (0.67H, dd, *J* 16.3, 5.4,  $\text{CH}_\text{A}\text{H}_\text{B}\text{CONHBn}$ ), 2.65 (0.67H, dd, *J* 16.3, 6.6,  $\text{CH}_\text{A}\text{H}_\text{B}\text{CONHBn}$ ), 4.07-4.33 (2H, m,  $\text{OCH}_2\text{CH}_3$ ), 4.35-4.64 (2.33H, m,  $\text{NHCH}_2\text{Bn}$ ,  $\text{CHCF}_3$ ), 4.57 (0.67H, dqdd, *J* 29.5, 8.1, 6.6, 5.4,  $\text{CHCF}_3$ ), 6.07 (0.33H, t (br), *J* 4.6, *NH*), 6.09 (0.67H, t (br), *J* 5.8, *NH*), 7.25-7.30 (3H, m,  $\text{CH}_2\text{PhC}^{2,4,6}\text{H}$ ), 7.30-7.35 (2H, m,  $\text{CH}_2\text{PhC}^{3,5}\text{H}$ ), 7.42-7.48 (2H, m,  $\text{COPhC}^{3,5}\text{H}$ ), 7.57-8.63 (1H, m,  $\text{COPhC}^4\text{H}$ ), 7.93-7.97 (1.34H, m,  $\text{COPhC}^{2,6}\text{H}$ ), 8.03-8.07 (0.66H, m,  $\text{COPhCC}^{2,6}\text{H}$ );  **$^{13}\text{C}\{^1\text{H}\}$  NMR** (126 MHz,  $\text{CDCl}_3$ )  $\delta_{\text{C}}$  13.7 ( $\text{OCH}_2\text{CH}_3$ , minor), 13.8 ( $\text{OCH}_2\text{CH}_3$ , major), 31.4 ( $\text{CH}_2\text{CONHBn}$ , major), 32.2 ( $\text{CH}_2\text{CONHBn}$ , minor), 44.1 ( $\text{NHCH}_2\text{Ph}$ , major and minor), 44.2 (qd, *J* 27.2, 19.8,  $\text{CHCF}_3$ , major), 44.6 (qd, *J* 27.1, 19.4,  $\text{CHCF}_3$ , minor), 63.7 ( $\text{OCH}_2\text{CH}_3$ , minor), 63.9 ( $\text{OCH}_2\text{CH}_3$ , major), 98.8 (d, *J* 207.3,  $\text{COCF}$ , minor), 99.2 (d, *J* 208.7,  $\text{COCF}$ , major), 125.5 (q, *J* 282.2,  $\text{CF}_3$ , major), 126.1 (q, *J* 281.6,  $\text{CF}_3$ , minor), 127.7

(CH<sub>2</sub>PhC<sup>4</sup>H, minor), 127.7 (CH<sub>2</sub>PhC<sup>4</sup>H, major), 127.9 (CH<sub>2</sub>PhC<sup>2,6</sup>H, major and minor), 128.7 (COPhC<sup>3,5</sup>H, major), 128.8<sub>1</sub> (CH<sub>2</sub>PhC<sup>3,5</sup>H, minor), 128.8<sub>4</sub> (COPhC<sup>3,5</sup>H, major), 128.9 (CH<sub>2</sub>PhC<sup>3,5</sup>H, minor), 129.8 (d, *J* 6.6, COPhC<sup>2,6</sup>H, major), 130.2 (d, *J* 6.3, CH<sub>2</sub>PhC<sup>2,6</sup>H, minor), 133.0 (d, *J* 3.5, COPhC<sup>1</sup>, minor), 133.7 (d, *J* 3.5, COPhC<sup>1</sup>, major), 134.1 (COPhC<sup>4</sup>H, major), 134.8 (COPhC<sup>4</sup>, minor), 137.9 (CH<sub>2</sub>PhC<sup>1</sup>, major), 138.0 (CH<sub>2</sub>PhC<sup>1</sup>, minor), 165.0 (d, *J* 25.7, COOEt, major), 165.3 (d, *J* 26.5, COOEt, minor), 168.0 (CONHBn, major), 168.3 (CONHBn, minor), 189.3 (d, *J* 24.9, COPh, minor), 190.9 (d, *J* 25.8, COPh, major); <sup>19</sup>F NMR (471 MHz, CDCl<sub>3</sub>) δ<sub>F</sub>: -169.02 (0.67F, dq, *J* 29.5, 11.5, CF), -167.97 (0.33F, dq, *J* 31.0, 8.6, CF), -66.44 (0.99F, app t, *J* 8.6, CF<sub>3</sub>), -64.00 (2.01F, dd, *J* 11.8, 8.1, CF<sub>3</sub>); HRMS (ESI<sup>+</sup>) C<sub>22</sub>H<sub>21</sub>F<sub>4</sub>O<sub>4</sub>NNa [M]<sup>+</sup> found 462.1299, requires 462.1304 (-2.2 ppm).

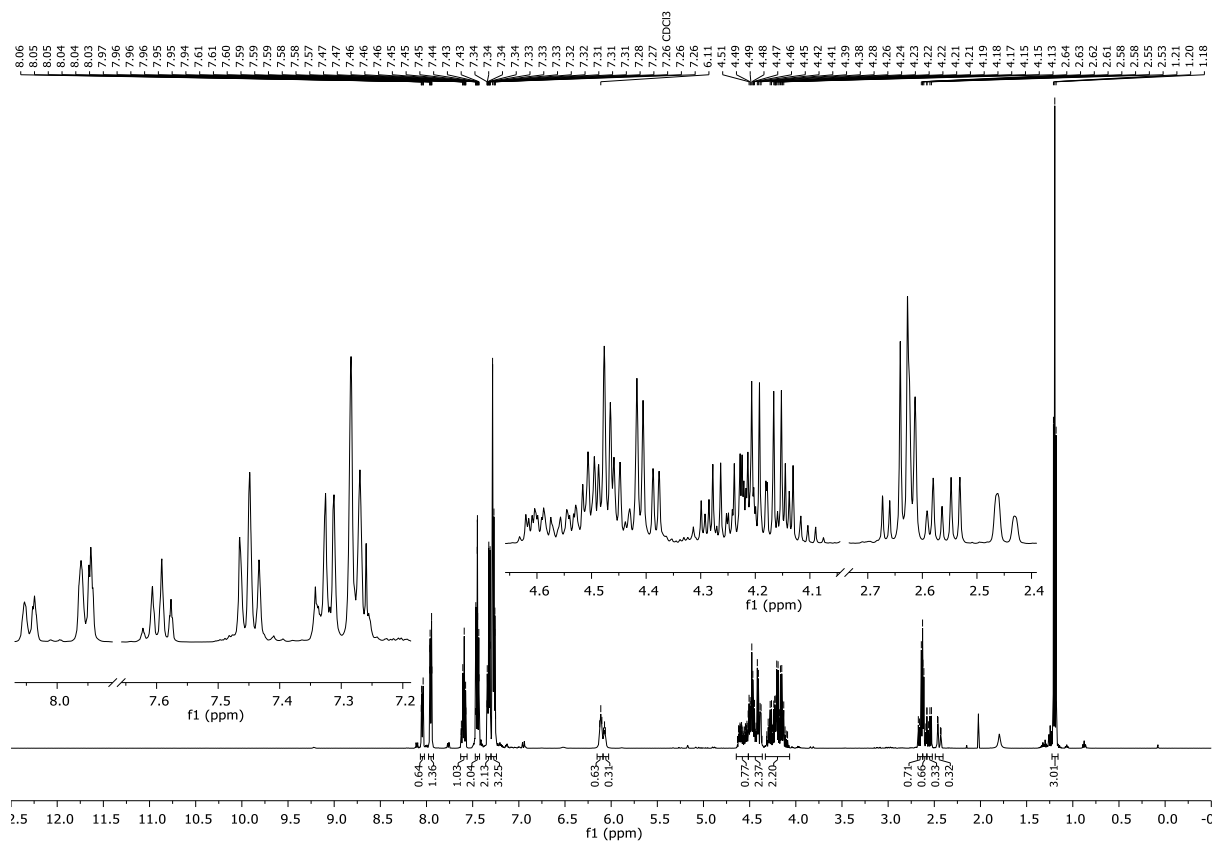

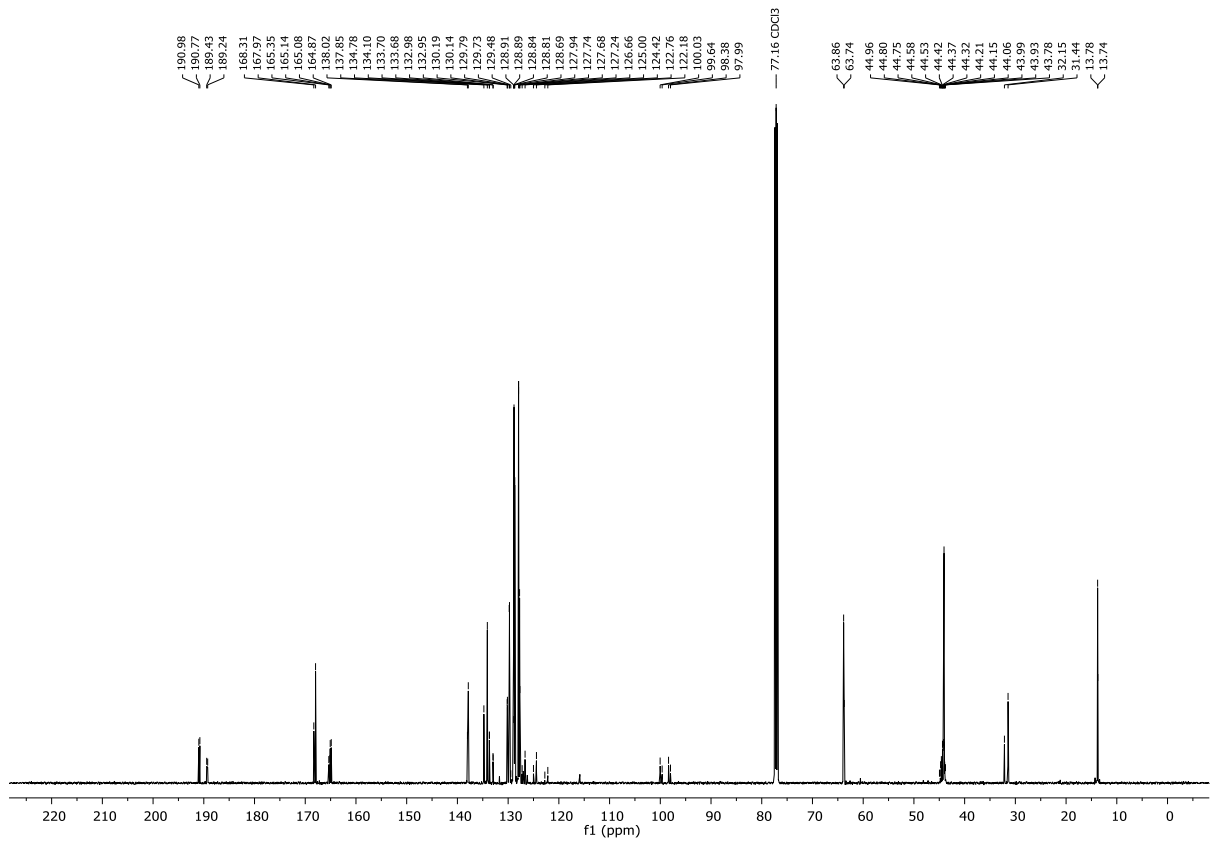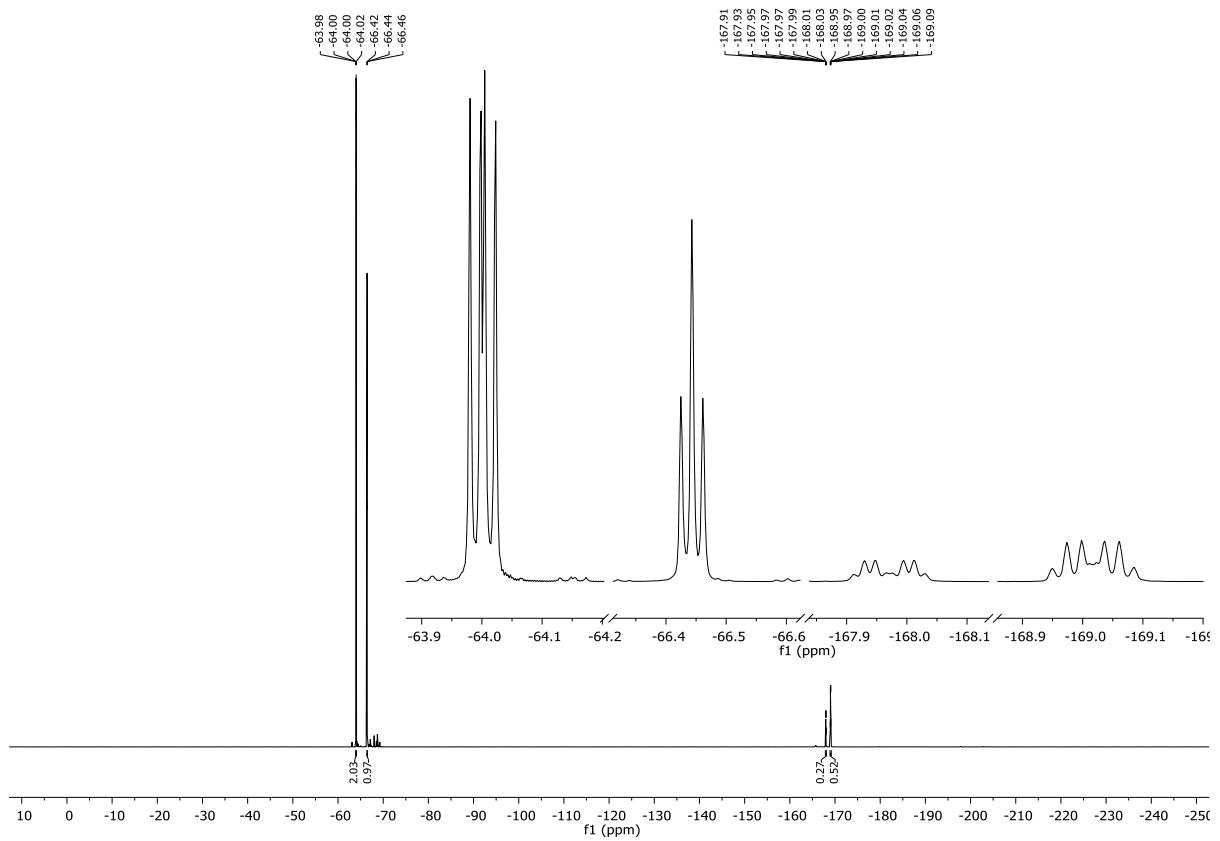

**Chiral HPLC analysis:** Chiralpak IA (95:5 hexane:IPA, flow rate 1.00 mL·min<sup>-1</sup>, 254 nm, 30 °C) t<sub>R</sub> (2*R*,2'*R*): 21.2 min, t<sub>R</sub> (2*S*,2'*S*): 33.8 min, 98:2 er (2*R*,3*R*)-S8; t<sub>R</sub> (major): 29.0 min, t<sub>R</sub> (minor): 37.0 min, 95:5 er (*anti*-),

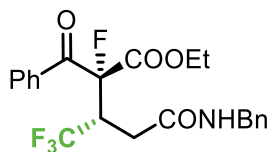

(3*R*,3*R*)-S8

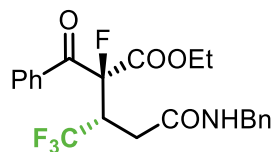

*rel*-(2*S*,3*R*)-S8

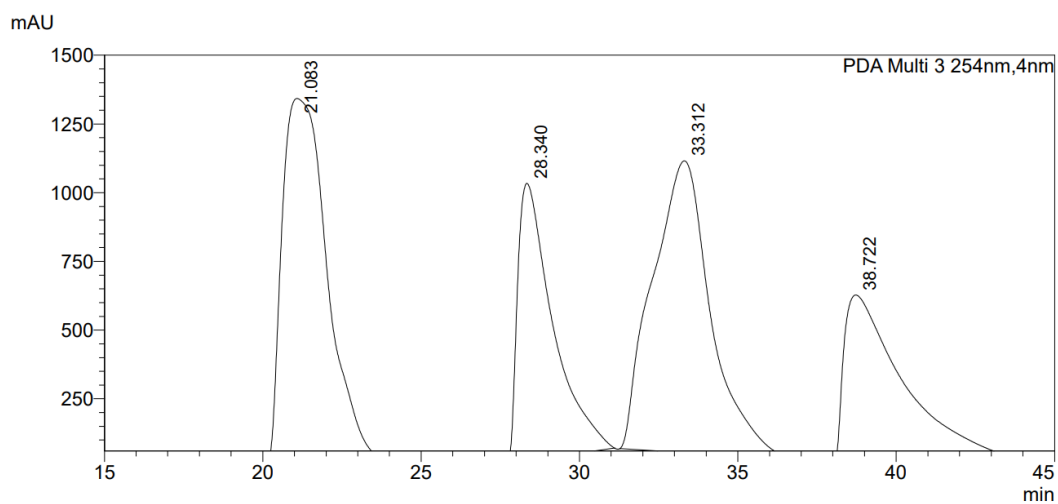

<Peak Table>

| PDA Ch3 254nm |           |         |
|---------------|-----------|---------|
| Peak#         | Ret. Time | Area%   |
| 1             | 21.083    | 31.312  |
| 2             | 28.340    | 18.001  |
| 3             | 33.312    | 31.441  |
| 4             | 38.722    | 19.246  |
| Total         |           | 100.000 |

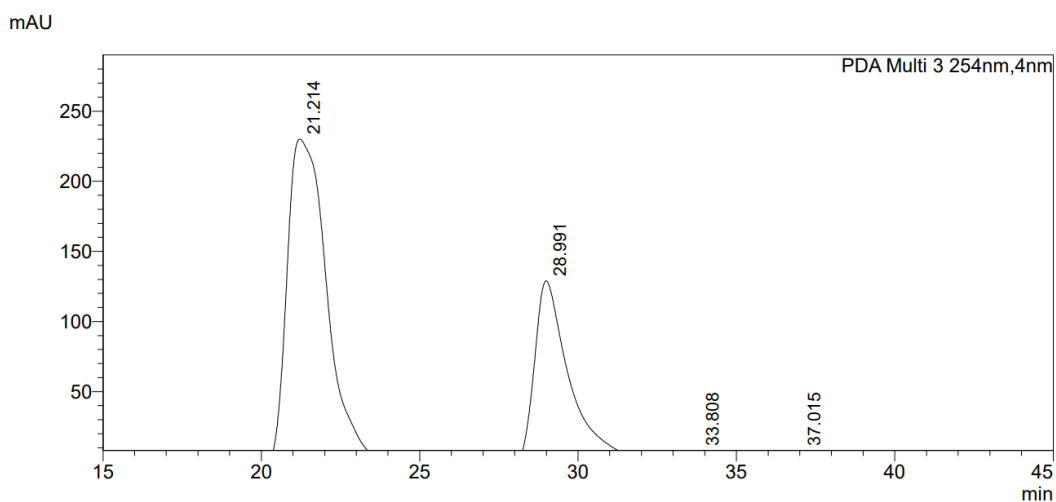

#### <Peak Table>

| PDA Ch3 254nm |           |         |
|---------------|-----------|---------|
| Peak#         | Ret. Time | Area%   |
| 1             | 21.214    | 63.772  |
| 2             | 28.991    | 31.994  |
| 3             | 33.808    | 3.314   |
| 4             | 37.015    | 0.920   |
| Total         |           | 100.000 |

### Competition Experiments

#### Scheme 5C

A mixture of (4-nitrophenyl) fumarate **26** (79.5 mg, 0.3 mmol), (2*S*,3*R*)-HyperBTM **1** (4.6 mg, 15  $\mu$ mol), methyl 2-oxocyclopentane-1-carboxylate **7** (44  $\mu$ L, 0.3 mmol), methyl 1-acetyl-3-oxoindoline-2-carboxylate **18** (69.9 mg, 0.3 mmol) in DMA (1.2 mL) was stirred for 16 h at room temperature. Benzylamine (33  $\mu$ L, 0.3 mmol) was then added, and the reaction was permitted to stir for 1 h. The solution was diluted with EtOAc, washed sequentially with saturated aqueous Na<sub>2</sub>CO<sub>3</sub> (3 $\times$ ), brine, and dried over MgSO<sub>4</sub>. The solvent was removed under reduced pressure. The ratio of product **19** and **13** was 86:14 calculated from the crude proton spectrum.

#### Scheme 5E

A mixture of methyl 1-acetyl-3-oxoindoline-2-carboxylate **18** (35.7 mg, 153  $\mu$ mol), (2*S*,3*R*)-HyperBTM **1** (2.4 mg, 7.65  $\mu$ mol), 4-nitrophenyl (*E*)-4,4,4-trifluorobut-2-enoate **8** (20 mg, 76.5  $\mu$ mol), 4-nitrophenyl (*Z*)-4,4,4-trifluorobut-2-enoate **25** (20 mg, 76.5  $\mu$ mol) in DMA (0.61 mL) was stirred for 16 h at room temperature. Benzylamine (16.7  $\mu$ L, 153  $\mu$ mol) was then added, and the reaction was permitted to stir for 1 h. The solution was diluted with EtOAc, washed sequentially with saturated aqueous Na<sub>2</sub>CO<sub>3</sub> (3 $\times$ ), brine, and dried over MgSO<sub>4</sub>. The solvent was removed under reduced pressure

and the residue was purified by column chromatography (1:1 EtOAc:Hexane) to give the title compound (38.9 mg, 55%, >95:5 dr, 74:26 er) as colourless oil.

**HPLC Data for 19 from 1:1 (E)/(Z)-ester mixture:** Chiralpak AD-H (90:10 hexane:iPrOH, flow rate 1.00 mL·min<sup>-1</sup>, 270 nm, 30 °C) t<sub>R</sub> (2*S*,2'*S*)-**19**: 48.2 min, t<sub>R</sub> (2*R*,2'*R*)-**19**: 70.8 min, 74:26 er.

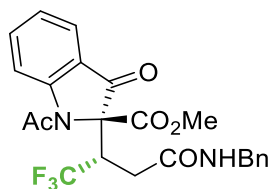

(2*S*,2'*S*)-**19**

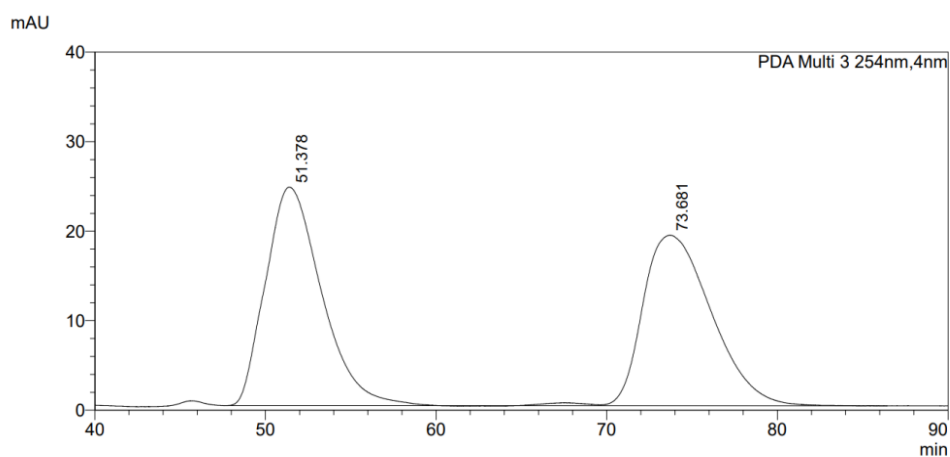

<Peak Table>

| PDA Ch3 254nm |           |         |
|---------------|-----------|---------|
| Peak#         | Ret. Time | Area%   |
| 1             | 51.378    | 51.052  |
| 2             | 73.681    | 48.948  |
| Total         |           | 100.000 |

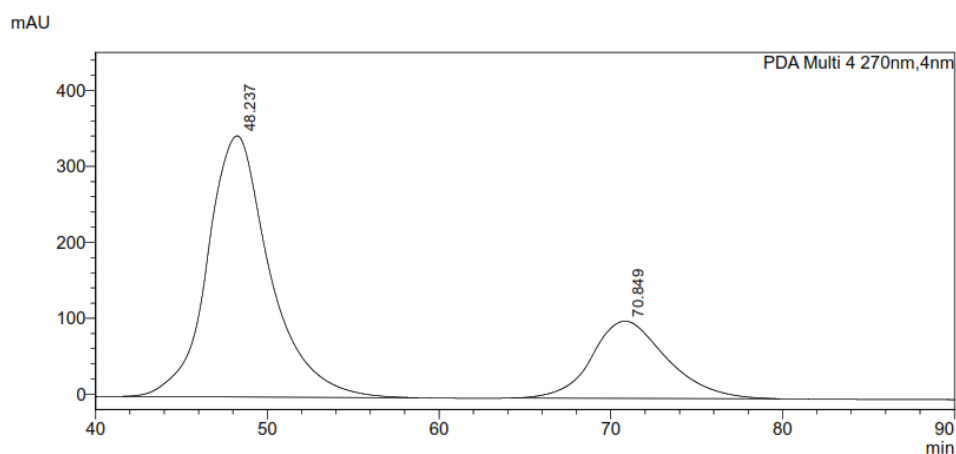

**<Peak Table>**

| PDA Ch4 270nm |           |         |
|---------------|-----------|---------|
| Peak#         | Ret. Time | Area%   |
| 1             | 48.237    | 73.802  |
| 2             | 70.849    | 26.198  |
| Total         |           | 100.000 |

## Determination of Product Configuration by X-Ray Crystallography

X-ray diffraction data for all compounds were collected at low temperature using a Rigaku MM-007HF High Brilliance RA generator/confocal optics [Cu K $\alpha$  radiation ( $\lambda = 1.54187 \text{ \AA}$ )] with XtaLAB P200 or P100 diffractometer. Intensity data for all compounds analysed were collected using either CrystalClear<sup>56</sup> (using either both  $\omega$  and  $\phi$  steps, or just  $\omega$  steps, and accumulating area detector images spanning at least a hemisphere of reciprocal space) or CrysAlisPro<sup>57</sup> (using a calculated strategy), and processed (including correction for Lorentz, polarization and absorption) using CrysAlisPro. Structures were solved by direct (SIR2011)<sup>58</sup> or dual-space (SHELXT)<sup>59</sup> methods and refined by full-matrix least-squares against  $F^2$  (SHELXL-2019/3).<sup>60</sup> Non-hydrogen atoms were refined anisotropically, and hydrogen atoms were refined using a riding model, except for nitrogen-bound hydrogens, which were located from the difference Fourier map and refined isotropically subject to a distance restraint. All calculations were performed using the Olex2<sup>61</sup> interface. Selected crystallographic data are presented in Table 1. CCDC 2298980-2298982 contains the supplementary crystallographic data for this paper. These data can be obtained free of charge from The Cambridge Crystallographic Data Centre via [www.ccdc.cam.ac.uk/structures](http://www.ccdc.cam.ac.uk/structures).

**Table S1.** Selected crystallographic data.

|      | <b>9</b> | <b>16</b> | <b>20</b> |
|------|----------|-----------|-----------|
| CCDC | 2298980  | 2298981   | 2298982   |



|                                                                    |                                                                |                                                                |                                                                                |
|--------------------------------------------------------------------|----------------------------------------------------------------|----------------------------------------------------------------|--------------------------------------------------------------------------------|
| formula                                                            | C <sub>19</sub> H <sub>22</sub> F <sub>3</sub> NO <sub>4</sub> | C <sub>23</sub> H <sub>22</sub> F <sub>3</sub> NO <sub>4</sub> | C <sub>23</sub> H <sub>21</sub> ClF <sub>2</sub> N <sub>2</sub> O <sub>5</sub> |
| fw                                                                 | 385.37                                                         | 433.41                                                         | 478.87                                                                         |
| crystal description                                                | Colourless prism                                               | Colourless rod                                                 | Colourless prism                                                               |
| crystal size [mm <sup>3</sup> ]                                    | 0.18×0.15×0.13                                                 | 0.49×0.09×0.09                                                 | 0.10×0.09×0.05                                                                 |
| temperature [K]                                                    | 173                                                            | 173                                                            | 125                                                                            |
| space group                                                        | <i>P</i> 2 <sub>1</sub> 2 <sub>1</sub> 2 <sub>1</sub>          | <i>P</i> 2 <sub>1</sub> 2 <sub>1</sub> 2 <sub>1</sub>          | <i>P</i> 2 <sub>1</sub> 2 <sub>1</sub> 2 <sub>1</sub>                          |
| <i>a</i> [Å]                                                       | 9.15002(4)                                                     | 9.9425(2)                                                      | 9.32874(6)                                                                     |
| <i>b</i> [Å]                                                       | 14.07250(7)                                                    | 18.8834(3)                                                     | 14.99320(9)                                                                    |
| <i>c</i> [Å]                                                       | 14.39225(7)                                                    | 22.2420(4)                                                     | 16.18409(11)                                                                   |
| vol [Å <sup>3</sup> ]                                              | 1853.199(15)                                                   | 4175.90(13)                                                    | 2263.63(3)                                                                     |
| <i>Z</i>                                                           | 4                                                              | 8                                                              | 4                                                                              |
| $\rho$ (calc) [g/cm <sup>3</sup> ]                                 | 1.381                                                          | 1.379                                                          | 1.405                                                                          |
| $\mu$ [mm <sup>-1</sup> ]                                          | 0.994                                                          | 0.951                                                          | 1.976                                                                          |
| F(000)                                                             | 808                                                            | 1808                                                           | 992                                                                            |
| reflections collected                                              | 21885                                                          | 50310                                                          | 26847                                                                          |
| independent reflections ( <i>R</i> <sub>int</sub> )                | 3801 (0.0124)                                                  | 7389 (0.0384)                                                  | 4647 (0.0230)                                                                  |
| parameters, restraints                                             | 249, 1                                                         | 569, 2                                                         | 304, 1                                                                         |
| GoF on <i>F</i> <sup>2</sup>                                       | 1.105                                                          | 1.014                                                          | 1.047                                                                          |
| <i>R</i> <sub><i>I</i></sub> [ <i>I</i> > 2 $\sigma$ ( <i>I</i> )] | 0.0315                                                         | 0.0257                                                         | 0.0254                                                                         |
| <i>wR</i> <sub>2</sub> (all data)                                  | 0.0826                                                         | 0.0677                                                         | 0.0678                                                                         |
| Flack <i>x</i>                                                     | 0.025(18)                                                      | -0.02(3)                                                       | 0.000(4)                                                                       |
| largest diff. peak/hole [e/Å <sup>3</sup> ]                        | 0.320, -0.279                                                  | 0.116, -0.174                                                  | 0.150, -0.333                                                                  |

## checkCIF/PLATON report

Structure factors have been supplied for datablock(s) 16, 20, 9

THIS REPORT IS FOR GUIDANCE ONLY. IF USED AS PART OF A REVIEW PROCEDURE FOR PUBLICATION, IT SHOULD NOT REPLACE THE EXPERTISE OF AN EXPERIENCED CRYSTALLOGRAPHIC REFEREE.

No syntax errors found.    CIF dictionary    Interpreting this report

### Datablock: 9

---

|                    |                                            |                    |               |
|--------------------|--------------------------------------------|--------------------|---------------|
| Bond precision:    | C-C = 0.0028 A                             | Wavelength=1.54184 |               |
| Cell:              | a=9.15002(4)                               | b=14.07250(7)      | c=14.39225(7) |
|                    | alpha=90                                   | beta=90            | gamma=90      |
| Temperature:       | 173 K                                      |                    |               |
|                    | Calculated                                 | Reported           |               |
| Volume             | 1853.199(15)                               | 1853.199(15)       |               |
| Space group        | P 21 21 21                                 | P 21 21 21         |               |
| Hall group         | P 2ac 2ab                                  | P 2ac 2ab          |               |
| Moiety formula     | C19 H22 F3 N O4                            | C19 H22 F3 N O4    |               |
| Sum formula        | C19 H22 F3 N O4                            | C19 H22 F3 N O4    |               |
| Mr                 | 385.38                                     | 385.37             |               |
| Dx, g cm-3         | 1.381                                      | 1.381              |               |
| Z                  | 4                                          | 4                  |               |
| Mu (mm-1)          | 0.994                                      | 0.994              |               |
| F000               | 808.0                                      | 808.0              |               |
| F000'              | 811.06                                     |                    |               |
| h, k, lmax         | 11, 17, 18                                 | 11, 17, 18         |               |
| Nref               | 3842[ 2196]                                | 3801               |               |
| Tmin, Tmax         | 0.836, 0.879                               | 0.957, 1.000       |               |
| Tmin'              | 0.836                                      |                    |               |
| Correction method= | # Reported T Limits: Tmin=0.957 Tmax=1.000 |                    |               |
| AbsCorr =          | MULTI-SCAN                                 |                    |               |
| Data completeness= | 1.73/0.99                                  | Theta(max)=        | 75.488        |
| R(reflections)=    | 0.0315( 3790)                              | wR2(reflections)=  | 0.0826( 3801) |
| S =                | 1.105                                      | Npar=              | 249           |

|                        | Calculated      | Reported        |
|------------------------|-----------------|-----------------|
| Volume                 | 4175.90(13)     | 4175.90(13)     |
| Space group            | P 21 21 21      | P 21 21 21      |
| Hall group             | P 2ac 2ab       | P 2ac 2ab       |
| Moiety formula         | C23 H22 F3 N O4 | C23 H22 F3 N O4 |
| Sum formula            | C23 H22 F3 N O4 | C23 H22 F3 N O4 |
| Mr                     | 433.42          | 433.41          |
| Dx, g cm <sup>-3</sup> | 1.379           | 1.379           |
| Z                      | 8               | 8               |
| Mu (mm <sup>-1</sup> ) | 0.951           | 0.951           |
| F000                   | 1808.0          | 1808.0          |
| F000'                  | 1814.67         |                 |
| h, k, lmax             | 11, 22, 26      | 11, 22, 26      |
| Nref                   | 7428 [ 4161]    | 7389            |
| Tmin, Tmax             | 0.902, 0.918    | 0.925, 1.000    |
| Tmin'                  | 0.634           |                 |

Correction method= # Reported T Limits: Tmin=0.925 Tmax=1.000  
AbsCorr = MULTI-SCAN

Data completeness= 1.78/0.99      Theta(max)= 66.880

R(reflections)= 0.0257( 7225)      wR2(reflections)=  
0.0677( 7389)

S = 1.014      Npar= 569

The following ALERTS were generated. Each ALERT has the format  
**test-name\_ALERT\_alert-type\_alert-level**.  
Click on the hyperlinks for more details of the test.

---

**Alert level C**

|                                                                 |           |
|-----------------------------------------------------------------|-----------|
| PLAT089_ALERT_3_C Poor Data / Parameter Ratio (Zmax < 18) ..... | 7.31 Note |
| PLAT911_ALERT_3_C Missing FCF Refl Between Tmin & STh/L= 0.596  | 5 Report  |

---

**Alert level G**

|                                                                    |           |
|--------------------------------------------------------------------|-----------|
| PLAT002_ALERT_2_G Number of Distance or Angle Restraints on AtSite | 4 Note    |
| PLAT172_ALERT_4_G The CIF-Embedded .res File Contains DFIX Records | 1 Report  |
| PLAT242_ALERT_2_G Low 'MainMol' Ueq as Compared to Neighbors of    | C21 Check |
| PLAT242_ALERT_2_G Low 'MainMol' Ueq as Compared to Neighbors of    | C51 Check |
| PLAT860_ALERT_3_G Number of Least-Squares Restraints .....         | 2 Note    |
| PLAT909_ALERT_3_G Percentage of I>2sig(I) Data at Theta(Max) Still | 92% Note  |
| PLAT978_ALERT_2_G Number C-C Bonds with Positive Residual Density. | 2 Info    |

---

0 **ALERT level A** = Most likely a serious problem - resolve or explain  
0 **ALERT level B** = A potentially serious problem, consider carefully  
2 **ALERT level C** = Check. Ensure it is not caused by an omission or oversight



---

The following ALERTS were generated. Each ALERT has the format

**test-name\_ALERT\_alert-type\_alert-level.**

Click on the hyperlinks for more details of the test.

---

● **Alert level C**

|                   |                                                  |       |       |        |
|-------------------|--------------------------------------------------|-------|-------|--------|
| PLAT911_ALERT_3_C | Missing FCF Refl Between Thmin & STh/L=          | 0.600 | 4     | Report |
| PLAT918_ALERT_3_C | Reflection(s) with I(obs) much Smaller I(calc) . |       | 4     | Check  |
| PLAT934_ALERT_3_C | Number of (Iobs-Icalc)/Sigma(W) > 10 Outliers .. |       | 1     | Check  |
| PLAT939_ALERT_3_C | Large Value of Not (SHELXL) Weight Optimized S . |       | 18.78 | Check  |

---

● **Alert level G**

|                   |                                                  |         |     |              |
|-------------------|--------------------------------------------------|---------|-----|--------------|
| PLAT002_ALERT_2_G | Number of Distance or Angle Restraints on AtSite |         | 2   | Note         |
| PLAT142_ALERT_4_G | s.u. on b - Axis Small or Missing .....          | 0.00007 |     | Ang.         |
| PLAT143_ALERT_4_G | s.u. on c - Axis Small or Missing .....          | 0.00007 |     | Ang.         |
| PLAT172_ALERT_4_G | The CIF-Embedded .res File Contains DFIX Records |         | 1   | Report       |
| PLAT242_ALERT_2_G | Low 'MainMol' Ueq as Compared to Neighbors of    |         | C17 | Check        |
| PLAT860_ALERT_3_G | Number of Least-Squares Restraints .....         |         | 1   | Note         |
| PLAT912_ALERT_4_G | Missing # of FCF Reflections Above STh/L=        | 0.600   | 11  | Note         |
| PLAT913_ALERT_3_G | Missing # of Very Strong Reflections in FCF .... |         | 3   | Note         |
| PLAT961_ALERT_5_G | Dataset Contains no Negative Intensities .....   |         |     | Please Check |
| PLAT978_ALERT_2_G | Number C-C Bonds with Positive Residual Density. |         | 2   | Info         |

---

0 **ALERT level A** - Most likely a serious problem - resolve or explain  
0 **ALERT level B** - A potentially serious problem, consider carefully  
4 **ALERT level C** - Check. Ensure it is not caused by an omission or oversight  
10 **ALERT level G** - General information/check it is not something unexpected

0 ALERT type 1 CIF construction/syntax error, inconsistent or missing data  
3 ALERT type 2 Indicator that the structure model may be wrong or deficient  
6 ALERT type 3 Indicator that the structure quality may be low  
4 ALERT type 4 Improvement, methodology, query or suggestion  
1 ALERT type 5 Informative message, check

---

## Datablock: 16

---

|                 |                |                    |               |
|-----------------|----------------|--------------------|---------------|
| Bond precision: | C-C = 0.0028 A | Wavelength=1.54184 |               |
| Cell:           | a=9.9425 (2)   | b=18.8834 (3)      | c=22.2420 (4) |
|                 | alpha=90       | beta=90            | gamma=90      |
| Temperature:    | 173 K          |                    |               |

It is advisable to attempt to resolve as many as possible of the alerts in all categories. Often the minor alerts point to easily fixed oversights, errors and omissions in your CIF or refinement strategy, so attention to these fine details can be worthwhile. In order to resolve some of the more serious problems it may be necessary to carry out additional measurements or structure refinements. However, the purpose of your study may justify the reported deviations and the more serious of these should normally be commented upon in the discussion or experimental section of a paper or in the "special\_details" fields of the CIF. checkCIF was carefully designed to identify outliers and unusual parameters, but every test has its limitations and alerts that are not important in a particular case may appear. Conversely, the absence of alerts does not guarantee there are no aspects of the results needing attention. It is up to the individual to critically assess their own results and, if necessary, seek expert advice.

#### Publication of your CIF in IUCr journals

A basic structural check has been run on your CIF. These basic checks will be run on all CIFs submitted for publication in IUCr journals (*Acta Crystallographica*, *Journal of Applied Crystallography*, *Journal of Synchrotron Radiation*); however, if you intend to submit to *Acta Crystallographica Section C* or *E* or *IUCrData*, you should make sure that full publication checks are run on the final version of your CIF prior to submission.

#### Publication of your CIF in other journals

Please refer to the *Notes for Authors* of the relevant journal for any special instructions relating to CIF submission.

---

PLATON version of 06/07/2023; check.def file version of 30/06/2023

Datablock 9 - ellipsoid plot

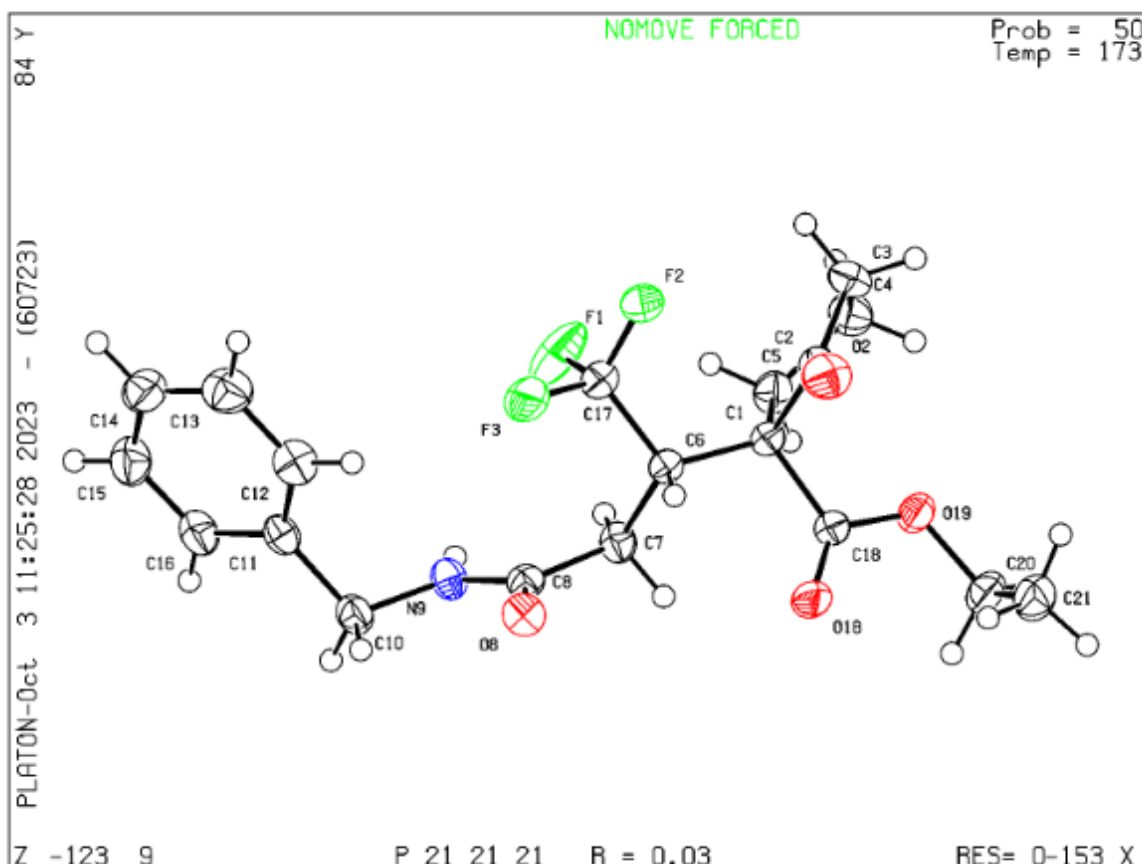

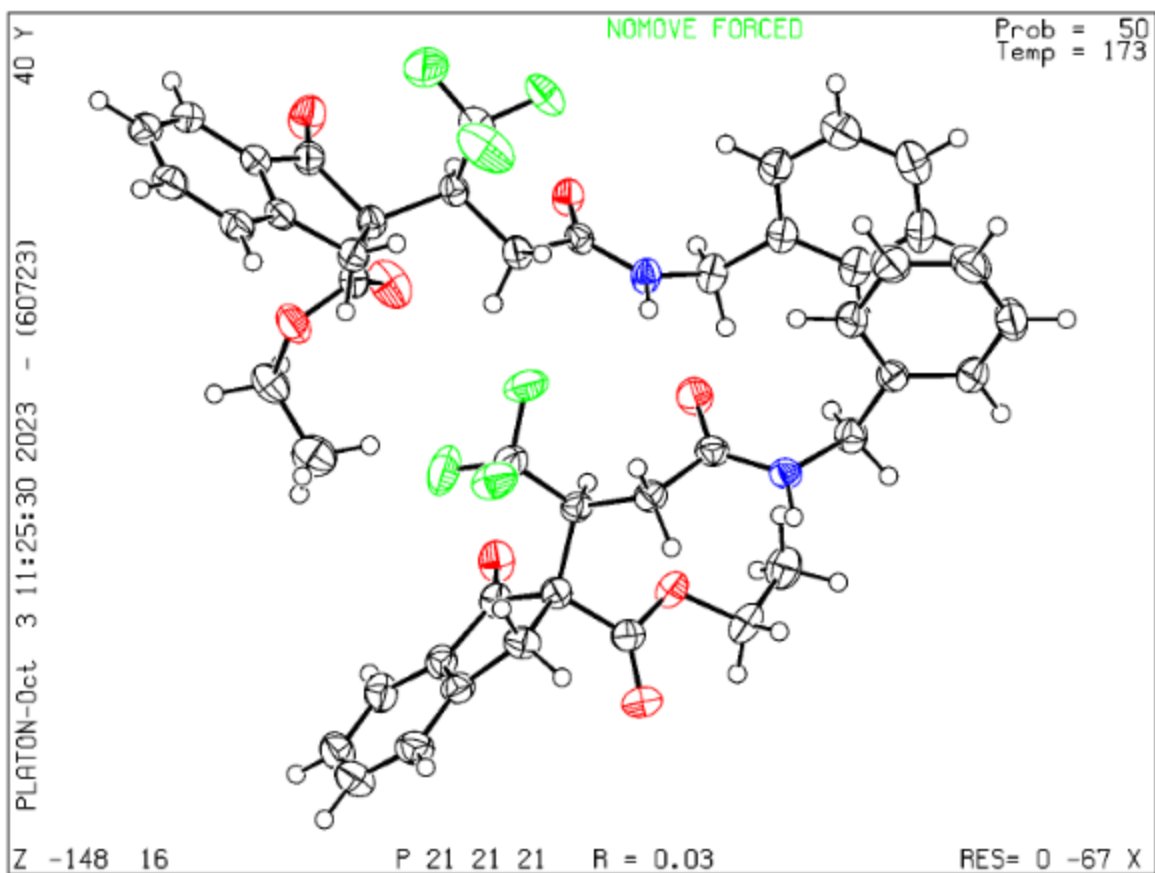

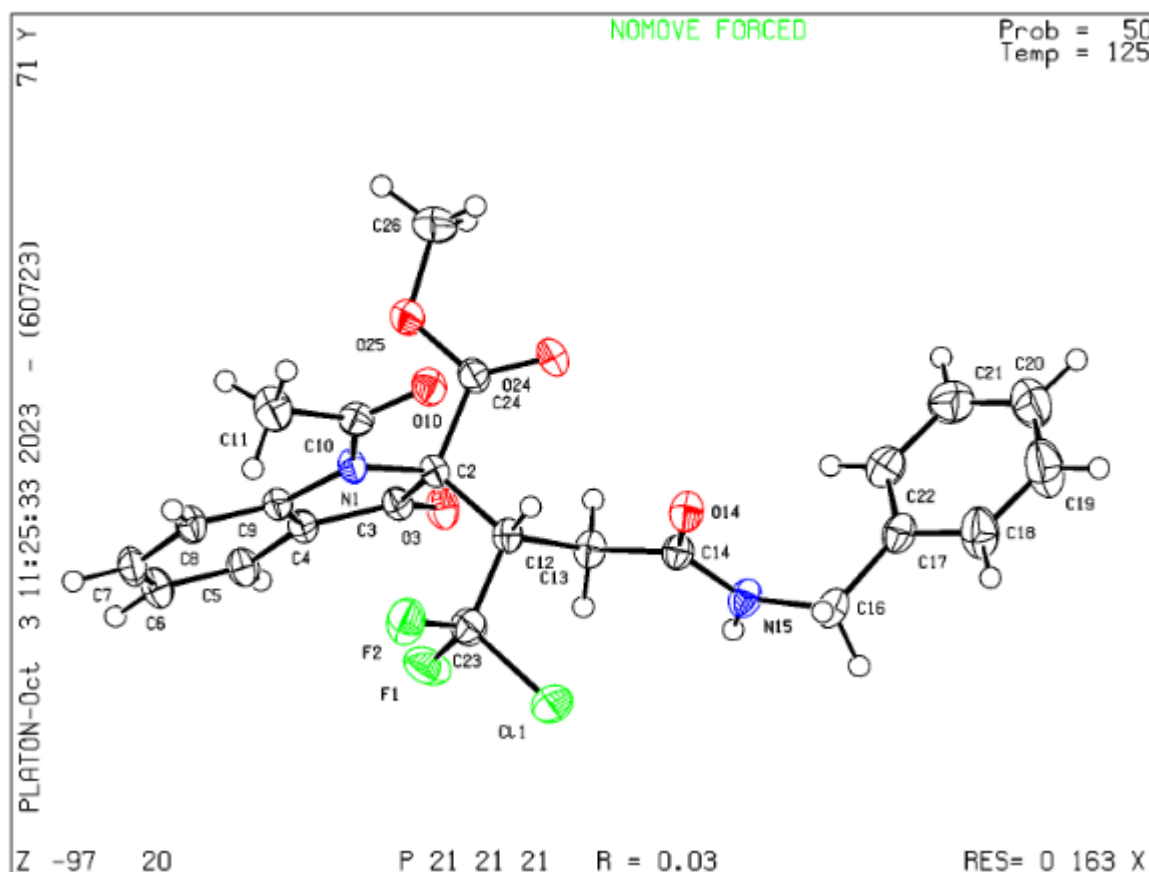

## Computational Details

The DFT methodology was chosen based on previous work in the group,<sup>62</sup> originally based on methodology by Wang *et al.*<sup>63</sup> Geometry optimisations were performed with the *meta*-hybrid M06-2X functional<sup>64</sup> using the double- $\zeta$ , def2-SVP basis set from the redefinition of the Ahlrichs family of basis sets.<sup>65-68</sup> Implicit solvation was considered through the use of the SMD model employing the parameters of *N,N*-dimethylacetamide ( $\epsilon = 37.781$ ).<sup>69</sup> An ultrafine integration grid (99 radial shells with 590 angular points per shell) was used for all calculations and all species were formally treated as closed-shell systems with restricted Kohn-Sham DFT used throughout. The nature of minima and transition states located were verified by the computation of harmonic frequencies at the same level of theory. Single-point energies ( $E_{sp}$ ) were also evaluated using the M06-2X functional<sup>64</sup> with a larger, triple- $\zeta$ , def2-TZVP basis. Implicit solvation was included at this level of theory using the same ultrafine integration grid (99,590). Additional empirical dispersion corrections were not included as the functional implicitly accounts for dispersion due to the nature of its construction. Preliminary calculations were performed using IEF-PCM<sup>70, 71</sup> as a solvent model and will be made clear where relevant. Thermochemistry was evaluated at 1 atm and 298.15 K using thermodynamic calculations at the level of geometry optimisation (thermal corrections to enthalpy,  $dH_{298.15}$ , and entropies  $S_{298.15}$ ) in combination with energetics obtained from single-point calculations. Gibbs free energy was calculated at 298 K using Equation 1. All



computations were performed using the Gaussian16, C.01 programme<sup>72</sup> with visualisation of structures using CYLview20<sup>73</sup> and GaussView6.1.1<sup>72</sup> and the visualisation of non-covalent interactions performed using NCIPLOT 4.0<sup>74</sup> and VMD.<sup>75</sup>

$$G_{298.15} = E_{sp} + dH_{298.15} - TS_{298.15} \quad (1)$$

### Conformational Flexibility (PCM//PCM)

Approach of the three substrates can be from either face of the catalyst, with either face of the substrate, with rotations around staggered conformations of the forming bond and with possible inversion of the ester group.

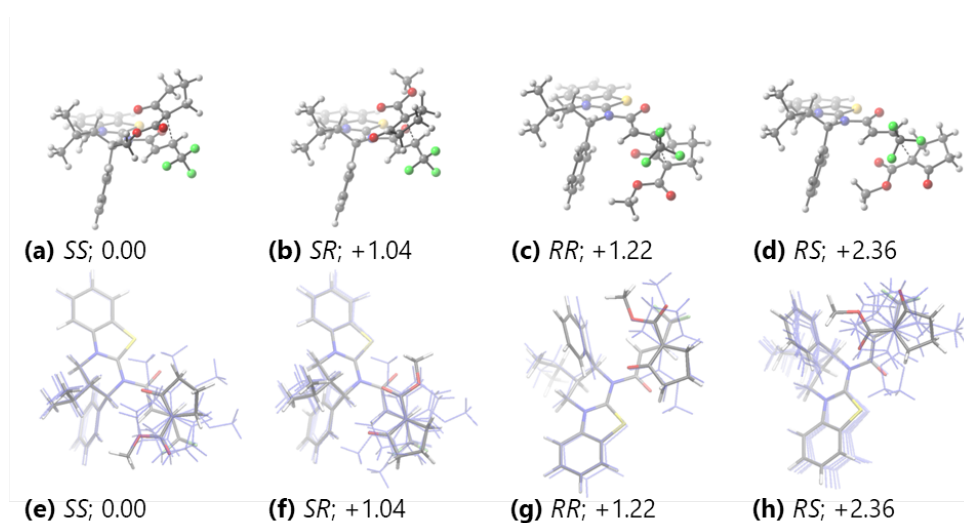

**Figure S1** Transition states for the four different diastereoisomers of substrate **9** at the M06-2X<sub>PCM</sub>/def2-TZVP//M06-2X<sub>PCM</sub>/def2-SVP level. The most stable located transition state for each is highlighted **a-d**, with additional conformations shown as stick representations in **e-h**. Relative energies are shown as  $DDG_{298}$  in kcal/mol.

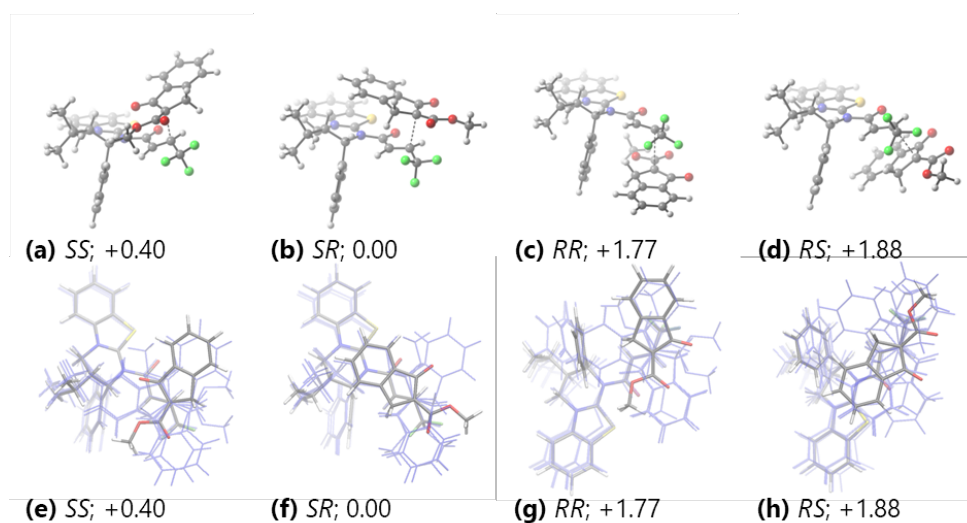

**Figure S2** Transition states for the four different diastereoisomers of substrate **16** at the M06-2X<sub>PCM</sub>/def2-TZVP//M06-2X<sub>PCM</sub>/def2-SVP level. The most stable located transition state for each is highlighted **a-d**, with additional conformations shown as stick representations in **e-h**. This leads to the incorrect identification of the major diastereomer. Relative energies are shown as DDG<sub>298</sub> in kcal/mol.

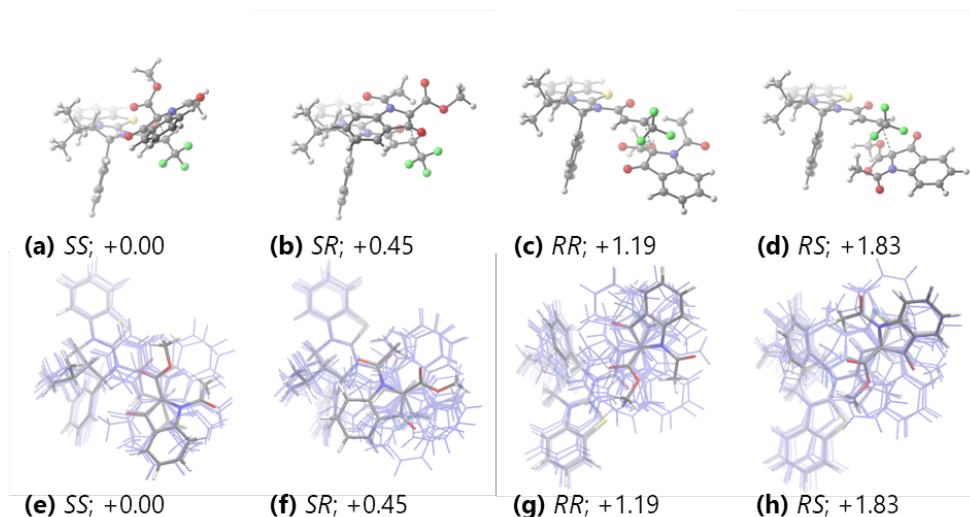

**Figure S3** Transition states for the four different diastereoisomers of substrate **19** at the M06-2X<sub>PCM</sub>/def2-TZVP//M06-2X<sub>PCM</sub>/def2-SVP level. The most stable located transition state for each is highlighted **a-d**, with additional conformations shown as stick representations in **e-h**. Relative energies are shown as DDG<sub>298</sub> in kcal/mol.

#### Conformational Flexibility (SMD//SMD)

Following incorrect identification of one major diastereomer with PCM solvation, SMD was used as the solvent model to repeat the conformational search for the top-face approach.

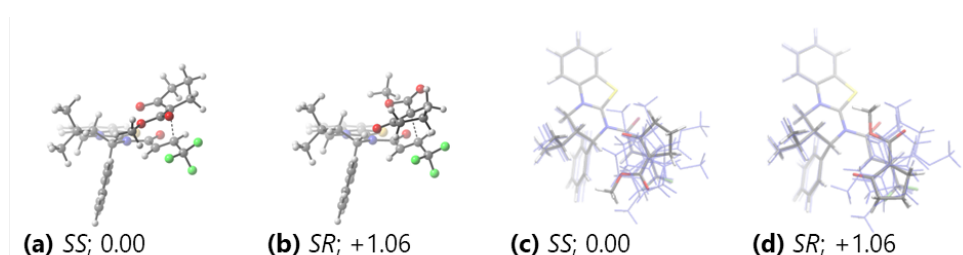

**Figure S4** Transition states for the two diastereoisomers of substrate **9** arising from the top-face approach of the nucleophile (M06-2X<sub>SMD</sub>/def2-TZVP//M06-2X<sub>SMD</sub>/def2-SVP level). The most stable located transition state for each is highlighted **a-b**, with additional conformations shown as stick representations in **c-d**. Relative energies are shown as DDG<sub>298</sub> in kcal/mol.

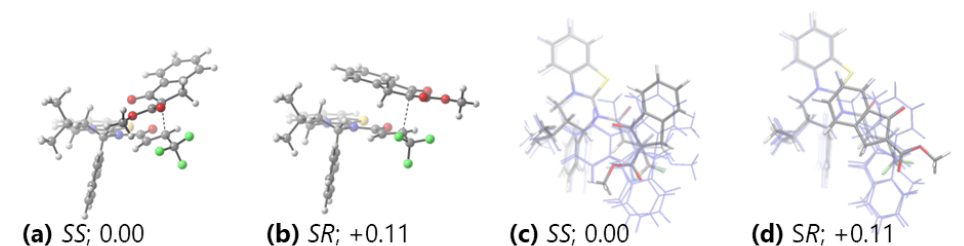

**Figure S5** Transition states for the two diastereoisomers of substrate **16** arising from the top-face approach of the nucleophile (M06-2X<sub>SMD</sub>/def2-TZVP//M06-2X<sub>SMD</sub>/def2-SVP level). The most stable located transition state for each is highlighted **a-b**, with additional conformations shown as stick representations in **c-d**. Relative energies are shown as DDG<sub>298</sub> in kcal/mol.

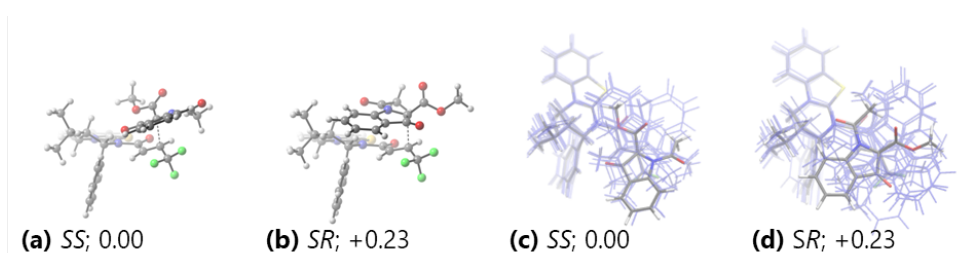

**Figure S6** Transition states for the two diastereoisomers of substrate **19** arising from the top-face approach of the nucleophile (M06-2X<sub>SMD</sub>/def2-TZVP//M06-2X<sub>SMD</sub>/def2-SVP level). The most stable located transition state for each is highlighted **a-b**, with additional conformations shown as stick representations in **c-d**. Relative energies are shown as DDG<sub>298</sub> in kcal/mol.

#### Visualisation of non-covalent interactions (SMD//SMD)

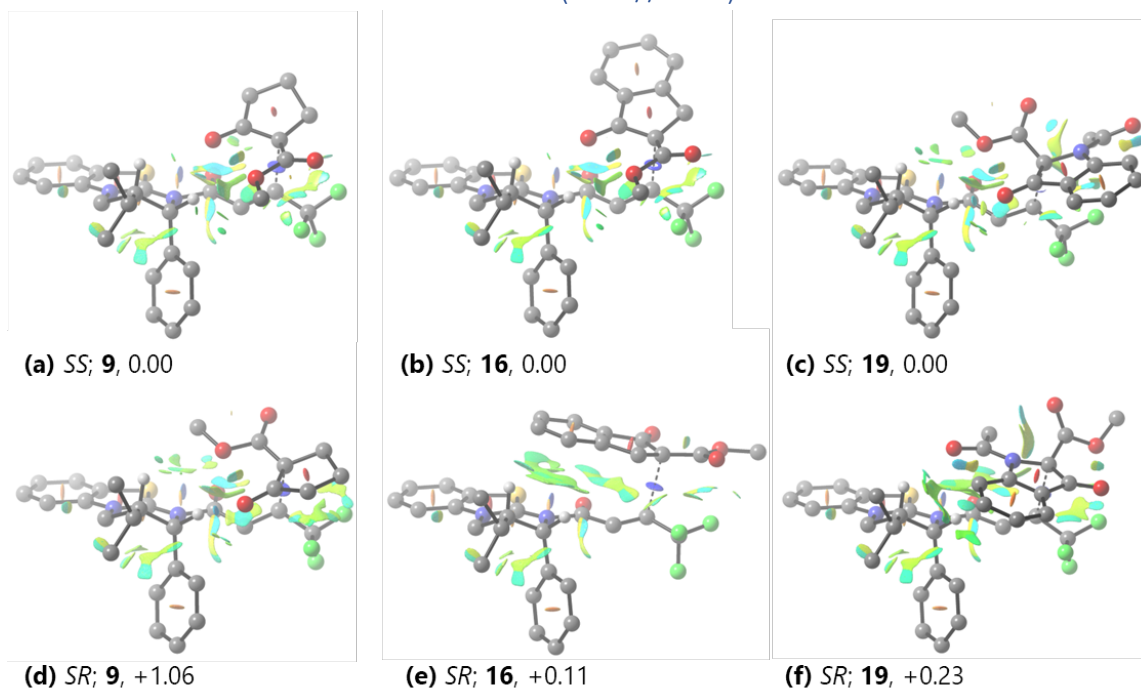

**Figure S7** Non-covalent interactions for the most favourable diastereomeric transition states have been visualised, with areas of attractive interactions shown in green (M06-2X<sub>SMD</sub>/def2-TZVP//M06-2X<sub>SMD</sub>/def2-SVP level). **a-c)** major TS for each substrate; **d-f)** minor TS for each substrate. Visualisation has been performed using NCIPLOT 4.0.<sup>74</sup> Relative energies are shown as DDG<sub>298</sub> in kcal/mol.

### Comparison of solvent models

The PCM solvent model was found to incorrectly identify the major diastereomer of **16**. These are strongly zwitterionic TSs with very strong dipole moments ( $m_{SS} = 19.84$  D;  $m_{SR} = 29.54$  D). SMD performs better than PCM which appears to overstabilise the solvent contribution for the minor diastereoisomer relative to the major diastereomer (Table S2).

**Table S2** Difference in Gibbs Free Energy between the two diastereomeric transition states with different solvent models in single-point calculations (corresponding to the top-face approach). Energies are shown in kcal/mol.

| Method    | DDG <sub>298</sub> | dr            |
|-----------|--------------------|---------------|
| PCM//PCM  | 0.40 (SR)          | 66:34 (SR:SS) |
| none//PCM | 10.97 (SS)         | <1:99 (SR:SS) |
| SMD//PCM  | 0.55 (SS)          | 28:72 (SR:SS) |
| SMD//SMD  | 0.11 (SS)          | 45:55 (SR:SS) |
| none/SMD  | 10.97 (SS)         | <1:99 (SR:SS) |
| PCM//SMD  | 0.76 (SR)          | 78:22 (SR:SS) |

Between the two diastereoisomers, there is a significant difference of 10 D between the dipole moments, strongly impacting the magnitude of solvent correction for each structure. This “solvent correction” can be simply calculated as the difference between solvated single-point energy and gas phase single-point energy ( $dE_{\text{solv}} = E_{\text{solv}} - E_{\text{gas}}$ ).

**Table S3** Solvent correction obtained from different solvent models. Energies are shown in kcal/mol.

| Method   | $dE_{\text{solv}} SS$ | $dE_{\text{solv}} SR$ | $DdE_{\text{solv}}$ |
|----------|-----------------------|-----------------------|---------------------|
| PCM//PCM | -20.28                | -31.65                | 11.37               |
| SMD//PCM | -33.39                | -43.80                | 10.42               |
| SMD//SMD | -33.86                | -44.17                | 10.31               |
| PCM//SMD | -20.51                | -31.69                | 11.18               |

SMD has a larger solvent correction (Table S3) arising from stronger interactions with a smaller solvent shell and from parameterised dispersive interactions between the solute and the 1<sup>st</sup> solvent shell. Importantly there is a smaller difference between solvent contribution of the two diastereoisomers ( $DdE_{\text{solv}}$ ) slightly reducing the relative stability of the observed minor TS.

One influencing factor may be in the construction of the cavity, which slightly varies between the two methods. PCM uses scaled vdW radii of 1.10 and SMD uses unscaled vdW radii ( $\alpha = 1.00$ ). The scaling of the PCM radii has been explored (Table S4). Note the larger change in solvation energy for the *SS* structure between the unscaled  $\text{PCM}^{\alpha=1.00}$ //PCM (-26.52) and SMD//PCM (-33.39) compared to the *SR* structure,  $\text{PCM}^{\alpha=1.00}$ //PCM (-39.41) and SMD//PCM (-43.80) which indicates stronger additional stabilisation for *SS* with the same radii.

**Table S4** Comparison of energetics using PCM with varied vdW scaling ( $\alpha$ ). Energies are shown in kcal/mol.

| Method                           | $dE_{\text{solv}} SS$ | $dE_{\text{solv}} SR$ | $DdE_{\text{solv}}$ | $ \text{DDG}_{298} $ | $dr$                                 |
|----------------------------------|-----------------------|-----------------------|---------------------|----------------------|--------------------------------------|
| $\text{PCM}^{\alpha=1.00}$ //PCM | -26.52                | -39.41                | 12.89               | 1.92 ( <i>SR</i> )   | 96:4 ( <b><i>SR</i>:<i>SS</i></b> )  |
| $\text{PCM}^{\alpha=1.05}$ //PCM | -23.08                | -35.23                | 12.15               | 1.18 ( <i>SR</i> )   | 88:12 ( <b><i>SR</i>:<i>SS</i></b> ) |
| $\text{PCM}^{\alpha=1.10}$ //PCM | -20.28                | -31.65                | 11.37               | 0.40 ( <i>SR</i> )   | 66:34 ( <b><i>SR</i>:<i>SS</i></b> ) |

|                                               |        |        |       |                    |                        |
|-----------------------------------------------|--------|--------|-------|--------------------|------------------------|
| PCM <sup><math>\alpha=1.15</math></sup> //PCM | -17.90 | -28.52 | 10.62 | 0.35 ( <i>SS</i> ) | 36:64 ( <i>SR:SS</i> ) |
| PCM <sup><math>\alpha=1.20</math></sup> //PCM | -15.93 | -25.85 | 9.92  | 1.05 ( <i>SS</i> ) | 14:86 ( <i>SR:SS</i> ) |

Clearly the solvation energy is strongly influenced by the cavity size and is in a fine balance to lead to the correct diastereoisomer.

SMD builds on the IEF-PCM model and accounts for both bulk electrostatic contributions and an additional short-range interaction between the solute and solvent molecules in the first solvation shell.<sup>69</sup> This model is designed to improve the description of solvent interacting in ways other than by pure electrostatics. Elsewhere, SMD has been found to offer an improvement over PCM in highly polar solvents in the context of solvatochromism.<sup>76</sup>

Similarly, the inclusion of a single explicit solvent molecule placed below the isothiuronium catalyst (PCM//PCM) reduced  $DDG_{298}$  from 0.40 (*SR*) to 0.24 (*SR*), perhaps indicating an improvement in solvent description. Extending this to a second solvent molecule, placed above the isothiuronium catalyst led to  $DDG_{298} = 1.05$  (*SS*) in agreement with the observed major diastereomer (PCM//PCM). This form of QM described, explicit solvation allows for additional non-covalent interactions between the solute and solvent alongside the electrostatic stabilisation from implicit solvation.

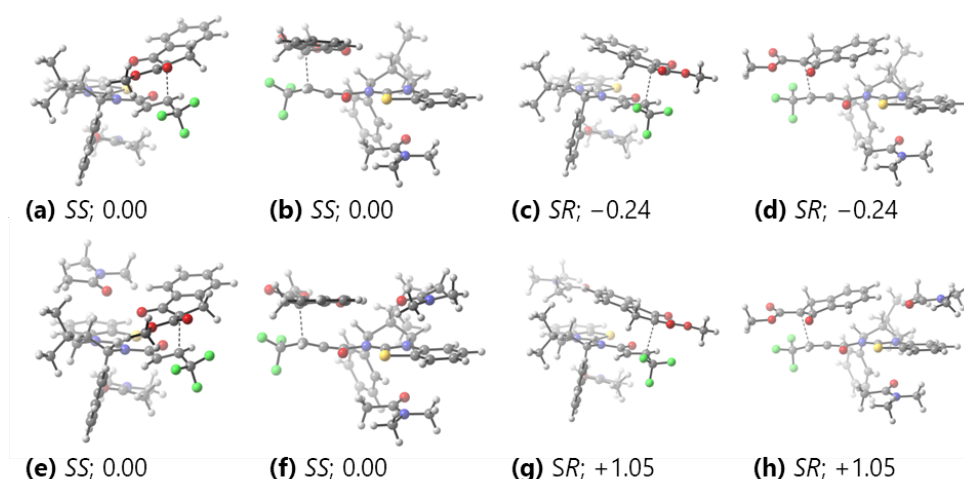

**Figure S8** Explicit solvation of diastereomeric transition states for substrate **16** (M06-2X<sub>PCM</sub>/def2-TZVP//M06-2X<sub>PCM</sub>/def2-SVP level). **a,b**) alternate views of mono-solvated *SS* TS; **c,d**) alternate views of mono-solvated *SR* TS; **e,f**) alternate views of bi-solvated *SS* TS; **g,h**) alternate views of bi-solvated *SR* TS. Energies are shown as  $DDG_{298}$  in kcal/mol.

If the micro-solvation has improved the description of solvation, the difference between PCM and SMD should be reduced. SMD single-points on the mono-solvated transition state (SMD//PCM), calculated  $DDG = 0.89$ , 82:18 dr (*SS*) – different from the PCM//PCM single-point which still favoured *SR*. However, with the bi-solvated transition states (SMD//PCM), calculated  $DDG = 0.43$ , 67:33 dr (*SS*) – same as the PCM//PCM single-point. The inclusion of these solvent molecules both improves the description of the solute to the 1<sup>st</sup> coordination sphere and reduces the difference between the two solvent models.

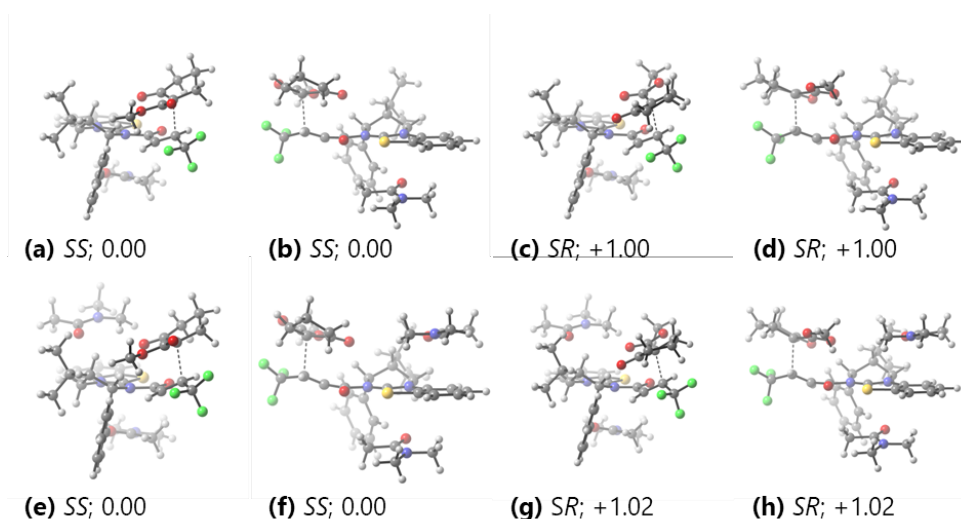

**Figure S9** Explicit solvation of diastereomeric transition states for substrate **9** (M06-2X<sub>PCM</sub>/def2-TZVP//M06-2X<sub>PCM</sub>/def2-SVP level). **a,b**) alternate views of mono-solvated *SS* TS; **c,d**) alternate views of mono-solvated *SR* TS; **e,f**) alternate views of bi-solvated *SS* TS; **g,h**) alternate views of bi-solvated *SR* TS. Energies are shown as  $DDG_{298}$  kcal/mol.

To ensure this was not artificial, we found that explicit solvation made no change to the predicted major diastereomer of substrate **9** unlike substrate **16**. The  $DDG$  was 1.04 kcal/mol (*SS*) with no explicit solvent (PCM//PCM) which is in line with the computed  $DDG = 1.02$  (*SS*) with explicit solvation in Figure S9 (PCM//PCM). SMD single-points of these led to a  $DDG$  of 1.84 and 1.53 for the mono- and bi-solvated structures respectively (SMD//PCM). This leads to the same diastereomer prediction, validating that the SMD computation or explicit solvation does not change the predicted diastereomer for the cases where the PCM calculation agreed with experiment.

**Table S5** Selectivity of the different substrates. Diastereomeric ratios have been calculated from  $DDG_{298}$  between the most stable conformation of each diastereomer.

| Substrate                   | dr            | er <sub>major</sub> | er <sub>minor</sub> |
|-----------------------------|---------------|---------------------|---------------------|
| <b>9<sub>exp</sub></b>      | >95:5 (SS)    | 99:1 (SS:RR)        |                     |
| <b>9<sub>PCM/PCM</sub></b>  | 85:15 (SS:SR) | 89:11 (SS:RR)       | 90:10 (SR:RS)       |
| <b>9<sub>SMD/PCM</sub></b>  | 96:4 (SS:SR)  |                     |                     |
| <b>9<sub>SMD/SMD</sub></b>  | 86:14 (SS:SR) |                     |                     |
| <b>16<sub>exp</sub></b>     | 72:28 (SS)    | 94:6 (SS:RR)        | 98:2 (SR:RS)        |
| <b>16<sub>PCM/PCM</sub></b> | 66:34 (SR:SS) | 96:4 (SR:RS)        | 91:9 (SS:RR)        |
| <b>16<sub>SMD/PCM</sub></b> | 72:28 (SS:SR) |                     |                     |
| <b>16<sub>SMD/SMD</sub></b> | 55:45 (SS:SR) |                     |                     |
| <b>19<sub>exp</sub></b>     | >95:5 (SS)    | 98:2 (SS:RR)        |                     |
| <b>19<sub>PCM/PCM</sub></b> | 68:32 (SS:SR) | 88:12 (SS:RR)       | 91:9 (SR:RS)        |
| <b>19<sub>SMD/PCM</sub></b> | 87:13 (SS:SR) |                     |                     |
| <b>19<sub>SMD/SMD</sub></b> | 60:40 (SS:SR) |                     |                     |

### Computational Data

Raw data and cartesian coordinates obtained from geometry optimisation and frequency calculations and subsequent single-point energy calculations.

*Dispersion corrections using Grimme's D3 correction were evaluated at single-point; however, these have been subtracted from the computed single-point energies to avoid over estimation since the Minnesota functionals already account for dispersive interactions.*

PCMopt/16\_TS\_RRa

Frequencies, energies and thermodynamic properties:

Lowest Vibrational Mode (1/cm) = -134.8159  
 2nd Lowest Vibrational Mode (1/cm) = 22.9392  
 E(RM062X) (a.u.) = -2420.00511470



Thermal correction to Enthalpy (a.u.) = 0.632933  
Thermal correction to Gibbs Free Energy (a.u.) = 0.522632  
Total Entropy (cal/Kmol) = 232.148  
Esp(RM062X+D3) (a.u.) = -2422.42363995  
Esp(D3) (a.u.) = -0.0093925601  
Esp(RM062X) (a.u.) = -2422.4142473899

Optimised cartesian coordinates (Angstrom):

C 7.198590 -0.973448 -1.068923  
C 7.054820 -2.349886 -0.834155  
C 5.867711 -2.869355 -0.331958  
C 4.829851 -1.976178 -0.061422  
C 4.978147 -0.607238 -0.288682  
H 7.883826 -3.023030 -1.052657  
H 5.748294 -3.938067 -0.154037  
C 2.815190 -0.663735 0.486578  
C 1.413212 1.332731 0.912547  
C 2.776389 2.031772 1.057752  
C 3.721321 1.557240 -0.029535  
H 4.727295 1.963749 0.127235  
S 3.231500 -2.351207 0.541223  
N 3.817961 0.098960 0.049028  
N 1.615133 -0.142533 0.850178  
C 2.684124 3.573684 1.137183  
C 2.748190 4.279238 -0.221240  
C 3.782307 4.110799 2.057279  
H 1.715266 3.812881 1.604083  
H 3.754080 4.192919 -0.660792  
H 2.020329 3.887371 -0.944853  
H 2.544931 5.350715 -0.086635  
H 3.690083 3.701579 3.072989  
H 4.781183 3.850823 1.672827  
H 3.726740 5.206347 2.121331  
H 3.188063 1.676547 2.016441  
H 0.888153 1.525181 1.855721  
C 0.564361 1.822015 -0.240751  
C -0.358804 2.849650 -0.017073  
C 0.720322 1.309879 -1.531654

C -1.082609 3.389313 -1.078336  
H -0.512452 3.234563 0.994217  
C -0.003072 1.850891 -2.593992  
H 1.399746 0.474512 -1.719095  
C -0.897935 2.896905 -2.371288  
H -1.795846 4.193888 -0.893717  
H 0.126440 1.443589 -3.597623  
H -1.466201 3.316567 -3.202701  
C -0.750180 -0.434381 1.537150  
H -0.871753 0.637696 1.672337  
C -1.799469 -1.247452 1.718785  
C -3.061871 -0.694902 2.317907  
F -2.915181 -0.563779 3.646004  
F -3.355138 0.517774 1.845041  
F -4.113946 -1.481818 2.128164  
O 0.739900 -2.221746 1.126324  
C 0.543352 -1.028967 1.157868  
H 3.380410 1.838989 -1.036930  
C 6.166176 -0.082185 -0.803092  
H 6.283847 0.982164 -1.001772  
H 8.136762 -0.591934 -1.472000  
H -1.733966 -2.330289 1.591900  
C 0.365449 -2.315743 -2.006396  
H 0.576202 -2.014893 -3.042856  
H 1.252478 -2.113816 -1.390345  
H 0.150833 -3.389901 -1.962531  
C -1.851216 -2.248495 -1.100047  
O -0.729739 -1.566140 -1.528266  
O -1.814246 -3.457629 -0.926255  
C -4.293183 -1.747889 -0.643473  
C -2.941007 -1.350370 -0.905542  
O -4.797717 -2.853808 -0.426353  
C -4.263588 0.603196 -1.022452  
C -4.797489 1.886290 -1.120169  
C -5.093331 -0.473756 -0.697049  
C -6.165437 2.067543 -0.887796  
H -4.161992 2.738480 -1.372884

C -6.455360 -0.302938 -0.466116  
C -6.990607 0.983299 -0.562665  
H -6.596954 3.067740 -0.960545  
H -7.076925 -1.165190 -0.214458  
H -8.054695 1.150187 -0.385134  
C -2.846359 0.122560 -1.211990  
H -2.141348 0.665513 -0.552787  
H -2.493645 0.323910 -2.238721

-----

PCMopt/16\_TS\_RRb

Frequencies, energies and thermodynamic properties:

Lowest Vibrational Mode (1/cm) = -177.0764  
2nd Lowest Vibrational Mode (1/cm) = 14.1665  
E(RM062X) (a.u.) = -2420.01022521  
Thermal correction to Enthalpy (a.u.) = 0.632879  
Thermal correction to Gibbs Free Energy (a.u.) = 0.523964  
Total Entropy (cal/Kmol) = 229.230  
Esp(RM062X+D3) (a.u.) = -2422.42417039  
Esp(D3) (a.u.) = -0.0093167934  
Esp(RM062X) (a.u.) = -2422.4148535966

Optimised cartesian coordinates (Angstrom):

C 6.677099 -1.419908 -1.610143  
C 6.379164 -2.775728 -1.410642  
C 5.214096 -3.162637 -0.756186  
C 4.354535 -2.161251 -0.304712  
C 4.659250 -0.812987 -0.497108  
H 7.066986 -3.538558 -1.775686  
H 4.976119 -4.215399 -0.603019  
C 2.633532 -0.627127 0.578528  
C 1.475025 1.492234 0.995672  
C 2.900546 2.066852 1.091145  
C 3.767815 1.480387 -0.007333  
H 4.821377 1.745533 0.149189  
S 2.832464 -2.355781 0.541456  
N 3.670111 0.021376 0.034443  
N 1.554136 0.013277 1.058391  
C 2.951747 3.612312 1.131390

|   |           |           |           |
|---|-----------|-----------|-----------|
| C | 3.059223  | 4.279938  | -0.243395 |
| C | 4.104947  | 4.071461  | 2.026216  |
| H | 2.013368  | 3.948175  | 1.602135  |
| H | 4.048287  | 4.098564  | -0.692237 |
| H | 2.291045  | 3.934842  | -0.949179 |
| H | 2.949156  | 5.367627  | -0.131413 |
| H | 3.989897  | 3.695773  | 3.052563  |
| H | 5.071187  | 3.713197  | 1.637390  |
| H | 4.148881  | 5.168876  | 2.064614  |
| H | 3.297455  | 1.697777  | 2.050879  |
| H | 0.961001  | 1.803061  | 1.914002  |
| C | 0.683961  | 1.975067  | -0.202549 |
| C | -0.158062 | 3.083416  | -0.058186 |
| C | 0.816322  | 1.374941  | -1.457709 |
| C | -0.830883 | 3.608307  | -1.160074 |
| H | -0.290188 | 3.541245  | 0.925427  |
| C | 0.152724  | 1.907762  | -2.562671 |
| H | 1.411174  | 0.467607  | -1.578298 |
| C | -0.666771 | 3.027059  | -2.418528 |
| H | -1.485742 | 4.471805  | -1.034993 |
| H | 0.264194  | 1.433169  | -3.538613 |
| H | -1.190502 | 3.437076  | -3.283392 |
| C | -0.826554 | -0.079002 | 1.672800  |
| H | -0.908838 | 1.001320  | 1.589603  |
| C | -1.962054 | -0.830467 | 1.752955  |
| C | -3.223177 | -0.157177 | 2.211641  |
| F | -3.151051 | 0.098462  | 3.529150  |
| F | -3.421464 | 1.019104  | 1.609382  |
| F | -4.316659 | -0.896031 | 2.037749  |
| O | 0.630094  | -1.937455 | 1.792603  |
| C | 0.439782  | -0.763293 | 1.537839  |
| H | 3.464295  | 1.825275  | -1.007053 |
| C | 5.823627  | -0.418689 | -1.158591 |
| H | 6.056380  | 0.632163  | -1.326066 |
| H | 7.592810  | -1.140855 | -2.131645 |
| H | -1.918783 | -1.909640 | 1.914042  |
| C | -0.342475 | -4.116227 | -0.384774 |

|   |           |           |           |
|---|-----------|-----------|-----------|
| H | 0.137975  | -4.025695 | -1.368905 |
| H | 0.375941  | -3.815168 | 0.388589  |
| H | -0.666200 | -5.149585 | -0.219378 |
| C | -1.370193 | -2.019378 | -0.658344 |
| O | -1.508800 | -3.316210 | -0.311906 |
| O | -0.281107 | -1.555780 | -0.975647 |
| C | -3.932241 | -1.755691 | -0.514007 |
| C | -2.572901 | -1.237683 | -0.556018 |
| O | -4.357853 | -2.866665 | -0.217526 |
| C | -4.018764 | 0.493987  | -1.275582 |
| C | -4.626576 | 1.682521  | -1.675463 |
| C | -4.805910 | -0.604212 | -0.920741 |
| C | -6.023031 | 1.742404  | -1.717648 |
| H | -4.025869 | 2.552574  | -1.950747 |
| C | -6.196873 | -0.554682 | -0.961324 |
| C | -6.805447 | 0.634366  | -1.364965 |
| H | -6.513196 | 2.666657  | -2.029450 |
| H | -6.782500 | -1.431827 | -0.677891 |
| H | -7.893530 | 0.708197  | -1.405787 |
| C | -2.555976 | 0.151262  | -1.143616 |
| H | -2.005484 | 0.884239  | -0.525086 |
| H | -2.055011 | 0.168145  | -2.126729 |

-----

PCMopt/16\_TS\_RRc

Frequencies, energies and thermodynamic properties:

|                                                  |                  |
|--------------------------------------------------|------------------|
| Lowest Vibrational Mode (1/cm) =                 | -147.6723        |
| 2nd Lowest Vibrational Mode (1/cm) =             | 24.7359          |
| E(RM062X) (a.u.) =                               | -2420.01236128   |
| Thermal correction to Enthalpy (a.u.) =          | 0.633088         |
| Thermal correction to Gibbs Free Energy (a.u.) = | 0.525933         |
| Total Entropy (cal/Kmol) =                       | 225.526          |
| Esp(RM062X+D3) (a.u.) =                          | -2422.42560894   |
| Esp(D3) (a.u.) =                                 | -0.0093168478    |
| Esp(RM062X) (a.u.) =                             | -2422.4162920922 |

Optimised cartesian coordinates (Angstrom):

|   |          |          |          |
|---|----------|----------|----------|
| C | 5.953131 | 2.833875 | 0.846464 |
| C | 5.254555 | 4.033394 | 0.646423 |

|   |           |           |           |
|---|-----------|-----------|-----------|
| C | 3.947624  | 4.028193  | 0.169337  |
| C | 3.356499  | 2.794775  | -0.103578 |
| C | 4.058265  | 1.603793  | 0.088339  |
| H | 5.739385  | 4.983629  | 0.870671  |
| H | 3.398948  | 4.957641  | 0.015324  |
| C | 2.038859  | 0.777571  | -0.642931 |
| C | 1.497119  | -1.606047 | -0.823524 |
| C | 2.998479  | -1.750771 | -1.142132 |
| C | 3.808392  | -0.876560 | -0.201713 |
| H | 4.858681  | -0.838010 | -0.518422 |
| S | 1.739833  | 2.492132  | -0.710782 |
| N | 3.285031  | 0.488307  | -0.250322 |
| N | 1.132026  | -0.173302 | -0.921402 |
| C | 3.501178  | -3.213611 | -1.173686 |
| C | 4.028109  | -3.732553 | 0.168125  |
| C | 4.576648  | -3.369905 | -2.250907 |
| H | 2.643454  | -3.838661 | -1.469935 |
| H | 4.977631  | -3.241773 | 0.433141  |
| H | 3.319769  | -3.582953 | 0.994626  |
| H | 4.231077  | -4.809789 | 0.089941  |
| H | 4.188085  | -3.110302 | -3.245581 |
| H | 5.440500  | -2.719664 | -2.040958 |
| H | 4.941036  | -4.406205 | -2.283620 |
| H | 3.119992  | -1.337790 | -2.156846 |
| H | 0.959324  | -2.107576 | -1.638139 |
| C | 1.088513  | -2.225221 | 0.496109  |
| C | 0.647953  | -3.553607 | 0.511768  |
| C | 1.219559  | -1.534099 | 1.703583  |
| C | 0.398847  | -4.201595 | 1.720102  |
| H | 0.510156  | -4.091026 | -0.429772 |
| C | 0.961527  | -2.179512 | 2.912784  |
| H | 1.491683  | -0.476807 | 1.708720  |
| C | 0.566662  | -3.517471 | 2.925107  |
| H | 0.065288  | -5.240288 | 1.719757  |
| H | 1.066696  | -1.631583 | 3.850059  |
| H | 0.370556  | -4.021128 | 3.872784  |
| C | -1.229962 | -0.790058 | -1.291777 |

H -1.036702 -1.813609 -0.980633  
C -2.502930 -0.371907 -1.523112  
C -3.569664 -1.375754 -1.840306  
F -3.488722 -1.736781 -3.131943  
F -3.450757 -2.499024 -1.125693  
F -4.804465 -0.908313 -1.661777  
O -0.376679 1.387334 -1.610792  
C -0.199261 0.226541 -1.294137  
H 3.768679 -1.234618 0.837722  
C 5.367891 1.602205 0.571583  
H 5.913049 0.674046 0.738887  
H 6.974013 2.862520 1.227728  
H -2.693079 0.635145 -1.900316  
C -3.152208 -2.954173 1.959494  
H -3.691095 -3.500733 1.172979  
H -2.223667 -3.475432 2.214021  
H -3.802244 -2.885021 2.842955  
C -3.791391 -0.863539 1.135303  
O -2.774072 -1.668677 1.503159  
O -4.950945 -1.228724 1.232652  
C -2.116118 1.067715 0.894173  
C -3.377514 0.427866 0.626010  
O -1.024953 0.569042 1.189650  
C -3.669866 2.757527 0.301097  
C -4.104290 4.052879 0.021220  
C -2.338457 2.530584 0.658980  
C -3.192266 5.106218 0.128415  
H -5.139409 4.246352 -0.268450  
C -1.425651 3.576679 0.778650  
C -1.863195 4.872896 0.509724  
H -3.519635 6.126216 -0.081160  
H -0.395509 3.367904 1.072720  
H -1.171876 5.713376 0.593903  
C -4.434650 1.456824 0.299623  
H -4.926470 1.277380 -0.670880  
H -5.240675 1.465950 1.053061

-----

PCMopt/16\_TS\_RRd

Frequencies, energies and thermodynamic properties:

|                                                  |                  |
|--------------------------------------------------|------------------|
| Lowest Vibrational Mode (1/cm) =                 | -154.3214        |
| 2nd Lowest Vibrational Mode (1/cm) =             | 24.8761          |
| E(RM062X) (a.u.) =                               | -2420.01197583   |
| Thermal correction to Enthalpy (a.u.) =          | 0.633104         |
| Thermal correction to Gibbs Free Energy (a.u.) = | 0.526231         |
| Total Entropy (cal/Kmol) =                       | 224.933          |
| Esp(RM062X+D3) (a.u.) =                          | -2422.42447811   |
| Esp(D3) (a.u.) =                                 | -0.0091050739    |
| Esp(RM062X) (a.u.) =                             | -2422.4153730361 |

Optimised cartesian coordinates (Angstrom):

|   |          |           |           |
|---|----------|-----------|-----------|
| C | 6.114806 | 2.644814  | 0.829880  |
| C | 5.456824 | 3.863985  | 0.612218  |
| C | 4.150418 | 3.895564  | 0.134549  |
| C | 3.518305 | 2.678937  | -0.121220 |
| C | 4.180115 | 1.468140  | 0.087534  |
| H | 5.973092 | 4.800639  | 0.823023  |
| H | 3.633194 | 4.840593  | -0.033026 |
| C | 2.135352 | 0.698717  | -0.635912 |
| C | 1.513913 | -1.667090 | -0.776196 |
| C | 3.009810 | -1.871640 | -1.084742 |
| C | 3.847730 | -1.006545 | -0.160699 |
| H | 4.899080 | -1.009806 | -0.476350 |
| S | 1.892011 | 2.421704  | -0.724547 |
| N | 3.370860 | 0.374102  | -0.236655 |
| N | 1.199179 | -0.225350 | -0.905367 |
| C | 3.457793 | -3.352298 | -1.082163 |
| C | 3.950570 | -3.864010 | 0.275367  |
| C | 4.537231 | -3.570713 | -2.144526 |
| H | 2.579509 | -3.950030 | -1.375023 |
| H | 4.914836 | -3.403765 | 0.541885  |
| H | 3.239048 | -3.672099 | 1.090408  |
| H | 4.114106 | -4.949367 | 0.220055  |
| H | 4.169635 | -3.314152 | -3.147946 |
| H | 5.424183 | -2.951548 | -1.936801 |
| H | 4.860447 | -4.621035 | -2.154837 |



H 3.149589 -1.485826 -2.107801  
H 0.962873 -2.166561 -1.582909  
C 1.074178 -2.240097 0.554048  
C 0.570251 -3.544779 0.596256  
C 1.232234 -1.529051 1.746487  
C 0.274014 -4.149070 1.816710  
H 0.413829 -4.096729 -0.334023  
C 0.936580 -2.133167 2.967963  
H 1.557656 -0.487101 1.730318  
C 0.468739 -3.447016 3.006853  
H -0.113494 -5.168485 1.837286  
H 1.064946 -1.570450 3.893535  
H 0.238936 -3.917491 3.963871  
C -1.180144 -0.770258 -1.284216  
H -1.021596 -1.802925 -0.983972  
C -2.438862 -0.303706 -1.513038  
C -3.536114 -1.261913 -1.869133  
F -3.421123 -1.625618 -3.157747  
F -3.496519 -2.389395 -1.153645  
F -4.755457 -0.740746 -1.738458  
O -0.257184 1.377472 -1.607453  
C -0.118275 0.212344 -1.284559  
H 3.794587 -1.341746 0.885828  
C 5.488668 1.429649 0.572079  
H 6.002186 0.486148 0.753104  
H 7.136003 2.644703 1.211374  
H -2.586309 0.713210 -1.883270  
C -5.295960 -2.403813 1.503614  
H -5.029002 -2.574242 2.555942  
H -6.382500 -2.462047 1.379614  
H -4.804922 -3.171982 0.890200  
C -3.581242 -0.837962 1.150787  
O -4.910644 -1.109954 1.082303  
O -2.799639 -1.653569 1.597926  
C -2.010632 1.117498 0.896253  
C -3.273737 0.478257 0.631394  
O -0.927520 0.606515 1.196525

|   |           |          |           |
|---|-----------|----------|-----------|
| C | -3.559787 | 2.807845 | 0.306750  |
| C | -3.992856 | 4.103578 | 0.025890  |
| C | -2.225320 | 2.578698 | 0.652174  |
| C | -3.075617 | 5.153774 | 0.115967  |
| H | -5.030629 | 4.299425 | -0.252455 |
| C | -1.306243 | 3.621601 | 0.752164  |
| C | -1.742215 | 4.917600 | 0.480540  |
| H | -3.401694 | 6.173784 | -0.095511 |
| H | -0.272500 | 3.410635 | 1.032341  |
| H | -1.046499 | 5.755794 | 0.549261  |
| C | -4.333109 | 1.510979 | 0.316353  |
| H | -5.128064 | 1.532400 | 1.080843  |
| H | -4.839697 | 1.336534 | -0.646376 |

-----  
 PCMopt/16\_TS\_RRe

Frequencies, energies and thermodynamic properties:

|                                                  |                  |
|--------------------------------------------------|------------------|
| Lowest Vibrational Mode (1/cm) =                 | -140.3745        |
| 2nd Lowest Vibrational Mode (1/cm) =             | 11.4565          |
| E(RM062X) (a.u.) =                               | -2420.00249821   |
| Thermal correction to Enthalpy (a.u.) =          | 0.633203         |
| Thermal correction to Gibbs Free Energy (a.u.) = | 0.522342         |
| Total Entropy (cal/Kmol) =                       | 233.328          |
| Esp(RM062X+D3) (a.u.) =                          | -2422.41965777   |
| Esp(D3) (a.u.) =                                 | -0.0092556162    |
| Esp(RM062X) (a.u.) =                             | -2422.4104021538 |

Optimised cartesian coordinates (Angstrom):

|   |           |           |           |
|---|-----------|-----------|-----------|
| C | -6.615158 | -2.516625 | 0.465746  |
| C | -6.028770 | -3.764969 | 0.723406  |
| C | -4.657280 | -3.952870 | 0.590404  |
| C | -3.885621 | -2.859837 | 0.195655  |
| C | -4.473669 | -1.622265 | -0.068858 |
| H | -6.655473 | -4.600617 | 1.035033  |
| H | -4.196845 | -4.920363 | 0.790628  |
| C | -2.266661 | -1.118580 | -0.462268 |
| C | -1.442629 | 1.134235  | -0.965197 |
| C | -2.791866 | 1.296651  | -1.689035 |
| C | -3.906064 | 0.687496  | -0.858883 |

|   |           |           |           |
|---|-----------|-----------|-----------|
| H | -4.827854 | 0.605496  | -1.449423 |
| S | -2.155279 | -2.809331 | -0.069316 |
| N | -3.525016 | -0.669745 | -0.458920 |
| N | -1.212358 | -0.309710 | -0.705378 |
| C | -3.089256 | 2.751879  | -2.122315 |
| C | -3.826206 | 3.592979  | -1.075222 |
| C | -3.869683 | 2.753475  | -3.438517 |
| H | -2.112753 | 3.226780  | -2.314138 |
| H | -4.863408 | 3.245237  | -0.948784 |
| H | -3.335634 | 3.583149  | -0.091868 |
| H | -3.874836 | 4.636621  | -1.415829 |
| H | -3.307962 | 2.250605  | -4.238051 |
| H | -4.836426 | 2.238430  | -3.323640 |
| H | -4.078312 | 3.783278  | -3.760258 |
| H | -2.699847 | 0.691673  | -2.605768 |
| H | -0.676990 | 1.431474  | -1.690406 |
| C | -1.297894 | 1.980493  | 0.280942  |
| C | -0.591476 | 3.185587  | 0.197674  |
| C | -1.937089 | 1.646794  | 1.480289  |
| C | -0.564642 | 4.066562  | 1.277968  |
| H | -0.069188 | 3.444844  | -0.727005 |
| C | -1.921917 | 2.533717  | 2.555640  |
| H | -2.453433 | 0.690069  | 1.591754  |
| C | -1.245333 | 3.749052  | 2.453384  |
| H | -0.014110 | 5.004714  | 1.198021  |
| H | -2.434579 | 2.267955  | 3.481276  |
| H | -1.234431 | 4.441183  | 3.296539  |
| C | 1.208254  | 0.068898  | -0.880922 |
| H | 1.055592  | 1.110167  | -0.601991 |
| C | 2.423801  | -0.325739 | -1.334990 |
| C | 3.362116  | 0.738755  | -1.829878 |
| F | 2.996330  | 1.108364  | -3.071849 |
| F | 3.319486  | 1.840080  | -1.080336 |
| F | 4.625271  | 0.339677  | -1.918819 |
| O | 0.199666  | -2.085105 | -0.839117 |
| C | 0.102362  | -0.876488 | -0.798669 |
| H | -4.123188 | 1.272030  | 0.047028  |

|   |           |           |           |
|---|-----------|-----------|-----------|
| C | -5.849492 | -1.427093 | 0.065979  |
| H | -6.309569 | -0.458333 | -0.124831 |
| H | -7.692005 | -2.393837 | 0.582083  |
| H | 2.611131  | -1.341363 | -1.693333 |
| C | 6.901211  | -1.959300 | -1.360404 |
| H | 6.451465  | -1.884472 | -2.361424 |
| H | 7.848138  | -1.409393 | -1.336481 |
| H | 7.078844  | -3.020876 | -1.139232 |
| C | 4.825659  | -1.886145 | -0.280358 |
| O | 6.064935  | -1.363565 | -0.389377 |
| O | 4.520972  | -2.905477 | -0.888262 |
| C | 4.140796  | 0.130317  | 1.195309  |
| C | 3.927203  | -1.150637 | 0.570439  |
| O | 5.057719  | 0.947953  | 1.096223  |
| C | 2.090354  | -0.773140 | 1.998359  |
| C | 0.881545  | -0.775201 | 2.695668  |
| C | 2.913414  | 0.356469  | 2.028764  |
| C | 0.523367  | 0.364800  | 3.418787  |
| H | 0.225962  | -1.649545 | 2.676889  |
| C | 2.555839  | 1.501054  | 2.739572  |
| C | 1.350261  | 1.497390  | 3.440253  |
| H | -0.419450 | 0.380589  | 3.968463  |
| H | 3.216576  | 2.370780  | 2.737884  |
| H | 1.038656  | 2.378894  | 4.003637  |
| C | 2.729672  | -1.852379 | 1.164982  |
| H | 2.038579  | -2.268419 | 0.420432  |
| H | 3.030437  | -2.696830 | 1.813012  |

-----

PCMopt/16\_TS\_RRf

Frequencies, energies and thermodynamic properties:

|                                                  |                |
|--------------------------------------------------|----------------|
| Lowest Vibrational Mode (1/cm) =                 | -145.0859      |
| 2nd Lowest Vibrational Mode (1/cm) =             | 15.6463        |
| E(RM062X) (a.u.) =                               | -2420.00176969 |
| Thermal correction to Enthalpy (a.u.) =          | 0.633197       |
| Thermal correction to Gibbs Free Energy (a.u.) = | 0.522622       |
| Total Entropy (cal/Kmol) =                       | 232.725        |
| Esp(RM062X+D3) (a.u.) =                          | -2422.41913829 |

Esp(D3) (a.u.) = -0.0093082442  
Esp(RM062X) (a.u.) = -2422.4098300458

Optimised cartesian coordinates (Angstrom):

C 6.485593 2.632676 0.577297  
C 5.862241 3.856420 0.864140  
C 4.487256 4.010136 0.722885  
C 3.749906 2.907834 0.290429  
C 4.374672 1.694811 -0.002478  
H 6.462513 4.699820 1.205494  
H 3.998086 4.958264 0.946140  
C 2.186124 1.140430 -0.428523  
C 1.429444 -1.122470 -0.987961  
C 2.785735 -1.229140 -1.708991  
C 3.878617 -0.607891 -0.859425  
H 4.799627 -0.484081 -1.443959  
S 2.024104 2.816995 0.006058  
N 3.456577 0.727264 -0.427143  
N 1.156869 0.308340 -0.696516  
C 3.126754 -2.664953 -2.174161  
C 3.881763 -3.509350 -1.142725  
C 3.914338 -2.614032 -3.485090  
H 2.165129 -3.162642 -2.382896  
H 4.907309 -3.134120 -1.000823  
H 3.385092 -3.538334 -0.162842  
H 3.963629 -4.542352 -1.508474  
H 3.344854 -2.105519 -4.275513  
H 4.867327 -2.078363 -3.351143  
H 4.150519 -3.629986 -3.830926  
H 2.680061 -0.606129 -2.612055  
H 0.674709 -1.423914 -1.722981  
C 1.304637 -2.003445 0.236357  
C 0.629044 -3.223515 0.120287  
C 1.934203 -1.685616 1.445008  
C 0.624092 -4.133345 1.176684  
H 0.113310 -3.470645 -0.811402  
C 1.941130 -2.600945 2.496301  
H 2.425063 -0.719057 1.583231

C 1.296297 -3.830193 2.360716  
H 0.097559 -5.082694 1.071250  
H 2.445753 -2.346655 3.429571  
H 1.302687 -4.544632 3.185106  
C -1.247964 -0.138574 -0.881130  
H -1.063076 -1.170720 -0.587935  
C -2.472743 0.208100 -1.349410  
C -3.366181 -0.894954 -1.843609  
F -2.997488 -1.231602 -3.094882  
F -3.254854 -2.001723 -1.107828  
F -4.646758 -0.561449 -1.909935  
O -0.304051 2.045648 -0.825977  
C -0.172906 0.840217 -0.792756  
H 4.109806 -1.208193 0.032597  
C 5.754120 1.534118 0.139798  
H 6.242563 0.584170 -0.073768  
H 7.564342 2.536443 0.700757  
H -2.687338 1.211246 -1.725003  
C -5.511309 3.590746 -1.427092  
H -6.396536 3.834780 -0.823027  
H -4.999413 4.511310 -1.727389  
H -5.845200 3.040768 -2.318314  
C -5.035286 1.639611 -0.191710  
O -4.578877 2.833277 -0.681767  
O -6.171832 1.276646 -0.426757  
C -4.159955 -0.334855 1.162890  
C -4.009111 0.965545 0.563543  
O -5.048304 -1.181948 1.050982  
C -2.149627 0.639163 1.975742  
C -0.938205 0.681581 2.667808  
C -2.922043 -0.525818 1.987788  
C -0.528257 -0.453512 3.370416  
H -0.321023 1.583679 2.661356  
C -2.512250 -1.665483 2.678368  
C -1.305959 -1.620711 3.376184  
H 0.416837 -0.437994 3.916327  
H -3.133923 -2.563500 2.664935

H -0.954577 -2.497029 3.923953  
C -2.838269 1.707197 1.166759  
H -2.165621 2.164725 0.429470  
H -3.168855 2.525493 1.832858

-----  
PCMopt/16\_TS\_RSa

Frequencies, energies and thermodynamic properties:

Lowest Vibrational Mode (1/cm) = -100.3245  
2nd Lowest Vibrational Mode (1/cm) = 11.5728  
E(RM062X) (a.u.) = -2420.00645894  
Thermal correction to Enthalpy (a.u.) = 0.632965  
Thermal correction to Gibbs Free Energy (a.u.) = 0.522515  
Total Entropy (cal/Kmol) = 232.462  
Esp(RM062X+D3) (a.u.) = -2422.42341849  
Esp(D3) (a.u.) = -0.0094799054  
Esp(RM062X) (a.u.) = -2422.4139385846

Optimised cartesian coordinates (Angstrom):

C -6.531233 -2.188567 -0.129982  
C -5.983560 -3.464042 -0.336507  
C -4.627198 -3.627232 -0.595023  
C -3.830161 -2.482696 -0.641868  
C -4.380346 -1.215541 -0.444409  
H -6.629064 -4.341216 -0.291164  
H -4.196502 -4.615847 -0.753992  
C -2.172715 -0.661963 -0.759486  
C -1.289071 1.621264 -0.586568  
C -2.669493 2.029173 -1.130669  
C -3.757976 1.211632 -0.461087  
H -4.715373 1.343193 -0.981644  
S -2.109894 -2.388215 -0.951407  
N -3.412059 -0.210151 -0.542071  
N -1.101626 0.162631 -0.795469  
C -2.930058 3.552944 -1.066135  
C -3.568464 4.037139 0.239329  
C -3.784281 3.986633 -2.259224  
H -1.947387 4.043237 -1.166059  
H -4.607916 3.683810 0.325185

|   |           |           |           |
|---|-----------|-----------|-----------|
| H | -3.017921 | 3.712668  | 1.133235  |
| H | -3.599143 | 5.135582  | 0.243756  |
| H | -3.293370 | 3.745622  | -3.212437 |
| H | -4.765585 | 3.486999  | -2.243597 |
| H | -3.963414 | 5.070394  | -2.229287 |
| H | -2.655045 | 1.742275  | -2.194750 |
| H | -0.559533 | 2.112381  | -1.239576 |
| C | -1.028246 | 2.033084  | 0.845908  |
| C | -0.249352 | 3.168124  | 1.095320  |
| C | -1.614051 | 1.358716  | 1.922648  |
| C | -0.084935 | 3.642112  | 2.396436  |
| H | 0.224986  | 3.695444  | 0.263440  |
| C | -1.460388 | 1.838365  | 3.222400  |
| H | -2.186488 | 0.442329  | 1.761646  |
| C | -0.700780 | 2.984127  | 3.461475  |
| H | 0.523372  | 4.529171  | 2.576873  |
| H | -1.928373 | 1.307980  | 4.053187  |
| H | -0.579954 | 3.357445  | 4.479208  |
| C | 1.334232  | 0.523646  | -1.010598 |
| H | 1.245539  | 1.512842  | -0.566270 |
| C | 2.520576  | 0.107482  | -1.507522 |
| C | 3.592031  | 1.136669  | -1.741441 |
| F | 3.243943  | 1.922966  | -2.774009 |
| F | 3.766579  | 1.944851  | -0.695452 |
| F | 4.770062  | 0.606156  | -2.059355 |
| O | 0.259186  | -1.531554 | -1.466054 |
| C | 0.186683  | -0.378212 | -1.106305 |
| H | -3.897095 | 1.481100  | 0.595881  |
| C | -5.741014 | -1.045904 | -0.180473 |
| H | -6.170880 | -0.059580 | -0.009970 |
| H | -7.596716 | -2.087918 | 0.076961  |
| H | 2.628923  | -0.849697 | -2.021100 |
| C | 7.089224  | 0.435996  | 0.164929  |
| H | 7.141633  | 0.566785  | -0.925505 |
| H | 7.387295  | 1.363428  | 0.666369  |
| H | 7.772492  | -0.377205 | 0.448369  |
| C | 5.201092  | -0.961168 | 0.040508  |



O 5.765839 0.162412 0.572917  
 O 5.854884 -1.694059 -0.680833  
 C 3.046734 -2.283097 0.177286  
 C 3.829126 -1.104031 0.446552  
 O 3.231246 -3.210748 -0.614985  
 C 1.918483 -1.010196 1.832317  
 C 0.886044 -0.689131 2.713678  
 C 1.849646 -2.181373 1.075129  
 C -0.195039 -1.566129 2.830398  
 H 0.915925 0.232664 3.299616  
 C 0.775913 -3.062104 1.187511  
 C -0.250473 -2.747888 2.076639  
 H -1.009622 -1.329511 3.518535  
 H 0.745089 -3.963361 0.571301  
 H -1.108279 -3.414911 2.183420  
 C 3.197183 -0.268978 1.533856  
 H 2.984994 0.770148 1.227687  
 H 3.828238 -0.199464 2.436829

-----  
 PCMopt/16\_TS\_RSb

Frequencies, energies and thermodynamic properties:

Lowest Vibrational Mode (1/cm) = -119.9487  
 2nd Lowest Vibrational Mode (1/cm) = 18.2077  
 E(RM062X) (a.u.) = -2420.00581683  
 Thermal correction to Enthalpy (a.u.) = 0.632871  
 Thermal correction to Gibbs Free Energy (a.u.) = 0.523181  
 Total Entropy (cal/Kmol) = 230.860  
 Esp(RM062X+D3) (a.u.) = -2422.42269554  
 Esp(D3) (a.u.) = -0.0097405822  
 Esp(RM062X) (a.u.) = -2422.4129549578

Optimised cartesian coordinates (Angstrom):

C -6.020622 -2.320021 0.317008  
 C -5.412603 -3.524564 -0.068649  
 C -4.117063 -3.542005 -0.573922  
 C -3.443543 -2.324889 -0.683853  
 C -4.052821 -1.128606 -0.300556  
 H -5.961613 -4.461005 0.030976

|   |           |           |           |
|---|-----------|-----------|-----------|
| H | -3.638158 | -4.474720 | -0.873239 |
| C | -1.986154 | -0.361472 | -0.938860 |
| C | -1.235082 | 1.962191  | -0.682664 |
| C | -2.711615 | 2.301842  | -0.954211 |
| C | -3.614918 | 1.341112  | -0.200984 |
| H | -4.654881 | 1.444818  | -0.536837 |
| S | -1.819662 | -2.053919 | -1.275148 |
| N | -3.200456 | -0.034770 | -0.483222 |
| N | -0.994669 | 0.547203  | -1.058896 |
| C | -3.060078 | 3.786402  | -0.691923 |
| C | -3.508598 | 4.092508  | 0.740520  |
| C | -4.125269 | 4.255673  | -1.685029 |
| H | -2.142701 | 4.364392  | -0.892221 |
| H | -4.499031 | 3.656980  | 0.945214  |
| H | -2.805099 | 3.722973  | 1.499419  |
| H | -3.600685 | 5.179936  | 0.869122  |
| H | -3.780202 | 4.149110  | -2.722942 |
| H | -5.053341 | 3.673632  | -1.571344 |
| H | -4.372914 | 5.312211  | -1.511851 |
| H | -2.858882 | 2.113020  | -2.030071 |
| H | -0.648122 | 2.563313  | -1.388177 |
| C | -0.767059 | 2.256574  | 0.727415  |
| C | -0.063722 | 3.437922  | 0.983524  |
| C | -1.059991 | 1.393084  | 1.787637  |
| C | 0.323121  | 3.762548  | 2.283030  |
| H | 0.186352  | 4.110742  | 0.159120  |
| C | -0.675436 | 1.717789  | 3.088051  |
| H | -1.578326 | 0.448432  | 1.606906  |
| C | 0.013091  | 2.905018  | 3.338898  |
| H | 0.872610  | 4.685968  | 2.469584  |
| H | -0.912813 | 1.039856  | 3.909558  |
| H | 0.315462  | 3.156987  | 4.356066  |
| C | 1.422804  | 1.003354  | -1.257346 |
| H | 1.297020  | 1.988889  | -0.816824 |
| C | 2.665648  | 0.519258  | -1.496288 |
| C | 3.807923  | 1.492836  | -1.430211 |
| F | 3.808418  | 2.276928  | -2.520448 |

|   |           |           |           |
|---|-----------|-----------|-----------|
| F | 3.716450  | 2.304631  | -0.376267 |
| F | 5.000766  | 0.902314  | -1.394371 |
| O | 0.417252  | -1.016009 | -1.923092 |
| C | 0.302134  | 0.102857  | -1.466846 |
| H | -3.583017 | 1.502179  | 0.886545  |
| C | -5.352839 | -1.105166 | 0.208473  |
| H | -5.826921 | -0.175234 | 0.520293  |
| H | -7.035600 | -2.333349 | 0.714464  |
| H | 2.845028  | -0.423868 | -2.015311 |
| C | 6.744818  | -0.909156 | 0.334130  |
| H | 7.030984  | -1.025295 | 1.389140  |
| H | 7.372094  | -1.550960 | -0.294221 |
| H | 6.883780  | 0.143533  | 0.051044  |
| C | 4.467217  | -0.618397 | 0.794781  |
| O | 5.409546  | -1.315373 | 0.116845  |
| O | 4.788650  | 0.255131  | 1.587182  |
| C | 2.735422  | -2.246760 | -0.172858 |
| C | 3.114236  | -1.032610 | 0.522638  |
| O | 3.300866  | -2.863268 | -1.074427 |
| C | 1.011940  | -1.730978 | 1.378758  |
| C | -0.153370 | -1.958064 | 2.111976  |
| C | 1.430303  | -2.675896 | 0.438279  |
| C | -0.865242 | -3.145670 | 1.905407  |
| H | -0.485228 | -1.246108 | 2.870272  |
| C | 0.724955  | -3.856274 | 0.219576  |
| C | -0.428053 | -4.092365 | 0.971042  |
| H | -1.766126 | -3.342082 | 2.490160  |
| H | 1.086129  | -4.578212 | -0.516087 |
| H | -0.995047 | -5.015167 | 0.832012  |
| C | 2.022125  | -0.606527 | 1.464822  |
| H | 1.554176  | 0.356748  | 1.168098  |
| H | 2.384379  | -0.460040 | 2.495435  |

-----  
 PCMopt/16\_TS\_RSc

Frequencies, energies and thermodynamic properties:

|                                      |           |
|--------------------------------------|-----------|
| Lowest Vibrational Mode (1/cm) =     | -137.3030 |
| 2nd Lowest Vibrational Mode (1/cm) = | 16.4839   |

E(RM062X) (a.u.) = -2420.00890798  
Thermal correction to Enthalpy (a.u.) = 0.633346  
Thermal correction to Gibbs Free Energy (a.u.) = 0.525263  
Total Entropy (cal/Kmol) = 227.482  
Esp(RM062X+D3) (a.u.) = -2422.42303914  
Esp(D3) (a.u.) = -0.0087687558  
Esp(RM062X) (a.u.) = -2422.4142703842

Optimised cartesian coordinates (Angstrom):

C 6.846428 -1.963745 -1.039296  
C 6.401518 -3.280099 -0.847177  
C 5.127098 -3.539138 -0.353707  
C 4.308570 -2.449391 -0.056430  
C 4.758485 -1.141344 -0.239171  
H 7.061115 -4.113067 -1.090789  
H 4.774897 -4.560171 -0.205677  
C 2.628766 -0.737384 0.532959  
C 1.637797 1.494495 0.756139  
C 3.086663 1.921514 1.061475  
C 4.035407 1.236793 0.095818  
H 5.078026 1.395993 0.399387  
S 2.675767 -2.476791 0.577929  
N 3.785981 -0.204301 0.126810  
N 1.553676 0.015398 0.834895  
C 3.297936 3.453114 1.115650  
C 3.688862 4.087170 -0.223385  
C 4.343652 3.795136 2.179193  
H 2.341879 3.895431 1.438807  
H 4.711144 3.796719 -0.511719  
H 3.008822 3.815727 -1.042644  
H 3.678418 5.181836 -0.126832  
H 4.031566 3.447787 3.174031  
H 5.312732 3.328362 1.942345  
H 4.501347 4.881615 2.228081  
H 3.299952 1.522850 2.066784  
H 1.026994 1.873213 1.584705  
C 1.096017 2.034783 -0.549561  
C 0.415567 3.257736 -0.545422

C 1.321887 1.382744 -1.765191  
C 0.009106 3.844020 -1.742237  
H 0.205213 3.759564 0.402165  
C 0.914236 1.969244 -2.963540  
H 1.800967 0.401256 -1.788375  
C 0.268402 3.205395 -2.955606  
H -0.516047 4.799870 -1.726328  
H 1.098293 1.453412 -3.906738  
H -0.048281 3.662845 -3.893840  
C -0.861977 0.177548 1.317399  
H -0.872714 1.226425 1.031097  
C -2.018202 -0.447691 1.657019  
C -3.191796 0.360810 2.121257  
F -3.010279 0.720317 3.404487  
F -3.356362 1.489660 1.431826  
F -4.341292 -0.313492 2.086470  
O 0.397557 -1.811536 1.545589  
C 0.338498 -0.634435 1.246778  
H 3.911094 1.595691 -0.936585  
C 6.034485 -0.875207 -0.739397  
H 6.383121 0.144057 -0.901284  
H 7.846843 -1.786056 -1.434163  
H -2.008512 -1.486667 1.992979  
C -0.595903 -3.981462 -0.690084  
H 0.188504 -3.653626 0.004029  
H -0.834169 -5.036911 -0.517740  
H -0.235730 -3.842752 -1.719416  
C -1.749662 -1.925283 -0.748357  
O -1.788863 -3.257413 -0.464729  
O -0.722762 -1.398965 -1.149657  
C -3.345692 0.017295 -1.007404  
C -3.009782 -1.289984 -0.483509  
O -2.622412 0.913896 -1.433393  
C -5.373177 -1.097765 -0.475240  
C -6.752265 -1.235818 -0.329369  
C -4.841335 0.106799 -0.940695  
C -7.575717 -0.156054 -0.662496

H -7.187102 -2.168073 0.037645  
 C -5.653207 1.188279 -1.273381  
 C -7.033935 1.048638 -1.131131  
 H -8.657919 -0.251399 -0.555702  
 H -5.203721 2.116391 -1.632901  
 H -7.698815 1.876875 -1.382332  
 C -4.265404 -2.083263 -0.189474  
 H -4.349958 -2.971336 -0.838426  
 H -4.322577 -2.451795 0.848510

-----

PCMopt/16\_TS\_RSd

Frequencies, energies and thermodynamic properties:

Lowest Vibrational Mode (1/cm) = -143.2623  
 2nd Lowest Vibrational Mode (1/cm) = 23.3705  
 E(RM062X) (a.u.) = -2420.00565045  
 Thermal correction to Enthalpy (a.u.) = 0.632936  
 Thermal correction to Gibbs Free Energy (a.u.) = 0.523535  
 Total Entropy (cal/Kmol) = 230.255  
 Esp(RM062X+D3) (a.u.) = -2422.42178984  
 Esp(D3) (a.u.) = -0.0098076255  
 Esp(RM062X) (a.u.) = -2422.4119822145

Optimised cartesian coordinates (Angstrom):

C -6.134969 -1.962717 0.447607  
 C -5.617777 -3.208937 0.062277  
 C -4.338105 -3.318257 -0.471524  
 C -3.587177 -2.150400 -0.610078  
 C -4.106725 -0.912281 -0.227502  
 H -6.225642 -4.105454 0.184692  
 H -3.930070 -4.284048 -0.770984  
 C -2.008220 -0.290682 -0.918610  
 C -1.099999 1.979162 -0.704521  
 C -2.555807 2.414503 -0.949226  
 C -3.504790 1.523720 -0.166648  
 H -4.542566 1.692706 -0.482473  
 S -1.961888 -1.994279 -1.238873  
 N -3.188506 0.120586 -0.441564  
 N -0.962398 0.548028 -1.069340

|   |           |           |           |
|---|-----------|-----------|-----------|
| C | -2.798784 | 3.921636  | -0.696989 |
| C | -3.190414 | 4.272246  | 0.741987  |
| C | -3.854669 | 4.450117  | -1.670170 |
| H | -1.850359 | 4.435181  | -0.926385 |
| H | -4.202019 | 3.905564  | 0.975803  |
| H | -2.494209 | 3.865089  | 1.488342  |
| H | -3.207295 | 5.364734  | 0.859235  |
| H | -3.543483 | 4.308484  | -2.714575 |
| H | -4.816633 | 3.933427  | -1.526541 |
| H | -4.026455 | 5.522902  | -1.505156 |
| H | -2.738057 | 2.225082  | -2.019647 |
| H | -0.489208 | 2.531744  | -1.429186 |
| C | -0.582231 | 2.255465  | 0.691946  |
| C | 0.205229  | 3.388683  | 0.919727  |
| C | -0.907980 | 1.423739  | 1.767785  |
| C | 0.644043  | 3.697782  | 2.206367  |
| H | 0.481424  | 4.035604  | 0.083072  |
| C | -0.471179 | 1.732914  | 3.055550  |
| H | -1.494639 | 0.515773  | 1.609172  |
| C | 0.302338  | 2.872501  | 3.278034  |
| H | 1.259015  | 4.583442  | 2.370399  |
| H | -0.734488 | 1.080024  | 3.889352  |
| H | 0.645482  | 3.112107  | 4.285205  |
| C | 1.472933  | 0.842030  | -1.318436 |
| H | 1.420901  | 1.833382  | -0.876956 |
| C | 2.680764  | 0.281291  | -1.583570 |
| C | 3.871203  | 1.199001  | -1.566107 |
| F | 3.886125  | 1.947523  | -2.681712 |
| F | 3.840221  | 2.048995  | -0.537756 |
| F | 5.036436  | 0.557783  | -1.531659 |
| O | 0.327447  | -1.113843 | -1.944432 |
| C | 0.295846  | 0.015385  | -1.497876 |
| H | -3.439245 | 1.693560  | 0.918104  |
| C | -5.390053 | -0.796516 | 0.309846  |
| H | -5.793390 | 0.166349  | 0.621233  |
| H | -7.139148 | -1.904004 | 0.867742  |
| H | 2.789666  | -0.659943 | -2.124475 |

|   |           |           |           |
|---|-----------|-----------|-----------|
| C | 6.081527  | 0.374908  | 1.497403  |
| H | 6.540845  | 0.620333  | 0.529516  |
| H | 6.096705  | 1.253516  | 2.151543  |
| H | 6.654125  | -0.442868 | 1.957310  |
| C | 4.484497  | -1.058078 | 0.531316  |
| O | 4.724186  | 0.020824  | 1.329226  |
| O | 5.407543  | -1.694075 | 0.057095  |
| C | 2.585231  | -2.502486 | -0.270845 |
| C | 3.070489  | -1.301131 | 0.379205  |
| O | 3.091001  | -3.172889 | -1.168136 |
| C | 0.958595  | -1.841740 | 1.324057  |
| C | -0.195356 | -1.973676 | 2.097908  |
| C | 1.275705  | -2.829022 | 0.387511  |
| C | -0.997439 | -3.109197 | 1.933412  |
| H | -0.450724 | -1.228326 | 2.853670  |
| C | 0.481450  | -3.958671 | 0.211516  |
| C | -0.660525 | -4.099254 | 1.002322  |
| H | -1.891186 | -3.230444 | 2.548747  |
| H | 0.765960  | -4.715064 | -0.523145 |
| H | -1.297071 | -4.980153 | 0.896962  |
| C | 2.048928  | -0.789554 | 1.360562  |
| H | 2.453418  | -0.666666 | 2.377975  |
| H | 1.638947  | 0.202378  | 1.074433  |

-----  
 PCMopt/16\_TS\_RSe

Frequencies, energies and thermodynamic properties:

|                                                  |                  |
|--------------------------------------------------|------------------|
| Lowest Vibrational Mode (1/cm) =                 | -162.4163        |
| 2nd Lowest Vibrational Mode (1/cm) =             | 17.8621          |
| E(RM062X) (a.u.) =                               | -2420.00531249   |
| Thermal correction to Enthalpy (a.u.) =          | 0.633087         |
| Thermal correction to Gibbs Free Energy (a.u.) = | 0.523779         |
| Total Entropy (cal/Kmol) =                       | 230.059          |
| Esp(RM062X+D3) (a.u.) =                          | -2422.42138536   |
| Esp(D3) (a.u.) =                                 | -0.0095639577    |
| Esp(RM062X) (a.u.) =                             | -2422.4118214023 |

Optimised cartesian coordinates (Angstrom):

|   |          |          |          |
|---|----------|----------|----------|
| C | 6.738340 | 1.554640 | 0.400727 |
|---|----------|----------|----------|



|   |           |           |           |
|---|-----------|-----------|-----------|
| C | 6.354453  | 2.870751  | 0.103186  |
| C | 5.061768  | 3.159674  | -0.320598 |
| C | 4.162180  | 2.100058  | -0.443622 |
| C | 4.550503  | 0.791569  | -0.154085 |
| H | 7.077257  | 3.679916  | 0.208410  |
| H | 4.757671  | 4.181600  | -0.548087 |
| C | 2.348685  | 0.450768  | -0.729333 |
| C | 1.222026  | -1.725009 | -0.654965 |
| C | 2.618729  | -2.295297 | -0.946571 |
| C | 3.669045  | -1.553892 | -0.142506 |
| H | 4.676473  | -1.818842 | -0.487686 |
| S | 2.481805  | 2.174110  | -0.933571 |
| N | 3.500696  | -0.113573 | -0.345575 |
| N | 1.219726  | -0.263769 | -0.908225 |
| C | 2.696187  | -3.830792 | -0.778038 |
| C | 3.044168  | -4.299711 | 0.638114  |
| C | 3.689310  | -4.417915 | -1.782841 |
| H | 1.696755  | -4.223135 | -1.030057 |
| H | 4.087696  | -4.054666 | 0.890239  |
| H | 2.391287  | -3.864064 | 1.406987  |
| H | 2.946209  | -5.392791 | 0.694302  |
| H | 3.398228  | -4.185954 | -2.816825 |
| H | 4.701859  | -4.018712 | -1.614533 |
| H | 3.742055  | -5.510468 | -1.677364 |
| H | 2.806097  | -2.069660 | -2.009050 |
| H | 0.566162  | -2.164687 | -1.413967 |
| C | 0.662090  | -2.031685 | 0.718088  |
| C | -0.286065 | -3.048438 | 0.862384  |
| C | 1.075139  | -1.317958 | 1.848339  |
| C | -0.809849 | -3.354007 | 2.117933  |
| H | -0.626947 | -3.601585 | -0.016710 |
| C | 0.555647  | -1.624832 | 3.105085  |
| H | 1.796220  | -0.501792 | 1.758377  |
| C | -0.387476 | -2.644162 | 3.242043  |
| H | -1.556718 | -4.142682 | 2.215909  |
| H | 0.883215  | -1.059189 | 3.978526  |
| H | -0.800054 | -2.878289 | 4.224223  |

C -1.217011 -0.362245 -1.316127  
H -1.222178 -1.440369 -1.183170  
C -2.399806 0.290091 -1.513752  
C -3.571531 -0.447538 -2.088866  
F -3.321976 -0.766795 -3.372822  
F -3.825191 -1.602309 -1.463155  
F -4.682818 0.276956 -2.093634  
O 0.070775 1.613652 -1.485758  
C -0.001441 0.422500 -1.252000  
H 3.602784 -1.767995 0.934576  
C 5.844859 0.496156 0.278538  
H 6.147872 -0.521545 0.521182  
H 7.755411 1.353785 0.737710  
H -2.393907 1.359145 -1.735513  
C -6.623290 -1.031415 0.485648  
H -6.830297 -1.324445 1.524301  
H -7.524123 -0.606855 0.030170  
H -6.306109 -1.924638 -0.071560  
C -4.422650 -0.365970 0.914093  
O -5.629770 -0.027130 0.422991  
O -4.248371 -1.433972 1.478284  
C -3.556169 2.021469 0.352846  
C -3.384659 0.626205 0.716078  
O -4.495032 2.612898 -0.170220  
C -1.419287 1.767029 1.366298  
C -0.151916 2.165454 1.786544  
C -2.251897 2.678062 0.711371  
C 0.260720 3.475535 1.526888  
H 0.509333 1.472332 2.311267  
C -1.853415 3.987065 0.457538  
C -0.579154 4.381491 0.866911  
H 1.254743 3.798704 1.842761  
H -2.529916 4.674429 -0.054938  
H -0.231756 5.398586 0.677060  
C -2.112317 0.433814 1.489554  
H -1.487826 -0.386236 1.087403  
H -2.305765 0.172701 2.544502

-----  
PCMopt/16\_TS\_RSf

Frequencies, energies and thermodynamic properties:

|                                                  |                  |
|--------------------------------------------------|------------------|
| Lowest Vibrational Mode (1/cm) =                 | -230.2568        |
| 2nd Lowest Vibrational Mode (1/cm) =             | 15.2805          |
| E(RM062X) (a.u.) =                               | -2420.00465567   |
| Thermal correction to Enthalpy (a.u.) =          | 0.633427         |
| Thermal correction to Gibbs Free Energy (a.u.) = | 0.524505         |
| Total Entropy (cal/Kmol) =                       | 229.247          |
| Esp(RM062X+D3) (a.u.) =                          | -2422.41815470   |
| Esp(D3) (a.u.) =                                 | -0.0090710052    |
| Esp(RM062X) (a.u.) =                             | -2422.4090836948 |

Optimised cartesian coordinates (Angstrom):

|   |          |           |           |
|---|----------|-----------|-----------|
| C | 6.637704 | -1.546008 | -1.463878 |
| C | 6.214245 | -2.867139 | -1.665435 |
| C | 4.940379 | -3.275898 | -1.281118 |
| C | 4.099648 | -2.331681 | -0.693154 |
| C | 4.529205 | -1.020261 | -0.485452 |
| H | 6.889344 | -3.584791 | -2.131877 |
| H | 4.605740 | -4.301783 | -1.437195 |
| C | 2.385154 | -0.883556 | 0.344708  |
| C | 1.335999 | 1.185701  | 1.097858  |
| C | 2.759178 | 1.557159  | 1.562925  |
| C | 3.772007 | 1.151509  | 0.507654  |
| H | 4.792546 | 1.216662  | 0.907725  |
| S | 2.463686 | -2.568448 | -0.103444 |
| N | 3.540369 | -0.240928 | 0.124633  |
| N | 1.294799 | -0.265528 | 0.816827  |
| C | 2.912511 | 3.033106  | 2.001016  |
| C | 3.328033 | 3.991632  | 0.880110  |
| C | 3.902322 | 3.131151  | 3.163911  |
| H | 1.927112 | 3.354821  | 2.376004  |
| H | 4.369109 | 3.808268  | 0.571689  |
| H | 2.686509 | 3.918257  | -0.009279 |
| H | 3.276686 | 5.026378  | 1.246925  |
| H | 3.567291 | 2.537794  | 4.026174  |
| H | 4.897774 | 2.767073  | 2.864395  |

|   |           |           |           |
|---|-----------|-----------|-----------|
| H | 4.014100  | 4.175413  | 3.487743  |
| H | 2.942144  | 0.928530  | 2.449569  |
| H | 0.682636  | 1.341073  | 1.964237  |
| C | 0.840695  | 2.031922  | -0.056343 |
| C | 0.071519  | 3.167255  | 0.220689  |
| C | 1.243736  | 1.789609  | -1.374438 |
| C | -0.232100 | 4.082417  | -0.787105 |
| H | -0.274731 | 3.350657  | 1.241016  |
| C | 0.948072  | 2.707848  | -2.381272 |
| H | 1.796703  | 0.882311  | -1.628287 |
| C | 0.225921  | 3.865895  | -2.086404 |
| H | -0.824890 | 4.968050  | -0.554174 |
| H | 1.281568  | 2.515493  | -3.401905 |
| H | -0.000171 | 4.585283  | -2.874897 |
| C | -1.101318 | -0.326914 | 1.359340  |
| H | -1.146888 | 0.756329  | 1.269693  |
| C | -2.265340 | -1.049358 | 1.533583  |
| C | -3.401506 | -0.407423 | 2.268195  |
| F | -3.052544 | -0.119263 | 3.533124  |
| F | -3.792874 | 0.745202  | 1.716210  |
| F | -4.469600 | -1.206313 | 2.355305  |
| O | 0.233840  | -2.262618 | 1.087635  |
| C | 0.099832  | -1.050850 | 1.087343  |
| H | 3.710933  | 1.779790  | -0.392970 |
| C | 5.803672  | -0.602703 | -0.871382 |
| H | 6.135605  | 0.424552  | -0.724827 |
| H | 7.637944  | -1.247050 | -1.777894 |
| H | -2.163505 | -2.118325 | 1.733083  |
| C | -1.767197 | -4.685369 | -0.335806 |
| H | -2.380313 | -5.299131 | -1.010244 |
| H | -0.703977 | -4.872263 | -0.517342 |
| H | -2.021315 | -4.946842 | 0.701378  |
| C | -3.210105 | -2.841014 | -0.344747 |
| O | -1.974682 | -3.306229 | -0.570027 |
| O | -4.130520 | -3.581048 | -0.052076 |
| C | -2.387590 | -0.539329 | -1.174274 |
| C | -3.320723 | -1.388565 | -0.444942 |

O -1.185148 -0.683007 -1.367935  
 C -4.497311 0.533430 -1.214910  
 C -5.392655 1.571551 -1.465427  
 C -3.151550 0.684853 -1.552034  
 C -4.911722 2.745195 -2.054966  
 H -6.449121 1.477782 -1.205622  
 C -2.661930 1.847698 -2.139755  
 C -3.557701 2.887160 -2.389291  
 H -5.601970 3.566721 -2.255696  
 H -1.599921 1.928503 -2.378207  
 H -3.206317 3.816713 -2.841513  
 C -4.724706 -0.819493 -0.590016  
 H -5.327781 -1.461841 -1.255046  
 H -5.289019 -0.744658 0.348588

-----  
 PCMopt/16\_TS\_SRa

Frequencies, energies and thermodynamic properties:

Lowest Vibrational Mode (1/cm) = -149.7240  
 2nd Lowest Vibrational Mode (1/cm) = 18.2337  
 E(RM062X) (a.u.) = -2420.01167034  
 Thermal correction to Enthalpy (a.u.) = 0.633051  
 Thermal correction to Gibbs Free Energy (a.u.) = 0.523822  
 Total Entropy (cal/Kmol) = 229.891  
 Esp(RM062X+D3) (a.u.) = -2422.42779951  
 Esp(D3) (a.u.) = -0.0095449338  
 Esp(RM062X) (a.u.) = -2422.4182545762  
 Esp(RM062X+D3) a=1.00 (a.u.) = -2422.44017264  
 Esp(RM062X) a=1.00 (a.u.) = -2422.4306277062  
 Esp(RM062X+D3) a=1.05 (a.u.) = -2422.43350095  
 Esp(RM062X) a=1.05 (a.u.) = -2422.4239560162  
 Esp(RM062X+D3) a=1.10 (a.u.) = -2422.42779951  
 Esp(RM062X) a=1.10 (a.u.) = -2422.4182545762  
 Esp(RM062X+D3) a=1.15 (a.u.) = -2422.42281541  
 Esp(RM062X) a=1.15 (a.u.) = -2422.4132704762  
 Esp(RM062X+D3) a=1.20 (a.u.) = -2422.41855206  
 Esp(RM062X) a=1.20 (a.u.) = -2422.4090071262  
 Esp(RM062X+D3) SMD (a.u.) = -2422.44716859

Esp(RM062X) SMD (a.u.) = -2422.4376236562  
Esp(RM062X+D3) GAS (a.u.) = -2422.37736112  
Esp(RM062X) GAS (a.u.) = -2422.3678161862

Optimised cartesian coordinates (Angstrom):

C 6.413013 -2.251818 -0.681046  
C 5.898146 -3.293324 -1.467805  
C 4.545875 -3.346271 -1.786810  
C 3.718960 -2.335257 -1.295140  
C 4.232914 -1.306523 -0.504419  
H 6.566934 -4.070265 -1.838375  
H 4.141854 -4.149797 -2.403006  
C 2.017702 -0.694038 -0.589529  
C 1.073746 1.302463 0.497046  
C 2.247503 1.130856 1.474827  
C 3.510489 0.761759 0.721731  
H 4.307319 0.482892 1.422006  
S 1.998397 -2.140138 -1.556796  
N 3.234734 -0.404921 -0.118349  
N 0.943259 0.085683 -0.341607  
C 2.440363 2.329117 2.432503  
C 3.385773 3.413865 1.907358  
C 2.920280 1.828766 3.796558  
H 1.445932 2.781979 2.578246  
H 4.424928 3.050340 1.881409  
H 3.117829 3.765624 0.901370  
H 3.362488 4.279759 2.583635  
H 2.197273 1.132059 4.244591  
H 3.886614 1.307781 3.707758  
H 3.059425 2.670705 4.489004  
H 1.980175 0.258477 2.088639  
H 0.167919 1.332320 1.117488  
C 1.145173 2.551522 -0.357293  
C 0.480290 3.708839 0.062573  
C 1.907905 2.589439 -1.529149  
C 0.603640 4.895067 -0.658628  
H -0.137600 3.684807 0.963837  
C 2.031617 3.776633 -2.251222

H 2.409276 1.690396 -1.896661  
C 1.386319 4.932971 -1.813294  
H 0.082294 5.791188 -0.319863  
H 2.632084 3.794747 -3.161505  
H 1.483049 5.860593 -2.378837  
C -1.426004 0.667321 -0.740122  
H -1.296195 1.643732 -0.280842  
C -2.661842 0.260178 -1.134358  
C -3.747220 1.296095 -1.219159  
F -3.478283 2.168370 -2.203854  
F -4.942386 0.777062 -1.498033  
F -3.858072 2.012910 -0.099103  
O -0.367666 -1.232660 -1.653020  
C -0.307737 -0.234612 -0.963295  
H 3.877275 1.578328 0.081726  
C 5.592125 -1.243309 -0.189163  
H 6.003358 -0.432900 0.411252  
H 7.478228 -2.227422 -0.450786  
H -2.809382 -0.648117 -1.721224  
C -7.051815 -1.337678 -0.434891  
H -7.218370 -0.300861 -0.759912  
H -7.392741 -2.032724 -1.209634  
H -7.616614 -1.505013 0.492949  
C -5.057319 -0.805500 0.664828  
O -5.672906 -1.587586 -0.248653  
O -5.686362 0.009297 1.320684  
C -2.919933 -2.194278 0.299821  
O -3.214465 -3.030875 -0.553320  
C -3.635132 -1.028471 0.773798  
C -1.585898 -1.125481 1.949819  
C -0.461414 -0.934329 2.756814  
C -1.623824 -2.196310 1.054288  
C 0.604922 -1.830405 2.645334  
H -0.416902 -0.107262 3.470465  
C -0.557154 -3.085338 0.927467  
C 0.564678 -2.895228 1.731301  
H 1.483276 -1.707276 3.283006

|   |           |           |          |
|---|-----------|-----------|----------|
| H | -0.612562 | -3.899465 | 0.201835 |
| H | 1.416724  | -3.573857 | 1.656995 |
| C | -2.872606 | -0.342781 | 1.877763 |
| H | -2.673131 | 0.723386  | 1.665906 |
| H | -3.412421 | -0.371415 | 2.839308 |

-----  
PCMopt/16\_TS\_SRb

Frequencies, energies and thermodynamic properties:

|                                                  |                  |
|--------------------------------------------------|------------------|
| Lowest Vibrational Mode (1/cm) =                 | -163.3170        |
| 2nd Lowest Vibrational Mode (1/cm) =             | 19.8151          |
| E(RM062X) (a.u.) =                               | -2420.01182238   |
| Thermal correction to Enthalpy (a.u.) =          | 0.633077         |
| Thermal correction to Gibbs Free Energy (a.u.) = | 0.523546         |
| Total Entropy (cal/Kmol) =                       | 230.528          |
| Esp(RM062X+D3) (a.u.) =                          | -2422.42734382   |
| Esp(D3) (a.u.) =                                 | -0.0095691408    |
| Esp(RM062X) (a.u.) =                             | -2422.4177746792 |

Optimised cartesian coordinates (Angstrom):

|   |          |           |           |
|---|----------|-----------|-----------|
| C | 6.519312 | -2.003423 | -0.547679 |
| C | 6.072485 | -3.063629 | -1.350761 |
| C | 4.733158 | -3.174295 | -1.707321 |
| C | 3.849285 | -2.202344 | -1.236529 |
| C | 4.295726 | -1.155156 | -0.429321 |
| H | 6.784566 | -3.809411 | -1.704304 |
| H | 4.382045 | -3.992820 | -2.335949 |
| C | 2.058687 | -0.640109 | -0.572928 |
| C | 0.997270 | 1.304809  | 0.498336  |
| C | 2.154604 | 1.185437  | 1.502934  |
| C | 3.450871 | 0.875775  | 0.780460  |
| H | 4.242001 | 0.631668  | 1.499901  |
| S | 2.129763 | -2.080576 | -1.546652 |
| N | 3.248845 | -0.299627 | -0.068210 |
| N | 0.943857 | 0.087864  | -0.348591 |
| C | 2.269549 | 2.390543  | 2.464592  |
| C | 3.175756 | 3.518369  | 1.961465  |
| C | 2.739428 | 1.911480  | 3.839663  |
| H | 1.252291 | 2.797401  | 2.586301  |



|   |           |           |           |
|---|-----------|-----------|-----------|
| H | 4.230804  | 3.202944  | 1.958183  |
| H | 2.914113  | 3.859365  | 0.950039  |
| H | 3.097704  | 4.380920  | 2.637913  |
| H | 2.038231  | 1.182447  | 4.270619  |
| H | 3.730129  | 1.434803  | 3.773600  |
| H | 2.823975  | 2.758199  | 4.535088  |
| H | 1.912813  | 0.301087  | 2.110357  |
| H | 0.078054  | 1.288607  | 1.099138  |
| C | 1.028261  | 2.559652  | -0.349737 |
| C | 0.293111  | 3.679239  | 0.054485  |
| C | 1.821160  | 2.641998  | -1.499152 |
| C | 0.376520  | 4.873946  | -0.658413 |
| H | -0.349358 | 3.618244  | 0.936636  |
| C | 1.905046  | 3.837588  | -2.212908 |
| H | 2.377878  | 1.771303  | -1.855126 |
| C | 1.189485  | 4.957521  | -1.789497 |
| H | -0.199483 | 5.740615  | -0.331783 |
| H | 2.529586  | 3.890819  | -3.105446 |
| H | 1.255414  | 5.891785  | -2.348496 |
| C | -1.439380 | 0.560848  | -0.798468 |
| H | -1.371438 | 1.526941  | -0.305736 |
| C | -2.644165 | 0.110465  | -1.241927 |
| C | -3.764587 | 1.109095  | -1.331390 |
| F | -3.519379 | 1.985923  | -2.318514 |
| F | -4.944160 | 0.556868  | -1.609901 |
| F | -3.898410 | 1.826052  | -0.213370 |
| O | -0.268506 | -1.270064 | -1.714710 |
| C | -0.274490 | -0.281591 | -1.008507 |
| H | 3.796214  | 1.709825  | 0.151140  |
| C | 5.641635  | -1.033695 | -0.076449 |
| H | 6.000256  | -0.208340 | 0.537010  |
| H | 7.575671  | -1.933208 | -0.287952 |
| H | -2.732909 | -0.781113 | -1.865322 |
| C | -7.004098 | -0.100065 | 0.786038  |
| H | -7.570385 | -1.009876 | 1.029930  |
| H | -7.334024 | 0.726711  | 1.424234  |
| H | -7.181494 | 0.147090  | -0.270197 |

C -5.015447 -1.259652 0.315808  
 O -5.623380 -0.274425 1.031767  
 O -5.658783 -1.972331 -0.430914  
 C -2.767323 -2.402688 0.130102  
 O -2.959989 -3.244588 -0.746027  
 C -3.595385 -1.302236 0.572582  
 C -1.609600 -1.257254 1.855566  
 C -0.548017 -0.992746 2.725253  
 C -1.517673 -2.317955 0.951925  
 C 0.585636 -1.807419 2.667965  
 H -0.603999 -0.172919 3.446170  
 C -0.382384 -3.124276 0.878190  
 C 0.675567 -2.862098 1.745476  
 H 1.414869 -1.628018 3.355965  
 H -0.337207 -3.931713 0.144387  
 H 1.578044 -3.475865 1.714892  
 C -2.948193 -0.572964 1.724818  
 H -2.820336 0.508198 1.540606  
 H -3.527211 -0.661486 2.659340

-----  
 PCMOpt/16\_TS\_SRc

Frequencies, energies and thermodynamic properties:

Lowest Vibrational Mode (1/cm) = -163.7332  
 2nd Lowest Vibrational Mode (1/cm) = 19.7263  
 E(RM062X) (a.u.) = -2420.01182238  
 Thermal correction to Enthalpy (a.u.) = 0.633079  
 Thermal correction to Gibbs Free Energy (a.u.) = 0.523555  
 Total Entropy (cal/Kmol) = 230.512  
 Esp(RM062X+D3) (a.u.) = -2422.42733272  
 Esp(D3) (a.u.) = -0.0095690114  
 Esp(RM062X) (a.u.) = -2422.4177637086

Optimised cartesian coordinates (Angstrom):

C 6.520000 -2.002644 -0.547693  
 C 6.073268 -3.063242 -1.350305  
 C 4.733902 -3.174323 -1.706601  
 C 3.849903 -2.202375 -1.236047  
 C 4.296256 -1.154786 -0.429310

|   |           |           |           |
|---|-----------|-----------|-----------|
| H | 6.785449  | -3.809006 | -1.703685 |
| H | 4.382850  | -3.993171 | -2.334844 |
| C | 2.059072  | -0.640260 | -0.572761 |
| C | 0.997332  | 1.304593  | 0.498272  |
| C | 2.154862  | 1.185657  | 1.502695  |
| C | 3.451082  | 0.876335  | 0.779983  |
| H | 4.242503  | 0.632716  | 1.499268  |
| S | 2.130286  | -2.081133 | -1.545888 |
| N | 3.249248  | -0.299360 | -0.068331 |
| N | 0.944156  | 0.087570  | -0.348551 |
| C | 2.269622  | 2.390859  | 2.464239  |
| C | 3.175350  | 3.518923  | 1.960754  |
| C | 2.740048  | 1.912172  | 3.839259  |
| H | 1.252257  | 2.797385  | 2.586145  |
| H | 4.230538  | 3.203955  | 1.957699  |
| H | 2.913662  | 3.859393  | 0.949164  |
| H | 3.096836  | 4.381711  | 2.636843  |
| H | 2.038925  | 1.183512  | 4.270982  |
| H | 3.730607  | 1.435232  | 3.772934  |
| H | 2.825197  | 2.759190  | 4.534251  |
| H | 1.913447  | 0.301275  | 2.110207  |
| H | 0.078186  | 1.288170  | 1.099172  |
| C | 1.027842  | 2.559383  | -0.349899 |
| C | 0.292561  | 3.678837  | 0.054456  |
| C | 1.820400  | 2.641826  | -1.499537 |
| C | 0.375518  | 4.873518  | -0.658533 |
| H | -0.349674 | 3.617732  | 0.936768  |
| C | 1.903835  | 3.837394  | -2.213388 |
| H | 2.377210  | 1.771223  | -1.855593 |
| C | 1.188155  | 4.957200  | -1.789847 |
| H | -0.200584 | 5.740083  | -0.331799 |
| H | 2.528112  | 3.890703  | -3.106106 |
| H | 1.253732  | 5.891445  | -2.348919 |
| C | -1.439126 | 0.560057  | -0.798350 |
| H | -1.371155 | 1.526228  | -0.305770 |
| C | -2.644021 | 0.109568  | -1.241662 |
| C | -3.764165 | 1.108456  | -1.331372 |

F -3.518681 1.985140 -2.318563  
F -4.943883 0.556533 -1.609950  
F -3.897860 1.825547 -0.213397  
O -0.268222 -1.271166 -1.713912  
C -0.274286 -0.282341 -1.008166  
H 3.795931 1.710374 0.150374  
C 5.642191 -1.032926 -0.076683  
H 6.000733 -0.207274 0.536422  
H 7.576387 -1.932106 -0.288162  
H -2.732610 -0.781735 -1.865465  
C -7.004177 -0.099140 0.785579  
H -7.570557 -1.008732 1.030066  
H -7.333884 0.728050 1.423346  
H -7.181652 0.147432 -0.270776  
C -5.015758 -1.259239 0.315739  
O -5.623444 -0.273579 1.031231  
O -5.659229 -1.972263 -0.430506  
C -2.767990 -2.403060 0.130690  
O -2.961008 -3.245433 -0.744877  
C -3.595601 -1.301853 0.572325  
C -1.609859 -1.256743 1.855257  
C -0.547874 -0.991562 2.724269  
C -1.518334 -2.318182 0.952436  
C 0.585700 -1.806348 2.667164  
H -0.603446 -0.171001 3.444390  
C -0.383217 -3.124783 0.879060  
C 0.675099 -2.861954 1.745679  
H 1.415446 -1.626056 3.354311  
H -0.338391 -3.932830 0.145910  
H 1.577507 -3.475824 1.715261  
C -2.948374 -0.572451 1.724420  
H -3.527366 -0.660970 2.658966  
H -2.820836 0.508690 1.540017

-----  
PCMopt/16\_TS\_SRd

Frequencies, energies and thermodynamic properties:

Lowest Vibrational Mode (1/cm) = -271.1705

|                                                  |                  |
|--------------------------------------------------|------------------|
| 2nd Lowest Vibrational Mode (1/cm) =             | 17.7705          |
| E(RM062X) (a.u.) =                               | -2420.01976482   |
| Thermal correction to Enthalpy (a.u.) =          | 0.633572         |
| Thermal correction to Gibbs Free Energy (a.u.) = | 0.525589         |
| Total Entropy (cal/Kmol) =                       | 227.268          |
| Esp(RM062X+D3) (a.u.) =                          | -2422.42775276   |
| Esp(D3) (a.u.) =                                 | -0.0091100418    |
| Esp(RM062X) (a.u.) =                             | -2422.4186427182 |

Optimised cartesian coordinates (Angstrom):

|   |           |           |           |
|---|-----------|-----------|-----------|
| C | 7.217928  | -0.837850 | 0.612744  |
| C | 7.212037  | -2.035810 | -0.114679 |
| C | 6.033997  | -2.529388 | -0.668531 |
| C | 4.864030  | -1.795381 | -0.480086 |
| C | 4.872306  | -0.606519 | 0.252527  |
| H | 8.141410  | -2.588768 | -0.251864 |
| H | 6.024857  | -3.460336 | -1.235746 |
| C | 2.650018  | -0.704407 | -0.339530 |
| C | 0.993985  | 1.010071  | 0.203397  |
| C | 1.837806  | 1.180231  | 1.475289  |
| C | 3.316499  | 1.161909  | 1.129021  |
| H | 3.932219  | 1.099759  | 2.036107  |
| S | 3.246949  | -2.187802 | -1.039627 |
| N | 3.598682  | -0.033349 | 0.329774  |
| N | 1.403912  | -0.244566 | -0.471279 |
| C | 1.421502  | 2.400258  | 2.326815  |
| C | 2.148646  | 3.700176  | 1.970618  |
| C | 1.601725  | 2.088379  | 3.813729  |
| H | 0.343414  | 2.546763  | 2.146004  |
| H | 3.210248  | 3.648837  | 2.259681  |
| H | 2.094068  | 3.939575  | 0.899401  |
| H | 1.701713  | 4.536878  | 2.525953  |
| H | 0.998407  | 1.220198  | 4.114391  |
| H | 2.656108  | 1.868493  | 4.045012  |
| H | 1.298743  | 2.947380  | 4.429081  |
| H | 1.623756  | 0.274448  | 2.066168  |
| H | -0.034907 | 0.833208  | 0.543539  |
| C | 1.011031  | 2.192389  | -0.739424 |

C -0.052766 3.101153 -0.682452  
C 2.066309 2.428121 -1.627112  
C -0.037633 4.252360 -1.469110  
H -0.898224 2.883284 -0.023803  
C 2.079241 3.578615 -2.416197  
H 2.886203 1.710614 -1.716878  
C 1.032856 4.497810 -2.330579  
H -0.868878 4.957004 -1.415603  
H 2.908647 3.755312 -3.102441  
H 1.044857 5.397912 -2.946894  
C -0.856802 -0.424402 -1.366027  
H -0.931287 0.659995 -1.385877  
C -2.011007 -1.180474 -1.390101  
C -3.183986 -0.605130 -2.133483  
F -2.982420 -0.715788 -3.455814  
F -4.340447 -1.222955 -1.883283  
F -3.362133 0.694720 -1.881837  
O 0.660684 -2.244633 -1.299357  
C 0.384571 -1.074190 -1.077788  
H 3.623329 2.052391 0.560042  
C 6.050416 -0.105754 0.807879  
H 6.062586 0.829189 1.366939  
H 8.152963 -0.467348 1.033390  
H -1.939874 -2.269372 -1.464710  
C -0.372280 -3.895549 1.488839  
H -0.026972 -3.614698 2.493008  
H -0.585766 -4.968451 1.451412  
H 0.403833 -3.631930 0.755908  
C -1.533944 -1.886548 1.150407  
O -1.587561 -3.234492 1.169137  
O -0.510012 -1.289732 1.430302  
C -3.012002 0.138415 0.890593  
O -2.194950 1.052069 0.967757  
C -2.770043 -1.287791 0.683436  
C -5.111343 -0.949465 0.882311  
C -6.502319 -1.036563 0.907932  
C -4.493964 0.302905 0.941956

|   |           |           |           |
|---|-----------|-----------|-----------|
| C | -7.247389 | 0.141668  | 1.000755  |
| H | -7.004132 | -2.004902 | 0.857029  |
| C | -5.229122 | 1.483640  | 1.033903  |
| C | -6.619503 | 1.393977  | 1.063770  |
| H | -8.337306 | 0.087923  | 1.023940  |
| H | -4.716165 | 2.446458  | 1.077422  |
| H | -7.226336 | 2.298048  | 1.133915  |
| C | -4.079685 | -2.048638 | 0.791610  |
| H | -4.275075 | -2.721073 | -0.057293 |
| H | -4.098769 | -2.675377 | 1.698452  |

-----  
PCMopt/16\_TS\_SRe

Frequencies, energies and thermodynamic properties:

|                                                  |                  |
|--------------------------------------------------|------------------|
| Lowest Vibrational Mode (1/cm) =                 | -243.9716        |
| 2nd Lowest Vibrational Mode (1/cm) =             | 19.6754          |
| E(RM062X) (a.u.) =                               | -2420.01645764   |
| Thermal correction to Enthalpy (a.u.) =          | 0.633433         |
| Thermal correction to Gibbs Free Energy (a.u.) = | 0.525736         |
| Total Entropy (cal/Kmol) =                       | 226.668          |
| Esp(RM062X+D3) (a.u.) =                          | -2422.42624801   |
| Esp(D3) (a.u.) =                                 | -0.0092622237    |
| Esp(RM062X) (a.u.) =                             | -2422.4169857863 |

Optimised cartesian coordinates (Angstrom):

|   |           |           |           |
|---|-----------|-----------|-----------|
| C | -7.240602 | -0.752178 | -0.478746 |
| C | -7.225019 | -1.988811 | 0.181366  |
| C | -6.034572 | -2.528703 | 0.659095  |
| C | -4.861323 | -1.801864 | 0.461609  |
| C | -4.879488 | -0.574554 | -0.203822 |
| H | -8.157139 | -2.535137 | 0.326110  |
| H | -6.017584 | -3.488838 | 1.175060  |
| C | -2.638494 | -0.737695 | 0.291847  |
| C | -0.965596 | 0.976117  | -0.233732 |
| C | -1.879353 | 1.266361  | -1.435533 |
| C | -3.336544 | 1.238670  | -1.008530 |
| H | -4.000018 | 1.264502  | -1.882721 |
| S | -3.232425 | -2.242952 | 0.942018  |
| N | -3.599929 | -0.015636 | -0.298627 |

|   |           |           |           |
|---|-----------|-----------|-----------|
| N | -1.373791 | -0.308495 | 0.385566  |
| C | -1.493156 | 2.550437  | -2.205590 |
| C | -2.183203 | 3.823079  | -1.705082 |
| C | -1.759936 | 2.364071  | -3.700609 |
| H | -0.405391 | 2.673788  | -2.074190 |
| H | -3.259078 | 3.805806  | -1.939943 |
| H | -2.068432 | 3.975356  | -0.622905 |
| H | -1.754536 | 4.697162  | -2.215213 |
| H | -1.183320 | 1.521452  | -4.107494 |
| H | -2.827767 | 2.170172  | -3.889188 |
| H | -1.483480 | 3.270157  | -4.257902 |
| H | -1.728462 | 0.419906  | -2.124705 |
| H | 0.042471  | 0.795348  | -0.635284 |
| C | -0.900500 | 2.097104  | 0.780898  |
| C | 0.172580  | 2.993824  | 0.713244  |
| C | -1.895474 | 2.289631  | 1.744595  |
| C | 0.223675  | 4.094731  | 1.566994  |
| H | 0.974441  | 2.804471  | -0.005844 |
| C | -1.842429 | 3.390424  | 2.600327  |
| H | -2.719124 | 1.577611  | 1.843448  |
| C | -0.789332 | 4.300625  | 2.505182  |
| H | 1.061521  | 4.790712  | 1.505150  |
| H | -2.625523 | 3.534554  | 3.345909  |
| H | -0.749927 | 5.161956  | 3.173474  |
| C | 0.884212  | -0.518181 | 1.291749  |
| H | 0.973963  | 0.563736  | 1.314773  |
| C | 2.021427  | -1.289309 | 1.362233  |
| C | 3.185355  | -0.699532 | 2.109499  |
| F | 2.959126  | -0.775060 | 3.430579  |
| F | 4.343827  | -1.324991 | 1.896719  |
| F | 3.368829  | 0.593222  | 1.826993  |
| O | -0.653796 | -2.318607 | 1.198015  |
| C | -0.365339 | -1.149608 | 0.991694  |
| H | -3.594144 | 2.081459  | -0.349949 |
| C | -6.070755 | -0.026557 | -0.681461 |
| H | -6.091508 | 0.938413  | -1.186452 |
| H | -8.185757 | -0.345879 | -0.839353 |



H 1.944310 -2.376829 1.442883  
 C -0.472252 -2.377388 -1.958571  
 H -0.866424 -2.979224 -1.126591  
 H -1.238179 -1.681750 -2.319462  
 H -0.165460 -3.047444 -2.771583  
 C 1.734886 -2.275650 -1.189912  
 O 0.621649 -1.585579 -1.517472  
 O 1.769162 -3.489431 -1.270672  
 C 2.979773 -0.027101 -0.966226  
 O 2.102408 0.828721 -1.079988  
 C 2.848579 -1.457428 -0.731912  
 C 5.161759 -0.939512 -0.870015  
 C 6.555217 -0.913545 -0.850164  
 C 4.446306 0.255909 -0.977899  
 C 7.205541 0.319152 -0.949218  
 H 7.131612 -1.836524 -0.760348  
 C 5.086403 1.490268 -1.076049  
 C 6.480084 1.513695 -1.062094  
 H 8.296420 0.354186 -0.938333  
 H 4.500039 2.407655 -1.158093  
 H 7.013314 2.462810 -1.136433  
 C 4.216677 -2.112258 -0.788630  
 H 4.438158 -2.759436 0.072955  
 H 4.303787 -2.748690 -1.685535

-----

PCMopt/16\_TS\_SRF

Frequencies, energies and thermodynamic properties:

Lowest Vibrational Mode (1/cm) = -209.5902  
 2nd Lowest Vibrational Mode (1/cm) = 16.0920  
 E(RM062X) (a.u.) = -2420.00621907  
 Thermal correction to Enthalpy (a.u.) = 0.633162  
 Thermal correction to Gibbs Free Energy (a.u.) = 0.523628  
 Total Entropy (cal/Kmol) = 230.534  
 Esp(RM062X+D3) (a.u.) = -2422.41928245  
 Esp(D3) (a.u.) = -0.0091672872  
 Esp(RM062X) (a.u.) = -2422.4101151628

Optimised cartesian coordinates (Angstrom):

|   |           |           |           |
|---|-----------|-----------|-----------|
| C | -6.805450 | 2.213190  | 0.102302  |
| C | -6.470453 | 3.285158  | -0.737412 |
| C | -5.177867 | 3.429223  | -1.231866 |
| C | -4.228983 | 2.474892  | -0.866678 |
| C | -4.563680 | 1.414646  | -0.022397 |
| H | -7.232665 | 4.015028  | -1.010478 |
| H | -4.912989 | 4.259508  | -1.886689 |
| C | -2.350025 | 0.936652  | -0.422408 |
| C | -1.178296 | -1.038771 | 0.437140  |
| C | -2.132532 | -0.878629 | 1.632260  |
| C | -3.533565 | -0.559284 | 1.141367  |
| H | -4.181748 | -0.266043 | 1.977379  |
| S | -2.537843 | 2.413698  | -1.326509 |
| N | -3.467407 | 0.579773  | 0.221868  |
| N | -1.230448 | 0.196930  | -0.384085 |
| C | -2.089178 | -2.069915 | 2.617140  |
| C | -3.079938 | -3.193568 | 2.297813  |
| C | -2.305583 | -1.574137 | 4.048312  |
| H | -1.068571 | -2.483397 | 2.558387  |
| H | -4.116155 | -2.866797 | 2.477804  |
| H | -3.005264 | -3.549479 | 1.260900  |
| H | -2.890241 | -4.048831 | 2.961449  |
| H | -1.539255 | -0.841656 | 4.338506  |
| H | -3.292629 | -1.096891 | 4.154652  |
| H | -2.264621 | -2.413127 | 4.757049  |
| H | -1.768778 | 0.009790  | 2.174727  |
| H | -0.159903 | -1.081464 | 0.848481  |
| C | -1.406633 | -2.286011 | -0.389271 |
| C | -0.600361 | -3.403073 | -0.137930 |
| C | -2.415999 | -2.370095 | -1.353358 |
| C | -0.831678 | -4.601983 | -0.810462 |
| H | 0.222265  | -3.312835 | 0.577452  |
| C | -2.645213 | -3.570390 | -2.027037 |
| H | -3.028944 | -1.497915 | -1.595418 |
| C | -1.861315 | -4.690560 | -1.748835 |
| H | -0.200675 | -5.468349 | -0.606695 |
| H | -3.437517 | -3.628211 | -2.774527 |

H -2.042946 -5.628387 -2.275601  
C 1.013476 -0.314506 -1.195379  
H 0.791795 -1.374683 -1.100156  
C 2.314074 0.085122 -1.349142  
C 3.259453 -0.874816 -2.012057  
F 3.093154 -0.818195 -3.345291  
F 4.540099 -0.619416 -1.783096  
F 3.021490 -2.143862 -1.656919  
O -0.018130 1.810755 -1.455735  
C -0.037043 0.660395 -1.055551  
H -3.998618 -1.409510 0.620639  
C -5.859802 1.262524 0.472688  
H -6.128709 0.426172 1.116907  
H -7.826493 2.117483 0.472005  
H 2.552467 1.140600 -1.507121  
C 3.824852 -3.418501 1.027785  
H 3.101743 -3.758785 0.273228  
H 4.791508 -3.905871 0.864545  
H 3.440811 -3.669361 2.025888  
C 2.985577 -1.232388 1.083030  
O 4.054266 -2.026350 0.905312  
O 1.893365 -1.693856 1.397981  
C 4.497803 0.840127 0.660291  
O 5.624274 0.393441 0.504643  
C 3.206172 0.166615 0.811583  
C 2.851054 2.488852 1.120665  
C 2.331789 3.775369 1.243921  
C 4.183850 2.307338 0.743530  
C 3.173069 4.863914 0.991945  
H 1.289900 3.935388 1.528856  
C 5.032356 3.385155 0.504758  
C 4.513116 4.674503 0.629753  
H 2.780375 5.878524 1.079572  
H 6.072510 3.210761 0.221974  
H 5.147954 5.541805 0.441438  
C 2.195940 1.148719 1.349348  
H 2.013477 0.986820 2.426766

H 1.205571 1.070362 0.872812

-----  
PCMopt/16\_TS\_SSa

Frequencies, energies and thermodynamic properties:

Lowest Vibrational Mode (1/cm) = -228.4682  
2nd Lowest Vibrational Mode (1/cm) = 18.2967  
E(RM062X) (a.u.) = -2420.01576747  
Thermal correction to Enthalpy (a.u.) = 0.633283  
Thermal correction to Gibbs Free Energy (a.u.) = 0.523926  
Total Entropy (cal/Kmol) = 230.161  
Esp(RM062X+D3) (a.u.) = -2422.42706155  
Esp(D3) (a.u.) = -0.0093384844  
Esp(RM062X) (a.u.) = -2422.4177230656  
Esp(RM062X+D3) a=1.00 (a.u.) = -2422.43700335  
Esp(RM062X) a=1.00 (a.u.) = -2422.4276648656  
Esp(RM062X+D3) a=1.05 (a.u.) = -2422.43151760  
Esp(RM062X) a=1.05 (a.u.) = -2422.4221791156  
Esp(RM062X+D3) a=1.10 (a.u.) = -2422.42706155  
Esp(RM062X) a=1.10 (a.u.) = -2422.4177230656  
Esp(RM062X+D3) a=1.15 (a.u.) = -2422.42327171  
Esp(RM062X) a=1.15 (a.u.) = -2422.4139332256  
Esp(RM062X+D3) a=1.20 (a.u.) = -2422.42012651  
Esp(RM062X) a=1.20 (a.u.) = -2422.4107880256  
Esp(RM062X+D3) SMD (a.u.) = -2422.44795042  
Esp(RM062X) SMD (a.u.) = -2422.4386119356  
Esp(RM062X+D3) GAS (a.u.) = -2422.39474331  
Esp(RM062X) GAS (a.u.) = -2422.3854048256

Optimised cartesian coordinates (Angstrom):

C -6.439982 2.354925 0.105587  
C -6.044571 3.417978 -0.718141  
C -4.748860 3.487355 -1.221841  
C -3.859662 2.468189 -0.883644  
C -4.254806 1.415717 -0.056061  
H -6.760514 4.200085 -0.971172  
H -4.436939 4.311018 -1.864345  
C -2.077742 0.802238 -0.486529  
C -1.020672 -1.245888 0.337031

|   |           |           |           |
|---|-----------|-----------|-----------|
| C | -1.956028 | -1.045315 | 1.540293  |
| C | -3.339240 | -0.637055 | 1.065414  |
| H | -3.963213 | -0.319902 | 1.911262  |
| S | -2.178153 | 2.309205  | -1.360663 |
| N | -3.212782 | 0.508290  | 0.162840  |
| N | -1.014451 | -0.007734 | -0.475133 |
| C | -1.983222 | -2.246253 | 2.512571  |
| C | -3.039141 | -3.306128 | 2.183397  |
| C | -2.166241 | -1.752265 | 3.948987  |
| H | -0.990542 | -2.722361 | 2.450184  |
| H | -4.054133 | -2.921454 | 2.369623  |
| H | -2.987411 | -3.652691 | 1.141711  |
| H | -2.898962 | -4.179323 | 2.835963  |
| H | -1.354461 | -1.072675 | 4.243905  |
| H | -3.120595 | -1.213822 | 4.061258  |
| H | -2.178341 | -2.598746 | 4.649978  |
| H | -1.522664 | -0.187460 | 2.080431  |
| H | -0.006582 | -1.313488 | 0.752732  |
| C | -1.319788 | -2.463400 | -0.510466 |
| C | -0.597127 | -3.640279 | -0.286898 |
| C | -2.329356 | -2.459496 | -1.479236 |
| C | -0.903656 | -4.805383 | -0.988087 |
| H | 0.215629  | -3.641456 | 0.443272  |
| C | -2.636912 | -3.624252 | -2.182551 |
| H | -2.881954 | -1.542834 | -1.700806 |
| C | -1.931393 | -4.801563 | -1.931825 |
| H | -0.333857 | -5.716474 | -0.800882 |
| H | -3.429102 | -3.609530 | -2.932251 |
| H | -2.173377 | -5.711773 | -2.482122 |
| C | 1.263608  | -0.561071 | -1.190479 |
| H | 1.084007  | -1.612008 | -0.982329 |
| C | 2.552456  | -0.111767 | -1.346239 |
| C | 3.579231  | -1.103835 | -1.815318 |
| F | 3.456712  | -1.299035 | -3.137253 |
| F | 4.839132  | -0.718132 | -1.611403 |
| F | 3.429619  | -2.301529 | -1.237466 |
| O | 0.270579  | 1.557247  | -1.533488 |

|   |           |           |           |
|---|-----------|-----------|-----------|
| C | 0.215071  | 0.415255  | -1.106868 |
| H | -3.856865 | -1.451768 | 0.537131  |
| C | -5.553324 | 1.338873  | 0.449336  |
| H | -5.869693 | 0.510739  | 1.082462  |
| H | -7.461578 | 2.317865  | 0.484293  |
| H | 2.736346  | 0.910759  | -1.687189 |
| C | 2.891940  | -3.005157 | 1.864807  |
| H | 3.575278  | -3.015586 | 2.724089  |
| H | 1.932086  | -3.450099 | 2.148145  |
| H | 3.348301  | -3.577459 | 1.044952  |
| C | 3.697264  | -0.923408 | 1.168753  |
| O | 2.615789  | -1.677996 | 1.451057  |
| O | 4.825509  | -1.361171 | 1.288981  |
| C | 2.165573  | 1.124871  | 1.063656  |
| O | 1.062946  | 0.666822  | 1.365100  |
| C | 3.374755  | 0.415994  | 0.694774  |
| C | 3.807100  | 2.747386  | 0.562317  |
| C | 4.311811  | 4.029783  | 0.346977  |
| C | 2.461914  | 2.578031  | 0.897924  |
| C | 3.451888  | 5.121435  | 0.488035  |
| H | 5.358706  | 4.182259  | 0.076786  |
| C | 1.595694  | 3.661242  | 1.039156  |
| C | 2.103575  | 4.941990  | 0.831392  |
| H | 3.833572  | 6.131262  | 0.327204  |
| H | 0.547099  | 3.493090  | 1.292867  |
| H | 1.453290  | 5.812627  | 0.930881  |
| C | 4.499665  | 1.408984  | 0.486090  |
| H | 5.268487  | 1.311188  | 1.270794  |
| H | 5.022367  | 1.281528  | -0.474151 |

-----  
PCMopt/16\_TS\_SSb

Frequencies, energies and thermodynamic properties:

|                                                  |                |
|--------------------------------------------------|----------------|
| Lowest Vibrational Mode (1/cm) =                 | -272.7859      |
| 2nd Lowest Vibrational Mode (1/cm) =             | 16.3961        |
| E(RM062X) (a.u.) =                               | -2420.01903367 |
| Thermal correction to Enthalpy (a.u.) =          | 0.633439       |
| Thermal correction to Gibbs Free Energy (a.u.) = | 0.524981       |

|                            |                  |
|----------------------------|------------------|
| Total Entropy (cal/Kmol) = | 228.270          |
| Esp(RM062X+D3) (a.u.) =    | -2422.42747506   |
| Esp(D3) (a.u.) =           | -0.0091529041    |
| Esp(RM062X) (a.u.) =       | -2422.4183221559 |

Optimised cartesian coordinates (Angstrom):

|   |           |           |           |
|---|-----------|-----------|-----------|
| C | -6.694761 | 2.071273  | 0.093789  |
| C | -6.406921 | 3.087384  | -0.827490 |
| C | -5.135999 | 3.208716  | -1.382927 |
| C | -4.162255 | 2.288925  | -0.997475 |
| C | -4.450385 | 1.283252  | -0.072355 |
| H | -7.187378 | 3.791502  | -1.116349 |
| H | -4.907293 | 3.997165  | -2.100290 |
| C | -2.247999 | 0.794688  | -0.532849 |
| C | -1.024627 | -1.105582 | 0.397939  |
| C | -1.913472 | -0.858613 | 1.626299  |
| C | -3.343248 | -0.585171 | 1.192655  |
| H | -3.947257 | -0.227314 | 2.037145  |
| S | -2.486011 | 2.218305  | -1.515042 |
| N | -3.337053 | 0.475465  | 0.182308  |
| N | -1.132175 | 0.065011  | -0.505050 |
| C | -1.801856 | -1.964812 | 2.699051  |
| C | -2.790970 | -3.121209 | 2.525076  |
| C | -1.945763 | -1.357089 | 4.095823  |
| H | -0.779860 | -2.371333 | 2.617092  |
| H | -3.821231 | -2.792868 | 2.734437  |
| H | -2.766081 | -3.556034 | 1.516068  |
| H | -2.553688 | -3.919859 | 3.242046  |
| H | -1.858622 | -2.135144 | 4.867410  |
| H | -1.171681 | -0.599438 | 4.282465  |
| H | -2.929840 | -0.877014 | 4.217002  |
| H | -1.515412 | 0.070754  | 2.065820  |
| H | 0.010146  | -1.088724 | 0.763395  |
| C | -1.280974 | -2.409000 | -0.324980 |
| C | -0.442874 | -3.495993 | -0.047713 |
| C | -2.344423 | -2.575119 | -1.218422 |
| C | -0.694007 | -4.742715 | -0.619230 |
| H | 0.418129  | -3.345502 | 0.609704  |

C -2.593221 -3.822110 -1.792814  
H -2.985369 -1.729163 -1.480583  
C -1.775553 -4.910325 -1.485486  
H -0.037961 -5.584948 -0.394215  
H -3.427481 -3.942460 -2.485337  
H -1.972548 -5.885274 -1.933637  
C 1.116533 -0.421590 -1.305215  
H 0.937638 -1.476207 -1.113939  
C 2.416651 0.020881 -1.438431  
C 3.399133 -0.961744 -2.019195  
F 3.227557 -1.041788 -3.347252  
F 4.679807 -0.641896 -1.830119  
F 3.226629 -2.198444 -1.537056  
O 0.051088 1.673084 -1.629205  
C 0.058525 0.533634 -1.190725  
H -3.829016 -1.477849 0.770823  
C -5.722835 1.155050 0.485544  
H -5.954590 0.361456 1.195091  
H -7.698289 1.991546 0.512178  
H 2.609940 1.054752 -1.739274  
C 4.473192 -3.014152 1.274182  
H 3.919004 -3.576484 0.510225  
H 5.531419 -3.292873 1.252724  
H 4.044320 -3.236919 2.260424  
C 3.190052 -1.068657 0.989449  
O 4.419073 -1.624527 0.999735  
O 2.193547 -1.719067 1.247331  
C 2.132081 1.212105 0.993910  
O 0.970784 0.913856 1.259355  
C 3.220030 0.331138 0.588388  
C 4.036571 2.563627 0.675047  
C 4.755454 3.754785 0.577442  
C 2.667647 2.601341 0.948176  
C 4.080076 4.962664 0.767555  
H 5.825238 3.748163 0.359256  
C 1.984207 3.801753 1.139017  
C 2.705434 4.990169 1.045965



|   |          |          |           |
|---|----------|----------|-----------|
| H | 4.630153 | 5.902694 | 0.696623  |
| H | 0.912052 | 3.794560 | 1.345447  |
| H | 2.203512 | 5.948840 | 1.185736  |
| C | 4.506524 | 1.137156 | 0.523210  |
| H | 5.189571 | 0.861139 | 1.343687  |
| H | 5.071563 | 1.001028 | -0.408453 |

-----  
 PCMopt/16\_TS\_SSc

Frequencies, energies and thermodynamic properties:

|                                                  |                  |
|--------------------------------------------------|------------------|
| Lowest Vibrational Mode (1/cm) =                 | -139.9894        |
| 2nd Lowest Vibrational Mode (1/cm) =             | 18.5385          |
| E(RM062X) (a.u.) =                               | -2420.00858139   |
| Thermal correction to Enthalpy (a.u.) =          | 0.633168         |
| Thermal correction to Gibbs Free Energy (a.u.) = | 0.523508         |
| Total Entropy (cal/Kmol) =                       | 230.800          |
| Esp(RM062X+D3) (a.u.) =                          | -2422.42636594   |
| Esp(D3) (a.u.) =                                 | -0.0095707929    |
| Esp(RM062X) (a.u.) =                             | -2422.4167951471 |

Optimised cartesian coordinates (Angstrom):

|   |          |           |           |
|---|----------|-----------|-----------|
| C | 6.804401 | -2.161809 | -0.049880 |
| C | 6.392590 | -3.460369 | -0.385821 |
| C | 5.047166 | -3.758015 | -0.572033 |
| C | 4.122646 | -2.725516 | -0.410485 |
| C | 4.535154 | -1.437348 | -0.067479 |
| H | 7.137020 | -4.247385 | -0.506861 |
| H | 4.722524 | -4.764119 | -0.838160 |
| C | 2.264268 | -1.113085 | -0.223534 |
| C | 1.131829 | 1.044243  | 0.131480  |
| C | 2.318318 | 1.321478  | 1.071140  |
| C | 3.610322 | 0.841196  | 0.437412  |
| H | 4.434258 | 0.887382  | 1.160471  |
| S | 2.382439 | -2.809851 | -0.590090 |
| N | 3.450759 | -0.560140 | 0.045043  |
| N | 1.119034 | -0.397323 | -0.229550 |
| C | 2.395816 | 2.789433  | 1.553121  |
| C | 3.212069 | 3.714273  | 0.643369  |
| C | 2.954402 | 2.846924  | 2.976341  |

|   |           |           |           |
|---|-----------|-----------|-----------|
| H | 1.358937  | 3.163673  | 1.587941  |
| H | 4.284555  | 3.470778  | 0.699452  |
| H | 2.903335  | 3.669274  | -0.409754 |
| H | 3.098212  | 4.753204  | 0.982910  |
| H | 2.322674  | 2.289323  | 3.681408  |
| H | 3.969872  | 2.422881  | 3.019840  |
| H | 3.014616  | 3.888142  | 3.322505  |
| H | 2.140958  | 0.689662  | 1.955586  |
| H | 0.222653  | 1.206873  | 0.728568  |
| C | 1.094838  | 1.931367  | -1.095385 |
| C | 0.315421  | 3.093254  | -1.067215 |
| C | 1.858516  | 1.646767  | -2.231228 |
| C | 0.329275  | 3.978235  | -2.143272 |
| H | -0.308325 | 3.305723  | -0.194450 |
| C | 1.872587  | 2.532917  | -3.309021 |
| H | 2.445459  | 0.726575  | -2.291444 |
| C | 1.115753  | 3.703524  | -3.263229 |
| H | -0.279971 | 4.882211  | -2.109127 |
| H | 2.475075  | 2.303631  | -4.188746 |
| H | 1.127658  | 4.395260  | -4.106448 |
| C | -1.239926 | -0.167571 | -0.882569 |
| H | -1.122839 | 0.911932  | -0.880560 |
| C | -2.454224 | -0.688205 | -1.184053 |
| C | -3.444863 | 0.200886  | -1.881276 |
| F | -3.175356 | 0.213499  | -3.198888 |
| F | -4.704943 | -0.205781 | -1.764189 |
| F | -3.374895 | 1.464780  | -1.465295 |
| O | -0.101275 | -2.243576 | -0.765347 |
| C | -0.103861 | -1.037270 | -0.620818 |
| H | 3.889573  | 1.428422  | -0.450066 |
| C | 5.885589  | -1.131321 | 0.113420  |
| H | 6.215073  | -0.123532 | 0.362581  |
| H | 7.865680  | -1.951466 | 0.083210  |
| H | -2.624525 | -1.763168 | -1.281963 |
| C | -6.998577 | -1.948259 | -0.346919 |
| H | -7.218615 | -2.914646 | 0.127700  |
| H | -7.890645 | -1.313072 | -0.330759 |

|   |           |           |           |
|---|-----------|-----------|-----------|
| H | -6.690209 | -2.133809 | -1.386089 |
| C | -4.787050 | -1.848734 | 0.410805  |
| O | -5.992360 | -1.246912 | 0.355990  |
| O | -4.635213 | -2.991837 | 0.000556  |
| C | -3.783549 | 0.342035  | 1.360635  |
| O | -4.634353 | 1.213074  | 1.174644  |
| C | -3.732851 | -1.045197 | 0.975588  |
| C | -1.757743 | -0.597629 | 2.187324  |
| C | -0.538294 | -0.609234 | 2.866535  |
| C | -2.479806 | 0.593680  | 2.064542  |
| C | -0.068791 | 0.584089  | 3.421756  |
| H | 0.029428  | -1.535479 | 2.983703  |
| C | -1.997034 | 1.795256  | 2.583815  |
| C | -0.781632 | 1.783362  | 3.270661  |
| H | 0.863957  | 0.578769  | 3.989363  |
| H | -2.579544 | 2.711680  | 2.468279  |
| H | -0.388380 | 2.703724  | 3.707604  |
| C | -2.525673 | -1.734088 | 1.565955  |
| H | -1.918652 | -2.288922 | 0.834178  |
| H | -2.807567 | -2.467766 | 2.342622  |

-----  
 PCMopt/16\_TS\_SSd

Frequencies, energies and thermodynamic properties:

|                                                  |                  |
|--------------------------------------------------|------------------|
| Lowest Vibrational Mode (1/cm) =                 | -145.7555        |
| 2nd Lowest Vibrational Mode (1/cm) =             | 15.2490          |
| E(RM062X) (a.u.) =                               | -2420.00766941   |
| Thermal correction to Enthalpy (a.u.) =          | 0.633193         |
| Thermal correction to Gibbs Free Energy (a.u.) = | 0.522740         |
| Total Entropy (cal/Kmol) =                       | 232.466          |
| Esp(RM062X+D3) (a.u.) =                          | -2422.42546929   |
| Esp(D3) (a.u.) =                                 | -0.0095913615    |
| Esp(RM062X) (a.u.) =                             | -2422.4158779285 |

Optimised cartesian coordinates (Angstrom):

|   |          |           |           |
|---|----------|-----------|-----------|
| C | 6.664295 | -2.381346 | 0.012966  |
| C | 6.199383 | -3.659797 | -0.330850 |
| C | 4.845135 | -3.895606 | -0.539874 |
| C | 3.966118 | -2.822009 | -0.392472 |

|   |           |           |           |
|---|-----------|-----------|-----------|
| C | 4.431019  | -1.554015 | -0.041715 |
| H | 6.909064  | -4.479962 | -0.439780 |
| H | 4.478947  | -4.885810 | -0.811825 |
| C | 2.179114  | -1.128274 | -0.229303 |
| C | 1.136576  | 1.074046  | 0.127589  |
| C | 2.328686  | 1.300449  | 1.073418  |
| C | 3.602763  | 0.764067  | 0.448791  |
| H | 4.422648  | 0.774631  | 1.177691  |
| S | 2.227481  | -2.826951 | -0.602991 |
| N | 3.385502  | -0.629037 | 0.055408  |
| N | 1.065341  | -0.364199 | -0.239862 |
| C | 2.466362  | 2.764608  | 1.553894  |
| C | 3.324022  | 3.652686  | 0.645520  |
| C | 3.021595  | 2.802120  | 2.979172  |
| H | 1.446071  | 3.182399  | 1.584079  |
| H | 4.385264  | 3.364662  | 0.705720  |
| H | 3.017209  | 3.619012  | -0.408558 |
| H | 3.252589  | 4.696050  | 0.983042  |
| H | 2.362669  | 2.276851  | 3.684088  |
| H | 4.016838  | 2.333204  | 3.028743  |
| H | 3.127120  | 3.840998  | 3.321478  |
| H | 2.118832  | 0.677791  | 1.957463  |
| H | 0.233930  | 1.272270  | 0.723364  |
| C | 1.137140  | 1.964348  | -1.097352 |
| C | 0.401780  | 3.154497  | -1.069111 |
| C | 1.892547  | 1.653142  | -2.231795 |
| C | 0.451294  | 4.040127  | -2.143550 |
| H | -0.215794 | 3.388688  | -0.197472 |
| C | 1.942301  | 2.539897  | -3.308040 |
| H | 2.445039  | 0.711814  | -2.292193 |
| C | 1.229595  | 3.737910  | -3.262118 |
| H | -0.123933 | 4.966114  | -2.109295 |
| H | 2.537847  | 2.289667  | -4.186789 |
| H | 1.269257  | 4.429926  | -4.104255 |
| C | -1.285367 | -0.032190 | -0.878553 |
| H | -1.136525 | 1.041710  | -0.826373 |
| C | -2.515563 | -0.500224 | -1.202792 |

|   |           |           |           |
|---|-----------|-----------|-----------|
| C | -3.477343 | 0.451034  | -1.857867 |
| F | -3.229047 | 0.485167  | -3.180186 |
| F | -4.750361 | 0.103680  | -1.725759 |
| F | -3.336479 | 1.699969  | -1.412278 |
| O | -0.219715 | -2.148721 | -0.831609 |
| C | -0.179242 | -0.947642 | -0.650606 |
| H | 3.914182  | 1.337781  | -0.436861 |
| C | 5.790951  | -1.309975 | 0.161720  |
| H | 6.162256  | -0.318426 | 0.417341  |
| H | 7.731673  | -2.219812 | 0.164189  |
| H | -2.713222 | -1.563819 | -1.353459 |
| C | -5.595248 | -3.732843 | -0.414930 |
| H | -6.037468 | -3.306148 | -1.326185 |
| H | -5.138261 | -4.702286 | -0.640077 |
| H | -6.394369 | -3.859249 | 0.328949  |
| C | -4.933117 | -1.636949 | 0.436302  |
| O | -4.562746 | -2.904406 | 0.083166  |
| O | -6.083492 | -1.271833 | 0.297130  |
| C | -3.845965 | 0.490325  | 1.335653  |
| O | -4.700070 | 1.359676  | 1.156511  |
| C | -3.805089 | -0.895252 | 0.947060  |
| C | -1.828417 | -0.460454 | 2.162873  |
| C | -0.610848 | -0.481199 | 2.845353  |
| C | -2.540469 | 0.736411  | 2.036683  |
| C | -0.131169 | 0.709869  | 3.396628  |
| H | -0.052185 | -1.412354 | 2.967598  |
| C | -2.046631 | 1.935617  | 2.550870  |
| C | -0.831416 | 1.915505  | 3.237900  |
| H | 0.799745  | 0.698227  | 3.966904  |
| H | -2.620320 | 2.857093  | 2.431528  |
| H | -0.428854 | 2.834106  | 3.669935  |
| C | -2.602792 | -1.592814 | 1.540971  |
| H | -1.997749 | -2.150632 | 0.810103  |
| H | -2.888928 | -2.324128 | 2.317740  |

-----  
PCMopt/16\_TS\_SSe

Frequencies, energies and thermodynamic properties:

Lowest Vibrational Mode (1/cm) = -207.1501  
2nd Lowest Vibrational Mode (1/cm) = 15.4681  
E(RM062X) (a.u.) = -2420.01096777  
Thermal correction to Enthalpy (a.u.) = 0.633162  
Thermal correction to Gibbs Free Energy (a.u.) = 0.523053  
Total Entropy (cal/Kmol) = 231.744  
Esp(RM062X+D3) (a.u.) = -2422.42390223  
Esp(D3) (a.u.) = -0.0089931834  
Esp(RM062X) (a.u.) = -2422.4149090466

Optimised cartesian coordinates (Angstrom):

C 7.203750 -1.253118 0.542864  
C 7.076366 -2.454336 -0.169348  
C 5.848349 -2.848694 -0.691475  
C 4.751732 -2.012557 -0.484801  
C 4.880562 -0.822251 0.232960  
H 7.950718 -3.087680 -0.319844  
H 5.743877 -3.780437 -1.247689  
C 2.645437 -0.734483 -0.306305  
C 1.146443 1.117374 0.270125  
C 2.049315 1.236451 1.508964  
C 3.505755 1.090619 1.105777  
H 4.147796 1.002327 1.991771  
S 3.097973 -2.263380 -1.011605  
N 3.662240 -0.140822 0.329806  
N 1.432494 -0.169836 -0.404995  
C 1.782763 2.502900 2.354324  
C 2.614734 3.723245 1.947999  
C 1.994313 2.193589 3.837726  
H 0.718055 2.754123 2.217516  
H 3.676365 3.578035 2.201971  
H 2.544738 3.951293 0.875242  
H 2.266839 4.605882 2.502733  
H 1.323438 1.392273 4.177831  
H 3.031294 1.875689 4.029710  
H 1.801929 3.086286 4.449260  
H 1.785805 0.361646 2.126084  
H 0.123560 1.010683 0.652046

C 1.220977 2.285554 -0.688921  
C 0.278495 3.314244 -0.578698  
C 2.233024 2.388935 -1.649086  
C 0.366583 4.444805 -1.389048  
H -0.531109 3.230488 0.150797  
C 2.321513 3.519820 -2.461201  
H 2.959166 1.582407 -1.778581  
C 1.393804 4.553086 -2.327297  
H -0.372675 5.240807 -1.290879  
H 3.117035 3.590522 -3.204081  
H 1.463975 5.436665 -2.963030  
C -0.860232 -0.172742 -1.290569  
H -0.878190 0.915698 -1.311087  
C -2.018352 -0.893982 -1.413611  
C -3.190135 -0.252352 -2.099921  
F -2.937719 -0.131124 -3.413219  
F -4.314799 -0.960072 -2.003545  
F -3.443514 0.979908 -1.648653  
O 0.552609 -2.067323 -1.310836  
C 0.358138 -0.896824 -1.028850  
H 3.859305 1.939394 0.501407  
C 6.110530 -0.419301 0.755195  
H 6.219038 0.517211 1.301031  
H 8.177328 -0.961685 0.937327  
H -1.982929 -1.982192 -1.505016  
C -0.344665 -3.688166 1.332677  
H 0.463721 -3.348957 0.670022  
H -0.073487 -3.466545 2.373929  
H -0.505307 -4.764250 1.209102  
C -1.618094 -1.727658 1.139898  
O -1.569322 -3.062436 0.985351  
O -0.634896 -1.095472 1.512245  
C -4.135919 -1.786563 0.587434  
O -4.376528 -2.953973 0.310430  
C -2.856221 -1.103025 0.756348  
C -4.579747 0.480791 1.136201  
C -5.369880 1.607913 1.355410

C -5.181676 -0.732303 0.794216  
C -6.757306 1.490343 1.233095  
H -4.918303 2.566528 1.619125  
C -6.563038 -0.859252 0.669398  
C -7.353249 0.267674 0.894492  
H -7.388266 2.364567 1.403721  
H -7.000858 -1.822435 0.399069  
H -8.438932 0.203888 0.804980  
C -3.079737 0.321604 1.210948  
H -2.717680 0.478520 2.241375  
H -2.553551 1.065107 0.585887

-----  
PCMopt/16\_TS\_SSf

Frequencies, energies and thermodynamic properties:

Lowest Vibrational Mode (1/cm) = -190.2541  
2nd Lowest Vibrational Mode (1/cm) = 16.0223  
E(RM062X) (a.u.) = -2420.00674455  
Thermal correction to Enthalpy (a.u.) = 0.633041  
Thermal correction to Gibbs Free Energy (a.u.) = 0.523595  
Total Entropy (cal/Kmol) = 230.347  
Esp(RM062X+D3) (a.u.) = -2422.42190541  
Esp(D3) (a.u.) = -0.0092633757  
Esp(RM062X) (a.u.) = -2422.4126420343

Optimised cartesian coordinates (Angstrom):

C 7.241062 -0.942976 0.538187  
C 7.177291 -2.185647 -0.109065  
C 5.969881 -2.678773 -0.592738  
C 4.827886 -1.898622 -0.412762  
C 4.893425 -0.667184 0.240919  
H 8.086144 -2.773351 -0.238623  
H 5.915135 -3.642860 -1.098579  
C 2.652172 -0.743021 -0.267553  
C 1.044904 1.045564 0.235965  
C 1.969478 1.312677 1.436501  
C 3.422224 1.220055 1.005963  
H 4.085270 1.236839 1.880329  
S 3.188511 -2.270997 -0.907946



|   |           |           |           |
|---|-----------|-----------|-----------|
| N | 3.636795  | -0.055292 | 0.319273  |
| N | 1.398868  | -0.262191 | -0.366798 |
| C | 1.649202  | 2.623866  | 2.191960  |
| C | 2.397870  | 3.855019  | 1.671708  |
| C | 1.917551  | 2.441021  | 3.687171  |
| H | 0.568420  | 2.802513  | 2.069196  |
| H | 3.471990  | 3.789878  | 1.905268  |
| H | 2.288394  | 3.998609  | 0.587803  |
| H | 2.012125  | 4.754973  | 2.170604  |
| H | 1.304100  | 1.631945  | 4.107820  |
| H | 2.976173  | 2.198702  | 3.870749  |
| H | 1.688997  | 3.366005  | 4.234669  |
| H | 1.783425  | 0.480912  | 2.135070  |
| H | 0.035726  | 0.904958  | 0.646135  |
| C | 1.021367  | 2.155075  | -0.794056 |
| C | 0.019018  | 3.128713  | -0.718948 |
| C | 2.001660  | 2.258929  | -1.785917 |
| C | 0.017092  | 4.210073  | -1.598022 |
| H | -0.767531 | 3.041291  | 0.035239  |
| C | 2.000103  | 3.341395  | -2.666239 |
| H | 2.772931  | 1.491329  | -1.888333 |
| C | 1.013451  | 4.322556  | -2.568646 |
| H | -0.767971 | 4.963913  | -1.527582 |
| H | 2.771596  | 3.414249  | -3.433720 |
| H | 1.013316  | 5.167986  | -3.257803 |
| C | -0.868351 | -0.395386 | -1.303632 |
| H | -0.921498 | 0.689125  | -1.376625 |
| C | -1.998959 | -1.150607 | -1.425380 |
| C | -3.184145 | -0.526694 | -2.106830 |
| F | -2.940708 | -0.403331 | -3.421462 |
| F | -4.300247 | -1.243178 | -2.000850 |
| F | -3.440347 | 0.703476  | -1.651560 |
| O | 0.633769  | -2.222993 | -1.238817 |
| C | 0.378664  | -1.057746 | -0.998154 |
| H | 3.712203  | 2.039035  | 0.331049  |
| C | 6.103240  | -0.164840 | 0.723246  |
| H | 6.162763  | 0.803850  | 1.217865  |

|   |           |           |           |
|---|-----------|-----------|-----------|
| H | 8.200094  | -0.574586 | 0.902730  |
| H | -1.952250 | -2.241152 | -1.469265 |
| C | 0.418288  | -2.342091 | 1.948668  |
| H | 0.845864  | -2.857959 | 1.076184  |
| H | 1.160235  | -1.671185 | 2.397725  |
| H | 0.111267  | -3.097353 | 2.684158  |
| C | -1.778126 | -2.220594 | 1.108228  |
| O | -0.684163 | -1.536745 | 1.564718  |
| O | -1.736325 | -3.428540 | 0.976178  |
| C | -4.228150 | -1.819234 | 0.641983  |
| O | -4.638985 | -2.947883 | 0.401949  |
| C | -2.866459 | -1.328806 | 0.794024  |
| C | -4.337453 | 0.485568  | 1.196464  |
| C | -4.952558 | 1.713890  | 1.428663  |
| C | -5.110355 | -0.623323 | 0.845960  |
| C | -6.342841 | 1.802572  | 1.307833  |
| H | -4.365080 | 2.593508  | 1.700412  |
| C | -6.495040 | -0.545135 | 0.723304  |
| C | -7.111479 | 0.684266  | 0.958326  |
| H | -6.838508 | 2.758302  | 1.487866  |
| H | -7.069479 | -1.431877 | 0.447067  |
| H | -8.194786 | 0.781347  | 0.869445  |
| C | -2.874678 | 0.109281  | 1.253372  |
| H | -2.266497 | 0.771444  | 0.608019  |
| H | -2.474457 | 0.225469  | 2.274569  |

-----

PCMopt/9\_TS\_RRa

Frequencies, energies and thermodynamic properties:

|                                                  |                  |
|--------------------------------------------------|------------------|
| Lowest Vibrational Mode (1/cm) =                 | -114.5289        |
| 2nd Lowest Vibrational Mode (1/cm) =             | 22.5235          |
| E(RM062X) (a.u.) =                               | -2267.73676118   |
| Thermal correction to Enthalpy (a.u.) =          | 0.606596         |
| Thermal correction to Gibbs Free Energy (a.u.) = | 0.504423         |
| Total Entropy (cal/Kmol) =                       | 215.042          |
| Esp(RM062X+D3) (a.u.) =                          | -2269.99026814   |
| Esp(D3) (a.u.) =                                 | -0.0085298397    |
| Esp(RM062X) (a.u.) =                             | -2269.9817383003 |

Optimised cartesian coordinates (Angstrom):

C -6.126170 -2.092530 0.990029  
C -5.627385 -3.397833 0.872170  
C -4.340027 -3.631203 0.398571  
C -3.563077 -2.528012 0.046111  
C -4.067555 -1.230950 0.154599  
H -6.254133 -4.242662 1.158035  
H -3.946849 -4.643881 0.307814  
C -1.952224 -0.784431 -0.630235  
C -1.022652 1.464241 -0.891545  
C -2.474383 1.853298 -1.233883  
C -3.432031 1.156091 -0.283728  
H -4.468244 1.270220 -0.628277  
S -1.926483 -2.524746 -0.582690  
N -3.132816 -0.275847 -0.258837  
N -0.907528 -0.010025 -0.960618  
C -2.716383 3.379696 -1.307212  
C -3.145450 4.020275 0.016929  
C -3.746164 3.691871 -2.395131  
H -1.761698 3.837128 -1.613989  
H -4.166452 3.711344 0.290296  
H -2.474456 3.772752 0.851297  
H -3.156555 5.113743 -0.092687  
H -3.408213 3.339573 -3.379762  
H -4.711378 3.210380 -2.172432  
H -3.922154 4.774774 -2.459272  
H -2.653827 1.440880 -2.240124  
H -0.398029 1.850637 -1.706918  
C -0.528987 2.029744 0.423193  
C 0.161169 3.247065 0.418549  
C -0.818993 1.412634 1.643681  
C 0.509905 3.867402 1.617131  
H 0.419143 3.721283 -0.531836  
C -0.464976 2.030132 2.842747  
H -1.285704 0.426213 1.667811  
C 0.186084 3.264229 2.833193  
H 1.040778 4.820292 1.600325

H -0.695037 1.540695 3.790019  
H 0.458101 3.746363 3.773307  
C 1.531478 0.179087 -1.299679  
H 1.523062 1.215220 -0.969653  
C 2.699360 -0.473425 -1.510791  
C 3.977842 0.274352 -1.723153  
F 4.079853 0.654800 -3.008511  
F 4.058244 1.389402 -0.992009  
F 5.057579 -0.462387 -1.465959  
O 0.308861 -1.810688 -1.643663  
C 0.331715 -0.637523 -1.324446  
H -3.359073 1.547308 0.741847  
C -5.356035 -0.990068 0.634164  
H -5.745823 0.021983 0.736816  
H -7.135613 -1.934043 1.369858  
H 2.703656 -1.498201 -1.883366  
C 3.751622 1.848441 2.044220  
H 4.462693 2.236047 1.301335  
H 2.962063 2.584971 2.229350  
H 4.299845 1.642592 2.974633  
C 3.917782 -0.355784 1.274357  
O 3.106458 0.686239 1.563160  
O 5.123772 -0.275884 1.452001  
C 4.028518 -2.780531 0.486999  
C 1.854653 -1.830720 0.935235  
C 2.952985 -3.779054 0.019189  
H 4.820906 -2.631540 -0.262232  
C 1.686449 -3.345029 0.757415  
H 3.232796 -4.825807 0.200983  
H 1.642153 -3.792450 1.766695  
C 3.239730 -1.523331 0.760125  
O 0.907681 -1.066175 1.158829  
H 4.530024 -3.145661 1.403691  
H 2.792131 -3.664798 -1.064775  
H 0.745950 -3.581376 0.243296

-----  
PCMopt/9\_TS\_RRb

Frequencies, energies and thermodynamic properties:

|                                                  |                  |
|--------------------------------------------------|------------------|
| Lowest Vibrational Mode (1/cm) =                 | -137.8402        |
| 2nd Lowest Vibrational Mode (1/cm) =             | 27.6133          |
| E(RM062X) (a.u.) =                               | -2267.73622347   |
| Thermal correction to Enthalpy (a.u.) =          | 0.606491         |
| Thermal correction to Gibbs Free Energy (a.u.) = | 0.504522         |
| Total Entropy (cal/Kmol) =                       | 214.611          |
| Esp(RM062X+D3) (a.u.) =                          | -2269.98877910   |
| Esp(D3) (a.u.) =                                 | -0.0083123461    |
| Esp(RM062X) (a.u.) =                             | -2269.9804667539 |

Optimised cartesian coordinates (Angstrom):

|   |           |           |           |
|---|-----------|-----------|-----------|
| C | -6.126234 | -2.170965 | 1.019341  |
| C | -5.598138 | -3.463754 | 0.893245  |
| C | -4.309035 | -3.665559 | 0.409448  |
| C | -3.559722 | -2.543755 | 0.056366  |
| C | -4.093424 | -1.258863 | 0.173906  |
| H | -6.203075 | -4.323957 | 1.180258  |
| H | -3.893425 | -4.668623 | 0.311933  |
| C | -1.994964 | -0.761657 | -0.624361 |
| C | -1.108965 | 1.505365  | -0.847593 |
| C | -2.565622 | 1.875917  | -1.188359 |
| C | -3.515346 | 1.144923  | -0.254934 |
| H | -4.551246 | 1.239252  | -0.606679 |
| S | -1.929704 | -2.500726 | -0.588386 |
| N | -3.184198 | -0.280578 | -0.242210 |
| N | -0.968285 | 0.035960  | -0.949452 |
| C | -2.829200 | 3.399688  | -1.235327 |
| C | -3.263246 | 4.012908  | 0.099925  |
| C | -3.864530 | 3.716994  | -2.316408 |
| H | -1.880584 | 3.874331  | -1.535407 |
| H | -4.278259 | 3.683975  | 0.372219  |
| H | -2.584901 | 3.762945  | 0.927607  |
| H | -3.291635 | 5.107618  | 0.007091  |
| H | -3.524821 | 3.383407  | -3.306932 |
| H | -4.823949 | 3.221665  | -2.099210 |
| H | -4.052526 | 4.798749  | -2.363892 |
| H | -2.733910 | 1.479465  | -2.202885 |

H -0.486307 1.919429 -1.650749  
C -0.627334 2.051567 0.479898  
C 0.078388 3.259454 0.495918  
C -0.931008 1.421545 1.690909  
C 0.441873 3.851359 1.704493  
H 0.344302 3.744749 -0.446765  
C -0.571039 2.015319 2.900100  
H -1.418136 0.444507 1.700815  
C 0.106639 3.235112 2.910309  
H 0.990085 4.794345 1.703219  
H -0.813558 1.516443 3.839299  
H 0.387855 3.696475 3.857954  
C 1.468335 0.256391 -1.276350  
H 1.450831 1.276168 -0.898894  
C 2.642797 -0.385172 -1.503090  
C 3.915194 0.376205 -1.711634  
F 3.986867 0.802641 -2.984935  
F 4.009992 1.463777 -0.943149  
F 5.004419 -0.363529 -1.506033  
O 0.255965 -1.719017 -1.731791  
C 0.276344 -0.564802 -1.347903  
H -3.460613 1.526152 0.775570  
C -5.383857 -1.049692 0.662571  
H -5.796177 -0.047127 0.770637  
H -7.136636 -2.037149 1.406068  
H 2.646308 -1.390812 -1.925015  
C 5.573253 1.010874 1.834826  
H 5.234734 1.227101 2.858095  
H 6.659998 0.873321 1.823843  
H 5.294791 1.856852 1.191010  
C 3.648561 -0.220415 1.279098  
O 5.008905 -0.191168 1.351591  
O 2.988909 0.728636 1.659543  
C 4.058071 -2.650831 0.428549  
C 1.809091 -1.876009 0.842179  
C 3.070818 -3.703537 -0.113492  
H 4.866576 -2.429312 -0.282484

|   |          |           |           |
|---|----------|-----------|-----------|
| C | 1.744922 | -3.384569 | 0.580193  |
| H | 3.415213 | -4.733780 | 0.050265  |
| H | 1.675977 | -3.888006 | 1.561010  |
| C | 3.172000 | -1.460132 | 0.709896  |
| O | 0.816658 | -1.184041 | 1.092663  |
| H | 4.544127 | -3.014492 | 1.353591  |
| H | 2.951951 | -3.568023 | -1.200352 |
| H | 0.846932 | -3.646467 | 0.005274  |

-----

PCMopt/9\_TS\_RRc

Frequencies, energies and thermodynamic properties:

|                                                  |                  |
|--------------------------------------------------|------------------|
| Lowest Vibrational Mode (1/cm) =                 | -144.6298        |
| 2nd Lowest Vibrational Mode (1/cm) =             | 23.7695          |
| E(RM062X) (a.u.) =                               | -2267.73354867   |
| Thermal correction to Enthalpy (a.u.) =          | 0.606470         |
| Thermal correction to Gibbs Free Energy (a.u.) = | 0.503394         |
| Total Entropy (cal/Kmol) =                       | 216.942          |
| Esp(RM062X+D3) (a.u.) =                          | -2269.98751993   |
| Esp(D3) (a.u.) =                                 | -0.0086439469    |
| Esp(RM062X) (a.u.) =                             | -2269.9788759831 |

Optimised cartesian coordinates (Angstrom):

|   |           |           |           |
|---|-----------|-----------|-----------|
| C | -6.159311 | -1.951090 | 1.081109  |
| C | -5.741696 | -3.257001 | 0.785714  |
| C | -4.503806 | -3.495582 | 0.197564  |
| C | -3.694317 | -2.396545 | -0.089645 |
| C | -4.117951 | -1.097797 | 0.196150  |
| H | -6.393260 | -4.098208 | 1.022620  |
| H | -4.172341 | -4.508796 | -0.030532 |
| C | -2.037813 | -0.666631 | -0.688121 |
| C | -1.032071 | 1.564937  | -0.848793 |
| C | -2.491185 | 2.029524  | -1.010139 |
| C | -3.379705 | 1.289995  | -0.027003 |
| H | -4.438297 | 1.486321  | -0.240353 |
| S | -2.102437 | -2.400070 | -0.821195 |
| N | -3.160504 | -0.148398 | -0.176609 |
| N | -0.980478 | 0.092497  | -1.022897 |
| C | -2.671676 | 3.564188  | -0.938390 |

|   |           |           |           |
|---|-----------|-----------|-----------|
| C | -2.929687 | 4.107838  | 0.470660  |
| C | -3.796854 | 3.999353  | -1.879567 |
| H | -1.735705 | 4.011219  | -1.310917 |
| H | -3.927246 | 3.810534  | 0.830055  |
| H | -2.183473 | 3.771354  | 1.203730  |
| H | -2.908169 | 5.206390  | 0.448188  |
| H | -3.580352 | 3.718897  | -2.919879 |
| H | -4.752174 | 3.532997  | -1.591449 |
| H | -3.933536 | 5.088995  | -1.838348 |
| H | -2.788394 | 1.707923  | -2.021674 |
| H | -0.484368 | 1.984983  | -1.701811 |
| C | -0.371940 | 2.020182  | 0.435552  |
| C | 0.384207  | 3.197518  | 0.428046  |
| C | -0.547298 | 1.325962  | 1.635394  |
| C | 0.925201  | 3.697264  | 1.611183  |
| H | 0.552245  | 3.730015  | -0.511798 |
| C | -0.014117 | 1.831606  | 2.820683  |
| H | -1.068780 | 0.367073  | 1.649427  |
| C | 0.715628  | 3.020030  | 2.813352  |
| H | 1.512487  | 4.616341  | 1.593396  |
| H | -0.156677 | 1.283209  | 3.752916  |
| H | 1.135874  | 3.409718  | 3.741675  |
| C | 1.441719  | 0.236787  | -1.438303 |
| H | 1.420395  | 1.309141  | -1.267543 |
| C | 2.639020  | -0.401466 | -1.491628 |
| C | 3.864927  | 0.416165  | -1.772745 |
| F | 4.045593  | 0.512617  | -3.100171 |
| F | 3.753005  | 1.667905  | -1.312115 |
| F | 4.994366  | -0.091173 | -1.281913 |
| O | 0.153487  | -1.704147 | -1.852537 |
| C | 0.224470  | -0.553331 | -1.471547 |
| H | -3.173480 | 1.572846  | 1.016096  |
| C | -5.356124 | -0.852731 | 0.792649  |
| H | -5.682793 | 0.157743  | 1.035282  |
| H | -7.130569 | -1.789310 | 1.548918  |
| H | 2.716475  | -1.467354 | -1.714282 |
| C | 1.035960  | -3.951991 | 0.253888  |



|   |          |           |           |
|---|----------|-----------|-----------|
| H | 0.412627 | -3.667101 | -0.603693 |
| H | 1.433725 | -4.962881 | 0.108240  |
| H | 0.419392 | -3.919588 | 1.163247  |
| C | 1.917205 | -1.831325 | 0.790615  |
| O | 2.154627 | -3.094130 | 0.362003  |
| O | 0.771355 | -1.440918 | 1.003914  |
| C | 2.945929 | 0.331170  | 1.586691  |
| C | 4.446089 | -1.485722 | 0.993514  |
| C | 4.394017 | 0.852352  | 1.705110  |
| H | 2.288474 | 1.021538  | 1.026467  |
| C | 5.272378 | -0.401498 | 1.697745  |
| H | 4.541106 | 1.474332  | 2.599078  |
| H | 5.468115 | -0.769404 | 2.719919  |
| C | 3.081943 | -1.008747 | 0.915612  |
| O | 4.930719 | -2.550571 | 0.626970  |
| H | 2.473885 | 0.228839  | 2.581460  |
| H | 4.635730 | 1.476221  | 0.834476  |
| H | 6.247899 | -0.278050 | 1.205650  |

-----  
 PCMopt/9\_TS\_RSa

Frequencies, energies and thermodynamic properties:

|                                                  |                  |
|--------------------------------------------------|------------------|
| Lowest Vibrational Mode (1/cm) =                 | -135.6927        |
| 2nd Lowest Vibrational Mode (1/cm) =             | 20.0079          |
| E(RM062X) (a.u.) =                               | -2267.72907895   |
| Thermal correction to Enthalpy (a.u.) =          | 0.606457         |
| Thermal correction to Gibbs Free Energy (a.u.) = | 0.502126         |
| Total Entropy (cal/Kmol) =                       | 219.583          |
| Esp(RM062X+D3) (a.u.) =                          | -2269.98578474   |
| Esp(D3) (a.u.) =                                 | -0.0081704581    |
| Esp(RM062X) (a.u.) =                             | -2269.9776142819 |

Optimised cartesian coordinates (Angstrom):

|   |           |           |          |
|---|-----------|-----------|----------|
| C | -6.140842 | -2.648210 | 0.785517 |
| C | -5.506475 | -3.898987 | 0.810304 |
| C | -4.161842 | -4.025949 | 0.477234 |
| C | -3.466015 | -2.870947 | 0.120676 |
| C | -4.103546 | -1.629922 | 0.087746 |
| H | -6.072868 | -4.784935 | 1.097616 |

H -3.663728 -4.995347 0.497565  
C -1.973733 -1.012642 -0.520557  
C -1.253459 1.305132 -0.837584  
C -2.688514 1.511561 -1.360706  
C -3.671718 0.776348 -0.468249  
H -4.667293 0.748888 -0.930029  
S -1.785062 -2.735445 -0.355958  
N -3.229418 -0.609008 -0.301627  
N -0.975557 -0.149374 -0.789179  
C -3.072003 2.995071 -1.575883  
C -3.714854 3.668763 -0.359263  
C -3.993750 3.122853 -2.790652  
H -2.138816 3.532522 -1.810705  
H -4.724885 3.269729 -0.177253  
H -3.125357 3.549037 0.560440  
H -3.821879 4.745370 -0.551838  
H -3.508984 2.747287 -3.702659  
H -4.924842 2.554299 -2.639142  
H -4.269189 4.173858 -2.955582  
H -2.708592 1.018403 -2.346101  
H -0.584367 1.711952 -1.605396  
C -0.976843 1.994672 0.481241  
C -0.414990 3.276313 0.468029  
C -1.352942 1.427184 1.703368  
C -0.277187 4.001013 1.651157  
H -0.092045 3.717034 -0.478302  
C -1.217860 2.152902 2.886531  
H -1.744481 0.408319 1.747592  
C -0.691850 3.445160 2.861815  
H 0.157607 5.000996 1.626295  
H -1.519170 1.702247 3.833039  
H -0.588622 4.011349 3.788435  
C 1.436531 0.282772 -1.074845  
H 1.301397 1.307614 -0.731264  
C 2.673731 -0.186021 -1.381219  
C 3.799268 0.772880 -1.621322  
F 3.603047 1.448836 -2.768961

|   |           |           |           |
|---|-----------|-----------|-----------|
| F | 3.911015  | 1.686581  | -0.660695 |
| F | 4.975617  | 0.156428  | -1.754712 |
| O | 0.439611  | -1.855490 | -1.280859 |
| C | 0.338883  | -0.665338 | -1.060972 |
| H | -3.760274 | 1.237787  | 0.526380  |
| C | -5.451510 | -1.495464 | 0.424473  |
| H | -5.947250 | -0.525544 | 0.416156  |
| H | -7.194074 | -2.573443 | 1.056506  |
| H | 2.794095  | -1.183540 | -1.804615 |
| C | 2.116345  | 1.410579  | 2.647590  |
| H | 1.593513  | 0.863301  | 3.445989  |
| H | 2.646198  | 2.271387  | 3.071947  |
| H | 1.365056  | 1.755899  | 1.924350  |
| C | 2.639587  | -0.531414 | 1.441643  |
| O | 3.091667  | 0.606787  | 2.018637  |
| O | 1.452681  | -0.836673 | 1.522322  |
| C | 3.362915  | -2.671605 | 0.231791  |
| C | 5.054534  | -1.015311 | 0.733812  |
| C | 4.617510  | -3.002716 | -0.596353 |
| H | 3.286186  | -3.366466 | 1.090565  |
| C | 5.738552  | -2.237067 | 0.104064  |
| H | 4.497833  | -2.612817 | -1.620016 |
| H | 6.567485  | -1.923608 | -0.546184 |
| C | 3.625086  | -1.255710 | 0.699486  |
| O | 5.689333  | -0.065256 | 1.175274  |
| H | 2.433862  | -2.774383 | -0.343680 |
| H | 4.805109  | -4.082216 | -0.677065 |
| H | 6.172684  | -2.826153 | 0.931014  |

-----  
PCMopt/9\_TS\_RSb

Frequencies, energies and thermodynamic properties:

|                                                  |                |
|--------------------------------------------------|----------------|
| Lowest Vibrational Mode (1/cm) =                 | -166.1426      |
| 2nd Lowest Vibrational Mode (1/cm) =             | 21.6680        |
| E(RM062X) (a.u.) =                               | -2267.73017307 |
| Thermal correction to Enthalpy (a.u.) =          | 0.606636       |
| Thermal correction to Gibbs Free Energy (a.u.) = | 0.502151       |
| Total Entropy (cal/Kmol) =                       | 219.907        |

Esp(RM062X+D3) (a.u.) = -2269.98403601

Esp(D3) (a.u.) = -0.0081429491

Esp(RM062X) (a.u.) = -2269.9758930609

Optimised cartesian coordinates (Angstrom):

C 6.196882 2.622942 0.844329  
C 5.582029 3.883010 0.815171  
C 4.249166 4.019203 0.439951  
C 3.545780 2.865465 0.094798  
C 4.164424 1.614983 0.115628  
H 6.153615 4.768560 1.093378  
H 3.765333 4.995923 0.419230  
C 2.042323 1.011659 -0.541921  
C 1.298488 -1.297088 -0.835332  
C 2.752024 -1.547393 -1.282002  
C 3.710825 -0.799478 -0.374651  
H 4.724426 -0.805065 -0.796590  
S 1.872775 2.741987 -0.416135  
N 3.286427 0.596641 -0.271355  
N 1.044815 0.160458 -0.833806  
C 3.112146 -3.044876 -1.428416  
C 3.676546 -3.690602 -0.158882  
C 4.090975 -3.234136 -2.589261  
H 2.179423 -3.569956 -1.692078  
H 4.684074 -3.305707 0.063148  
H 3.042726 -3.528497 0.724106  
H 3.770352 -4.774920 -0.311097  
H 3.661653 -2.881023 -3.537316  
H 5.025431 -2.679518 -2.409424  
H 4.351461 -4.295618 -2.704043  
H 2.825864 -1.089991 -2.282086  
H 0.668288 -1.713402 -1.629206  
C 0.937660 -1.947988 0.483073  
C 0.325778 -3.205932 0.473430  
C 1.292634 -1.371458 1.707727  
C 0.119354 -3.902258 1.664076  
H 0.020251 -3.653257 -0.475839  
C 1.094442 -2.070808 2.897661

H 1.717741 -0.366089 1.747353  
C 0.519687 -3.342382 2.877606  
H -0.353678 -4.884885 1.642124  
H 1.383455 -1.615447 3.845730  
H 0.366207 -3.887756 3.809721  
C -1.362297 -0.244570 -1.214200  
H -1.211612 -1.319673 -1.146782  
C -2.628363 0.267004 -1.280825  
C -3.746996 -0.543763 -1.854824  
F -3.608359 -0.645999 -3.188576  
F -3.785712 -1.794968 -1.386424  
F -4.945154 0.007222 -1.650120  
O -0.349933 1.895647 -1.287156  
C -0.270631 0.694237 -1.113091  
H 3.751477 -1.229932 0.636894  
C 5.499661 1.470563 0.496163  
H 5.980661 0.493800 0.530059  
H 7.240657 2.540024 1.147755  
H -2.744733 1.348812 -1.376189  
C -6.110788 3.068299 0.259389  
H -5.839807 3.345602 -0.769305  
H -7.193065 2.918682 0.333445  
H -5.798084 3.881236 0.929393  
C -4.150702 1.811938 0.584188  
O -5.507829 1.842986 0.627343  
O -3.521978 2.810784 0.282572  
C -4.580900 -0.617160 1.323515  
C -2.345447 0.276088 1.507322  
C -3.644095 -1.766616 1.734667  
H -5.199200 -0.291277 2.180043  
C -2.375093 -1.072265 2.225752  
H -3.406563 -2.375740 0.851180  
H -1.445233 -1.621476 2.027586  
C -3.638712 0.493027 0.902540  
O -1.333147 0.967929 1.452360  
H -5.285722 -0.910979 0.532572  
H -4.095069 -2.431077 2.484257

H -2.408102 -0.865773 3.309923

-----  
PCMopt/9\_TS\_RSc

Frequencies, energies and thermodynamic properties:

Lowest Vibrational Mode (1/cm) = -94.2717  
2nd Lowest Vibrational Mode (1/cm) = 25.7250  
E(RM062X) (a.u.) = -2267.73152342  
Thermal correction to Enthalpy (a.u.) = 0.606938  
Thermal correction to Gibbs Free Energy (a.u.) = 0.504652  
Total Entropy (cal/Kmol) = 215.279  
Esp(RM062X+D3) (a.u.) = -2269.98579954  
Esp(D3) (a.u.) = -0.0082142749  
Esp(RM062X) (a.u.) = -2269.9775852651

Optimised cartesian coordinates (Angstrom):

C -6.290853 -2.094192 0.720829  
C -5.813408 -3.395385 0.504213  
C -4.513006 -3.615632 0.062719  
C -3.701808 -2.502390 -0.157650  
C -4.182894 -1.209433 0.050748  
H -6.468192 -4.247363 0.687631  
H -4.135741 -4.624841 -0.103051  
C -2.026635 -0.742985 -0.602658  
C -1.069549 1.513240 -0.708228  
C -2.512068 1.923570 -1.062755  
C -3.488098 1.190338 -0.162221  
H -4.519742 1.341541 -0.504639  
S -2.041029 -2.479474 -0.713135  
N -3.210652 -0.244169 -0.232717  
N -0.952238 0.038640 -0.829242  
C -2.750417 3.452149 -1.076388  
C -3.212850 4.033627 0.263767  
C -3.754682 3.810276 -2.174058  
H -1.789939 3.922577 -1.341393  
H -4.240913 3.714686 0.495938  
H -2.564414 3.747635 1.103521  
H -3.220141 5.130908 0.203417  
H -3.392331 3.501913 -3.164705

H -4.723946 3.318377 -1.996065  
H -3.931386 4.894719 -2.194725  
H -2.674436 1.554511 -2.088649  
H -0.432731 1.930372 -1.497698  
C -0.597365 2.022028 0.636069  
C 0.058635 3.256535 0.699427  
C -0.870174 1.330731 1.819996  
C 0.393170 3.816270 1.930797  
H 0.304458 3.789171 -0.222562  
C -0.535524 1.891085 3.052802  
H -1.326931 0.338870 1.790806  
C 0.085448 3.138872 3.111381  
H 0.899471 4.781654 1.967718  
H -0.755955 1.345514 3.971147  
H 0.345061 3.575443 4.076710  
C 1.480155 0.265998 -1.207752  
H 1.450895 1.311954 -0.912157  
C 2.661456 -0.321061 -1.503836  
C 3.847849 0.521033 -1.859115  
F 3.808251 0.827413 -3.167299  
F 3.878959 1.679222 -1.197829  
F 5.016144 -0.091777 -1.660072  
O 0.275214 -1.743894 -1.532162  
C 0.291355 -0.575703 -1.201619  
H -3.414900 1.514347 0.886540  
C -5.485618 -0.982397 0.498751  
H -5.859665 0.024517 0.679678  
H -7.311752 -1.947481 1.073719  
H 2.708678 -1.362964 -1.826954  
C 1.115958 -3.883890 0.775296  
H 0.398919 -3.593896 -0.003265  
H 1.367180 -4.946002 0.673994  
H 0.658427 -3.701114 1.758215  
C 2.281217 -1.830690 0.914195  
O 2.323722 -3.167799 0.630786  
O 1.224549 -1.295777 1.227979  
C 4.819033 -2.017566 0.485922

C 3.870759 0.086414 1.279264  
C 5.991222 -1.107610 0.943390  
H 4.818622 -2.972389 1.034371  
C 5.393577 0.272044 1.252227  
H 6.779565 -1.052543 0.180581  
H 5.630047 1.024204 0.483803  
C 3.567660 -1.221589 0.765028  
O 3.109816 0.962567 1.682458  
H 4.913890 -2.283495 -0.580888  
H 6.453502 -1.528147 1.847928  
H 5.719222 0.690986 2.215966

-----  
PCMopt/9\_TS\_RSd

Frequencies, energies and thermodynamic properties:

Lowest Vibrational Mode (1/cm) = -137.8400  
2nd Lowest Vibrational Mode (1/cm) = 15.4067  
E(RM062X) (a.u.) = -2267.72418929  
Thermal correction to Enthalpy (a.u.) = 0.606374  
Thermal correction to Gibbs Free Energy (a.u.) = 0.500402  
Total Entropy (cal/Kmol) = 223.036  
Esp(RM062X+D3) (a.u.) = -2269.98111292  
Esp(D3) (a.u.) = -0.0082574662  
Esp(RM062X) (a.u.) = -2269.9728554538

Optimised cartesian coordinates (Angstrom):

C -6.194196 -2.682355 0.765925  
C -5.566203 -3.934026 0.683965  
C -4.235369 -4.042317 0.294567  
C -3.547557 -2.867845 -0.010607  
C -4.178721 -1.625354 0.062309  
H -6.126603 -4.835516 0.931932  
H -3.741777 -5.012262 0.232824  
C -2.070046 -0.977074 -0.585494  
C -1.350735 1.357517 -0.826988  
C -2.813950 1.594436 -1.242186  
C -3.746214 0.814070 -0.334380  
H -4.770256 0.828026 -0.729368  
S -1.881553 -2.706717 -0.528546



|   |           |           |           |
|---|-----------|-----------|-----------|
| N | -3.313014 | -0.583632 | -0.290175 |
| N | -1.077545 | -0.101804 | -0.842747 |
| C | -3.193704 | 3.090370  | -1.348856 |
| C | -3.726748 | 3.704624  | -0.050702 |
| C | -4.208022 | 3.290208  | -2.476896 |
| H | -2.274326 | 3.630130  | -1.629415 |
| H | -4.720570 | 3.300228  | 0.196880  |
| H | -3.061950 | 3.537865  | 0.808117  |
| H | -3.842089 | 4.789663  | -0.180825 |
| H | -3.803148 | 2.959377  | -3.443478 |
| H | -5.131326 | 2.722718  | -2.280620 |
| H | -4.482261 | 4.350787  | -2.563750 |
| H | -2.901407 | 1.158336  | -2.250616 |
| H | -0.739696 | 1.784128  | -1.631540 |
| C | -0.953731 | 1.998013  | 0.486535  |
| C | -0.313208 | 3.242014  | 0.468455  |
| C | -1.262765 | 1.407622  | 1.715997  |
| C | -0.013992 | 3.900859  | 1.659659  |
| H | -0.048841 | 3.702411  | -0.487133 |
| C | -0.959767 | 2.064288  | 2.908529  |
| H | -1.733118 | 0.421588  | 1.758933  |
| C | -0.342625 | 3.314925  | 2.882417  |
| H | 0.482631  | 4.871519  | 1.631784  |
| H | -1.203623 | 1.592647  | 3.861351  |
| H | -0.106232 | 3.827071  | 3.816054  |
| C | 1.330654  | 0.356449  | -1.079246 |
| H | 1.133016  | 1.412719  | -0.915351 |
| C | 2.617979  | -0.060756 | -1.191249 |
| C | 3.646757  | 0.991957  | -1.498698 |
| F | 3.497952  | 1.413397  | -2.766455 |
| F | 3.507188  | 2.073668  | -0.724639 |
| F | 4.903275  | 0.572022  | -1.393309 |
| O | 0.359361  | -1.786245 | -1.371090 |
| C | 0.243756  | -0.607111 | -1.122168 |
| H | -3.761877 | 1.211115  | 0.691379  |
| C | -5.512654 | -1.510061 | 0.457488  |
| H | -6.003918 | -0.540777 | 0.532552  |

|   |           |           |           |
|---|-----------|-----------|-----------|
| H | -7.236366 | -2.622687 | 1.079940  |
| H | 2.883241  | -1.100434 | -1.395910 |
| C | 5.959070  | -2.815990 | -0.953442 |
| H | 6.656041  | -3.195550 | -0.193341 |
| H | 5.630865  | -3.635690 | -1.601718 |
| H | 6.481841  | -2.053956 | -1.549556 |
| C | 4.997113  | -1.257381 | 0.513466  |
| O | 4.794132  | -2.279699 | -0.359217 |
| O | 6.128591  | -0.865128 | 0.752760  |
| C | 3.847719  | 0.534653  | 1.920908  |
| C | 2.563765  | -1.411196 | 1.278100  |
| C | 2.362368  | 0.845874  | 2.197095  |
| H | 4.387794  | 0.330185  | 2.865849  |
| C | 1.660186  | -0.512356 | 2.128528  |
| H | 1.973200  | 1.502311  | 1.403034  |
| H | 0.651414  | -0.478031 | 1.685523  |
| C | 3.785093  | -0.692930 | 1.045807  |
| O | 2.217644  | -2.532755 | 0.914213  |
| H | 4.369980  | 1.378686  | 1.444938  |
| H | 2.205318  | 1.366245  | 3.152139  |
| H | 1.553719  | -0.985249 | 3.119870  |

-----  
PCMopt/9\_TS\_RSe

Frequencies, energies and thermodynamic properties:

|                                                  |                  |
|--------------------------------------------------|------------------|
| Lowest Vibrational Mode (1/cm) =                 | -53.0749         |
| 2nd Lowest Vibrational Mode (1/cm) =             | 25.4660          |
| E(RM062X) (a.u.) =                               | -2267.72832192   |
| Thermal correction to Enthalpy (a.u.) =          | 0.606431         |
| Thermal correction to Gibbs Free Energy (a.u.) = | 0.503724         |
| Total Entropy (cal/Kmol) =                       | 216.165          |
| Esp(RM062X+D3) (a.u.) =                          | -2269.98302236   |
| Esp(D3) (a.u.) =                                 | -0.0083855496    |
| Esp(RM062X) (a.u.) =                             | -2269.9746368104 |

Optimised cartesian coordinates (Angstrom):

|   |           |           |          |
|---|-----------|-----------|----------|
| C | -6.526153 | -1.734921 | 0.573094 |
| C | -6.139881 | -3.077769 | 0.443022 |
| C | -4.836983 | -3.416769 | 0.095622 |

C -3.929123 -2.379312 -0.120943  
C -4.319558 -1.045530 -0.000061  
H -6.869837 -3.867769 0.619829  
H -4.530746 -4.458291 -0.003036  
C -2.102636 -0.774283 -0.547711  
C -0.974405 1.401999 -0.702785  
C -2.362017 1.908339 -1.136776  
C -3.435413 1.283181 -0.267653  
H -4.433692 1.492896 -0.672158  
S -2.239687 -2.509444 -0.561219  
N -3.261413 -0.170404 -0.268079  
N -0.961768 -0.081978 -0.768456  
C -2.468013 3.450405 -1.203085  
C -2.924961 4.111890 0.101082  
C -3.394585 3.859584 -2.349915  
H -1.459636 3.826514 -1.440965  
H -3.983481 3.888160 0.306148  
H -2.329891 3.800474 0.970754  
H -2.837487 5.203342 0.007037  
H -3.024702 3.488315 -3.315931  
H -4.410029 3.461475 -2.196494  
H -3.472640 4.954135 -2.409297  
H -2.505111 1.522546 -2.159251  
H -0.280998 1.744441 -1.478066  
C -0.511058 1.910010 0.644195  
C 0.292871 3.050757 0.697426  
C -0.932124 1.313684 1.836579  
C 0.638981 3.614191 1.922645  
H 0.651146 3.505637 -0.229552  
C -0.582766 1.874459 3.064300  
H -1.534468 0.401379 1.823304  
C 0.194158 3.032093 3.109033  
H 1.265213 4.507005 1.951146  
H -0.919498 1.403624 3.988893  
H 0.463969 3.471910 4.070291  
C 1.474967 -0.035497 -1.240104  
H 1.523374 1.040475 -1.096290

|   |           |           |           |
|---|-----------|-----------|-----------|
| C | 2.583819  | -0.735874 | -1.548018 |
| C | 3.795190  | -0.060231 | -2.107603 |
| F | 3.607956  | 0.206203  | -3.412722 |
| F | 4.069019  | 1.108087  | -1.523732 |
| F | 4.885156  | -0.825170 | -2.039924 |
| O | 0.164074  | -2.002856 | -1.199327 |
| C | 0.240024  | -0.799797 | -1.060933 |
| H | -3.395039 | 1.641780  | 0.771510  |
| C | -5.625023 | -0.699189 | 0.354874  |
| H | -5.929379 | 0.340578  | 0.467035  |
| H | -7.551996 | -1.495001 | 0.853075  |
| H | 2.547782  | -1.818913 | -1.679403 |
| C | 0.664294  | -2.784846 | 1.655287  |
| H | 1.011676  | -3.395698 | 2.501411  |
| H | -0.285276 | -2.299189 | 1.913494  |
| H | 0.518821  | -3.439455 | 0.785130  |
| C | 2.838109  | -2.151587 | 1.049290  |
| O | 1.579183  | -1.747997 | 1.368534  |
| O | 3.096329  | -3.347878 | 0.970145  |
| C | 5.256328  | -1.421139 | 0.831428  |
| C | 3.571064  | 0.293451  | 1.165133  |
| C | 5.953472  | -0.045049 | 0.751644  |
| H | 5.558067  | -1.965570 | 1.746979  |
| C | 4.948495  | 0.952994  | 1.332208  |
| H | 6.148073  | 0.203171  | -0.300381 |
| H | 4.964618  | 1.944784  | 0.857749  |
| C | 3.783723  | -1.089782 | 0.864815  |
| O | 2.517445  | 0.920792  | 1.293075  |
| H | 5.536754  | -2.067931 | -0.014537 |
| H | 6.920626  | -0.035905 | 1.273501  |
| H | 5.100829  | 1.107533  | 2.414762  |

-----

PCMopt/9\_TS\_SRa

Frequencies, energies and thermodynamic properties:

|                                      |                |
|--------------------------------------|----------------|
| Lowest Vibrational Mode (1/cm) =     | -260.6584      |
| 2nd Lowest Vibrational Mode (1/cm) = | 21.6558        |
| E(RM062X) (a.u.) =                   | -2267.74320818 |

Thermal correction to Enthalpy (a.u.) = 0.607190  
Thermal correction to Gibbs Free Energy (a.u.) = 0.504287  
Total Entropy (cal/Kmol) = 216.577  
Esp(RM062X+D3) (a.u.) = -2269.99037720  
Esp(D3) (a.u.) = -0.0084854507  
Esp(RM062X) (a.u.) = -2269.9818917493

Optimised cartesian coordinates (Angstrom):

C 6.677077 -1.100593 0.176128  
C 6.567545 -2.261430 -0.601538  
C 5.332776 -2.680199 -1.089637  
C 4.212351 -1.909335 -0.784155  
C 4.324029 -0.758210 -0.001371  
H 7.459826 -2.844111 -0.830934  
H 5.242610 -3.581977 -1.695699  
C 2.063622 -0.736746 -0.436827  
C 0.525770 1.016603 0.297740  
C 1.461684 1.090325 1.513254  
C 2.911232 1.026869 1.064334  
H 3.582994 0.895038 1.922991  
S 2.544666 -2.208409 -1.243480  
N 3.085220 -0.138269 0.193132  
N 0.833392 -0.220563 -0.460035  
C 1.161198 2.284177 2.446512  
C 1.918925 3.568809 2.098313  
C 1.431708 1.893067 3.900691  
H 0.080813 2.484127 2.350759  
H 2.994880 3.460300 2.307710  
H 1.800191 3.862130 1.045802  
H 1.549407 4.395167 2.721879  
H 0.812045 1.037702 4.204871  
H 2.488626 1.617299 4.043715  
H 1.213356 2.733163 4.575163  
H 1.246976 0.167168 2.076233  
H -0.484581 0.866517 0.701592  
C 0.530223 2.242058 -0.588172  
C -0.489582 3.186282 -0.415902  
C 1.534313 2.482518 -1.532205

C -0.476714 4.375860 -1.143338  
H -1.299844 2.964927 0.284733  
C 1.544667 3.671688 -2.261733  
H 2.315391 1.739214 -1.712986  
C 0.545930 4.625181 -2.060121  
H -1.272673 5.108200 -0.999965  
H 2.334557 3.852037 -2.992227  
H 0.556440 5.555729 -2.629464  
C -1.485379 -0.263205 -1.206209  
H -1.502366 0.823227 -1.181659  
C -2.678700 -0.953426 -1.177695  
C -3.861545 -0.273074 -1.807679  
F -3.821120 -0.430485 -3.139276  
F -5.047272 -0.746101 -1.414866  
F -3.871219 1.044575 -1.577492  
O -0.053659 -2.150190 -1.316575  
C -0.260852 -0.980324 -1.028121  
H 3.218588 1.930880 0.517522  
C 5.559249 -0.332334 0.488427  
H 5.651683 0.574001 1.085877  
H 7.654873 -0.788112 0.543238  
H -2.684759 -2.040829 -1.294826  
C -0.932495 -3.845982 1.467015  
H -0.512216 -3.616334 2.455613  
H -1.183094 -4.909835 1.404150  
H -0.196972 -3.579260 0.694384  
C -2.050866 -1.789460 1.295299  
O -2.143114 -3.136827 1.254432  
O -0.988303 -1.239992 1.528687  
C -4.613662 -1.877056 1.106131  
C -3.474285 0.281457 1.206744  
C -5.676984 -0.783252 1.403074  
H -4.869958 -2.459154 0.207796  
C -4.967768 0.578228 1.321791  
H -6.096612 -0.935098 2.406712  
H -5.135234 1.219370 2.199421  
C -3.301134 -1.138664 0.955612

O -2.604466 1.144943 1.262536  
H -4.551711 -2.603027 1.930730  
H -6.512908 -0.841924 0.694886  
H -5.266431 1.165481 0.439858

-----  
PCMopt/9\_TS\_SRb

Frequencies, energies and thermodynamic properties:

Lowest Vibrational Mode (1/cm) = -212.5120  
2nd Lowest Vibrational Mode (1/cm) = 23.8449  
E(RM062X) (a.u.) = -2267.74116899  
Thermal correction to Enthalpy (a.u.) = 0.606915  
Thermal correction to Gibbs Free Energy (a.u.) = 0.504900  
Total Entropy (cal/Kmol) = 214.709  
Esp(RM062X+D3) (a.u.) = -2269.99033473  
Esp(D3) (a.u.) = -0.0085946364  
Esp(RM062X) (a.u.) = -2269.9817400936

Optimised cartesian coordinates (Angstrom):

C 6.688960 -1.095555 0.114612  
C 6.560459 -2.307288 -0.578882  
C 5.314367 -2.759036 -1.003052  
C 4.200953 -1.969817 -0.717664  
C 4.331660 -0.768479 -0.018303  
H 7.447600 -2.903565 -0.792627  
H 5.209372 -3.699330 -1.544675  
C 2.060734 -0.781317 -0.387784  
C 0.526381 1.005329 0.296651  
C 1.523699 1.193413 1.450858  
C 2.949213 1.100858 0.935360  
H 3.663850 1.055808 1.767325  
S 2.524066 -2.295898 -1.116983  
N 3.096202 -0.138162 0.167377  
N 0.820606 -0.274870 -0.391523  
C 1.259900 2.464097 2.291202  
C 1.990367 3.715924 1.795646  
C 1.607758 2.202950 3.758186  
H 0.174918 2.651708 2.234148  
H 3.075953 3.628372 1.959464

|   |           |           |           |
|---|-----------|-----------|-----------|
| H | 1.817368  | 3.919440  | 0.729772  |
| H | 1.646568  | 4.590699  | 2.365386  |
| H | 1.012418  | 1.375420  | 4.169063  |
| H | 2.673138  | 1.946438  | 3.870867  |
| H | 1.416007  | 3.098565  | 4.365748  |
| H | 1.362367  | 0.328525  | 2.114789  |
| H | -0.464530 | 0.865049  | 0.752939  |
| C | 0.467225  | 2.166628  | -0.671275 |
| C | -0.543968 | 3.120487  | -0.503175 |
| C | 1.411377  | 2.339690  | -1.688401 |
| C | -0.580250 | 4.255906  | -1.311386 |
| H | -1.308885 | 2.948577  | 0.259169  |
| C | 1.372864  | 3.475136  | -2.498429 |
| H | 2.183049  | 1.585533  | -1.864202 |
| C | 0.384331  | 4.440295  | -2.303631 |
| H | -1.369053 | 4.996493  | -1.171360 |
| H | 2.116413  | 3.603650  | -3.286192 |
| H | 0.356426  | 5.328738  | -2.936079 |
| C | -1.507888 | -0.333083 | -1.152309 |
| H | -1.549009 | 0.753252  | -1.156912 |
| C | -2.664734 | -1.068485 | -1.161515 |
| C | -3.885257 | -0.484758 | -1.808081 |
| F | -3.691428 | -0.341997 | -3.128388 |
| F | -4.962984 | -1.261717 | -1.674726 |
| F | -4.196353 | 0.729342  | -1.341361 |
| O | -0.059464 | -2.205735 | -1.227795 |
| C | -0.268920 | -1.034040 | -0.955957 |
| H | 3.216312  | 1.952369  | 0.291920  |
| C | 5.579246  | -0.308322 | 0.405519  |
| H | 5.687563  | 0.637194  | 0.935595  |
| H | 7.676024  | -0.758282 | 0.431421  |
| H | -2.612596 | -2.158393 | -1.222860 |
| C | -0.090861 | -2.413484 | 1.910780  |
| H | 0.165533  | -3.037257 | 1.041900  |
| H | 0.770163  | -1.798351 | 2.198109  |
| H | -0.377759 | -3.063997 | 2.746863  |
| C | -2.346223 | -2.092443 | 1.362464  |



|   |           |           |          |
|---|-----------|-----------|----------|
| O | -1.140742 | -1.516318 | 1.583419 |
| O | -2.482520 | -3.300912 | 1.441011 |
| C | -4.830505 | -1.684931 | 1.195256 |
| C | -3.379748 | 0.250547  | 1.315620 |
| C | -5.716286 | -0.421844 | 1.151726 |
| H | -5.117526 | -2.419514 | 0.428874 |
| C | -4.804414 | 0.726367  | 1.591837 |
| H | -6.608108 | -0.523082 | 1.784295 |
| H | -4.867794 | 0.908147  | 2.678395 |
| C | -3.415283 | -1.168720 | 1.028400 |
| O | -2.407976 | 1.003919  | 1.345865 |
| H | -4.926028 | -2.199794 | 2.168301 |
| H | -6.062704 | -0.246229 | 0.125475 |
| H | -4.998193 | 1.684938  | 1.090480 |

-----

PCMopt/9\_TS\_SRc

Frequencies, energies and thermodynamic properties:

|                                                  |                  |
|--------------------------------------------------|------------------|
| Lowest Vibrational Mode (1/cm) =                 | -212.6060        |
| 2nd Lowest Vibrational Mode (1/cm) =             | 23.8662          |
| E(RM062X) (a.u.) =                               | -2267.74116897   |
| Thermal correction to Enthalpy (a.u.) =          | 0.606916         |
| Thermal correction to Gibbs Free Energy (a.u.) = | 0.504909         |
| Total Entropy (cal/Kmol) =                       | 214.691          |
| Esp(RM062X+D3) (a.u.) =                          | -2269.99033153   |
| Esp(D3) (a.u.) =                                 | -0.0085948276    |
| Esp(RM062X) (a.u.) =                             | -2269.9817367024 |

Optimised cartesian coordinates (Angstrom):

|   |          |           |           |
|---|----------|-----------|-----------|
| C | 6.688857 | -1.095446 | 0.114729  |
| C | 6.560391 | -2.307201 | -0.578733 |
| C | 5.314318 | -2.758968 | -1.002938 |
| C | 4.200887 | -1.969750 | -0.717615 |
| C | 4.331560 | -0.768387 | -0.018289 |
| H | 7.447544 | -2.903479 | -0.792425 |
| H | 5.209350 | -3.699279 | -1.544538 |
| C | 2.060647 | -0.781248 | -0.387861 |
| C | 0.526217 | 1.005332  | 0.296583  |
| C | 1.523538 | 1.193458  | 1.450779  |

|   |           |           |           |
|---|-----------|-----------|-----------|
| C | 2.949057  | 1.100955  | 0.935286  |
| H | 3.663684  | 1.055922  | 1.767262  |
| S | 2.524015  | -2.295856 | -1.116990 |
| N | 3.096093  | -0.138069 | 0.167318  |
| N | 0.820521  | -0.274819 | -0.391647 |
| C | 1.259683  | 2.464143  | 2.291100  |
| C | 1.990171  | 3.715971  | 1.795568  |
| C | 1.607454  | 2.203038  | 3.758110  |
| H | 0.174705  | 2.651761  | 2.234003  |
| H | 3.075695  | 3.628624  | 1.959912  |
| H | 1.817638  | 3.919194  | 0.729562  |
| H | 1.645963  | 4.590840  | 2.364917  |
| H | 1.012373  | 1.375259  | 4.168862  |
| H | 2.672919  | 1.946936  | 3.870913  |
| H | 1.415275  | 3.098547  | 4.365695  |
| H | 1.362252  | 0.328572  | 2.114722  |
| H | -0.464649 | 0.864898  | 0.752923  |
| C | 0.466993  | 2.166653  | -0.671305 |
| C | -0.544131 | 3.120565  | -0.503105 |
| C | 1.411075  | 2.339680  | -1.688501 |
| C | -0.580405 | 4.256004  | -1.311289 |
| H | -1.309006 | 2.948674  | 0.259286  |
| C | 1.372569  | 3.475144  | -2.498502 |
| H | 2.182688  | 1.585479  | -1.864375 |
| C | 0.384111  | 4.440359  | -2.303604 |
| H | -1.369153 | 4.996635  | -1.171188 |
| H | 2.116064  | 3.603629  | -3.286321 |
| H | 0.356212  | 5.328820  | -2.936026 |
| C | -1.507944 | -0.333033 | -1.152476 |
| H | -1.549134 | 0.753299  | -1.156950 |
| C | -2.664788 | -1.068494 | -1.161554 |
| C | -3.885378 | -0.484806 | -1.808033 |
| F | -3.691703 | -0.342284 | -3.128398 |
| F | -4.963154 | -1.261642 | -1.674456 |
| F | -4.196179 | 0.729417  | -1.341454 |
| O | -0.059515 | -2.205675 | -1.227997 |
| C | -0.268988 | -1.033971 | -0.956171 |

|   |           |           |           |
|---|-----------|-----------|-----------|
| H | 3.216143  | 1.952475  | 0.291854  |
| C | 5.579127  | -0.308210 | 0.405566  |
| H | 5.687416  | 0.637326  | 0.935612  |
| H | 7.675907  | -0.758157 | 0.431566  |
| H | -2.612573 | -2.158394 | -1.223037 |
| C | -0.090255 | -2.413341 | 1.910280  |
| H | 0.166137  | -3.037017 | 1.041326  |
| H | 0.770724  | -1.798108 | 2.197545  |
| H | -0.376980 | -3.063944 | 2.746351  |
| C | -2.345765 | -2.092527 | 1.362389  |
| O | -1.140288 | -1.516297 | 1.583065  |
| O | -2.481978 | -3.300992 | 1.441073  |
| C | -4.830104 | -1.685174 | 1.195562  |
| C | -3.379474 | 0.250378  | 1.315791  |
| C | -5.715968 | -0.422151 | 1.152077  |
| H | -5.117245 | -2.419897 | 0.429358  |
| C | -4.804140 | 0.726028  | 1.592327  |
| H | -6.607818 | -0.523506 | 1.784588  |
| H | -4.867341 | 0.907438  | 2.678964  |
| C | -3.414945 | -1.168887 | 1.028382  |
| O | -2.407757 | 1.003808  | 1.346016  |
| H | -4.925391 | -2.199880 | 2.168714  |
| H | -6.062353 | -0.246417 | 0.125846  |
| H | -4.998177 | 1.684821  | 1.091428  |

-----

PCMopt/9\_TS\_SRd

Frequencies, energies and thermodynamic properties:

|                                                  |                  |
|--------------------------------------------------|------------------|
| Lowest Vibrational Mode (1/cm) =                 | -159.3395        |
| 2nd Lowest Vibrational Mode (1/cm) =             | 22.5071          |
| E(RM062X) (a.u.) =                               | -2267.73329494   |
| Thermal correction to Enthalpy (a.u.) =          | 0.606557         |
| Thermal correction to Gibbs Free Energy (a.u.) = | 0.502594         |
| Total Entropy (cal/Kmol) =                       | 218.808          |
| Esp(RM062X+D3) (a.u.) =                          | -2269.98657324   |
| Esp(D3) (a.u.) =                                 | -0.0085336154    |
| Esp(RM062X) (a.u.) =                             | -2269.9780396246 |

Optimised cartesian coordinates (Angstrom):

|   |           |           |           |
|---|-----------|-----------|-----------|
| C | 6.855076  | -1.163322 | 0.294549  |
| C | 6.742879  | -2.386489 | -0.382351 |
| C | 5.506448  | -2.850855 | -0.819676 |
| C | 4.385382  | -2.061764 | -0.564192 |
| C | 4.499620  | -0.849297 | 0.118301  |
| H | 7.636035  | -2.981868 | -0.572147 |
| H | 5.414047  | -3.799851 | -1.348174 |
| C | 2.236256  | -0.881084 | -0.283588 |
| C | 0.692278  | 0.927579  | 0.323459  |
| C | 1.658122  | 1.131616  | 1.501696  |
| C | 3.095277  | 1.026752  | 1.023049  |
| H | 3.787669  | 0.989786  | 1.873977  |
| S | 2.717550  | -2.400762 | -0.984713 |
| N | 3.258124  | -0.222882 | 0.275115  |
| N | 0.989853  | -0.379843 | -0.315729 |
| C | 1.376623  | 2.419987  | 2.308992  |
| C | 2.120366  | 3.660490  | 1.804717  |
| C | 1.688917  | 2.188696  | 3.788849  |
| H | 0.293486  | 2.608202  | 2.222362  |
| H | 3.201327  | 3.576733  | 1.998056  |
| H | 1.974630  | 3.841015  | 0.730634  |
| H | 1.762473  | 4.547328  | 2.346276  |
| H | 1.083732  | 1.369596  | 4.202135  |
| H | 2.751223  | 1.935197  | 3.932431  |
| H | 1.482566  | 3.096667  | 4.372673  |
| H | 1.477358  | 0.276804  | 2.174453  |
| H | -0.314669 | 0.830919  | 0.754923  |
| C | 0.668593  | 2.060222  | -0.679873 |
| C | -0.344278 | 3.020810  | -0.569146 |
| C | 1.641850  | 2.198514  | -1.674430 |
| C | -0.355516 | 4.129540  | -1.414231 |
| H | -1.132390 | 2.875831  | 0.175633  |
| C | 1.628127  | 3.307843  | -2.520607 |
| H | 2.416295  | 1.438347  | -1.805874 |
| C | 0.636624  | 4.280023  | -2.384586 |
| H | -1.146288 | 4.875150  | -1.319836 |
| H | 2.393533  | 3.409935  | -3.291008 |

|   |           |           |           |
|---|-----------|-----------|-----------|
| H | 0.628334  | 5.147378  | -3.046114 |
| C | -1.318935 | -0.443064 | -1.117061 |
| H | -1.332937 | 0.643712  | -1.153757 |
| C | -2.492180 | -1.130149 | -1.172990 |
| C | -3.679252 | -0.481186 | -1.820154 |
| F | -3.619440 | -0.668862 | -3.151418 |
| F | -4.844111 | -0.973565 | -1.424010 |
| F | -3.701021 | 0.843340  | -1.628657 |
| O | 0.127035  | -2.326164 | -1.145969 |
| C | -0.081926 | -1.155382 | -0.887967 |
| H | 3.383318  | 1.867694  | 0.374856  |
| C | 5.738087  | -0.376561 | 0.555467  |
| H | 5.833697  | 0.577039  | 1.073348  |
| H | 7.835544  | -0.817333 | 0.622158  |
| H | -2.506104 | -2.221600 | -1.191900 |
| C | -4.793943 | 2.181848  | 0.891786  |
| H | -4.229071 | 2.579588  | 0.037274  |
| H | -5.863759 | 2.368252  | 0.749794  |
| H | -4.445488 | 2.679652  | 1.807347  |
| C | -3.386918 | 0.328670  | 1.174519  |
| O | -4.642235 | 0.778351  | 0.984161  |
| O | -2.448681 | 1.114000  | 1.300889  |
| C | -1.955185 | -1.670587 | 1.722029  |
| C | -4.273037 | -2.106805 | 1.228239  |
| C | -2.088301 | -3.185568 | 1.498675  |
| H | -1.057237 | -1.243553 | 1.243678  |
| C | -3.595989 | -3.445244 | 1.566597  |
| H | -1.516407 | -3.773433 | 2.229099  |
| H | -3.914862 | -3.714377 | 2.587763  |
| C | -3.229511 | -1.100291 | 1.168546  |
| O | -5.483681 | -2.003399 | 1.089329  |
| H | -1.848643 | -1.432289 | 2.796830  |
| H | -1.695435 | -3.440012 | 0.501868  |
| H | -3.960289 | -4.239437 | 0.898733  |

-----  
PCMopt/9\_TS\_SRe

Frequencies, energies and thermodynamic properties:

Lowest Vibrational Mode (1/cm) = -95.9008  
2nd Lowest Vibrational Mode (1/cm) = 18.5914  
E(RM062X) (a.u.) = -2267.72789129  
Thermal correction to Enthalpy (a.u.) = 0.606287  
Thermal correction to Gibbs Free Energy (a.u.) = 0.500889  
Total Entropy (cal/Kmol) = 221.829  
Esp(RM062X+D3) (a.u.) = -2269.98486106  
Esp(D3) (a.u.) = -0.0086395694  
Esp(RM062X) (a.u.) = -2269.9762214906

Optimised cartesian coordinates (Angstrom):

C 6.669007 -1.596825 0.347518  
C 6.462861 -2.799488 -0.344922  
C 5.200758 -3.147642 -0.813529  
C 4.148792 -2.263877 -0.571211  
C 4.355717 -1.073104 0.126576  
H 7.303629 -3.470248 -0.522131  
H 5.035930 -4.079122 -1.355204  
C 2.107297 -0.903381 -0.318330  
C 0.708106 1.022554 0.298081  
C 1.685061 1.149145 1.479177  
C 3.108369 0.920002 1.005151  
H 3.790707 0.830942 1.859974  
S 2.470965 -2.442807 -1.042132  
N 3.170580 -0.341584 0.263986  
N 0.900508 -0.300336 -0.347895  
C 1.523043 2.464709 2.276312  
C 2.382859 3.625882 1.767275  
C 1.804673 2.214930 3.759160  
H 0.464329 2.758648 2.185298  
H 3.449681 3.444502 1.971039  
H 2.263429 3.809559 0.690487  
H 2.103907 4.546753 2.298042  
H 1.121539 1.461122 4.174809  
H 2.837034 1.861870 3.909735  
H 1.684228 3.143232 4.334749  
H 1.428753 0.317652 2.156344  
H -0.301007 0.996964 0.735227

C 0.782284 2.147727 -0.712740  
C -0.116876 3.214098 -0.605647  
C 1.753285 2.172433 -1.719363  
C -0.024495 4.307092 -1.465243  
H -0.898435 3.187684 0.157237  
C 1.846218 3.266029 -2.580389  
H 2.444023 1.335509 -1.849468  
C 0.963839 4.338576 -2.449517  
H -0.730611 5.132671 -1.368988  
H 2.609666 3.276225 -3.359198  
H 1.037875 5.192536 -3.124003  
C -1.432691 -0.188844 -1.117729  
H -1.432459 0.894945 -1.026302  
C -2.599591 -0.845875 -1.298564  
C -3.811640 -0.092041 -1.757119  
F -3.820293 -0.035365 -3.101790  
F -4.953176 -0.656739 -1.395849  
F -3.811308 1.173774 -1.326651  
O -0.053973 -2.097986 -1.372642  
C -0.203247 -0.957205 -0.982935  
H 3.468628 1.729259 0.352738  
C 5.622086 -0.715620 0.593793  
H 5.792244 0.221006 1.123288  
H 7.669236 -1.343102 0.698908  
H -2.634115 -1.926399 -1.448126  
C -3.121043 2.329051 1.739966  
H -3.916673 2.452582 2.486918  
H -2.216930 2.848608 2.079476  
H -3.470089 2.759764 0.789685  
C -3.830577 0.119615 1.326736  
O -2.776001 0.967327 1.581243  
O -4.959765 0.567476 1.247789  
C -2.024469 -1.685759 1.625874  
C -4.258965 -2.364509 1.006721  
C -1.957540 -3.165788 1.205654  
H -1.205611 -1.085002 1.187905  
C -3.414647 -3.633857 1.208435

|   |           |           |          |
|---|-----------|-----------|----------|
| H | -1.309353 | -3.762382 | 1.862228 |
| H | -3.702632 | -4.058125 | 2.185683 |
| C | -3.380470 | -1.234474 | 1.168743 |
| O | -5.465774 | -2.408785 | 0.787373 |
| H | -1.902206 | -1.575592 | 2.719684 |
| H | -1.539853 | -3.235641 | 0.189564 |
| H | -3.658840 | -4.388687 | 0.446765 |

-----  
PCMOpt/9\_TS\_SRF

Frequencies, energies and thermodynamic properties:

|                                                  |                  |
|--------------------------------------------------|------------------|
| Lowest Vibrational Mode (1/cm) =                 | -245.3849        |
| 2nd Lowest Vibrational Mode (1/cm) =             | 18.8883          |
| E(RM062X) (a.u.) =                               | -2267.73099425   |
| Thermal correction to Enthalpy (a.u.) =          | 0.606602         |
| Thermal correction to Gibbs Free Energy (a.u.) = | 0.501614         |
| Total Entropy (cal/Kmol) =                       | 220.967          |
| Esp(RM062X+D3) (a.u.) =                          | -2269.98369158   |
| Esp(D3) (a.u.) =                                 | -0.0081295828    |
| Esp(RM062X) (a.u.) =                             | -2269.9755619972 |

Optimised cartesian coordinates (Angstrom):

|   |          |           |           |
|---|----------|-----------|-----------|
| C | 6.532835 | -2.232857 | 0.271036  |
| C | 6.158957 | -3.425834 | -0.363448 |
| C | 4.842893 | -3.641054 | -0.761931 |
| C | 3.910521 | -2.634869 | -0.512109 |
| C | 4.285225 | -1.452806 | 0.128463  |
| H | 6.908166 | -4.195195 | -0.550769 |
| H | 4.547543 | -4.566145 | -1.257581 |
| C | 2.050456 | -1.031170 | -0.233145 |
| C | 0.936618 | 1.072035  | 0.315431  |
| C | 1.942753 | 1.120868  | 1.477712  |
| C | 3.316375 | 0.694149  | 0.992125  |
| H | 3.997600 | 0.540869  | 1.839344  |
| S | 2.196720 | -2.640486 | -0.890315 |
| N | 3.200926 | -0.583015 | 0.287548  |
| N | 0.938075 | -0.286640 | -0.265265 |
| C | 1.962252 | 2.473347  | 2.227170  |
| C | 2.957131 | 3.495337  | 1.668297  |



|   |           |           |           |
|---|-----------|-----------|-----------|
| C | 2.226844  | 2.242837  | 3.716303  |
| H | 0.949766  | 2.899785  | 2.133724  |
| H | 3.994636  | 3.185264  | 1.868588  |
| H | 2.846527  | 3.652932  | 0.586234  |
| H | 2.806692  | 4.463463  | 2.166180  |
| H | 1.456453  | 1.599017  | 4.163648  |
| H | 3.206197  | 1.763696  | 3.872504  |
| H | 2.234283  | 3.198520  | 4.259011  |
| H | 1.585565  | 0.354066  | 2.184874  |
| H | -0.055273 | 1.183783  | 0.767918  |
| C | 1.133284  | 2.139154  | -0.740570 |
| C | 0.387519  | 3.320584  | -0.660828 |
| C | 2.074844  | 1.996740  | -1.765392 |
| C | 0.603592  | 4.357400  | -1.566948 |
| H | -0.370626 | 3.430865  | 0.118841  |
| C | 2.291263  | 3.033479  | -2.673410 |
| H | 2.645198  | 1.070509  | -1.871661 |
| C | 1.562399  | 4.218518  | -2.571205 |
| H | 0.017082  | 5.273944  | -1.491473 |
| H | 3.030465  | 2.911461  | -3.466128 |
| H | 1.732580  | 5.028329  | -3.281842 |
| C | -1.380618 | 0.044976  | -1.009614 |
| H | -1.226618 | 1.122194  | -1.039422 |
| C | -2.653818 | -0.485397 | -1.045259 |
| C | -3.736428 | 0.213790  | -1.806243 |
| F | -3.499967 | 0.144773  | -3.126744 |
| F | -4.938376 | -0.338357 | -1.616868 |
| F | -3.833851 | 1.514062  | -1.509969 |
| O | -0.281930 | -2.055892 | -1.017658 |
| C | -0.291702 | -0.858469 | -0.782778 |
| H | 3.765640  | 1.433985  | 0.312662  |
| C | 5.603841  | -1.228964 | 0.526842  |
| H | 5.902282  | -0.300390 | 1.012084  |
| H | 7.570786  | -2.083628 | 0.569071  |
| H | -2.729363 | -1.574635 | -1.085050 |
| C | -5.960823 | -3.275864 | 0.778519  |
| H | -5.633494 | -3.916154 | 1.609077  |

|   |           |           |           |
|---|-----------|-----------|-----------|
| H | -7.051012 | -3.177158 | 0.788075  |
| H | -5.631494 | -3.734264 | -0.164214 |
| C | -4.088730 | -1.863478 | 0.899710  |
| O | -5.436984 | -1.966357 | 0.910740  |
| O | -3.387955 | -2.851398 | 0.804492  |
| C | -4.679741 | 0.622205  | 1.240965  |
| C | -2.431432 | -0.117202 | 1.685368  |
| C | -3.832376 | 1.854551  | 1.595277  |
| H | -5.352615 | 0.800997  | 0.392019  |
| C | -2.608518 | 1.270814  | 2.297493  |
| H | -4.379658 | 2.582161  | 2.208930  |
| H | -2.795878 | 1.123444  | 3.375379  |
| C | -3.654911 | -0.471145 | 0.985087  |
| O | -1.377329 | -0.738746 | 1.739757  |
| H | -5.323219 | 0.339157  | 2.092818  |
| H | -3.520000 | 2.361311  | 0.671278  |
| H | -1.688442 | 1.867963  | 2.211011  |

-----  
PCMopt/9\_TS\_SSa

Frequencies, energies and thermodynamic properties:

|                                                  |                  |
|--------------------------------------------------|------------------|
| Lowest Vibrational Mode (1/cm) =                 | -208.0441        |
| 2nd Lowest Vibrational Mode (1/cm) =             | 20.0319          |
| E(RM062X) (a.u.) =                               | -2267.73882776   |
| Thermal correction to Enthalpy (a.u.) =          | 0.606652         |
| Thermal correction to Gibbs Free Energy (a.u.) = | 0.502367         |
| Total Entropy (cal/Kmol) =                       | 219.487          |
| Esp(RM062X+D3) (a.u.) =                          | -2269.99018280   |
| Esp(D3) (a.u.) =                                 | -0.0085591977    |
| Esp(RM062X) (a.u.) =                             | -2269.9816236023 |

Optimised cartesian coordinates (Angstrom):

|   |          |           |           |
|---|----------|-----------|-----------|
| C | 6.647852 | -1.380539 | 0.291716  |
| C | 6.491266 | -2.567389 | -0.437741 |
| C | 5.243484 | -2.948383 | -0.922699 |
| C | 4.157597 | -2.113564 | -0.662615 |
| C | 4.315938 | -0.937129 | 0.072299  |
| H | 7.357395 | -3.200433 | -0.631141 |
| H | 5.116483 | -3.869726 | -1.491506 |

|   |           |           |           |
|---|-----------|-----------|-----------|
| C | 2.061997  | -0.833555 | -0.383871 |
| C | 0.598047  | 1.016991  | 0.265162  |
| C | 1.538686  | 1.117102  | 1.476337  |
| C | 2.982408  | 0.962220  | 1.032260  |
| H | 3.646927  | 0.848603  | 1.898846  |
| S | 2.483784  | -2.351319 | -1.133200 |
| N | 3.104799  | -0.254261 | 0.226830  |
| N | 0.851776  | -0.266696 | -0.428750 |
| C | 1.303318  | 2.377084  | 2.339411  |
| C | 2.121872  | 3.600115  | 1.914930  |
| C | 1.562143  | 2.057839  | 3.813098  |
| H | 0.234402  | 2.629209  | 2.237982  |
| H | 3.191486  | 3.451474  | 2.130747  |
| H | 2.015232  | 3.836510  | 0.846966  |
| H | 1.794750  | 4.478706  | 2.488523  |
| H | 0.903024  | 1.253531  | 4.168716  |
| H | 2.604969  | 1.739217  | 3.969091  |
| H | 1.389332  | 2.945915  | 4.437211  |
| H | 1.281457  | 0.238560  | 2.090589  |
| H | -0.413591 | 0.916109  | 0.680530  |
| C | 0.656359  | 2.187285  | -0.692461 |
| C | -0.299243 | 3.202641  | -0.578036 |
| C | 1.661068  | 2.306431  | -1.659063 |
| C | -0.230598 | 4.337339  | -1.384658 |
| H | -1.107224 | 3.099012  | 0.149724  |
| C | 1.730668  | 3.440455  | -2.468446 |
| H | 2.396714  | 1.509831  | -1.796019 |
| C | 0.791105  | 4.462245  | -2.326587 |
| H | -0.981045 | 5.122170  | -1.281398 |
| H | 2.521033  | 3.523226  | -3.215651 |
| H | 0.847242  | 5.348620  | -2.959860 |
| C | -1.484903 | -0.258300 | -1.161594 |
| H | -1.511808 | 0.825275  | -1.085162 |
| C | -2.657039 | -0.961802 | -1.233150 |
| C | -3.872926 | -0.262250 | -1.768019 |
| F | -3.828521 | -0.226437 | -3.109805 |
| F | -5.022111 | -0.857147 | -1.449810 |

|   |           |           |           |
|---|-----------|-----------|-----------|
| F | -3.949008 | 1.008814  | -1.356556 |
| O | -0.082053 | -2.160760 | -1.300292 |
| C | -0.261206 | -0.994250 | -0.991546 |
| H | 3.330455  | 1.819700  | 0.436897  |
| C | 5.564962  | -0.548189 | 0.558285  |
| H | 5.694744  | 0.377083  | 1.118484  |
| H | 7.635660  | -1.099178 | 0.657152  |
| H | -2.642453 | -2.037273 | -1.427246 |
| C | -3.464644 | 2.192793  | 1.627715  |
| H | -4.172288 | 2.189278  | 2.467019  |
| H | -2.597413 | 2.813978  | 1.878649  |
| H | -3.974221 | 2.595593  | 0.740624  |
| C | -3.913534 | -0.065492 | 1.206765  |
| O | -2.970233 | 0.890866  | 1.370779  |
| O | -5.097662 | 0.204585  | 1.289685  |
| C | -4.309764 | -2.576916 | 0.855618  |
| C | -2.061903 | -1.823897 | 1.319279  |
| C | -3.544408 | -3.700232 | 1.584433  |
| H | -5.284979 | -2.355088 | 1.311053  |
| C | -2.071447 | -3.352393 | 1.367667  |
| H | -3.815168 | -4.702762 | 1.226528  |
| H | -1.704479 | -3.714068 | 0.390706  |
| C | -3.376578 | -1.385637 | 0.917596  |
| O | -1.051733 | -1.145933 | 1.503382  |
| H | -4.512709 | -2.873963 | -0.188298 |
| H | -3.770742 | -3.657272 | 2.661092  |
| H | -1.382990 | -3.724912 | 2.138385  |

-----

PCMopt/9\_TS\_SSb

Frequencies, energies and thermodynamic properties:

|                                                  |                |
|--------------------------------------------------|----------------|
| Lowest Vibrational Mode (1/cm) =                 | -245.7810      |
| 2nd Lowest Vibrational Mode (1/cm) =             | 22.0242        |
| E(RM062X) (a.u.) =                               | -2267.74289945 |
| Thermal correction to Enthalpy (a.u.) =          | 0.606824       |
| Thermal correction to Gibbs Free Energy (a.u.) = | 0.503502       |
| Total Entropy (cal/Kmol) =                       | 217.460        |
| Esp(RM062X+D3) (a.u.) =                          | -2269.99108533 |

Esp(D3) (a.u.) = -0.0084419643  
Esp(RM062X) (a.u.) = -2269.9826433657

Optimised cartesian coordinates (Angstrom):

C 6.783978 -1.031093 0.312316  
C 6.719559 -2.212200 -0.439399  
C 5.505086 -2.676528 -0.937255  
C 4.358805 -1.930608 -0.668008  
C 4.425680 -0.758703 0.088527  
H 7.631285 -2.774942 -0.640405  
H 5.449852 -3.594090 -1.523476  
C 2.172434 -0.812353 -0.381123  
C 0.580845 0.922689 0.273296  
C 1.490483 1.058411 1.503388  
C 2.949478 1.014133 1.084025  
H 3.607197 0.921769 1.958529  
S 2.707676 -2.287479 -1.145772  
N 3.167104 -0.169814 0.249014  
N 0.928584 -0.333056 -0.433452  
C 1.144749 2.275973 2.389269  
C 1.879667 3.565583 2.011747  
C 1.394309 1.941521 3.861178  
H 0.062230 2.447515 2.265933  
H 2.953069 3.490332 2.247132  
H 1.776795 3.819020 0.947302  
H 1.477685 4.404061 2.597931  
H 0.788479 1.082650 4.182773  
H 2.454121 1.696111 4.034612  
H 1.142799 2.798938 4.501458  
H 1.284753 0.149864 2.092769  
H -0.433035 0.762145 0.662667  
C 0.580155 2.114966 -0.657439  
C -0.459928 3.045490 -0.542098  
C 1.597463 2.338432 -1.591554  
C -0.456957 4.204779 -1.316996  
H -1.278293 2.837907 0.153097  
C 1.598313 3.497049 -2.368774  
H 2.396961 1.605418 -1.727993

|   |           |           |           |
|---|-----------|-----------|-----------|
| C | 0.577243  | 4.437229  | -2.225140 |
| H | -1.269550 | 4.926040  | -1.217476 |
| H | 2.398415  | 3.663606  | -3.091379 |
| H | 0.579951  | 5.343582  | -2.832333 |
| C | -1.376852 | -0.453624 | -1.213359 |
| H | -1.416534 | 0.632568  | -1.215789 |
| C | -2.554320 | -1.164291 | -1.196574 |
| C | -3.748005 | -0.527917 | -1.855216 |
| F | -3.671552 | -0.689080 | -3.185923 |
| F | -4.921575 | -1.040807 | -1.486522 |
| F | -3.805717 | 0.791288  | -1.634608 |
| O | 0.110074  | -2.304027 | -1.262858 |
| C | -0.137015 | -1.139281 | -0.995980 |
| H | 3.247435  | 1.909024  | 0.517325  |
| C | 5.640334  | -0.287229 | 0.588017  |
| H | 5.697813  | 0.634515  | 1.165919  |
| H | 7.746405  | -0.683251 | 0.688172  |
| H | -2.536689 | -2.253712 | -1.289411 |
| C | -5.051193 | 1.901181  | 1.062720  |
| H | -4.616849 | 2.400131  | 0.185365  |
| H | -6.141363 | 2.000775  | 1.049264  |
| H | -4.642033 | 2.363863  | 1.971131  |
| C | -3.469054 | 0.166323  | 1.057155  |
| O | -4.774989 | 0.512775  | 1.029882  |
| O | -2.596104 | 1.014100  | 1.150087  |
| C | -4.368954 | -2.296532 | 1.045151  |
| C | -2.024564 | -1.848824 | 1.413137  |
| C | -3.785708 | -3.372043 | 1.983278  |
| H | -5.304244 | -1.862073 | 1.421246  |
| C | -2.282600 | -3.324301 | 1.710385  |
| H | -4.229501 | -4.363385 | 1.820443  |
| H | -2.020077 | -3.900127 | 0.804511  |
| C | -3.260482 | -1.265072 | 0.920736  |
| O | -0.930570 | -1.307032 | 1.525302  |
| H | -4.601605 | -2.749414 | 0.067328  |
| H | -3.972065 | -3.087868 | 3.030556  |
| H | -1.641447 | -3.679330 | 2.527921  |

-----  
PCMopt/9\_TS\_SSc

Frequencies, energies and thermodynamic properties:

|                                                  |                  |
|--------------------------------------------------|------------------|
| Lowest Vibrational Mode (1/cm) =                 | -165.5859        |
| 2nd Lowest Vibrational Mode (1/cm) =             | 17.9919          |
| E(RM062X) (a.u.) =                               | -2267.73653774   |
| Thermal correction to Enthalpy (a.u.) =          | 0.606673         |
| Thermal correction to Gibbs Free Energy (a.u.) = | 0.502117         |
| Total Entropy (cal/Kmol) =                       | 220.056          |
| Esp(RM062X+D3) (a.u.) =                          | -2269.98934632   |
| Esp(D3) (a.u.) =                                 | -0.0084179850    |
| Esp(RM062X) (a.u.) =                             | -2269.9809283350 |

Optimised cartesian coordinates (Angstrom):

|   |          |           |           |
|---|----------|-----------|-----------|
| C | 6.591049 | -1.607778 | 0.131303  |
| C | 6.355908 | -2.736338 | -0.667238 |
| C | 5.082234 | -3.015778 | -1.152469 |
| C | 4.049928 | -2.138768 | -0.820542 |
| C | 4.286104 | -1.021698 | -0.017529 |
| H | 7.181646 | -3.403587 | -0.914593 |
| H | 4.894481 | -3.890575 | -1.775406 |
| C | 2.036269 | -0.764854 | -0.423201 |
| C | 0.685202 | 1.118169  | 0.377747  |
| C | 1.654401 | 1.085654  | 1.570061  |
| C | 3.076953 | 0.887200  | 1.079078  |
| H | 3.754363 | 0.688743  | 1.919669  |
| S | 2.360562 | -2.249602 | -1.276867 |
| N | 3.117597 | -0.283430 | 0.200610  |
| N | 0.854594 | -0.127954 | -0.406253 |
| C | 1.509526 | 2.294093  | 2.522832  |
| C | 2.390180 | 3.494693  | 2.163063  |
| C | 1.780486 | 1.857090  | 3.963876  |
| H | 0.455803 | 2.613475  | 2.466716  |
| H | 3.453365 | 3.270778  | 2.342665  |
| H | 2.276275 | 3.810923  | 1.116727  |
| H | 2.126514 | 4.348371  | 2.802992  |
| H | 1.082590 | 1.068907  | 4.279442  |
| H | 2.805859 | 1.469340  | 4.071605  |

|   |           |           |           |
|---|-----------|-----------|-----------|
| H | 1.673113  | 2.707590  | 4.651647  |
| H | 1.366195  | 0.181709  | 2.131354  |
| H | -0.320831 | 1.042260  | 0.807848  |
| C | 0.785205  | 2.348599  | -0.497389 |
| C | -0.090346 | 3.416231  | -0.269142 |
| C | 1.758255  | 2.467011  | -1.495596 |
| C | 0.027982  | 4.597174  | -1.000198 |
| H | -0.871500 | 3.322447  | 0.489612  |
| C | 1.876760  | 3.648112  | -2.228344 |
| H | 2.429982  | 1.633874  | -1.717489 |
| C | 1.017654  | 4.718032  | -1.976461 |
| H | -0.658637 | 5.423127  | -0.810192 |
| H | 2.641579  | 3.729776  | -3.001706 |
| H | 1.111275  | 5.641102  | -2.550027 |
| C | -1.486179 | 0.069361  | -1.133317 |
| H | -1.437933 | 1.154327  | -1.061638 |
| C | -2.687786 | -0.562161 | -1.250968 |
| C | -3.857382 | 0.229843  | -1.754251 |
| F | -3.826558 | 0.281308  | -3.095352 |
| F | -5.045219 | -0.283614 | -1.432268 |
| F | -3.835916 | 1.496802  | -1.324650 |
| O | -0.180982 | -1.879325 | -1.432402 |
| C | -0.290388 | -0.738745 | -1.021230 |
| H | 3.454094  | 1.759836  | 0.525155  |
| C | 5.562470  | -0.734066 | 0.468590  |
| H | 5.753968  | 0.145903  | 1.081559  |
| H | 7.598713  | -1.406223 | 0.495104  |
| H | -2.749936 | -1.639840 | -1.416482 |
| C | -0.906554 | -3.614535 | 1.174056  |
| H | -0.566025 | -3.475565 | 2.209633  |
| H | -1.099363 | -4.676218 | 0.985227  |
| H | -0.127573 | -3.250436 | 0.490005  |
| C | -2.150689 | -1.622317 | 1.226119  |
| O | -2.132675 | -2.942883 | 0.948477  |
| O | -1.119764 | -1.039780 | 1.559887  |
| C | -3.571360 | 0.425396  | 1.601668  |
| C | -4.691229 | -1.625608 | 0.916494  |



|   |           |           |          |
|---|-----------|-----------|----------|
| C | -5.082306 | 0.723555  | 1.471284 |
| H | -3.246529 | 0.460392  | 2.657020 |
| C | -5.764548 | -0.646257 | 1.402469 |
| H | -5.273141 | 1.277673  | 0.543301 |
| H | -6.648341 | -0.685229 | 0.749975 |
| C | -3.405828 | -0.961590 | 1.034946 |
| O | -4.945513 | -2.757623 | 0.527141 |
| H | -2.952250 | 1.172617  | 1.071229 |
| H | -5.453237 | 1.342287  | 2.299393 |
| H | -6.079956 | -0.996359 | 2.400377 |

-----  
 PCMopt/9\_TS\_SSd

Frequencies, energies and thermodynamic properties:

|                                                  |                  |
|--------------------------------------------------|------------------|
| Lowest Vibrational Mode (1/cm) =                 | -168.5781        |
| 2nd Lowest Vibrational Mode (1/cm) =             | 19.2849          |
| E(RM062X) (a.u.) =                               | -2267.73112753   |
| Thermal correction to Enthalpy (a.u.) =          | 0.606483         |
| Thermal correction to Gibbs Free Energy (a.u.) = | 0.502322         |
| Total Entropy (cal/Kmol) =                       | 219.224          |
| Esp(RM062X+D3) (a.u.) =                          | -2269.98637929   |
| Esp(D3) (a.u.) =                                 | -0.0086001150    |
| Esp(RM062X) (a.u.) =                             | -2269.9777791750 |

Optimised cartesian coordinates (Angstrom):

|   |          |           |           |
|---|----------|-----------|-----------|
| C | 6.632263 | -1.442120 | 0.100543  |
| C | 6.432250 | -2.584009 | -0.689180 |
| C | 5.165750 | -2.916332 | -1.158235 |
| C | 4.103820 | -2.078479 | -0.817708 |
| C | 4.305046 | -0.948479 | -0.023581 |
| H | 7.280820 | -3.219533 | -0.942618 |
| H | 5.005506 | -3.800765 | -1.775074 |
| C | 2.043667 | -0.784743 | -0.404334 |
| C | 0.627726 | 1.059093  | 0.390098  |
| C | 1.626220 | 1.108885  | 1.559096  |
| C | 3.043151 | 0.943445  | 1.041059  |
| H | 3.744929 | 0.801707  | 1.872602  |
| S | 2.417442 | -2.254258 | -1.259737 |
| N | 3.110340 | -0.254852 | 0.202007  |

|   |           |           |           |
|---|-----------|-----------|-----------|
| N | 0.831214  | -0.198907 | -0.368709 |
| C | 1.459299  | 2.349383  | 2.467944  |
| C | 2.292184  | 3.562914  | 2.043345  |
| C | 1.776201  | 1.978438  | 3.918094  |
| H | 0.394578  | 2.631319  | 2.423157  |
| H | 3.365168  | 3.380574  | 2.210633  |
| H | 2.148338  | 3.835238  | 0.988506  |
| H | 2.011825  | 4.431136  | 2.655839  |
| H | 1.112298  | 1.181633  | 4.281633  |
| H | 2.816195  | 1.629482  | 4.016973  |
| H | 1.655442  | 2.852180  | 4.573520  |
| H | 1.396077  | 0.222604  | 2.171878  |
| H | -0.369282 | 0.961752  | 0.839803  |
| C | 0.661593  | 2.272005  | -0.515909 |
| C | -0.242688 | 3.315909  | -0.290317 |
| C | 1.605031  | 2.395570  | -1.541037 |
| C | -0.181600 | 4.480622  | -1.053323 |
| H | -1.001980 | 3.217818  | 0.489914  |
| C | 1.666653  | 3.561346  | -2.304754 |
| H | 2.298081  | 1.579709  | -1.761420 |
| C | 0.779193  | 4.608579  | -2.057238 |
| H | -0.890285 | 5.288252  | -0.866102 |
| H | 2.409036  | 3.647877  | -3.099035 |
| H | 0.827861  | 5.519297  | -2.655460 |
| C | -1.493477 | -0.036506 | -1.147385 |
| H | -1.451904 | 1.048608  | -1.087011 |
| C | -2.690365 | -0.664207 | -1.288971 |
| C | -3.849338 | 0.156093  | -1.779418 |
| F | -3.845355 | 0.178109  | -3.121039 |
| F | -5.045466 | -0.302179 | -1.418125 |
| F | -3.768816 | 1.429973  | -1.375930 |
| O | -0.138587 | -1.956533 | -1.445413 |
| C | -0.282632 | -0.826481 | -1.024092 |
| H | 3.374820  | 1.808349  | 0.447439  |
| C | 5.574842  | -0.607329 | 0.445430  |
| H | 5.739778  | 0.283236  | 1.050618  |
| H | 7.635519  | -1.199120 | 0.450884  |

|   |           |           |           |
|---|-----------|-----------|-----------|
| H | -2.767559 | -1.741826 | -1.449311 |
| C | -0.112910 | -2.451213 | 1.723162  |
| H | 0.202936  | -2.887227 | 0.764104  |
| H | 0.712354  | -1.889883 | 2.177891  |
| H | -0.410584 | -3.270630 | 2.391469  |
| C | -2.350709 | -2.098678 | 1.081111  |
| O | -1.181116 | -1.539055 | 1.538025  |
| O | -2.370331 | -3.271992 | 0.753568  |
| C | -3.309173 | 0.223479  | 1.669547  |
| C | -4.796752 | -1.560517 | 0.956141  |
| C | -4.744133 | 0.794569  | 1.594551  |
| H | -2.955650 | 0.161297  | 2.714093  |
| C | -5.663907 | -0.426180 | 1.512423  |
| H | -4.853987 | 1.399723  | 0.685204  |
| H | -6.561480 | -0.283305 | 0.893900  |
| C | -3.416131 | -1.137029 | 1.034827  |
| O | -5.260624 | -2.627487 | 0.571355  |
| H | -2.584616 | 0.876444  | 1.144747  |
| H | -4.974415 | 1.447639  | 2.447128  |
| H | -6.004210 | -0.749912 | 2.511023  |

-----  
 PCMopt/9\_TS\_SSe

Frequencies, energies and thermodynamic properties:

|                                                  |                  |
|--------------------------------------------------|------------------|
| Lowest Vibrational Mode (1/cm) =                 | -132.9832        |
| 2nd Lowest Vibrational Mode (1/cm) =             | 9.8834           |
| E(RM062X) (a.u.) =                               | -2267.72372193   |
| Thermal correction to Enthalpy (a.u.) =          | 0.606075         |
| Thermal correction to Gibbs Free Energy (a.u.) = | 0.498630         |
| Total Entropy (cal/Kmol) =                       | 226.136          |
| Esp(RM062X+D3) (a.u.) =                          | -2269.98096017   |
| Esp(D3) (a.u.) =                                 | -0.0083006621    |
| Esp(RM062X) (a.u.) =                             | -2269.9726595079 |

Optimised cartesian coordinates (Angstrom):

|   |          |           |           |
|---|----------|-----------|-----------|
| C | 6.646068 | -2.128282 | 0.311991  |
| C | 6.303982 | -3.340712 | -0.305391 |
| C | 4.997368 | -3.594493 | -0.708752 |
| C | 4.040764 | -2.605333 | -0.479771 |

|   |           |           |           |
|---|-----------|-----------|-----------|
| C | 4.383170  | -1.404272 | 0.143197  |
| H | 7.072672  | -4.094767 | -0.474850 |
| H | 4.726825  | -4.533896 | -1.191272 |
| C | 2.144083  | -1.048215 | -0.233139 |
| C | 0.968907  | 1.039548  | 0.289272  |
| C | 1.974056  | 1.126501  | 1.450415  |
| C | 3.357399  | 0.735682  | 0.962701  |
| H | 4.048123  | 0.617895  | 1.807493  |
| S | 2.333666  | -2.654841 | -0.871763 |
| N | 3.276208  | -0.559082 | 0.281990  |
| N | 1.002415  | -0.331948 | -0.270279 |
| C | 1.951973  | 2.485455  | 2.188596  |
| C | 2.910937  | 3.533145  | 1.614911  |
| C | 2.233825  | 2.277139  | 3.678026  |
| H | 0.924201  | 2.875774  | 2.098204  |
| H | 3.958097  | 3.257614  | 1.814697  |
| H | 2.792256  | 3.677412  | 0.532088  |
| H | 2.731240  | 4.500364  | 2.104429  |
| H | 1.490111  | 1.611180  | 4.138168  |
| H | 3.230733  | 1.835456  | 3.832548  |
| H | 2.209940  | 3.237921  | 4.210794  |
| H | 1.652505  | 0.353325  | 2.168530  |
| H | -0.027570 | 1.149279  | 0.736960  |
| C | 1.140040  | 2.093388  | -0.784417 |
| C | 0.376614  | 3.263990  | -0.712680 |
| C | 2.072739  | 1.948362  | -1.816655 |
| C | 0.565881  | 4.289286  | -1.637473 |
| H | -0.371454 | 3.377094  | 0.076391  |
| C | 2.262811  | 2.974813  | -2.741990 |
| H | 2.656521  | 1.029912  | -1.917161 |
| C | 1.515872  | 4.149247  | -2.649808 |
| H | -0.034053 | 5.197494  | -1.569188 |
| H | 2.995427  | 2.852332  | -3.540561 |
| H | 1.665394  | 4.950323  | -3.374739 |
| C | -1.326272 | -0.038893 | -1.006180 |
| H | -1.179544 | 1.036883  | -1.095743 |
| C | -2.571416 | -0.573771 | -1.095355 |

C -3.672025 0.228379 -1.719363  
 F -3.563246 0.184070 -3.060210  
 F -4.883548 -0.228903 -1.427811  
 F -3.613434 1.518588 -1.379563  
 O -0.177304 -2.113340 -1.060622  
 C -0.193285 -0.926939 -0.801157  
 H 3.779062 1.475029 0.265500  
 C 5.693925 -1.142331 0.545930  
 H 5.968399 -0.199578 1.017504  
 H 7.678376 -1.950585 0.613691  
 H -2.715903 -1.656901 -1.081183  
 C -6.406304 -2.732948 0.283740  
 H -6.320599 -3.629021 0.913858  
 H -7.444553 -2.384636 0.268529  
 H -6.086183 -2.994481 -0.735488  
 C -4.304689 -1.889961 0.877953  
 O -5.632137 -1.666742 0.795358  
 O -3.842983 -3.000643 0.647919  
 C -2.186034 -0.924071 1.916021  
 C -3.980654 0.621795 1.394776  
 C -1.968934 0.385790 2.703506  
 H -2.169133 -1.812743 2.565179  
 C -2.793013 1.423017 1.943421  
 H -0.905490 0.651577 2.807491  
 H -2.242494 1.813286 1.065190  
 C -3.511931 -0.737231 1.232033  
 O -5.063650 1.128525 1.129211  
 H -1.352879 -1.065664 1.199807  
 H -2.374413 0.277674 3.720873  
 H -3.129133 2.284409 2.535700

-----

PCMopt/9\_TS\_SSf

Frequencies, energies and thermodynamic properties:

Lowest Vibrational Mode (1/cm) = -87.4611  
 2nd Lowest Vibrational Mode (1/cm) = 19.4323  
 E(RM062X) (a.u.) = -2267.72360889  
 Thermal correction to Enthalpy (a.u.) = 0.606045

Thermal correction to Gibbs Free Energy (a.u.) = 0.499743  
Total Entropy (cal/Kmol) = 223.730  
Esp(RM062X+D3) (a.u.) = -2269.98181968  
Esp(D3) (a.u.) = -0.0083321942  
Esp(RM062X) (a.u.) = -2269.9734874858

Optimised cartesian coordinates (Angstrom):

C 6.532986 -2.151274 0.253144  
C 6.165360 -3.345139 -0.385733  
C 4.852326 -3.567338 -0.786360  
C 3.915000 -2.565921 -0.531654  
C 4.282649 -1.383951 0.112757  
H 6.919311 -4.109388 -0.574587  
H 4.562234 -4.491704 -1.286085  
C 2.048595 -0.979440 -0.243175  
C 0.913080 1.120478 0.330574  
C 1.935236 1.173582 1.478955  
C 3.304629 0.761621 0.970916  
H 4.001515 0.619880 1.806813  
S 2.206681 -2.573995 -0.919614  
N 3.192198 -0.521790 0.274215  
N 0.918218 -0.241840 -0.255234  
C 1.952350 2.526107 2.229762  
C 2.929121 3.557288 1.655918  
C 2.244130 2.296157 3.713945  
H 0.933729 2.941366 2.154101  
H 3.972168 3.257146 1.841580  
H 2.801960 3.715122 0.575844  
H 2.776229 4.523407 2.156628  
H 1.487709 1.644851 4.174062  
H 3.230914 1.827583 3.853838  
H 2.250504 3.251890 4.256249  
H 1.605710 0.401275 2.193878  
H -0.074266 1.237798 0.796504  
C 1.088727 2.187640 -0.729331  
C 0.345618 3.369477 -0.633503  
C 2.009675 2.042315 -1.772161  
C 0.543856 4.404617 -1.545446

H -0.393767 3.483185 0.163432  
C 2.208274 3.078416 -2.684763  
H 2.578060 1.116351 -1.890751  
C 1.481857 4.263557 -2.568737  
H -0.040132 5.321626 -1.458711  
H 2.931400 2.955253 -3.491827  
H 1.637892 5.072378 -3.283626  
C -1.410116 0.109955 -0.984954  
H -1.273833 1.190084 -0.959340  
C -2.639799 -0.419793 -1.182351  
C -3.744688 0.440652 -1.713244  
F -3.603599 0.593104 -3.043604  
F -4.947836 -0.078354 -1.520281  
F -3.724151 1.671528 -1.192198  
O -0.279702 -1.966453 -1.135317  
C -0.279384 -0.795342 -0.817373  
H 3.733808 1.501009 0.278366  
C 5.600394 -1.153176 0.512159  
H 5.894602 -0.224632 0.999758  
H 7.570166 -1.998160 0.551596  
H -2.772891 -1.498022 -1.288650  
C -3.900782 -4.270874 0.254792  
H -4.354740 -4.187510 -0.742943  
H -3.067900 -4.981803 0.226294  
H -4.671524 -4.626443 0.953445  
C -4.251861 -1.996830 0.773206  
O -3.361702 -3.033488 0.674303  
O -5.420357 -2.170664 0.481139  
C -2.278687 -0.782298 1.926120  
C -4.287993 0.464371 1.416381  
C -2.312854 0.492239 2.795155  
H -2.099597 -1.693259 2.515579  
C -3.269777 1.421465 2.051403  
H -1.314307 0.924271 2.961688  
H -2.755540 1.944815 1.223315  
C -3.602111 -0.790676 1.217387  
O -5.438148 0.791611 1.145268

H -1.424446 -0.713367 1.217815  
H -2.733625 0.252768 3.783877  
H -3.766471 2.179701 2.671666

-----

PCMopt/19\_TS\_RRa

Frequencies, energies and thermodynamic properties:

Lowest Vibrational Mode (1/cm) = -136.5143  
2nd Lowest Vibrational Mode (1/cm) = 9.3205  
E(RM062X) (a.u.) = -2588.52457405  
Thermal correction to Enthalpy (a.u.) = 0.663548  
Thermal correction to Gibbs Free Energy (a.u.) = 0.547937  
Total Entropy (cal/Kmol) = 243.324  
Esp(RM062X+D3) (a.u.) = -2591.12996736  
Esp(D3) (a.u.) = -0.0098726915  
Esp(RM062X) (a.u.) = -2591.1200946685

Optimised cartesian coordinates (Angstrom):

C 6.749435 -2.650684 -0.973020  
C 6.124040 -3.886376 -0.749837  
C 4.824370 -3.951192 -0.258886  
C 4.166393 -2.750036 0.006382  
C 4.794883 -1.522932 -0.208467  
H 6.661440 -4.809593 -0.966875  
H 4.332376 -4.908723 -0.086955  
C 2.742622 -0.805517 0.544445  
C 2.089273 1.551760 0.781783  
C 3.592366 1.765474 1.040122  
C 4.404121 0.942863 0.056632  
H 5.468894 0.963975 0.320995  
S 2.541092 -2.533029 0.623312  
N 3.961924 -0.449950 0.127200  
N 1.793050 0.099191 0.852164  
C 4.021932 3.251373 1.068071  
C 4.449861 3.811943 -0.292230  
C 5.143232 3.448571 2.090402  
H 3.150819 3.828123 1.418239  
H 5.406082 3.371347 -0.614808  
H 3.705646 3.638212 -1.081791



|   |           |           |           |
|---|-----------|-----------|-----------|
| H | 4.604889  | 4.896708  | -0.208871 |
| H | 4.820496  | 3.157306  | 3.099722  |
| H | 6.027023  | 2.846309  | 1.827067  |
| H | 5.455871  | 4.501688  | 2.119890  |
| H | 3.777870  | 1.348648  | 2.043584  |
| H | 1.565632  | 2.003240  | 1.633883  |
| C | 1.582776  | 2.176897  | -0.500139 |
| C | 1.065449  | 3.476831  | -0.460882 |
| C | 1.679698  | 1.515836  | -1.727182 |
| C | 0.691561  | 4.124336  | -1.636685 |
| H | 0.956043  | 3.989336  | 0.498079  |
| C | 1.302789  | 2.162926  | -2.903976 |
| H | 2.020756  | 0.479495  | -1.773411 |
| C | 0.819678  | 3.470609  | -2.862972 |
| H | 0.293644  | 5.138992  | -1.594056 |
| H | 1.381506  | 1.638103  | -3.856943 |
| H | 0.526592  | 3.974255  | -3.785149 |
| C | -0.564259 | 0.628143  | 1.362784  |
| H | -0.440302 | 1.667113  | 1.068973  |
| C | -1.785991 | 0.140727  | 1.695554  |
| C | -2.899674 | 1.044612  | 2.129462  |
| F | -2.765592 | 1.325359  | 3.435851  |
| F | -2.922916 | 2.209401  | 1.486380  |
| F | -4.099287 | 0.473769  | 1.991655  |
| O | 0.340894  | -1.549600 | 1.447605  |
| C | 0.490766  | -0.358908 | 1.233860  |
| H | 4.291686  | 1.298824  | -0.978264 |
| C | 6.096907  | -1.451734 | -0.707480 |
| H | 6.585660  | -0.496173 | -0.893184 |
| H | 7.766251  | -2.625208 | -1.365111 |
| H | -1.884699 | -0.876657 | 2.072290  |
| C | -0.508416 | -3.246824 | -1.742290 |
| H | 0.312466  | -3.158127 | -1.017886 |
| H | -0.784050 | -4.297822 | -1.876562 |
| H | -0.180857 | -2.817705 | -2.699238 |
| C | -1.523271 | -1.269749 | -0.989540 |
| O | -1.665230 | -2.586562 | -1.260701 |

O -0.489961 -0.672324 -1.233926  
 C -3.067303 0.667302 -0.922355  
 C -2.709979 -0.656930 -0.429873  
 O -2.332212 1.585101 -1.268343  
 N -3.919586 -1.406103 -0.221601  
 C -5.016771 -0.595047 -0.573355  
 C -6.394045 -0.849372 -0.529312  
 C -4.547124 0.662754 -0.978736  
 C -7.254096 0.180917 -0.912975  
 H -6.776261 -1.815416 -0.217256  
 C -5.414197 1.683644 -1.356020  
 C -6.784089 1.436754 -1.324320  
 H -8.329707 -0.004741 -0.894549  
 H -5.007750 2.649063 -1.663807  
 H -7.493061 2.212156 -1.617126  
 C -4.063956 -2.595898 0.468851  
 O -5.146710 -3.150152 0.534368  
 C -2.875881 -3.200448 1.183110  
 H -2.677189 -4.180909 0.730223  
 H -1.952507 -2.618301 1.157828  
 H -3.193125 -3.371248 2.221202

-----  
 PCMopt/19\_TS\_RRb

Frequencies, energies and thermodynamic properties:

Lowest Vibrational Mode (1/cm) = -156.4280  
 2nd Lowest Vibrational Mode (1/cm) = 22.9292  
 E(RM062X) (a.u.) = -2588.52646284  
 Thermal correction to Enthalpy (a.u.) = 0.663325  
 Thermal correction to Gibbs Free Energy (a.u.) = 0.549911  
 Total Entropy (cal/Kmol) = 238.700  
 Esp(RM062X+D3) (a.u.) = -2591.13163861  
 Esp(D3) (a.u.) = -0.0108730783  
 Esp(RM062X) (a.u.) = -2591.1207655317

Optimised cartesian coordinates (Angstrom):

C -5.928766 -2.685738 0.446967  
 C -5.216215 -3.855498 0.143716  
 C -3.917261 -3.793671 -0.350528

C -3.347822 -2.533292 -0.534287  
C -4.062310 -1.371403 -0.234873  
H -5.684416 -4.827423 0.300014  
H -3.357512 -4.699713 -0.584997  
C -2.060536 -0.469977 -0.907031  
C -1.514566 1.923737 -0.832604  
C -3.015851 2.100349 -1.133142  
C -3.828913 1.130393 -0.293055  
H -4.877573 1.124982 -0.618086  
S -1.745548 -2.162100 -1.135290  
N -3.304152 -0.222206 -0.481700  
N -1.149465 0.507976 -1.073726  
C -3.514261 3.559381 -1.006638  
C -4.017760 3.939374 0.389705  
C -4.605519 3.827570 -2.045246  
H -2.658162 4.209173 -1.250687  
H -4.964421 3.425697 0.618774  
H -3.297159 3.705774 1.185805  
H -4.218614 5.019247 0.424487  
H -4.234164 3.667581 -3.067139  
H -5.470246 3.163840 -1.887510  
H -4.963828 4.863555 -1.967690  
H -3.137082 1.799514 -2.186503  
H -0.973466 2.503712 -1.591712  
C -1.100350 2.404686 0.542132  
C -0.614667 3.711280 0.681561  
C -1.258362 1.609256 1.679953  
C -0.342634 4.231478 1.944779  
H -0.454382 4.328479 -0.205873  
C -0.985063 2.130507 2.945658  
H -1.581143 0.567908 1.592820  
C -0.541565 3.444885 3.081493  
H 0.030074 5.251982 2.041706  
H -1.100820 1.495552 3.823426  
H -0.329460 3.850791 4.071462  
C 1.225592 1.133221 -1.258615  
H 1.026705 2.094460 -0.794446

C 2.507059 0.744456 -1.524922  
C 3.570247 1.814117 -1.513783  
F 3.897799 2.127763 -2.772871  
F 3.157255 2.941511 -0.924657  
F 4.703585 1.464085 -0.901731  
O 0.389547 -0.968470 -1.884552  
C 0.187637 0.153525 -1.457063  
H -3.795999 1.376920 0.778647  
C -5.364818 -1.427485 0.264139  
H -5.919057 -0.523590 0.514336  
H -6.943368 -2.760114 0.838661  
H 2.737571 -0.124624 -2.145752  
C 6.605697 -0.823689 -0.064427  
H 6.916031 -1.367410 0.838020  
H 7.192625 -1.158537 -0.925620  
H 6.760648 0.251542 0.102007  
C 4.357602 -0.740135 0.564143  
O 5.250358 -1.086694 -0.377902  
O 4.701990 -0.302921 1.646903  
C 2.678180 -2.131706 -0.699505  
C 2.981935 -0.967524 0.141703  
O 3.225446 -2.487434 -1.734024  
N 1.977364 -0.910304 1.161826  
C 1.171913 -2.066949 1.097676  
C 0.121639 -2.501653 1.917516  
C 1.566765 -2.833492 -0.007684  
C -0.467855 -3.732201 1.615548  
H -0.198324 -1.919391 2.775443  
C 0.967097 -4.051332 -0.305428  
C -0.054108 -4.511004 0.526283  
H -1.271507 -4.097634 2.258132  
H 1.304726 -4.623136 -1.172006  
H -0.533465 -5.471858 0.332268  
C 1.800314 0.085264 2.109306  
O 1.094254 -0.105375 3.083158  
C 2.428168 1.435740 1.876258  
H 2.911034 1.749072 2.810184

H 3.158484 1.463797 1.068996  
H 1.604436 2.137310 1.669102

-----

PCMopt/19\_TS\_RRc

Frequencies, energies and thermodynamic properties:

Lowest Vibrational Mode (1/cm) = -96.0199  
2nd Lowest Vibrational Mode (1/cm) = 14.9126  
E(RM062X) (a.u.) = -2588.51951277  
Thermal correction to Enthalpy (a.u.) = 0.663060  
Thermal correction to Gibbs Free Energy (a.u.) = 0.548193  
Total Entropy (cal/Kmol) = 241.758  
Esp(RM062X+D3) (a.u.) = -2591.12893432  
Esp(D3) (a.u.) = -0.0108308026  
Esp(RM062X) (a.u.) = -2591.1181035174

Optimised cartesian coordinates (Angstrom):

C -6.350237 -2.548257 -0.131041  
C -5.697293 -3.775706 -0.322682  
C -4.336707 -3.825971 -0.604617  
C -3.643606 -2.617564 -0.690197  
C -4.298067 -1.398878 -0.505143  
H -6.263209 -4.704255 -0.246641  
H -3.824155 -4.776719 -0.752227  
C -2.150959 -0.666275 -0.867964  
C -1.457674 1.682073 -0.728633  
C -2.873157 1.967121 -1.266678  
C -3.882889 1.071059 -0.574072  
H -4.853202 1.117071 -1.085553  
S -1.943360 -2.381829 -1.031192  
N -3.421761 -0.317154 -0.638381  
N -1.153940 0.245385 -0.931078  
C -3.268399 3.462377 -1.220155  
C -3.964395 3.897317 0.073498  
C -4.146026 3.804671 -2.426012  
H -2.333630 4.038967 -1.315293  
H -4.972812 3.460560 0.143422  
H -3.405113 3.620976 0.978391  
H -4.084109 4.989654 0.073555

H -3.622147 3.607470 -3.371710  
H -5.073231 3.210283 -2.418098  
H -4.431060 4.865729 -2.405532  
H -2.841327 1.666383 -2.326521  
H -0.774127 2.231932 -1.384532  
C -1.246567 2.127029 0.702507  
C -0.663902 3.376636 0.944391  
C -1.737924 1.383770 1.782703  
C -0.631000 3.904322 2.234812  
H -0.252639 3.953805 0.112435  
C -1.708446 1.913241 3.073288  
H -2.150710 0.383501 1.630097  
C -1.170797 3.181285 3.299164  
H -0.183303 4.883672 2.407735  
H -2.105080 1.328911 3.904991  
H -1.154127 3.596084 4.307733  
C 1.250403 0.783841 -1.189034  
H 1.108679 1.790471 -0.802809  
C 2.471888 0.383277 -1.612250  
C 3.529537 1.411535 -1.918488  
F 3.653055 1.478184 -3.259068  
F 3.201860 2.635535 -1.510240  
F 4.741969 1.136167 -1.451716  
O 0.336373 -1.354568 -1.554138  
C 0.170523 -0.193656 -1.243945  
H -4.031695 1.343907 0.480776  
C -5.663782 -1.342533 -0.218621  
H -6.174919 -0.393963 -0.058515  
H -7.416701 -2.535989 0.094326  
H 2.626274 -0.593674 -2.072744  
C 6.703450 -1.272060 -0.910888  
H 7.239128 -1.683935 -0.044390  
H 6.994693 -1.808061 -1.820386  
H 6.959895 -0.207087 -1.005153  
C 4.755614 -0.869397 0.318215  
O 5.306107 -1.437017 -0.776825  
O 5.433935 -0.294618 1.145567

|   |           |           |           |
|---|-----------|-----------|-----------|
| C | 2.698377  | -2.332219 | -0.011537 |
| C | 3.321672  | -1.083481 | 0.364792  |
| O | 3.029650  | -3.169697 | -0.852660 |
| N | 2.554131  | -0.468962 | 1.397678  |
| C | 1.457793  | -1.300005 | 1.706848  |
| C | 0.393551  | -1.164837 | 2.611790  |
| C | 1.532317  | -2.448373 | 0.900758  |
| C | -0.533163 | -2.205568 | 2.701181  |
| H | 0.266290  | -0.299213 | 3.253174  |
| C | 0.609672  | -3.483609 | 1.004796  |
| C | -0.430624 | -3.365551 | 1.921955  |
| H | -1.354000 | -2.106875 | 3.414393  |
| H | 0.712730  | -4.356280 | 0.356381  |
| H | -1.173253 | -4.158197 | 2.025783  |
| C | 2.689286  | 0.887086  | 1.677945  |
| O | 3.397692  | 1.595520  | 0.994721  |
| C | 1.954288  | 1.438544  | 2.872144  |
| H | 0.890504  | 1.568211  | 2.631241  |
| H | 2.042513  | 0.784499  | 3.748402  |
| H | 2.380032  | 2.423164  | 3.091722  |

-----  
 PCMopt/19\_TS\_RRd

Frequencies, energies and thermodynamic properties:

|                                                  |                  |
|--------------------------------------------------|------------------|
| Lowest Vibrational Mode (1/cm) =                 | -133.9823        |
| 2nd Lowest Vibrational Mode (1/cm) =             | 21.5280          |
| E(RM062X) (a.u.) =                               | -2588.52198019   |
| Thermal correction to Enthalpy (a.u.) =          | 0.663262         |
| Thermal correction to Gibbs Free Energy (a.u.) = | 0.549315         |
| Total Entropy (cal/Kmol) =                       | 239.822          |
| Esp(RM062X+D3) (a.u.) =                          | -2591.12792915   |
| Esp(D3) (a.u.) =                                 | -0.0096146037    |
| Esp(RM062X) (a.u.) =                             | -2591.1183145463 |

Optimised cartesian coordinates (Angstrom):

|   |          |           |           |
|---|----------|-----------|-----------|
| C | 6.829900 | -2.537681 | -1.112850 |
| C | 6.218007 | -3.791594 | -0.969838 |
| C | 4.919114 | -3.901848 | -0.484110 |
| C | 4.246880 | -2.727880 | -0.144272 |

|   |           |           |           |
|---|-----------|-----------|-----------|
| C | 4.862408  | -1.483037 | -0.279975 |
| H | 6.765210  | -4.693208 | -1.245422 |
| H | 4.438301  | -4.873958 | -0.373848 |
| C | 2.800932  | -0.835809 | 0.512803  |
| C | 2.105174  | 1.494225  | 0.823038  |
| C | 3.597929  | 1.725960  | 1.125633  |
| C | 4.447637  | 0.955898  | 0.131957  |
| H | 5.503750  | 0.973718  | 0.430130  |
| S | 2.621360  | -2.568159 | 0.492143  |
| N | 4.018366  | -0.442286 | 0.122012  |
| N | 1.834640  | 0.036742  | 0.850828  |
| C | 3.999133  | 3.217205  | 1.219652  |
| C | 4.456264  | 3.834907  | -0.105842 |
| C | 5.086988  | 3.396222  | 2.280754  |
| H | 3.107718  | 3.765758  | 1.564241  |
| H | 5.431493  | 3.426320  | -0.413317 |
| H | 3.740798  | 3.673617  | -0.923976 |
| H | 4.584455  | 4.919068  | 0.020234  |
| H | 4.740536  | 3.064696  | 3.269584  |
| H | 5.987358  | 2.816933  | 2.022056  |
| H | 5.381417  | 4.452368  | 2.355696  |
| H | 3.766224  | 1.274928  | 2.117163  |
| H | 1.551733  | 1.916449  | 1.670825  |
| C | 1.625632  | 2.144362  | -0.457050 |
| C | 1.087910  | 3.435125  | -0.401528 |
| C | 1.772855  | 1.518671  | -1.698198 |
| C | 0.745225  | 4.109132  | -1.572041 |
| H | 0.939517  | 3.920205  | 0.566368  |
| C | 1.429052  | 2.192431  | -2.870245 |
| H | 2.135746  | 0.490381  | -1.761539 |
| C | 0.926261  | 3.492111  | -2.810608 |
| H | 0.331186  | 5.116673  | -1.516001 |
| H | 1.549931  | 1.695466  | -3.833621 |
| H | 0.658984  | 4.017547  | -3.728431 |
| C | -0.540104 | 0.488837  | 1.346956  |
| H | -0.419815 | 1.539097  | 1.093453  |
| C | -1.770862 | -0.017241 | 1.633877  |



|   |           |           |           |
|---|-----------|-----------|-----------|
| C | -2.864216 | 0.889848  | 2.108781  |
| F | -2.701203 | 1.149385  | 3.417133  |
| F | -2.882590 | 2.069389  | 1.486752  |
| F | -4.081025 | 0.349813  | 1.988058  |
| O | 0.444567  | -1.659395 | 1.457265  |
| C | 0.540741  | -0.466529 | 1.233399  |
| H | 4.364488  | 1.358723  | -0.888435 |
| C | 6.163709  | -1.365403 | -0.771511 |
| H | 6.641746  | -0.394248 | -0.893807 |
| H | 7.846559  | -2.475969 | -1.501363 |
| H | -1.888376 | -1.060862 | 1.928550  |
| C | -0.669438 | -3.491155 | -1.395491 |
| H | 0.091737  | -3.385214 | -0.610214 |
| H | -1.003079 | -4.531729 | -1.463414 |
| H | -0.233214 | -3.172135 | -2.352319 |
| C | -1.603713 | -1.399677 | -0.924709 |
| O | -1.813351 | -2.722204 | -1.072969 |
| O | -0.532229 | -0.885556 | -1.191675 |
| C | -3.015369 | 0.656486  | -1.003668 |
| C | -2.763638 | -0.665033 | -0.455892 |
| O | -2.218955 | 1.510387  | -1.378997 |
| N | -4.026643 | -1.324476 | -0.242773 |
| C | -5.061323 | -0.449093 | -0.639739 |
| C | -6.457391 | -0.584377 | -0.649644 |
| C | -4.490777 | 0.757300  | -1.078168 |
| C | -7.222328 | 0.491819  | -1.103033 |
| H | -6.970169 | -1.488322 | -0.339759 |
| C | -5.260683 | 1.825451  | -1.527198 |
| C | -6.645616 | 1.691734  | -1.538615 |
| H | -8.308013 | 0.382188  | -1.120736 |
| H | -4.763621 | 2.738993  | -1.859241 |
| H | -7.281034 | 2.507114  | -1.885771 |
| C | -4.135472 | -2.379064 | 0.657116  |
| O | -3.182476 | -2.744731 | 1.313758  |
| C | -5.467795 | -3.075768 | 0.780018  |
| H | -6.169531 | -2.457490 | 1.357199  |
| H | -5.908967 | -3.292385 | -0.200021 |

H -5.294616 -4.008511 1.325901

-----  
PCMopt/19\_TS\_RRe

Frequencies, energies and thermodynamic properties:

Lowest Vibrational Mode (1/cm) = -114.4746  
2nd Lowest Vibrational Mode (1/cm) = 19.1236  
E(RM062X) (a.u.) = -2588.51813039  
Thermal correction to Enthalpy (a.u.) = 0.663187  
Thermal correction to Gibbs Free Energy (a.u.) = 0.548246  
Total Entropy (cal/Kmol) = 241.913  
Esp(RM062X+D3) (a.u.) = -2591.12735128  
Esp(D3) (a.u.) = -0.0108287828  
Esp(RM062X) (a.u.) = -2591.1165224972

Optimised cartesian coordinates (Angstrom):

C -6.473427 -2.333457 0.086748  
C -5.886195 -3.585439 -0.152415  
C -4.544620 -3.691280 -0.502198  
C -3.802860 -2.513703 -0.606954  
C -4.392792 -1.270358 -0.375229  
H -6.488473 -4.489292 -0.060064  
H -4.083212 -4.661476 -0.687142  
C -2.235126 -0.626400 -0.832992  
C -1.435454 1.688493 -0.704132  
C -2.861301 2.038498 -1.172077  
C -3.873525 1.179535 -0.437553  
H -4.865329 1.273247 -0.898735  
S -2.112138 -2.347651 -1.028322  
N -3.477069 -0.226165 -0.538374  
N -1.203459 0.241801 -0.931061  
C -3.190789 3.548480 -1.095894  
C -3.810035 3.999261 0.231034  
C -4.106326 3.939023 -2.258083  
H -2.238051 4.086896 -1.228486  
H -4.832928 3.606530 0.340869  
H -3.225141 3.688756 1.108211  
H -3.881082 5.095743 0.246349  
H -3.634201 3.729682 -3.228108

H -5.056448 3.383795 -2.212868  
H -4.345338 5.010783 -2.215997  
H -2.893231 1.745941 -2.234202  
H -0.759115 2.214245 -1.387014  
C -1.141053 2.113753 0.718493  
C -0.506341 3.341895 0.938883  
C -1.606437 1.380753 1.816921  
C -0.395810 3.860448 2.228530  
H -0.115960 3.910036 0.090933  
C -1.498138 1.900690 3.107317  
H -2.060317 0.396132 1.679713  
C -0.908489 3.148684 3.313778  
H 0.091673 4.823478 2.384789  
H -1.874594 1.324444 3.953926  
H -0.830613 3.556142 4.322468  
C 1.208180 0.676643 -1.284535  
H 1.122721 1.684523 -0.885699  
C 2.398125 0.232807 -1.759811  
C 3.469271 1.230668 -2.123431  
F 3.538921 1.271620 -3.469353  
F 3.185098 2.469625 -1.725826  
F 4.693019 0.937785 -1.701873  
O 0.182410 -1.412364 -1.647462  
C 0.086453 -0.250683 -1.309976  
H -3.957530 1.446576 0.625967  
C -5.738743 -1.158042 -0.020403  
H -6.198388 -0.190261 0.176539  
H -7.525825 -2.277423 0.365345  
H 2.489249 -0.739232 -2.247758  
C 6.779227 -0.280249 0.772953  
H 6.972565 0.254144 -0.167897  
H 7.125783 0.317992 1.622122  
H 7.316618 -1.238375 0.745861  
C 4.757632 -1.140181 -0.031413  
O 5.390935 -0.476841 0.958655  
O 5.373949 -1.664205 -0.938038  
C 2.622507 -2.432375 -0.210015

C 3.319802 -1.216137 0.143670  
 O 2.884365 -3.268377 -1.075347  
 N 2.631318 -0.577776 1.220069  
 C 1.516455 -1.368053 1.574609  
 C 0.506923 -1.202351 2.536414  
 C 1.498637 -2.508459 0.754256  
 C -0.460430 -2.201369 2.658326  
 H 0.451409 -0.344316 3.197608  
 C 0.536205 -3.503081 0.890756  
 C -0.451390 -3.352337 1.858928  
 H -1.238672 -2.077110 3.414054  
 H 0.567720 -4.369323 0.226654  
 H -1.223908 -4.111734 1.989114  
 C 2.808737 0.777378 1.485877  
 O 3.498808 1.468240 0.767528  
 C 2.144084 1.350062 2.710510  
 H 1.072037 1.495515 2.521213  
 H 2.265418 0.700995 3.586486  
 H 2.597021 2.328755 2.899885

-----  
 PCMopt/19\_TS\_RRg

Frequencies, energies and thermodynamic properties:

Lowest Vibrational Mode (1/cm) = -204.9316  
 2nd Lowest Vibrational Mode (1/cm) = 9.2522  
 E(RM062X) (a.u.) = -2588.51657620  
 Thermal correction to Enthalpy (a.u.) = 0.663288  
 Thermal correction to Gibbs Free Energy (a.u.) = 0.548083  
 Total Entropy (cal/Kmol) = 242.469  
 Esp(RM062X+D3) (a.u.) = -2591.11880915  
 Esp(D3) (a.u.) = -0.0100676557  
 Esp(RM062X) (a.u.) = -2591.1087414943

Optimised cartesian coordinates (Angstrom):

C -6.471117 2.371880 -1.578028  
 C -5.830264 3.617613 -1.627978  
 C -4.545579 3.781131 -1.117726  
 C -3.917278 2.669582 -0.557796  
 C -4.563129 1.433395 -0.500876

|   |           |           |           |
|---|-----------|-----------|-----------|
| H | -6.341963 | 4.470201  | -2.074738 |
| H | -4.042062 | 4.747391  | -1.156728 |
| C | -2.547678 | 0.887719  | 0.469351  |
| C | -1.895206 | -1.376489 | 1.099980  |
| C | -3.393073 | -1.563073 | 1.410188  |
| C | -4.231267 | -0.911367 | 0.324386  |
| H | -5.284199 | -0.855769 | 0.631107  |
| S | -2.318655 | 2.589355  | 0.161973  |
| N | -3.764294 | 0.458245  | 0.106528  |
| N | -1.617657 | 0.070271  | 0.975130  |
| C | -3.797998 | -3.031498 | 1.680903  |
| C | -4.233115 | -3.813445 | 0.437460  |
| C | -4.900635 | -3.081968 | 2.740646  |
| H | -2.909707 | -3.530140 | 2.102535  |
| H | -5.201851 | -3.448385 | 0.062041  |
| H | -3.502398 | -3.759004 | -0.381444 |
| H | -4.366045 | -4.872373 | 0.699828  |
| H | -4.571135 | -2.624455 | 3.684013  |
| H | -5.800247 | -2.547196 | 2.397403  |
| H | -5.190464 | -4.122046 | 2.945814  |
| H | -3.565774 | -0.996231 | 2.339565  |
| H | -1.349981 | -1.705814 | 1.993028  |
| C | -1.409302 | -2.173314 | -0.093921 |
| C | -0.806472 | -3.416343 | 0.124553  |
| C | -1.627244 | -1.744870 | -1.407578 |
| C | -0.470512 | -4.241600 | -0.948486 |
| H | -0.605209 | -3.748133 | 1.146416  |
| C | -1.302943 | -2.573180 | -2.480748 |
| H | -2.038611 | -0.753177 | -1.606764 |
| C | -0.733422 | -3.827602 | -2.254023 |
| H | -0.004837 | -5.210245 | -0.762362 |
| H | -1.486372 | -2.231676 | -3.500514 |
| H | -0.478929 | -4.473226 | -3.095888 |
| C | 0.730258  | -0.317274 | 1.569113  |
| H | 0.627558  | -1.363814 | 1.292193  |
| C | 1.983496  | 0.216432  | 1.791145  |
| C | 3.090205  | -0.739408 | 2.120469  |

|   |           |           |           |
|---|-----------|-----------|-----------|
| F | 2.876304  | -1.345205 | 3.298066  |
| F | 3.212948  | -1.711357 | 1.211202  |
| F | 4.280588  | -0.136415 | 2.224004  |
| O | -0.240750 | 1.828115  | 1.450354  |
| C | -0.331149 | 0.612420  | 1.356118  |
| H | -4.174469 | -1.457139 | -0.629230 |
| C | -5.849020 | 1.261589  | -1.014923 |
| H | -6.349095 | 0.294198  | -0.987140 |
| H | -7.475234 | 2.265642  | -1.988983 |
| H | 2.079738  | 1.203388  | 2.246906  |
| C | 0.886990  | 4.279561  | -0.425030 |
| H | 1.613615  | 5.087694  | -0.267167 |
| H | 0.235217  | 4.514979  | -1.272256 |
| H | 0.296048  | 4.137452  | 0.490145  |
| C | 2.319572  | 2.552049  | 0.202782  |
| O | 1.547060  | 3.065430  | -0.754016 |
| O | 2.577773  | 3.167780  | 1.210432  |
| C | 1.876612  | 0.354531  | -0.973389 |
| C | 2.745689  | 1.154220  | -0.129832 |
| O | 0.646844  | 0.395811  | -1.031790 |
| N | 4.112123  | 0.783508  | -0.439614 |
| C | 4.077236  | -0.328081 | -1.312901 |
| C | 5.107412  | -1.128630 | -1.831017 |
| C | 2.746053  | -0.626911 | -1.630209 |
| C | 4.747860  | -2.200731 | -2.648225 |
| H | 6.148066  | -0.926344 | -1.607695 |
| C | 2.395363  | -1.701649 | -2.443641 |
| C | 3.412052  | -2.498797 | -2.957630 |
| H | 5.541890  | -2.828306 | -3.057331 |
| H | 1.340665  | -1.897059 | -2.647327 |
| H | 3.178553  | -3.352257 | -3.595614 |
| C | 5.313498  | 1.291010  | 0.044995  |
| O | 6.370959  | 0.833872  | -0.343883 |
| C | 5.293725  | 2.421979  | 1.037125  |
| H | 4.997170  | 3.358177  | 0.546460  |
| H | 4.589387  | 2.243770  | 1.853447  |
| H | 6.316587  | 2.521475  | 1.414630  |

-----  
PCMopt/19\_TS\_RRh

Frequencies, energies and thermodynamic properties:

|                                                  |                  |
|--------------------------------------------------|------------------|
| Lowest Vibrational Mode (1/cm) =                 | -333.8255        |
| 2nd Lowest Vibrational Mode (1/cm) =             | 16.7436          |
| E(RM062X) (a.u.) =                               | -2588.51543249   |
| Thermal correction to Enthalpy (a.u.) =          | 0.662995         |
| Thermal correction to Gibbs Free Energy (a.u.) = | 0.549329         |
| Total Entropy (cal/Kmol) =                       | 239.231          |
| Esp(RM062X+D3) (a.u.) =                          | -2591.11724781   |
| Esp(D3) (a.u.) =                                 | -0.0105205699    |
| Esp(RM062X) (a.u.) =                             | -2591.1067272401 |

Optimised cartesian coordinates (Angstrom):

|   |          |           |           |
|---|----------|-----------|-----------|
| C | 6.425106 | 2.502325  | 0.445349  |
| C | 5.783451 | 3.747430  | 0.383741  |
| C | 4.432318 | 3.839696  | 0.062905  |
| C | 3.736849 | 2.658263  | -0.193444 |
| C | 4.382504 | 1.422207  | -0.139895 |
| H | 6.348153 | 4.656196  | 0.592702  |
| H | 3.928803 | 4.805676  | 0.016525  |
| C | 2.243988 | 0.747004  | -0.666450 |
| C | 1.547573 | -1.583380 | -0.784154 |
| C | 2.972005 | -1.837268 | -1.313141 |
| C | 3.974149 | -1.016427 | -0.522451 |
| H | 4.949457 | -1.006831 | -1.027300 |
| S | 2.044895 | 2.478329  | -0.620677 |
| N | 3.511309 | 0.369445  | -0.439207 |
| N | 1.258964 | -0.137037 | -0.875805 |
| C | 3.347501 | -3.335832 | -1.393795 |
| C | 3.986872 | -3.906306 | -0.123809 |
| C | 4.263659 | -3.581261 | -2.594654 |
| H | 2.407827 | -3.883769 | -1.575246 |
| H | 4.997687 | -3.496301 | 0.027373  |
| H | 3.394793 | -3.709185 | 0.780793  |
| H | 4.092130 | -4.995468 | -0.226539 |
| H | 3.780491 | -3.282078 | -3.535362 |
| H | 5.201619 | -3.012341 | -2.496217 |

H 4.527268 -4.645749 -2.667195  
H 2.967175 -1.442727 -2.342358  
H 0.872484 -2.069086 -1.496551  
C 1.294615 -2.145489 0.599150  
C 0.629554 -3.369410 0.720028  
C 1.803569 -1.531074 1.750176  
C 0.518413 -3.997518 1.960196  
H 0.204412 -3.844157 -0.167825  
C 1.704473 -2.164169 2.987856  
H 2.265328 -0.543678 1.696478  
C 1.071860 -3.403699 3.094432  
H 0.000494 -4.954330 2.038537  
H 2.112468 -1.679390 3.875962  
H 0.994910 -3.897410 4.064179  
C -1.133495 -0.603220 -1.217851  
H -0.988734 -1.655798 -0.991213  
C -2.424817 -0.121247 -1.411949  
C -3.420069 -1.022191 -2.085211  
F -3.160668 -1.082819 -3.402337  
F -3.368508 -2.282226 -1.633691  
F -4.677526 -0.606973 -1.968017  
O -0.167984 1.546244 -1.422769  
C -0.072168 0.349040 -1.186483  
H 4.115453 -1.401541 0.497935  
C 5.736251 1.321697 0.184676  
H 6.238223 0.356526 0.241970  
H 7.482963 2.453457 0.704248  
H -2.520254 0.918520 -1.738837  
C -5.074623 -2.829293 0.913504  
H -4.788877 -3.197880 1.907803  
H -6.157439 -2.910197 0.777901  
H -4.549704 -3.418285 0.150448  
C -3.465397 -1.135288 0.891012  
O -4.761082 -1.451471 0.778542  
O -2.615913 -1.967126 1.129857  
C -4.243369 1.288614 0.254673  
C -3.211685 0.271611 0.571098



|   |           |           |           |
|---|-----------|-----------|-----------|
| O | -5.427300 | 1.158008  | 0.006488  |
| N | -2.052211 | 0.971420  | 1.035662  |
| C | -2.187041 | 2.330135  | 0.685051  |
| C | -1.275781 | 3.387086  | 0.784613  |
| C | -3.490578 | 2.565445  | 0.233501  |
| C | -1.721659 | 4.657827  | 0.421060  |
| H | -0.254766 | 3.217753  | 1.112500  |
| C | -3.926971 | 3.837337  | -0.126996 |
| C | -3.027311 | 4.895385  | -0.034828 |
| H | -1.021947 | 5.493263  | 0.486639  |
| H | -4.953850 | 3.979569  | -0.468941 |
| H | -3.329350 | 5.904637  | -0.316397 |
| C | -0.987853 | 0.548380  | 1.841078  |
| O | 0.094263  | 1.095755  | 1.738582  |
| C | -1.244768 | -0.456803 | 2.933942  |
| H | -2.298051 | -0.483553 | 3.233702  |
| H | -0.950621 | -1.460106 | 2.605748  |
| H | -0.611583 | -0.156587 | 3.778050  |

-----  
 PCMopt/19\_TS\_RRi

Frequencies, energies and thermodynamic properties:

|                                                  |                  |
|--------------------------------------------------|------------------|
| Lowest Vibrational Mode (1/cm) =                 | -262.8452        |
| 2nd Lowest Vibrational Mode (1/cm) =             | 16.9951          |
| E(RM062X) (a.u.) =                               | -2588.51185117   |
| Thermal correction to Enthalpy (a.u.) =          | 0.663294         |
| Thermal correction to Gibbs Free Energy (a.u.) = | 0.548345         |
| Total Entropy (cal/Kmol) =                       | 241.930          |
| Esp(RM062X+D3) (a.u.) =                          | -2591.11565093   |
| Esp(D3) (a.u.) =                                 | -0.0099722384    |
| Esp(RM062X) (a.u.) =                             | -2591.1056786916 |

Optimised cartesian coordinates (Angstrom):

|   |          |           |           |
|---|----------|-----------|-----------|
| C | 6.460900 | -2.410234 | -1.535560 |
| C | 5.807565 | -3.648715 | -1.596348 |
| C | 4.516427 | -3.800439 | -1.098103 |
| C | 3.893954 | -2.684992 | -0.539789 |
| C | 4.552642 | -1.455940 | -0.472177 |
| H | 6.314105 | -4.504955 | -2.042054 |

|   |           |           |           |
|---|-----------|-----------|-----------|
| H | 4.003338  | -4.761306 | -1.145720 |
| C | 2.532643  | -0.891549 | 0.479099  |
| C | 1.890752  | 1.378547  | 1.086154  |
| C | 3.384607  | 1.556761  | 1.421370  |
| C | 4.237421  | 0.889932  | 0.355792  |
| H | 5.282914  | 0.822759  | 0.685254  |
| S | 2.288951  | -2.591432 | 0.166695  |
| N | 3.758711  | -0.474252 | 0.130817  |
| N | 1.605921  | -0.065685 | 0.971023  |
| C | 3.796230  | 3.023739  | 1.689139  |
| C | 4.257911  | 3.794895  | 0.448501  |
| C | 4.881069  | 3.073313  | 2.767204  |
| H | 2.904465  | 3.531452  | 2.092398  |
| H | 5.230505  | 3.421182  | 0.092013  |
| H | 3.541075  | 3.740307  | -0.382685 |
| H | 4.393481  | 4.854554  | 0.706627  |
| H | 4.532465  | 2.623743  | 3.707532  |
| H | 5.782684  | 2.530340  | 2.442565  |
| H | 5.174617  | 4.112592  | 2.971212  |
| H | 3.535305  | 0.995637  | 2.357994  |
| H | 1.330696  | 1.721149  | 1.964906  |
| C | 1.434232  | 2.167060  | -0.124992 |
| C | 0.834082  | 3.415549  | 0.068978  |
| C | 1.683717  | 1.728572  | -1.430050 |
| C | 0.533691  | 4.236706  | -1.017838 |
| H | 0.608454  | 3.755419  | 1.083052  |
| C | 1.396005  | 2.553293  | -2.516623 |
| H | 2.094077  | 0.733230  | -1.612351 |
| C | 0.830909  | 3.813777  | -2.313118 |
| H | 0.070028  | 5.209708  | -0.850187 |
| H | 1.605351  | 2.204493  | -3.528878 |
| H | 0.605958  | 4.456729  | -3.165378 |
| C | -0.750331 | 0.330307  | 1.530064  |
| H | -0.647945 | 1.377491  | 1.254837  |
| C | -2.008554 | -0.225847 | 1.718480  |
| C | -3.135481 | 0.685061  | 2.102072  |
| F | -2.919742 | 1.235023  | 3.307278  |

|   |           |           |           |
|---|-----------|-----------|-----------|
| F | -3.302498 | 1.700563  | 1.249100  |
| F | -4.306148 | 0.040500  | 2.194545  |
| O | 0.221432  | -1.816421 | 1.450782  |
| C | 0.308808  | -0.599052 | 1.342771  |
| H | 4.208263  | 1.433756  | -0.600212 |
| C | 5.844849  | -1.295704 | -0.973542 |
| H | 6.354385  | -0.333519 | -0.936855 |
| H | 7.469814  | -2.312783 | -1.936890 |
| H | -2.081461 | -1.206996 | 2.188445  |
| C | -1.083656 | -4.409934 | -0.318652 |
| H | -1.841941 | -5.161644 | -0.062153 |
| H | -0.495359 | -4.742852 | -1.179475 |
| H | -0.433615 | -4.239399 | 0.550731  |
| C | -2.387437 | -2.567395 | 0.259606  |
| O | -1.694200 | -3.185258 | -0.699501 |
| O | -2.619748 | -3.083141 | 1.323346  |
| C | -1.830421 | -0.397266 | -0.998782 |
| C | -2.724875 | -1.161512 | -0.148680 |
| O | -0.607233 | -0.491083 | -1.087128 |
| N | -4.068206 | -0.722931 | -0.426348 |
| C | -4.003770 | 0.437808  | -1.223349 |
| C | -4.988088 | 1.331922  | -1.669365 |
| C | -2.663802 | 0.668336  | -1.573548 |
| C | -4.583372 | 2.426247  | -2.434829 |
| H | -6.042715 | 1.221335  | -1.442980 |
| C | -2.267263 | 1.765648  | -2.332206 |
| C | -3.240942 | 2.658974  | -2.765174 |
| H | -5.347801 | 3.125052  | -2.778694 |
| H | -1.208123 | 1.902956  | -2.558061 |
| H | -2.968698 | 3.534993  | -3.355139 |
| C | -5.197754 | -1.463646 | -0.091495 |
| O | -5.098470 | -2.631257 | 0.213533  |
| C | -6.533049 | -0.764125 | -0.094576 |
| H | -6.473127 | 0.219979  | 0.384985  |
| H | -6.905289 | -0.643215 | -1.121068 |
| H | -7.230578 | -1.407274 | 0.451501  |

-----

PCMopt/19\_TS\_RRj

Frequencies, energies and thermodynamic properties:

|                                                  |                  |
|--------------------------------------------------|------------------|
| Lowest Vibrational Mode (1/cm) =                 | -268.7142        |
| 2nd Lowest Vibrational Mode (1/cm) =             | 15.7602          |
| E(RM062X) (a.u.) =                               | -2588.50756871   |
| Thermal correction to Enthalpy (a.u.) =          | 0.662568         |
| Thermal correction to Gibbs Free Energy (a.u.) = | 0.547046         |
| Total Entropy (cal/Kmol) =                       | 243.136          |
| Esp(RM062X+D3) (a.u.) =                          | -2591.11209298   |
| Esp(D3) (a.u.) =                                 | -0.0105166299    |
| Esp(RM062X) (a.u.) =                             | -2591.1015763501 |

Optimised cartesian coordinates (Angstrom):

|   |           |           |           |
|---|-----------|-----------|-----------|
| C | -6.849810 | -2.033719 | 0.220553  |
| C | -6.352329 | -3.342443 | 0.141768  |
| C | -5.010347 | -3.581588 | -0.137653 |
| C | -4.176920 | -2.480713 | -0.334455 |
| C | -4.678296 | -1.180045 | -0.263634 |
| H | -7.024066 | -4.185506 | 0.304004  |
| H | -4.619174 | -4.597391 | -0.198298 |
| C | -2.461491 | -0.742550 | -0.701111 |
| C | -1.495785 | 1.500801  | -0.769547 |
| C | -2.870021 | 1.909030  | -1.331664 |
| C | -3.975075 | 1.206399  | -0.564508 |
| H | -4.936942 | 1.320441  | -1.081738 |
| S | -2.464578 | -2.484741 | -0.711945 |
| N | -3.682131 | -0.226752 | -0.500639 |
| N | -1.369188 | 0.026069  | -0.838327 |
| C | -3.074524 | 3.439877  | -1.420472 |
| C | -3.672392 | 4.079094  | -0.163261 |
| C | -3.934846 | 3.781518  | -2.638974 |
| H | -2.076863 | 3.880064  | -1.584550 |
| H | -4.723398 | 3.778432  | -0.030509 |
| H | -3.121431 | 3.823276  | 0.752380  |
| H | -3.659883 | 5.172886  | -0.269124 |
| H | -3.470722 | 3.426514  | -3.569748 |
| H | -4.932586 | 3.322202  | -2.557402 |
| H | -4.075597 | 4.868573  | -2.717895 |

H -2.886968 1.514482 -2.360661  
H -0.751433 1.892861 -1.472066  
C -1.200545 2.045933 0.611233  
C -0.395416 3.183451 0.731690  
C -1.777657 1.496672 1.761098  
C -0.196430 3.783720 1.974085  
H 0.076369 3.609620 -0.157468  
C -1.586792 2.100678 3.003145  
H -2.372049 0.581609 1.703734  
C -0.801417 3.248752 3.111701  
H 0.434390 4.669971 2.052911  
H -2.048642 1.667175 3.891694  
H -0.652318 3.719412 4.084378  
C 1.066934 0.232123 -1.079877  
H 1.029236 1.238328 -0.668794  
C 2.262018 -0.259428 -1.580968  
C 3.217217 0.798982 -2.063380  
F 2.655358 1.521497 -3.046211  
F 3.547803 1.666381 -1.103652  
F 4.341170 0.297481 -2.583115  
O -0.115762 -1.774254 -1.464923  
C -0.095980 -0.597133 -1.145387  
H -4.083874 1.591868 0.459706  
C -6.022665 -0.933380 0.019461  
H -6.413084 0.081172 0.090138  
H -7.903887 -1.870927 0.445913  
H 2.261878 -1.180065 -2.171071  
C 6.791924 0.027500 -0.812424  
H 6.713612 -0.007830 -1.907046  
H 7.207287 0.988637 -0.492811  
H 7.433980 -0.795733 -0.472473  
C 4.820286 -1.192984 -0.464073  
O 5.503995 -0.063684 -0.226740  
O 5.281446 -2.093996 -1.127002  
C 2.640327 -2.406435 0.059447  
C 3.463441 -1.182911 0.090180  
O 2.760926 -3.388856 -0.660748

|   |           |           |          |
|---|-----------|-----------|----------|
| N | 2.988433  | -0.351914 | 1.154055 |
| C | 1.770621  | -0.885258 | 1.605580 |
| C | 0.869222  | -0.393158 | 2.564582 |
| C | 1.565385  | -2.146918 | 1.028532 |
| C | -0.213374 | -1.197744 | 2.901539 |
| H | 0.993816  | 0.592887  | 3.005921 |
| C | 0.466196  | -2.935701 | 1.367350 |
| C | -0.430291 | -2.457963 | 2.313293 |
| H | -0.927267 | -0.825860 | 3.639507 |
| H | 0.326961  | -3.900432 | 0.875392 |
| H | -1.304563 | -3.045750 | 2.596014 |
| C | 3.591712  | 0.695634  | 1.875290 |
| O | 2.907250  | 1.617589  | 2.259413 |
| C | 5.025431  | 0.565513  | 2.332547 |
| H | 5.012922  | 0.810744  | 3.403029 |
| H | 5.439316  | -0.434332 | 2.179254 |
| H | 5.656747  | 1.300465  | 1.819836 |

-----  
 PCMopt/19\_TS\_RRk

Frequencies, energies and thermodynamic properties:

|                                                  |                  |
|--------------------------------------------------|------------------|
| Lowest Vibrational Mode (1/cm) =                 | -191.5785        |
| 2nd Lowest Vibrational Mode (1/cm) =             | 19.0640          |
| E(RM062X) (a.u.) =                               | -2588.50800212   |
| Thermal correction to Enthalpy (a.u.) =          | 0.662658         |
| Thermal correction to Gibbs Free Energy (a.u.) = | 0.547536         |
| Total Entropy (cal/Kmol) =                       | 242.295          |
| Esp(RM062X+D3) (a.u.) =                          | -2591.11236966   |
| Esp(D3) (a.u.) =                                 | -0.0105805378    |
| Esp(RM062X) (a.u.) =                             | -2591.1017891222 |

Optimised cartesian coordinates (Angstrom):

|   |           |           |           |
|---|-----------|-----------|-----------|
| C | -6.781181 | -2.102494 | 0.209461  |
| C | -6.264091 | -3.403106 | 0.116953  |
| C | -4.920961 | -3.619959 | -0.173089 |
| C | -4.106154 | -2.504382 | -0.366918 |
| C | -4.626590 | -1.212156 | -0.281762 |
| H | -6.921849 | -4.257453 | 0.277310  |
| H | -4.514443 | -4.628946 | -0.243808 |

C -2.420138 -0.738518 -0.725823  
C -1.488528 1.525538 -0.795762  
C -2.874287 1.905147 -1.350686  
C -3.958407 1.186702 -0.568647  
H -4.929499 1.289886 -1.070381  
S -2.397265 -2.478638 -0.753125  
N -3.645676 -0.242647 -0.515548  
N -1.337983 0.051113 -0.860824  
C -3.111866 3.431011 -1.444068  
C -3.727519 4.057977 -0.189194  
C -3.977840 3.748998 -2.664935  
H -2.124709 3.894042 -1.607278  
H -4.773023 3.736670 -0.061658  
H -3.175671 3.812125 0.728685  
H -3.735737 5.151873 -0.294225  
H -3.502608 3.404751 -3.594145  
H -4.963502 3.263984 -2.584837  
H -4.146330 4.831952 -2.745598  
H -2.893289 1.504652 -2.377338  
H -0.754951 1.928900 -1.503774  
C -1.201175 2.081145 0.581851  
C -0.463566 3.264814 0.693553  
C -1.726881 1.494483 1.737408  
C -0.287762 3.875193 1.933624  
H -0.028743 3.718194 -0.200900  
C -1.554252 2.106211 2.978714  
H -2.267176 0.546053 1.684495  
C -0.842882 3.302110 3.078001  
H 0.288227 4.798543 2.006399  
H -1.973468 1.641812 3.872787  
H -0.709963 3.779926 4.049579  
C 1.100947 0.300557 -1.093326  
H 1.053006 1.296815 -0.656435  
C 2.285370 -0.181271 -1.591238  
C 3.323114 0.843724 -1.956571  
F 2.860364 1.657716 -2.917446  
F 3.651118 1.631289 -0.925999

F 4.445007 0.306031 -2.437379  
O -0.052087 -1.721625 -1.488257  
C -0.062063 -0.549143 -1.165620  
H -4.054763 1.566560 0.458915  
C -5.972850 -0.988071 0.012026  
H -6.378102 0.019752 0.094316  
H -7.836036 -1.958057 0.443429  
H 2.312525 -1.112190 -2.162897  
C 6.908291 -0.213392 -0.618937  
H 6.827336 -0.184513 -1.713687  
H 7.396793 0.694737 -0.249939  
H 7.488036 -1.099580 -0.328832  
C 4.835822 -1.275241 -0.354628  
O 5.620024 -0.236225 -0.030435  
O 5.237955 -2.160064 -1.079510  
C 2.645239 -2.417786 0.072519  
C 3.476490 -1.212974 0.178202  
O 2.772587 -3.383046 -0.674237  
N 2.939786 -0.386300 1.235150  
C 1.726489 -0.968938 1.653958  
C 0.787758 -0.541473 2.612955  
C 1.556091 -2.211841 1.034516  
C -0.277145 -1.387215 2.903462  
H 0.868476 0.425757 3.098859  
C 0.479716 -3.048622 1.328117  
C -0.447089 -2.633520 2.273143  
H -1.010962 -1.060203 3.643692  
H 0.384951 -3.999634 0.800124  
H -1.306452 -3.257532 2.522608  
C 3.290827 0.882889 1.733703  
O 2.410558 1.641914 2.081951  
C 4.729541 1.260745 1.985424  
H 5.357597 0.397654 2.218339  
H 5.147293 1.762311 1.105577  
H 4.704876 1.968399 2.822195

-----  
PCMopt/19\_TS\_RRI



Frequencies, energies and thermodynamic properties:

|                                                  |                  |
|--------------------------------------------------|------------------|
| Lowest Vibrational Mode (1/cm) =                 | -270.4745        |
| 2nd Lowest Vibrational Mode (1/cm) =             | 22.5602          |
| E(RM062X) (a.u.) =                               | -2588.50831026   |
| Thermal correction to Enthalpy (a.u.) =          | 0.662882         |
| Thermal correction to Gibbs Free Energy (a.u.) = | 0.549955         |
| Total Entropy (cal/Kmol) =                       | 237.674          |
| Esp(RM062X+D3) (a.u.) =                          | -2591.11392194   |
| Esp(D3) (a.u.) =                                 | -0.0106224075    |
| Esp(RM062X) (a.u.) =                             | -2591.1032995325 |

Optimised cartesian coordinates (Angstrom):

|   |          |           |           |
|---|----------|-----------|-----------|
| C | 6.562315 | 2.465695  | 0.474863  |
| C | 5.950776 | 3.721366  | 0.350229  |
| C | 4.607583 | 3.830139  | 0.003850  |
| C | 3.891782 | 2.653660  | -0.216471 |
| C | 4.506316 | 1.406662  | -0.100349 |
| H | 6.533167 | 4.625168  | 0.529753  |
| H | 4.126278 | 4.803711  | -0.091320 |
| C | 2.364753 | 0.755715  | -0.647852 |
| C | 1.622831 | -1.571151 | -0.790765 |
| C | 3.076264 | -1.848632 | -1.213274 |
| C | 4.030121 | -1.040812 | -0.354438 |
| H | 5.049036 | -1.087132 | -0.759641 |
| S | 2.201394 | 2.495011  | -0.657462 |
| N | 3.614429 | 0.361967  | -0.369326 |
| N | 1.363741 | -0.114188 | -0.861430 |
| C | 3.433350 | -3.353110 | -1.256579 |
| C | 3.983100 | -3.913058 | 0.059086  |
| C | 4.422121 | -3.622060 | -2.392826 |
| H | 2.501186 | -3.891899 | -1.493234 |
| H | 4.987768 | -3.513226 | 0.267299  |
| H | 3.337821 | -3.693750 | 0.920994  |
| H | 4.079138 | -5.004981 | -0.019964 |
| H | 4.003637 | -3.329322 | -3.365950 |
| H | 5.357943 | -3.061504 | -2.240649 |
| H | 4.678026 | -4.689962 | -2.435935 |
| H | 3.156999 | -1.459736 | -2.241453 |

H 0.995569 -2.025032 -1.565955  
C 1.235268 -2.137914 0.558461  
C 0.603188 -3.382523 0.622999  
C 1.551725 -1.471197 1.746742  
C 0.321155 -3.968524 1.854843  
H 0.326658 -3.898591 -0.299853  
C 1.263584 -2.053461 2.980873  
H 2.024433 -0.485935 1.722815  
C 0.654659 -3.307163 3.036838  
H -0.172457 -4.940589 1.891635  
H 1.515210 -1.524112 3.901222  
H 0.430255 -3.763048 4.002099  
C -1.026151 -0.563642 -1.247517  
H -0.870201 -1.624289 -1.077050  
C -2.312344 -0.108134 -1.475915  
C -3.264825 -1.037785 -2.171775  
F -2.983745 -1.077889 -3.485795  
F -3.171145 -2.297801 -1.728721  
F -4.537140 -0.670200 -2.070435  
O -0.071004 1.604921 -1.262801  
C 0.028719 0.392330 -1.129278  
H 4.052750 -1.390864 0.688369  
C 5.851823 1.290413 0.252667  
H 6.332237 0.318799 0.360429  
H 7.614478 2.404293 0.753381  
H -2.450937 0.941497 -1.749803  
C -4.628902 -3.130948 0.889568  
H -4.272778 -3.457926 1.876092  
H -5.691735 -3.366927 0.776259  
H -4.042030 -3.642334 0.115266  
C -3.268928 -1.230967 0.850379  
O -4.516058 -1.724705 0.753378  
O -2.309036 -1.937504 1.061951  
C -4.350015 1.084445 0.217219  
C -3.224170 0.198847 0.547951  
O -5.522139 0.843896 -0.016676  
N -2.135049 1.007282 1.007189

|   |           |           |           |
|---|-----------|-----------|-----------|
| C | -2.397596 | 2.342557  | 0.605295  |
| C | -1.583601 | 3.479098  | 0.594160  |
| C | -3.719510 | 2.431042  | 0.148613  |
| C | -2.140922 | 4.678390  | 0.146405  |
| H | -0.537003 | 3.453225  | 0.882664  |
| C | -4.269385 | 3.628808  | -0.295944 |
| C | -3.468418 | 4.768126  | -0.292062 |
| H | -1.510473 | 5.568952  | 0.127050  |
| H | -5.305404 | 3.650827  | -0.639197 |
| H | -3.862468 | 5.723787  | -0.639187 |
| C | -1.433825 | 0.716951  | 2.190324  |
| O | -1.833592 | -0.105160 | 2.979228  |
| C | -0.159484 | 1.491024  | 2.425238  |
| H | 0.410304  | 1.631783  | 1.497455  |
| H | -0.391444 | 2.481582  | 2.842955  |
| H | 0.432651  | 0.938239  | 3.162394  |

-----

PCMopt/19\_TS\_RSa

Frequencies, energies and thermodynamic properties:

|                                                  |                  |
|--------------------------------------------------|------------------|
| Lowest Vibrational Mode (1/cm) =                 | -129.4721        |
| 2nd Lowest Vibrational Mode (1/cm) =             | 20.3570          |
| E(RM062X) (a.u.) =                               | -2588.52273927   |
| Thermal correction to Enthalpy (a.u.) =          | 0.663504         |
| Thermal correction to Gibbs Free Energy (a.u.) = | 0.548767         |
| Total Entropy (cal/Kmol) =                       | 241.484          |
| Esp(RM062X+D3) (a.u.) =                          | -2591.12996214   |
| Esp(D3) (a.u.) =                                 | -0.0100563941    |
| Esp(RM062X) (a.u.) =                             | -2591.1199057459 |

Optimised cartesian coordinates (Angstrom):

|   |          |           |           |
|---|----------|-----------|-----------|
| C | 7.179263 | -2.299631 | -1.008662 |
| C | 6.665103 | -3.600653 | -0.901030 |
| C | 5.365794 | -3.821427 | -0.457692 |
| C | 4.593918 | -2.708888 | -0.121351 |
| C | 5.111983 | -1.417375 | -0.219754 |
| H | 7.290288 | -4.451402 | -1.172235 |
| H | 4.959658 | -4.829685 | -0.376491 |
| C | 2.984230 | -0.949608 | 0.520203  |

|   |           |           |           |
|---|-----------|-----------|-----------|
| C | 2.106205  | 1.316476  | 0.888777  |
| C | 3.573978  | 1.656350  | 1.203707  |
| C | 4.491593  | 0.974852  | 0.207397  |
| H | 5.538864  | 1.072005  | 0.520182  |
| S | 2.938784  | -2.689048 | 0.450814  |
| N | 4.175209  | -0.453603 | 0.170698  |
| N | 1.942272  | -0.158993 | 0.857998  |
| C | 3.849301  | 3.173575  | 1.328002  |
| C | 4.237559  | 3.856470  | 0.012613  |
| C | 4.928304  | 3.421329  | 2.384264  |
| H | 2.917718  | 3.636356  | 1.692276  |
| H | 5.238213  | 3.535741  | -0.316537 |
| H | 3.526471  | 3.658480  | -0.801474 |
| H | 4.279888  | 4.944014  | 0.164306  |
| H | 4.622672  | 3.036574  | 3.367220  |
| H | 5.874043  | 2.931392  | 2.103962  |
| H | 5.128635  | 4.497233  | 2.483314  |
| H | 3.770602  | 1.202744  | 2.188756  |
| H | 1.532936  | 1.666244  | 1.754957  |
| C | 1.560548  | 1.965515  | -0.365237 |
| C | 0.875033  | 3.180867  | -0.260911 |
| C | 1.786066  | 1.415439  | -1.631312 |
| C | 0.458437  | 3.856541  | -1.405907 |
| H | 0.670335  | 3.607170  | 0.724546  |
| C | 1.358120  | 2.085632  | -2.777797 |
| H | 2.301045  | 0.457046  | -1.738706 |
| C | 0.703990  | 3.312435  | -2.667227 |
| H | -0.071280 | 4.805479  | -1.311837 |
| H | 1.538646  | 1.645828  | -3.759337 |
| H | 0.372892  | 3.837981  | -3.563896 |
| C | -0.462084 | 0.122461  | 1.351128  |
| H | -0.343530 | 1.202916  | 1.351679  |
| C | -1.697559 | -0.413226 | 1.546732  |
| C | -2.745038 | 0.452891  | 2.193334  |
| F | -2.439760 | 0.642999  | 3.485765  |
| F | -2.820318 | 1.666866  | 1.638070  |
| F | -3.966402 | -0.074727 | 2.170772  |

O 0.632166 -1.975949 1.242865  
C 0.671932 -0.766382 1.156738  
H 4.389226 1.385959 -0.807842  
C 6.413505 -1.189266 -0.671631  
H 6.816812 -0.182169 -0.769088  
H 8.198265 -2.151733 -1.366465  
H -1.839477 -1.496127 1.612801  
C -0.015231 -2.202663 -1.817495  
H 0.655319 -1.331667 -1.881887  
H 0.507347 -3.043998 -1.351857  
H -0.338086 -2.464972 -2.834325  
C -1.936658 -0.930332 -1.400207  
O -1.124732 -1.915474 -0.988172  
O -1.710996 -0.297860 -2.414833  
C -3.763149 -1.879367 0.075140  
C -3.057612 -0.737628 -0.496369  
O -3.307848 -2.918800 0.548749  
N -4.038711 0.253685 -0.853925  
C -5.321951 -0.251121 -0.576592  
C -6.589298 0.324782 -0.741274  
C -5.198200 -1.529368 -0.013858  
C -7.696291 -0.426457 -0.343880  
H -6.703745 1.313196 -1.173295  
C -6.309190 -2.266502 0.385408  
C -7.572925 -1.708434 0.212040  
H -8.691480 0.001985 -0.477354  
H -6.170607 -3.256863 0.823381  
H -8.466312 -2.260090 0.507186  
C -3.806973 1.567878 -1.219174  
O -4.726349 2.288712 -1.566842  
C -2.400902 2.112275 -1.161095  
H -1.694975 1.492297 -0.602981  
H -2.026046 2.220187 -2.186756  
H -2.466702 3.109128 -0.706374

-----

PCMopt/19\_TS\_RSb

Frequencies, energies and thermodynamic properties:

Lowest Vibrational Mode (1/cm) = -173.8028  
2nd Lowest Vibrational Mode (1/cm) = 15.5366  
E(RM062X) (a.u.) = -2588.52103184  
Thermal correction to Enthalpy (a.u.) = 0.663578  
Thermal correction to Gibbs Free Energy (a.u.) = 0.549055  
Total Entropy (cal/Kmol) = 241.033  
Esp(RM062X+D3) (a.u.) = -2591.12481697  
Esp(D3) (a.u.) = -0.0100097934  
Esp(RM062X) (a.u.) = -2591.1148071766

Optimised cartesian coordinates (Angstrom):

C 6.089008 3.335135 0.901470  
C 5.266510 4.462842 0.768511  
C 3.956094 4.342067 0.315932  
C 3.487937 3.067115 -0.000454  
C 4.313168 1.948657 0.124631  
H 5.655994 5.447994 1.025581  
H 3.312038 5.215753 0.213643  
C 2.374059 0.947017 -0.608643  
C 2.070098 -1.468710 -0.855968  
C 3.570893 -1.453982 -1.211843  
C 4.313174 -0.530008 -0.263172  
H 5.344382 -0.373233 -0.605375  
S 1.897967 2.624363 -0.596519  
N 3.652074 0.773844 -0.249517  
N 1.564207 -0.079101 -0.907363  
C 4.219999 -2.855425 -1.299922  
C 4.829769 -3.355789 0.013862  
C 5.281032 -2.867617 -2.402563  
H 3.424950 -3.557171 -1.598978  
H 5.733741 -2.781416 0.269684  
H 4.132922 -3.297898 0.861558  
H 5.134411 -4.405581 -0.099939  
H 4.845591 -2.620189 -3.380783  
H 6.077999 -2.138110 -2.188441  
H 5.749306 -3.859191 -2.475304  
H 3.623255 -1.001819 -2.215727  
H 1.563378 -2.002036 -1.670263

C 1.760502 -2.156753 0.457125  
C 1.487335 -3.529624 0.453273  
C 1.833971 -1.479465 1.677747  
C 1.357874 -4.228490 1.652084  
H 1.391075 -4.061030 -0.496687  
C 1.692887 -2.176560 2.878094  
H 1.978879 -0.397228 1.701534  
C 1.474163 -3.554202 2.868801  
H 1.158646 -5.300966 1.635390  
H 1.755487 -1.638593 3.824899  
H 1.372654 -4.098410 3.808832  
C -0.733454 -0.900861 -1.272745  
H -0.445849 -1.913014 -0.998768  
C -2.050188 -0.570957 -1.476372  
C -3.030551 -1.604796 -1.941153  
F -2.615463 -2.182922 -3.077108  
F -3.237408 -2.602082 -1.073049  
F -4.217927 -1.052043 -2.214536  
O -0.088290 1.351908 -1.546799  
C 0.191649 0.198687 -1.261337  
H 4.340836 -0.923331 0.763875  
C 5.626715 2.062143 0.582825  
H 6.268058 1.189170 0.698240  
H 7.110317 3.453099 1.263980  
H -2.280595 0.428887 -1.851592  
C -2.187030 -3.121535 2.210911  
H -3.014452 -3.768193 1.887457  
H -1.229844 -3.636785 2.090394  
H -2.342405 -2.850567 3.264014  
C -3.201735 -1.185991 1.398377  
O -2.116635 -1.962093 1.396114  
O -4.177893 -1.438912 2.071805  
C -1.865163 0.839566 0.829745  
C -3.027694 0.000120 0.542189  
O -0.739790 0.478819 1.166617  
N -4.148533 0.870323 0.305816  
C -3.682934 2.203711 0.281446

|   |           |           |           |
|---|-----------|-----------|-----------|
| C | -4.349690 | 3.408652  | 0.002043  |
| C | -2.315146 | 2.220593  | 0.586369  |
| C | -3.609667 | 4.587788  | 0.064673  |
| H | -5.405531 | 3.424590  | -0.241685 |
| C | -1.587041 | 3.407051  | 0.653910  |
| C | -2.243559 | 4.602590  | 0.389728  |
| H | -4.118008 | 5.531448  | -0.141953 |
| H | -0.524966 | 3.370054  | 0.901408  |
| H | -1.705769 | 5.550597  | 0.430847  |
| C | -5.474383 | 0.544046  | 0.039041  |
| O | -6.292653 | 1.426393  | -0.141765 |
| C | -5.929777 | -0.894476 | -0.005286 |
| H | -5.144738 | -1.633880 | -0.149620 |
| H | -6.432142 | -1.110396 | 0.946368  |
| H | -6.664989 | -0.958552 | -0.816345 |

-----

PCMopt/19\_TS\_RSc

Frequencies, energies and thermodynamic properties:

|                                                  |                  |
|--------------------------------------------------|------------------|
| Lowest Vibrational Mode (1/cm) =                 | -179.5378        |
| 2nd Lowest Vibrational Mode (1/cm) =             | 18.5385          |
| E(RM062X) (a.u.) =                               | -2588.51879620   |
| Thermal correction to Enthalpy (a.u.) =          | 0.663331         |
| Thermal correction to Gibbs Free Energy (a.u.) = | 0.548808         |
| Total Entropy (cal/Kmol) =                       | 241.034          |
| Esp(RM062X+D3) (a.u.) =                          | -2591.12404685   |
| Esp(D3) (a.u.) =                                 | -0.0100480803    |
| Esp(RM062X) (a.u.) =                             | -2591.1139987697 |

Optimised cartesian coordinates (Angstrom):

|   |          |           |           |
|---|----------|-----------|-----------|
| C | 5.923476 | 3.343666  | 0.457553  |
| C | 5.067109 | 4.439487  | 0.278275  |
| C | 3.740419 | 4.254471  | -0.098453 |
| C | 3.291639 | 2.948501  | -0.293101 |
| C | 4.149234 | 1.860643  | -0.120723 |
| H | 5.443120 | 5.450027  | 0.438653  |
| H | 3.068380 | 5.101876  | -0.236576 |
| C | 2.202252 | 0.767536  | -0.678012 |
| C | 1.947088 | -1.668463 | -0.754592 |



C 3.434395 -1.650375 -1.154270  
C 4.186438 -0.643444 -0.301933  
H 5.203247 -0.495488 -0.687897  
S 1.684173 2.429106 -0.764330  
N 3.499951 0.646652 -0.367437  
N 1.406067 -0.294727 -0.867481  
C 4.099803 -3.046937 -1.156255  
C 4.733210 -3.451246 0.178958  
C 5.142147 -3.126359 -2.273641  
H 3.306486 -3.775007 -1.391616  
H 5.629132 -2.846196 0.388378  
H 4.043054 -3.352704 1.028366  
H 5.056143 -4.500483 0.127466  
H 4.687906 -2.949126 -3.258555  
H 5.937176 -2.378837 -2.124447  
H 5.616880 -4.117450 -2.287335  
H 3.451326 -1.274784 -2.190372  
H 1.425796 -2.253534 -1.523023  
C 1.673108 -2.288055 0.599968  
C 1.332843 -3.643745 0.665728  
C 1.810767 -1.560651 1.784869  
C 1.173128 -4.274316 1.898350  
H 1.192363 -4.212871 -0.256887  
C 1.653009 -2.190791 3.018740  
H 2.012823 -0.487759 1.755955  
C 1.343998 -3.549809 3.078720  
H 0.911358 -5.332548 1.936492  
H 1.763722 -1.613607 3.937668  
H 1.220770 -4.040585 4.045142  
C -0.868670 -1.211614 -1.072305  
H -0.542572 -2.157716 -0.653218  
C -2.200405 -0.986887 -1.324413  
C -3.054746 -2.222741 -1.488557  
F -2.527673 -3.296004 -0.886048  
F -4.310002 -2.129201 -1.061398  
F -3.127708 -2.518886 -2.799063  
O -0.352384 1.049184 -1.432140

|   |           |           |           |
|---|-----------|-----------|-----------|
| C | 0.009158  | -0.084700 | -1.156384 |
| H | 4.253743  | -0.956065 | 0.750873  |
| C | 5.479601  | 2.039560  | 0.262309  |
| H | 6.148273  | 1.192990  | 0.413783  |
| H | 6.957511  | 3.512045  | 0.758933  |
| H | -2.520623 | -0.143105 | -1.934813 |
| C | -3.929094 | -2.833023 | 2.024188  |
| H | -4.696352 | -3.196647 | 1.326583  |
| H | -3.216150 | -3.632545 | 2.249707  |
| H | -4.419808 | -2.491587 | 2.945593  |
| C | -3.874925 | -0.695876 | 1.073455  |
| O | -3.180615 | -1.788564 | 1.428480  |
| O | -5.058171 | -0.574633 | 1.298012  |
| C | -1.752170 | 0.685310  | 1.022700  |
| C | -3.019590 | 0.301638  | 0.417686  |
| O | -0.855055 | -0.044702 | 1.439856  |
| N | -3.676315 | 1.509956  | 0.000152  |
| C | -2.891497 | 2.623038  | 0.358295  |
| C | -3.067999 | 4.001593  | 0.169966  |
| C | -1.726677 | 2.161490  | 0.991993  |
| C | -2.088111 | 4.864613  | 0.664502  |
| H | -3.932784 | 4.428098  | -0.327238 |
| C | -0.759106 | 3.028432  | 1.488294  |
| C | -0.944694 | 4.398422  | 1.326212  |
| H | -2.231438 | 5.938587  | 0.534021  |
| H | 0.123932  | 2.620774  | 1.984248  |
| H | -0.207663 | 5.107601  | 1.705164  |
| C | -4.747491 | 1.467566  | -0.885999 |
| O | -5.033855 | 0.437754  | -1.455681 |
| C | -5.545441 | 2.729982  | -1.099137 |
| H | -5.726320 | 3.265095  | -0.159588 |
| H | -5.021618 | 3.399338  | -1.795727 |
| H | -6.496653 | 2.436343  | -1.554651 |

-----  
 PCMOpt/19\_TS\_RSd

Frequencies, energies and thermodynamic properties:

Lowest Vibrational Mode (1/cm) = -128.7309

|                                                  |                  |
|--------------------------------------------------|------------------|
| 2nd Lowest Vibrational Mode (1/cm) =             | 14.7624          |
| E(RM062X) (a.u.) =                               | -2588.51313486   |
| Thermal correction to Enthalpy (a.u.) =          | 0.663270         |
| Thermal correction to Gibbs Free Energy (a.u.) = | 0.547171         |
| Total Entropy (cal/Kmol) =                       | 244.351          |
| Esp(RM062X+D3) (a.u.) =                          | -2591.12210937   |
| Esp(D3) (a.u.) =                                 | -0.0098973735    |
| Esp(RM062X) (a.u.) =                             | -2591.1122119965 |

Optimised cartesian coordinates (Angstrom):

|   |          |           |           |
|---|----------|-----------|-----------|
| C | 6.734150 | -2.794928 | -1.125791 |
| C | 6.093129 | -4.032092 | -0.967426 |
| C | 4.809001 | -4.109643 | -0.437425 |
| C | 4.180556 | -2.919844 | -0.070660 |
| C | 4.825774 | -1.691357 | -0.222003 |
| H | 6.605493 | -4.946973 | -1.265358 |
| H | 4.306393 | -5.069142 | -0.314101 |
| C | 2.812965 | -0.993648 | 0.645267  |
| C | 2.172754 | 1.352463  | 0.958565  |
| C | 3.678788 | 1.555882  | 1.215394  |
| C | 4.487926 | 0.758531  | 0.208067  |
| H | 5.550238 | 0.751763  | 0.484582  |
| S | 2.586445 | -2.720223 | 0.632156  |
| N | 4.025277 | -0.629407 | 0.212963  |
| N | 1.876156 | -0.098852 | 1.001298  |
| C | 4.108539 | 3.040505  | 1.283220  |
| C | 4.525791 | 3.642894  | -0.062369 |
| C | 5.236017 | 3.209425  | 2.303803  |
| H | 3.238334 | 3.605399  | 1.655142  |
| H | 5.480133 | 3.214375  | -0.406118 |
| H | 3.775819 | 3.493057  | -0.851585 |
| H | 4.679971 | 4.724780  | 0.053665  |
| H | 4.920038 | 2.888122  | 3.306103  |
| H | 6.118764 | 2.616388  | 2.017237  |
| H | 5.547466 | 4.261686  | 2.362306  |
| H | 3.864767 | 1.112060  | 2.206993  |
| H | 1.653945 | 1.788385  | 1.821652  |
| C | 1.667587 | 2.015193  | -0.304883 |

C 1.117211 3.299209 -0.220751  
C 1.816436 1.417243 -1.559530  
C 0.763356 3.994517 -1.375268  
H 0.969422 3.762657 0.757948  
C 1.468402 2.116430 -2.716222  
H 2.200144 0.397269 -1.646696  
C 0.951108 3.408543 -2.627576  
H 0.338828 4.996057 -1.295934  
H 1.601237 1.647044 -3.692092  
H 0.681039 3.952373 -3.533637  
C -0.493510 0.385254 1.462855  
H -0.341222 1.426603 1.189275  
C -1.747365 -0.076201 1.706730  
C -2.817240 0.891707 2.117310  
F -2.654103 1.222867 3.409889  
F -2.787039 2.032499 1.426675  
F -4.049493 0.392355 2.015823  
O 0.510845 -1.736604 1.794443  
C 0.590054 -0.577091 1.452628  
H 4.395830 1.159174 -0.812331  
C 6.112174 -1.606691 -0.756660  
H 6.611978 -0.648009 -0.890114  
H 7.738424 -2.759035 -1.548265  
H -1.897098 -1.113527 2.017522  
C -0.773066 -0.856498 -3.385521  
H -0.404245 -1.891625 -3.387610  
H -1.127504 -0.582524 -4.384502  
H 0.046631 -0.192282 -3.082611  
C -1.642059 -0.979267 -1.212704  
O -1.877982 -0.714117 -2.513091  
O -0.566471 -1.397490 -0.837667  
C -3.451946 -1.909692 0.279178  
C -2.826942 -0.783578 -0.376868  
O -2.933303 -2.885573 0.827515  
N -3.856965 0.092165 -0.859839  
C -5.111860 -0.445241 -0.526457  
C -6.421607 0.006206 -0.742676

C -4.906174 -1.655334 0.160481  
 C -7.475092 -0.782818 -0.277125  
 H -6.653080 0.927489 -1.266916  
 C -5.962886 -2.431012 0.625525  
 C -7.264230 -1.990584 0.400819  
 H -8.495857 -0.440743 -0.456309  
 H -5.750856 -3.362547 1.153857  
 H -8.116607 -2.575830 0.747402  
 C -3.519442 1.363083 -1.303000  
 O -2.356894 1.710846 -1.332405  
 C -4.628917 2.283206 -1.743284  
 H -5.236781 1.828436 -2.535827  
 H -5.283285 2.531296 -0.896308  
 H -4.162907 3.199420 -2.118516

-----

PCMopt/19\_TS\_RSe

Frequencies, energies and thermodynamic properties:

Lowest Vibrational Mode (1/cm) = -150.8183  
 2nd Lowest Vibrational Mode (1/cm) = 18.7599  
 E(RM062X) (a.u.) = -2588.51323117  
 Thermal correction to Enthalpy (a.u.) = 0.663380  
 Thermal correction to Gibbs Free Energy (a.u.) = 0.548565  
 Total Entropy (cal/Kmol) = 241.649  
 Esp(RM062X+D3) (a.u.) = -2591.12113274  
 Esp(D3) (a.u.) = -0.0098587244  
 Esp(RM062X) (a.u.) = -2591.1112740156

Optimised cartesian coordinates (Angstrom):

C 7.320234 -2.154815 -0.778687  
 C 6.825906 -3.467910 -0.776813  
 C 5.499780 -3.732041 -0.451973  
 C 4.679977 -2.650708 -0.127635  
 C 5.177538 -1.347555 -0.121823  
 H 7.488589 -4.293581 -1.036297  
 H 5.109436 -4.749931 -0.451950  
 C 2.989597 -0.952441 0.470508  
 C 2.034056 1.278564 0.780766  
 C 3.448057 1.663396 1.246878

|   |           |           |           |
|---|-----------|-----------|-----------|
| C | 4.491766  | 1.010634  | 0.362309  |
| H | 5.489526  | 1.100808  | 0.810900  |
| S | 2.984519  | -2.686716 | 0.310847  |
| N | 4.194903  | -0.418544 | 0.239578  |
| N | 1.909352  | -0.199638 | 0.766932  |
| C | 3.647847  | 3.190165  | 1.395882  |
| C | 4.123396  | 3.898389  | 0.123806  |
| C | 4.610470  | 3.481096  | 2.549008  |
| H | 2.664870  | 3.608463  | 1.669852  |
| H | 5.160212  | 3.618505  | -0.119745 |
| H | 3.492028  | 3.681699  | -0.749025 |
| H | 4.111533  | 4.985211  | 0.285857  |
| H | 4.233698  | 3.074603  | 3.497997  |
| H | 5.600677  | 3.039197  | 2.356308  |
| H | 4.748727  | 4.564542  | 2.670075  |
| H | 3.548631  | 1.218305  | 2.250250  |
| H | 1.368441  | 1.633781  | 1.572140  |
| C | 1.601098  | 1.881010  | -0.538708 |
| C | 0.746252  | 2.985960  | -0.536729 |
| C | 2.091303  | 1.400046  | -1.760077 |
| C | 0.408111  | 3.621116  | -1.731230 |
| H | 0.336650  | 3.355206  | 0.406525  |
| C | 1.754404  | 2.034369  | -2.954320 |
| H | 2.736579  | 0.518723  | -1.796893 |
| C | 0.919122  | 3.152620  | -2.940715 |
| H | -0.263503 | 4.480336  | -1.714873 |
| H | 2.144322  | 1.651660  | -3.898276 |
| H | 0.655872  | 3.648977  | -3.875669 |
| C | -0.499675 | -0.000442 | 1.295386  |
| H | -0.416765 | 1.077799  | 1.385091  |
| C | -1.719450 | -0.574798 | 1.478104  |
| C | -2.724003 | 0.145819  | 2.339175  |
| F | -2.605674 | -0.327425 | 3.593570  |
| F | -2.515705 | 1.459135  | 2.407379  |
| F | -3.998602 | -0.038305 | 1.996783  |
| O | 0.631641  | -2.061672 | 1.007834  |
| C | 0.645560  | -0.847259 | 1.011719  |

H 4.522843 1.449314 -0.645916  
C 6.506593 -1.075509 -0.452494  
H 6.895116 -0.057992 -0.463856  
H 8.362102 -1.972550 -1.042459  
H -1.841172 -1.661096 1.421597  
C 0.049751 -1.772505 -2.036171  
H 0.680023 -0.882583 -1.887494  
H 0.589135 -2.672798 -1.724031  
H -0.211476 -1.832044 -3.102271  
C -1.913629 -0.643616 -1.439874  
O -1.109589 -1.701707 -1.230092  
O -1.642906 0.209297 -2.260735  
C -3.768343 -1.895878 -0.206090  
C -3.085074 -0.677664 -0.585837  
O -3.309354 -2.998459 0.097196  
N -4.061661 0.356077 -0.782052  
C -5.345184 -0.191826 -0.597764  
C -6.628542 0.364454 -0.694606  
C -5.208056 -1.545213 -0.242927  
C -7.725682 -0.462425 -0.445541  
H -6.806843 1.398317 -0.971989  
C -6.307358 -2.359486 0.008989  
C -7.582873 -1.811689 -0.096746  
H -8.726166 -0.035503 -0.534241  
H -6.148114 -3.404584 0.281866  
H -8.467151 -2.422467 0.088168  
C -3.691888 1.692397 -0.653636  
O -2.572915 1.993294 -0.299372  
C -4.721477 2.744931 -0.985035  
H -5.258075 2.514001 -1.913025  
H -5.450628 2.836205 -0.167592  
H -4.192263 3.697879 -1.086641

-----  
PCMopt/19\_TS\_RSf

Frequencies, energies and thermodynamic properties:

Lowest Vibrational Mode (1/cm) = -189.5664

2nd Lowest Vibrational Mode (1/cm) = 16.8288

E(RM062X) (a.u.) = -2588.51324270  
Thermal correction to Enthalpy (a.u.) = 0.663251  
Thermal correction to Gibbs Free Energy (a.u.) = 0.548269  
Total Entropy (cal/Kmol) = 242.000  
Esp(RM062X+D3) (a.u.) = -2591.12088703  
Esp(D3) (a.u.) = -0.0104287436  
Esp(RM062X) (a.u.) = -2591.1104582864

Optimised cartesian coordinates (Angstrom):

C 6.331938 3.026551 0.166766  
C 5.590574 4.208155 0.312558  
C 4.206593 4.207017 0.170474  
C 3.582325 2.993599 -0.117023  
C 4.324369 1.821831 -0.271665  
H 6.103982 5.141660 0.543179  
H 3.625951 5.122610 0.283763  
C 2.200661 1.003162 -0.599859  
C 1.677468 -1.369141 -0.870793  
C 3.031826 -1.427963 -1.601333  
C 4.063366 -0.601339 -0.855624  
H 4.958972 -0.451404 -1.472912  
S 1.873465 2.698551 -0.369512  
N 3.507955 0.723852 -0.568140  
N 1.261939 0.050486 -0.750544  
C 3.512418 -2.868451 -1.898195  
C 4.353964 -3.504944 -0.787526  
C 4.283013 -2.898553 -3.219894  
H 2.604005 -3.479830 -2.029147  
H 5.337891 -3.016645 -0.709282  
H 3.868404 -3.464519 0.197482  
H 4.536063 -4.561374 -1.029255  
H 3.660946 -2.546475 -4.054628  
H 5.179015 -2.260192 -3.167779  
H 4.616612 -3.920655 -3.447155  
H 2.855762 -0.933861 -2.570709  
H 0.948970 -1.832745 -1.545421  
C 1.653518 -2.098708 0.455171  
C 1.094195 -3.379994 0.510910



C 2.262059 -1.571838 1.599868  
C 1.179860 -4.140555 1.676580  
H 0.597730 -3.792893 -0.371147  
C 2.359757 -2.336391 2.761125  
H 2.663047 -0.555462 1.601717  
C 1.827997 -3.625452 2.799090  
H 0.742852 -5.139494 1.704540  
H 2.844687 -1.917298 3.644151  
H 1.904576 -4.221958 3.709238  
C -1.085387 -0.644842 -0.837977  
H -0.801227 -1.608859 -0.420428  
C -2.358386 -0.451420 -1.297291  
C -3.164768 -1.667140 -1.655787  
F -2.822196 -2.085941 -2.887564  
F -2.937504 -2.689331 -0.829968  
F -4.478031 -1.449598 -1.690878  
O -0.366071 1.609815 -1.075632  
C -0.123800 0.431387 -0.895823  
H 4.368374 -1.067369 0.092529  
C 5.712565 1.816551 -0.127996  
H 6.292821 0.900610 -0.232750  
H 7.414939 3.052345 0.287984  
H -2.617373 0.455803 -1.843359  
C -5.492246 2.176119 -2.371322  
H -6.038949 2.916091 -1.770141  
H -4.991455 2.669480 -3.210210  
H -6.201780 1.424898 -2.742957  
C -4.887240 0.941735 -0.476523  
O -4.475158 1.570024 -1.594346  
O -6.057220 0.721791 -0.266517  
C -3.815171 -0.671687 1.225110  
C -3.775005 0.492084 0.373662  
O -4.620461 -1.604002 1.266909  
N -2.726488 1.369705 0.804228  
C -1.922303 0.645823 1.707952  
C -0.689100 0.950383 2.307044  
C -2.557188 -0.573852 1.997993

|   |           |           |          |
|---|-----------|-----------|----------|
| C | -0.146395 | 0.020464  | 3.190338 |
| H | -0.137061 | 1.860494  | 2.088001 |
| C | -1.992681 | -1.503203 | 2.869913 |
| C | -0.781142 | -1.198112 | 3.478681 |
| H | 0.815463  | 0.244527  | 3.655133 |
| H | -2.512687 | -2.444633 | 3.058119 |
| H | -0.310446 | -1.904131 | 4.163682 |
| C | -2.875533 | 2.752827  | 0.769696 |
| O | -3.920151 | 3.255842  | 0.407635 |
| C | -1.698966 | 3.597141  | 1.182513 |
| H | -1.515542 | 3.511656  | 2.262311 |
| H | -0.797231 | 3.286056  | 0.641081 |
| H | -1.943463 | 4.637066  | 0.944165 |

-----  
 PCMopt/19\_TS\_RSg

Frequencies, energies and thermodynamic properties:

|                                                  |                  |
|--------------------------------------------------|------------------|
| Lowest Vibrational Mode (1/cm) =                 | -258.6653        |
| 2nd Lowest Vibrational Mode (1/cm) =             | 16.3957          |
| E(RM062X) (a.u.) =                               | -2588.51597833   |
| Thermal correction to Enthalpy (a.u.) =          | 0.663105         |
| Thermal correction to Gibbs Free Energy (a.u.) = | 0.548236         |
| Total Entropy (cal/Kmol) =                       | 241.763          |
| Esp(RM062X+D3) (a.u.) =                          | -2591.12075261   |
| Esp(D3) (a.u.) =                                 | -0.0103688943    |
| Esp(RM062X) (a.u.) =                             | -2591.1103837157 |

Optimised cartesian coordinates (Angstrom):

|   |          |           |           |
|---|----------|-----------|-----------|
| C | 6.308107 | 2.959844  | 0.272148  |
| C | 5.566293 | 4.141472  | 0.410554  |
| C | 4.186240 | 4.145381  | 0.230202  |
| C | 3.564914 | 2.938333  | -0.088217 |
| C | 4.309186 | 1.766140  | -0.235209 |
| H | 6.075253 | 5.071108  | 0.665655  |
| H | 3.605784 | 5.061864  | 0.338152  |
| C | 2.192155 | 0.962882  | -0.636384 |
| C | 1.659234 | -1.402196 | -0.916421 |
| C | 3.031274 | -1.474808 | -1.614713 |
| C | 4.051078 | -0.651821 | -0.847134 |

H 4.960803 -0.507887 -1.445300  
S 1.859851 2.654677 -0.385277  
N 3.498288 0.675520 -0.568684  
N 1.256195 0.019770 -0.817672  
C 3.510116 -2.918449 -1.897638  
C 4.323354 -3.557703 -0.767686  
C 4.309175 -2.956532 -3.202199  
H 2.601185 -3.524952 -2.046828  
H 5.308165 -3.074872 -0.668866  
H 3.816346 -3.511701 0.206250  
H 4.504520 -4.615813 -1.002951  
H 3.707176 -2.603747 -4.051284  
H 5.206764 -2.322059 -3.132457  
H 4.642890 -3.980799 -3.419618  
H 2.880779 -0.982007 -2.589002  
H 0.939610 -1.863473 -1.602858  
C 1.600886 -2.131471 0.409113  
C 1.033947 -3.410461 0.449198  
C 2.188517 -1.612470 1.567990  
C 1.091949 -4.176470 1.612624  
H 0.553143 -3.816067 -0.444664  
C 2.258609 -2.382887 2.727861  
H 2.593340 -0.597582 1.581797  
C 1.719408 -3.668940 2.750556  
H 0.649345 -5.173266 1.627579  
H 2.728782 -1.970609 3.622036  
H 1.775020 -4.269423 3.659603  
C -1.103924 -0.614660 -0.903888  
H -0.844951 -1.563621 -0.438353  
C -2.399507 -0.362455 -1.304386  
C -3.273157 -1.544108 -1.611091  
F -2.966782 -2.039463 -2.822298  
F -3.108226 -2.540429 -0.739710  
F -4.573963 -1.245014 -1.651322  
O -0.317467 1.571161 -1.395684  
C -0.121924 0.415993 -1.061752  
H 4.333908 -1.121269 0.106309

|   |           |           |           |
|---|-----------|-----------|-----------|
| C | 5.692505  | 1.755071  | -0.053007 |
| H | 6.272259  | 0.838119  | -0.152666 |
| H | 7.387539  | 2.980686  | 0.422927  |
| H | -2.591829 | 0.511543  | -1.930164 |
| C | -6.820572 | 1.187924  | -1.240116 |
| H | -6.597968 | 0.657842  | -2.176258 |
| H | -7.753896 | 0.817127  | -0.806263 |
| H | -6.898849 | 2.262601  | -1.450220 |
| C | -4.564170 | 1.253625  | -0.645327 |
| O | -5.806107 | 0.933987  | -0.279206 |
| O | -4.334238 | 1.854370  | -1.676137 |
| C | -3.784716 | -0.415171 | 1.185188  |
| C | -3.553543 | 0.716601  | 0.280822  |
| O | -4.714860 | -1.211468 | 1.227749  |
| N | -2.417879 | 1.453371  | 0.759766  |
| C | -1.753542 | 0.639760  | 1.698339  |
| C | -0.533411 | 0.827605  | 2.369361  |
| C | -2.551903 | -0.475092 | 1.990668  |
| C | -0.162360 | -0.132728 | 3.306265  |
| H | 0.098981  | 1.683983  | 2.157335  |
| C | -2.158110 | -1.437568 | 2.919563  |
| C | -0.949645 | -1.263226 | 3.582583  |
| H | 0.785927  | -0.006355 | 3.831884  |
| H | -2.804440 | -2.296641 | 3.109937  |
| H | -0.604193 | -1.998798 | 4.310241  |
| C | -2.090451 | 2.798379  | 0.615282  |
| O | -1.008576 | 3.206158  | 0.987207  |
| C | -3.120144 | 3.749531  | 0.062867  |
| H | -3.161386 | 3.678431  | -1.029678 |
| H | -4.124595 | 3.541362  | 0.452948  |
| H | -2.803735 | 4.755349  | 0.357783  |

-----  
 PCMOpt/19\_TS\_RSh

Frequencies, energies and thermodynamic properties:

|                                      |                |
|--------------------------------------|----------------|
| Lowest Vibrational Mode (1/cm) =     | -153.4421      |
| 2nd Lowest Vibrational Mode (1/cm) = | 16.1708        |
| E(RM062X) (a.u.) =                   | -2588.51435193 |

Thermal correction to Enthalpy (a.u.) = 0.663232  
Thermal correction to Gibbs Free Energy (a.u.) = 0.548013  
Total Entropy (cal/Kmol) = 242.499  
Esp(RM062X+D3) (a.u.) = -2591.11987098  
Esp(D3) (a.u.) = -0.0097914840  
Esp(RM062X) (a.u.) = -2591.1100794960

Optimised cartesian coordinates (Angstrom):

C 6.119146 3.219501 1.160584  
C 5.322886 4.361877 0.997169  
C 4.038507 4.267955 0.469549  
C 3.569528 3.005053 0.109741  
C 4.369094 1.871746 0.265545  
H 5.712028 5.337218 1.289764  
H 3.414414 5.152882 0.343169  
C 2.459001 0.911443 -0.589047  
C 2.130650 -1.494961 -0.881341  
C 3.648281 -1.502448 -1.153356  
C 4.352293 -0.601784 -0.154192  
H 5.403123 -0.458610 -0.437786  
S 2.009574 2.595606 -0.580975  
N 3.712483 0.712777 -0.161463  
N 1.651662 -0.095972 -0.946742  
C 4.276530 -2.914410 -1.222840  
C 4.798741 -3.444145 0.116692  
C 5.400495 -2.931494 -2.261228  
H 3.487832 -3.597146 -1.577940  
H 5.694978 -2.889255 0.435307  
H 4.053141 -3.386900 0.921573  
H 5.092749 -4.497158 0.004590  
H 5.028302 -2.662342 -3.259620  
H 6.196366 -2.220074 -1.989556  
H 5.854487 -3.930563 -2.321001  
H 3.764796 -1.040498 -2.147371  
H 1.660704 -2.011263 -1.728187  
C 1.733377 -2.188716 0.404539  
C 1.411721 -3.550189 0.367578  
C 1.756225 -1.525311 1.634564

C 1.163680 -4.250906 1.546367  
H 1.359171 -4.069394 -0.592564  
C 1.512016 -2.227258 2.815077  
H 1.938640 -0.449706 1.679597  
C 1.225964 -3.592109 2.775032  
H 0.918252 -5.312895 1.504336  
H 1.536967 -1.701289 3.770395  
H 1.035173 -4.138393 3.699812  
C -0.646550 -0.875925 -1.403344  
H -0.380593 -1.897680 -1.143217  
C -1.950428 -0.523595 -1.613730  
C -2.963466 -1.519414 -2.097061  
F -2.578210 -2.021995 -3.286663  
F -3.147048 -2.564443 -1.297636  
F -4.146919 -0.940079 -2.312235  
O 0.058773 1.362987 -1.672814  
C 0.301179 0.209714 -1.359740  
H 4.317342 -1.006589 0.868195  
C 5.656087 1.958355 0.798465  
H 6.276043 1.073482 0.937429  
H 7.119919 3.316179 1.581906  
H -2.167619 0.495969 -1.940504  
C -4.069078 -2.350287 3.053326  
H -3.148132 -2.586841 3.602945  
H -4.885436 -2.147436 3.753392  
H -4.326502 -3.205372 2.412613  
C -2.947272 -1.228382 1.334134  
O -3.906635 -1.177776 2.273321  
O -2.161487 -2.141536 1.268924  
C -1.753854 0.865765 0.721629  
C -2.887660 0.000531 0.518032  
O -0.599287 0.539917 1.022451  
N -4.047671 0.804984 0.302695  
C -3.645409 2.150020 0.197681  
C -4.350564 3.323968 -0.115610  
C -2.260974 2.223064 0.443052  
C -3.649120 4.527902 -0.132345

|   |           |           |           |
|---|-----------|-----------|-----------|
| H | -5.411994 | 3.337769  | -0.338024 |
| C | -1.572276 | 3.434372  | 0.427362  |
| C | -2.274341 | 4.598245  | 0.139909  |
| H | -4.196635 | 5.442740  | -0.365082 |
| H | -0.500000 | 3.439088  | 0.629397  |
| H | -1.765305 | 5.562420  | 0.117233  |
| C | -5.296514 | 0.226003  | 0.093269  |
| O | -5.414365 | -0.979133 | 0.059064  |
| C | -6.486722 | 1.136825  | -0.067262 |
| H | -6.536459 | 1.886344  | 0.732167  |
| H | -6.447188 | 1.654112  | -1.035756 |
| H | -7.380497 | 0.505938  | -0.041005 |

-----  
 PCMOpt/19\_TS\_RSi

Frequencies, energies and thermodynamic properties:

|                                                  |                  |
|--------------------------------------------------|------------------|
| Lowest Vibrational Mode (1/cm) =                 | -212.8751        |
| 2nd Lowest Vibrational Mode (1/cm) =             | 17.8263          |
| E(RM062X) (a.u.) =                               | -2588.51323710   |
| Thermal correction to Enthalpy (a.u.) =          | 0.663096         |
| Thermal correction to Gibbs Free Energy (a.u.) = | 0.548970         |
| Total Entropy (cal/Kmol) =                       | 240.198          |
| Esp(RM062X+D3) (a.u.) =                          | -2591.12038904   |
| Esp(D3) (a.u.) =                                 | -0.0103716212    |
| Esp(RM062X) (a.u.) =                             | -2591.1100174188 |

Optimised cartesian coordinates (Angstrom):

|   |          |           |           |
|---|----------|-----------|-----------|
| C | 6.476514 | 2.854871  | 0.093134  |
| C | 5.777949 | 4.068184  | 0.173813  |
| C | 4.397088 | 4.111105  | 0.008421  |
| C | 3.732382 | 2.909954  | -0.236004 |
| C | 4.432138 | 1.705832  | -0.325793 |
| H | 6.322321 | 4.991635  | 0.371598  |
| H | 3.849269 | 5.051458  | 0.071648  |
| C | 2.283214 | 0.951416  | -0.651173 |
| C | 1.674298 | -1.407392 | -0.830124 |
| C | 3.037956 | -1.549089 | -1.531703 |
| C | 4.087493 | -0.730496 | -0.802434 |
| H | 4.999931 | -0.644465 | -1.407245 |

|   |           |           |           |
|---|-----------|-----------|-----------|
| S | 2.017127  | 2.667512  | -0.503151 |
| N | 3.579408  | 0.626361  | -0.586047 |
| N | 1.312348  | 0.029719  | -0.773739 |
| C | 3.467820  | -3.018132 | -1.757942 |
| C | 4.271375  | -3.634071 | -0.608373 |
| C | 4.253047  | -3.135939 | -3.065960 |
| H | 2.539003  | -3.601107 | -1.873951 |
| H | 5.271244  | -3.178067 | -0.537760 |
| H | 3.774945  | -3.531758 | 0.366634  |
| H | 4.417966  | -4.706156 | -0.800143 |
| H | 3.654527  | -2.800485 | -3.924436 |
| H | 5.170536  | -2.527712 | -3.029977 |
| H | 4.552657  | -4.178462 | -3.242144 |
| H | 2.897774  | -1.090796 | -2.524199 |
| H | 0.939537  | -1.869366 | -1.499091 |
| C | 1.598910  | -2.081613 | 0.522904  |
| C | 0.995465  | -3.340596 | 0.617165  |
| C | 2.201727  | -1.529505 | 1.658677  |
| C | 1.032470  | -4.056429 | 1.813136  |
| H | 0.502692  | -3.771682 | -0.258324 |
| C | 2.250478  | -2.250164 | 2.850916  |
| H | 2.636029  | -0.527152 | 1.629077  |
| C | 1.675176  | -3.518412 | 2.928156  |
| H | 0.561509  | -5.038506 | 1.871168  |
| H | 2.731609  | -1.812512 | 3.726990  |
| H | 1.713572  | -4.080275 | 3.862450  |
| C | -1.057737 | -0.577338 | -0.853696 |
| H | -0.808129 | -1.539766 | -0.412224 |
| C | -2.331692 | -0.351576 | -1.314573 |
| C | -3.154461 | -1.563042 | -1.656141 |
| F | -2.787712 | -2.034838 | -2.860482 |
| F | -2.975536 | -2.558664 | -0.786440 |
| F | -4.463235 | -1.321066 | -1.736033 |
| O | -0.252288 | 1.636063  | -1.180908 |
| C | -0.061218 | 0.455793  | -0.947976 |
| H | 4.355470  | -1.165074 | 0.171521  |
| C | 5.816687  | 1.656266  | -0.158084 |



|   |           |           |           |
|---|-----------|-----------|-----------|
| H | 6.363956  | 0.715881  | -0.211843 |
| H | 7.557745  | 2.846146  | 0.231494  |
| H | -2.549655 | 0.538685  | -1.907791 |
| C | -6.876483 | 0.954222  | -1.460207 |
| H | -6.575497 | 0.440060  | -2.383586 |
| H | -7.812883 | 0.533579  | -1.080988 |
| H | -7.001714 | 2.023444  | -1.676916 |
| C | -4.663847 | 1.149156  | -0.743020 |
| O | -5.906731 | 0.753433  | -0.445008 |
| O | -4.407134 | 1.747930  | -1.766116 |
| C | -3.828399 | -0.449511 | 1.147631  |
| C | -3.683444 | 0.680148  | 0.246440  |
| O | -4.682006 | -1.332149 | 1.192876  |
| N | -2.613093 | 1.516046  | 0.702222  |
| C | -1.883278 | 0.777951  | 1.656381  |
| C | -0.657335 | 1.035215  | 2.290650  |
| C | -2.595169 | -0.393244 | 1.963608  |
| C | -0.199239 | 0.107285  | 3.222616  |
| H | -0.047991 | 1.905528  | 2.062306  |
| C | -2.115606 | -1.322677 | 2.884730  |
| C | -0.910014 | -1.064691 | 3.526270  |
| H | 0.756993  | 0.293708  | 3.714644  |
| H | -2.694561 | -2.226657 | 3.084070  |
| H | -0.502652 | -1.772037 | 4.249465  |
| C | -2.699892 | 2.907377  | 0.654043  |
| O | -3.718528 | 3.453560  | 0.288537  |
| C | -1.484647 | 3.698245  | 1.061218  |
| H | -1.328076 | 3.639579  | 2.147128  |
| H | -0.591546 | 3.321229  | 0.548957  |
| H | -1.667750 | 4.741858  | 0.786144  |

-----  
 PCMopt/19\_TS\_RSj

Frequencies, energies and thermodynamic properties:

|                                         |                |
|-----------------------------------------|----------------|
| Lowest Vibrational Mode (1/cm) =        | -232.2385      |
| 2nd Lowest Vibrational Mode (1/cm) =    | 18.7349        |
| E(RM062X) (a.u.) =                      | -2588.51373980 |
| Thermal correction to Enthalpy (a.u.) = | 0.663170       |

Thermal correction to Gibbs Free Energy (a.u.) = 0.548378  
Total Entropy (cal/Kmol) = 241.600  
Esp(RM062X+D3) (a.u.) = -2591.11940275  
Esp(D3) (a.u.) = -0.0103976481  
Esp(RM062X) (a.u.) = -2591.1090051019

Optimised cartesian coordinates (Angstrom):

C 6.201210 3.076524 0.355622  
C 5.431598 4.228890 0.569820  
C 4.048423 4.204530 0.418267  
C 3.452335 2.998517 0.050828  
C 4.223995 1.856424 -0.171939  
H 5.921547 5.157829 0.861938  
H 3.446778 5.098192 0.585257  
C 2.121377 1.016826 -0.570462  
C 1.648053 -1.346246 -0.958732  
C 3.003214 -1.343201 -1.692126  
C 4.018843 -0.531603 -0.907485  
H 4.907838 -0.328868 -1.519611  
S 1.749736 2.682882 -0.225629  
N 3.435371 0.762464 -0.545434  
N 1.206464 0.057142 -0.781557  
C 3.513312 -2.756001 -2.062432  
C 4.369085 -3.432405 -0.986880  
C 4.282635 -2.702604 -3.384179  
H 2.617132 -3.378011 -2.224318  
H 5.343173 -2.929134 -0.883834  
H 3.884226 -3.452555 -0.000964  
H 4.571940 -4.471080 -1.283166  
H 3.652402 -2.321243 -4.199740  
H 5.164970 -2.048847 -3.299505  
H 4.637462 -3.704425 -3.663732  
H 2.814262 -0.805087 -2.635236  
H 0.926294 -1.795516 -1.650685  
C 1.642963 -2.140002 0.330237  
C 1.102221 -3.430684 0.322155  
C 2.252988 -1.666786 1.497245  
C 1.207628 -4.251746 1.444079

H 0.604200 -3.802147 -0.577081  
C 2.371193 -2.491957 2.614651  
H 2.638304 -0.645722 1.550882  
C 1.857508 -3.788362 2.588046  
H 0.784487 -5.256819 1.421545  
H 2.859015 -2.114884 3.514851  
H 1.950436 -4.431636 3.464175  
C -1.137632 -0.642697 -0.889333  
H -0.854432 -1.605187 -0.466741  
C -2.429889 -0.406690 -1.290949  
C -3.294629 -1.580529 -1.640155  
F -2.986284 -2.026453 -2.871100  
F -3.122474 -2.609987 -0.810037  
F -4.594501 -1.283172 -1.668998  
O -0.417281 1.590996 -1.250059  
C -0.181274 0.426081 -0.989250  
H 4.340608 -1.040802 0.012638  
C 5.610847 1.873661 -0.018807  
H 6.212116 0.979167 -0.177366  
H 7.282712 3.119248 0.485441  
H -2.647298 0.497825 -1.859269  
C -5.350025 2.405383 -2.273783  
H -5.937561 3.112447 -1.671637  
H -4.844657 2.929901 -3.090245  
H -6.023280 1.635719 -2.672986  
C -4.738665 1.143076 -0.391329  
O -4.327874 1.810760 -1.486877  
O -5.911894 0.979159 -0.155526  
C -3.832160 -0.611742 1.219925  
C -3.635895 0.581425 0.406388  
O -4.761919 -1.413680 1.220304  
N -2.498344 1.298946 0.907749  
C -1.806294 0.430332 1.775418  
C -0.580257 0.591396 2.442145  
C -2.583063 -0.716945 1.995943  
C -0.178431 -0.428026 3.300780  
H 0.033354 1.473214 2.285690

C -2.156354 -1.738432 2.843824  
C -0.940387 -1.591762 3.500242  
H 0.773832 -0.322162 3.823294  
H -2.784063 -2.621286 2.979945  
H -0.570754 -2.372922 4.165937  
C -2.197968 2.654519 0.854973  
O -1.117654 3.059137 1.235810  
C -3.250796 3.627555 0.382402  
H -3.203822 3.732550 -0.707921  
H -4.268079 3.330747 0.665835  
H -3.005302 4.590708 0.842441

-----  
PCMopt/19\_TS\_RSk

Frequencies, energies and thermodynamic properties:

Lowest Vibrational Mode (1/cm) = -316.5823  
2nd Lowest Vibrational Mode (1/cm) = 20.5750  
E(RM062X) (a.u.) = -2588.51248008  
Thermal correction to Enthalpy (a.u.) = 0.663053  
Thermal correction to Gibbs Free Energy (a.u.) = 0.549598  
Total Entropy (cal/Kmol) = 238.787  
Esp(RM062X+D3) (a.u.) = -2591.11477816  
Esp(D3) (a.u.) = -0.0098081077  
Esp(RM062X) (a.u.) = -2591.1049700523

Optimised cartesian coordinates (Angstrom):

C 6.399048 3.019042 0.926780  
C 5.641956 4.195750 0.842055  
C 4.313079 4.161328 0.429161  
C 3.759858 2.923747 0.103139  
C 4.520345 1.756083 0.179686  
H 6.097268 5.150632 1.105253  
H 3.719034 5.073313 0.363918  
C 2.503768 0.886949 -0.518834  
C 2.049135 -1.495866 -0.809611  
C 3.541331 -1.574228 -1.186839  
C 4.357148 -0.711717 -0.240698  
H 5.390442 -0.616476 -0.598908  
S 2.126552 2.590372 -0.448661

|   |           |           |           |
|---|-----------|-----------|-----------|
| N | 3.779896  | 0.630731  | -0.197786 |
| N | 1.629317  | -0.078675 | -0.821699 |
| C | 4.088888  | -3.016631 | -1.299206 |
| C | 4.671154  | -3.578169 | 0.002099  |
| C | 5.135221  | -3.091480 | -2.413128 |
| H | 3.241758  | -3.655174 | -1.597814 |
| H | 5.613412  | -3.070887 | 0.261953  |
| H | 3.983551  | -3.487126 | 0.854443  |
| H | 4.903177  | -4.644215 | -0.130586 |
| H | 4.709104  | -2.799617 | -3.383227 |
| H | 5.985503  | -2.424996 | -2.198793 |
| H | 5.528943  | -4.113551 | -2.503987 |
| H | 3.610240  | -1.115448 | -2.186741 |
| H | 1.496622  | -1.976948 | -1.626541 |
| C | 1.703219  | -2.186511 | 0.492828  |
| C | 1.288481  | -3.522513 | 0.463772  |
| C | 1.855126  | -1.545819 | 1.725758  |
| C | 1.071441  | -4.222090 | 1.649450  |
| H | 1.137298  | -4.021914 | -0.496504 |
| C | 1.639632  | -2.245623 | 2.912997  |
| H | 2.122480  | -0.487681 | 1.771285  |
| C | 1.257675  | -3.586848 | 2.878001  |
| H | 0.752090  | -5.264491 | 1.613316  |
| H | 1.764239  | -1.736699 | 3.869716  |
| H | 1.089864  | -4.132141 | 3.807763  |
| C | -0.714051 | -0.749996 | -1.158739 |
| H | -0.475465 | -1.790077 | -0.956082 |
| C | -2.046167 | -0.353011 | -1.286814 |
| C | -2.986861 | -1.344775 | -1.915234 |
| F | -2.750008 | -1.414377 | -3.234857 |
| F | -2.821406 | -2.585601 | -1.438122 |
| F | -4.275174 | -1.027353 | -1.788356 |
| O | 0.041523  | 1.475400  | -1.336017 |
| C | 0.255009  | 0.287127  | -1.121725 |
| H | 4.377944  | -1.120414 | 0.780659  |
| C | 5.851505  | 1.782490  | 0.598081  |
| H | 6.443349  | 0.871186  | 0.674888  |

|   |           |           |           |
|---|-----------|-----------|-----------|
| H | 7.436389  | 3.068457  | 1.258365  |
| H | -2.232415 | 0.662172  | -1.652289 |
| C | -4.301743 | -3.270385 | 1.136440  |
| H | -4.164030 | -3.406920 | 2.217075  |
| H | -5.307195 | -3.583710 | 0.838822  |
| H | -3.544809 | -3.857314 | 0.600227  |
| C | -3.031832 | -1.301413 | 1.083465  |
| O | -4.193712 | -1.898653 | 0.787474  |
| O | -2.120968 | -1.887507 | 1.618030  |
| C | -1.815209 | 0.954512  | 0.980704  |
| C | -2.940478 | 0.082115  | 0.593311  |
| O | -0.724668 | 0.617287  | 1.415930  |
| N | -4.045465 | 0.922583  | 0.243925  |
| C | -3.559062 | 2.236044  | 0.096784  |
| C | -4.210290 | 3.389159  | -0.365769 |
| C | -2.238935 | 2.305284  | 0.563317  |
| C | -3.500143 | 4.586124  | -0.331409 |
| H | -5.228297 | 3.345648  | -0.743521 |
| C | -1.538395 | 3.510867  | 0.589309  |
| C | -2.176688 | 4.659166  | 0.138382  |
| H | -3.988599 | 5.493877  | -0.690287 |
| H | -0.508506 | 3.526266  | 0.950418  |
| H | -1.655306 | 5.616995  | 0.137924  |
| C | -5.435175 | 0.724064  | 0.374195  |
| O | -6.184280 | 1.289684  | -0.388214 |
| C | -5.972498 | -0.029334 | 1.567793  |
| H | -6.439149 | -0.967648 | 1.246646  |
| H | -5.212968 | -0.242875 | 2.324988  |
| H | -6.753861 | 0.614989  | 1.992492  |

-----

PCMopt/19\_TS\_RSI

Frequencies, energies and thermodynamic properties:

|                                                  |                |
|--------------------------------------------------|----------------|
| Lowest Vibrational Mode (1/cm) =                 | -269.5941      |
| 2nd Lowest Vibrational Mode (1/cm) =             | 11.8346        |
| E(RM062X) (a.u.) =                               | -2588.50423573 |
| Thermal correction to Enthalpy (a.u.) =          | 0.662701       |
| Thermal correction to Gibbs Free Energy (a.u.) = | 0.547480       |

|                            |                  |
|----------------------------|------------------|
| Total Entropy (cal/Kmol) = | 242.503          |
| Esp(RM062X+D3) (a.u.) =    | -2591.10894562   |
| Esp(D3) (a.u.) =           | -0.0102653301    |
| Esp(RM062X) (a.u.) =       | -2591.0986802899 |

Optimised cartesian coordinates (Angstrom):

|   |           |           |           |
|---|-----------|-----------|-----------|
| C | 7.392753  | -1.468930 | -0.434977 |
| C | 7.057697  | -2.820701 | -0.601456 |
| C | 5.746525  | -3.256578 | -0.441149 |
| C | 4.778760  | -2.308561 | -0.108731 |
| C | 5.117970  | -0.966813 | 0.065671  |
| H | 7.833454  | -3.540282 | -0.863487 |
| H | 5.479937  | -4.305371 | -0.573339 |
| C | 2.851016  | -0.869806 | 0.459934  |
| C | 1.620049  | 1.199908  | 0.861453  |
| C | 2.927407  | 1.691870  | 1.508122  |
| C | 4.120500  | 1.241409  | 0.688262  |
| H | 5.052024  | 1.391228  | 1.249307  |
| S | 3.063190  | -2.570268 | 0.137132  |
| N | 4.004080  | -0.190331 | 0.405766  |
| N | 1.672614  | -0.272331 | 0.720214  |
| C | 2.938241  | 3.210377  | 1.803079  |
| C | 3.464265  | 4.079671  | 0.656591  |
| C | 3.737006  | 3.488653  | 3.078181  |
| H | 1.891828  | 3.499381  | 1.996255  |
| H | 4.547046  | 3.935240  | 0.517706  |
| H | 2.963064  | 3.879110  | -0.300656 |
| H | 3.308262  | 5.139500  | 0.901725  |
| H | 3.310470  | 2.959977  | 3.942077  |
| H | 4.784412  | 3.167818  | 2.963687  |
| H | 3.742066  | 4.564591  | 3.301830  |
| H | 2.980385  | 1.166920  | 2.475907  |
| H | 0.839154  | 1.411220  | 1.596433  |
| C | 1.267400  | 1.878000  | -0.445762 |
| C | 0.345520  | 2.928068  | -0.441397 |
| C | 1.920847  | 1.551239  | -1.642345 |
| C | 0.118053  | 3.676820  | -1.596240 |
| H | -0.197407 | 3.170981  | 0.475182  |

C 1.696299 2.300605 -2.796172  
H 2.622289 0.714197 -1.685712  
C 0.805871 3.376114 -2.770397  
H -0.610353 4.487631 -1.577082  
H 2.219172 2.042326 -3.717987  
H 0.632706 3.963454 -3.673178  
C -0.754260 -0.432950 1.163856  
H -0.835468 0.630560 1.368866  
C -1.881302 -1.222894 1.273078  
C -2.919207 -0.747556 2.254854  
F -2.408185 -0.788081 3.497165  
F -3.289796 0.517270 2.041932  
F -4.016289 -1.501789 2.290733  
O 0.602450 -2.274912 0.605943  
C 0.475140 -1.075058 0.805720  
H 4.199678 1.780072 -0.267523  
C 6.430887 -0.521761 -0.099842  
H 6.697823 0.527519 0.019127  
H 8.425996 -1.149549 -0.572026  
H -1.784094 -2.310710 1.219268  
C 0.200145 -1.718525 -2.390887  
H -0.181492 -2.180602 -3.311658  
H 0.910139 -0.919830 -2.635444  
H 0.682209 -2.486715 -1.772549  
C -1.906850 -1.879713 -1.374942  
O -0.855848 -1.100198 -1.672395  
O -1.888956 -3.075537 -1.571942  
C -4.241885 -1.862426 -0.380099  
C -3.003487 -1.156367 -0.733458  
O -4.424939 -3.061346 -0.219626  
N -3.311407 0.243229 -0.872824  
C -4.633481 0.444440 -0.423167  
C -5.370746 1.625977 -0.261050  
C -5.235108 -0.792318 -0.164609  
C -6.697669 1.510935 0.150372  
H -4.922888 2.599433 -0.434661  
C -6.557770 -0.896634 0.258223



|   |           |           |           |
|---|-----------|-----------|-----------|
| C | -7.298426 | 0.269669  | 0.414167  |
| H | -7.282141 | 2.423620  | 0.281088  |
| H | -6.982220 | -1.882452 | 0.457842  |
| H | -8.336544 | 0.227811  | 0.745529  |
| C | -2.641370 | 1.304650  | -1.501833 |
| O | -2.799647 | 2.432309  | -1.079785 |
| C | -1.886969 | 1.080551  | -2.789710 |
| H | -2.165534 | 0.150015  | -3.293450 |
| H | -2.124957 | 1.945263  | -3.422406 |
| H | -0.806035 | 1.080640  | -2.602949 |

-----  
 PCMopt/19\_TS\_SRa

Frequencies, energies and thermodynamic properties:

|                                                  |                  |
|--------------------------------------------------|------------------|
| Lowest Vibrational Mode (1/cm) =                 | -122.3676        |
| 2nd Lowest Vibrational Mode (1/cm) =             | 17.4758          |
| E(RM062X) (a.u.) =                               | -2588.52559975   |
| Thermal correction to Enthalpy (a.u.) =          | 0.663404         |
| Thermal correction to Gibbs Free Energy (a.u.) = | 0.549077         |
| Total Entropy (cal/Kmol) =                       | 240.622          |
| Esp(RM062X+D3) (a.u.) =                          | -2591.13326489   |
| Esp(D3) (a.u.) =                                 | -0.0108409848    |
| Esp(RM062X) (a.u.) =                             | -2591.1224239052 |

Optimised cartesian coordinates (Angstrom):

|   |           |           |           |
|---|-----------|-----------|-----------|
| C | -6.975029 | 1.901635  | 0.529154  |
| C | -6.699817 | 3.179836  | 0.020419  |
| C | -5.424148 | 3.513540  | -0.421137 |
| C | -4.429495 | 2.538769  | -0.338735 |
| C | -4.704749 | 1.271090  | 0.175540  |
| H | -7.496643 | 3.921736  | -0.033356 |
| H | -5.205651 | 4.503802  | -0.821012 |
| C | -2.477109 | 1.029523  | -0.340241 |
| C | -1.177128 | -1.028957 | 0.003918  |
| C | -2.176677 | -1.277819 | 1.144745  |
| C | -3.579801 | -0.911434 | 0.699815  |
| H | -4.271774 | -0.928306 | 1.550999  |
| S | -2.752848 | 2.679303  | -0.825042 |
| N | -3.569081 | 0.453762  | 0.171185  |

|   |           |           |           |
|---|-----------|-----------|-----------|
| N | -1.308820 | 0.368604  | -0.472930 |
| C | -2.090403 | -2.703923 | 1.737269  |
| C | -3.010355 | -3.728757 | 1.066641  |
| C | -2.360300 | -2.660614 | 3.242404  |
| H | -1.051063 | -3.041161 | 1.594732  |
| H | -4.067676 | -3.517541 | 1.290683  |
| H | -2.888231 | -3.761808 | -0.025169 |
| H | -2.789919 | -4.731097 | 1.459756  |
| H | -1.639920 | -2.012789 | 3.763053  |
| H | -3.370959 | -2.275084 | 3.450136  |
| H | -2.292433 | -3.668153 | 3.676536  |
| H | -1.880010 | -0.564435 | 1.930048  |
| H | -0.183615 | -1.087429 | 0.463079  |
| C | -1.252357 | -2.019681 | -1.136381 |
| C | -0.382523 | -3.116504 | -1.132780 |
| C | -2.197967 | -1.897271 | -2.159101 |
| C | -0.483051 | -4.097907 | -2.117410 |
| H | 0.379327  | -3.199989 | -0.350831 |
| C | -2.297641 | -2.879375 | -3.144975 |
| H | -2.862055 | -1.029910 | -2.201543 |
| C | -1.446984 | -3.984848 | -3.120512 |
| H | 0.197422  | -4.950238 | -2.104319 |
| H | -3.040911 | -2.777245 | -3.936646 |
| H | -1.526230 | -4.752073 | -3.891785 |
| C | 1.028940  | 0.269248  | -1.255316 |
| H | 1.006086  | -0.818606 | -1.284826 |
| C | 2.197235  | 0.930731  | -1.487534 |
| C | 3.277775  | 0.263177  | -2.286743 |
| F | 2.941177  | 0.304678  | -3.590496 |
| F | 4.454396  | 0.862847  | -2.187094 |
| F | 3.427603  | -1.028834 | -1.982376 |
| O | -0.304282 | 2.218047  | -1.333953 |
| C | -0.182689 | 1.042193  | -1.044389 |
| H | -3.965912 | -1.587031 | -0.078102 |
| C | -5.985458 | 0.928586  | 0.614314  |
| H | -6.210635 | -0.064315 | 1.001277  |
| H | -7.984556 | 1.661361  | 0.863012  |

|   |           |           |           |
|---|-----------|-----------|-----------|
| H | 2.214703  | 2.021083  | -1.549562 |
| C | 5.540573  | 3.784475  | 0.328440  |
| H | 6.092221  | 3.709919  | 1.275424  |
| H | 6.239102  | 3.891723  | -0.507003 |
| H | 4.874358  | 4.656122  | 0.378851  |
| C | 3.899902  | 2.265921  | 1.013278  |
| O | 4.801017  | 2.599454  | 0.080501  |
| O | 3.666486  | 2.982510  | 1.965706  |
| C | 4.172064  | -0.197673 | 0.565163  |
| O | 5.318860  | -0.262950 | 0.142309  |
| C | 3.298331  | 0.959927  | 0.743329  |
| N | 2.156648  | 0.543147  | 1.501051  |
| C | 2.218444  | -0.857438 | 1.682790  |
| C | 1.346930  | -1.742220 | 2.335292  |
| C | 3.391107  | -1.341055 | 1.093546  |
| C | 1.682355  | -3.097774 | 2.339595  |
| H | 0.448065  | -1.385690 | 2.828805  |
| C | 3.718002  | -2.693366 | 1.102797  |
| C | 2.845266  | -3.582999 | 1.724221  |
| H | 1.015808  | -3.797327 | 2.849053  |
| H | 4.644496  | -3.025882 | 0.631086  |
| H | 3.067955  | -4.650226 | 1.749754  |
| C | 0.999464  | 1.261066  | 1.746954  |
| O | 0.048241  | 0.737736  | 2.312172  |
| C | 0.930709  | 2.709643  | 1.338210  |
| H | 1.362157  | 3.322030  | 2.139391  |
| H | 1.477867  | 2.929031  | 0.415865  |
| H | -0.128676 | 2.957026  | 1.208507  |

-----  
 PCMopt/19\_TS\_SRb

Frequencies, energies and thermodynamic properties:

|                                                  |                |
|--------------------------------------------------|----------------|
| Lowest Vibrational Mode (1/cm) =                 | -187.8946      |
| 2nd Lowest Vibrational Mode (1/cm) =             | 17.4668        |
| E(RM062X) (a.u.) =                               | -2588.52262058 |
| Thermal correction to Enthalpy (a.u.) =          | 0.663112       |
| Thermal correction to Gibbs Free Energy (a.u.) = | 0.547920       |
| Total Entropy (cal/Kmol) =                       | 242.441        |

Esp(RM062X+D3) (a.u.) = -2591.12879105

Esp(D3) (a.u.) = -0.0101053823

Esp(RM062X) (a.u.) = -2591.1186856677

Optimised cartesian coordinates (Angstrom):

C 7.329631 -2.141770 0.657149

C 7.031492 -3.372614 0.055072

C 5.755165 -3.640411 -0.430032

C 4.785060 -2.647101 -0.299829

C 5.083540 -1.426715 0.308021

H 7.809682 -4.130336 -0.037449

H 5.518422 -4.595028 -0.900499

C 2.874029 -1.084771 -0.236992

C 1.655309 1.002869 0.150005

C 2.581680 1.123200 1.372931

C 3.997471 0.733621 0.986721

H 4.633109 0.648530 1.877501

S 3.106377 -2.715926 -0.802933

N 3.970159 -0.579460 0.341404

N 1.745317 -0.373144 -0.384273

C 2.509871 2.494085 2.084569

C 3.484790 3.543742 1.540909

C 2.727543 2.315339 3.588909

H 1.484142 2.874222 1.937647

H 4.523164 3.283695 1.798572

H 3.420406 3.667854 0.451293

H 3.270133 4.516939 2.003839

H 1.979825 1.640875 4.030173

H 3.724571 1.895202 3.793947

H 2.662663 3.283634 4.104319

H 2.213461 0.360488 2.080307

H 0.628799 1.095165 0.528305

C 1.878527 2.046167 -0.924304

C 1.095667 3.206160 -0.915827

C 2.874099 1.902180 -1.895834

C 1.325728 4.222089 -1.841483

H 0.299277 3.317576 -0.175379

C 3.105454 2.919244 -2.822524

|   |           |           |           |
|---|-----------|-----------|-----------|
| H | 3.474339  | 0.990277  | -1.946317 |
| C | 2.337448  | 4.083251  | -2.792610 |
| H | 0.709720  | 5.121944  | -1.822583 |
| H | 3.886835  | 2.797471  | -3.573657 |
| H | 2.518935  | 4.876770  | -3.518602 |
| C | -0.509832 | -0.127536 | -1.330587 |
| H | -0.353531 | 0.939981  | -1.477941 |
| C | -1.763425 | -0.686245 | -1.404572 |
| C | -2.815665 | -0.040843 | -2.257494 |
| F | -2.528647 | -0.209706 | -3.555325 |
| F | -4.029477 | -0.562930 | -2.069547 |
| F | -2.912429 | 1.278586  | -2.056751 |
| O | 0.618258  | -2.202520 | -1.136861 |
| C | 0.579592  | -0.998195 | -0.969793 |
| H | 4.456086  | 1.459211  | 0.298234  |
| C | 6.362730  | -1.150807 | 0.793308  |
| H | 6.603752  | -0.193571 | 1.254054  |
| H | 8.338250  | -1.952574 | 1.024926  |
| H | -1.831678 | -1.776804 | -1.363619 |
| C | -0.932554 | 0.738868  | 3.350056  |
| H | -0.095704 | 1.200573  | 2.803810  |
| H | -1.317697 | 1.441557  | 4.095126  |
| H | -0.572535 | -0.176833 | 3.836852  |
| C | -1.753168 | -0.424734 | 1.483754  |
| O | -2.007064 | 0.457858  | 2.468731  |
| O | -0.688030 | -1.000081 | 1.402418  |
| C | -3.432003 | -1.947648 | 0.443904  |
| O | -2.826044 | -3.003817 | 0.326236  |
| C | -2.866797 | -0.589385 | 0.546918  |
| N | -3.976832 | 0.324037  | 0.656204  |
| C | -5.181632 | -0.399673 | 0.624142  |
| C | -6.511635 | 0.039143  | 0.668776  |
| C | -4.896076 | -1.766771 | 0.496814  |
| C | -7.512253 | -0.930992 | 0.601066  |
| H | -6.751996 | 1.092807  | 0.762841  |
| C | -5.903305 | -2.725666 | 0.424579  |
| C | -7.226655 | -2.299548 | 0.482162  |

|   |           |           |           |
|---|-----------|-----------|-----------|
| H | -8.553946 | -0.607840 | 0.645999  |
| H | -5.640731 | -3.780331 | 0.323982  |
| H | -8.042277 | -3.021700 | 0.433444  |
| C | -3.908879 | 1.705955  | 0.661700  |
| O | -4.911006 | 2.382565  | 0.792626  |
| C | -2.559849 | 2.370422  | 0.500068  |
| H | -2.276073 | 2.811512  | 1.464846  |
| H | -1.765919 | 1.698288  | 0.160081  |
| H | -2.686550 | 3.180195  | -0.228958 |

-----

PCMopt/19\_TS\_SRc

Frequencies, energies and thermodynamic properties:

|                                                  |                  |
|--------------------------------------------------|------------------|
| Lowest Vibrational Mode (1/cm) =                 | -166.3487        |
| 2nd Lowest Vibrational Mode (1/cm) =             | 18.3491          |
| E(RM062X) (a.u.) =                               | -2588.52002254   |
| Thermal correction to Enthalpy (a.u.) =          | 0.662951         |
| Thermal correction to Gibbs Free Energy (a.u.) = | 0.547573         |
| Total Entropy (cal/Kmol) =                       | 242.833          |
| Esp(RM062X+D3) (a.u.) =                          | -2591.12610911   |
| Esp(D3) (a.u.) =                                 | -0.0101724039    |
| Esp(RM062X) (a.u.) =                             | -2591.1159367061 |

Optimised cartesian coordinates (Angstrom):

|   |          |           |           |
|---|----------|-----------|-----------|
| C | 7.433650 | -1.664924 | 0.693010  |
| C | 7.259596 | -2.920814 | 0.094144  |
| C | 6.019794 | -3.309317 | -0.404036 |
| C | 4.958903 | -2.411676 | -0.289508 |
| C | 5.134136 | -1.166024 | 0.315536  |
| H | 8.106533 | -3.602429 | 0.014297  |
| H | 5.879387 | -4.283666 | -0.872321 |
| C | 2.909040 | -1.034646 | -0.256484 |
| C | 1.490892 | 0.933262  | 0.105289  |
| C | 2.392317 | 1.148726  | 1.334571  |
| C | 3.842928 | 0.885552  | 0.970915  |
| H | 4.469089 | 0.861886  | 1.872004  |
| S | 3.300200 | -2.639172 | -0.812950 |
| N | 3.946037 | -0.427007 | 0.332737  |
| N | 1.720869 | -0.434372 | -0.418560 |

|   |           |           |           |
|---|-----------|-----------|-----------|
| C | 2.194187  | 2.515535  | 2.030644  |
| C | 3.049164  | 3.653103  | 1.460560  |
| C | 2.460942  | 2.384435  | 3.532496  |
| H | 1.132399  | 2.786259  | 1.895145  |
| H | 4.112217  | 3.503786  | 1.705984  |
| H | 2.957591  | 3.759645  | 0.371384  |
| H | 2.742588  | 4.603647  | 1.919001  |
| H | 1.805359  | 1.638213  | 4.002744  |
| H | 3.503175  | 2.082794  | 3.720043  |
| H | 2.299502  | 3.347628  | 4.036183  |
| H | 2.088878  | 0.363423  | 2.047941  |
| H | 0.450200  | 0.941497  | 0.461484  |
| C | 1.636422  | 1.984254  | -0.974945 |
| C | 0.710778  | 3.033499  | -1.017982 |
| C | 2.691435  | 1.960772  | -1.892745 |
| C | 0.867420  | 4.070101  | -1.937124 |
| H | -0.145384 | 3.018298  | -0.337528 |
| C | 2.846159  | 2.998241  | -2.812547 |
| H | 3.400512  | 1.129047  | -1.906029 |
| C | 1.941404  | 4.060107  | -2.828573 |
| H | 0.143122  | 4.885484  | -1.962441 |
| H | 3.675054  | 2.973437  | -3.521119 |
| H | 2.064185  | 4.871333  | -3.547459 |
| C | -0.524581 | -0.376152 | -1.390042 |
| H | -0.451108 | 0.701320  | -1.519876 |
| C | -1.744739 | -0.981372 | -1.437669 |
| C | -2.829702 | -0.332096 | -2.248049 |
| F | -2.599429 | -0.527079 | -3.556013 |
| F | -4.043811 | -0.829268 | -2.007383 |
| F | -2.896233 | 0.990614  | -2.067475 |
| O | 0.774108  | -2.353126 | -1.207936 |
| C | 0.629376  | -1.161539 | -1.022398 |
| H | 4.245663  | 1.646935  | 0.286508  |
| C | 6.376257  | -0.768878 | 0.813136  |
| H | 6.521441  | 0.208984  | 1.270929  |
| H | 8.415684  | -1.379840 | 1.070820  |
| H | -1.825469 | -2.068847 | -1.346198 |

|   |           |           |           |
|---|-----------|-----------|-----------|
| C | -0.693381 | 0.297935  | 3.390403  |
| H | -0.013395 | 0.948164  | 2.819411  |
| H | -1.054242 | 0.837280  | 4.272020  |
| H | -0.154422 | -0.609289 | 3.693661  |
| C | -1.616768 | -0.766539 | 1.513858  |
| O | -1.829081 | -0.010779 | 2.607783  |
| O | -0.567662 | -1.348749 | 1.333370  |
| C | -3.558125 | -2.035690 | 0.526100  |
| O | -3.151096 | -3.191611 | 0.418064  |
| C | -2.786641 | -0.812617 | 0.634487  |
| N | -3.698496 | 0.293503  | 0.723790  |
| C | -5.017930 | -0.191844 | 0.675421  |
| C | -6.259794 | 0.456255  | 0.701294  |
| C | -4.971921 | -1.594259 | 0.562719  |
| C | -7.412058 | -0.329393 | 0.633835  |
| H | -6.365139 | 1.532930  | 0.785564  |
| C | -6.126411 | -2.366172 | 0.488203  |
| C | -7.361746 | -1.725263 | 0.529059  |
| H | -8.381745 | 0.170020  | 0.668107  |
| H | -6.042194 | -3.450849 | 0.398605  |
| H | -8.286856 | -2.300223 | 0.478150  |
| C | -3.200653 | 1.580516  | 0.643039  |
| O | -1.999033 | 1.766369  | 0.548110  |
| C | -4.175429 | 2.726402  | 0.669247  |
| H | -4.835220 | 2.685125  | -0.208442 |
| H | -4.793794 | 2.702428  | 1.575716  |
| H | -3.597825 | 3.655344  | 0.644664  |

-----

PCMopt/19\_TS\_SRd

Frequencies, energies and thermodynamic properties:

|                                                  |                |
|--------------------------------------------------|----------------|
| Lowest Vibrational Mode (1/cm) =                 | -266.6194      |
| 2nd Lowest Vibrational Mode (1/cm) =             | 11.6579        |
| E(RM062X) (a.u.) =                               | -2588.52103617 |
| Thermal correction to Enthalpy (a.u.) =          | 0.663011       |
| Thermal correction to Gibbs Free Energy (a.u.) = | 0.547133       |
| Total Entropy (cal/Kmol) =                       | 243.886        |
| Esp(RM062X+D3) (a.u.) =                          | -2591.12571373 |



Esp(D3) (a.u.) = -0.0105930572  
Esp(RM062X) (a.u.) = -2591.1151206728

Optimised cartesian coordinates (Angstrom):

C 6.477913 -2.782170 -0.101138  
C 5.888807 -3.956932 -0.590957  
C 4.529134 -4.006093 -0.880394  
C 3.771277 -2.855134 -0.663844  
C 4.359818 -1.690889 -0.168813  
H 6.503726 -4.842726 -0.750877  
H 4.066226 -4.914726 -1.265989  
C 2.179873 -0.984833 -0.404714  
C 1.373826 1.272264 0.139870  
C 2.551003 1.280722 1.131505  
C 3.778094 0.658752 0.492995  
H 4.571248 0.519682 1.237817  
S 2.057813 -2.632180 -0.958387  
N 3.423107 -0.661465 -0.025347  
N 1.164063 -0.103967 -0.368854  
C 2.840449 2.664508 1.756488  
C 3.775410 3.555383 0.930205  
C 3.419994 2.495716 3.163209  
H 1.866726 3.174460 1.854159  
H 4.802509 3.158396 0.942758  
H 3.461513 3.664330 -0.116231  
H 3.812060 4.558846 1.376924  
H 2.743742 1.932050 3.820156  
H 4.382583 1.961888 3.131586  
H 3.602253 3.477362 3.622185  
H 2.240227 0.610151 1.949751  
H 0.481815 1.509628 0.733771  
C 1.488250 2.267016 -0.995545  
C 0.863634 3.512566 -0.871235  
C 2.243662 1.992085 -2.139609  
C 1.022513 4.484062 -1.857474  
H 0.249656 3.723992 0.008624  
C 2.403250 2.964139 -3.127660  
H 2.710205 1.012925 -2.275460

C 1.800389 4.213931 -2.984494  
H 0.533289 5.452778 -1.748194  
H 2.998175 2.740901 -4.014159  
H 1.925619 4.972930 -3.757820  
C -1.166398 0.483895 -0.910900  
H -1.007002 1.519195 -0.626425  
C -2.432044 0.038831 -1.237718  
C -3.445481 1.030927 -1.721736  
F -3.218227 1.333271 -3.010859  
F -4.696296 0.564132 -1.664269  
F -3.403460 2.181539 -1.047775  
O -0.226850 -1.644349 -1.308134  
C -0.122558 -0.495560 -0.897676  
H 4.176720 1.269748 -0.331121  
C 5.725639 -1.632536 0.116018  
H 6.194416 -0.722098 0.487006  
H 7.546822 -2.764189 0.112228  
H -2.528725 -0.944049 -1.703045  
C -6.570253 -2.126890 -0.606533  
H -6.475900 -3.220599 -0.603657  
H -7.533413 -1.827406 -0.183175  
H -6.477615 -1.764419 -1.639386  
C -4.312523 -1.718449 -0.175702  
O -5.573349 -1.532296 0.212644  
O -4.027891 -2.461621 -1.091855  
C -3.800728 0.394341 1.222585  
O -4.850295 1.015445 1.125567  
C -3.374674 -0.847412 0.563199  
N -2.142130 -1.273290 1.167553  
C -1.648322 -0.198475 1.933074  
C -0.455751 -0.062096 2.665957  
C -2.611013 0.819228 1.980391  
C -0.264664 1.123334 3.373521  
H 0.294615 -0.845920 2.673653  
C -2.399847 2.006858 2.677932  
C -1.205477 2.166301 3.371746  
H 0.655564 1.241728 3.948855

|   |           |           |           |
|---|-----------|-----------|-----------|
| H | -3.173870 | 2.776520  | 2.672840  |
| H | -1.002610 | 3.082414  | 3.927332  |
| C | -1.493153 | -2.507596 | 1.153264  |
| O | -0.339698 | -2.588281 | 1.525957  |
| C | -2.252707 | -3.732678 | 0.726539  |
| H | -3.274851 | -3.746147 | 1.123672  |
| H | -2.313179 | -3.770814 | -0.366994 |
| H | -1.690379 | -4.595249 | 1.098506  |

-----  
 PCMopt/19\_TS\_SRe

Frequencies, energies and thermodynamic properties:

|                                                  |                  |
|--------------------------------------------------|------------------|
| Lowest Vibrational Mode (1/cm) =                 | -247.5010        |
| 2nd Lowest Vibrational Mode (1/cm) =             | 17.2205          |
| E(RM062X) (a.u.) =                               | -2588.52333833   |
| Thermal correction to Enthalpy (a.u.) =          | 0.663536         |
| Thermal correction to Gibbs Free Energy (a.u.) = | 0.547826         |
| Total Entropy (cal/Kmol) =                       | 243.532          |
| Esp(RM062X+D3) (a.u.) =                          | -2591.12576288   |
| Esp(D3) (a.u.) =                                 | -0.0100272652    |
| Esp(RM062X) (a.u.) =                             | -2591.1157356148 |

Optimised cartesian coordinates (Angstrom):

|   |           |           |           |
|---|-----------|-----------|-----------|
| C | -6.641142 | 2.873456  | 0.195362  |
| C | -6.137839 | 3.930576  | -0.575439 |
| C | -4.835748 | 3.899066  | -1.066637 |
| C | -4.050535 | 2.786197  | -0.769478 |
| C | -4.552813 | 1.739372  | 0.005462  |
| H | -6.773598 | 4.788083  | -0.796472 |
| H | -4.439492 | 4.717561  | -1.668086 |
| C | -2.435778 | 0.944941  | -0.433136 |
| C | -1.575632 | -1.219534 | 0.317939  |
| C | -2.517329 | -0.991785 | 1.512791  |
| C | -3.848813 | -0.442902 | 1.030658  |
| H | -4.463121 | -0.114763 | 1.879194  |
| S | -2.385449 | 2.491371  | -1.241191 |
| N | -3.603038 | 0.728802  | 0.189910  |
| N | -1.449998 | 0.043004  | -0.442671 |
| C | -2.673221 | -2.227070 | 2.429030  |

C -3.814192 -3.169904 2.034169  
C -2.841764 -1.781772 3.883059  
H -1.727379 -2.789516 2.362772  
H -4.793277 -2.702023 2.221935  
H -3.773238 -3.473360 0.978695  
H -3.767351 -4.080262 2.648122  
H -1.978280 -1.193402 4.223701  
H -3.745367 -1.163322 4.002468  
H -2.946491 -2.653586 4.544083  
H -2.028548 -0.198890 2.102734  
H -0.576865 -1.391048 0.742306  
C -1.962455 -2.372253 -0.584734  
C -1.362545 -3.621378 -0.393486  
C -2.940866 -2.234079 -1.575418  
C -1.759707 -4.723390 -1.148902  
H -0.574256 -3.732089 0.354293  
C -3.339320 -3.335449 -2.333112  
H -3.397638 -1.260861 -1.771745  
C -2.756327 -4.584082 -2.115402  
H -1.284824 -5.691685 -0.985812  
H -4.106136 -3.214959 -3.099437  
H -3.068890 -5.444734 -2.708187  
C 0.778327 -0.679316 -1.176526  
H 0.526967 -1.720641 -0.995227  
C 2.097137 -0.298979 -1.341991  
C 3.062987 -1.272852 -1.949143  
F 2.637149 -1.691709 -3.147097  
F 4.261454 -0.713426 -2.153777  
F 3.250226 -2.375756 -1.212024  
O -0.028672 1.524774 -1.442780  
C -0.181675 0.372982 -1.059209  
H -4.421189 -1.183794 0.452512  
C -5.858500 1.762958 0.497449  
H -6.259234 0.940662 1.089058  
H -7.665798 2.916481 0.565092  
H 2.296090 0.728183 -1.660990  
C 2.095151 -3.134366 2.111823

|   |          |           |           |
|---|----------|-----------|-----------|
| H | 2.266851 | -2.897895 | 3.169714  |
| H | 1.119538 | -3.613149 | 1.987131  |
| H | 2.891982 | -3.804981 | 1.763457  |
| C | 3.167391 | -1.194923 | 1.392449  |
| O | 2.066243 | -1.948529 | 1.329228  |
| O | 4.122984 | -1.500898 | 2.068746  |
| C | 1.907216 | 0.907281  | 1.001735  |
| O | 0.783701 | 0.546692  | 1.337722  |
| C | 3.031166 | 0.049774  | 0.603083  |
| N | 4.178307 | 0.905290  | 0.436177  |
| C | 3.747047 | 2.249059  | 0.501716  |
| C | 4.439005 | 3.451978  | 0.281930  |
| C | 2.384301 | 2.284990  | 0.829184  |
| C | 3.726603 | 4.642148  | 0.415413  |
| H | 5.491897 | 3.458192  | 0.025858  |
| C | 1.681003 | 3.481690  | 0.961001  |
| C | 2.363034 | 4.672909  | 0.750750  |
| H | 4.255011 | 5.583310  | 0.252780  |
| H | 0.618674 | 3.457096  | 1.209910  |
| H | 1.847546 | 5.629699  | 0.840468  |
| C | 5.501342 | 0.564523  | 0.162641  |
| O | 6.335775 | 1.439057  | 0.032274  |
| C | 5.931129 | -0.878685 | 0.059092  |
| H | 6.398287 | -1.152622 | 1.013784  |
| H | 5.138658 | -1.595201 | -0.148045 |
| H | 6.690230 | -0.915920 | -0.731085 |

-----  
 PCMopt/19\_TS\_SRF

Frequencies, energies and thermodynamic properties:

|                                                  |                |
|--------------------------------------------------|----------------|
| Lowest Vibrational Mode (1/cm) =                 | -269.6023      |
| 2nd Lowest Vibrational Mode (1/cm) =             | 16.5703        |
| E(RM062X) (a.u.) =                               | -2588.52557942 |
| Thermal correction to Enthalpy (a.u.) =          | 0.663568       |
| Thermal correction to Gibbs Free Energy (a.u.) = | 0.548583       |
| Total Entropy (cal/Kmol) =                       | 242.005        |
| Esp(RM062X+D3) (a.u.) =                          | -2591.12625054 |
| Esp(D3) (a.u.) =                                 | -0.0099017970  |

Esp(RM062X) (a.u.) = -2591.1163487430

Optimised cartesian coordinates (Angstrom):

|   |          |           |           |
|---|----------|-----------|-----------|
| C | 7.015790 | -2.326315 | 0.394980  |
| C | 6.712099 | -3.389684 | -0.465803 |
| C | 5.454333 | -3.496066 | -1.053609 |
| C | 4.509750 | -2.513289 | -0.762716 |
| C | 4.813514 | -1.460308 | 0.102891  |
| H | 7.469708 | -4.143249 | -0.681447 |
| H | 5.213809 | -4.321285 | -1.724276 |
| C | 2.648289 | -0.914199 | -0.459123 |
| C | 1.484352 | 1.094875  | 0.300519  |
| C | 2.326344 | 0.900935  | 1.571364  |
| C | 3.753717 | 0.535206  | 1.201606  |
| H | 4.316910 | 0.213281  | 2.087712  |
| S | 2.853393 | -2.408997 | -1.337782 |
| N | 3.728920 | -0.592693 | 0.268056  |
| N | 1.564876 | -0.139771 | -0.513628 |
| C | 2.237324 | 2.087889  | 2.556987  |
| C | 3.287227 | 3.180211  | 2.332270  |
| C | 2.310839 | 1.579544  | 3.998189  |
| H | 1.239553 | 2.535226  | 2.412486  |
| H | 4.293208 | 2.819348  | 2.598524  |
| H | 3.313463 | 3.540646  | 1.294401  |
| H | 3.069051 | 4.039716  | 2.981721  |
| H | 1.497132 | 0.872935  | 4.214188  |
| H | 3.267488 | 1.066675  | 4.185890  |
| H | 2.237494 | 2.415785  | 4.707823  |
| H | 1.877281 | 0.024253  | 2.066771  |
| H | 0.438483 | 1.153391  | 0.628409  |
| C | 1.825714 | 2.329044  | -0.505439 |
| C | 1.046916 | 3.478635  | -0.326537 |
| C | 2.915130 | 2.370821  | -1.382059 |
| C | 1.380445 | 4.664545  | -0.979556 |
| H | 0.168055 | 3.427903  | 0.321590  |
| C | 3.246920 | 3.556886  | -2.037597 |
| H | 3.512337 | 1.474297  | -1.567696 |
| C | 2.486885 | 4.708324  | -1.829282 |

H 0.769625 5.556145 -0.830474  
H 4.100916 3.579531 -2.715993  
H 2.748496 5.635553 -2.341077  
C -0.641338 0.379049 -1.407928  
H -0.431060 1.439245 -1.294402  
C -1.955316 -0.042402 -1.530482  
C -2.902050 0.837527 -2.289467  
F -2.529314 0.942133 -3.570827  
F -4.149330 0.352592 -2.306545  
F -2.955207 2.085585 -1.807134  
O 0.344759 -1.773898 -1.556992  
C 0.371069 -0.604534 -1.200778  
H 4.290716 1.373943 0.733737  
C 6.072792 -1.346645 0.692644  
H 6.316327 -0.517359 1.355944  
H 8.008683 -2.259860 0.840190  
H -2.137589 -1.101920 -1.736174  
C -3.628603 2.849747 2.488089  
H -3.523737 3.651453 1.744728  
H -4.555365 2.976289 3.055253  
H -2.762655 2.871798 3.162173  
C -2.699927 1.239207 1.059951  
O -3.726403 1.585143 1.843646  
O -1.695495 1.908006 0.970861  
C -1.873516 -1.057060 0.882725  
O -0.703229 -0.826491 1.163000  
C -2.869296 -0.081164 0.412432  
N -4.141620 -0.757911 0.391264  
C -3.917845 -2.136821 0.596127  
C -4.796107 -3.230669 0.536913  
C -2.561102 -2.353135 0.880682  
C -4.268102 -4.498226 0.777297  
H -5.849408 -3.096559 0.319893  
C -2.043486 -3.625298 1.121125  
C -2.910518 -4.709317 1.066816  
H -4.942101 -5.355893 0.738578  
H -0.979821 -3.743232 1.335176

H -2.544065 -5.720752 1.244882  
C -5.408418 -0.239427 0.135341  
O -6.378594 -0.970870 0.153842  
C -5.603732 1.232517 -0.141585  
H -6.052897 1.681289 0.754183  
H -4.705095 1.790822 -0.402450  
H -6.328665 1.296819 -0.961817

-----  
PCMopt/19\_TS\_SRg

Frequencies, energies and thermodynamic properties:

Lowest Vibrational Mode (1/cm) = -252.1977  
2nd Lowest Vibrational Mode (1/cm) = 19.4310  
E(RM062X) (a.u.) = -2588.52348235  
Thermal correction to Enthalpy (a.u.) = 0.663389  
Thermal correction to Gibbs Free Energy (a.u.) = 0.547941  
Total Entropy (cal/Kmol) = 242.981  
Esp(RM062X+D3) (a.u.) = -2591.12562243  
Esp(D3) (a.u.) = -0.0103192487  
Esp(RM062X) (a.u.) = -2591.1153031813

Optimised cartesian coordinates (Angstrom):

C -7.207220 -1.591688 -1.066478  
C -7.142915 -2.753523 -0.283907  
C -5.987004 -3.078583 0.419233  
C -4.897764 -2.213123 0.322798  
C -4.962623 -1.062460 -0.464974  
H -8.010112 -3.411132 -0.222254  
H -5.932463 -3.980225 1.029480  
C -2.826030 -0.869706 0.364651  
C -1.355088 1.031949 -0.064835  
C -2.055210 1.069045 -1.429768  
C -3.547227 0.854609 -1.253799  
H -4.037901 0.679707 -2.220266  
S -3.323523 -2.379531 1.078859  
N -3.763738 -0.342062 -0.433659  
N -1.646005 -0.269824 0.581726  
C -1.699765 2.324791 -2.257119  
C -2.643299 3.511306 -2.043105



|   |           |           |           |
|---|-----------|-----------|-----------|
| C | -1.624338 | 1.964682  | -3.741944 |
| H | -0.687045 | 2.623293  | -1.937268 |
| H | -3.639086 | 3.303641  | -2.465579 |
| H | -2.765916 | 3.770849  | -0.981956 |
| H | -2.248286 | 4.395795  | -2.562490 |
| H | -0.864148 | 1.190680  | -3.918716 |
| H | -2.592828 | 1.585354  | -4.105001 |
| H | -1.365773 | 2.847878  | -4.343195 |
| H | -1.646590 | 0.200009  | -1.972239 |
| H | -0.281514 | 1.025036  | -0.286270 |
| C | -1.663287 | 2.196393  | 0.852416  |
| C | -0.762912 | 3.267899  | 0.895958  |
| C | -2.834237 | 2.256481  | 1.616800  |
| C | -1.049701 | 4.398401  | 1.660550  |
| H | 0.169461  | 3.198100  | 0.330129  |
| C | -3.118852 | 3.387030  | 2.382862  |
| H | -3.536174 | 1.418815  | 1.629852  |
| C | -2.231948 | 4.464084  | 2.398709  |
| H | -0.342870 | 5.229121  | 1.685054  |
| H | -4.036398 | 3.423954  | 2.971656  |
| H | -2.456621 | 5.348016  | 2.997278  |
| C | 0.572207  | -0.182906 | 1.592952  |
| H | 0.532761  | 0.903411  | 1.578451  |
| C | 1.802343  | -0.797846 | 1.625405  |
| C | 2.920687  | -0.067802 | 2.320415  |
| F | 2.751256  | -0.142179 | 3.649265  |
| F | 4.131293  | -0.573548 | 2.071631  |
| F | 2.963595  | 1.229008  | 2.009789  |
| O | -0.827850 | -2.107180 | 1.660263  |
| C | -0.612166 | -0.953440 | 1.332512  |
| H | -4.036461 | 1.709510  | -0.763276 |
| C | -6.120522 | -0.729457 | -1.169762 |
| H | -6.178998 | 0.175779  | -1.772939 |
| H | -8.125318 | -1.354679 | -1.604351 |
| H | 1.874382  | -1.889575 | 1.672942  |
| C | -0.242708 | -2.783257 | -1.364705 |
| H | -0.032121 | -3.007530 | -2.419615 |

|   |           |           |           |
|---|-----------|-----------|-----------|
| H | -0.575965 | -3.684097 | -0.840821 |
| H | -1.026910 | -2.014488 | -1.323726 |
| C | 1.461664  | -1.186025 | -1.113239 |
| O | 0.930320  | -2.346323 | -0.702382 |
| O | 0.911754  | -0.487625 | -1.939784 |
| C | 3.672131  | -1.993849 | -0.201547 |
| O | 3.461573  | -3.128096 | 0.205598  |
| C | 2.711678  | -0.900365 | -0.406589 |
| N | 3.460447  | 0.253578  | -0.848592 |
| C | 4.828052  | -0.084782 | -0.933910 |
| C | 5.964313  | 0.667145  | -1.267330 |
| C | 4.988209  | -1.428424 | -0.559826 |
| C | 7.206553  | 0.031008  | -1.242995 |
| H | 5.925671  | 1.713931  | -1.546925 |
| C | 6.230930  | -2.052555 | -0.528627 |
| C | 7.355394  | -1.314609 | -0.883994 |
| H | 8.088742  | 0.612877  | -1.515077 |
| H | 6.296554  | -3.099038 | -0.225194 |
| H | 8.345705  | -1.770617 | -0.877475 |
| C | 2.879068  | 1.507292  | -0.943166 |
| O | 1.765383  | 1.713352  | -0.501955 |
| C | 3.652831  | 2.608724  | -1.623152 |
| H | 4.411572  | 3.017798  | -0.941532 |
| H | 4.145228  | 2.263581  | -2.539647 |
| H | 2.938648  | 3.403703  | -1.860134 |

-----  
 PCMOpt/19\_TS\_SRh

Frequencies, energies and thermodynamic properties:

|                                                  |                  |
|--------------------------------------------------|------------------|
| Lowest Vibrational Mode (1/cm) =                 | -180.2417        |
| 2nd Lowest Vibrational Mode (1/cm) =             | 18.2828          |
| E(RM062X) (a.u.) =                               | -2588.51789150   |
| Thermal correction to Enthalpy (a.u.) =          | 0.663338         |
| Thermal correction to Gibbs Free Energy (a.u.) = | 0.547881         |
| Total Entropy (cal/Kmol) =                       | 243.001          |
| Esp(RM062X+D3) (a.u.) =                          | -2591.12561372   |
| Esp(D3) (a.u.) =                                 | -0.0107053218    |
| Esp(RM062X) (a.u.) =                             | -2591.1149083982 |

Optimised cartesian coordinates (Angstrom):

C 6.509478 -2.767904 -0.366619  
C 5.911262 -3.928990 -0.878150  
C 4.541616 -3.982359 -1.113620  
C 3.784429 -2.847917 -0.821086  
C 4.381553 -1.697660 -0.304090  
H 6.527269 -4.800999 -1.098093  
H 4.071732 -4.880133 -1.515630  
C 2.190597 -1.003519 -0.424916  
C 1.392690 1.227895 0.225879  
C 2.592000 1.196480 1.188171  
C 3.807159 0.612538 0.493188  
H 4.615337 0.438198 1.214332  
S 2.058004 -2.632782 -1.028729  
N 3.442839 -0.683875 -0.080315  
N 1.168552 -0.130877 -0.326236  
C 2.879126 2.557319 1.864475  
C 3.839110 3.462112 1.084514  
C 3.414691 2.337429 3.280727  
H 1.909650 3.075765 1.953284  
H 4.861838 3.054097 1.101730  
H 3.542696 3.605340 0.036538  
H 3.877391 4.451441 1.561353  
H 2.691026 1.797221 3.906849  
H 4.350971 1.757749 3.263420  
H 3.629434 3.300900 3.763568  
H 2.306218 0.485770 1.979713  
H 0.513041 1.444266 0.848208  
C 1.497942 2.265769 -0.871833  
C 0.897217 3.515366 -0.684104  
C 2.223795 2.024902 -2.042273  
C 1.052134 4.523125 -1.633841  
H 0.302339 3.700258 0.214599  
C 2.379125 3.033619 -2.993735  
H 2.669682 1.044637 -2.229570  
C 1.801564 4.286288 -2.787238  
H 0.581609 5.494209 -1.475127

|   |           |           |           |
|---|-----------|-----------|-----------|
| H | 2.950838  | 2.836322  | -3.901354 |
| H | 1.923651  | 5.073894  | -3.531864 |
| C | -1.136972 | 0.521358  | -0.870445 |
| H | -0.908714 | 1.551422  | -0.616543 |
| C | -2.406279 | 0.191008  | -1.250467 |
| C | -3.318571 | 1.282085  | -1.730111 |
| F | -3.092388 | 1.517341  | -3.034535 |
| F | -4.611806 | 0.978167  | -1.626484 |
| F | -3.113467 | 2.435346  | -1.092845 |
| O | -0.291042 | -1.673664 | -1.152121 |
| C | -0.135611 | -0.514151 | -0.806186 |
| H | 4.188213  | 1.261722  | -0.309307 |
| C | 5.757229  | -1.635669 | -0.073092 |
| H | 6.232570  | -0.734967 | 0.313109  |
| H | 7.586124  | -2.747123 | -0.197194 |
| H | -2.623504 | -0.801300 | -1.645207 |
| C | -5.414061 | -2.723877 | -1.709671 |
| H | -6.197627 | -2.066905 | -2.109788 |
| H | -4.946882 | -3.291842 | -2.520076 |
| H | -5.862365 | -3.409213 | -0.976915 |
| C | -4.747173 | -1.224088 | -0.041506 |
| O | -4.382698 | -1.965828 | -1.102366 |
| O | -5.907456 | -1.051324 | 0.247310  |
| C | -3.679239 | 0.684324  | 1.315291  |
| O | -4.538919 | 1.565174  | 1.263997  |
| C | -3.609016 | -0.592540 | 0.647606  |
| N | -2.476673 | -1.327115 | 1.124072  |
| C | -1.700531 | -0.452170 | 1.907327  |
| C | -0.477793 | -0.629833 | 2.577763  |
| C | -2.389274 | 0.768844  | 2.034739  |
| C | 0.010367  | 0.429990  | 3.340404  |
| H | 0.098995  | -1.548777 | 2.528951  |
| C | -1.867247 | 1.833628  | 2.766829  |
| C | -0.653573 | 1.664089  | 3.426699  |
| H | 0.944070  | 0.283660  | 3.886784  |
| H | -2.430560 | 2.767071  | 2.825113  |
| H | -0.225287 | 2.471863  | 4.021832  |

C -2.484552 -2.721161 1.209583  
O -3.503423 -3.345341 1.006081  
C -1.187342 -3.414088 1.535170  
H -0.352409 -2.983881 0.968232  
H -0.974142 -3.346183 2.610915  
H -1.312157 -4.470169 1.274429

-----  
PCMopt/19\_TS\_SRi

Frequencies, energies and thermodynamic properties:

Lowest Vibrational Mode (1/cm) = -214.4343  
2nd Lowest Vibrational Mode (1/cm) = 16.8470  
E(RM062X) (a.u.) = -2588.51788505  
Thermal correction to Enthalpy (a.u.) = 0.663196  
Thermal correction to Gibbs Free Energy (a.u.) = 0.548366  
Total Entropy (cal/Kmol) = 241.681  
Esp(RM062X+D3) (a.u.) = -2591.12498671  
Esp(D3) (a.u.) = -0.0106449861  
Esp(RM062X) (a.u.) = -2591.1143417239

Optimised cartesian coordinates (Angstrom):

C 6.660499 -2.555774 -0.440238  
C 6.114206 -3.716907 -1.006281  
C 4.748864 -3.817005 -1.252847  
C 3.942799 -2.729595 -0.916071  
C 4.488685 -1.579876 -0.344033  
H 6.767400 -4.551701 -1.260646  
H 4.319549 -4.715220 -1.697173  
C 2.271100 -0.970304 -0.451827  
C 1.383699 1.200026 0.273199  
C 2.570439 1.176407 1.251805  
C 3.815510 0.665847 0.551773  
H 4.619516 0.490454 1.277488  
S 2.208897 -2.577307 -1.125467  
N 3.507749 -0.616539 -0.082215  
N 1.216026 -0.144497 -0.329444  
C 2.799216 2.519855 1.983210  
C 3.735108 3.488598 1.252102  
C 3.326047 2.265416 3.396993

|   |           |           |           |
|---|-----------|-----------|-----------|
| H | 1.810420  | 2.999198  | 2.078635  |
| H | 4.772211  | 3.118610  | 1.269923  |
| H | 3.448425  | 3.660040  | 0.205711  |
| H | 3.729255  | 4.460009  | 1.765900  |
| H | 2.616213  | 1.674926  | 3.992655  |
| H | 4.283568  | 1.721895  | 3.369517  |
| H | 3.499014  | 3.216744  | 3.919113  |
| H | 2.301474  | 0.425859  | 2.012242  |
| H | 0.487269  | 1.363323  | 0.887445  |
| C | 1.468353  | 2.280278  | -0.785004 |
| C | 0.823611  | 3.501879  | -0.562147 |
| C | 2.216578  | 2.105511  | -1.953016 |
| C | 0.956094  | 4.547103  | -1.474046 |
| H | 0.211677  | 3.635282  | 0.334206  |
| C | 2.349523  | 3.151679  | -2.866694 |
| H | 2.697134  | 1.147540  | -2.167857 |
| C | 1.727223  | 4.376269  | -2.624812 |
| H | 0.451056  | 5.495773  | -1.288011 |
| H | 2.938732  | 3.005715  | -3.772847 |
| H | 1.831684  | 5.193184  | -3.339969 |
| C | -1.100423 | 0.438077  | -0.885468 |
| H | -0.902843 | 1.469573  | -0.613838 |
| C | -2.369696 | 0.078798  | -1.268365 |
| C | -3.276181 | 1.167892  | -1.769858 |
| F | -3.018140 | 1.408536  | -3.066418 |
| F | -4.573021 | 0.862826  | -1.699437 |
| F | -3.093931 | 2.320084  | -1.122840 |
| O | -0.178080 | -1.719867 | -1.211363 |
| C | -0.073158 | -0.561437 | -0.836615 |
| H | 4.183034  | 1.362877  | -0.216114 |
| C | 5.859264  | -1.470481 | -0.101535 |
| H | 6.293867  | -0.568286 | 0.327065  |
| H | 7.734548  | -2.497152 | -0.263289 |
| H | -2.550372 | -0.904379 | -1.707078 |
| C | -6.836428 | -1.431861 | -0.838563 |
| H | -6.913672 | -2.526114 | -0.886875 |
| H | -7.760593 | -1.004724 | -0.437667 |

H -6.645450 -1.045705 -1.849342  
 C -4.563372 -1.408664 -0.310920  
 O -5.797150 -1.037186 0.043525  
 O -4.353753 -2.135030 -1.257629  
 C -3.671568 0.505451 1.229488  
 O -4.546595 1.364920 1.169901  
 C -3.533347 -0.752571 0.514357  
 N -2.405138 -1.468248 1.025773  
 C -1.682556 -0.591727 1.855822  
 C -0.473788 -0.751736 2.555045  
 C -2.410703 0.603434 1.997012  
 C -0.038260 0.301748 3.357035  
 H 0.131983 -1.651067 2.495376  
 C -1.942564 1.663327 2.771237  
 C -0.741585 1.512596 3.458374  
 H 0.886444 0.170056 3.922089  
 H -2.534869 2.578029 2.837745  
 H -0.352865 2.316826 4.084500  
 C -2.381557 -2.866317 1.105860  
 O -3.386404 -3.511916 0.913798  
 C -1.063432 -3.527364 1.414960  
 H -0.239046 -3.051337 0.870403  
 H -0.861750 -3.492645 2.494606  
 H -1.153323 -4.577495 1.117559

-----

PCMopt/19\_TS\_SRj

Frequencies, energies and thermodynamic properties:

Lowest Vibrational Mode (1/cm) = -230.8483  
 2nd Lowest Vibrational Mode (1/cm) = 18.2208  
 E(RM062X) (a.u.) = -2588.51817207  
 Thermal correction to Enthalpy (a.u.) = 0.663292  
 Thermal correction to Gibbs Free Energy (a.u.) = 0.547382  
 Total Entropy (cal/Kmol) = 243.953  
 Esp(RM062X+D3) (a.u.) = -2591.12206671  
 Esp(D3) (a.u.) = -0.0099703197  
 Esp(RM062X) (a.u.) = -2591.1120963903

Optimised cartesian coordinates (Angstrom):

C -6.595558 2.925425 0.174007  
C -6.086262 3.965796 -0.615320  
C -4.786625 3.914960 -1.111572  
C -4.010056 2.799787 -0.800747  
C -4.518279 1.769712 -0.007319  
H -6.715317 4.825403 -0.847110  
H -4.385955 4.720480 -1.727467  
C -2.411378 0.947952 -0.444305  
C -1.572446 -1.215252 0.330565  
C -2.499284 -0.957588 1.530335  
C -3.828954 -0.400780 1.052177  
H -4.431071 -0.050425 1.900658  
S -2.349690 2.482204 -1.274973  
N -3.577324 0.753270 0.188778  
N -1.436402 0.035363 -0.447896  
C -2.658500 -2.176867 2.467043  
C -3.814454 -3.112417 2.099608  
C -2.805027 -1.707727 3.915930  
H -1.719501 -2.750688 2.398014  
H -4.785984 -2.630502 2.291117  
H -3.788975 -3.431999 1.048417  
H -3.771013 -4.014003 2.726642  
H -1.931187 -1.123791 4.237239  
H -3.700362 -1.077522 4.036266  
H -2.911352 -2.568075 4.591586  
H -1.993985 -0.161548 2.101849  
H -0.572945 -1.393783 0.749686  
C -1.982769 -2.374699 -0.552764  
C -1.395955 -3.628232 -0.349935  
C -2.968999 -2.238373 -1.535937  
C -1.813357 -4.735664 -1.086290  
H -0.602045 -3.737173 0.392090  
C -3.387671 -3.345152 -2.274624  
H -3.416104 -1.262501 -1.741137  
C -2.817468 -4.597617 -2.045193  
H -1.348454 -5.707287 -0.914374  
H -4.160307 -3.226038 -3.035310



H -3.145886 -5.462463 -2.623133  
C 0.781588 -0.722329 -1.177769  
H 0.509183 -1.758138 -0.994264  
C 2.102496 -0.373057 -1.362723  
C 3.051682 -1.390632 -1.944578  
F 2.501398 -1.977558 -3.023257  
F 4.175674 -0.815788 -2.373244  
F 3.376478 -2.385059 -1.117989  
O 0.003351 1.490277 -1.463529  
C -0.164125 0.345975 -1.065959  
H -4.415826 -1.144490 0.492391  
C -5.821398 1.812790 0.489977  
H -6.226431 1.003215 1.096082  
H -7.618169 2.983364 0.547351  
H 2.325965 0.644249 -1.694098  
C 2.165610 -3.188485 2.049550  
H 2.370446 -2.986511 3.108916  
H 1.191710 -3.675785 1.942300  
H 2.957728 -3.839072 1.654080  
C 3.190319 -1.205393 1.380081  
O 2.099499 -1.980888 1.307778  
O 4.147230 -1.500808 2.055079  
C 1.888168 0.893385 1.000858  
O 0.758635 0.527372 1.326713  
C 3.015925 0.052732 0.618702  
N 4.151601 0.912330 0.445515  
C 3.721560 2.250463 0.498306  
C 4.385295 3.461055 0.237465  
C 2.355737 2.276567 0.828586  
C 3.663550 4.645872 0.363135  
H 5.427218 3.513702 -0.059635  
C 1.641871 3.467931 0.950160  
C 2.306013 4.665540 0.720788  
H 4.178789 5.588154 0.169699  
H 0.581069 3.433399 1.204688  
H 1.780198 5.617166 0.803360  
C 5.422730 0.414515 0.153261

|   |          |           |           |
|---|----------|-----------|-----------|
| O | 5.578104 | -0.749670 | -0.129538 |
| C | 6.593640 | 1.363117  | 0.240034  |
| H | 6.670721 | 1.961768  | -0.678141 |
| H | 6.521112 | 2.038182  | 1.100731  |
| H | 7.494425 | 0.746245  | 0.321465  |

-----  
PCMopt/19\_TS\_SRk

Frequencies, energies and thermodynamic properties:

|                                                  |                  |
|--------------------------------------------------|------------------|
| Lowest Vibrational Mode (1/cm) =                 | -353.7918        |
| 2nd Lowest Vibrational Mode (1/cm) =             | 14.9061          |
| E(RM062X) (a.u.) =                               | -2588.51374822   |
| Thermal correction to Enthalpy (a.u.) =          | 0.662788         |
| Thermal correction to Gibbs Free Energy (a.u.) = | 0.546332         |
| Total Entropy (cal/Kmol) =                       | 245.103          |
| Esp(RM062X+D3) (a.u.) =                          | -2591.11503253   |
| Esp(D3) (a.u.) =                                 | -0.0098978069    |
| Esp(RM062X) (a.u.) =                             | -2591.1051347231 |

Optimised cartesian coordinates (Angstrom):

|   |          |           |           |
|---|----------|-----------|-----------|
| C | 7.035033 | -2.294932 | 0.227435  |
| C | 6.684254 | -3.380577 | -0.585932 |
| C | 5.392368 | -3.506625 | -1.090344 |
| C | 4.462152 | -2.521395 | -0.764501 |
| C | 4.813183 | -1.445861 | 0.054247  |
| H | 7.431159 | -4.135958 | -0.830639 |
| H | 5.114779 | -4.349068 | -1.724302 |
| C | 2.613294 | -0.922275 | -0.386492 |
| C | 1.480212 | 1.093700  | 0.398278  |
| C | 2.407335 | 0.938292  | 1.614962  |
| C | 3.811050 | 0.575897  | 1.160974  |
| H | 4.435038 | 0.285636  | 2.016734  |
| S | 2.772118 | -2.440313 | -1.236720 |
| N | 3.735936 | -0.578566 | 0.264150  |
| N | 1.525666 | -0.154701 | -0.397119 |
| C | 2.372531 | 2.147953  | 2.576246  |
| C | 3.394393 | 3.243184  | 2.256064  |
| C | 2.547595 | 1.675673  | 4.020962  |
| H | 1.363518 | 2.584354  | 2.488941  |

|   |           |           |           |
|---|-----------|-----------|-----------|
| H | 4.419640  | 2.896324  | 2.460131  |
| H | 3.346000  | 3.580705  | 1.211327  |
| H | 3.213098  | 4.115025  | 2.900410  |
| H | 1.757611  | 0.967570  | 4.308139  |
| H | 3.520007  | 1.176186  | 4.156747  |
| H | 2.513069  | 2.528598  | 4.713475  |
| H | 2.003100  | 0.069765  | 2.160823  |
| H | 0.456206  | 1.143118  | 0.791612  |
| C | 1.746956  | 2.319648  | -0.447064 |
| C | 0.955933  | 3.456179  | -0.239617 |
| C | 2.778518  | 2.366991  | -1.390369 |
| C | 1.222787  | 4.636575  | -0.931815 |
| H | 0.117167  | 3.398113  | 0.459867  |
| C | 3.043785  | 3.547794  | -2.084932 |
| H | 3.380584  | 1.478499  | -1.598336 |
| C | 2.273963  | 4.687356  | -1.848932 |
| H | 0.602900  | 5.517955  | -0.760438 |
| H | 3.853344  | 3.575596  | -2.815630 |
| H | 2.483686  | 5.610226  | -2.391550 |
| C | -0.700231 | 0.341391  | -1.247590 |
| H | -0.473055 | 1.401376  | -1.174375 |
| C | -2.038042 | -0.064025 | -1.320198 |
| C | -2.943469 | 0.802368  | -2.163079 |
| F | -2.752841 | 0.494262  | -3.456541 |
| F | -4.244687 | 0.644261  | -1.933631 |
| F | -2.664740 | 2.106487  | -2.042457 |
| O | 0.253656  | -1.828583 | -1.314871 |
| C | 0.298783  | -0.638402 | -1.025209 |
| H | 4.306329  | 1.406182  | 0.635430  |
| C | 6.106542  | -1.312192 | 0.559927  |
| H | 6.387139  | -0.465340 | 1.185309  |
| H | 8.053640  | -2.212677 | 0.607178  |
| H | -2.231067 | -1.124407 | -1.517137 |
| C | -3.646845 | 3.503234  | 0.469520  |
| H | -2.791406 | 3.843414  | -0.129743 |
| H | -4.576223 | 3.923117  | 0.073580  |
| H | -3.503041 | 3.815147  | 1.512274  |

|   |           |           |           |
|---|-----------|-----------|-----------|
| C | -2.749338 | 1.374629  | 0.825177  |
| O | -3.780574 | 2.093313  | 0.383175  |
| O | -1.740192 | 1.885198  | 1.264023  |
| C | -1.864997 | -1.022742 | 1.085104  |
| O | -0.717384 | -0.795468 | 1.435733  |
| C | -2.865850 | -0.073221 | 0.569830  |
| N | -4.114306 | -0.775637 | 0.436570  |
| C | -3.810234 | -2.162837 | 0.457654  |
| C | -4.600591 | -3.271018 | 0.132056  |
| C | -2.483202 | -2.348447 | 0.872960  |
| C | -4.030177 | -4.537464 | 0.258423  |
| H | -5.620536 | -3.174982 | -0.230620 |
| C | -1.918600 | -3.616768 | 0.989592  |
| C | -2.705988 | -4.721320 | 0.684261  |
| H | -4.634597 | -5.408957 | 0.002086  |
| H | -0.877063 | -3.717070 | 1.299798  |
| H | -2.296589 | -5.729155 | 0.757842  |
| C | -5.284571 | -0.316914 | 1.087169  |
| O | -5.236544 | 0.549555  | 1.923563  |
| C | -6.580530 | -0.964862 | 0.673114  |
| H | -6.601055 | -1.175155 | -0.402339 |
| H | -6.724062 | -1.904947 | 1.224846  |
| H | -7.393574 | -0.282968 | 0.944267  |

-----  
 PCMopt/19\_TS\_SRI

Frequencies, energies and thermodynamic properties:

|                                                  |                  |
|--------------------------------------------------|------------------|
| Lowest Vibrational Mode (1/cm) =                 | -379.5549        |
| 2nd Lowest Vibrational Mode (1/cm) =             | 15.0679          |
| E(RM062X) (a.u.) =                               | -2588.51125158   |
| Thermal correction to Enthalpy (a.u.) =          | 0.662743         |
| Thermal correction to Gibbs Free Energy (a.u.) = | 0.547246         |
| Total Entropy (cal/Kmol) =                       | 243.084          |
| Esp(RM062X+D3) (a.u.) =                          | -2591.11369490   |
| Esp(D3) (a.u.) =                                 | -0.0104725313    |
| Esp(RM062X) (a.u.) =                             | -2591.1032223687 |

Optimised cartesian coordinates (Angstrom):

|   |           |           |           |
|---|-----------|-----------|-----------|
| C | -7.376575 | -0.987858 | -0.475560 |
|---|-----------|-----------|-----------|

|   |           |           |           |
|---|-----------|-----------|-----------|
| C | -7.295446 | -2.257634 | 0.112228  |
| C | -6.077536 | -2.759475 | 0.562513  |
| C | -4.944573 | -1.961211 | 0.412615  |
| C | -5.028104 | -0.700823 | -0.181895 |
| H | -8.196999 | -2.860574 | 0.221624  |
| H | -6.009258 | -3.746115 | 1.021423  |
| C | -2.778539 | -0.775439 | 0.307382  |
| C | -1.218826 | 1.053091  | -0.097426 |
| C | -2.122820 | 1.346645  | -1.305322 |
| C | -3.580582 | 1.222832  | -0.899041 |
| H | -4.233772 | 1.247182  | -1.781090 |
| S | -3.293549 | -2.344906 | 0.870280  |
| N | -3.779583 | -0.071365 | -0.242483 |
| N | -1.540873 | -0.288388 | 0.429185  |
| C | -1.790438 | 2.678788  | -2.015027 |
| C | -2.531889 | 3.896375  | -1.454088 |
| C | -2.060498 | 2.555852  | -3.516329 |
| H | -0.705859 | 2.840070  | -1.880434 |
| H | -3.604926 | 3.846227  | -1.697070 |
| H | -2.429223 | 3.997982  | -0.365086 |
| H | -2.137062 | 4.811790  | -1.916639 |
| H | -1.462377 | 1.753440  | -3.971243 |
| H | -3.122877 | 2.337261  | -3.707604 |
| H | -1.816883 | 3.496563  | -4.029705 |
| H | -1.915105 | 0.528694  | -2.016855 |
| H | -0.200523 | 0.968255  | -0.492141 |
| C | -1.236142 | 2.106214  | 0.990526  |
| C | -0.233162 | 3.082474  | 1.002261  |
| C | -2.251394 | 2.155528  | 1.951660  |
| C | -0.268459 | 4.115850  | 1.937711  |
| H | 0.580412  | 3.026082  | 0.273594  |
| C | -2.285470 | 3.189810  | 2.887174  |
| H | -3.023326 | 1.382521  | 1.985465  |
| C | -1.299465 | 4.176805  | 2.876098  |
| H | 0.516311  | 4.873598  | 1.936648  |
| H | -3.084142 | 3.221073  | 3.629469  |
| H | -1.327518 | 4.985407  | 3.607811  |

|   |           |           |           |
|---|-----------|-----------|-----------|
| C | 0.764389  | -0.494779 | 1.208841  |
| H | 0.850975  | 0.586970  | 1.283908  |
| C | 1.927321  | -1.274802 | 1.226786  |
| C | 3.016654  | -0.775759 | 2.141558  |
| F | 2.607407  | -0.865395 | 3.415769  |
| F | 4.149078  | -1.479370 | 2.073356  |
| F | 3.321088  | 0.507377  | 1.928017  |
| O | -0.732745 | -2.323646 | 1.087454  |
| C | -0.471682 | -1.133140 | 0.937840  |
| H | -3.891530 | 2.024188  | -0.211968 |
| C | -6.246502 | -0.190520 | -0.631781 |
| H | -6.318424 | 0.799248  | -1.081255 |
| H | -8.341732 | -0.612341 | -0.816092 |
| H | 1.811796  | -2.362095 | 1.291611  |
| C | 0.456575  | -3.975968 | -1.492797 |
| H | 0.132726  | -3.759119 | -2.519169 |
| H | 0.716612  | -5.033961 | -1.394097 |
| H | -0.343089 | -3.703245 | -0.790737 |
| C | 1.534846  | -1.922931 | -1.233048 |
| O | 1.640731  | -3.249293 | -1.179165 |
| O | 0.503978  | -1.358023 | -1.543739 |
| C | 4.066617  | -1.836784 | -0.579405 |
| O | 4.361631  | -3.009438 | -0.452447 |
| C | 2.713400  | -1.228945 | -0.712942 |
| N | 2.896249  | 0.170775  | -0.976977 |
| C | 4.243994  | 0.494981  | -0.733116 |
| C | 4.874917  | 1.742982  | -0.717147 |
| C | 4.983291  | -0.677206 | -0.533160 |
| C | 6.251407  | 1.763869  | -0.496570 |
| H | 4.310725  | 2.661906  | -0.857814 |
| C | 6.356379  | -0.644139 | -0.302569 |
| C | 6.995230  | 0.591568  | -0.286176 |
| H | 6.762106  | 2.728285  | -0.476798 |
| H | 6.900202  | -1.576654 | -0.140671 |
| H | 8.068446  | 0.656500  | -0.105319 |
| C | 2.098498  | 1.083864  | -1.693758 |
| O | 2.049802  | 2.239291  | -1.324268 |

C 1.473237 0.679536 -3.006167  
H 1.830412 -0.285906 -3.374156  
H 0.381508 0.637568 -2.911357  
H 1.731361 1.478008 -3.714993

-----  
PCMopt/19\_TS\_SSa

Frequencies, energies and thermodynamic properties:

Lowest Vibrational Mode (1/cm) = -253.6756  
2nd Lowest Vibrational Mode (1/cm) = 16.0096  
E(RM062X) (a.u.) = -2588.53204846  
Thermal correction to Enthalpy (a.u.) = 0.663497  
Thermal correction to Gibbs Free Energy (a.u.) = 0.548149  
Total Entropy (cal/Kmol) = 242.772  
Esp(RM062X+D3) (a.u.) = -2591.13219402  
Esp(D3) (a.u.) = -0.0099864884  
Esp(RM062X) (a.u.) = -2591.1222075316

Optimised cartesian coordinates (Angstrom):

C 7.370495 -1.539124 0.619747  
C 7.220747 -2.704845 -0.143988  
C 5.996262 -3.027208 -0.722408  
C 4.927352 -2.155643 -0.520358  
C 5.077869 -0.999654 0.248602  
H 8.073713 -3.367590 -0.290793  
H 5.874407 -3.931752 -1.318699  
C 2.869143 -0.796396 -0.366530  
C 1.430907 1.092983 0.221601  
C 2.277215 1.117284 1.503625  
C 3.745571 0.925681 1.164543  
H 4.340227 0.762229 2.073074  
S 3.281513 -2.321064 -1.107924  
N 3.886137 -0.271459 0.331817  
N 1.691860 -0.179019 -0.492601  
C 2.011369 2.353686 2.391600  
C 2.906491 3.558209 2.085738  
C 2.129429 1.973488 3.868831  
H 0.964575 2.647212 2.206368  
H 3.948408 3.359329 2.382340

|   |           |           |           |
|---|-----------|-----------|-----------|
| H | 2.897659  | 3.837393  | 1.022791  |
| H | 2.564881  | 4.427523  | 2.665133  |
| H | 1.413129  | 1.183599  | 4.135569  |
| H | 3.142436  | 1.608725  | 4.101715  |
| H | 1.934512  | 2.845010  | 4.509696  |
| H | 1.948818  | 0.227907  | 2.066373  |
| H | 0.383164  | 1.031666  | 0.544488  |
| C | 1.606251  | 2.295779  | -0.678822 |
| C | 0.669843  | 3.333068  | -0.590681 |
| C | 2.689723  | 2.424373  | -1.554299 |
| C | 0.841044  | 4.501204  | -1.332416 |
| H | -0.202533 | 3.204472  | 0.055650  |
| C | 2.858749  | 3.592236  | -2.298783 |
| H | 3.409354  | 1.609507  | -1.669477 |
| C | 1.941110  | 4.636852  | -2.180643 |
| H | 0.108386  | 5.305815  | -1.254055 |
| H | 3.709218  | 3.684298  | -2.975743 |
| H | 2.075576  | 5.550276  | -2.761788 |
| C | -0.550944 | -0.032981 | -1.439996 |
| H | -0.506851 | 1.051216  | -1.386823 |
| C | -1.772597 | -0.669675 | -1.539741 |
| C | -2.872101 | 0.022077  | -2.295628 |
| F | -2.640470 | -0.054705 | -3.612704 |
| F | -4.077670 | -0.524921 | -2.096513 |
| F | -2.969079 | 1.319168  | -1.995117 |
| O | 0.720392  | -2.033570 | -1.412303 |
| C | 0.590702  | -0.846310 | -1.152358 |
| H | 4.164458  | 1.787857  | 0.624323  |
| C | 6.303805  | -0.669676 | 0.827908  |
| H | 6.429680  | 0.239781  | 1.414453  |
| H | 8.340182  | -1.303523 | 1.058716  |
| H | -1.767113 | -1.747474 | -1.707464 |
| C | -0.894122 | -3.390777 | 2.322498  |
| H | -0.510434 | -2.834541 | 3.187669  |
| H | -1.348273 | -4.331637 | 2.646361  |
| H | -0.065278 | -3.584135 | 1.627795  |
| C | -1.558907 | -1.467590 | 1.163738  |



O -1.922441 -2.655264 1.671260  
 O -0.438141 -1.022807 1.302114  
 C -2.699824 0.680343 0.724571  
 O -1.765105 1.465142 0.822467  
 C -2.627780 -0.767726 0.437835  
 N -3.973290 -1.281351 0.520679  
 C -4.855140 -0.219034 0.792776  
 C -6.251303 -0.204850 0.922650  
 C -4.131123 0.978006 0.891566  
 C -6.865113 1.024835 1.157955  
 H -6.830908 -1.119141 0.853688  
 C -4.755291 2.201373 1.129532  
 C -6.138869 2.221564 1.263647  
 H -7.950647 1.050839 1.269407  
 H -4.155162 3.110017 1.203009  
 H -6.662575 3.159315 1.451619  
 C -4.420902 -2.529037 0.107798  
 O -5.563183 -2.877961 0.328392  
 C -3.502967 -3.406355 -0.710102  
 H -2.442034 -3.310226 -0.474188  
 H -3.820811 -4.444292 -0.562909  
 H -3.667100 -3.147000 -1.767281

-----

PCMopt/19\_TS\_SSb

Frequencies, energies and thermodynamic properties:

Lowest Vibrational Mode (1/cm) = -222.2279  
 2nd Lowest Vibrational Mode (1/cm) = 16.9156  
 E(RM062X) (a.u.) = -2588.53131604  
 Thermal correction to Enthalpy (a.u.) = 0.663372  
 Thermal correction to Gibbs Free Energy (a.u.) = 0.548402  
 Total Entropy (cal/Kmol) = 241.974  
 Esp(RM062X+D3) (a.u.) = -2591.13230647  
 Esp(D3) (a.u.) = -0.0100796504  
 Esp(RM062X) (a.u.) = -2591.1222268196

Optimised cartesian coordinates (Angstrom):

C -7.421578 -1.446553 -0.538786  
 C -7.240042 -2.690626 0.081648

|   |           |           |           |
|---|-----------|-----------|-----------|
| C | -5.988757 | -3.079107 | 0.550708  |
| C | -4.924509 | -2.194031 | 0.383916  |
| C | -5.107100 | -0.959739 | -0.242561 |
| H | -8.089760 | -3.362710 | 0.202262  |
| H | -5.842185 | -4.043992 | 1.036438  |
| C | -2.865233 | -0.835699 | 0.261487  |
| C | -1.423090 | 1.088278  | -0.232264 |
| C | -2.378788 | 1.286339  | -1.421004 |
| C | -3.816503 | 1.066622  | -0.983255 |
| H | -4.486009 | 1.035294  | -1.852543 |
| S | -3.252468 | -2.426407 | 0.861603  |
| N | -3.914179 | -0.230808 | -0.310680 |
| N | -1.667188 | -0.246262 | 0.369228  |
| C | -2.169408 | 2.624713  | -2.167156 |
| C | -3.006891 | 3.789576  | -1.630115 |
| C | -2.436343 | 2.436802  | -3.662004 |
| H | -1.104154 | 2.883225  | -2.048864 |
| H | -4.075617 | 3.639390  | -1.849630 |
| H | -2.894064 | 3.936199  | -0.547040 |
| H | -2.701813 | 4.720060  | -2.129197 |
| H | -1.768835 | 1.679205  | -4.096022 |
| H | -3.475978 | 2.118859  | -3.839380 |
| H | -2.281671 | 3.381080  | -4.202652 |
| H | -2.133472 | 0.480461  | -2.131544 |
| H | -0.402886 | 1.035593  | -0.640477 |
| C | -1.483627 | 2.195480  | 0.797638  |
| C | -0.531535 | 3.219432  | 0.727493  |
| C | -2.480780 | 2.251455  | 1.776133  |
| C | -0.605220 | 4.308999  | 1.593533  |
| H | 0.277852  | 3.141453  | -0.003602 |
| C | -2.552623 | 3.341453  | 2.644588  |
| H | -3.207171 | 1.440448  | 1.875782  |
| C | -1.622660 | 4.376957  | 2.546970  |
| H | 0.138651  | 5.104406  | 1.529390  |
| H | -3.336723 | 3.378948  | 3.402014  |
| H | -1.681264 | 5.229200  | 3.225407  |
| C | 0.584644  | -0.171971 | 1.311993  |

|   |           |           |           |
|---|-----------|-----------|-----------|
| H | 0.552654  | 0.912514  | 1.309646  |
| C | 1.794071  | -0.819288 | 1.435858  |
| C | 2.875273  | -0.113676 | 2.206704  |
| F | 2.620940  | -0.184346 | 3.520175  |
| F | 4.091624  | -0.642436 | 2.034048  |
| F | 2.958085  | 1.182839  | 1.898284  |
| O | -0.695466 | -2.159208 | 1.152938  |
| C | -0.564238 | -0.956704 | 0.978151  |
| H | -4.170698 | 1.851509  | -0.298567 |
| C | -6.360779 | -0.562651 | -0.710031 |
| H | -6.511995 | 0.406920  | -1.183235 |
| H | -8.412266 | -1.160528 | -0.892544 |
| H | 1.797207  | -1.902065 | 1.569263  |
| C | -0.396431 | -2.127221 | -2.024665 |
| H | -0.702487 | -2.889434 | -1.292741 |
| H | -1.251103 | -1.494846 | -2.287540 |
| H | -0.002169 | -2.616385 | -2.923095 |
| C | 1.795569  | -1.809172 | -1.273570 |
| O | 0.578686  | -1.269770 | -1.444644 |
| O | 2.066390  | -2.922976 | -1.672725 |
| C | 2.678679  | 0.530873  | -0.865475 |
| O | 1.691801  | 1.249137  | -0.985391 |
| C | 2.722695  | -0.911701 | -0.568110 |
| N | 4.107649  | -1.309767 | -0.603961 |
| C | 4.905435  | -0.180621 | -0.858540 |
| C | 6.298935  | -0.047441 | -0.942829 |
| C | 4.085116  | 0.948816  | -0.988715 |
| C | 6.812622  | 1.229475  | -1.165854 |
| H | 6.951840  | -0.908821 | -0.850943 |
| C | 4.609544  | 2.220209  | -1.214153 |
| C | 5.990062  | 2.358927  | -1.302956 |
| H | 7.894989  | 1.348269  | -1.242465 |
| H | 3.936193  | 3.073523  | -1.312736 |
| H | 6.437374  | 3.337568  | -1.479727 |
| C | 4.647154  | -2.516455 | -0.174150 |
| O | 5.813158  | -2.778369 | -0.393459 |
| C | 3.801367  | -3.442841 | 0.666033  |

H 3.904008 -3.117363 1.712192  
H 2.746327 -3.468197 0.389708  
H 4.228167 -4.447889 0.578447

-----

PCMopt/19\_TS\_SSc

Frequencies, energies and thermodynamic properties:

Lowest Vibrational Mode (1/cm) = -265.5046  
2nd Lowest Vibrational Mode (1/cm) = 15.7552  
E(RM062X) (a.u.) = -2588.53099944  
Thermal correction to Enthalpy (a.u.) = 0.663434  
Thermal correction to Gibbs Free Energy (a.u.) = 0.547978  
Total Entropy (cal/Kmol) = 242.998  
Esp(RM062X+D3) (a.u.) = -2591.13165693  
Esp(D3) (a.u.) = -0.0098745286  
Esp(RM062X) (a.u.) = -2591.1217824014

Optimised cartesian coordinates (Angstrom):

C 7.391823 -1.496497 0.610227  
C 7.253849 -2.664138 -0.152639  
C 6.032103 -2.999887 -0.729522  
C 4.953945 -2.139976 -0.527040  
C 5.092893 -0.982113 0.241302  
H 8.113698 -3.317817 -0.300011  
H 5.919391 -3.906157 -1.325027  
C 2.880920 -0.802293 -0.371609  
C 1.427346 1.073227 0.213969  
C 2.271125 1.106255 1.497310  
C 3.741633 0.927295 1.160990  
H 4.335975 0.766963 2.070373  
S 3.308867 -2.323741 -1.112345  
N 3.893678 -0.266818 0.326099  
N 1.698006 -0.197965 -0.497043  
C 1.991865 2.340734 2.383718  
C 2.876915 3.553092 2.079573  
C 2.109126 1.962607 3.861554  
H 0.942913 2.624242 2.195077  
H 3.919794 3.363884 2.379192  
H 2.868503 3.831198 1.016320

|   |           |           |           |
|---|-----------|-----------|-----------|
| H | 2.525885  | 4.419844  | 2.657238  |
| H | 1.398977  | 1.166596  | 4.126624  |
| H | 3.124604  | 1.606692  | 4.097473  |
| H | 1.904816  | 2.832682  | 4.501520  |
| H | 1.948853  | 0.214365  | 2.059553  |
| H | 0.379798  | 1.006038  | 0.535914  |
| C | 1.596026  | 2.275689  | -0.688404 |
| C | 0.651577  | 3.306137  | -0.604347 |
| C | 2.680736  | 2.411258  | -1.561361 |
| C | 0.816043  | 4.474296  | -1.347656 |
| H | -0.221219 | 3.171117  | 0.040156  |
| C | 2.842923  | 3.579110  | -2.307447 |
| H | 3.406945  | 1.601767  | -1.673062 |
| C | 1.917158  | 4.616992  | -2.193401 |
| H | 0.077243  | 5.273625  | -1.272476 |
| H | 3.694469  | 3.676477  | -2.982342 |
| H | 2.046265  | 5.530502  | -2.775663 |
| C | -0.550666 | -0.080437 | -1.432161 |
| H | -0.502460 | 1.005130  | -1.401037 |
| C | -1.781029 | -0.707160 | -1.498782 |
| C | -2.866098 | -0.000534 | -2.262628 |
| F | -2.642433 | -0.111028 | -3.579894 |
| F | -4.090799 | -0.497717 | -2.052916 |
| F | -2.920897 | 1.307337  | -1.991201 |
| O | 0.749033  | -2.065478 | -1.413802 |
| C | 0.599594  | -0.881721 | -1.151426 |
| H | 4.154431  | 1.794041  | 0.623353  |
| C | 6.315820  | -0.638610 | 0.819017  |
| H | 6.432287  | 0.272502  | 1.404966  |
| H | 8.359338  | -1.250105 | 1.048087  |
| H | -1.828029 | -1.792773 | -1.604506 |
| C | -0.888815 | -3.408616 | 2.326089  |
| H | -0.456835 | -2.866388 | 3.177837  |
| H | -1.353229 | -4.339066 | 2.665810  |
| H | -0.090464 | -3.623224 | 1.602242  |
| C | -1.542574 | -1.479991 | 1.183637  |
| O | -1.919614 | -2.648048 | 1.713885  |

|   |           |           |           |
|---|-----------|-----------|-----------|
| O | -0.410403 | -1.053715 | 1.297593  |
| C | -2.683284 | 0.684044  | 0.759207  |
| O | -1.752442 | 1.475514  | 0.867358  |
| C | -2.609998 | -0.754242 | 0.482471  |
| N | -3.951764 | -1.279533 | 0.532100  |
| C | -4.847200 | -0.216951 | 0.771968  |
| C | -6.244264 | -0.177816 | 0.890770  |
| C | -4.119922 | 0.980289  | 0.891939  |
| C | -6.851815 | 1.055293  | 1.128451  |
| H | -6.871001 | -1.060094 | 0.823438  |
| C | -4.735118 | 2.207264  | 1.128449  |
| C | -6.119634 | 2.244596  | 1.246249  |
| H | -7.937895 | 1.084083  | 1.230404  |
| H | -4.123132 | 3.106645  | 1.216810  |
| H | -6.636659 | 3.186196  | 1.432409  |
| C | -4.230769 | -2.517742 | -0.040001 |
| O | -3.354019 | -3.157697 | -0.580310 |
| C | -5.641043 | -3.040550 | 0.041150  |
| H | -6.043821 | -2.971181 | 1.058762  |
| H | -6.293955 | -2.476622 | -0.639760 |
| H | -5.617209 | -4.086480 | -0.279644 |

-----  
 PCMopt/19\_TS\_SSd

Frequencies, energies and thermodynamic properties:

|                                                  |                  |
|--------------------------------------------------|------------------|
| Lowest Vibrational Mode (1/cm) =                 | -183.8079        |
| 2nd Lowest Vibrational Mode (1/cm) =             | 19.2791          |
| E(RM062X) (a.u.) =                               | -2588.52852015   |
| Thermal correction to Enthalpy (a.u.) =          | 0.663682         |
| Thermal correction to Gibbs Free Energy (a.u.) = | 0.549269         |
| Total Entropy (cal/Kmol) =                       | 240.802          |
| Esp(RM062X+D3) (a.u.) =                          | -2591.13324369   |
| Esp(D3) (a.u.) =                                 | -0.0109897530    |
| Esp(RM062X) (a.u.) =                             | -2591.1222539370 |

Optimised cartesian coordinates (Angstrom):

|   |          |           |           |
|---|----------|-----------|-----------|
| C | 6.800432 | -1.802600 | -0.512624 |
| C | 6.414949 | -2.944670 | -1.230083 |
| C | 5.083864 | -3.156661 | -1.572971 |

|   |           |           |           |
|---|-----------|-----------|-----------|
| C | 4.147167  | -2.201244 | -1.178138 |
| C | 4.533060  | -1.070218 | -0.457162 |
| H | 7.167870  | -3.675125 | -1.526405 |
| H | 4.778410  | -4.040428 | -2.133486 |
| C | 2.271289  | -0.689492 | -0.643028 |
| C | 1.084190  | 1.234832  | 0.327926  |
| C | 2.236589  | 1.203360  | 1.345645  |
| C | 3.556258  | 0.975340  | 0.632893  |
| H | 4.365415  | 0.820490  | 1.357259  |
| S | 2.420272  | -2.211773 | -1.475638 |
| N | 3.439851  | -0.247742 | -0.163543 |
| N | 1.124930  | 0.002503  | -0.498017 |
| C | 2.255784  | 2.415444  | 2.303106  |
| C | 3.075859  | 3.606389  | 1.797600  |
| C | 2.763778  | 1.979204  | 3.679142  |
| H | 1.207706  | 2.736111  | 2.422876  |
| H | 4.151213  | 3.368626  | 1.798732  |
| H | 2.794372  | 3.923224  | 0.783940  |
| H | 2.932965  | 4.463718  | 2.470246  |
| H | 2.125668  | 1.196265  | 4.113803  |
| H | 3.790274  | 1.585024  | 3.613428  |
| H | 2.779253  | 2.831527  | 4.372754  |
| H | 2.054557  | 0.306441  | 1.956597  |
| H | 0.160172  | 1.170415  | 0.918806  |
| C | 1.034478  | 2.488479  | -0.517134 |
| C | 0.215624  | 3.543235  | -0.096397 |
| C | 1.811276  | 2.638631  | -1.668886 |
| C | 0.202946  | 4.746960  | -0.797806 |
| H | -0.414640 | 3.410629  | 0.788127  |
| C | 1.798108  | 3.844570  | -2.371432 |
| H | 2.426046  | 1.811774  | -2.034124 |
| C | 1.001661  | 4.902248  | -1.932497 |
| H | -0.435906 | 5.564462  | -0.461095 |
| H | 2.409834  | 3.954833  | -3.267725 |
| H | 0.992494  | 5.843855  | -2.483044 |
| C | -1.235707 | 0.368107  | -1.111907 |
| H | -1.161447 | 1.423354  | -0.865925 |

C -2.450197 -0.185209 -1.440645  
C -3.518747 0.730577 -1.983604  
F -3.539756 0.618946 -3.318237  
F -4.759408 0.464326 -1.565583  
F -3.287005 2.017905 -1.708607  
O -0.039974 -1.598142 -1.628397  
C -0.076857 -0.492458 -1.118299  
H 3.832503 1.811199 -0.027325  
C 5.869016 -0.848864 -0.116421  
H 6.179311 0.040347 0.430732  
H 7.850709 -1.654021 -0.261188  
H -2.500185 -1.189084 -1.868392  
C -6.748248 -1.736184 -0.114709  
H -7.104197 -0.720119 -0.336281  
H -7.108489 -2.434560 -0.876296  
H -7.119046 -2.031316 0.875799  
C -4.690778 -1.009297 0.716933  
O -5.332902 -1.786272 -0.164753  
O -5.281592 -0.352637 1.550198  
C -2.605505 -2.366381 0.242205  
O -2.979663 -3.246816 -0.518835  
C -3.238016 -1.071695 0.545470  
N -2.404993 -0.392625 1.499489  
C -1.276745 -1.197724 1.774576  
C -0.177863 -0.977884 2.620341  
C -1.360195 -2.382635 1.036624  
C 0.814209 -1.958162 2.659020  
H -0.102741 -0.079910 3.225305  
C -0.361861 -3.352297 1.076844  
C 0.742334 -3.132037 1.892346  
H 1.672961 -1.803968 3.316342  
H -0.459138 -4.249841 0.463524  
H 1.547087 -3.866043 1.946698  
C -2.407929 0.962562 1.789181  
O -1.523735 1.456471 2.474407  
C -3.520091 1.838058 1.275509  
H -4.103972 1.416814 0.460159



H -4.208576 2.019880 2.112080  
H -3.069700 2.793698 0.979933

-----

PCMopt/19\_TS\_SSe

Frequencies, energies and thermodynamic properties:

Lowest Vibrational Mode (1/cm) = -226.4565  
2nd Lowest Vibrational Mode (1/cm) = 18.0469  
E(RM062X) (a.u.) = -2588.52916214  
Thermal correction to Enthalpy (a.u.) = 0.663205  
Thermal correction to Gibbs Free Energy (a.u.) = 0.548358  
Total Entropy (cal/Kmol) = 241.717  
Esp(RM062X+D3) (a.u.) = -2591.13092601  
Esp(D3) (a.u.) = -0.0099846481  
Esp(RM062X) (a.u.) = -2591.1209413619

Optimised cartesian coordinates (Angstrom):

C -7.430585 -1.411060 -0.533294  
C -7.262475 -2.651857 0.097261  
C -6.016287 -3.047777 0.573879  
C -4.943491 -2.173670 0.404398  
C -5.112747 -0.942694 -0.232348  
H -8.118580 -3.315424 0.219901  
H -5.880143 -4.010220 1.067477  
C -2.871419 -0.834453 0.279226  
C -1.411925 1.071612 -0.224164  
C -2.358971 1.267457 -1.419746  
C -3.801111 1.064179 -0.988501  
H -4.466049 1.028768 -1.861205  
S -3.274995 -2.417658 0.889447  
N -3.913211 -0.225042 -0.302321  
N -1.669245 -0.255753 0.386800  
C -2.131507 2.596998 -2.176129  
C -2.960893 3.774699 -1.654923  
C -2.389964 2.398920 -3.671145  
H -1.064372 2.845152 -2.052243  
H -4.029563 3.633018 -1.880329  
H -2.853888 3.929380 -0.572379  
H -2.643426 4.697925 -2.159781

|   |           |           |           |
|---|-----------|-----------|-----------|
| H | -1.727188 | 1.630806  | -4.093822 |
| H | -3.431500 | 2.089843  | -3.853109 |
| H | -2.221940 | 3.336784  | -4.218987 |
| H | -2.115258 | 0.453245  | -2.121414 |
| H | -0.390564 | 1.008638  | -0.628121 |
| C | -1.468558 | 2.187703  | 0.796351  |
| C | -0.505245 | 3.201111  | 0.724059  |
| C | -2.470966 | 2.261885  | 1.768271  |
| C | -0.572933 | 4.298218  | 1.581060  |
| H | 0.307776  | 3.107358  | -0.001234 |
| C | -2.536651 | 3.359387  | 2.627802  |
| H | -3.206327 | 1.459211  | 1.869718  |
| C | -1.595338 | 4.384362  | 2.527761  |
| H | 0.179597  | 5.085357  | 1.515425  |
| H | -3.324817 | 3.411003  | 3.380189  |
| H | -1.649098 | 5.242489  | 3.199173  |
| C | 0.585514  | -0.197259 | 1.318950  |
| H | 0.545946  | 0.887378  | 1.330788  |
| C | 1.804147  | -0.830620 | 1.414608  |
| C | 2.878725  | -0.100803 | 2.173325  |
| F | 2.645416  | -0.193689 | 3.490965  |
| F | 4.110763  | -0.580509 | 1.981664  |
| F | 2.913963  | 1.203783  | 1.881667  |
| O | -0.717342 | -2.174288 | 1.182586  |
| C | -0.570437 | -0.976223 | 0.996873  |
| H | -4.152726 | 1.859469  | -0.314483 |
| C | -6.361139 | -0.538086 | -0.707372 |
| H | -6.501849 | 0.429164  | -1.188507 |
| H | -8.417368 | -1.118830 | -0.892870 |
| H | 1.868099  | -1.916628 | 1.500187  |
| C | -0.442724 | -2.172266 | -1.986595 |
| H | -0.713316 | -2.951116 | -1.258390 |
| H | -1.319250 | -1.557198 | -2.218225 |
| H | -0.063880 | -2.641986 | -2.902228 |
| C | 1.761054  | -1.827734 | -1.283380 |
| O | 0.528928  | -1.301982 | -1.423561 |
| O | 2.035740  | -2.930831 | -1.698023 |

C 2.659090 0.524353 -0.909293  
 O 1.680895 1.257248 -1.042624  
 C 2.691527 -0.905881 -0.613408  
 N 4.067667 -1.327740 -0.617972  
 C 4.887836 -0.205818 -0.844091  
 C 6.281630 -0.059195 -0.904963  
 C 4.073743 0.928971 -1.003711  
 C 6.800069 1.214951 -1.136665  
 H 6.971257 -0.889066 -0.794805  
 C 4.600814 2.197592 -1.232711  
 C 5.981906 2.341482 -1.300063  
 H 7.883808 1.328615 -1.195201  
 H 3.924911 3.046174 -1.352991  
 H 6.430947 3.318750 -1.479050  
 C 4.426912 -2.529919 -0.011021  
 O 3.609377 -3.184461 0.598114  
 C 5.855030 -2.991140 -0.146373  
 H 6.240392 -2.846342 -1.162332  
 H 6.494075 -2.442585 0.560296  
 H 5.879888 -4.053160 0.117692

-----  
 PCMopt/19\_TS\_SSf

Frequencies, energies and thermodynamic properties:

Lowest Vibrational Mode (1/cm) = -186.6567  
 2nd Lowest Vibrational Mode (1/cm) = 18.0257  
 E(RM062X) (a.u.) = -2588.52622169  
 Thermal correction to Enthalpy (a.u.) = 0.663590  
 Thermal correction to Gibbs Free Energy (a.u.) = 0.548905  
 Total Entropy (cal/Kmol) = 241.374  
 Esp(RM062X+D3) (a.u.) = -2591.13128031  
 Esp(D3) (a.u.) = -0.0109747618  
 Esp(RM062X) (a.u.) = -2591.1203055482

Optimised cartesian coordinates (Angstrom):

C 6.881346 -1.577636 -0.280240  
 C 6.575032 -2.714354 -1.042850  
 C 5.271192 -2.966600 -1.456361  
 C 4.280230 -2.057368 -1.085582

|   |           |           |           |
|---|-----------|-----------|-----------|
| C | 4.587585  | -0.931823 | -0.319620 |
| H | 7.368789  | -3.408622 | -1.318919 |
| H | 5.028055  | -3.846126 | -2.052831 |
| C | 2.324424  | -0.629206 | -0.606689 |
| C | 1.023513  | 1.227325  | 0.346898  |
| C | 2.123630  | 1.211491  | 1.420964  |
| C | 3.484732  | 1.046821  | 0.771750  |
| H | 4.260711  | 0.899462  | 1.533189  |
| S | 2.570716  | -2.123584 | -1.466923 |
| N | 3.451388  | -0.157812 | -0.059889 |
| N | 1.147725  | 0.016516  | -0.501796 |
| C | 2.050251  | 2.399941  | 2.405025  |
| C | 2.849305  | 3.631681  | 1.968294  |
| C | 2.505893  | 1.949009  | 3.794590  |
| H | 0.986218  | 2.679480  | 2.479130  |
| H | 3.931458  | 3.432847  | 2.017456  |
| H | 2.605752  | 3.963077  | 0.949485  |
| H | 2.642057  | 4.466493  | 2.652430  |
| H | 1.877554  | 1.132524  | 4.179059  |
| H | 3.548601  | 1.594665  | 3.770818  |
| H | 2.455065  | 2.784020  | 4.507305  |
| H | 1.944030  | 0.294460  | 2.002076  |
| H | 0.073794  | 1.118693  | 0.888283  |
| C | 0.973209  | 2.497414  | -0.473330 |
| C | 0.094962  | 3.512889  | -0.076455 |
| C | 1.805056  | 2.701074  | -1.577451 |
| C | 0.076047  | 4.730920  | -0.752630 |
| H | -0.577183 | 3.338156  | 0.769151  |
| C | 1.785776  | 3.921288  | -2.254706 |
| H | 2.468757  | 1.905198  | -1.925349 |
| C | 0.928572  | 4.939886  | -1.838476 |
| H | -0.609643 | 5.517454  | -0.434840 |
| H | 2.440699  | 4.073368  | -3.113587 |
| H | 0.914639  | 5.892718  | -2.369256 |
| C | -1.192330 | 0.313070  | -1.216021 |
| H | -1.166747 | 1.362368  | -0.937825 |
| C | -2.373257 | -0.268975 | -1.615773 |

|   |           |           |           |
|---|-----------|-----------|-----------|
| C | -3.439231 | 0.631271  | -2.188648 |
| F | -3.379143 | 0.566382  | -3.525789 |
| F | -4.689276 | 0.310062  | -1.851945 |
| F | -3.266100 | 1.915507  | -1.858575 |
| O | 0.097276  | -1.595577 | -1.725791 |
| C | -0.005502 | -0.505400 | -1.191021 |
| H | 3.765464  | 1.908587  | 0.147651  |
| C | 5.895848  | -0.669678 | 0.091807  |
| H | 6.144862  | 0.216387  | 0.674251  |
| H | 7.911639  | -1.396600 | 0.026467  |
| H | -2.368613 | -1.257894 | -2.079836 |
| C | -6.617766 | -0.676581 | 1.558001  |
| H | -6.985634 | -1.702584 | 1.691120  |
| H | -6.862125 | -0.070970 | 2.436170  |
| H | -7.083844 | -0.249021 | 0.659766  |
| C | -4.693386 | -1.318233 | 0.382567  |
| O | -5.203256 | -0.660806 | 1.442254  |
| O | -5.390734 | -1.950623 | -0.376279 |
| C | -2.540205 | -2.486447 | -0.013237 |
| O | -2.864276 | -3.353622 | -0.810645 |
| C | -3.231738 | -1.224213 | 0.294278  |
| N | -2.468046 | -0.545465 | 1.305400  |
| C | -1.325510 | -1.319092 | 1.609438  |
| C | -0.275042 | -1.085042 | 2.511047  |
| C | -1.333008 | -2.485599 | 0.837187  |
| C | 0.747535  | -2.032135 | 2.571470  |
| H | -0.259855 | -0.201270 | 3.141200  |
| C | -0.304563 | -3.422036 | 0.900336  |
| C | 0.751790  | -3.186971 | 1.772829  |
| H | 1.569626  | -1.867110 | 3.271594  |
| H | -0.340974 | -4.305278 | 0.260209  |
| H | 1.578019  | -3.894926 | 1.846858  |
| C | -2.533138 | 0.800872  | 1.623823  |
| O | -1.699757 | 1.312424  | 2.357494  |
| C | -3.655010 | 1.645958  | 1.077620  |
| H | -4.213293 | 1.204250  | 0.253666  |
| H | -4.357547 | 1.831047  | 1.902119  |

H -3.220059 2.606749 0.775278

-----  
PCMopt/19\_TS\_SSg

Frequencies, energies and thermodynamic properties:

Lowest Vibrational Mode (1/cm) = -153.5861  
2nd Lowest Vibrational Mode (1/cm) = 25.1220  
E(RM062X) (a.u.) = -2588.52212130  
Thermal correction to Enthalpy (a.u.) = 0.663601  
Thermal correction to Gibbs Free Energy (a.u.) = 0.550122  
Total Entropy (cal/Kmol) = 238.836  
Esp(RM062X+D3) (a.u.) = -2591.13030632  
Esp(D3) (a.u.) = -0.0109804810  
Esp(RM062X) (a.u.) = -2591.1193258390

Optimised cartesian coordinates (Angstrom):

C 6.642381 -2.103103 -0.472375  
C 6.196267 -3.197623 -1.228427  
C 4.860417 -3.315029 -1.595788  
C 3.979469 -2.314045 -1.184355  
C 4.424998 -1.232374 -0.423379  
H 6.906258 -3.965254 -1.536469  
H 4.509597 -4.160188 -2.188199  
C 2.195517 -0.705693 -0.623940  
C 1.140306 1.302679 0.327446  
C 2.274858 1.216876 1.361875  
C 3.581510 0.858508 0.680904  
H 4.353759 0.635601 1.427397  
S 2.263868 -2.197183 -1.517034  
N 3.381306 -0.351416 -0.118518  
N 1.087719 0.048464 -0.460849  
C 2.385464 2.465820 2.266959  
C 3.319401 3.555325 1.731173  
C 2.814384 2.049393 3.675341  
H 1.372961 2.895748 2.342792  
H 4.369397 3.225447 1.766264  
H 3.084236 3.851137 0.699168  
H 3.239502 4.450069 2.364096  
H 2.092121 1.352962 4.125332

|   |           |           |           |
|---|-----------|-----------|-----------|
| H | 3.798799  | 1.555794  | 3.657893  |
| H | 2.895179  | 2.928727  | 4.329416  |
| H | 2.011399  | 0.363936  | 2.004681  |
| H | 0.204859  | 1.324079  | 0.903157  |
| C | 1.202762  | 2.519380  | -0.572331 |
| C | 0.461065  | 3.657926  | -0.239103 |
| C | 2.028921  | 2.547447  | -1.700417 |
| C | 0.572207  | 4.820081  | -1.000294 |
| H | -0.212192 | 3.636738  | 0.622060  |
| C | 2.140357  | 3.710544  | -2.462482 |
| H | 2.589691  | 1.658951  | -2.001726 |
| C | 1.419311  | 4.850998  | -2.108825 |
| H | -0.009450 | 5.702064  | -0.729602 |
| H | 2.790656  | 3.722268  | -3.337954 |
| H | 1.506800  | 5.759880  | -2.705406 |
| C | -1.272042 | 0.547071  | -1.007462 |
| H | -1.181066 | 1.568848  | -0.651291 |
| C | -2.487341 | 0.070991  | -1.396490 |
| C | -3.574347 | 1.059015  | -1.742922 |
| F | -3.672779 | 1.092857  | -3.086599 |
| F | -4.788477 | 0.758378  | -1.294393 |
| F | -3.294538 | 2.302207  | -1.356060 |
| O | -0.139814 | -1.395601 | -1.720570 |
| C | -0.129412 | -0.344137 | -1.111826 |
| H | 3.951689  | 1.659504  | 0.023513  |
| C | 5.767427  | -1.104510 | -0.059860 |
| H | 6.125449  | -0.252893 | 0.517062  |
| H | 7.696110  | -2.028670 | -0.203298 |
| H | -2.585726 | -0.896291 | -1.894019 |
| C | -6.648887 | -1.772321 | -0.628141 |
| H | -7.009213 | -0.738389 | -0.727050 |
| H | -6.904088 | -2.344772 | -1.525798 |
| H | -7.121985 | -2.224685 | 0.254150  |
| C | -4.723308 | -1.159660 | 0.545136  |
| O | -5.238430 | -1.798295 | -0.522738 |
| O | -5.427928 | -0.649749 | 1.390625  |
| C | -2.519557 | -2.377176 | 0.126493  |

O -2.786282 -3.226028 -0.722787  
 C -3.268527 -1.207803 0.542556  
 N -2.552602 -0.542531 1.581573  
 C -1.345752 -1.229258 1.812563  
 C -0.275247 -0.985122 2.689683  
 C -1.294183 -2.343446 0.958489  
 C 0.807728 -1.864672 2.665365  
 H -0.260249 -0.158059 3.392877  
 C -0.204496 -3.209550 0.938504  
 C 0.861052 -2.966568 1.798372  
 H 1.636181 -1.685000 3.353992  
 H -0.204579 -4.048494 0.239762  
 H 1.731765 -3.623606 1.806146  
 C -2.815032 0.793856 1.882960  
 O -3.579736 1.442235 1.204605  
 C -2.157439 1.386942 3.107091  
 H -2.141516 0.683031 3.947311  
 H -1.125589 1.698233 2.889041  
 H -2.729340 2.280555 3.377220

-----  
 PCMOpt/19\_TS\_SSh

Frequencies, energies and thermodynamic properties:

Lowest Vibrational Mode (1/cm) = -159.7020  
 2nd Lowest Vibrational Mode (1/cm) = 18.9236  
 E(RM062X) (a.u.) = -2588.52039376  
 Thermal correction to Enthalpy (a.u.) = 0.663505  
 Thermal correction to Gibbs Free Energy (a.u.) = 0.549312  
 Total Entropy (cal/Kmol) = 240.340  
 Esp(RM062X+D3) (a.u.) = -2591.12845628  
 Esp(D3) (a.u.) = -0.0109849920  
 Esp(RM062X) (a.u.) = -2591.1174712880

Optimised cartesian coordinates (Angstrom):

C 6.713682 -1.927329 -0.289005  
 C 6.332754 -3.007870 -1.098815  
 C 5.018903 -3.147194 -1.532130  
 C 4.093485 -2.182794 -1.131495  
 C 4.473710 -1.115149 -0.317237



H 7.076665 -3.746839 -1.396730  
H 4.717939 -3.981312 -2.166194  
C 2.241708 -0.641046 -0.605651  
C 1.086889 1.305411 0.357476  
C 2.177821 1.220883 1.437730  
C 3.522574 0.920418 0.804522  
H 4.269342 0.700417 1.577415  
S 2.392994 -2.100087 -1.541381  
N 3.393125 -0.271804 -0.034929  
N 1.106705 0.076116 -0.469492  
C 2.212690 2.443671 2.383132  
C 3.131842 3.577576 1.918687  
C 2.600543 1.995931 3.793851  
H 1.184123 2.838310 2.431277  
H 4.189541 3.279005 1.987107  
H 2.929317 3.897922 0.887191  
H 2.998100 4.449330 2.574219  
H 1.884371 1.263540 4.193559  
H 3.600064 1.533306 3.799046  
H 2.628779 2.855856 4.477447  
H 1.912318 0.341611 2.043132  
H 0.127043 1.282307 0.891321  
C 1.148857 2.550296 -0.502643  
C 0.355337 3.653118 -0.169397  
C 2.022114 2.639696 -1.591335  
C 0.461235 4.841828 -0.889246  
H -0.354633 3.581098 0.658907  
C 2.128198 3.829234 -2.312216  
H 2.623880 1.778880 -1.894028  
C 1.355035 4.934546 -1.956909  
H -0.160984 5.695838 -0.619034  
H 2.815296 3.889233 -3.157066  
H 1.438614 5.864120 -2.521320  
C -1.244612 0.515508 -1.094811  
H -1.204937 1.524339 -0.695591  
C -2.429450 0.011404 -1.545575  
C -3.534265 0.978325 -1.901411

F -3.598613 1.035189 -3.246594  
F -4.751407 0.642135 -1.490214  
F -3.294722 2.221373 -1.485882  
O -0.018557 -1.360105 -1.829263  
C -0.070033 -0.330605 -1.185028  
H 3.895069 1.750014 0.184908  
C 5.793950 -0.965033 0.112739  
H 6.101689 -0.123443 0.731814  
H 7.751438 -1.834819 0.031699  
H -2.470467 -0.932439 -2.093729  
C -6.752798 -0.838326 1.034610  
H -7.174487 -1.851683 0.986671  
H -7.136841 -0.313447 1.915167  
H -7.035591 -0.298564 0.119917  
C -4.674839 -1.443016 0.149721  
O -5.344104 -0.878287 1.172486  
O -5.249626 -2.004534 -0.759057  
C -2.415716 -2.491021 -0.129439  
O -2.621933 -3.319412 -1.013581  
C -3.227689 -1.361479 0.282359  
N -2.588883 -0.707415 1.380178  
C -1.369084 -1.361307 1.645998  
C -0.348188 -1.107353 2.578198  
C -1.235534 -2.445100 0.762194  
C 0.765494 -1.947952 2.579308  
H -0.391739 -0.299913 3.302637  
C -0.116309 -3.272977 0.768762  
C 0.898302 -3.021025 1.685247  
H 1.555122 -1.759587 3.309928  
H -0.053008 -4.088363 0.045509  
H 1.790637 -3.647674 1.715337  
C -2.902832 0.610186 1.715801  
O -3.650405 1.264608 1.024660  
C -2.331138 1.173075 2.996469  
H -2.320229 0.432083 3.804024  
H -1.307663 1.545944 2.844841  
H -2.959444 2.024457 3.277881

-----  
PCMopt/19\_TS\_SSi

Frequencies, energies and thermodynamic properties:

|                                                  |                  |
|--------------------------------------------------|------------------|
| Lowest Vibrational Mode (1/cm) =                 | -159.6560        |
| 2nd Lowest Vibrational Mode (1/cm) =             | 19.1207          |
| E(RM062X) (a.u.) =                               | -2588.52039374   |
| Thermal correction to Enthalpy (a.u.) =          | 0.663505         |
| Thermal correction to Gibbs Free Energy (a.u.) = | 0.549325         |
| Total Entropy (cal/Kmol) =                       | 240.313          |
| Esp(RM062X+D3) (a.u.) =                          | -2591.12845759   |
| Esp(D3) (a.u.) =                                 | -0.0109851091    |
| Esp(RM062X) (a.u.) =                             | -2591.1174724809 |

Optimised cartesian coordinates (Angstrom):

|   |          |           |           |
|---|----------|-----------|-----------|
| C | 6.713406 | -1.927583 | -0.288571 |
| C | 6.332518 | -3.007982 | -1.098589 |
| C | 5.018728 | -3.147133 | -1.532141 |
| C | 4.093326 | -2.182706 | -1.131529 |
| C | 4.473508 | -1.115204 | -0.317064 |
| H | 7.076413 | -3.746977 | -1.396477 |
| H | 4.717797 | -3.981140 | -2.166366 |
| C | 2.241585 | -0.640903 | -0.605738 |
| C | 1.086791 | 1.305550  | 0.357426  |
| C | 2.177582 | 1.220881  | 1.437807  |
| C | 3.522385 | 0.920344  | 0.804741  |
| H | 4.269044 | 0.700240  | 1.577710  |
| S | 2.392911 | -2.099803 | -1.541677 |
| N | 3.392947 | -0.271812 | -0.034809 |
| N | 1.106599 | 0.076297  | -0.469604 |
| C | 2.212444 | 2.443606  | 2.383289  |
| C | 3.131707 | 3.577484  | 1.918997  |
| C | 2.600162 | 1.995743  | 3.794007  |
| H | 1.183896 | 2.838305  | 2.431376  |
| H | 4.189382 | 3.278850  | 1.987510  |
| H | 2.929308 | 3.897893  | 0.887496  |
| H | 2.997946 | 4.449214  | 2.574558  |
| H | 1.883898 | 1.263396  | 4.193632  |
| H | 3.599635 | 1.533015  | 3.799235  |

|   |           |           |           |
|---|-----------|-----------|-----------|
| H | 2.628443  | 2.855623  | 4.477657  |
| H | 1.911933  | 0.341597  | 2.043124  |
| H | 0.126866  | 1.282531  | 0.891129  |
| C | 1.148939  | 2.550466  | -0.502634 |
| C | 0.355441  | 3.653310  | -0.169413 |
| C | 2.022315  | 2.639873  | -1.591230 |
| C | 0.461475  | 4.842052  | -0.889189 |
| H | -0.354617 | 3.581274  | 0.658817  |
| C | 2.128536  | 3.829443  | -2.312038 |
| H | 2.624068  | 1.779041  | -1.893907 |
| C | 1.355393  | 4.934777  | -1.956754 |
| H | -0.160728 | 5.696082  | -0.619000 |
| H | 2.815725  | 3.889451  | -3.156813 |
| H | 1.439079  | 5.864375  | -2.521110 |
| C | -1.244706 | 0.515793  | -1.094904 |
| H | -1.205040 | 1.524572  | -0.695549 |
| C | -2.429545 | 0.011731  | -1.545662 |
| C | -3.534460 | 0.978647  | -1.901188 |
| F | -3.599033 | 1.035697  | -3.246352 |
| F | -4.751513 | 0.642333  | -1.489833 |
| F | -3.294909 | 2.221646  | -1.485519 |
| O | -0.018605 | -1.359656 | -1.829705 |
| C | -0.070098 | -0.330290 | -1.185266 |
| H | 3.895016  | 1.749947  | 0.185219  |
| C | 5.793692  | -0.965260 | 0.113149  |
| H | 6.101402  | -0.123782 | 0.732390  |
| H | 7.751116  | -1.835208 | 0.032321  |
| H | -2.470601 | -0.932061 | -2.093901 |
| C | -6.752526 | -0.838443 | 1.035332  |
| H | -7.174250 | -1.851784 | 0.987374  |
| H | -7.136357 | -0.313654 | 1.916036  |
| H | -7.035516 | -0.298570 | 0.120765  |
| C | -4.674778 | -1.443073 | 0.149895  |
| O | -5.343802 | -0.878450 | 1.172883  |
| O | -5.249796 | -2.004465 | -0.758814 |
| C | -2.415694 | -2.491016 | -0.129929 |
| O | -2.622008 | -3.319202 | -1.014249 |

|   |           |           |          |
|---|-----------|-----------|----------|
| C | -3.227606 | -1.361576 | 0.282232 |
| N | -2.588627 | -0.707706 | 1.380065 |
| C | -1.368817 | -1.361673 | 1.645613 |
| C | -0.347802 | -1.107906 | 2.577725 |
| C | -1.235406 | -2.445306 | 0.761587 |
| C | 0.765851  | -1.948547 | 2.578572 |
| H | -0.391245 | -0.300575 | 3.302293 |
| C | -0.116221 | -3.273238 | 0.767909 |
| C | 0.898500  | -3.021488 | 1.684333 |
| H | 1.555580  | -1.760313 | 3.309118 |
| H | -0.053027 | -4.088505 | 0.044512 |
| H | 1.790806  | -3.648187 | 1.714225 |
| C | -2.902505 | 0.609841  | 1.715965 |
| O | -3.650085 | 1.264440  | 1.024997 |
| C | -2.330708 | 1.172442  | 2.996718 |
| H | -2.319596 | 0.431231  | 3.804067 |
| H | -1.307303 | 1.545492  | 2.845046 |
| H | -2.959079 | 2.023670  | 3.278453 |

-----  
PCMopt/19\_TS\_SSj

Frequencies, energies and thermodynamic properties:

|                                                  |                  |
|--------------------------------------------------|------------------|
| Lowest Vibrational Mode (1/cm) =                 | -212.8547        |
| 2nd Lowest Vibrational Mode (1/cm) =             | 17.6807          |
| E(RM062X) (a.u.) =                               | -2588.51756560   |
| Thermal correction to Enthalpy (a.u.) =          | 0.663299         |
| Thermal correction to Gibbs Free Energy (a.u.) = | 0.548360         |
| Total Entropy (cal/Kmol) =                       | 241.910          |
| Esp(RM062X+D3) (a.u.) =                          | -2591.12029126   |
| Esp(D3) (a.u.) =                                 | -0.0108754548    |
| Esp(RM062X) (a.u.) =                             | -2591.1094158052 |

Optimised cartesian coordinates (Angstrom):

|   |          |           |           |
|---|----------|-----------|-----------|
| C | 6.886997 | -1.679907 | -0.270908 |
| C | 6.552360 | -2.844122 | -0.977952 |
| C | 5.238914 | -3.092636 | -1.362468 |
| C | 4.267524 | -2.152237 | -1.018854 |
| C | 4.602865 | -0.999079 | -0.307718 |
| H | 7.331162 | -3.562739 | -1.233583 |

|   |           |           |           |
|---|-----------|-----------|-----------|
| H | 4.973248  | -3.993167 | -1.916581 |
| C | 2.340187  | -0.673372 | -0.577196 |
| C | 1.086809  | 1.254015  | 0.292877  |
| C | 2.206440  | 1.296335  | 1.345011  |
| C | 3.553951  | 1.053518  | 0.692363  |
| H | 4.335413  | 0.932597  | 1.452911  |
| S | 2.554120  | -2.202340 | -1.385041 |
| N | 3.482655  | -0.195801 | -0.067579 |
| N | 1.172528  | -0.014387 | -0.472086 |
| C | 2.174252  | 2.561661  | 2.232003  |
| C | 2.998367  | 3.734108  | 1.691282  |
| C | 2.628862  | 2.213516  | 3.651037  |
| H | 1.119417  | 2.877778  | 2.289893  |
| H | 4.075885  | 3.512142  | 1.742717  |
| H | 2.748348  | 3.990743  | 0.652530  |
| H | 2.821067  | 4.624756  | 2.310337  |
| H | 1.978563  | 1.452341  | 4.105705  |
| H | 3.659794  | 1.825527  | 3.650742  |
| H | 2.610294  | 3.105924  | 4.292265  |
| H | 2.015792  | 0.432493  | 1.999015  |
| H | 0.144715  | 1.203079  | 0.856194  |
| C | 1.049201  | 2.456338  | -0.625525 |
| C | 0.184535  | 3.512345  | -0.315676 |
| C | 1.888635  | 2.561553  | -1.738619 |
| C | 0.190418  | 4.675566  | -1.083418 |
| H | -0.500122 | 3.412094  | 0.531354  |
| C | 1.893495  | 3.725543  | -2.508045 |
| H | 2.542330  | 1.731928  | -2.020836 |
| C | 1.052340  | 4.787700  | -2.175723 |
| H | -0.484717 | 5.494717  | -0.832252 |
| H | 2.555057  | 3.799967  | -3.372081 |
| H | 1.057723  | 5.697550  | -2.777393 |
| C | -1.197901 | 0.246344  | -1.078785 |
| H | -1.204316 | 1.259253  | -0.687590 |
| C | -2.376943 | -0.327195 | -1.493104 |
| C | -3.492824 | 0.617566  | -1.837383 |
| F | -3.210668 | 1.283488  | -2.965054 |

|   |           |           |           |
|---|-----------|-----------|-----------|
| F | -4.664016 | 0.014595  | -2.043678 |
| F | -3.676480 | 1.541846  | -0.884940 |
| O | 0.107154  | -1.619770 | -1.691409 |
| C | 0.003938  | -0.542072 | -1.130599 |
| H | 3.849843  | 1.868148  | 0.014334  |
| C | 5.921035  | -0.740368 | 0.073364  |
| H | 6.192408  | 0.166090  | 0.612744  |
| H | 7.924205  | -1.502138 | 0.013677  |
| H | -2.383453 | -1.272932 | -2.040936 |
| C | -6.826841 | -0.465277 | 0.378829  |
| H | -7.302214 | -1.381015 | 0.753838  |
| H | -7.251618 | 0.412828  | 0.876380  |
| H | -6.982975 | -0.401628 | -0.706383 |
| C | -4.712845 | -1.446970 | 0.141784  |
| O | -5.440575 | -0.456475 | 0.676594  |
| O | -5.228857 | -2.328168 | -0.508249 |
| C | -2.461323 | -2.533403 | 0.118572  |
| O | -2.675568 | -3.450238 | -0.665242 |
| C | -3.271210 | -1.332320 | 0.374249  |
| N | -2.598193 | -0.547306 | 1.393231  |
| C | -1.371337 | -1.185854 | 1.674718  |
| C | -0.357613 | -0.838388 | 2.588766  |
| C | -1.272966 | -2.386518 | 0.968068  |
| C | 0.722262  | -1.704376 | 2.724213  |
| H | -0.405471 | 0.075484  | 3.175905  |
| C | -0.173454 | -3.237513 | 1.091983  |
| C | 0.838474  | -2.890129 | 1.974038  |
| H | 1.507767  | -1.449782 | 3.439382  |
| H | -0.133317 | -4.148617 | 0.492246  |
| H | 1.714303  | -3.528134 | 2.097791  |
| C | -2.753418 | 0.798800  | 1.789283  |
| O | -1.759664 | 1.473880  | 1.986285  |
| C | -4.105605 | 1.377182  | 2.114834  |
| H | -4.637585 | 1.667040  | 1.204145  |
| H | -4.729141 | 0.656546  | 2.651403  |
| H | -3.912178 | 2.265706  | 2.725261  |

-----

PCMopt/19\_TS\_SSk

Frequencies, energies and thermodynamic properties:

|                                                  |                  |
|--------------------------------------------------|------------------|
| Lowest Vibrational Mode (1/cm) =                 | -384.9261        |
| 2nd Lowest Vibrational Mode (1/cm) =             | 14.2537          |
| E(RM062X) (a.u.) =                               | -2588.51905567   |
| Thermal correction to Enthalpy (a.u.) =          | 0.663101         |
| Thermal correction to Gibbs Free Energy (a.u.) = | 0.549019         |
| Total Entropy (cal/Kmol) =                       | 240.108          |
| Esp(RM062X+D3) (a.u.) =                          | -2591.11995660   |
| Esp(D3) (a.u.) =                                 | -0.0106748388    |
| Esp(RM062X) (a.u.) =                             | -2591.1092817612 |

Optimised cartesian coordinates (Angstrom):

|   |           |           |           |
|---|-----------|-----------|-----------|
| C | -6.717982 | 2.088455  | 0.005560  |
| C | -6.341013 | 3.215474  | -0.737414 |
| C | -5.033196 | 3.366862  | -1.190061 |
| C | -4.112429 | 2.366231  | -0.882815 |
| C | -4.490051 | 1.249950  | -0.134644 |
| H | -7.080447 | 3.982633  | -0.967770 |
| H | -4.735385 | 4.240474  | -1.770474 |
| C | -2.273751 | 0.751511  | -0.524473 |
| C | -1.150388 | -1.275589 | 0.243427  |
| C | -2.149647 | -1.190640 | 1.409811  |
| C | -3.528444 | -0.833809 | 0.884426  |
| H | -4.212053 | -0.606812 | 1.712826  |
| S | -2.410410 | 2.304220  | -1.312279 |
| N | -3.418672 | 0.372744  | 0.064298  |
| N | -1.178047 | -0.009979 | -0.522330 |
| C | -2.150623 | -2.439881 | 2.319870  |
| C | -3.126231 | -3.539849 | 1.889756  |
| C | -2.431123 | -2.030183 | 3.767279  |
| H | -1.130024 | -2.858788 | 2.282493  |
| H | -4.169091 | -3.219518 | 2.040254  |
| H | -3.003755 | -3.833367 | 0.838004  |
| H | -2.969064 | -4.433565 | 2.509842  |
| H | -1.677327 | -1.320385 | 4.136693  |
| H | -3.419441 | -1.552098 | 3.855284  |
| H | -2.427172 | -2.909756 | 4.426269  |



H -1.805299 -0.334379 2.013507  
H -0.146611 -1.330276 0.687188  
C -1.325992 -2.482112 -0.653401  
C -0.526914 -3.608607 -0.427094  
C -2.291659 -2.518729 -1.663989  
C -0.721848 -4.771781 -1.170111  
H 0.260300 -3.561259 0.330646  
C -2.485359 -3.682239 -2.409191  
H -2.896430 -1.635074 -1.883840  
C -1.708751 -4.813563 -2.156245  
H -0.096260 -5.645845 -0.983831  
H -3.243941 -3.702863 -3.192797  
H -1.862247 -5.722888 -2.738953  
C 1.121936 -0.427202 -1.210619  
H 0.967776 -1.489207 -1.048677  
C 2.437791 0.058255 -1.268316  
C 3.442012 -0.831901 -1.948652  
F 3.244335 -0.825179 -3.274569  
F 4.704188 -0.460018 -1.750910  
F 3.336851 -2.110134 -1.555244  
O 0.040657 1.667401 -1.490480  
C 0.054402 0.496782 -1.121055  
H -3.969254 -1.641286 0.280557  
C -5.800369 1.089527 0.317928  
H -6.102420 0.211132 0.887080  
H -7.749047 1.986486 0.344771  
H 2.558046 1.103962 -1.571929  
C 4.510406 -2.975243 1.180547  
H 4.004928 -3.500614 0.360168  
H 5.585255 -3.176111 1.156375  
H 4.082582 -3.302029 2.137097  
C 3.121074 -1.104072 1.025188  
O 4.368247 -1.568802 1.023725  
O 2.152487 -1.817535 1.194109  
C 4.210413 1.249999 0.513960  
O 5.394749 1.010493 0.426435  
C 3.047609 0.319397 0.661899

|   |           |           |           |
|---|-----------|-----------|-----------|
| N | 1.939109  | 1.126188  | 1.090386  |
| C | 2.214336  | 2.465972  | 0.732196  |
| C | 1.377480  | 3.582939  | 0.711090  |
| C | 3.573534  | 2.588043  | 0.416782  |
| C | 1.956190  | 4.809715  | 0.377422  |
| H | 0.317176  | 3.492427  | 0.925710  |
| C | 4.141308  | 3.814573  | 0.088533  |
| C | 3.317292  | 4.938140  | 0.068670  |
| H | 1.319215  | 5.695546  | 0.348053  |
| H | 5.205531  | 3.875074  | -0.146029 |
| H | 3.723994  | 5.915222  | -0.193476 |
| C | 0.876153  | 0.831742  | 1.945788  |
| O | -0.161401 | 1.461465  | 1.853907  |
| C | 1.069542  | -0.148308 | 3.079217  |
| H | 0.582167  | -1.106174 | 2.857117  |
| H | 2.122226  | -0.341385 | 3.307148  |
| H | 0.575378  | 0.305188  | 3.948005  |

-----  
 PCMOpt/19\_TS\_SSI

Frequencies, energies and thermodynamic properties:

|                                                  |                  |
|--------------------------------------------------|------------------|
| Lowest Vibrational Mode (1/cm) =                 | -369.3854        |
| 2nd Lowest Vibrational Mode (1/cm) =             | 22.9114          |
| E(RM062X) (a.u.) =                               | -2588.51491205   |
| Thermal correction to Enthalpy (a.u.) =          | 0.663363         |
| Thermal correction to Gibbs Free Energy (a.u.) = | 0.549945         |
| Total Entropy (cal/Kmol) =                       | 238.707          |
| Esp(RM062X+D3) (a.u.) =                          | -2591.11620455   |
| Esp(D3) (a.u.) =                                 | -0.0106700603    |
| Esp(RM062X) (a.u.) =                             | -2591.1055344897 |

Optimised cartesian coordinates (Angstrom):

|   |           |          |           |
|---|-----------|----------|-----------|
| C | -6.715923 | 2.194333 | 0.086599  |
| C | -6.347137 | 3.305156 | -0.684516 |
| C | -5.046122 | 3.444616 | -1.159685 |
| C | -4.124546 | 2.446672 | -0.846685 |
| C | -4.493190 | 1.346545 | -0.070138 |
| H | -7.087971 | 4.069656 | -0.919001 |
| H | -4.754753 | 4.305814 | -1.761302 |

C -2.286657 0.833196 -0.482000  
C -1.191866 -1.224536 0.243870  
C -2.138571 -1.115760 1.447922  
C -3.528302 -0.717239 0.985973  
H -4.163393 -0.449576 1.840827  
S -2.428786 2.372823 -1.294072  
N -3.421501 0.470200 0.133638  
N -1.189585 0.069566 -0.479009  
C -2.120520 -2.367721 2.352990  
C -3.164669 -3.426922 1.990104  
C -2.266519 -1.949364 3.817035  
H -1.120203 -2.817184 2.237267  
H -4.182888 -3.068247 2.208613  
H -3.121820 -3.720062 0.931403  
H -3.001194 -4.329152 2.596190  
H -1.452553 -1.270416 4.107913  
H -3.224893 -1.432692 3.985521  
H -2.240597 -2.827859 4.477283  
H -1.734644 -0.283547 2.046129  
H -0.181653 -1.336751 0.658615  
C -1.469634 -2.392073 -0.678226  
C -0.712294 -3.559078 -0.520879  
C -2.481255 -2.358443 -1.643859  
C -0.991872 -4.689771 -1.287170  
H 0.109390 -3.565001 0.200352  
C -2.758968 -3.489336 -2.412325  
H -3.059058 -1.446151 -1.813234  
C -2.022263 -4.659812 -2.228050  
H -0.397898 -5.595202 -1.154621  
H -3.552467 -3.453389 -3.160006  
H -2.241655 -5.543581 -2.828768  
C 1.064701 -0.413938 -1.258290  
H 0.840966 -1.471853 -1.161551  
C 2.401379 -0.017108 -1.297252  
C 3.369093 -0.963599 -1.951922  
F 3.171478 -0.991732 -3.277841  
F 4.642428 -0.624631 -1.764983

F 3.221919 -2.222905 -1.518324  
O 0.074882 1.749757 -1.380383  
C 0.045506 0.558102 -1.087606  
H -4.026799 -1.517644 0.418755  
C -5.796682 1.199176 0.405543  
H -6.091424 0.333629 0.997736  
H -7.741974 2.102710 0.443371  
H 2.617205 1.030216 -1.532079  
C 4.061006 -3.262487 1.358210  
H 3.636679 -3.721846 0.455441  
H 5.107233 -3.559397 1.478673  
H 3.473490 -3.578971 2.230142  
C 2.865227 -1.275626 1.066257  
O 4.062557 -1.848462 1.237237  
O 1.842308 -1.923900 1.072672  
C 4.310448 0.862485 0.635816  
O 5.446756 0.436130 0.629280  
C 3.004076 0.152904 0.714162  
N 2.013602 1.154250 1.037567  
C 2.549626 2.418168 0.663623  
C 1.943966 3.659063 0.442845  
C 3.929043 2.285426 0.463832  
C 2.761664 4.733306 0.081438  
H 0.872776 3.813818 0.506062  
C 4.739862 3.356420 0.107916  
C 4.145702 4.602393 -0.076342  
H 2.292684 5.702514 -0.095396  
H 5.810771 3.197685 -0.030625  
H 4.745492 5.466589 -0.362718  
C 0.948307 0.976968 1.917657  
O 0.836180 -0.022170 2.596472  
C -0.072102 2.088011 1.998049  
H 0.368138 2.987428 2.450145  
H -0.454707 2.355846 1.003733  
H -0.886291 1.741185 2.643645

-----  
PCMopt\_microsolvl/16\_TS\_SRa-bi\_solv

Frequencies, energies and thermodynamic properties:

|                                                  |                  |
|--------------------------------------------------|------------------|
| Lowest Vibrational Mode (1/cm) =                 | -153.1938        |
| 2nd Lowest Vibrational Mode (1/cm) =             | 19.4318          |
| E(RM062X) (a.u.) =                               | -2995.01373804   |
| Thermal correction to Enthalpy (a.u.) =          | 0.916384         |
| Thermal correction to Gibbs Free Energy (a.u.) = | 0.766593         |
| Total Entropy (cal/Kmol) =                       | 315.261          |
| Esp(RM062X+D3) (a.u.) =                          | -2998.09196882   |
| Esp(D3) (a.u.) =                                 | -0.0160270786    |
| Esp(RM062X) (a.u.) =                             | -2998.0759417414 |
| Esp(RM062X+D3) SMD (a.u.) =                      | -2998.11322448   |
| Esp(RM062X) SMD (a.u.) =                         | -2998.0971974014 |

Optimised cartesian coordinates (Angstrom):

|   |           |           |           |
|---|-----------|-----------|-----------|
| C | 5.703440  | 0.022941  | -0.667125 |
| C | 5.450242  | -0.623472 | -1.886341 |
| C | 4.148000  | -0.835456 | -2.323504 |
| C | 3.107367  | -0.396660 | -1.507290 |
| C | 3.358942  | 0.228129  | -0.286622 |
| H | 6.285209  | -0.956767 | -2.503360 |
| H | 3.943035  | -1.329629 | -3.273782 |
| C | 1.062604  | 0.257107  | -0.295467 |
| C | -0.356874 | 1.096074  | 1.549954  |
| C | 0.882015  | 0.776566  | 2.403227  |
| C | 2.142944  | 1.215079  | 1.679757  |
| H | 3.035412  | 0.901661  | 2.235662  |
| S | 1.393018  | -0.532026 | -1.810671 |
| N | 2.174304  | 0.551280  | 0.380060  |
| N | -0.171607 | 0.547073  | 0.179492  |
| C | 0.795044  | 1.298739  | 3.854771  |
| C | 1.355709  | 2.710226  | 4.052604  |
| C | 1.492928  | 0.316310  | 4.797612  |
| H | -0.273483 | 1.313289  | 4.124895  |
| H | 2.447856  | 2.722901  | 3.911254  |
| H | 0.910902  | 3.446124  | 3.368652  |
| H | 1.158328  | 3.043073  | 5.081242  |
| H | 1.032807  | -0.681397 | 4.746996  |
| H | 2.560274  | 0.214400  | 4.543911  |

|   |           |           |           |
|---|-----------|-----------|-----------|
| H | 1.432677  | 0.668816  | 5.836805  |
| H | 0.917280  | -0.322773 | 2.454881  |
| H | -1.183759 | 0.517200  | 1.985600  |
| C | -0.733144 | 2.563239  | 1.532464  |
| C | -1.709090 | 3.024471  | 2.423107  |
| C | -0.082305 | 3.473352  | 0.694238  |
| C | -2.012182 | 4.382827  | 2.497015  |
| H | -2.238813 | 2.315550  | 3.065030  |
| C | -0.391002 | 4.833177  | 0.767255  |
| H | 0.673233  | 3.136630  | -0.022138 |
| C | -1.348625 | 5.292010  | 1.671505  |
| H | -2.773058 | 4.730825  | 3.196838  |
| H | 0.123843  | 5.535895  | 0.110109  |
| H | -1.586172 | 6.355297  | 1.726579  |
| C | -2.621138 | 0.668952  | -0.150570 |
| H | -2.746739 | 1.259150  | 0.753024  |
| C | -3.708448 | 0.256328  | -0.854957 |
| C | -5.032659 | 0.902173  | -0.558299 |
| F | -5.004300 | 2.198236  | -0.908747 |
| F | -6.040023 | 0.355013  | -1.238275 |
| F | -5.343559 | 0.869319  | 0.738813  |
| O | -1.120387 | -0.184365 | -1.755443 |
| C | -1.307396 | 0.302646  | -0.657081 |
| H | 2.192530  | 2.303656  | 1.522941  |
| C | 4.665115  | 0.461985  | 0.148715  |
| H | 4.874068  | 0.976936  | 1.086126  |
| H | 6.733750  | 0.192475  | -0.351502 |
| H | -3.610430 | -0.225069 | -1.829883 |
| C | -7.441710 | -2.449444 | -1.802564 |
| H | -7.897293 | -1.468938 | -1.603842 |
| H | -7.536972 | -2.698319 | -2.864942 |
| H | -7.961540 | -3.202671 | -1.193872 |
| C | -5.729264 | -2.111279 | -0.244559 |
| O | -6.057360 | -2.425232 | -1.517587 |
| O | -6.591962 | -1.928615 | 0.599723  |
| C | -3.263469 | -2.546976 | -0.851644 |
| O | -3.268737 | -2.854597 | -2.043330 |

C -4.309908 -2.016053 -0.004715  
C -2.363827 -2.216183 1.321882  
C -1.377885 -2.217906 2.311382  
C -2.048231 -2.625835 0.024499  
C -0.087356 -2.628080 1.968603  
H -1.608507 -1.914005 3.335690  
C -0.755686 -3.014818 -0.326471  
C 0.234236 -3.010003 0.655465  
H 0.687159 -2.658330 2.738742  
H -0.536823 -3.300874 -1.357634  
H 1.263366 -3.285336 0.408663  
C -3.820545 -1.841185 1.409748  
H -3.933312 -0.805730 1.779213  
H -4.360533 -2.485779 2.123670  
C 1.842424 2.574144 -2.645958  
O 2.183519 2.793581 -1.483232  
N 2.757300 2.311861 -3.609165  
C 0.377187 2.587201 -3.034548  
H 0.178895 3.352025 -3.798399  
H 0.051271 1.613817 -3.425600  
H -0.209663 2.821713 -2.138555  
C 2.443077 2.086807 -5.005833  
H 2.808154 2.919665 -5.627738  
H 2.930164 1.162206 -5.350286  
H 1.365835 1.983588 -5.158825  
C 4.170310 2.402193 -3.288749  
H 4.570082 3.397120 -3.546210  
H 4.317279 2.222595 -2.218044  
H 4.721395 1.645338 -3.862561  
O 3.542943 -3.100651 -0.041585  
C 4.265358 -2.764764 0.890341  
C 3.672054 -2.103873 2.120517  
N 5.605066 -2.984418 0.890341  
H 3.578496 -2.835909 2.937573  
H 2.667943 -1.755201 1.848970  
H 4.275002 -1.264025 2.488633  
C 6.249201 -3.536457 -0.284735

|   |          |           |           |
|---|----------|-----------|-----------|
| C | 6.485722 | -2.583643 | 1.970082  |
| H | 7.038145 | -2.853656 | -0.637323 |
| H | 6.709309 | -4.510141 | -0.054382 |
| H | 5.502424 | -3.661661 | -1.074095 |
| H | 6.874193 | -1.560894 | 1.823429  |
| H | 5.980914 | -2.637828 | 2.940276  |
| H | 7.339871 | -3.272775 | 2.002434  |

-----  
 PCMopt\_microsolv/16\_TS\_SRa-mono\_solv

Frequencies, energies and thermodynamic properties:

|                                                  |                  |
|--------------------------------------------------|------------------|
| Lowest Vibrational Mode (1/cm) =                 | -154.4058        |
| 2nd Lowest Vibrational Mode (1/cm) =             | 20.5281          |
| E(RM062X) (a.u.) =                               | -2707.51617704   |
| Thermal correction to Enthalpy (a.u.) =          | 0.774911         |
| Thermal correction to Gibbs Free Energy (a.u.) = | 0.646253         |
| Total Entropy (cal/Kmol) =                       | 270.784          |
| Esp(RM062X+D3) (a.u.) =                          | -2710.26197331   |
| Esp(D3) (a.u.) =                                 | -0.0127741745    |
| Esp(RM062X) (a.u.) =                             | -2710.2491991355 |
| Esp(RM062X+D3) SMD (a.u.) =                      | -2710.28120035   |
| Esp(RM062X) SMD (a.u.) =                         | -2710.2684261755 |

Optimised cartesian coordinates (Angstrom):

|   |          |           |          |
|---|----------|-----------|----------|
| C | 5.991903 | -1.389763 | 1.621580 |
| C | 5.685758 | -2.694316 | 1.206401 |
| C | 4.425889 | -3.005623 | 0.706897 |
| C | 3.478854 | -1.983445 | 0.641794 |
| C | 3.780045 | -0.689846 | 1.070769 |
| H | 6.446650 | -3.472616 | 1.267795 |
| H | 4.183733 | -4.014507 | 0.371250 |
| C | 1.608889 | -0.397455 | 0.384594 |
| C | 0.318334 | 1.704117  | 0.599961 |
| C | 1.335951 | 2.005503  | 1.712905 |
| C | 2.728699 | 1.582989  | 1.281734 |
| H | 3.437363 | 1.700546  | 2.110221 |
| S | 1.841600 | -2.088315 | 0.037155 |
| N | 2.685101 | 0.165948  | 0.932579 |
| N | 0.469908 | 0.293679  | 0.149260 |



|   |           |           |           |
|---|-----------|-----------|-----------|
| C | 1.273823  | 3.455526  | 2.243301  |
| C | 2.179548  | 4.441174  | 1.498887  |
| C | 1.599105  | 3.470294  | 3.738324  |
| H | 0.230813  | 3.793150  | 2.127933  |
| H | 3.241337  | 4.214654  | 1.683426  |
| H | 2.011039  | 4.442157  | 0.413327  |
| H | 1.996570  | 5.459464  | 1.869798  |
| H | 0.890669  | 2.852066  | 4.308368  |
| H | 2.614468  | 3.085781  | 3.924365  |
| H | 1.555181  | 4.494930  | 4.133160  |
| H | 1.057188  | 1.341380  | 2.544513  |
| H | -0.672064 | 1.751943  | 1.074410  |
| C | 0.359828  | 2.678731  | -0.558499 |
| C | -0.532629 | 3.756666  | -0.571917 |
| C | 1.312348  | 2.561815  | -1.575079 |
| C | -0.456453 | 4.723550  | -1.572888 |
| H | -1.294998 | 3.842117  | 0.207249  |
| C | 1.383469  | 3.529414  | -2.579184 |
| H | 2.012197  | 1.720892  | -1.594359 |
| C | 0.506962  | 4.614377  | -2.577047 |
| H | -1.155292 | 5.561078  | -1.571468 |
| H | 2.132100  | 3.431069  | -3.366950 |
| H | 0.566688  | 5.369430  | -3.362140 |
| C | -1.817853 | 0.400084  | -0.780017 |
| H | -1.852732 | 1.478423  | -0.652780 |
| C | -2.924664 | -0.272144 | -1.196755 |
| C | -4.047427 | 0.530728  | -1.791091 |
| F | -3.663663 | 1.067213  | -2.960707 |
| F | -5.129631 | -0.200781 | -2.055574 |
| F | -4.416348 | 1.548953  | -1.011490 |
| O | -0.463205 | -1.528167 | -0.848356 |
| C | -0.610553 | -0.365768 | -0.520990 |
| H | 3.102082  | 2.146466  | 0.412683  |
| C | 5.047921  | -0.369684 | 1.560897  |
| H | 5.300600  | 0.640937  | 1.878753  |
| H | 6.989676  | -1.165735 | 1.999402  |
| H | -2.888777 | -1.329866 | -1.463820 |

C -7.222955 -2.157332 -0.689746  
H -7.404202 -1.321617 -1.380508  
H -7.351937 -3.110578 -1.213433  
H -7.941561 -2.084883 0.138594  
C -5.527712 -1.020599 0.454341  
O -5.890879 -2.135177 -0.217054  
O -6.334328 -0.133574 0.682607  
C -3.256848 -2.140347 0.929940  
O -3.308710 -3.239175 0.378944  
C -4.139551 -0.994585 0.852841  
C -2.368428 -0.426863 2.315424  
C -1.452850 0.161444 3.191526  
C -2.143315 -1.721367 1.842587  
C -0.325946 -0.570226 3.575930  
H -1.615960 1.170043 3.580440  
C -1.013708 -2.451205 2.210426  
C -0.100216 -1.865373 3.084269  
H 0.388679 -0.132215 4.276365  
H -0.859663 -3.453844 1.806101  
H 0.794546 -2.410329 3.391669  
C -3.666309 0.107855 1.765281  
H -3.503685 1.064581 1.236224  
H -4.386197 0.319502 2.573705  
C 3.255186 -0.747340 -2.552217  
O 3.511585 0.227349 -1.844402  
N 4.159704 -1.737361 -2.738387  
C 1.907851 -0.868902 -3.236458  
H 2.023236 -0.901027 -4.328963  
H 1.368644 -1.771522 -2.918609  
H 1.311130 0.011526 -2.970180  
C 3.956570 -2.890693 -3.592129  
H 4.623148 -2.849399 -4.468170  
H 4.181809 -3.810881 -3.032342  
H 2.923215 -2.947397 -3.943478  
C 5.492873 -1.592608 -2.182049  
H 6.185883 -1.163839 -2.924870  
H 5.457239 -0.936360 -1.305347

H 5.869337 -2.579569 -1.882214

-----

PCMopt\_microsolv/16\_TS\_SSa-bi\_solv

Frequencies, energies and thermodynamic properties:

Lowest Vibrational Mode (1/cm) = -217.0731  
2nd Lowest Vibrational Mode (1/cm) = 19.1704  
E(RM062X) (a.u.) = -2995.02267528  
Thermal correction to Enthalpy (a.u.) = 0.916459  
Thermal correction to Gibbs Free Energy (a.u.) = 0.767515  
Total Entropy (cal/Kmol) = 313.479  
Esp(RM062X+D3) (a.u.) = -2998.09476332  
Esp(D3) (a.u.) = -0.0162231615  
Esp(RM062X) (a.u.) = -2998.0785401585  
Esp(RM062X+D3) SMD (a.u.) = -2998.11503183  
Esp(RM062X) SMD (a.u.) = -2998.0988086685

Optimised cartesian coordinates (Angstrom):

C 5.832837 0.023327 -0.448163  
C 5.779682 1.044557 0.511164  
C 4.576120 1.383402 1.121929  
C 3.428972 0.690846 0.739044  
C 3.479860 -0.312897 -0.229146  
H 6.692270 1.572670 0.789120  
H 4.528212 2.169253 1.877194  
C 1.235567 -0.319925 0.241632  
C -0.458098 -1.659110 -0.939350  
C 0.560385 -1.572294 -2.088426  
C 1.964999 -1.808227 -1.558017  
H 2.709859 -1.632087 -2.345481  
S 1.793767 0.947109 1.303229  
N 2.217986 -0.841292 -0.494772  
N -0.036160 -0.742269 0.148974  
C 0.210038 -2.464345 -3.299384  
C 0.763340 -3.890844 -3.220110  
C 0.679438 -1.799059 -4.594682  
H -0.890259 -2.525100 -3.338287  
H 1.861473 -3.890651 -3.304923  
H 0.490498 -4.405208 -2.288583

H 0.374346 -4.484147 -4.059837  
H 0.246717 -0.795165 -4.711415  
H 1.777295 -1.705372 -4.612563  
H 0.389948 -2.402392 -5.466727  
H 0.528267 -0.519093 -2.414829  
H -1.386799 -1.217236 -1.322284  
C -0.730891 -3.058625 -0.433906  
C -1.849169 -3.745557 -0.919791  
C 0.134336 -3.701503 0.457689  
C -2.084472 -5.068415 -0.548263  
H -2.542053 -3.238555 -1.596543  
C -0.105858 -5.024862 0.832778  
H 1.001592 -3.178118 0.872234  
C -1.208054 -5.713726 0.325675  
H -2.957644 -5.594257 -0.937087  
H 0.575922 -5.518176 1.527628  
H -1.391088 -6.748347 0.619487  
C -2.389706 -0.603925 0.886046  
H -2.650198 -1.523811 0.370661  
C -3.368500 0.246743 1.339373  
C -4.720390 -0.312328 1.670550  
F -4.678297 -0.943797 2.854910  
F -5.668446 0.619834 1.780409  
F -5.142693 -1.212375 0.775958  
O -0.687107 0.813590 1.679372  
C -1.040062 -0.112128 0.961462  
H 2.108205 -2.826125 -1.164030  
C 4.688387 -0.673056 -0.827810  
H 4.743436 -1.474784 -1.563896  
H 6.787806 -0.237340 -0.905377  
H -3.085255 1.096948 1.965191  
C -5.357961 -0.956868 -2.356388  
H -5.938862 -0.389265 -3.096095  
H -4.790290 -1.749722 -2.854536  
H -6.052123 -1.391959 -1.624175  
C -4.916670 0.922667 -1.038312  
O -4.408640 -0.128317 -1.710014

|   |           |           |           |
|---|-----------|-----------|-----------|
| O | -6.110857 | 1.156019  | -1.033364 |
| C | -2.536855 | 1.810689  | -0.756389 |
| O | -1.852964 | 0.987495  | -1.364399 |
| C | -3.914998 | 1.705789  | -0.327216 |
| C | -3.043145 | 3.774287  | 0.450715  |
| C | -2.777287 | 4.996034  | 1.069981  |
| C | -2.013482 | 3.091824  | -0.200765 |
| C | -1.480205 | 5.511225  | 1.006209  |
| H | -3.564105 | 5.544224  | 1.592397  |
| C | -0.713304 | 3.593566  | -0.270793 |
| C | -0.455800 | 4.818909  | 0.341911  |
| H | -1.258362 | 6.468546  | 1.481437  |
| H | 0.069635  | 3.024461  | -0.782338 |
| H | 0.548009  | 5.247302  | 0.311712  |
| C | -4.332502 | 2.991415  | 0.355126  |
| H | -5.088443 | 3.533387  | -0.237527 |
| H | -4.780956 | 2.826977  | 1.348462  |
| O | 2.687063  | -2.397723 | 1.976599  |
| C | 2.465555  | -1.740419 | 2.992712  |
| C | 1.054103  | -1.607737 | 3.532501  |
| H | 0.737153  | -0.558093 | 3.599021  |
| H | 0.380655  | -2.139965 | 2.849988  |
| H | 0.972356  | -2.057596 | 4.532200  |
| N | 3.467638  | -1.115493 | 3.656616  |
| C | 4.834207  | -1.273869 | 3.192905  |
| H | 4.837282  | -1.500430 | 2.120574  |
| H | 5.384940  | -0.339585 | 3.366140  |
| H | 5.344828  | -2.086920 | 3.735110  |
| C | 3.298875  | -0.330101 | 4.861912  |
| H | 2.258368  | -0.333966 | 5.196293  |
| H | 3.923341  | -0.737125 | 5.671967  |
| H | 3.605020  | 0.713149  | 4.683267  |
| C | 3.444547  | 1.075032  | -3.602194 |
| H | 3.700278  | 1.734821  | -4.443248 |
| H | 2.647969  | 0.391725  | -3.915998 |
| H | 4.343271  | 0.499631  | -3.340582 |
| C | 2.924899  | 1.874275  | -2.424206 |

O 1.793976 1.672310 -1.988386  
N 3.744745 2.812474 -1.886189  
C 3.227741 3.704947 -0.866589  
H 2.378969 3.231234 -0.361681  
H 4.017440 3.917753 -0.132945  
H 2.895359 4.660049 -1.308037  
C 5.056337 3.143888 -2.406327  
H 5.459366 2.329215 -3.015032  
H 5.027533 4.062577 -3.015476  
H 5.745346 3.307435 -1.565104

-----  
PCMopt\_microsolv/16\_TS\_SSa-mono\_solv

Frequencies, energies and thermodynamic properties:

Lowest Vibrational Mode (1/cm) = -223.5684  
2nd Lowest Vibrational Mode (1/cm) = 15.6617  
E(RM062X) (a.u.) = -2707.51956416  
Thermal correction to Enthalpy (a.u.) = 0.775051  
Thermal correction to Gibbs Free Energy (a.u.) = 0.645472  
Total Entropy (cal/Kmol) = 272.720  
Esp(RM062X+D3) (a.u.) = -2710.26049691  
Esp(D3) (a.u.) = -0.0124637728  
Esp(RM062X) (a.u.) = -2710.2480331372  
Esp(RM062X+D3) SMD (a.u.) = -2710.28151947  
Esp(RM062X) SMD (a.u.) = -2710.2690556972

Optimised cartesian coordinates (Angstrom):

C 5.900388 -1.186305 2.070765  
C 5.745385 -2.455020 1.494928  
C 4.573292 -2.794202 0.825213  
C 3.562819 -1.837499 0.749946  
C 3.711214 -0.582133 1.342074  
H 6.554539 -3.182307 1.564407  
H 4.448757 -3.774975 0.364631  
C 1.622474 -0.346995 0.412450  
C 0.163784 1.619127 0.670894  
C 0.938677 1.782004 1.988682  
C 2.420833 1.536323 1.757013  
H 2.969047 1.540448 2.707767

|   |           |           |           |
|---|-----------|-----------|-----------|
| S | 2.004709  | -1.991520 | -0.036816 |
| N | 2.574131  | 0.209212  | 1.168053  |
| N | 0.505877  | 0.306831  | 0.063205  |
| C | 0.649911  | 3.110932  | 2.722091  |
| C | 1.572128  | 4.267049  | 2.323100  |
| C | 0.708704  | 2.893644  | 4.235440  |
| H | -0.384773 | 3.394228  | 2.466726  |
| H | 2.602279  | 4.083944  | 2.666957  |
| H | 1.596621  | 4.440057  | 1.238410  |
| H | 1.229814  | 5.193605  | 2.805255  |
| H | -0.024184 | 2.141814  | 4.560299  |
| H | 1.708936  | 2.551296  | 4.545001  |
| H | 0.499331  | 3.831468  | 4.769027  |
| H | 0.573281  | 0.963009  | 2.630296  |
| H | -0.894894 | 1.523614  | 0.950629  |
| C | 0.336195  | 2.762366  | -0.305709 |
| C | -0.633745 | 3.770341  | -0.343963 |
| C | 1.465072  | 2.867296  | -1.124893 |
| C | -0.463391 | 4.887804  | -1.159568 |
| H | -1.533086 | 3.675959  | 0.269398  |
| C | 1.631434  | 3.984545  | -1.945739 |
| H | 2.223053  | 2.078148  | -1.137129 |
| C | 0.675647  | 5.000599  | -1.958322 |
| H | -1.225223 | 5.668422  | -1.176287 |
| H | 2.516669  | 4.057873  | -2.579685 |
| H | 0.810957  | 5.873369  | -2.598794 |
| C | -1.660505 | 0.368937  | -1.091557 |
| H | -1.709562 | 1.447815  | -0.983741 |
| C | -2.797699 | -0.331506 | -1.410122 |
| C | -3.877535 | 0.399558  | -2.156621 |
| F | -3.552399 | 0.495428  | -3.455067 |
| F | -5.067387 | -0.200492 | -2.114441 |
| F | -4.045041 | 1.650623  | -1.712129 |
| O | -0.299491 | -1.555948 | -0.987707 |
| C | -0.499993 | -0.383241 | -0.706159 |
| H | 2.873142  | 2.282909  | 1.086583  |
| C | 4.887776  | -0.232877 | 2.006137  |

|   |           |           |           |
|---|-----------|-----------|-----------|
| H | 5.019764  | 0.752806  | 2.450894  |
| H | 6.831113  | -0.936417 | 2.580635  |
| H | -2.734579 | -1.396703 | -1.647980 |
| C | -4.233894 | 2.705641  | 1.334313  |
| H | -5.069792 | 2.654155  | 2.044234  |
| H | -3.440132 | 3.342312  | 1.740017  |
| H | -4.603152 | 3.118440  | 0.384862  |
| C | -4.521003 | 0.455050  | 0.764046  |
| O | -3.660227 | 1.426191  | 1.130335  |
| O | -5.710530 | 0.675222  | 0.636996  |
| C | -2.661721 | -1.254791 | 1.172147  |
| O | -1.734724 | -0.565285 | 1.598939  |
| C | -3.885665 | -0.832615 | 0.521648  |
| C | -3.865920 | -3.205598 | 0.602336  |
| C | -4.086658 | -4.575960 | 0.464528  |
| C | -2.660305 | -2.746977 | 1.138258  |
| C | -3.090935 | -5.461343 | 0.883953  |
| H | -5.019590 | -4.953905 | 0.041336  |
| C | -1.660224 | -3.622844 | 1.558529  |
| C | -1.885997 | -4.991607 | 1.427547  |
| H | -3.251407 | -6.536598 | 0.787008  |
| H | -0.725834 | -3.231309 | 1.966010  |
| H | -1.124045 | -5.705844 | 1.744016  |
| C | -4.756520 | -2.040552 | 0.245815  |
| H | -5.666354 | -2.026914 | 0.869162  |
| H | -5.099942 | -2.102557 | -0.798231 |
| O | 3.744746  | 0.619847  | -1.508235 |
| C | 3.520396  | -0.279888 | -2.317387 |
| C | 2.208322  | -0.323452 | -3.076989 |
| H | 1.651558  | -1.249300 | -2.876901 |
| H | 1.602466  | 0.531630  | -2.753957 |
| H | 2.377111  | -0.248921 | -4.160468 |
| N | 4.429261  | -1.256890 | -2.550266 |
| C | 5.725626  | -1.190597 | -1.900291 |
| H | 5.646133  | -0.601171 | -0.980013 |
| H | 6.059530  | -2.207071 | -1.651999 |
| H | 6.475798  | -0.727998 | -2.562970 |



C 4.256484 -2.339752 -3.496886  
H 3.266030 -2.310456 -3.957985  
H 5.014057 -2.279910 -4.293979  
H 4.372467 -3.307736 -2.985118

-----  
PCMopt\_microsolv/9\_TS\_SRa-bi\_solv

Frequencies, energies and thermodynamic properties:

Lowest Vibrational Mode (1/cm) = -244.2795  
2nd Lowest Vibrational Mode (1/cm) = 20.9365  
E(RM062X) (a.u.) = -2842.74958210  
Thermal correction to Enthalpy (a.u.) = 0.890184  
Thermal correction to Gibbs Free Energy (a.u.) = 0.747027  
Total Entropy (cal/Kmol) = 301.300  
Esp(RM062X+D3) (a.u.) = -2845.65828958  
Esp(D3) (a.u.) = -0.0150754968  
Esp(RM062X) (a.u.) = -2845.6432140832  
Esp(RM062X+D3) SMD (a.u.) = -2845.67609581  
Esp(RM062X) SMD (a.u.) = -2845.6610203132

Optimised cartesian coordinates (Angstrom):

C 5.708112 -0.174178 0.244763  
C 5.736110 -0.388157 -1.140945  
C 4.563626 -0.345913 -1.889554  
C 3.368003 -0.094394 -1.218439  
C 3.338398 0.080207 0.165986  
H 6.686681 -0.580450 -1.639096  
H 4.577075 -0.497545 -2.969954  
C 1.104024 0.287308 -0.310529  
C -0.690967 0.494762 1.358476  
C 0.316983 -0.255281 2.241357  
C 1.709057 0.325228 2.062225  
H 2.444142 -0.290813 2.592633  
S 1.760181 -0.002345 -1.905415  
N 2.039485 0.248724 0.640826  
N -0.189216 0.514083 -0.042307  
C -0.114959 -0.365774 3.719432  
C 0.366008 0.787488 4.605116  
C 0.358174 -1.702659 4.293983

|   |           |           |           |
|---|-----------|-----------|-----------|
| H | -1.217869 | -0.367318 | 3.727031  |
| H | 1.460984  | 0.760335  | 4.722201  |
| H | 0.086438  | 1.773764  | 4.209045  |
| H | -0.070314 | 0.690302  | 5.609613  |
| H | -0.097318 | -2.546717 | 3.756600  |
| H | 1.450108  | -1.803248 | 4.198146  |
| H | 0.093259  | -1.785567 | 5.357961  |
| H | 0.364406  | -1.277487 | 1.832723  |
| H | -1.596241 | -0.127883 | 1.323829  |
| C | -1.058047 | 1.873913  | 1.859451  |
| C | -2.239078 | 2.014765  | 2.599265  |
| C | -0.233838 | 2.986478  | 1.659489  |
| C | -2.571020 | 3.243735  | 3.168308  |
| H | -2.900652 | 1.150702  | 2.707025  |
| C | -0.573327 | 4.217326  | 2.225666  |
| H | 0.676575  | 2.905180  | 1.057481  |
| C | -1.733921 | 4.346662  | 2.989424  |
| H | -3.490709 | 3.343356  | 3.747113  |
| H | 0.075969  | 5.080172  | 2.067069  |
| H | -1.993447 | 5.309040  | 3.433387  |
| C | -2.514303 | 0.747984  | -0.781663 |
| H | -2.783533 | 1.258174  | 0.139576  |
| C | -3.487016 | 0.160583  | -1.557543 |
| C | -4.860425 | 0.761163  | -1.588899 |
| F | -4.820834 | 1.998262  | -2.107523 |
| F | -5.705219 | 0.066155  | -2.357339 |
| F | -5.416963 | 0.880161  | -0.378844 |
| O | -0.742591 | 0.161187  | -2.230786 |
| C | -1.149455 | 0.453462  | -1.111893 |
| H | 1.783549  | 1.372404  | 2.392903  |
| C | 4.513113  | 0.062580  | 0.918352  |
| H | 4.498797  | 0.220612  | 1.996486  |
| H | 6.640537  | -0.194616 | 0.810451  |
| H | -3.199169 | -0.297463 | -2.507475 |
| C | -1.102686 | -3.255104 | -2.405011 |
| H | -0.652790 | -3.935580 | -1.668651 |
| H | -1.163391 | -3.748418 | -3.380589 |

H -0.487545 -2.345347 -2.471998  
C -2.570807 -2.252887 -0.873087  
O -2.432759 -2.923167 -2.040114  
O -1.600787 -1.990488 -0.182127  
C -5.099156 -2.580569 -1.270091  
C -4.318190 -1.418568 0.713543  
C -6.330633 -2.182508 -0.424495  
H -5.233270 -2.331671 -2.333056  
C -5.778298 -1.794502 0.950187  
H -7.068560 -2.993732 -0.370862  
H -5.770636 -2.650924 1.645883  
C -3.939310 -1.847451 -0.625096  
O -3.619287 -0.855491 1.548998  
H -4.930305 -3.670564 -1.223675  
H -6.830583 -1.318136 -0.879464  
H -6.317198 -0.976335 1.447839  
C 0.802550 3.338096 -1.999883  
H 0.686159 4.307640 -2.504541  
H 0.110968 3.296889 -1.150023  
H 0.539553 2.544754 -2.713372  
C 2.211644 3.170244 -1.463427  
O 2.410024 3.043826 -0.255985  
N 3.236889 3.159919 -2.349379  
C 4.599579 3.047770 -1.861652  
H 4.600133 2.571484 -0.874667  
H 5.184978 2.433832 -2.559515  
H 5.075072 4.039589 -1.785352  
C 3.091642 3.284066 -3.785115  
H 3.420903 2.358349 -4.284575  
H 2.053361 3.479553 -4.065107  
H 3.710894 4.114112 -4.157742  
C 4.846502 -3.166167 2.146436  
H 4.609428 -2.838982 3.163785  
H 5.697359 -2.583821 1.768583  
H 5.139792 -4.225200 2.162985  
C 3.609715 -2.960109 1.295662  
O 2.583354 -2.499638 1.787617

N 3.684890 -3.307302 -0.015929  
C 2.487693 -3.288955 -0.832711  
H 1.716995 -2.680572 -0.346014  
H 2.717771 -2.864143 -1.820700  
H 2.097564 -4.310649 -0.977346  
C 4.847145 -3.914599 -0.632461  
H 5.756319 -3.702058 -0.062503  
H 4.730672 -5.007445 -0.724380  
H 4.977528 -3.495318 -1.640755

-----

PCMopt\_microsolv/9\_TS\_SRa-mono\_solv

Frequencies, energies and thermodynamic properties:

Lowest Vibrational Mode (1/cm) = -253.7547  
2nd Lowest Vibrational Mode (1/cm) = 18.9387  
E(RM062X) (a.u.) = -2555.24668579  
Thermal correction to Enthalpy (a.u.) = 0.748835  
Thermal correction to Gibbs Free Energy (a.u.) = 0.625672  
Total Entropy (cal/Kmol) = 259.218  
Esp(RM062X+D3) (a.u.) = -2557.82359352  
Esp(D3) (a.u.) = -0.0115510859  
Esp(RM062X) (a.u.) = -2557.8120424341  
Esp(RM062X+D3) SMD (a.u.) = -2557.84079666  
Esp(RM062X) SMD (a.u.) = -2557.8292455741

Optimised cartesian coordinates (Angstrom):

C -5.933502 0.057697 -2.090858  
C -5.999186 -1.327445 -1.886687  
C -4.893931 -2.030572 -1.415599  
C -3.725863 -1.316401 -1.156336  
C -3.656205 0.059934 -1.380872  
H -6.927976 -1.860359 -2.091280  
H -4.940398 -3.106694 -1.244262  
C -1.542506 -0.322719 -0.563852  
C 0.229558 1.372446 -0.361230  
C -0.507059 2.002071 -1.553677  
C -2.009301 1.960274 -1.322569  
H -2.552944 2.300052 -2.213623  
S -2.202454 -1.941575 -0.557391

|   |           |           |           |
|---|-----------|-----------|-----------|
| N | -2.392153 | 0.571143  | -1.080872 |
| N | -0.327466 | 0.013830  | -0.115178 |
| C | 0.015337  | 3.405439  | -1.933526 |
| C | -0.685214 | 4.559481  | -1.210089 |
| C | -0.078107 | 3.604465  | -3.447665 |
| H | 1.083176  | 3.425004  | -1.659307 |
| H | -1.730983 | 4.654379  | -1.542751 |
| H | -0.680157 | 4.444104  | -0.117456 |
| H | -0.181388 | 5.505983  | -1.452398 |
| H | 0.508582  | 2.847513  | -3.987026 |
| H | -1.122890 | 3.533908  | -3.789986 |
| H | 0.297651  | 4.597613  | -3.731827 |
| H | -0.292364 | 1.330095  | -2.401328 |
| H | 1.263022  | 1.196462  | -0.692580 |
| C | 0.252565  | 2.230651  | 0.884362  |
| C | 1.395980  | 3.001022  | 1.132965  |
| C | -0.841417 | 2.320393  | 1.750947  |
| C | 1.426619  | 3.885521  | 2.210440  |
| H | 2.266980  | 2.881372  | 0.482310  |
| C | -0.803532 | 3.202741  | 2.833083  |
| H | -1.728063 | 1.697555  | 1.597772  |
| C | 0.322656  | 3.994874  | 3.058260  |
| H | 2.319040  | 4.485812  | 2.394554  |
| H | -1.661882 | 3.268627  | 3.503926  |
| H | 0.346644  | 4.686010  | 3.902260  |
| C | 1.799224  | -0.576881 | 0.929247  |
| H | 1.937185  | 0.455623  | 1.235630  |
| C | 2.894366  | -1.411631 | 0.877929  |
| C | 4.003416  | -1.124973 | 1.850379  |
| F | 3.698646  | -1.638635 | 3.051834  |
| F | 5.185211  | -1.648451 | 1.513602  |
| F | 4.194348  | 0.186489  | 2.031684  |
| O | 0.205860  | -2.184246 | 0.238872  |
| C | 0.565928  | -1.019072 | 0.354191  |
| H | -2.320548 | 2.576228  | -0.465223 |
| C | -4.763165 | 0.771177  | -1.845029 |
| H | -4.722095 | 1.848579  | -2.001106 |

H -6.813857 0.591482 -2.449636  
H 2.764466 -2.475178 0.659355  
C 1.387060 -3.139945 -2.765434  
H 1.186807 -2.573138 -3.684936  
H 1.508321 -4.202673 -2.999040  
H 0.550601 -2.993967 -2.066857  
C 2.662019 -1.419340 -1.804758  
O 2.603143 -2.720419 -2.166996  
O 1.725085 -0.667637 -2.011190  
C 5.118456 -1.960619 -1.267991  
C 4.255551 0.292979 -0.887503  
C 6.329112 -1.008377 -1.060943  
H 5.135339 -2.800115 -0.556054  
C 5.766514 0.369748 -0.676758  
H 6.908828 -0.936592 -1.991182  
H 6.167667 1.196859 -1.280327  
C 3.888597 -1.094573 -1.105097  
O 3.509478 1.264345 -0.816880  
H 5.137556 -2.413400 -2.270747  
H 7.008493 -1.393194 -0.290112  
H 5.950461 0.629459 0.377074  
C -1.999724 -1.146824 2.817765  
H -1.282981 -0.327605 2.685032  
H -1.604020 -2.049578 2.331399  
H -2.107503 -1.353426 3.891800  
C -3.320337 -0.714326 2.209464  
O -3.434748 0.393679 1.687018  
N -4.360226 -1.581835 2.251766  
C -5.655851 -1.163767 1.748331  
H -5.523589 -0.351482 1.025157  
H -6.145158 -2.013695 1.253450  
H -6.304679 -0.816626 2.569552  
C -4.319020 -2.894048 2.863787  
H -3.317279 -3.129844 3.231763  
H -5.022689 -2.947885 3.709322  
H -4.607806 -3.660817 2.128206

---

PCMopt\_microsolv/9\_TS\_SSa-bi\_solv

Frequencies, energies and thermodynamic properties:

|                                                  |                  |
|--------------------------------------------------|------------------|
| Lowest Vibrational Mode (1/cm) =                 | -220.2911        |
| 2nd Lowest Vibrational Mode (1/cm) =             | 14.4837          |
| E(RM062X) (a.u.) =                               | -2842.74486984   |
| Thermal correction to Enthalpy (a.u.) =          | 0.889882         |
| Thermal correction to Gibbs Free Energy (a.u.) = | 0.743836         |
| Total Entropy (cal/Kmol) =                       | 307.378          |
| Esp(RM062X+D3) (a.u.) =                          | -2845.65681971   |
| Esp(D3) (a.u.) =                                 | -0.0151723652    |
| Esp(RM062X) (a.u.) =                             | -2845.6416473448 |
| Esp(RM062X+D3) SMD (a.u.) =                      | -2845.67543947   |
| Esp(RM062X) SMD (a.u.) =                         | -2845.6602671048 |

Optimised cartesian coordinates (Angstrom):

|   |           |           |           |
|---|-----------|-----------|-----------|
| C | -5.676620 | 0.359887  | 0.279222  |
| C | -5.680412 | 0.847179  | -1.035852 |
| C | -4.506484 | 0.884967  | -1.782152 |
| C | -3.333037 | 0.436057  | -1.178107 |
| C | -3.325657 | -0.014263 | 0.142714  |
| H | -6.613796 | 1.191237  | -1.482079 |
| H | -4.501827 | 1.249135  | -2.810557 |
| C | -1.101429 | -0.241947 | -0.371396 |
| C | 0.674416  | -0.833894 | 1.226860  |
| C | -0.325664 | -0.272445 | 2.248620  |
| C | -1.730476 | -0.755251 | 1.934930  |
| H | -2.450556 | -0.252310 | 2.589986  |
| S | -1.729378 | 0.381097  | -1.878619 |
| N | -2.042148 | -0.349389 | 0.568017  |
| N | 0.181354  | -0.566515 | -0.149977 |
| C | 0.084222  | -0.509555 | 3.718220  |
| C | -0.434689 | -1.821296 | 4.314997  |
| C | -0.369391 | 0.673689  | 4.575431  |
| H | 1.186542  | -0.538080 | 3.743159  |
| H | -1.530714 | -1.796310 | 4.420794  |
| H | -0.167363 | -2.699946 | 3.711563  |
| H | -0.014801 | -1.961685 | 5.321292  |
| H | 0.101526  | 1.608646  | 4.240445  |

|   |           |           |           |
|---|-----------|-----------|-----------|
| H | -1.458836 | 0.811838  | 4.503567  |
| H | -0.108819 | 0.511175  | 5.631173  |
| H | -0.341222 | 0.815293  | 2.076899  |
| H | 1.577550  | -0.214177 | 1.320961  |
| C | 1.025407  | -2.293368 | 1.419053  |
| C | 2.194931  | -2.624645 | 2.112028  |
| C | 0.182344  | -3.316963 | 0.972553  |
| C | 2.503619  | -3.955747 | 2.388734  |
| H | 2.873119  | -1.830735 | 2.434726  |
| C | 0.495185  | -4.649994 | 1.245634  |
| H | -0.725314 | -3.084490 | 0.407080  |
| C | 1.649031  | -4.972658 | 1.960850  |
| H | 3.417029  | -4.199099 | 2.933314  |
| H | -0.170233 | -5.440830 | 0.895229  |
| H | 1.888803  | -6.015394 | 2.174208  |
| C | 2.523231  | -0.611603 | -0.889607 |
| H | 2.819927  | -1.174357 | -0.010351 |
| C | 3.474946  | 0.053083  | -1.619075 |
| C | 4.887029  | -0.453409 | -1.563811 |
| F | 5.025047  | -1.519627 | -2.368625 |
| F | 5.796245  | 0.434989  | -1.964828 |
| F | 5.233407  | -0.857277 | -0.335850 |
| O | 0.738755  | 0.079333  | -2.269359 |
| C | 1.145409  | -0.337183 | -1.192675 |
| H | -1.841806 | -1.847299 | 2.017779  |
| C | -4.503790 | -0.078125 | 0.887531  |
| H | -4.509380 | -0.449219 | 1.912096  |
| H | -6.610935 | 0.322449  | 0.840939  |
| H | 3.209738  | 0.520898  | -2.570312 |
| C | 4.627421  | 0.621946  | 2.502358  |
| H | 5.160559  | 1.460487  | 2.969624  |
| H | 3.912723  | 0.194789  | 3.214811  |
| H | 5.363223  | -0.137839 | 2.202396  |
| C | 4.567078  | 1.732570  | 0.442711  |
| O | 3.873204  | 1.055256  | 1.385137  |
| O | 5.756590  | 1.953129  | 0.578989  |
| C | 4.377354  | 3.016322  | -1.772390 |



C 2.344198 2.377350 -0.634626  
C 3.278964 4.052504 -2.086041  
H 5.316661 3.474316 -1.432570  
C 1.972791 3.318471 -1.781188  
H 3.335898 4.436835 -3.113473  
H 1.648744 2.689755 -2.629354  
C 3.767083 2.130410 -0.705735  
O 1.519443 1.876413 0.127719  
H 4.621502 2.438817 -2.681302  
H 3.379301 4.909702 -1.402361  
H 1.127340 3.962684 -1.502680  
C -0.987387 -2.933473 -2.650255  
H -0.948651 -3.787944 -3.340558  
H -0.268661 -3.100786 -1.839376  
H -0.695652 -2.029313 -3.202163  
C -2.365478 -2.796164 -2.031498  
O -2.516180 -2.892976 -0.814090  
N -3.416413 -2.561850 -2.853878  
C -4.754131 -2.479049 -2.296050  
H -4.697178 -2.190962 -1.240229  
H -5.329478 -1.722248 -2.846298  
H -5.278072 -3.445586 -2.379191  
C -3.326827 -2.424581 -4.292933  
H -3.653354 -1.417909 -4.599865  
H -2.303739 -2.579518 -4.644624  
H -3.977973 -3.161883 -4.787043  
C -4.639613 2.833474 2.756981  
H -4.880783 3.883057 2.975718  
H -4.430301 2.305838 3.692969  
H -5.513925 2.377108 2.273427  
C -3.406088 2.729488 1.882725  
O -2.417142 2.113414 2.270116  
N -3.443118 3.342471 0.670978  
C -2.240975 3.418373 -0.135931  
H -1.505277 2.687065 0.217136  
H -2.486300 3.209709 -1.187485  
H -1.795338 4.425863 -0.078781

|   |           |          |           |
|---|-----------|----------|-----------|
| C | -4.561880 | 4.129829 | 0.192832  |
| H | -5.491641 | 3.845445 | 0.694447  |
| H | -4.390564 | 5.209098 | 0.342094  |
| H | -4.692819 | 3.946875 | -0.883574 |

-----  
PCMopt\_microsolv/9\_TS\_SSa-mono\_solv

Frequencies, energies and thermodynamic properties:

|                                                  |                  |
|--------------------------------------------------|------------------|
| Lowest Vibrational Mode (1/cm) =                 | -200.7281        |
| 2nd Lowest Vibrational Mode (1/cm) =             | 16.2944          |
| E(RM062X) (a.u.) =                               | -2555.24239667   |
| Thermal correction to Enthalpy (a.u.) =          | 0.748426         |
| Thermal correction to Gibbs Free Energy (a.u.) = | 0.623960         |
| Total Entropy (cal/Kmol) =                       | 261.962          |
| Esp(RM062X+D3) (a.u.) =                          | -2557.82352157   |
| Esp(D3) (a.u.) =                                 | -0.0115924336    |
| Esp(RM062X) (a.u.) =                             | -2557.8119291364 |
| Esp(RM062X+D3) SMD (a.u.) =                      | -2557.84206056   |
| Esp(RM062X) SMD (a.u.) =                         | -2557.8304681264 |

Optimised cartesian coordinates (Angstrom):

|   |           |           |           |
|---|-----------|-----------|-----------|
| C | -5.904449 | -0.062537 | -2.209627 |
| C | -5.940652 | -1.449395 | -2.008032 |
| C | -4.831034 | -2.125482 | -1.509329 |
| C | -3.687326 | -1.382643 | -1.221862 |
| C | -3.646441 | -0.005035 | -1.443887 |
| H | -6.850547 | -2.004806 | -2.236318 |
| H | -4.855327 | -3.202504 | -1.339102 |
| C | -1.542535 | -0.338617 | -0.581803 |
| C | 0.193233  | 1.394192  | -0.359807 |
| C | -0.548629 | 2.018599  | -1.552595 |
| C | -2.050879 | 1.935221  | -1.335695 |
| H | -2.592313 | 2.272856  | -2.228561 |
| S | -2.167233 | -1.969463 | -0.578143 |
| N | -2.401952 | 0.535328  | -1.114068 |
| N | -0.337407 | 0.026140  | -0.120725 |
| C | -0.065530 | 3.441497  | -1.912218 |
| C | -0.803829 | 4.565411  | -1.178681 |
| C | -0.157280 | 3.655542  | -3.424387 |

|   |           |           |           |
|---|-----------|-----------|-----------|
| H | 1.000102  | 3.492977  | -1.633245 |
| H | -1.849036 | 4.635731  | -1.518581 |
| H | -0.804311 | 4.436232  | -0.087606 |
| H | -0.324696 | 5.528520  | -1.404547 |
| H | 0.454406  | 2.923192  | -3.969707 |
| H | -1.197773 | 3.558035  | -3.772747 |
| H | 0.189697  | 4.662978  | -3.694048 |
| H | -0.308070 | 1.361489  | -2.404804 |
| H | 1.227478  | 1.231160  | -0.695352 |
| C | 0.186177  | 2.237455  | 0.896948  |
| C | 1.293736  | 3.047333  | 1.172149  |
| C | -0.917023 | 2.272060  | 1.756005  |
| C | 1.287620  | 3.909363  | 2.267494  |
| H | 2.171271  | 2.997622  | 0.523333  |
| C | -0.919448 | 3.131967  | 2.856275  |
| H | -1.782476 | 1.625569  | 1.581716  |
| C | 0.175486  | 3.958552  | 3.109427  |
| H | 2.156192  | 4.538305  | 2.467589  |
| H | -1.785881 | 3.152597  | 3.519445  |
| H | 0.168449  | 4.630878  | 3.968588  |
| C | 1.812448  | -0.533124 | 0.922189  |
| H | 2.001475  | 0.514690  | 1.133958  |
| C | 2.843449  | -1.430789 | 0.979773  |
| C | 4.026060  | -1.101273 | 1.842899  |
| F | 3.744228  | -1.367900 | 3.128890  |
| F | 5.120159  | -1.803181 | 1.549322  |
| F | 4.350892  | 0.195496  | 1.786999  |
| O | 0.191212  | -2.149199 | 0.336129  |
| C | 0.557815  | -0.984037 | 0.381916  |
| H | -2.386618 | 2.532404  | -0.474286 |
| C | -4.759130 | 0.679680  | -1.934308 |
| H | -4.742161 | 1.758025  | -2.088416 |
| H | -6.788695 | 0.449453  | -2.589900 |
| H | 2.649586  | -2.501503 | 0.879956  |
| C | 4.564928  | 2.111594  | -0.839718 |
| H | 5.402487  | 2.182286  | -1.546033 |
| H | 3.843297  | 2.911353  | -1.041395 |

|   |           |           |           |
|---|-----------|-----------|-----------|
| H | 4.958915  | 2.207234  | 0.182421  |
| C | 4.632921  | -0.225905 | -0.954108 |
| O | 3.867625  | 0.889233  | -0.993770 |
| O | 5.838838  | -0.151679 | -0.801759 |
| C | 4.615969  | -2.781025 | -1.210443 |
| C | 2.611874  | -1.554701 | -1.772983 |
| C | 3.844786  | -3.552853 | -2.300773 |
| H | 5.677588  | -2.637044 | -1.455432 |
| C | 2.419006  | -3.008163 | -2.209713 |
| H | 3.906320  | -4.642507 | -2.176445 |
| H | 1.836856  | -3.514097 | -1.419217 |
| C | 3.881531  | -1.462076 | -1.094992 |
| O | 1.755007  | -0.683272 | -1.917125 |
| H | 4.588132  | -3.340951 | -0.259040 |
| H | 4.263549  | -3.305196 | -3.288516 |
| H | 1.835084  | -3.064720 | -3.138560 |
| C | -2.096857 | -1.194225 | 2.803282  |
| H | -2.240772 | -1.391557 | 3.874869  |
| H | -1.373864 | -0.377725 | 2.688390  |
| H | -1.686833 | -2.100768 | 2.337067  |
| C | -3.395980 | -0.763113 | 2.149931  |
| O | -3.493814 | 0.345588  | 1.624787  |
| N | -4.435637 | -1.631233 | 2.155959  |
| C | -5.713456 | -1.213744 | 1.608052  |
| H | -5.556472 | -0.410308 | 0.879772  |
| H | -6.190461 | -2.067736 | 1.108459  |
| H | -6.385718 | -0.854454 | 2.404788  |
| C | -4.414388 | -2.943950 | 2.768249  |
| H | -4.665051 | -3.712076 | 2.020153  |
| H | -3.429237 | -3.173822 | 3.181875  |
| H | -5.155366 | -3.001831 | 3.580856  |

-----

SMDopt/16\_TS\_SRa

Frequencies, energies and thermodynamic properties:

|                                      |                |
|--------------------------------------|----------------|
| Lowest Vibrational Mode (1/cm) =     | -156.9758      |
| 2nd Lowest Vibrational Mode (1/cm) = | 17.3388        |
| E(RM062X) (a.u.) =                   | -2420.02976858 |

|                                                  |                  |
|--------------------------------------------------|------------------|
| Thermal correction to Enthalpy (a.u.) =          | 0.632386         |
| Thermal correction to Gibbs Free Energy (a.u.) = | 0.522495         |
| Total Entropy (cal/Kmol) =                       | 231.286          |
| Esp(RM062X+D3) (a.u.) =                          | -2422.44726399   |
| Esp(D3) (a.u.) =                                 | -0.0095321619    |
| Esp(RM062X) (a.u.) =                             | -2422.4377318281 |
| Esp(RM062X+D3) PCM (a.u.) =                      | -2422.42738533   |
| Esp(RM062X) PCM (a.u.) =                         | -2422.4178531681 |
| Esp(RM062X+D3) GAS (a.u.) =                      | -2422.37687640   |
| Esp(RM062X) GAS (a.u.) =                         | -2422.3673442381 |

Optimised cartesian coordinates (Angstrom):

|   |          |           |           |
|---|----------|-----------|-----------|
| C | 6.440800 | -2.226353 | -0.671249 |
| C | 5.933964 | -3.270014 | -1.460395 |
| C | 4.582272 | -3.331212 | -1.781416 |
| C | 3.749448 | -2.325622 | -1.289190 |
| C | 4.254899 | -1.294353 | -0.496223 |
| H | 6.608380 | -4.042580 | -1.831663 |
| H | 4.183986 | -4.137201 | -2.399380 |
| C | 2.038780 | -0.689203 | -0.585915 |
| C | 1.082287 | 1.301091  | 0.501422  |
| C | 2.256912 | 1.133967  | 1.478783  |
| C | 3.523492 | 0.769262  | 0.730961  |
| H | 4.317406 | 0.491702  | 1.435274  |
| S | 2.027504 | -2.138604 | -1.555051 |
| N | 3.252381 | -0.398852 | -0.110868 |
| N | 0.959743 | 0.082693  | -0.339018 |
| C | 2.447172 | 2.331508  | 2.436706  |
| C | 3.382743 | 3.422387  | 1.908770  |
| C | 2.947392 | 1.828894  | 3.791426  |
| H | 1.450256 | 2.775984  | 2.591496  |
| H | 4.424761 | 3.066130  | 1.882367  |
| H | 3.115121 | 3.768713  | 0.900327  |
| H | 3.352706 | 4.291844  | 2.581743  |
| H | 2.231276 | 1.130850  | 4.249923  |
| H | 3.910940 | 1.305697  | 3.681843  |
| H | 3.099401 | 2.668178  | 4.485874  |
| H | 1.991246 | 0.261503  | 2.094209  |

H 0.177377 1.328980 1.122565  
C 1.141416 2.553512 -0.349799  
C 0.457677 3.697682 0.077624  
C 1.905749 2.612360 -1.519948  
C 0.564060 4.891809 -0.633298  
H -0.161675 3.649842 0.977035  
C 2.011321 3.807766 -2.232274  
H 2.426067 1.725915 -1.892086  
C 1.347990 4.951109 -1.786657  
H 0.028056 5.777684 -0.288406  
H 2.613474 3.842617 -3.141733  
H 1.431684 5.885052 -2.345027  
C -1.414485 0.644494 -0.732946  
H -1.291638 1.614681 -0.258245  
C -2.647527 0.236309 -1.136467  
C -3.728233 1.273340 -1.232804  
F -3.450527 2.141343 -2.223411  
F -4.925024 0.761620 -1.519492  
F -3.847322 2.002724 -0.121488  
O -0.338233 -1.236980 -1.663703  
C -0.288517 -0.246578 -0.962002  
H 3.891382 1.582746 0.087746  
C 5.613229 -1.223572 -0.178394  
H 6.015114 -0.411061 0.426049  
H 7.506134 -2.195910 -0.439354  
H -2.793268 -0.667213 -1.731394  
C -7.089827 -1.264249 -0.407094  
H -7.239868 -0.220922 -0.721681  
H -7.451293 -1.941910 -1.189764  
H -7.663124 -1.430904 0.517045  
C -5.076912 -0.772897 0.672066  
O -5.719384 -1.550078 -0.226697  
O -5.680085 0.059975 1.328162  
C -2.966661 -2.212629 0.297981  
O -3.281736 -3.054669 -0.537602  
C -3.658006 -1.028351 0.770571  
C -1.600465 -1.153048 1.931910

C -0.462898 -0.967303 2.721618  
C -1.661940 -2.227514 1.042141  
C 0.593283 -1.874105 2.601689  
H -0.399353 -0.133581 3.426295  
C -0.606195 -3.128483 0.908096  
C 0.527827 -2.945660 1.697091  
H 1.483988 -1.751090 3.222364  
H -0.677752 -3.946444 0.187733  
H 1.371612 -3.634582 1.616208  
C -2.875920 -0.351708 1.866660  
H -2.658399 0.710372 1.650946  
H -3.408328 -0.367285 2.833294

-----  
SMDopt/16\_TS\_SRb

Frequencies, energies and thermodynamic properties:

Lowest Vibrational Mode (1/cm) = -166.4626  
2nd Lowest Vibrational Mode (1/cm) = 22.0284  
E(RM062X) (a.u.) = -2420.02965697  
Thermal correction to Enthalpy (a.u.) = 0.632335  
Thermal correction to Gibbs Free Energy (a.u.) = 0.522484  
Total Entropy (cal/Kmol) = 231.200  
Esp(RM062X+D3) (a.u.) = -2422.44643832  
Esp(D3) (a.u.) = -0.0095568599  
Esp(RM062X) (a.u.) = -2422.4368814601

Optimised cartesian coordinates (Angstrom):

C 6.537601 -1.979741 -0.550844  
C 6.095921 -3.038400 -1.358738  
C 4.756289 -3.155213 -1.712785  
C 3.868940 -2.190671 -1.234062  
C 4.309348 -1.144771 -0.421712  
H 6.811971 -3.778036 -1.718890  
H 4.408143 -3.972459 -2.345975  
C 2.071625 -0.635919 -0.562895  
C 1.003858 1.305948 0.506684  
C 2.158089 1.185402 1.514285  
C 3.458480 0.875550 0.800888  
H 4.241397 0.626204 1.527611

|   |           |           |           |
|---|-----------|-----------|-----------|
| S | 2.147855  | -2.076061 | -1.542922 |
| N | 3.259213  | -0.296956 | -0.054858 |
| N | 0.953687  | 0.085393  | -0.337876 |
| C | 2.271965  | 2.389008  | 2.476849  |
| C | 3.171860  | 3.520927  | 1.973306  |
| C | 2.758111  | 1.908470  | 3.844630  |
| H | 1.252711  | 2.788969  | 2.604930  |
| H | 4.229397  | 3.212593  | 1.976616  |
| H | 2.917185  | 3.854786  | 0.957318  |
| H | 3.083632  | 4.388122  | 2.644077  |
| H | 2.061490  | 1.179806  | 4.285119  |
| H | 3.746449  | 1.428399  | 3.761205  |
| H | 2.854639  | 2.753676  | 4.541822  |
| H | 1.912041  | 0.301376  | 2.121437  |
| H | 0.083083  | 1.296627  | 1.104384  |
| C | 1.034970  | 2.559158  | -0.344472 |
| C | 0.292363  | 3.674355  | 0.059593  |
| C | 1.829985  | 2.647500  | -1.492144 |
| C | 0.368191  | 4.870038  | -0.652767 |
| H | -0.349616 | 3.602757  | 0.941370  |
| C | 1.905306  | 3.844258  | -2.205816 |
| H | 2.398413  | 1.782850  | -1.844644 |
| C | 1.181037  | 4.959383  | -1.783922 |
| H | -0.214262 | 5.733393  | -0.326586 |
| H | 2.531257  | 3.902238  | -3.097859 |
| H | 1.240468  | 5.894337  | -2.343698 |
| C | -1.431628 | 0.546905  | -0.787532 |
| H | -1.368428 | 1.506193  | -0.280358 |
| C | -2.632697 | 0.099768  | -1.243534 |
| C | -3.747849 | 1.100836  | -1.338210 |
| F | -3.489430 | 1.985138  | -2.319805 |
| F | -4.927218 | 0.557852  | -1.636333 |
| F | -3.896584 | 1.817343  | -0.221633 |
| O | -0.249343 | -1.270905 | -1.715029 |
| C | -0.261736 | -0.289272 | -0.999611 |
| H | 3.811646  | 1.707234  | 0.172892  |
| C | 5.655594  | -1.017697 | -0.071463 |



|   |           |           |           |
|---|-----------|-----------|-----------|
| H | 6.009086  | -0.193580 | 0.547247  |
| H | 7.594795  | -1.904414 | -0.293254 |
| H | -2.721995 | -0.785540 | -1.875760 |
| C | -6.986755 | 0.003710  | 0.783534  |
| H | -7.589293 | -0.870774 | 1.070897  |
| H | -7.282160 | 0.867806  | 1.390709  |
| H | -7.173487 | 0.217284  | -0.279213 |
| C | -5.042352 | -1.231635 | 0.321707  |
| O | -5.613154 | -0.211248 | 1.024708  |
| O | -5.715507 | -1.940661 | -0.398305 |
| C | -2.816316 | -2.428612 | 0.126768  |
| O | -3.030677 | -3.276219 | -0.734244 |
| C | -3.621124 | -1.308028 | 0.569798  |
| C | -1.624273 | -1.289848 | 1.837806  |
| C | -0.549439 | -1.029767 | 2.692437  |
| C | -1.556655 | -2.357623 | 0.940182  |
| C | 0.574057  | -1.857733 | 2.629658  |
| H | -0.586958 | -0.200748 | 3.404399  |
| C | -0.432383 | -3.179283 | 0.863060  |
| C | 0.637957  | -2.923391 | 1.717771  |
| H | 1.416097  | -1.677109 | 3.301918  |
| H | -0.403780 | -3.995016 | 0.137153  |
| H | 1.532078  | -3.549981 | 1.683482  |
| C | -2.952414 | -0.584587 | 1.713443  |
| H | -3.524150 | -0.657448 | 2.654450  |
| H | -2.804849 | 0.493472  | 1.524637  |

-----  
SMDopt/16\_TS\_SRc

Frequencies, energies and thermodynamic properties:

|                                                  |                |
|--------------------------------------------------|----------------|
| Lowest Vibrational Mode (1/cm) =                 | -166.4605      |
| 2nd Lowest Vibrational Mode (1/cm) =             | 22.0288        |
| E(RM062X) (a.u.) =                               | -2420.02965697 |
| Thermal correction to Enthalpy (a.u.) =          | 0.632335       |
| Thermal correction to Gibbs Free Energy (a.u.) = | 0.522485       |
| Total Entropy (cal/Kmol) =                       | 231.199        |
| Esp(RM062X+D3) (a.u.) =                          | -2422.44643829 |
| Esp(D3) (a.u.) =                                 | -0.0095568523  |

Esp(RM062X) (a.u.) = -2422.4368814377

Optimised cartesian coordinates (Angstrom):

|   |           |           |           |
|---|-----------|-----------|-----------|
| C | 6.537590  | -1.979768 | -0.550852 |
| C | 6.095902  | -3.038429 | -1.358737 |
| C | 4.756268  | -3.155238 | -1.712779 |
| C | 3.868926  | -2.190688 | -1.234059 |
| C | 4.309343  | -1.144785 | -0.421716 |
| H | 6.811946  | -3.778072 | -1.718888 |
| H | 4.408116  | -3.972485 | -2.345964 |
| C | 2.071622  | -0.635923 | -0.562895 |
| C | 1.003867  | 1.305952  | 0.506683  |
| C | 2.158102  | 1.185404  | 1.514279  |
| C | 3.458489  | 0.875546  | 0.800877  |
| H | 4.241408  | 0.626201  | 1.527597  |
| S | 2.147841  | -2.076071 | -1.542915 |
| N | 3.259213  | -0.296963 | -0.054863 |
| N | 0.953688  | 0.085396  | -0.337874 |
| C | 2.271986  | 2.389012  | 2.476840  |
| C | 3.171888  | 3.520924  | 1.973292  |
| C | 2.758134  | 1.908475  | 3.844622  |
| H | 1.252736  | 2.788980  | 2.604922  |
| H | 4.229421  | 3.212579  | 1.976585  |
| H | 2.917201  | 3.854793  | 0.957310  |
| H | 3.083679  | 4.388116  | 2.644070  |
| H | 2.061517  | 1.179806  | 4.285108  |
| H | 3.746475  | 1.428411  | 3.761197  |
| H | 2.854654  | 2.753681  | 4.541815  |
| H | 1.912054  | 0.301379  | 2.121434  |
| H | 0.083094  | 1.296637  | 1.104387  |
| C | 1.034981  | 2.559160  | -0.344475 |
| C | 0.292380  | 3.674362  | 0.059589  |
| C | 1.829992  | 2.647496  | -1.492151 |
| C | 0.368211  | 4.870043  | -0.652773 |
| H | -0.349595 | 3.602768  | 0.941369  |
| C | 1.905315  | 3.844252  | -2.205827 |
| H | 2.398414  | 1.782842  | -1.844652 |
| C | 1.181052  | 4.959381  | -1.783932 |

H -0.214236 5.733401 -0.326592  
H 2.531262 3.902226 -3.097872  
H 1.240485 5.894333 -2.343711  
C -1.431629 0.546915 -0.787522  
H -1.368427 1.506200 -0.280344  
C -2.632697 0.099780 -1.243526  
C -3.747851 1.100846 -1.338195  
F -3.489421 1.985173 -2.319764  
F -4.927213 0.557863 -1.636348  
F -3.896607 1.817325 -0.221603  
O -0.249353 -1.270900 -1.715019  
C -0.261738 -0.289266 -0.999603  
H 3.811653 1.707227 0.172875  
C 5.655591 -1.017717 -0.071473  
H 6.009089 -0.193598 0.547231  
H 7.594786 -1.904445 -0.293266  
H -2.721995 -0.785527 -1.875754  
C -6.986768 0.003697 0.783512  
H -7.589304 -0.870796 1.070854  
H -7.282184 0.867781 1.390700  
H -7.173488 0.217288 -0.279232  
C -5.042356 -1.231638 0.321696  
O -5.613168 -0.211258 1.024698  
O -5.715502 -1.940662 -0.398326  
C -2.816315 -2.428607 0.126771  
O -3.030669 -3.276216 -0.734242  
C -3.621130 -1.308028 0.569798  
C -1.624282 -1.289838 1.837812  
C -0.549449 -1.029749 2.692442  
C -1.556657 -2.357614 0.940189  
C 0.574051 -1.857709 2.629666  
H -0.586973 -0.200728 3.404402  
C -0.432382 -3.179269 0.863070  
C 0.637957 -2.923370 1.717781  
H 1.416091 -1.677078 3.301923  
H -0.403774 -3.995003 0.137165  
H 1.532081 -3.549955 1.683494

C -2.952426 -0.584585 1.713447  
H -2.804868 0.493476 1.524643  
H -3.524164 -0.657453 2.654452

-----

SMDopt/16\_TS\_SRd

Frequencies, energies and thermodynamic properties:

Lowest Vibrational Mode (1/cm) = -272.9820  
2nd Lowest Vibrational Mode (1/cm) = 18.4517  
E(RM062X) (a.u.) = -2420.03797032  
Thermal correction to Enthalpy (a.u.) = 0.632980  
Thermal correction to Gibbs Free Energy (a.u.) = 0.524677  
Total Entropy (cal/Kmol) = 227.943  
Esp(RM062X+D3) (a.u.) = -2422.44741675  
Esp(D3) (a.u.) = -0.0090726637  
Esp(RM062X) (a.u.) = -2422.4383440863

Optimised cartesian coordinates (Angstrom):

C 7.245120 -0.831769 0.513968  
C 7.225472 -2.035131 -0.204597  
C 6.035141 -2.539180 -0.721766  
C 4.867989 -1.808655 -0.504983  
C 4.889667 -0.614594 0.218912  
H 8.154128 -2.584241 -0.364821  
H 6.015328 -3.474354 -1.283095  
C 2.654496 -0.719770 -0.315151  
C 1.010473 1.005604 0.238909  
C 1.885746 1.195287 1.487932  
C 3.356710 1.162450 1.113345  
H 3.987323 1.108620 2.010759  
S 3.237339 -2.210796 -1.019334  
N 3.617289 -0.045446 0.325087  
N 1.405992 -0.260563 -0.425614  
C 1.503091 2.434385 2.327560  
C 2.234194 3.719628 1.931584  
C 1.726956 2.145816 3.812195  
H 0.422112 2.591356 2.175752  
H 3.300408 3.664762 2.203434  
H 2.167260 3.938102 0.856135

|   |           |           |           |
|---|-----------|-----------|-----------|
| H | 1.802919  | 4.573119  | 2.475239  |
| H | 1.118905  | 1.293731  | 4.149702  |
| H | 2.785153  | 1.909638  | 4.009433  |
| H | 1.460192  | 3.020511  | 4.423700  |
| H | 1.681243  | 0.303947  | 2.103118  |
| H | -0.013008 | 0.835185  | 0.601070  |
| C | 1.009593  | 2.174775  | -0.721983 |
| C | -0.049350 | 3.088742  | -0.651326 |
| C | 2.044074  | 2.396147  | -1.637768 |
| C | -0.050964 | 4.229358  | -1.453781 |
| H | -0.879947 | 2.882854  | 0.029749  |
| C | 2.039465  | 3.535714  | -2.443331 |
| H | 2.863282  | 1.678878  | -1.736046 |
| C | 0.998166  | 4.459589  | -2.345417 |
| H | -0.879202 | 4.937431  | -1.388925 |
| H | 2.852854  | 3.700421  | -3.152228 |
| H | 0.997231  | 5.351327  | -2.974829 |
| C | -0.857702 | -0.438279 | -1.319297 |
| H | -0.931701 | 0.646361  | -1.339845 |
| C | -2.010280 | -1.195259 | -1.354601 |
| C | -3.173025 | -0.631516 | -2.118494 |
| F | -2.954378 | -0.756449 | -3.438880 |
| F | -4.332773 | -1.249539 | -1.880025 |
| F | -3.362513 | 0.671385  | -1.889124 |
| O | 0.652903  | -2.262154 | -1.238745 |
| C | 0.381835  | -1.090644 | -1.021011 |
| H | 3.661825  | 2.039743  | 0.523767  |
| C | 6.080112  | -0.103649 | 0.737522  |
| H | 6.100276  | 0.835551  | 1.290030  |
| H | 8.190414  | -0.453537 | 0.905217  |
| H | -1.940635 | -2.284747 | -1.423058 |
| C | -0.435020 | -3.883397 | 1.601635  |
| H | -0.094920 | -3.594454 | 2.606186  |
| H | -0.652524 | -4.957111 | 1.578751  |
| H | 0.352527  | -3.640175 | 0.873144  |
| C | -1.574406 | -1.874891 | 1.203869  |
| O | -1.643032 | -3.221408 | 1.261108  |

O -0.548398 -1.280508 1.477465  
 C -3.036157 0.155394 0.888979  
 O -2.216144 1.064839 0.958744  
 C -2.802945 -1.276278 0.715988  
 C -5.144783 -0.919006 0.867387  
 C -6.536882 -0.997251 0.862981  
 C -4.519966 0.330850 0.912231  
 C -7.276520 0.187337 0.912007  
 H -7.043698 -1.963936 0.821696  
 C -5.250072 1.517677 0.958818  
 C -6.641797 1.436738 0.959792  
 H -8.367455 0.140664 0.911256  
 H -4.734188 2.479846 0.989734  
 H -7.244268 2.346351 0.994216  
 C -4.118845 -2.025806 0.818721  
 H -4.305904 -2.717160 -0.017180  
 H -4.159497 -2.631107 1.739693

-----  
 SMDopt/16\_TS\_SRe

Frequencies, energies and thermodynamic properties:

Lowest Vibrational Mode (1/cm) = -251.2712  
 2nd Lowest Vibrational Mode (1/cm) = 19.9082  
 E(RM062X) (a.u.) = -2420.03559700  
 Thermal correction to Enthalpy (a.u.) = 0.632837  
 Thermal correction to Gibbs Free Energy (a.u.) = 0.524894  
 Total Entropy (cal/Kmol) = 227.186  
 Esp(RM062X+D3) (a.u.) = -2422.44678286  
 Esp(D3) (a.u.) = -0.0092413852  
 Esp(RM062X) (a.u.) = -2422.4375414748

Optimised cartesian coordinates (Angstrom):

C -7.239048 -0.791369 -0.459457  
 C -7.212257 -2.027521 0.201583  
 C -6.016191 -2.558433 0.675692  
 C -4.849801 -1.822279 0.472267  
 C -4.878578 -0.595990 -0.194656  
 H -8.140349 -2.580604 0.350914  
 H -5.990650 -3.518245 1.193473

|   |           |           |           |
|---|-----------|-----------|-----------|
| C | -2.635861 | -0.735280 | 0.295530  |
| C | -0.976247 | 0.989226  | -0.242533 |
| C | -1.904454 | 1.274613  | -1.435463 |
| C | -3.358285 | 1.232909  | -1.000689 |
| H | -4.024404 | 1.254481  | -1.872938 |
| S | -3.215061 | -2.248636 | 0.949662  |
| N | -3.605133 | -0.026907 | -0.293653 |
| N | -1.374623 | -0.295295 | 0.385839  |
| C | -1.542018 | 2.564773  | -2.206246 |
| C | -2.243644 | 3.826610  | -1.696970 |
| C | -1.829662 | 2.377032  | -3.696137 |
| H | -0.454547 | 2.704264  | -2.089831 |
| H | -3.320805 | 3.796988  | -1.926098 |
| H | -2.128980 | 3.976058  | -0.613880 |
| H | -1.827212 | 4.709704  | -2.203570 |
| H | -1.242564 | 1.547037  | -4.115739 |
| H | -2.896778 | 2.159511  | -3.864193 |
| H | -1.581879 | 3.289662  | -4.258012 |
| H | -1.751671 | 0.430777  | -2.127323 |
| H | 0.027901  | 0.809152  | -0.654819 |
| C | -0.900446 | 2.112873  | 0.769671  |
| C | 0.166500  | 3.015588  | 0.681047  |
| C | -1.879376 | 2.304045  | 1.750361  |
| C | 0.228518  | 4.118987  | 1.531142  |
| H | 0.955884  | 2.830596  | -0.053001 |
| C | -1.814826 | 3.407060  | 2.602985  |
| H | -2.701729 | 1.592367  | 1.863335  |
| C | -0.767779 | 4.322111  | 2.487858  |
| H | 1.062263  | 4.819009  | 1.451999  |
| H | -2.585763 | 3.549503  | 3.362313  |
| H | -0.720130 | 5.185230  | 3.154214  |
| C | 0.892679  | -0.496452 | 1.278898  |
| H | 0.990531  | 0.585241  | 1.279916  |
| C | 2.025146  | -1.275101 | 1.353430  |
| C | 3.191972  | -0.690170 | 2.096167  |
| F | 2.965504  | -0.753890 | 3.419873  |
| F | 4.347466  | -1.326078 | 1.892448  |

|   |           |           |           |
|---|-----------|-----------|-----------|
| F | 3.391197  | 0.600286  | 1.809651  |
| O | -0.652288 | -2.290464 | 1.229809  |
| C | -0.363075 | -1.127252 | 0.996606  |
| H | -3.625773 | 2.066964  | -0.335074 |
| C | -6.075711 | -0.056794 | -0.667993 |
| H | -6.102841 | 0.908167  | -1.173588 |
| H | -8.189303 | -0.392384 | -0.816531 |
| H | 1.942668  | -2.360808 | 1.452991  |
| C | -0.479545 | -2.376859 | -1.933450 |
| H | -0.836323 | -3.021482 | -1.116731 |
| H | -1.269007 | -1.678245 | -2.236096 |
| H | -0.200265 | -3.008227 | -2.787990 |
| C | 1.738867  | -2.283391 | -1.198965 |
| O | 0.621473  | -1.590616 | -1.503346 |
| O | 1.781293  | -3.493413 | -1.307253 |
| C | 2.985033  | -0.034189 | -0.975041 |
| O | 2.111693  | 0.822696  | -1.093168 |
| C | 2.853213  | -1.464348 | -0.737143 |
| C | 5.167966  | -0.949787 | -0.872905 |
| C | 6.561594  | -0.925930 | -0.841411 |
| C | 4.454301  | 0.246854  | -0.984728 |
| C | 7.214817  | 0.306076  | -0.934114 |
| H | 7.135800  | -1.850362 | -0.747006 |
| C | 5.097672  | 1.480305  | -1.075915 |
| C | 6.491729  | 1.501538  | -1.051210 |
| H | 8.306061  | 0.339559  | -0.913947 |
| H | 4.514750  | 2.400165  | -1.159780 |
| H | 7.026941  | 2.450517  | -1.119654 |
| C | 4.220513  | -2.120173 | -0.794665 |
| H | 4.442385  | -2.772028 | 0.063713  |
| H | 4.307890  | -2.753157 | -1.694310 |

-----

SMDopt/16\_TS\_SRF

Frequencies, energies and thermodynamic properties:

|                                      |                |
|--------------------------------------|----------------|
| Lowest Vibrational Mode (1/cm) =     | -212.9017      |
| 2nd Lowest Vibrational Mode (1/cm) = | 15.9627        |
| E(RM062X) (a.u.) =                   | -2420.02555196 |



Thermal correction to Enthalpy (a.u.) = 0.632525  
Thermal correction to Gibbs Free Energy (a.u.) = 0.522247  
Total Entropy (cal/Kmol) = 232.099  
Esp(RM062X+D3) (a.u.) = -2422.44006488  
Esp(D3) (a.u.) = -0.0091689228  
Esp(RM062X) (a.u.) = -2422.4308959572

Optimised cartesian coordinates (Angstrom):

C -6.803302 2.176006 0.077900  
C -6.484635 3.220132 -0.802413  
C -5.198594 3.354258 -1.316544  
C -4.241592 2.416892 -0.929362  
C -4.559042 1.384501 -0.044728  
H -7.254495 3.936356 -1.091878  
H -4.946064 4.163849 -2.002716  
C -2.349430 0.900507 -0.453513  
C -1.160780 -1.046564 0.447956  
C -2.103671 -0.855424 1.647722  
C -3.510575 -0.548486 1.168304  
H -4.143874 -0.229531 2.006422  
S -2.554826 2.348280 -1.407070  
N -3.456052 0.564665 0.215289  
N -1.227409 0.165167 -0.408247  
C -2.053430 -2.018120 2.664949  
C -3.045115 -3.150379 2.384932  
C -2.268183 -1.478910 4.079400  
H -1.032948 -2.432771 2.615330  
H -4.079870 -2.821831 2.571890  
H -2.988058 -3.528316 1.354149  
H -2.843475 -3.992621 3.062988  
H -1.493851 -0.746456 4.350589  
H -3.249771 -0.985634 4.165211  
H -2.239090 -2.296146 4.815024  
H -1.732505 0.046409 2.161900  
H -0.138062 -1.071952 0.850328  
C -1.389687 -2.317853 -0.341858  
C -0.576526 -3.423609 -0.063060  
C -2.405723 -2.436131 -1.295633

C -0.804014 -4.643038 -0.699509  
H 0.248053 -3.308806 0.646588  
C -2.630354 -3.656834 -1.933958  
H -3.030555 -1.577421 -1.554989  
C -1.837931 -4.764318 -1.629673  
H -0.166871 -5.500138 -0.473899  
H -3.427833 -3.740999 -2.674307  
H -2.016794 -5.718098 -2.129233  
C 1.020218 -0.348731 -1.217962  
H 0.816337 -1.409366 -1.088655  
C 2.313042 0.070363 -1.383843  
C 3.277670 -0.881433 -2.026713  
F 3.112950 -0.848634 -3.364223  
F 4.553211 -0.598930 -1.803551  
F 3.066293 -2.151832 -1.658956  
O -0.044022 1.748113 -1.553377  
C -0.045592 0.615654 -1.105523  
H -3.987846 -1.408073 0.674954  
C -5.848636 1.243470 0.471028  
H -6.103734 0.429512 1.149215  
H -7.820094 2.088315 0.462757  
H 2.536009 1.124427 -1.570641  
C 3.974024 -3.352930 1.004071  
H 3.237087 -3.731512 0.281233  
H 4.951921 -3.806420 0.805523  
H 3.642111 -3.619047 2.018030  
C 3.047501 -1.204542 1.051318  
O 4.146537 -1.955051 0.869991  
O 1.977946 -1.706706 1.378893  
C 4.472813 0.930493 0.621283  
O 5.612771 0.536433 0.440423  
C 3.210607 0.203386 0.779652  
C 2.768971 2.506001 1.139480  
C 2.205692 3.769026 1.310198  
C 4.103383 2.384449 0.744268  
C 3.004237 4.895174 1.084998  
H 1.161871 3.882305 1.612003

|   |          |          |          |
|---|----------|----------|----------|
| C | 4.909158 | 3.500051 | 0.530461 |
| C | 4.345546 | 4.765643 | 0.701908 |
| H | 2.576629 | 5.892005 | 1.210743 |
| H | 5.952492 | 3.374781 | 0.232072 |
| H | 4.947304 | 5.661014 | 0.534670 |
| C | 2.163201 | 1.137407 | 1.330580 |
| H | 1.974657 | 0.944518 | 2.402170 |
| H | 1.179325 | 1.035912 | 0.842785 |

-----

SMDopt/16\_TS\_SSa

Frequencies, energies and thermodynamic properties:

|                                                  |                  |
|--------------------------------------------------|------------------|
| Lowest Vibrational Mode (1/cm) =                 | -232.8245        |
| 2nd Lowest Vibrational Mode (1/cm) =             | 16.6609          |
| E(RM062X) (a.u.) =                               | -2420.03524788   |
| Thermal correction to Enthalpy (a.u.) =          | 0.632832         |
| Thermal correction to Gibbs Free Energy (a.u.) = | 0.523360         |
| Total Entropy (cal/Kmol) =                       | 230.403          |
| Esp(RM062X+D3) (a.u.) =                          | -2422.44809058   |
| Esp(D3) (a.u.) =                                 | -0.0093118736    |
| Esp(RM062X) (a.u.) =                             | -2422.4387787064 |
| Esp(RM062X+D3) PCM (a.u.) =                      | -2422.42682604   |
| Esp(RM062X) PCM (a.u.) =                         | -2422.4175141664 |
| Esp(RM062X+D3) GAS (a.u.) =                      | -2422.39413334   |
| Esp(RM062X) GAS (a.u.) =                         | -2422.3848214664 |

Optimised cartesian coordinates (Angstrom):

|   |           |           |           |
|---|-----------|-----------|-----------|
| C | -6.435189 | 2.392292  | 0.089850  |
| C | -6.028600 | 3.453654  | -0.730826 |
| C | -4.731689 | 3.510805  | -1.232954 |
| C | -3.854119 | 2.481724  | -0.894492 |
| C | -4.259139 | 1.430699  | -0.069650 |
| H | -6.736304 | 4.244363  | -0.982639 |
| H | -4.410073 | 4.333107  | -1.873749 |
| C | -2.087275 | 0.797658  | -0.494443 |
| C | -1.036601 | -1.249285 | 0.346670  |
| C | -1.991680 | -1.048149 | 1.534056  |
| C | -3.367877 | -0.639095 | 1.041843  |
| H | -4.001461 | -0.327572 | 1.882371  |

S -2.173182 2.307915 -1.371318  
N -3.226196 0.513907 0.149097  
N -1.027113 -0.016308 -0.475377  
C -2.032519 -2.247096 2.507466  
C -3.084701 -3.305745 2.166411  
C -2.242879 -1.747845 3.937198  
H -1.038548 -2.722473 2.461166  
H -4.101387 -2.920798 2.344638  
H -3.027740 -3.648611 1.123317  
H -2.950165 -4.182998 2.816214  
H -1.431767 -1.073793 4.249086  
H -3.194740 -1.199380 4.023543  
H -2.278028 -2.591227 4.642550  
H -1.570161 -0.189781 2.082149  
H -0.028103 -1.308817 0.777107  
C -1.311195 -2.477593 -0.494951  
C -0.584243 -3.645968 -0.239105  
C -2.299413 -2.495211 -1.485428  
C -0.864708 -4.822507 -0.932315  
H 0.210977 -3.628134 0.510614  
C -2.579750 -3.671985 -2.181193  
H -2.859491 -1.588843 -1.729200  
C -1.870149 -4.839952 -1.900130  
H -0.291798 -5.726871 -0.720005  
H -3.355460 -3.673805 -2.948992  
H -2.091450 -5.759453 -2.444866  
C 1.256302 -0.577236 -1.176184  
H 1.084795 -1.623463 -0.938296  
C 2.541953 -0.125630 -1.348050  
C 3.568763 -1.119112 -1.807618  
F 3.441769 -1.330963 -3.129545  
F 4.829806 -0.729065 -1.617847  
F 3.428744 -2.313439 -1.220209  
O 0.251438 1.524746 -1.575272  
C 0.201062 0.396132 -1.115052  
H -3.879793 -1.446254 0.496997  
C -5.559935 1.366148 0.432926

|   |           |           |           |
|---|-----------|-----------|-----------|
| H | -5.884531 | 0.539719  | 1.064788  |
| H | -7.458125 | 2.364682  | 0.467428  |
| H | 2.725787  | 0.890105  | -1.708793 |
| C | 2.893286  | -2.987411 | 1.877859  |
| H | 3.569446  | -2.999427 | 2.744054  |
| H | 1.930208  | -3.429567 | 2.157997  |
| H | 3.352432  | -3.572075 | 1.067359  |
| C | 3.706538  | -0.911622 | 1.169925  |
| O | 2.624311  | -1.662687 | 1.456406  |
| O | 4.834693  | -1.344318 | 1.299846  |
| C | 2.171602  | 1.135785  | 1.054434  |
| O | 1.067517  | 0.683729  | 1.354163  |
| C | 3.380708  | 0.425368  | 0.687296  |
| C | 3.820663  | 2.756448  | 0.560478  |
| C | 4.331971  | 4.038226  | 0.355185  |
| C | 2.475135  | 2.590613  | 0.898353  |
| C | 3.478492  | 5.133740  | 0.508256  |
| H | 5.379532  | 4.187190  | 0.083633  |
| C | 1.615499  | 3.677901  | 1.050534  |
| C | 2.130227  | 4.958234  | 0.853403  |
| H | 3.865643  | 6.143343  | 0.356245  |
| H | 0.566126  | 3.515496  | 1.306346  |
| H | 1.484509  | 5.831706  | 0.962752  |
| C | 4.505699  | 1.415494  | 0.469637  |
| H | 5.286359  | 1.311718  | 1.242061  |
| H | 5.013427  | 1.294647  | -0.499905 |

-----  
SMDopt/16\_TS\_SSb

Frequencies, energies and thermodynamic properties:

|                                                  |                |
|--------------------------------------------------|----------------|
| Lowest Vibrational Mode (1/cm) =                 | -157.8511      |
| 2nd Lowest Vibrational Mode (1/cm) =             | 15.7896        |
| E(RM062X) (a.u.) =                               | -2420.02782690 |
| Thermal correction to Enthalpy (a.u.) =          | 0.632508       |
| Thermal correction to Gibbs Free Energy (a.u.) = | 0.522079       |
| Total Entropy (cal/Kmol) =                       | 232.418        |
| Esp(RM062X+D3) (a.u.) =                          | -2422.44660505 |
| Esp(D3) (a.u.) =                                 | -0.0095437758  |

Esp(RM062X) (a.u.) = -2422.4370612742

Optimised cartesian coordinates (Angstrom):

|   |           |           |           |
|---|-----------|-----------|-----------|
| C | 6.759225  | -2.270148 | -0.047417 |
| C | 6.320010  | -3.549885 | -0.419051 |
| C | 4.970842  | -3.806841 | -0.636122 |
| C | 4.072717  | -2.752572 | -0.467074 |
| C | 4.510631  | -1.483113 | -0.087187 |
| H | 7.045649  | -4.354493 | -0.543709 |
| H | 4.624127  | -4.798406 | -0.930821 |
| C | 2.252410  | -1.094105 | -0.271296 |
| C | 1.162766  | 1.076016  | 0.138677  |
| C | 2.353085  | 1.303816  | 1.084986  |
| C | 3.636844  | 0.810319  | 0.447375  |
| H | 4.456873  | 0.828009  | 1.176154  |
| S | 2.334855  | -2.785577 | -0.687630 |
| N | 3.447452  | -0.581245 | 0.028283  |
| N | 1.122575  | -0.354841 | -0.264816 |
| C | 2.460046  | 2.756936  | 1.601636  |
| C | 3.300996  | 3.682970  | 0.717779  |
| C | 3.017346  | 2.763903  | 3.025262  |
| H | 1.431451  | 3.153029  | 1.641363  |
| H | 4.368689  | 3.419276  | 0.780913  |
| H | 3.006211  | 3.659201  | -0.340630 |
| H | 3.200595  | 4.719632  | 1.071278  |
| H | 2.370074  | 2.203662  | 3.715133  |
| H | 4.020699  | 2.309386  | 3.054226  |
| H | 3.106542  | 3.794072  | 3.400206  |
| H | 2.158576  | 0.657226  | 1.955233  |
| H | 0.259477  | 1.241793  | 0.742213  |
| C | 1.134778  | 1.993972  | -1.066465 |
| C | 0.375266  | 3.168225  | -1.004605 |
| C | 1.883803  | 1.723173  | -2.215673 |
| C | 0.391964  | 4.075997  | -2.061721 |
| H | -0.235431 | 3.366878  | -0.119254 |
| C | 1.899333  | 2.631828  | -3.274917 |
| H | 2.459552  | 0.797807  | -2.300063 |
| C | 1.161042  | 3.812670  | -3.196764 |

H -0.202912 4.988955 -2.002176  
H 2.489126 2.411897 -4.166376  
H 1.173646 4.521522 -4.026493  
C -1.245834 -0.065096 -0.863207  
H -1.128092 1.010107 -0.765665  
C -2.467087 -0.559685 -1.186372  
C -3.467496 0.387785 -1.782300  
F -3.222113 0.520602 -3.101187  
F -4.726887 -0.023137 -1.682501  
F -3.387789 1.612242 -1.260312  
O -0.115772 -2.147106 -0.927206  
C -0.107934 -0.954478 -0.690379  
H 3.931859 1.401372 -0.432439  
C 5.866052 -1.218423 0.123107  
H 6.216812 -0.225352 0.402419  
H 7.823703 -2.091459 0.109524  
H -2.639408 -1.620141 -1.386901  
C -6.932416 -2.055970 -0.511610  
H -7.134618 -3.063165 -0.118440  
H -7.848770 -1.455222 -0.471194  
H -6.601162 -2.153783 -1.556484  
C -4.740415 -1.928660 0.289391  
O -5.970048 -1.377181 0.267102  
O -4.533910 -3.027746 -0.205716  
C -3.837315 0.227758 1.419325  
O -4.722073 1.072302 1.301733  
C -3.726962 -1.125677 0.929096  
C -1.763231 -0.683311 2.162439  
C -0.524970 -0.684628 2.806984  
C -2.537503 0.480984 2.133937  
C -0.086237 0.492108 3.420080  
H 0.085920 -1.590626 2.845236  
C -2.090483 1.666536 2.717810  
C -0.854332 1.665067 3.366896  
H 0.868049 0.498020 3.950835  
H -2.712483 2.563750 2.674886  
H -0.484200 2.573814 3.847011

C -2.493244 -1.805322 1.472789  
H -1.871660 -2.290171 0.705278  
H -2.743405 -2.597168 2.202795

-----

SMDopt/16\_TS\_SSc

Frequencies, energies and thermodynamic properties:

Lowest Vibrational Mode (1/cm) = -161.0352  
2nd Lowest Vibrational Mode (1/cm) = 13.6185  
E(RM062X) (a.u.) = -2420.02650616  
Thermal correction to Enthalpy (a.u.) = 0.632419  
Thermal correction to Gibbs Free Energy (a.u.) = 0.521353  
Total Entropy (cal/Kmol) = 233.757  
Esp(RM062X+D3) (a.u.) = -2422.44530805  
Esp(D3) (a.u.) = -0.0095634773  
Esp(RM062X) (a.u.) = -2422.4357445727

Optimised cartesian coordinates (Angstrom):

C 6.629704 -2.457135 0.055391  
C 6.147204 -3.724297 -0.305474  
C 4.791802 -3.933829 -0.534412  
C 3.931588 -2.845010 -0.388985  
C 4.412648 -1.587784 -0.021298  
H 6.843782 -4.556698 -0.412061  
H 4.411699 -4.915571 -0.820313  
C 2.172812 -1.117009 -0.234962  
C 1.164844 1.101082 0.123449  
C 2.354431 1.305043 1.076120  
C 3.623738 0.745614 0.464471  
H 4.435099 0.744432 1.202963  
S 2.196175 -2.816053 -0.628726  
N 3.383290 -0.644995 0.069387  
N 1.071423 -0.335954 -0.247979  
C 2.515106 2.765667 1.557233  
C 3.391973 3.638820 0.654305  
C 3.069330 2.787878 2.982025  
H 1.501809 3.200620 1.583656  
H 4.449338 3.338583 0.727867  
H 3.099903 3.600890 -0.404354



|   |           |           |           |
|---|-----------|-----------|-----------|
| H | 3.328061  | 4.686477  | 0.982968  |
| H | 2.398963  | 2.272048  | 3.684235  |
| H | 4.054113  | 2.295620  | 3.026530  |
| H | 3.197711  | 3.823248  | 3.330244  |
| H | 2.125011  | 0.688779  | 1.960166  |
| H | 0.264774  | 1.316410  | 0.715211  |
| C | 1.179793  | 1.989619  | -1.103329 |
| C | 0.458954  | 3.188973  | -1.076815 |
| C | 1.931993  | 1.668234  | -2.237388 |
| C | 0.517032  | 4.071756  | -2.153437 |
| H | -0.153933 | 3.428301  | -0.203082 |
| C | 1.989174  | 2.551905  | -3.316245 |
| H | 2.478914  | 0.723381  | -2.294316 |
| C | 1.289470  | 3.757850  | -3.273124 |
| H | -0.048055 | 5.004776  | -2.120841 |
| H | 2.581397  | 2.293081  | -4.195560 |
| H | 1.334814  | 4.447179  | -4.118002 |
| C | -1.285324 | 0.028637  | -0.853206 |
| H | -1.140063 | 1.098908  | -0.741639 |
| C | -2.515862 | -0.428452 | -1.195795 |
| C | -3.484446 | 0.549923  | -1.794012 |
| F | -3.236351 | 0.665921  | -3.115062 |
| F | -4.754537 | 0.186915  | -1.686852 |
| F | -3.355469 | 1.774759  | -1.280510 |
| O | -0.224053 | -2.088745 | -0.906355 |
| C | -0.176888 | -0.895700 | -0.675280 |
| H | 3.953411  | 1.306075  | -0.423063 |
| C | 5.774351  | -1.371015 | 0.202100  |
| H | 6.157865  | -0.387901 | 0.473365  |
| H | 7.698239  | -2.316156 | 0.222842  |
| H | -2.707618 | -1.481934 | -1.411341 |
| C | -5.466175 | -3.814368 | -0.544214 |
| H | -5.900829 | -3.392242 | -1.462220 |
| H | -4.969655 | -4.764327 | -0.774954 |
| H | -6.281113 | -3.988374 | 0.173763  |
| C | -4.906257 | -1.712664 | 0.360967  |
| O | -4.478184 | -2.960426 | -0.004367 |

|   |           |           |          |
|---|-----------|-----------|----------|
| O | -6.064180 | -1.390403 | 0.197310 |
| C | -3.918229 | 0.428447  | 1.360195 |
| O | -4.800707 | 1.270547  | 1.210387 |
| C | -3.818074 | -0.942062 | 0.918942 |
| C | -1.862084 | -0.472551 | 2.157736 |
| C | -0.630637 | -0.462916 | 2.815358 |
| C | -2.622710 | 0.697900  | 2.075875 |
| C | -0.183656 | 0.732066  | 3.385583 |
| H | -0.031459 | -1.373941 | 2.896461 |
| C | -2.166998 | 1.900546  | 2.616496 |
| C | -0.936868 | 1.910920  | 3.276930 |
| H | 0.765177  | 0.747999  | 3.925755 |
| H | -2.777504 | 2.802684  | 2.532006 |
| H | -0.560381 | 2.833876  | 3.723718 |
| C | -2.596192 | -1.613265 | 1.503628 |
| H | -1.969849 | -2.131711 | 0.762348 |
| H | -2.860496 | -2.374083 | 2.260454 |

-----  
SMDopt/16\_TS\_SSd

Frequencies, energies and thermodynamic properties:

|                                                  |                  |
|--------------------------------------------------|------------------|
| Lowest Vibrational Mode (1/cm) =                 | -273.1742        |
| 2nd Lowest Vibrational Mode (1/cm) =             | 17.8895          |
| E(RM062X) (a.u.) =                               | -2420.03763112   |
| Thermal correction to Enthalpy (a.u.) =          | 0.632855         |
| Thermal correction to Gibbs Free Energy (a.u.) = | 0.524141         |
| Total Entropy (cal/Kmol) =                       | 228.807          |
| Esp(RM062X+D3) (a.u.) =                          | -2422.44758426   |
| Esp(D3) (a.u.) =                                 | -0.0091158763    |
| Esp(RM062X) (a.u.) =                             | -2422.4384683837 |

Optimised cartesian coordinates (Angstrom):

|   |           |          |           |
|---|-----------|----------|-----------|
| C | -6.697956 | 2.104994 | 0.064016  |
| C | -6.400595 | 3.116157 | -0.859956 |
| C | -5.125746 | 3.230366 | -1.407876 |
| C | -4.159193 | 2.307504 | -1.011462 |
| C | -4.456116 | 1.306744 | -0.083803 |
| H | -7.176905 | 3.822156 | -1.157325 |
| H | -4.889849 | 4.015438 | -2.127765 |

C -2.255026 0.802569 -0.529221  
C -1.040640 -1.098057 0.420376  
C -1.951085 -0.853983 1.634281  
C -3.373084 -0.572884 1.182868  
H -3.984322 -0.217615 2.023021  
S -2.480368 2.225083 -1.522023  
N -3.348754 0.495046 0.179619  
N -1.142286 0.067863 -0.491197  
C -1.866657 -1.964326 2.705256  
C -2.859391 -3.113328 2.510108  
C -2.042083 -1.357726 4.097707  
H -0.846162 -2.377805 2.645942  
H -3.890577 -2.780781 2.709612  
H -2.828757 -3.540474 1.497522  
H -2.634669 -3.920997 3.222290  
H -1.986430 -2.137135 4.872052  
H -1.264132 -0.609396 4.308559  
H -3.023463 -0.864769 4.188740  
H -1.559951 0.071588 2.087177  
H -0.009768 -1.074477 0.799054  
C -1.280190 -2.406840 -0.300327  
C -0.444398 -3.489768 0.000233  
C -2.326660 -2.583090 -1.211866  
C -0.679225 -4.741315 -0.568007  
H 0.403068 -3.332227 0.673455  
C -2.558328 -3.834955 -1.783853  
H -2.970014 -1.743485 -1.488214  
C -1.742858 -4.918501 -1.454676  
H -0.024307 -5.579957 -0.324445  
H -3.379287 -3.962874 -2.491640  
H -1.927117 -5.897198 -1.901402  
C 1.105752 -0.436831 -1.292593  
H 0.932350 -1.487031 -1.073447  
C 2.403113 0.003773 -1.448929  
C 3.379186 -0.984366 -2.026230  
F 3.194692 -1.079634 -3.354339  
F 4.662539 -0.663092 -1.857220

|   |           |           |           |
|---|-----------|-----------|-----------|
| F | 3.215365  | -2.218429 | -1.534185 |
| O | 0.030950  | 1.643054  | -1.668542 |
| C | 0.044102  | 0.519452  | -1.193604 |
| H | -3.860206 | -1.456717 | 0.744815  |
| C | -5.732840 | 1.186422  | 0.467046  |
| H | -5.970788 | 0.397273  | 1.180045  |
| H | -7.705225 | 2.031273  | 0.476034  |
| H | 2.599041  | 1.032111  | -1.766396 |
| C | 4.475004  | -3.016749 | 1.271601  |
| H | 3.891573  | -3.589214 | 0.536744  |
| H | 5.529519  | -3.309459 | 1.218325  |
| H | 4.081535  | -3.226327 | 2.276409  |
| C | 3.200491  | -1.067992 | 0.979139  |
| O | 4.427534  | -1.630631 | 0.982671  |
| O | 2.204110  | -1.709991 | 1.253349  |
| C | 2.155496  | 1.218084  | 0.983448  |
| O | 0.992482  | 0.931629  | 1.248437  |
| C | 3.235750  | 0.330194  | 0.572662  |
| C | 4.074610  | 2.554556  | 0.670826  |
| C | 4.808003  | 3.738322  | 0.587918  |
| C | 2.707960  | 2.603626  | 0.955147  |
| C | 4.150217  | 4.951538  | 0.805565  |
| H | 5.876332  | 3.721407  | 0.360974  |
| C | 2.042561  | 3.809816  | 1.173241  |
| C | 2.778618  | 4.990857  | 1.096517  |
| H | 4.712226  | 5.885896  | 0.747607  |
| H | 0.972048  | 3.815152  | 1.389765  |
| H | 2.289744  | 5.953247  | 1.259116  |
| C | 4.527113  | 1.126075  | 0.492736  |
| H | 5.226456  | 0.835799  | 1.294487  |
| H | 5.071789  | 1.000785  | -0.453053 |

-----

SMDopt/16\_TS\_SSe

Frequencies, energies and thermodynamic properties:

|                                      |                |
|--------------------------------------|----------------|
| Lowest Vibrational Mode (1/cm) =     | -213.0285      |
| 2nd Lowest Vibrational Mode (1/cm) = | 14.3624        |
| E(RM062X) (a.u.) =                   | -2420.03012170 |

Thermal correction to Enthalpy (a.u.) = 0.632555  
Thermal correction to Gibbs Free Energy (a.u.) = 0.522380  
Total Entropy (cal/Kmol) = 231.881  
Esp(RM062X+D3) (a.u.) = -2422.44449629  
Esp(D3) (a.u.) = -0.0089726091  
Esp(RM062X) (a.u.) = -2422.4355236809

Optimised cartesian coordinates (Angstrom):

C 7.232994 -1.203465 0.502974  
C 7.108035 -2.413344 -0.195099  
C 5.876831 -2.825202 -0.696189  
C 4.776127 -1.996284 -0.482731  
C 4.901804 -0.797302 0.221079  
H 7.986808 -3.040170 -0.351226  
H 5.773874 -3.764541 -1.241281  
C 2.659454 -0.733328 -0.285900  
C 1.151130 1.112272 0.287463  
C 2.077679 1.261707 1.505570  
C 3.527572 1.121805 1.080243  
H 4.185050 1.058153 1.957114  
S 3.117108 -2.267833 -0.984968  
N 3.679437 -0.126362 0.327964  
N 1.439810 -0.182627 -0.374317  
C 1.815463 2.539238 2.334430  
C 2.632819 3.757107 1.895413  
C 2.061995 2.254416 3.816160  
H 0.746387 2.779655 2.213570  
H 3.698531 3.623437 2.140167  
H 2.553543 3.963279 0.818404  
H 2.284180 4.649934 2.434927  
H 1.399494 1.458264 4.186033  
H 3.103676 1.937798 3.985693  
H 1.884076 3.156438 4.420011  
H 1.838423 0.396159 2.144526  
H 0.135043 1.005204 0.687413  
C 1.193101 2.268091 -0.689399  
C 0.238275 3.284849 -0.570340  
C 2.182762 2.374164 -1.672365

C 0.290635 4.405763 -1.397231  
H -0.552215 3.193878 0.179281  
C 2.234751 3.495739 -2.501345  
H 2.921560 1.579671 -1.805752  
C 1.294611 4.516866 -2.360567  
H -0.458512 5.192532 -1.292685  
H 3.013085 3.568951 -3.262887  
H 1.336513 5.392940 -3.010067  
C -0.855418 -0.206828 -1.254377  
H -0.883441 0.881576 -1.267151  
C -2.008428 -0.933883 -1.388661  
C -3.174449 -0.298581 -2.086092  
F -2.912819 -0.179058 -3.399962  
F -4.299976 -1.007782 -2.000835  
F -3.439958 0.935839 -1.645113  
O 0.572260 -2.090391 -1.272120  
C 0.368895 -0.921790 -0.989166  
H 3.865956 1.955575 0.447293  
C 6.134990 -0.377731 0.722597  
H 6.237937 0.565013 1.259291  
H 8.209567 -0.898728 0.881308  
H -1.970826 -2.021928 -1.482684  
C -0.401003 -3.743947 1.347338  
H 0.422862 -3.398704 0.706912  
H -0.140880 -3.555745 2.399046  
H -0.565273 -4.817065 1.195145  
C -1.645338 -1.768548 1.160183  
O -1.615085 -3.102358 0.998870  
O -0.657236 -1.150621 1.540782  
C -4.170186 -1.785692 0.616704  
O -4.442638 -2.950697 0.372458  
C -2.875195 -1.126173 0.776967  
C -4.562393 0.503613 1.128913  
C -5.324343 1.655250 1.320846  
C -5.192114 -0.698804 0.797703  
C -6.713200 1.573751 1.182325  
H -4.849677 2.605803 1.575048

C -6.575005 -0.789170 0.656891  
C -7.337401 0.362509 0.854473  
H -7.322283 2.467808 1.330893  
H -7.037686 -1.743475 0.394993  
H -8.423565 0.326525 0.750538  
C -3.067994 0.306932 1.217749  
H -2.712315 0.464359 2.250754  
H -2.516711 1.033194 0.593228

-----

SMDopt/16\_TS\_SSf

Frequencies, energies and thermodynamic properties:

Lowest Vibrational Mode (1/cm) = -198.0259  
2nd Lowest Vibrational Mode (1/cm) = 15.8719  
E(RM062X) (a.u.) = -2420.02670263  
Thermal correction to Enthalpy (a.u.) = 0.632408  
Thermal correction to Gibbs Free Energy (a.u.) = 0.522634  
Total Entropy (cal/Kmol) = 231.039  
Esp(RM062X+D3) (a.u.) = -2422.44317140  
Esp(D3) (a.u.) = -0.0092202221  
Esp(RM062X) (a.u.) = -2422.4339511779

Optimised cartesian coordinates (Angstrom):

C -7.219906 -1.031502 -0.562063  
C -7.141359 -2.262879 0.105041  
C -5.929677 -2.728770 0.605252  
C -4.800001 -1.932013 0.421270  
C -4.879570 -0.711580 -0.251236  
H -8.041930 -2.863697 0.237305  
H -5.863261 -3.684368 1.126950  
C -2.641612 -0.738283 0.273180  
C -1.064294 1.072029 -0.241410  
C -1.990664 1.312907 -1.445978  
C -3.443026 1.196989 -1.023143  
H -4.101809 1.195076 -1.901059  
S -3.157582 -2.268839 0.935299  
N -3.634248 -0.079544 -0.329460  
N -1.396959 -0.237612 0.371422  
C -1.691186 2.623163 -2.209846

C -2.464284 3.843232 -1.701700  
C -1.959240 2.424093 -3.701881  
H -0.613632 2.821177 -2.087275  
H -3.535089 3.758705 -1.945975  
H -2.372402 3.991183 -0.616257  
H -2.087929 4.750148 -2.197237  
H -1.326784 1.627367 -4.119951  
H -3.012380 2.151708 -3.877031  
H -1.756326 3.350414 -4.259141  
H -1.787670 0.477912 -2.135642  
H -0.051415 0.952874 -0.647951  
C -1.057957 2.188936 0.782049  
C -0.068842 3.175485 0.693867  
C -2.036798 2.290432 1.775897  
C -0.077837 4.265738 1.562066  
H 0.714620 3.085170 -0.063247  
C -2.045218 3.381679 2.646028  
H -2.801773 1.517377 1.886444  
C -1.072108 4.375132 2.535652  
H 0.697438 5.029622 1.481437  
H -2.815684 3.452514 3.415689  
H -1.080593 5.227609 3.217044  
C 0.882760 -0.338667 1.285706  
H 0.946290 0.747623 1.299916  
C 2.010023 -1.093831 1.438759  
C 3.194301 -0.445541 2.093917  
F 2.948862 -0.260017 3.403466  
F 4.310437 -1.168087 2.028378  
F 3.462288 0.764050 1.589276  
O -0.623097 -2.162450 1.312245  
C -0.370018 -1.008520 1.019051  
H -3.756005 2.009317 -0.350567  
C -6.093716 -0.237318 -0.750921  
H -6.161003 0.721713 -1.263755  
H -8.182446 -0.684789 -0.940106  
H 1.960623 -2.180408 1.539377  
C -0.406975 -2.410450 -1.863784



|   |           |           |           |
|---|-----------|-----------|-----------|
| H | -0.788473 | -2.949257 | -0.984123 |
| H | -1.178933 | -1.741672 | -2.265122 |
| H | -0.130501 | -3.149385 | -2.629681 |
| C | 1.799359  | -2.274684 | -1.053835 |
| O | 0.702816  | -1.600004 | -1.519512 |
| O | 1.764597  | -3.478398 | -0.903734 |
| C | 4.252484  | -1.844462 | -0.597918 |
| O | 4.676724  | -2.956832 | -0.320193 |
| C | 2.886838  | -1.368058 | -0.767803 |
| C | 4.343145  | 0.444557  | -1.232776 |
| C | 4.946836  | 1.671906  | -1.500377 |
| C | 5.125668  | -0.645119 | -0.843143 |
| C | 6.335903  | 1.779663  | -1.376366 |
| H | 4.351232  | 2.536944  | -1.801646 |
| C | 6.509078  | -0.547354 | -0.717646 |
| C | 7.114164  | 0.680912  | -0.988975 |
| H | 6.822487  | 2.735058  | -1.583657 |
| H | 7.093687  | -1.417869 | -0.411217 |
| H | 8.196486  | 0.791977  | -0.898204 |
| C | 2.884725  | 0.052316  | -1.281017 |
| H | 2.261446  | 0.733093  | -0.669915 |
| H | 2.492902  | 0.125503  | -2.309947 |

-----

SMDopt/9\_TS\_SRa

Frequencies, energies and thermodynamic properties:

|                                                  |                  |
|--------------------------------------------------|------------------|
| Lowest Vibrational Mode (1/cm) =                 | -216.4889        |
| 2nd Lowest Vibrational Mode (1/cm) =             | 20.2966          |
| E(RM062X) (a.u.) =                               | -2267.75772887   |
| Thermal correction to Enthalpy (a.u.) =          | 0.606148         |
| Thermal correction to Gibbs Free Energy (a.u.) = | 0.503266         |
| Total Entropy (cal/Kmol) =                       | 216.534          |
| Esp(RM062X+D3) (a.u.) =                          | -2270.00820932   |
| Esp(D3) (a.u.) =                                 | -0.0085846993    |
| Esp(RM062X) (a.u.) =                             | -2269.9996246207 |

Optimised cartesian coordinates (Angstrom):

|   |          |           |           |
|---|----------|-----------|-----------|
| C | 6.685079 | -1.118298 | 0.121916  |
| C | 6.554169 | -2.326522 | -0.577437 |

C 5.307281 -2.772377 -1.005703  
C 4.197028 -1.979467 -0.718497  
C 4.329381 -0.781016 -0.014367  
H 7.440102 -2.925119 -0.792740  
H 5.200118 -3.710677 -1.551761  
C 2.060575 -0.780082 -0.389421  
C 0.531549 1.011299 0.294607  
C 1.530267 1.193508 1.448890  
C 2.955657 1.095482 0.936445  
H 3.666889 1.047341 1.771178  
S 2.518771 -2.298426 -1.121548  
N 3.096886 -0.146321 0.169961  
N 0.822180 -0.269388 -0.395603  
C 1.275732 2.464174 2.291023  
C 2.016995 3.710417 1.799838  
C 1.626711 2.195302 3.754682  
H 0.192480 2.662451 2.236998  
H 3.101127 3.615819 1.971316  
H 1.856710 3.913479 0.731345  
H 1.673822 4.590094 2.364003  
H 1.019302 1.376825 4.167996  
H 2.688305 1.918477 3.858365  
H 1.453968 3.092504 4.367227  
H 1.365241 0.327231 2.109969  
H -0.460384 0.873687 0.749754  
C 0.476060 2.174037 -0.672884  
C -0.534478 3.129096 -0.505163  
C 1.423652 2.349759 -1.686931  
C -0.570233 4.265555 -1.312390  
H -1.299841 2.958273 0.257235  
C 1.385024 3.486019 -2.496348  
H 2.201169 1.600267 -1.858079  
C 0.395433 4.450812 -2.303591  
H -1.359608 5.006347 -1.172327  
H 2.131076 3.616209 -3.282292  
H 0.368185 5.339930 -2.936082  
C -1.510339 -0.328053 -1.151337

H -1.557873 0.758337 -1.150053  
C -2.663078 -1.069688 -1.158916  
C -3.885904 -0.497642 -1.806689  
F -3.696290 -0.364524 -3.131146  
F -4.961370 -1.278058 -1.668622  
F -4.206087 0.719626 -1.354048  
O -0.054623 -2.192607 -1.250576  
C -0.266071 -1.025803 -0.962657  
H 3.231633 1.940613 0.288519  
C 5.577992 -0.327890 0.414548  
H 5.685623 0.613873 0.952136  
H 7.673281 -0.786353 0.442878  
H -2.607204 -2.159367 -1.223440  
C -0.097442 -2.400768 1.903794  
H 0.133921 -3.060346 1.054274  
H 0.776643 -1.784534 2.149285  
H -0.363512 -3.020447 2.771152  
C -2.357974 -2.085265 1.377199  
O -1.149065 -1.508101 1.574883  
O -2.501426 -3.288965 1.489386  
C -4.840730 -1.674007 1.207740  
C -3.389357 0.261517 1.306841  
C -5.726603 -0.412254 1.151033  
H -5.131179 -2.419991 0.453061  
C -4.814715 0.737635 1.583915  
H -6.620113 -0.508225 1.782996  
H -4.875431 0.920175 2.670914  
C -3.425350 -1.161220 1.032152  
O -2.420254 1.016378 1.331073  
H -4.935317 -2.175940 2.188050  
H -6.072519 -0.244703 0.122669  
H -5.011637 1.695937 1.082192

-----  
SMDopt/9\_TS\_SRB

Frequencies, energies and thermodynamic properties:

Lowest Vibrational Mode (1/cm) = -216.5058  
2nd Lowest Vibrational Mode (1/cm) = 20.3415

E(RM062X) (a.u.) = -2267.75772887  
Thermal correction to Enthalpy (a.u.) = 0.606148  
Thermal correction to Gibbs Free Energy (a.u.) = 0.503271  
Total Entropy (cal/Kmol) = 216.524  
Esp(RM062X+D3) (a.u.) = -2270.00820888  
Esp(D3) (a.u.) = -0.0085847589  
Esp(RM062X) (a.u.) = -2269.9996241211

Optimised cartesian coordinates (Angstrom):

C 6.685071 -1.118275 0.122007  
C 6.554188 -2.326479 -0.577386  
C 5.307314 -2.772329 -1.005699  
C 4.197049 -1.979434 -0.718500  
C 4.329375 -0.781004 -0.014330  
H 7.440131 -2.925064 -0.792684  
H 5.200172 -3.710614 -1.551787  
C 2.060580 -0.780071 -0.389450  
C 0.531521 1.011282 0.294579  
C 1.530215 1.193497 1.448881  
C 2.955614 1.095482 0.936459  
H 3.666839 1.047359 1.771200  
S 2.518806 -2.298394 -1.121606  
N 3.096870 -0.146322 0.169981  
N 0.822182 -0.269386 -0.395654  
C 1.275648 2.464171 2.290997  
C 2.016992 3.710389 1.799873  
C 1.626484 2.195282 3.754686  
H 0.192409 2.662488 2.236872  
H 3.101119 3.615714 1.971339  
H 1.856712 3.913510 0.731389  
H 1.673879 4.590060 2.364083  
H 1.018964 1.376867 4.167957  
H 2.688043 1.918352 3.858457  
H 1.453779 3.092505 4.367211  
H 1.365176 0.327225 2.109966  
H -0.460414 0.873647 0.749713  
C 0.476037 2.174034 -0.672897  
C -0.534505 3.129090 -0.505184

C 1.423644 2.349765 -1.686928  
C -0.570249 4.265555 -1.312403  
H -1.299881 2.958260 0.257199  
C 1.385026 3.486030 -2.496340  
H 2.201164 1.600275 -1.858069  
C 0.395430 4.450820 -2.303590  
H -1.359627 5.006345 -1.172347  
H 2.131088 3.616225 -3.282274  
H 0.368188 5.339940 -2.936077  
C -1.510337 -0.328085 -1.151373  
H -1.557878 0.758306 -1.150117  
C -2.663075 -1.069726 -1.158919  
C -3.885907 -0.497682 -1.806684  
F -3.696318 -0.364612 -3.131151  
F -4.961386 -1.278071 -1.668572  
F -4.206058 0.719608 -1.354078  
O -0.054594 -2.192618 -1.250626  
C -0.266060 -1.025818 -0.962706  
H 3.231585 1.940611 0.288529  
C 5.577971 -0.327884 0.414633  
H 5.685581 0.613862 0.952255  
H 7.673263 -0.786334 0.443005  
H -2.607204 -2.159405 -1.223433  
C -0.097340 -2.400645 1.903782  
H 0.134042 -3.060246 1.054284  
H 0.776730 -1.784382 2.149255  
H -0.363391 -3.020306 2.771158  
C -2.357895 -2.085224 1.377232  
O -1.148991 -1.508022 1.574841  
O -2.501324 -3.288917 1.489518  
C -4.840657 -1.674070 1.207746  
C -3.389365 0.261516 1.306818  
C -5.726590 -0.412356 1.151079  
H -5.131087 -2.420061 0.453066  
C -4.814735 0.737573 1.583927  
H -6.620062 -0.508371 1.783090  
H -4.875432 0.920104 2.670929

|   |           |           |          |
|---|-----------|-----------|----------|
| C | -3.425299 | -1.161226 | 1.032136 |
| O | -2.420300 | 1.016427  | 1.330989 |
| H | -4.935199 | -2.176018 | 2.188051 |
| H | -6.072572 | -0.244819 | 0.122735 |
| H | -5.011704 | 1.695870  | 1.082212 |

-----  
SMDopt/9\_TS\_SRc

Frequencies, energies and thermodynamic properties:

|                                                  |                  |
|--------------------------------------------------|------------------|
| Lowest Vibrational Mode (1/cm) =                 | -159.4732        |
| 2nd Lowest Vibrational Mode (1/cm) =             | 18.7210          |
| E(RM062X) (a.u.) =                               | -2267.74953607   |
| Thermal correction to Enthalpy (a.u.) =          | 0.605839         |
| Thermal correction to Gibbs Free Energy (a.u.) = | 0.500881         |
| Total Entropy (cal/Kmol) =                       | 220.902          |
| Esp(RM062X+D3) (a.u.) =                          | -2270.00435534   |
| Esp(D3) (a.u.) =                                 | -0.0085046751    |
| Esp(RM062X) (a.u.) =                             | -2269.9958506649 |

Optimised cartesian coordinates (Angstrom):

|   |          |           |           |
|---|----------|-----------|-----------|
| C | 6.847289 | -1.216297 | 0.296739  |
| C | 6.725239 | -2.432400 | -0.391414 |
| C | 5.485327 | -2.881568 | -0.834720 |
| C | 4.372313 | -2.082971 | -0.573790 |
| C | 4.495473 | -0.877227 | 0.118904  |
| H | 7.613619 | -3.034537 | -0.585642 |
| H | 5.384973 | -3.825448 | -1.372238 |
| C | 2.233750 | -0.879575 | -0.287221 |
| C | 0.705651 | 0.942304  | 0.326210  |
| C | 1.678424 | 1.135267  | 1.500853  |
| C | 3.113315 | 1.015016  | 1.022172  |
| H | 3.804416 | 0.973055  | 1.873950  |
| S | 2.701512 | -2.401973 | -1.000995 |
| N | 3.260786 | -0.239513 | 0.277156  |
| N | 0.992138 | -0.365449 | -0.320251 |
| C | 1.417661 | 2.425931  | 2.310470  |
| C | 2.178137 | 3.655531  | 1.806849  |
| C | 1.737224 | 2.186007  | 3.786146  |
| H | 0.337438 | 2.631931  | 2.231129  |

|   |           |           |           |
|---|-----------|-----------|-----------|
| H | 3.257825  | 3.557522  | 2.002434  |
| H | 2.040741  | 3.836310  | 0.731159  |
| H | 1.829784  | 4.549572  | 2.344512  |
| H | 1.116612  | 1.379955  | 4.204132  |
| H | 2.794811  | 1.906079  | 3.917503  |
| H | 1.557041  | 3.097296  | 4.375169  |
| H | 1.488743  | 0.281729  | 2.172427  |
| H | -0.299008 | 0.848793  | 0.763709  |
| C | 0.681929  | 2.078596  | -0.673440 |
| C | -0.325885 | 3.043324  | -0.550590 |
| C | 1.649647  | 2.219167  | -1.673382 |
| C | -0.340576 | 4.156214  | -1.390380 |
| H | -1.107260 | 2.899290  | 0.201714  |
| C | 1.631962  | 3.332428  | -2.514853 |
| H | 2.424997  | 1.460601  | -1.810553 |
| C | 0.644461  | 4.307391  | -2.368095 |
| H | -1.128340 | 4.904506  | -1.286024 |
| H | 2.392931  | 3.436276  | -3.290268 |
| H | 0.633867  | 5.177812  | -3.026491 |
| C | -1.324719 | -0.414930 | -1.110347 |
| H | -1.342134 | 0.672415  | -1.130069 |
| C | -2.493066 | -1.104958 | -1.185626 |
| C | -3.684696 | -0.447129 | -1.811231 |
| F | -3.637827 | -0.619416 | -3.148447 |
| F | -4.847290 | -0.942319 | -1.413847 |
| F | -3.706670 | 0.875976  | -1.609899 |
| O | 0.123741  | -2.292710 | -1.185711 |
| C | -0.081811 | -1.128441 | -0.899064 |
| H | 3.413597  | 1.845999  | 0.366915  |
| C | 5.737809  | -0.420839 | 0.563122  |
| H | 5.838414  | 0.526580  | 1.091910  |
| H | 7.830963  | -0.882797 | 0.629662  |
| H | -2.513091 | -2.196272 | -1.217340 |
| C | -4.780661 | 2.175528  | 0.915162  |
| H | -4.183895 | 2.589944  | 0.089965  |
| H | -5.843942 | 2.373135  | 0.734319  |
| H | -4.469900 | 2.663748  | 1.850708  |

C -3.392151 0.310051 1.194738  
 O -4.642462 0.772020 0.995111  
 O -2.449603 1.087146 1.338600  
 C -1.975595 -1.707933 1.716555  
 C -4.299508 -2.121013 1.214821  
 C -2.121031 -3.217215 1.465140  
 H -1.077423 -1.278922 1.239605  
 C -3.628814 -3.467743 1.540198  
 H -1.545358 -3.824094 2.177946  
 H -3.942137 -3.741267 2.562546  
 C -3.249498 -1.118951 1.182885  
 O -5.506867 -2.012873 1.067114  
 H -1.857282 -1.493311 2.795991  
 H -1.741793 -3.452644 0.458220  
 H -4.001845 -4.255174 0.868523

-----

SMDopt/9\_TS\_SRd

Frequencies, energies and thermodynamic properties:

Lowest Vibrational Mode (1/cm) = -261.1391  
 2nd Lowest Vibrational Mode (1/cm) = 25.2741  
 E(RM062X) (a.u.) = -2267.75871662  
 Thermal correction to Enthalpy (a.u.) = 0.606660  
 Thermal correction to Gibbs Free Energy (a.u.) = 0.504039  
 Total Entropy (cal/Kmol) = 215.984  
 Esp(RM062X+D3) (a.u.) = -2270.00734332  
 Esp(D3) (a.u.) = -0.0084580101  
 Esp(RM062X) (a.u.) = -2269.9988853099

Optimised cartesian coordinates (Angstrom):

C 6.688149 -1.107140 0.147616  
 C 6.571793 -2.271192 -0.624532  
 C 5.332593 -2.692089 -1.099393  
 C 4.216051 -1.918654 -0.786224  
 C 4.333869 -0.763796 -0.009845  
 H 7.462339 -2.855161 -0.860086  
 H 5.236972 -3.597070 -1.701096  
 C 2.070467 -0.741188 -0.423261  
 C 0.536092 1.015211 0.319050



|   |           |           |           |
|---|-----------|-----------|-----------|
| C | 1.493992  | 1.106555  | 1.516893  |
| C | 2.936452  | 1.036713  | 1.048549  |
| H | 3.617621  | 0.916455  | 1.901162  |
| S | 2.543477  | -2.219208 | -1.229938 |
| N | 3.097876  | -0.142196 | 0.192002  |
| N | 0.839639  | -0.225628 | -0.436671 |
| C | 1.213760  | 2.314231  | 2.438562  |
| C | 1.968513  | 3.591166  | 2.060089  |
| C | 1.517305  | 1.941854  | 3.889994  |
| H | 0.132443  | 2.517397  | 2.363710  |
| H | 3.047143  | 3.483809  | 2.257060  |
| H | 1.840672  | 3.868863  | 1.003991  |
| H | 1.607544  | 4.429659  | 2.673828  |
| H | 0.897286  | 1.096867  | 4.223569  |
| H | 2.575149  | 1.656153  | 4.007405  |
| H | 1.324661  | 2.793276  | 4.559451  |
| H | 1.291301  | 0.193018  | 2.099152  |
| H | -0.468067 | 0.860900  | 0.738624  |
| C | 0.519367  | 2.234907  | -0.576047 |
| C | -0.504621 | 3.173540  | -0.395813 |
| C | 1.508867  | 2.476684  | -1.535231 |
| C | -0.512399 | 4.357595  | -1.132608 |
| H | -1.303464 | 2.952037  | 0.318021  |
| C | 1.497753  | 3.660051  | -2.274874 |
| H | 2.297721  | 1.741750  | -1.717115 |
| C | 0.494164  | 4.607329  | -2.067177 |
| H | -1.312411 | 5.085033  | -0.982954 |
| H | 2.276321  | 3.841031  | -3.018090 |
| H | 0.488309  | 5.533233  | -2.645099 |
| C | -1.479849 | -0.262275 | -1.186795 |
| H | -1.497883 | 0.823738  | -1.148908 |
| C | -2.673715 | -0.949925 | -1.176534 |
| C | -3.848158 | -0.260291 | -1.807470 |
| F | -3.801286 | -0.408790 | -3.142358 |
| F | -5.040116 | -0.729797 | -1.428677 |
| F | -3.856513 | 1.056967  | -1.573498 |
| O | -0.046068 | -2.145928 | -1.314447 |

|   |           |           |           |
|---|-----------|-----------|-----------|
| C | -0.253821 | -0.981307 | -1.009818 |
| H | 3.240238  | 1.928711  | 0.480608  |
| C | 5.573857  | -0.336987 | 0.467722  |
| H | 5.669278  | 0.570928  | 1.062858  |
| H | 7.669888  | -0.793670 | 0.504985  |
| H | -2.689090 | -2.036044 | -1.304429 |
| C | -0.977391 | -3.865054 | 1.491023  |
| H | -0.557077 | -3.649772 | 2.483884  |
| H | -1.230842 | -4.928972 | 1.419930  |
| H | -0.234378 | -3.601098 | 0.724010  |
| C | -2.076838 | -1.802321 | 1.301475  |
| O | -2.183197 | -3.149913 | 1.279295  |
| O | -1.009481 | -1.260879 | 1.527885  |
| C | -4.639484 | -1.874783 | 1.096338  |
| C | -3.489560 | 0.277785  | 1.211701  |
| C | -5.700345 | -0.776693 | 1.384564  |
| H | -4.889084 | -2.455463 | 0.194648  |
| C | -4.983494 | 0.580884  | 1.315906  |
| H | -6.130965 | -0.929581 | 2.383837  |
| H | -5.154104 | 1.216235  | 2.197615  |
| C | -3.322024 | -1.143416 | 0.960968  |
| O | -2.618408 | 1.137321  | 1.279391  |
| H | -4.590715 | -2.602248 | 1.920927  |
| H | -6.530612 | -0.829316 | 0.668400  |
| H | -5.274036 | 1.176800  | 0.436619  |

-----  
SMDopt/9\_TS\_SRe

Frequencies, energies and thermodynamic properties:

|                                                  |                  |
|--------------------------------------------------|------------------|
| Lowest Vibrational Mode (1/cm) =                 | -110.3919        |
| 2nd Lowest Vibrational Mode (1/cm) =             | 17.7724          |
| E(RM062X) (a.u.) =                               | -2267.74528229   |
| Thermal correction to Enthalpy (a.u.) =          | 0.605813         |
| Thermal correction to Gibbs Free Energy (a.u.) = | 0.500327         |
| Total Entropy (cal/Kmol) =                       | 222.013          |
| Esp(RM062X+D3) (a.u.) =                          | -2270.00346167   |
| Esp(D3) (a.u.) =                                 | -0.0086275392    |
| Esp(RM062X) (a.u.) =                             | -2269.9948341308 |

Optimised cartesian coordinates (Angstrom):

C 6.644471 -1.660591 0.362242  
C 6.428804 -2.856936 -0.338162  
C 5.165360 -3.188003 -0.816005  
C 4.123231 -2.292508 -0.574493  
C 4.338738 -1.107858 0.131204  
H 7.262881 -3.537206 -0.514238  
H 4.993779 -4.115631 -1.363919  
C 2.095606 -0.905560 -0.322011  
C 0.719396 1.036341 0.292341  
C 1.694338 1.148641 1.475541  
C 3.116333 0.899818 1.010786  
H 3.791243 0.798729 1.870162  
S 2.445027 -2.447893 -1.056968  
N 3.162638 -0.363047 0.267349  
N 0.897083 -0.288850 -0.355622  
C 1.545566 2.464856 2.272440  
C 2.422457 3.614140 1.768245  
C 1.827603 2.208954 3.752892  
H 0.490017 2.770477 2.179602  
H 3.485146 3.421613 1.985209  
H 2.321717 3.792634 0.688229  
H 2.146882 4.542688 2.289317  
H 1.131038 1.468033 4.171623  
H 2.853478 1.832873 3.895208  
H 1.728937 3.138472 4.332533  
H 1.422344 0.320480 2.150333  
H -0.289395 1.023575 0.728983  
C 0.806715 2.161388 -0.718005  
C -0.082967 3.235764 -0.607001  
C 1.778136 2.180882 -1.724521  
C 0.016895 4.329244 -1.465580  
H -0.860811 3.210382 0.160034  
C 1.877825 3.275194 -2.584574  
H 2.466518 1.341900 -1.853600  
C 1.003517 4.354316 -2.452193  
H -0.682444 5.161219 -1.367185

H 2.641569 3.281121 -3.364104  
H 1.082871 5.208728 -3.126530  
C -1.442642 -0.160109 -1.102815  
H -1.439267 0.921508 -0.986717  
C -2.613873 -0.808074 -1.292332  
C -3.819185 -0.037088 -1.735333  
F -3.831303 0.036478 -3.082909  
F -4.968097 -0.591381 -1.382864  
F -3.807772 1.225500 -1.295292  
O -0.068625 -2.065984 -1.405510  
C -0.212731 -0.932397 -0.991483  
H 3.495078 1.699662 0.357317  
C 5.606704 -0.768351 0.607971  
H 5.780614 0.162942 1.146629  
H 7.646013 -1.420846 0.721503  
H -2.662519 -1.884400 -1.468023  
C -3.007031 2.287394 1.810347  
H -3.766769 2.443499 2.590049  
H -2.070512 2.772144 2.114649  
H -3.376683 2.740181 0.877901  
C -3.806883 0.115303 1.357711  
O -2.721058 0.915682 1.638394  
O -4.917414 0.604723 1.289527  
C -2.049896 -1.747204 1.595108  
C -4.307660 -2.354007 0.977695  
C -2.020425 -3.211965 1.122125  
H -1.221316 -1.148246 1.172937  
C -3.486713 -3.648073 1.128102  
H -1.375922 -3.846031 1.747792  
H -3.771778 -4.098805 2.094828  
C -3.399485 -1.249413 1.166431  
O -5.515348 -2.367815 0.774375  
H -1.915348 -1.681866 2.692069  
H -1.618441 -3.251566 0.097896  
H -3.756486 -4.371512 0.344174

-----  
SMDopt/9\_TS\_SRF

Frequencies, energies and thermodynamic properties:

|                                                  |                  |
|--------------------------------------------------|------------------|
| Lowest Vibrational Mode (1/cm) =                 | -255.4191        |
| 2nd Lowest Vibrational Mode (1/cm) =             | 14.8717          |
| E(RM062X) (a.u.) =                               | -2267.74704144   |
| Thermal correction to Enthalpy (a.u.) =          | 0.605840         |
| Thermal correction to Gibbs Free Energy (a.u.) = | 0.499913         |
| Total Entropy (cal/Kmol) =                       | 222.941          |
| Esp(RM062X+D3) (a.u.) =                          | -2270.00080092   |
| Esp(D3) (a.u.) =                                 | -0.0081567789    |
| Esp(RM062X) (a.u.) =                             | -2269.9926441411 |

Optimised cartesian coordinates (Angstrom):

|   |          |           |           |
|---|----------|-----------|-----------|
| C | 6.522824 | -2.232582 | 0.316923  |
| C | 6.163894 | -3.415073 | -0.345130 |
| C | 4.856474 | -3.623797 | -0.774696 |
| C | 3.919703 | -2.621079 | -0.527838 |
| C | 4.278297 | -1.448285 | 0.139305  |
| H | 6.917490 | -4.181803 | -0.528854 |
| H | 4.572196 | -4.541421 | -1.292212 |
| C | 2.051617 | -1.021645 | -0.260228 |
| C | 0.924991 | 1.070942  | 0.292608  |
| C | 1.907390 | 1.105033  | 1.473679  |
| C | 3.291516 | 0.688018  | 1.013146  |
| H | 3.951487 | 0.525114  | 1.875093  |
| S | 2.212806 | -2.623519 | -0.941014 |
| N | 3.190590 | -0.581956 | 0.289392  |
| N | 0.939078 | -0.280930 | -0.304922 |
| C | 1.904367 | 2.444632  | 2.244352  |
| C | 2.907045 | 3.478213  | 1.725036  |
| C | 2.143968 | 2.186976  | 3.732127  |
| H | 0.891056 | 2.866363  | 2.136522  |
| H | 3.941150 | 3.167920  | 1.943707  |
| H | 2.824147 | 3.651103  | 0.642298  |
| H | 2.741432 | 4.440196  | 2.231977  |
| H | 1.361656 | 1.540493  | 4.156389  |
| H | 3.116870 | 1.694810  | 3.891684  |
| H | 2.150458 | 3.131999  | 4.295050  |
| H | 1.537651 | 0.326596  | 2.161037  |

|   |           |           |           |
|---|-----------|-----------|-----------|
| H | -0.074226 | 1.182799  | 0.726064  |
| C | 1.136310  | 2.151611  | -0.746632 |
| C | 0.372586  | 3.322063  | -0.668106 |
| C | 2.102472  | 2.034054  | -1.751526 |
| C | 0.591717  | 4.371663  | -1.559028 |
| H | -0.401120 | 3.407445  | 0.099915  |
| C | 2.320692  | 3.083584  | -2.644972 |
| H | 2.693288  | 1.119712  | -1.850886 |
| C | 1.571755  | 4.256594  | -2.546223 |
| H | -0.009262 | 5.279763  | -1.486331 |
| H | 3.078535  | 2.981465  | -3.423664 |
| H | 1.743548  | 5.076168  | -3.246136 |
| C | -1.381379 | 0.047770  | -1.046819 |
| H | -1.232670 | 1.126343  | -1.062166 |
| C | -2.653411 | -0.485803 | -1.058320 |
| C | -3.749757 | 0.220875  | -1.788478 |
| F | -3.544086 | 0.164767  | -3.117364 |
| F | -4.951318 | -0.327090 | -1.581892 |
| F | -3.839881 | 1.520622  | -1.482523 |
| O | -0.262749 | -2.041605 | -1.110026 |
| C | -0.283636 | -0.853604 | -0.840280 |
| H | 3.757459  | 1.431730  | 0.349710  |
| C | 5.588703  | -1.232452 | 0.569573  |
| H | 5.875247  | -0.312613 | 1.079164  |
| H | 7.554472  | -2.088479 | 0.640539  |
| H | -2.732565 | -1.574795 | -1.102115 |
| C | -6.007328 | -3.225519 | 0.795721  |
| H | -5.671145 | -3.905121 | 1.591999  |
| H | -7.094733 | -3.100508 | 0.851129  |
| H | -5.732429 | -3.664037 | -0.174547 |
| C | -4.092910 | -1.868675 | 0.881073  |
| O | -5.444298 | -1.936239 | 0.949534  |
| O | -3.425532 | -2.870185 | 0.729433  |
| C | -4.615460 | 0.622267  | 1.282605  |
| C | -2.374248 | -0.172275 | 1.666816  |
| C | -3.734090 | 1.829511  | 1.637508  |
| H | -5.304835 | 0.829633  | 0.452738  |

|   |           |           |          |
|---|-----------|-----------|----------|
| C | -2.514969 | 1.206335  | 2.312022 |
| H | -4.254523 | 2.562484  | 2.269034 |
| H | -2.698626 | 1.037382  | 3.387910 |
| C | -3.621158 | -0.488982 | 0.986088 |
| O | -1.331394 | -0.810898 | 1.685466 |
| H | -5.245843 | 0.342380  | 2.145666 |
| H | -3.424072 | 2.341783  | 0.714895 |
| H | -1.583168 | 1.786099  | 2.228230 |

-----  
SMDopt/9\_TS\_SSa

Frequencies, energies and thermodynamic properties:

|                                                  |                  |
|--------------------------------------------------|------------------|
| Lowest Vibrational Mode (1/cm) =                 | -207.5653        |
| 2nd Lowest Vibrational Mode (1/cm) =             | 21.3310          |
| E(RM062X) (a.u.) =                               | -2267.75576364   |
| Thermal correction to Enthalpy (a.u.) =          | 0.606165         |
| Thermal correction to Gibbs Free Energy (a.u.) = | 0.502164         |
| Total Entropy (cal/Kmol) =                       | 218.888          |
| Esp(RM062X+D3) (a.u.) =                          | -2270.00874846   |
| Esp(D3) (a.u.) =                                 | -0.0085310700    |
| Esp(RM062X) (a.u.) =                             | -2270.0002173900 |

Optimised cartesian coordinates (Angstrom):

|   |          |           |           |
|---|----------|-----------|-----------|
| C | 6.644296 | -1.417030 | 0.281368  |
| C | 6.474301 | -2.608584 | -0.437604 |
| C | 5.220862 | -2.982858 | -0.913225 |
| C | 4.144237 | -2.135678 | -0.654001 |
| C | 4.315216 | -0.954413 | 0.070321  |
| H | 7.334369 | -3.250953 | -0.630514 |
| H | 5.083775 | -3.908476 | -1.474223 |
| C | 2.061076 | -0.831396 | -0.375179 |
| C | 0.610093 | 1.029915  | 0.279084  |
| C | 1.573238 | 1.140531  | 1.471478  |
| C | 3.008275 | 0.975223  | 1.006174  |
| H | 3.686375 | 0.878090  | 1.863945  |
| S | 2.466018 | -2.360236 | -1.119433 |
| N | 3.111986 | -0.259163 | 0.223751  |
| N | 0.854198 | -0.257085 | -0.414451 |
| C | 1.358830 | 2.411443  | 2.323492  |

|   |           |           |           |
|---|-----------|-----------|-----------|
| C | 2.188228  | 3.619108  | 1.879130  |
| C | 1.635704  | 2.102730  | 3.794926  |
| H | 0.291780  | 2.674593  | 2.231510  |
| H | 3.257452  | 3.461018  | 2.092050  |
| H | 2.083278  | 3.841663  | 0.807514  |
| H | 1.872800  | 4.511138  | 2.440060  |
| H | 0.966136  | 1.315479  | 4.171051  |
| H | 2.674363  | 1.762258  | 3.934490  |
| H | 1.491863  | 3.000055  | 4.414764  |
| H | 1.328619  | 0.270651  | 2.102401  |
| H | -0.395817 | 0.932247  | 0.709742  |
| C | 0.652469  | 2.195877  | -0.686348 |
| C | -0.291788 | 3.220091  | -0.551319 |
| C | 1.633329  | 2.302869  | -1.678734 |
| C | -0.237507 | 4.348207  | -1.368591 |
| H | -1.078328 | 3.126888  | 0.201603  |
| C | 1.687798  | 3.430968  | -2.498369 |
| H | 2.364108  | 1.503600  | -1.826829 |
| C | 0.758409  | 4.459550  | -2.339935 |
| H | -0.979585 | 5.139747  | -1.250468 |
| H | 2.459546  | 3.503795  | -3.266679 |
| H | 0.802179  | 5.340952  | -2.982088 |
| C | -1.487825 | -0.234271 | -1.138275 |
| H | -1.518739 | 0.846355  | -1.029342 |
| C | -2.658231 | -0.935590 | -1.233325 |
| C | -3.871302 | -0.220353 | -1.747546 |
| F | -3.830860 | -0.153328 | -3.091336 |
| F | -5.024470 | -0.816408 | -1.444886 |
| F | -3.945757 | 1.042709  | -1.311854 |
| O | -0.079143 | -2.126265 | -1.336535 |
| C | -0.259413 | -0.971382 | -0.989674 |
| H | 3.349986  | 1.815016  | 0.382891  |
| C | 5.570399  | -0.572871 | 0.547179  |
| H | 5.708128  | 0.355683  | 1.100837  |
| H | 7.636903  | -1.141263 | 0.639779  |
| H | -2.652543 | -2.006962 | -1.449956 |
| C | -3.463527 | 2.154989  | 1.689320  |



|   |           |           |           |
|---|-----------|-----------|-----------|
| H | -4.155256 | 2.151356  | 2.543296  |
| H | -2.588519 | 2.770209  | 1.931061  |
| H | -3.987426 | 2.576743  | 0.818619  |
| C | -3.930555 | -0.093758 | 1.233586  |
| O | -2.982152 | 0.854421  | 1.411787  |
| O | -5.113234 | 0.175411  | 1.330954  |
| C | -4.323323 | -2.598675 | 0.822488  |
| C | -2.075291 | -1.854201 | 1.299174  |
| C | -3.556637 | -3.737898 | 1.523430  |
| H | -5.302018 | -2.393245 | 1.279482  |
| C | -2.085622 | -3.384630 | 1.306863  |
| H | -3.829930 | -4.732981 | 1.145176  |
| H | -1.727773 | -3.720707 | 0.317370  |
| C | -3.393516 | -1.408342 | 0.919538  |
| O | -1.064306 | -1.182705 | 1.495450  |
| H | -4.517478 | -2.870368 | -0.230492 |
| H | -3.778042 | -3.717331 | 2.602366  |
| H | -1.392644 | -3.778799 | 2.063297  |

-----  
SMDopt/9\_TS\_Ssb

Frequencies, energies and thermodynamic properties:

|                                                  |                  |
|--------------------------------------------------|------------------|
| Lowest Vibrational Mode (1/cm) =                 | -244.8447        |
| 2nd Lowest Vibrational Mode (1/cm) =             | 21.1728          |
| E(RM062X) (a.u.) =                               | -2267.75895810   |
| Thermal correction to Enthalpy (a.u.) =          | 0.606082         |
| Thermal correction to Gibbs Free Energy (a.u.) = | 0.502234         |
| Total Entropy (cal/Kmol) =                       | 218.566          |
| Esp(RM062X+D3) (a.u.) =                          | -2270.00859027   |
| Esp(D3) (a.u.) =                                 | -0.0084179371    |
| Esp(RM062X) (a.u.) =                             | -2270.0001723329 |

Optimised cartesian coordinates (Angstrom):

|   |          |           |           |
|---|----------|-----------|-----------|
| C | 6.795897 | -1.032882 | 0.278171  |
| C | 6.724421 | -2.220830 | -0.462409 |
| C | 5.505018 | -2.690787 | -0.942697 |
| C | 4.361939 | -1.942448 | -0.666575 |
| C | 4.435260 | -0.764176 | 0.079353  |
| H | 7.634843 | -2.784710 | -0.669289 |

|   |           |           |           |
|---|-----------|-----------|-----------|
| H | 5.444449  | -3.613967 | -1.520800 |
| C | 2.178020  | -0.819099 | -0.364448 |
| C | 0.590548  | 0.922021  | 0.292778  |
| C | 1.521720  | 1.076220  | 1.505344  |
| C | 2.974517  | 1.023128  | 1.068130  |
| H | 3.640721  | 0.941593  | 1.937147  |
| S | 2.705264  | -2.303044 | -1.125453 |
| N | 3.179187  | -0.174421 | 0.248192  |
| N | 0.933580  | -0.339787 | -0.408067 |
| C | 1.197432  | 2.308293  | 2.378969  |
| C | 1.933700  | 3.587291  | 1.972279  |
| C | 1.477191  | 1.992291  | 3.848399  |
| H | 0.114152  | 2.486509  | 2.275090  |
| H | 3.009491  | 3.510380  | 2.196952  |
| H | 1.824472  | 3.824478  | 0.904257  |
| H | 1.541194  | 4.438934  | 2.547332  |
| H | 0.868046  | 1.145810  | 4.197838  |
| H | 2.537988  | 1.734102  | 3.998096  |
| H | 1.251942  | 2.861642  | 4.483816  |
| H | 1.325657  | 0.178715  | 2.114068  |
| H | -0.417496 | 0.760077  | 0.698636  |
| C | 0.569845  | 2.106085  | -0.649551 |
| C | -0.471348 | 3.034575  | -0.523620 |
| C | 1.570522  | 2.326637  | -1.602399 |
| C | -0.487187 | 4.187522  | -1.308148 |
| H | -1.277297 | 2.830032  | 0.186992  |
| C | 1.551662  | 3.478523  | -2.390056 |
| H | 2.374480  | 1.599342  | -1.743700 |
| C | 0.529527  | 4.416225  | -2.237033 |
| H | -1.301175 | 4.906762  | -1.199769 |
| H | 2.339042  | 3.642158  | -3.127992 |
| H | 0.517638  | 5.317594  | -2.852451 |
| C | -1.373931 | -0.460078 | -1.191047 |
| H | -1.416261 | 0.626223  | -1.189905 |
| C | -2.549364 | -1.171542 | -1.186161 |
| C | -3.737374 | -0.537298 | -1.852327 |
| F | -3.655082 | -0.706244 | -3.184548 |

F -4.915432 -1.046099 -1.491180  
 F -3.798334 0.783975 -1.644986  
 O 0.119203 -2.303992 -1.254148  
 C -0.130537 -1.144461 -0.973119  
 H 3.271302 1.905256 0.481410  
 C 5.655153 -0.287269 0.561135  
 H 5.715372 0.639675 1.131063  
 H 7.762892 -0.680991 0.639926  
 H -2.538867 -2.261831 -1.270007  
 C -5.071687 1.908284 1.016022  
 H -4.599629 2.409683 0.159128  
 H -6.160996 2.011193 0.951558  
 H -4.709850 2.378508 1.941750  
 C -3.490368 0.173522 1.051641  
 O -4.797400 0.520246 1.003700  
 O -2.619192 1.021707 1.146015  
 C -4.391134 -2.289610 1.057869  
 C -2.048571 -1.841765 1.436351  
 C -3.817569 -3.354815 2.012531  
 H -5.333379 -1.855099 1.417560  
 C -2.313728 -3.314204 1.746233  
 H -4.264100 -4.347220 1.859654  
 H -2.051694 -3.899882 0.846596  
 C -3.282619 -1.258831 0.939423  
 O -0.953223 -1.304264 1.546938  
 H -4.606800 -2.754393 0.081119  
 H -4.008666 -3.055822 3.055381  
 H -1.678248 -3.663989 2.571067

-----  
 SMDopt/9\_TS\_SSc

Frequencies, energies and thermodynamic properties:

Lowest Vibrational Mode (1/cm) = -170.7351  
 2nd Lowest Vibrational Mode (1/cm) = 19.3034  
 E(RM062X) (a.u.) = -2267.75273752  
 Thermal correction to Enthalpy (a.u.) = 0.605790  
 Thermal correction to Gibbs Free Energy (a.u.) = 0.500785  
 Total Entropy (cal/Kmol) = 221.000

Esp(RM062X+D3) (a.u.) = -2270.00688117  
Esp(D3) (a.u.) = -0.0083875257  
Esp(RM062X) (a.u.) = -2269.9984936443

Optimised cartesian coordinates (Angstrom):

C 6.603123 -1.610484 0.112837  
C 6.364436 -2.742121 -0.680414  
C 5.086738 -3.028200 -1.151262  
C 4.055766 -2.153102 -0.810470  
C 4.294953 -1.031952 -0.013857  
H 7.190610 -3.406930 -0.935249  
H 4.896366 -3.906208 -1.770231  
C 2.043024 -0.776937 -0.402027  
C 0.699001 1.114656 0.390282  
C 1.680013 1.095313 1.573225  
C 3.098021 0.888624 1.074694  
H 3.779607 0.698620 1.913635  
S 2.361743 -2.269322 -1.251758  
N 3.127972 -0.294572 0.210397  
N 0.861523 -0.140645 -0.382529  
C 1.546116 2.314646 2.512868  
C 2.427875 3.507374 2.133377  
C 1.835607 1.891329 3.953201  
H 0.492515 2.635574 2.463536  
H 3.491031 3.284299 2.316290  
H 2.318236 3.806641 1.081137  
H 2.165123 4.373923 2.757775  
H 1.133980 1.114354 4.290196  
H 2.858162 1.491071 4.045030  
H 1.750034 2.749884 4.635476  
H 1.398623 0.199174 2.149847  
H -0.304626 1.048494 0.827419  
C 0.793124 2.338029 -0.496492  
C -0.081623 3.406256 -0.265681  
C 1.759506 2.453821 -1.501647  
C 0.028172 4.583884 -1.003501  
H -0.854339 3.310784 0.501642  
C 1.868749 3.631986 -2.241527

H 2.436850 1.624464 -1.721401  
C 1.009350 4.701683 -1.989116  
H -0.658538 5.410162 -0.811683  
H 2.628408 3.711903 -3.021030  
H 1.096386 5.622277 -2.568781  
C -1.478359 0.059315 -1.116686  
H -1.428738 1.144127 -1.041208  
C -2.680274 -0.566996 -1.251385  
C -3.839302 0.229586 -1.766088  
F -3.799496 0.275169 -3.109703  
F -5.035349 -0.271073 -1.453931  
F -3.815472 1.500983 -1.347012  
O -0.174555 -1.890834 -1.410590  
C -0.283247 -0.751364 -0.996550  
H 3.476242 1.748554 0.502011  
C 5.575324 -0.739296 0.459239  
H 5.767373 0.142467 1.070264  
H 7.614392 -1.404588 0.465882  
H -2.750713 -1.643865 -1.419366  
C -0.976269 -3.635734 1.181114  
H -0.638257 -3.521027 2.221651  
H -1.175999 -4.694407 0.975959  
H -0.185452 -3.274426 0.508561  
C -2.191493 -1.629463 1.230011  
O -2.193126 -2.951014 0.957967  
O -1.153896 -1.060182 1.564948  
C -3.580781 0.441604 1.591656  
C -4.736825 -1.596107 0.922969  
C -5.084661 0.767926 1.451740  
H -3.261928 0.482109 2.649297  
C -5.791538 -0.589047 1.399358  
H -5.262745 1.314116 0.515960  
H -6.679188 -0.619446 0.750818  
C -3.438129 -0.953127 1.038329  
O -5.015111 -2.725687 0.551923  
H -2.943793 1.172342 1.058778  
H -5.446310 1.405509 2.270395

H -6.109685 -0.920856 2.403093

-----  
SMDopt/9\_TS\_SSd

Frequencies, energies and thermodynamic properties:

Lowest Vibrational Mode (1/cm) = -169.5927  
2nd Lowest Vibrational Mode (1/cm) = 20.6004  
E(RM062X) (a.u.) = -2267.74782113  
Thermal correction to Enthalpy (a.u.) = 0.605738  
Thermal correction to Gibbs Free Energy (a.u.) = 0.501148  
Total Entropy (cal/Kmol) = 220.128  
Esp(RM062X+D3) (a.u.) = -2270.00440341  
Esp(D3) (a.u.) = -0.0085542199  
Esp(RM062X) (a.u.) = -2269.9958491901

Optimised cartesian coordinates (Angstrom):

C 6.627305 -1.499627 0.071026  
C 6.408455 -2.641821 -0.713412  
C 5.133703 -2.963572 -1.167470  
C 4.084717 -2.113616 -0.817116  
C 4.303927 -0.982371 -0.029463  
H 7.248663 -3.286230 -0.974681  
H 4.958225 -3.848924 -1.780348  
C 2.042499 -0.791262 -0.390441  
C 0.654598 1.070276 0.410283  
C 1.668046 1.113745 1.566224  
C 3.077022 0.932333 1.034713  
H 3.784612 0.787501 1.860632  
S 2.391906 -2.271757 -1.244601  
N 3.120064 -0.274466 0.203729  
N 0.836778 -0.193436 -0.346673  
C 1.525102 2.358298 2.472300  
C 2.365437 3.560971 2.034252  
C 1.864447 1.986694 3.916069  
H 0.462458 2.650032 2.441976  
H 3.438147 3.369891 2.196019  
H 2.221447 3.826135 0.977135  
H 2.095979 4.438376 2.640239  
H 1.192612 1.203686 4.296901

|   |           |           |           |
|---|-----------|-----------|-----------|
| H | 2.899121  | 1.615157  | 3.990973  |
| H | 1.775730  | 2.863944  | 4.573556  |
| H | 1.439720  | 0.230760  | 2.184176  |
| H | -0.340073 | 0.992236  | 0.868883  |
| C | 0.693207  | 2.278160  | -0.502922 |
| C | -0.204789 | 3.327098  | -0.274567 |
| C | 1.631369  | 2.394309  | -1.534088 |
| C | -0.145379 | 4.488643  | -1.042792 |
| H | -0.956577 | 3.229072  | 0.513126  |
| C | 1.690296  | 3.556964  | -2.303623 |
| H | 2.325226  | 1.578222  | -1.752744 |
| C | 0.807993  | 4.608611  | -2.055138 |
| H | -0.849898 | 5.300391  | -0.853850 |
| H | 2.428081  | 3.638192  | -3.103647 |
| H | 0.855004  | 5.516616  | -2.658721 |
| C | -1.493059 | -0.007296 | -1.114536 |
| H | -1.453335 | 1.075858  | -1.022185 |
| C | -2.686138 | -0.631729 | -1.288415 |
| C | -3.839287 | 0.195358  | -1.773785 |
| F | -3.821453 | 0.245580  | -3.117428 |
| F | -5.041085 | -0.269235 | -1.439770 |
| F | -3.769248 | 1.463946  | -1.349128 |
| O | -0.143107 | -1.920832 | -1.460305 |
| C | -0.281070 | -0.801878 | -1.008352 |
| H | 3.415273  | 1.784337  | 0.426425  |
| C | 5.582269  | -0.653213 | 0.425586  |
| H | 5.759626  | 0.236669  | 1.029125  |
| H | 7.637229  | -1.265643 | 0.410050  |
| H | -2.764897 | -1.705249 | -1.472594 |
| C | -0.151645 | -2.436690 | 1.713281  |
| H | 0.141640  | -2.901631 | 0.760441  |
| H | 0.684045  | -1.858940 | 2.128332  |
| H | -0.420850 | -3.239994 | 2.414860  |
| C | -2.395532 | -2.107792 | 1.076868  |
| O | -1.229368 | -1.537367 | 1.535463  |
| O | -2.408868 | -3.281501 | 0.758700  |
| C | -3.358401 | 0.208748  | 1.676306  |

C -4.846531 -1.566763 0.934614  
C -4.789991 0.786801 1.591710  
H -3.019285 0.140563 2.726254  
C -5.713422 -0.429152 1.492517  
H -4.890535 1.400859 0.686746  
H -6.606622 -0.277446 0.868833  
C -3.464520 -1.148540 1.033336  
O -5.315856 -2.625399 0.540753  
H -2.620856 0.859741 1.166280  
H -5.025572 1.435171 2.447401  
H -6.062827 -0.757858 2.486880

-----  
SMDopt/9\_TS\_SSe

Frequencies, energies and thermodynamic properties:

Lowest Vibrational Mode (1/cm) = -147.4069  
2nd Lowest Vibrational Mode (1/cm) = 15.5733  
E(RM062X) (a.u.) = -2267.74204313  
Thermal correction to Enthalpy (a.u.) = 0.605427  
Thermal correction to Gibbs Free Energy (a.u.) = 0.498489  
Total Entropy (cal/Kmol) = 225.069  
Esp(RM062X+D3) (a.u.) = -2270.00065106  
Esp(D3) (a.u.) = -0.0082814134  
Esp(RM062X) (a.u.) = -2269.9923696466

Optimised cartesian coordinates (Angstrom):

C 6.656651 -2.139171 0.288399  
C 6.308263 -3.351897 -0.324755  
C 4.998535 -3.602416 -0.720211  
C 4.047334 -2.609269 -0.486678  
C 4.394708 -1.407040 0.131728  
H 7.073997 -4.109177 -0.496869  
H 4.722764 -4.542579 -1.200271  
C 2.154223 -1.044393 -0.228615  
C 0.982470 1.044559 0.302255  
C 2.005216 1.135273 1.445871  
C 3.382051 0.742233 0.945171  
H 4.079328 0.632343 1.785422  
S 2.337118 -2.655858 -0.869575



|   |           |           |           |
|---|-----------|-----------|-----------|
| N | 3.291067  | -0.559218 | 0.275620  |
| N | 1.013097  | -0.328939 | -0.258239 |
| C | 1.995889  | 2.495478  | 2.180033  |
| C | 2.944344  | 3.541491  | 1.588012  |
| C | 2.314051  | 2.285900  | 3.660821  |
| H | 0.965805  | 2.883532  | 2.109365  |
| H | 3.994959  | 3.267523  | 1.773739  |
| H | 2.813767  | 3.678506  | 0.505091  |
| H | 2.770062  | 4.513099  | 2.072973  |
| H | 1.574642  | 1.628372  | 4.140949  |
| H | 3.308941  | 1.829063  | 3.785676  |
| H | 2.317332  | 3.246523  | 4.196452  |
| H | 1.690790  | 0.366561  | 2.171134  |
| H | -0.005858 | 1.155184  | 0.766160  |
| C | 1.134461  | 2.096179  | -0.776393 |
| C | 0.356829  | 3.257397  | -0.699091 |
| C | 2.060521  | 1.961144  | -1.815931 |
| C | 0.524449  | 4.283158  | -1.627960 |
| H | -0.385241 | 3.354555  | 0.098091  |
| C | 2.227584  | 2.987825  | -2.746109 |
| H | 2.659468  | 1.052142  | -1.915795 |
| C | 1.466112  | 4.152815  | -2.649917 |
| H | -0.086587 | 5.184538  | -1.556784 |
| H | 2.954936  | 2.873490  | -3.551600 |
| H | 1.597815  | 4.954145  | -3.378996 |
| C | -1.323752 | -0.039717 | -0.972510 |
| H | -1.184066 | 1.038847  | -1.034180 |
| C | -2.567834 | -0.575257 | -1.074951 |
| C | -3.660760 | 0.235520  | -1.698264 |
| F | -3.542550 | 0.200547  | -3.042249 |
| F | -4.878683 | -0.216462 | -1.424864 |
| F | -3.602748 | 1.524839  | -1.355086 |
| O | -0.159320 | -2.103769 | -1.073117 |
| C | -0.182510 | -0.922660 | -0.787961 |
| H | 3.799663  | 1.469886  | 0.233676  |
| C | 5.709307  | -1.149353 | 0.526281  |
| H | 5.988253  | -0.206663 | 0.996708  |

|   |           |           |           |
|---|-----------|-----------|-----------|
| H | 7.691698  | -1.964194 | 0.584516  |
| H | -2.718663 | -1.657802 | -1.080053 |
| C | -6.495465 | -2.625608 | 0.221449  |
| H | -6.479458 | -3.537033 | 0.837133  |
| H | -7.517074 | -2.229234 | 0.179479  |
| H | -6.162081 | -2.890517 | -0.793577 |
| C | -4.371701 | -1.882492 | 0.859816  |
| O | -5.690180 | -1.607747 | 0.775111  |
| O | -3.952359 | -3.006101 | 0.617218  |
| C | -2.220884 | -1.010513 | 1.918103  |
| C | -3.958378 | 0.610964  | 1.423304  |
| C | -1.954491 | 0.275179  | 2.729255  |
| H | -2.234852 | -1.911286 | 2.551821  |
| C | -2.741840 | 1.355192  | 1.991222  |
| H | -0.880895 | 0.499481  | 2.826618  |
| H | -2.170399 | 1.743649  | 1.125514  |
| C | -3.540614 | -0.764614 | 1.240133  |
| O | -5.016980 | 1.165282  | 1.162700  |
| H | -1.393222 | -1.165385 | 1.198425  |
| H | -2.360499 | 0.162232  | 3.746803  |
| H | -3.050425 | 2.213954  | 2.603355  |

-----  
SMDopt/9\_TS\_SSf

Frequencies, energies and thermodynamic properties:

|                                                  |                  |
|--------------------------------------------------|------------------|
| Lowest Vibrational Mode (1/cm) =                 | -70.4079         |
| 2nd Lowest Vibrational Mode (1/cm) =             | 20.3431          |
| E(RM062X) (a.u.) =                               | -2267.73863405   |
| Thermal correction to Enthalpy (a.u.) =          | 0.606192         |
| Thermal correction to Gibbs Free Energy (a.u.) = | 0.499059         |
| Total Entropy (cal/Kmol) =                       | 225.481          |
| Esp(RM062X+D3) (a.u.) =                          | -2269.99985163   |
| Esp(D3) (a.u.) =                                 | -0.0080510114    |
| Esp(RM062X) (a.u.) =                             | -2269.9918006186 |

Optimised cartesian coordinates (Angstrom):

|   |          |           |           |
|---|----------|-----------|-----------|
| C | 6.362074 | -2.705879 | 0.187178  |
| C | 5.838313 | -3.862736 | -0.411153 |
| C | 4.497260 | -3.938431 | -0.768775 |

|   |           |           |           |
|---|-----------|-----------|-----------|
| C | 3.693462  | -2.827504 | -0.510036 |
| C | 4.213966  | -1.682467 | 0.094104  |
| H | 6.492364  | -4.714238 | -0.602438 |
| H | 4.084587  | -4.832828 | -1.237380 |
| C | 2.033360  | -1.029079 | -0.199764 |
| C | 1.156607  | 1.197579  | 0.381718  |
| C | 2.243517  | 1.163153  | 1.467618  |
| C | 3.529224  | 0.588768  | 0.907655  |
| H | 4.248770  | 0.397817  | 1.713499  |
| S | 1.990074  | -2.637601 | -0.865207 |
| N | 3.236551  | -0.696719 | 0.265573  |
| N | 0.981610  | -0.173873 | -0.169665 |
| C | 2.452238  | 2.522036  | 2.174303  |
| C | 3.492688  | 3.427648  | 1.510175  |
| C | 2.825118  | 2.289363  | 3.638581  |
| H | 1.479613  | 3.040476  | 2.153429  |
| H | 4.508195  | 3.021767  | 1.641931  |
| H | 3.318173  | 3.568672  | 0.433954  |
| H | 3.473809  | 4.419109  | 1.985745  |
| H | 2.035701  | 1.738599  | 4.170512  |
| H | 3.758710  | 1.709331  | 3.716327  |
| H | 2.982423  | 3.247567  | 4.154998  |
| H | 1.870210  | 0.451857  | 2.222597  |
| H | 0.225848  | 1.438457  | 0.907566  |
| C | 1.374863  | 2.209994  | -0.723195 |
| C | 0.751258  | 3.459145  | -0.624915 |
| C | 2.216498  | 1.949134  | -1.810154 |
| C | 0.989818  | 4.445253  | -1.580423 |
| H | 0.073814  | 3.657761  | 0.209743  |
| C | 2.453937  | 2.936352  | -2.767177 |
| H | 2.694256  | 0.972837  | -1.927579 |
| C | 1.847787  | 4.187458  | -2.650535 |
| H | 0.498994  | 5.415854  | -1.491734 |
| H | 3.113946  | 2.723378  | -3.609679 |
| H | 2.034249  | 4.957668  | -3.400841 |
| C | -1.348113 | 0.409831  | -0.763481 |
| H | -1.151318 | 1.464096  | -0.575301 |

|   |           |           |           |
|---|-----------|-----------|-----------|
| C | -2.587069 | 0.008451  | -1.080077 |
| C | -3.645121 | 1.038947  | -1.349964 |
| F | -3.497174 | 1.524202  | -2.598414 |
| F | -4.873585 | 0.556904  | -1.274106 |
| F | -3.550038 | 2.087599  | -0.528316 |
| O | -0.374952 | -1.714457 | -1.144255 |
| C | -0.261742 | -0.586368 | -0.719460 |
| H | 3.999698  | 1.246066  | 0.161233  |
| C | 5.562483  | -1.599780 | 0.449241  |
| H | 5.977355  | -0.702123 | 0.906654  |
| H | 7.419558  | -2.669511 | 0.451648  |
| H | -2.833878 | -1.033015 | -1.300350 |
| C | -4.963442 | -3.743617 | -0.899472 |
| H | -5.356580 | -3.227531 | -1.788519 |
| H | -4.305675 | -4.563307 | -1.214735 |
| H | -5.818140 | -4.154455 | -0.340801 |
| C | -4.849521 | -1.782196 | 0.411846  |
| O | -4.186567 | -2.881675 | -0.099949 |
| O | -6.021815 | -1.611036 | 0.129417  |
| C | -2.641942 | -1.498625 | 1.718796  |
| C | -4.329282 | 0.262136  | 1.806401  |
| C | -2.037173 | -0.317853 | 2.523025  |
| H | -2.751299 | -2.393960 | 2.359360  |
| C | -3.150528 | 0.725523  | 2.684881  |
| H | -1.184277 | 0.111348  | 1.976092  |
| H | -2.850347 | 1.739535  | 2.373577  |
| C | -3.974493 | -0.992140 | 1.225890  |
| O | -5.350518 | 0.941099  | 1.699672  |
| H | -1.971421 | -1.809921 | 0.900410  |
| H | -1.639391 | -0.653398 | 3.491454  |
| H | -3.514527 | 0.813473  | 3.722072  |

-----

SMDopt/19\_TS\_SRa

Frequencies, energies and thermodynamic properties:

|                                      |                |
|--------------------------------------|----------------|
| Lowest Vibrational Mode (1/cm) =     | -119.9580      |
| 2nd Lowest Vibrational Mode (1/cm) = | 16.5634        |
| E(RM062X) (a.u.) =                   | -2588.54508528 |

Thermal correction to Enthalpy (a.u.) = 0.662787  
Thermal correction to Gibbs Free Energy (a.u.) = 0.547893  
Total Entropy (cal/Kmol) = 241.814  
Esp(RM062X+D3) (a.u.) = -2591.15471684  
Esp(D3) (a.u.) = -0.0108280698  
Esp(RM062X) (a.u.) = -2591.1438887702

Optimised cartesian coordinates (Angstrom):

C -6.997464 -1.861531 -0.560607  
C -6.740234 -3.140731 -0.044646  
C -5.469593 -3.490179 0.399826  
C -4.462946 -2.528378 0.312359  
C -4.719410 -1.260142 -0.210547  
H -7.547745 -3.871595 0.013181  
H -5.265425 -4.481811 0.806236  
C -2.492995 -1.038439 0.311436  
C -1.184105 1.016821 -0.002308  
C -2.163177 1.277408 -1.157651  
C -3.575046 0.906049 -0.748061  
H -4.243994 0.914276 -1.618073  
S -2.788028 -2.686103 0.803400  
N -3.574452 -0.457354 -0.210241  
N -1.319143 -0.389288 0.450591  
C -2.062968 2.711232 -1.728315  
C -3.003802 3.724383 -1.071128  
C -2.292174 2.687700 -3.239041  
H -1.028015 3.046476 -1.553413  
H -4.053606 3.517100 -1.332780  
H -2.921088 3.737206 0.025370  
H -2.769945 4.735004 -1.436884  
H -1.551221 2.053468 -3.748458  
H -3.294060 2.295748 -3.477478  
H -2.221588 3.702226 -3.658795  
H -1.849297 0.576084 -1.947107  
H -0.182563 1.091446 -0.440875  
C -1.284627 1.990001 1.152238  
C -0.413380 3.085389 1.182473  
C -2.251693 1.855468 2.153431

|   |           |           |           |
|---|-----------|-----------|-----------|
| C | -0.531131 | 4.052771  | 2.179199  |
| H | 0.363132  | 3.175517  | 0.416146  |
| C | -2.367480 | 2.822747  | 3.152632  |
| H | -2.923376 | 0.992863  | 2.165531  |
| C | -1.513951 | 3.926448  | 3.162444  |
| H | 0.151318  | 4.904304  | 2.191852  |
| H | -3.127246 | 2.710706  | 3.928009  |
| H | -1.606552 | 4.682092  | 3.944462  |
| C | 1.008123  | -0.297425 | 1.261189  |
| H | 0.978194  | 0.790241  | 1.300740  |
| C | 2.175058  | -0.953087 | 1.502474  |
| C | 3.250778  | -0.276622 | 2.296586  |
| F | 2.919046  | -0.317757 | 3.604905  |
| F | 4.432479  | -0.864430 | 2.197590  |
| F | 3.391223  | 1.018341  | 1.995453  |
| O | -0.330795 | -2.245162 | 1.317848  |
| C | -0.203398 | -1.070177 | 1.030341  |
| H | -3.987018 | 1.577828  | 0.019749  |
| C | -5.995085 | -0.902084 | -0.651769 |
| H | -6.202647 | 0.092456  | -1.046121 |
| H | -8.004312 | -1.609696 | -0.896000 |
| H | 2.210408  | -2.043821 | 1.550743  |
| C | 5.574429  | -3.761955 | -0.307499 |
| H | 6.149137  | -3.667896 | -1.239978 |
| H | 6.258862  | -3.876243 | 0.540278  |
| H | 4.924923  | -4.645411 | -0.383796 |
| C | 3.935992  | -2.248277 | -1.005201 |
| O | 4.816107  | -2.591501 | -0.054951 |
| O | 3.727091  | -2.953233 | -1.971759 |
| C | 4.205077  | 0.210881  | -0.544710 |
| O | 5.347787  | 0.275127  | -0.112846 |
| C | 3.332169  | -0.943935 | -0.735978 |
| N | 2.193542  | -0.523904 | -1.496244 |
| C | 2.253625  | 0.875785  | -1.671428 |
| C | 1.373857  | 1.765069  | -2.307502 |
| C | 3.427629  | 1.357044  | -1.079791 |
| C | 1.708574  | 3.120710  | -2.306626 |

|   |           |           |           |
|---|-----------|-----------|-----------|
| H | 0.465737  | 1.415205  | -2.789467 |
| C | 3.752509  | 2.710315  | -1.083886 |
| C | 2.877103  | 3.602558  | -1.698995 |
| H | 1.033896  | 3.822657  | -2.802747 |
| H | 4.679334  | 3.044308  | -0.612647 |
| H | 3.100158  | 4.670425  | -1.720618 |
| C | 1.047076  | -1.249628 | -1.770731 |
| O | 0.111063  | -0.737390 | -2.368493 |
| C | 0.979525  | -2.695321 | -1.354245 |
| H | 1.419664  | -3.309457 | -2.150365 |
| H | 1.517906  | -2.912887 | -0.425827 |
| H | -0.080092 | -2.950666 | -1.239703 |

-----  
 SMDopt/19\_TS\_SRb

Frequencies, energies and thermodynamic properties:

|                                                  |                  |
|--------------------------------------------------|------------------|
| Lowest Vibrational Mode (1/cm) =                 | -193.5624        |
| 2nd Lowest Vibrational Mode (1/cm) =             | 20.8586          |
| E(RM062X) (a.u.) =                               | -2588.54503130   |
| Thermal correction to Enthalpy (a.u.) =          | 0.662954         |
| Thermal correction to Gibbs Free Energy (a.u.) = | 0.549685         |
| Total Entropy (cal/Kmol) =                       | 238.395          |
| Esp(RM062X+D3) (a.u.) =                          | -2591.15277943   |
| Esp(D3) (a.u.) =                                 | -0.0101582670    |
| Esp(RM062X) (a.u.) =                             | -2591.1426211630 |

Optimised cartesian coordinates (Angstrom):

|   |          |           |           |
|---|----------|-----------|-----------|
| C | 7.333418 | -2.072553 | 0.717428  |
| C | 7.066819 | -3.302526 | 0.098916  |
| C | 5.803564 | -3.586970 | -0.410866 |
| C | 4.815963 | -2.610151 | -0.288490 |
| C | 5.082398 | -1.390242 | 0.335321  |
| H | 7.859372 | -4.046904 | 0.012913  |
| H | 5.591381 | -4.541765 | -0.894423 |
| C | 2.878933 | -1.074282 | -0.245660 |
| C | 1.627731 | 0.994925  | 0.129225  |
| C | 2.531559 | 1.121617  | 1.367206  |
| C | 3.958096 | 0.750123  | 1.008914  |
| H | 4.575181 | 0.666729  | 1.912792  |

|   |           |           |           |
|---|-----------|-----------|-----------|
| S | 3.146822  | -2.700507 | -0.823745 |
| N | 3.956589  | -0.561137 | 0.356382  |
| N | 1.743297  | -0.380026 | -0.407707 |
| C | 2.430600  | 2.487398  | 2.082982  |
| C | 3.407143  | 3.547647  | 1.566327  |
| C | 2.623500  | 2.297167  | 3.588033  |
| H | 1.403176  | 2.854820  | 1.918403  |
| H | 4.442049  | 3.297462  | 1.848574  |
| H | 3.372281  | 3.671575  | 0.474723  |
| H | 3.171120  | 4.520082  | 2.022779  |
| H | 1.864095  | 1.621534  | 4.009079  |
| H | 3.615874  | 1.869133  | 3.802547  |
| H | 2.554513  | 3.261155  | 4.113275  |
| H | 2.157163  | 0.354769  | 2.066242  |
| H | 0.594615  | 1.083050  | 0.488616  |
| C | 1.858583  | 2.041693  | -0.940569 |
| C | 1.054599  | 3.187664  | -0.945948 |
| C | 2.877246  | 1.918094  | -1.890960 |
| C | 1.283177  | 4.208252  | -1.867271 |
| H | 0.243113  | 3.277974  | -0.218706 |
| C | 3.106003  | 2.939692  | -2.813935 |
| H | 3.500759  | 1.020790  | -1.924816 |
| C | 2.314704  | 4.088587  | -2.800047 |
| H | 0.650214  | 5.097292  | -1.860302 |
| H | 3.905147  | 2.833718  | -3.549580 |
| H | 2.494367  | 4.885607  | -3.523596 |
| C | -0.512323 | -0.166483 | -1.358611 |
| H | -0.375053 | 0.906030  | -1.488130 |
| C | -1.762005 | -0.736079 | -1.415498 |
| C | -2.820284 | -0.086220 | -2.254703 |
| F | -2.542369 | -0.238595 | -3.559195 |
| F | -4.034839 | -0.610704 | -2.071029 |
| F | -2.921363 | 1.231830  | -2.042763 |
| O | 0.669732  | -2.215651 | -1.223415 |
| C | 0.597668  | -1.019918 | -1.016509 |
| H | 4.425680  | 1.478762  | 0.329812  |
| C | 6.348273  | -1.098416 | 0.846063  |



|   |           |           |           |
|---|-----------|-----------|-----------|
| H | 6.562064  | -0.141641 | 1.322305  |
| H | 8.332729  | -1.870673 | 1.105232  |
| H | -1.829983 | -1.827253 | -1.375829 |
| C | -0.856059 | 0.675665  | 3.290710  |
| H | -0.073361 | 1.177775  | 2.701857  |
| H | -1.228018 | 1.358215  | 4.062858  |
| H | -0.430873 | -0.223334 | 3.757485  |
| C | -1.730058 | -0.511255 | 1.462373  |
| O | -1.966731 | 0.353290  | 2.468815  |
| O | -0.677060 | -1.101249 | 1.358722  |
| C | -3.478128 | -1.971582 | 0.428648  |
| O | -2.922362 | -3.051370 | 0.298978  |
| C | -2.858632 | -0.636951 | 0.534236  |
| N | -3.932620 | 0.318961  | 0.659355  |
| C | -5.164215 | -0.354277 | 0.640638  |
| C | -6.475910 | 0.136722  | 0.704430  |
| C | -4.935945 | -1.731735 | 0.501669  |
| C | -7.516406 | -0.791148 | 0.643913  |
| H | -6.674379 | 1.198541  | 0.807782  |
| C | -5.982786 | -2.647702 | 0.436236  |
| C | -7.287775 | -2.169079 | 0.513274  |
| H | -8.543746 | -0.425733 | 0.704028  |
| H | -5.766378 | -3.712274 | 0.325407  |
| H | -8.132681 | -2.857976 | 0.470422  |
| C | -3.808166 | 1.698581  | 0.689374  |
| O | -4.779822 | 2.411691  | 0.846964  |
| C | -2.436242 | 2.309428  | 0.516333  |
| H | -2.132880 | 2.749956  | 1.476620  |
| H | -1.663550 | 1.612798  | 0.176835  |
| H | -2.537172 | 3.122739  | -0.214206 |

-----  
SMDopt/19\_TS\_SRc

Frequencies, energies and thermodynamic properties:

|                                         |                |
|-----------------------------------------|----------------|
| Lowest Vibrational Mode (1/cm) =        | -252.3809      |
| 2nd Lowest Vibrational Mode (1/cm) =    | 15.3415        |
| E(RM062X) (a.u.) =                      | -2588.54425600 |
| Thermal correction to Enthalpy (a.u.) = | 0.663231       |

Thermal correction to Gibbs Free Energy (a.u.) = 0.547191  
Total Entropy (cal/Kmol) = 244.227  
Esp(RM062X+D3) (a.u.) = -2591.14842125  
Esp(D3) (a.u.) = -0.0100255757  
Esp(RM062X) (a.u.) = -2591.1383956743

Optimised cartesian coordinates (Angstrom):

C -6.637487 2.900736 0.207671  
C -6.134981 3.954491 -0.568374  
C -4.835106 3.917738 -1.065194  
C -4.052785 2.802885 -0.767695  
C -4.552935 1.759527 0.013655  
H -6.769380 4.813651 -0.789670  
H -4.439247 4.734204 -1.671084  
C -2.442493 0.954763 -0.432741  
C -1.585294 -1.210008 0.319265  
C -2.525814 -0.980274 1.513624  
C -3.856006 -0.425381 1.037956  
H -4.462620 -0.096362 1.891690  
S -2.391217 2.499825 -1.250836  
N -3.605537 0.747569 0.197639  
N -1.458951 0.051386 -0.444612  
C -2.681698 -2.217455 2.426451  
C -3.832959 -3.149294 2.038941  
C -2.840556 -1.772764 3.880583  
H -1.739374 -2.784975 2.349325  
H -4.806574 -2.675065 2.240605  
H -3.810166 -3.443981 0.979952  
H -3.785664 -4.066610 2.644048  
H -1.966666 -1.198372 4.221126  
H -3.733330 -1.137798 3.999169  
H -2.958501 -2.642814 4.543224  
H -2.035449 -0.190355 2.105570  
H -0.587302 -1.386958 0.743224  
C -1.973505 -2.364267 -0.582080  
C -1.379747 -3.615046 -0.378742  
C -2.944477 -2.227329 -1.580441  
C -1.772097 -4.718436 -1.135051

H -0.601012 -3.721504 0.380051  
C -3.337042 -3.330831 -2.339084  
H -3.402834 -1.255387 -1.780954  
C -2.757931 -4.579908 -2.113219  
H -1.301393 -5.688138 -0.963988  
H -4.097431 -3.211396 -3.112835  
H -3.065715 -5.441930 -2.707633  
C 0.766484 -0.678784 -1.176130  
H 0.519216 -1.715980 -0.966992  
C 2.086715 -0.306488 -1.349345  
C 3.039868 -1.298907 -1.941774  
F 2.617609 -1.716993 -3.144131  
F 4.251948 -0.766945 -2.142173  
F 3.199768 -2.403990 -1.200708  
O -0.052886 1.514673 -1.493633  
C -0.196621 0.374142 -1.076593  
H -4.435609 -1.157518 0.456125  
C -5.856998 1.788951 0.510804  
H -6.255937 0.969154 1.107887  
H -7.661115 2.947713 0.581484  
H 2.296313 0.711836 -1.689284  
C 1.973719 -3.077027 2.145228  
H 2.176975 -2.834174 3.196794  
H 0.967586 -3.498727 2.048827  
H 2.719578 -3.805729 1.797276  
C 3.125350 -1.189501 1.400322  
O 2.001209 -1.907567 1.339576  
O 4.065644 -1.510571 2.090270  
C 1.924885 0.938109 0.977985  
O 0.792083 0.611532 1.311318  
C 3.028320 0.047548 0.591980  
N 4.200237 0.870412 0.428577  
C 3.809352 2.225163 0.491564  
C 4.537806 3.407663 0.276928  
C 2.445200 2.302418 0.809323  
C 3.860941 4.619373 0.405372  
H 5.592503 3.384574 0.027933

|   |          |           |           |
|---|----------|-----------|-----------|
| C | 1.777900 | 3.519982  | 0.936078  |
| C | 2.496956 | 4.690925  | 0.731049  |
| H | 4.419140 | 5.544351  | 0.246294  |
| H | 0.713296 | 3.529397  | 1.177736  |
| H | 2.009225 | 5.662993  | 0.817661  |
| C | 5.517022 | 0.490222  | 0.170825  |
| O | 6.378199 | 1.338501  | 0.049082  |
| C | 5.903785 | -0.964526 | 0.071658  |
| H | 6.390842 | -1.239735 | 1.016778  |
| H | 5.090955 | -1.665654 | -0.107801 |
| H | 6.644384 | -1.033141 | -0.734976 |

-----  
 SMDopt/19\_TS\_SRd

Frequencies, energies and thermodynamic properties:

|                                                  |                  |
|--------------------------------------------------|------------------|
| Lowest Vibrational Mode (1/cm) =                 | -264.7702        |
| 2nd Lowest Vibrational Mode (1/cm) =             | 15.4407          |
| E(RM062X) (a.u.) =                               | -2588.54572600   |
| Thermal correction to Enthalpy (a.u.) =          | 0.662901         |
| Thermal correction to Gibbs Free Energy (a.u.) = | 0.547592         |
| Total Entropy (cal/Kmol) =                       | 242.689          |
| Esp(RM062X+D3) (a.u.) =                          | -2591.14814177   |
| Esp(D3) (a.u.) =                                 | -0.0098471990    |
| Esp(RM062X) (a.u.) =                             | -2591.1382945710 |

Optimised cartesian coordinates (Angstrom):

|   |           |           |           |
|---|-----------|-----------|-----------|
| C | -7.013090 | 2.372894  | 0.376105  |
| C | -6.691320 | 3.437632  | -0.476652 |
| C | -5.428697 | 3.531711  | -1.055739 |
| C | -4.499151 | 2.535125  | -0.762699 |
| C | -4.819671 | 1.480264  | 0.094617  |
| H | -7.438381 | 4.202336  | -0.692618 |
| H | -5.173653 | 4.358152  | -1.720865 |
| C | -2.657270 | 0.912080  | -0.454045 |
| C | -1.504233 | -1.103519 | 0.317197  |
| C | -2.377980 | -0.918448 | 1.568415  |
| C | -3.795574 | -0.547970 | 1.170289  |
| H | -4.378463 | -0.245854 | 2.050145  |
| S | -2.840604 | 2.415007  | -1.329659 |

|   |           |           |           |
|---|-----------|-----------|-----------|
| N | -3.746386 | 0.599505  | 0.260460  |
| N | -1.577899 | 0.130093  | -0.501148 |
| C | -2.319415 | -2.111712 | 2.548185  |
| C | -3.371284 | -3.194392 | 2.292936  |
| C | -2.430968 | -1.608225 | 3.987479  |
| H | -1.321862 | -2.565983 | 2.428284  |
| H | -4.379778 | -2.830324 | 2.546022  |
| H | -3.386039 | -3.542230 | 1.250077  |
| H | -3.168907 | -4.064790 | 2.934385  |
| H | -1.612165 | -0.916425 | 4.233660  |
| H | -3.384197 | -1.077717 | 4.143360  |
| H | -2.395507 | -2.447619 | 4.697619  |
| H | -1.943544 | -0.046194 | 2.083491  |
| H | -0.463891 | -1.152959 | 0.666186  |
| C | -1.817540 | -2.342239 | -0.494695 |
| C | -1.039863 | -3.488010 | -0.286342 |
| C | -2.879723 | -2.394021 | -1.403728 |
| C | -1.346099 | -4.678804 | -0.943869 |
| H | -0.181951 | -3.430656 | 0.388771  |
| C | -3.183485 | -3.585165 | -2.064728 |
| H | -3.479264 | -1.503671 | -1.610758 |
| C | -2.424897 | -4.732149 | -1.828239 |
| H | -0.735310 | -5.566794 | -0.771068 |
| H | -4.016475 | -3.615110 | -2.769391 |
| H | -2.665292 | -5.663120 | -2.344792 |
| C | 0.633361  | -0.400692 | -1.388270 |
| H | 0.434480  | -1.459845 | -1.247893 |
| C | 1.941339  | 0.027481  | -1.531134 |
| C | 2.890858  | -0.855450 | -2.279152 |
| F | 2.518541  | -0.972406 | -3.562634 |
| F | 4.137093  | -0.367161 | -2.304080 |
| F | 2.951066  | -2.101061 | -1.792446 |
| O | -0.368357 | 1.738669  | -1.592070 |
| C | -0.387471 | 0.582196  | -1.199701 |
| H | -4.321563 | -1.373783 | 0.668325  |
| C | -6.084981 | 1.379544  | 0.675069  |
| H | -6.342075 | 0.550104  | 1.333600  |

|   |           |           |           |
|---|-----------|-----------|-----------|
| H | -8.010238 | 2.316383  | 0.814605  |
| H | 2.121076  | 1.084098  | -1.752751 |
| C | 3.692558  | -2.806918 | 2.509788  |
| H | 3.644325  | -3.604168 | 1.754374  |
| H | 4.613273  | -2.900495 | 3.095184  |
| H | 2.818229  | -2.885306 | 3.169911  |
| C | 2.720046  | -1.221838 | 1.080575  |
| O | 3.742659  | -1.529295 | 1.887223  |
| O | 1.732891  | -1.913675 | 0.987681  |
| C | 1.882822  | 1.069811  | 0.877948  |
| O | 0.712979  | 0.841832  | 1.160051  |
| C | 2.878118  | 0.092037  | 0.417984  |
| N | 4.150653  | 0.766392  | 0.385129  |
| C | 3.932330  | 2.144380  | 0.588494  |
| C | 4.814815  | 3.235142  | 0.528077  |
| C | 2.575698  | 2.365757  | 0.875183  |
| C | 4.293786  | 4.505174  | 0.771519  |
| H | 5.867665  | 3.098300  | 0.308251  |
| C | 2.066029  | 3.640397  | 1.119453  |
| C | 2.938136  | 4.721117  | 1.065258  |
| H | 4.972081  | 5.360057  | 0.732601  |
| H | 1.003611  | 3.765930  | 1.337516  |
| H | 2.576196  | 5.734155  | 1.246648  |
| C | 5.414985  | 0.238364  | 0.130086  |
| O | 6.389085  | 0.963418  | 0.138278  |
| C | 5.598849  | -1.237239 | -0.133480 |
| H | 6.063436  | -1.678901 | 0.758980  |
| H | 4.696720  | -1.800268 | -0.374808 |
| H | 6.312094  | -1.317160 | -0.963579 |

-----

SMDopt/19\_TS\_SRe

Frequencies, energies and thermodynamic properties:

|                                                  |                |
|--------------------------------------------------|----------------|
| Lowest Vibrational Mode (1/cm) =                 | -263.9181      |
| 2nd Lowest Vibrational Mode (1/cm) =             | 13.7755        |
| E(RM062X) (a.u.) =                               | -2588.54082071 |
| Thermal correction to Enthalpy (a.u.) =          | 0.662656       |
| Thermal correction to Gibbs Free Energy (a.u.) = | 0.547101       |

|                            |                  |
|----------------------------|------------------|
| Total Entropy (cal/Kmol) = | 243.206          |
| Esp(RM062X+D3) (a.u.) =    | -2591.14730940   |
| Esp(D3) (a.u.) =           | -0.0105640750    |
| Esp(RM062X) (a.u.) =       | -2591.1367453250 |

Optimised cartesian coordinates (Angstrom):

|   |          |           |           |
|---|----------|-----------|-----------|
| C | 6.493628 | -2.786333 | -0.131564 |
| C | 5.903337 | -3.957674 | -0.628337 |
| C | 4.542107 | -4.005842 | -0.911145 |
| C | 3.785280 | -2.856949 | -0.680414 |
| C | 4.374374 | -1.696149 | -0.177289 |
| H | 6.518387 | -4.841923 | -0.799830 |
| H | 4.078221 | -4.912178 | -1.303085 |
| C | 2.195831 | -0.986094 | -0.398379 |
| C | 1.395429 | 1.269162  | 0.158503  |
| C | 2.576372 | 1.273097  | 1.144801  |
| C | 3.800210 | 0.649317  | 0.503362  |
| H | 4.593207 | 0.504185  | 1.247365  |
| S | 2.069465 | -2.631775 | -0.966216 |
| N | 3.438948 | -0.669134 | -0.019463 |
| N | 1.179870 | -0.106683 | -0.351725 |
| C | 2.869486 | 2.658092  | 1.764676  |
| C | 3.820125 | 3.534979  | 0.942968  |
| C | 3.433244 | 2.490093  | 3.176420  |
| H | 1.899028 | 3.176312  | 1.847785  |
| H | 4.846089 | 3.135168  | 0.976924  |
| H | 3.526216 | 3.628697  | -0.111500 |
| H | 3.851745 | 4.546486  | 1.373944  |
| H | 2.734140 | 1.952440  | 3.832612  |
| H | 4.380413 | 1.927643  | 3.155279  |
| H | 3.639595 | 3.471406  | 3.628368  |
| H | 2.265608 | 0.605552  | 1.965611  |
| H | 0.507805 | 1.512016  | 0.755603  |
| C | 1.507842 | 2.266349  | -0.975599 |
| C | 0.889888 | 3.514588  | -0.840567 |
| C | 2.254953 | 1.994078  | -2.125933 |
| C | 1.046795 | 4.490760  | -1.822831 |
| H | 0.282007 | 3.719522  | 0.045106  |

C 2.411315 2.970881 -3.110418  
H 2.719980 1.014960 -2.267922  
C 1.815280 4.222933 -2.957164  
H 0.562468 5.461680 -1.705223  
H 2.999325 2.749410 -4.002738  
H 1.938485 4.985577 -3.728100  
C -1.150874 0.489294 -0.884718  
H -0.985394 1.519724 -0.584780  
C -2.416561 0.062057 -1.231686  
C -3.410461 1.075055 -1.708563  
F -3.167179 1.396574 -2.993092  
F -4.669826 0.631317 -1.672729  
F -3.358065 2.217483 -1.019643  
O -0.218019 -1.641482 -1.289951  
C -0.109478 -0.496349 -0.873886  
H 4.199787 1.255437 -0.323618  
C 5.741922 -1.639090 0.100341  
H 6.209657 -0.730220 0.477705  
H 7.564297 -2.769262 0.076105  
H -2.524821 -0.913888 -1.709322  
C -6.607999 -2.044486 -0.683879  
H -6.544151 -3.141217 -0.703132  
H -7.571885 -1.733050 -0.267603  
H -6.500312 -1.664189 -1.709528  
C -4.349247 -1.679783 -0.223857  
O -5.610640 -1.490325 0.161075  
O -4.065373 -2.404098 -1.154902  
C -3.818939 0.400388 1.221179  
O -4.853499 1.043898 1.124577  
C -3.408692 -0.838905 0.546589  
N -2.187311 -1.295388 1.148901  
C -1.676929 -0.241902 1.930742  
C -0.476926 -0.131471 2.655937  
C -2.624985 0.789936 1.995710  
C -0.263709 1.039526 3.380536  
H 0.266152 -0.921910 2.644202  
C -2.392269 1.962769 2.711962



C -1.192285 2.093491 3.403117  
H 0.666977 1.138056 3.943417  
H -3.153034 2.746282 2.722896  
H -0.974122 2.998673 3.971967  
C -1.585056 -2.554693 1.148542  
O -0.442165 -2.679111 1.537520  
C -2.392570 -3.748891 0.723569  
H -3.416370 -3.716834 1.118131  
H -2.449734 -3.796839 -0.369954  
H -1.871177 -4.633720 1.105067

-----  
SMDopt/19\_TS\_SRF

Frequencies, energies and thermodynamic properties:

Lowest Vibrational Mode (1/cm) = -227.1419  
2nd Lowest Vibrational Mode (1/cm) = 12.6648  
E(RM062X) (a.u.) = -2588.54192707  
Thermal correction to Enthalpy (a.u.) = 0.662665  
Thermal correction to Gibbs Free Energy (a.u.) = 0.546685  
Total Entropy (cal/Kmol) = 244.099  
Esp(RM062X+D3) (a.u.) = -2591.14642658  
Esp(D3) (a.u.) = -0.0102537526  
Esp(RM062X) (a.u.) = -2591.1361728274

Optimised cartesian coordinates (Angstrom):

C -7.258365 -1.604067 -0.968264  
C -7.163176 -2.782967 -0.214539  
C -5.983790 -3.116583 0.444044  
C -4.903481 -2.242088 0.330142  
C -4.998216 -1.074235 -0.428717  
H -8.024820 -3.447466 -0.140001  
H -5.905588 -4.031216 1.033244  
C -2.839320 -0.883474 0.338263  
C -1.377175 1.030280 -0.102846  
C -2.141075 1.103552 -1.433667  
C -3.623318 0.877259 -1.204057  
H -4.146386 0.731896 -2.158281  
S -3.306530 -2.413747 1.036602  
N -3.803092 -0.347840 -0.417759

|   |           |           |           |
|---|-----------|-----------|-----------|
| N | -1.655311 | -0.281469 | 0.533824  |
| C | -1.840931 | 2.385302  | -2.243080 |
| C | -2.770047 | 3.562508  | -1.935579 |
| C | -1.874271 | 2.074362  | -3.739713 |
| H | -0.809845 | 2.679703  | -1.985028 |
| H | -3.786092 | 3.370585  | -2.315698 |
| H | -2.843793 | 3.783849  | -0.861200 |
| H | -2.399210 | 4.467022  | -2.439799 |
| H | -1.125941 | 1.314037  | -4.006440 |
| H | -2.865942 | 1.698711  | -4.039458 |
| H | -1.667460 | 2.979559  | -4.329565 |
| H | -1.760213 | 0.250673  | -2.019554 |
| H | -0.311375 | 1.017488  | -0.366993 |
| C | -1.635927 | 2.180209  | 0.848855  |
| C | -0.729729 | 3.247747  | 0.868204  |
| C | -2.771884 | 2.233047  | 1.664730  |
| C | -0.977275 | 4.368295  | 1.660827  |
| H | 0.177608  | 3.182578  | 0.262145  |
| C | -3.016730 | 3.353709  | 2.459290  |
| H | -3.479982 | 1.400692  | 1.693268  |
| C | -2.125696 | 4.427512  | 2.451675  |
| H | -0.266176 | 5.196439  | 1.665876  |
| H | -3.907951 | 3.385411  | 3.088480  |
| H | -2.320173 | 5.303978  | 3.072369  |
| C | 0.566650  | -0.184936 | 1.545410  |
| H | 0.527683  | 0.901713  | 1.536114  |
| C | 1.788492  | -0.803314 | 1.603787  |
| C | 2.903205  | -0.074849 | 2.301179  |
| F | 2.721510  | -0.138842 | 3.631862  |
| F | 4.114810  | -0.587768 | 2.071980  |
| F | 2.959302  | 1.220830  | 1.987557  |
| O | -0.831211 | -2.107058 | 1.624947  |
| C | -0.620661 | -0.958450 | 1.282257  |
| H | -4.100595 | 1.709030  | -0.664944 |
| C | -6.180829 | -0.732577 | -1.087692 |
| H | -6.262144 | 0.185524  | -1.669099 |
| H | -8.195193 | -1.360915 | -1.471257 |

|   |           |           |           |
|---|-----------|-----------|-----------|
| H | 1.864597  | -1.895086 | 1.637047  |
| C | -0.242699 | -2.702459 | -1.444843 |
| H | -0.004181 | -2.977258 | -2.483102 |
| H | -0.630983 | -3.574201 | -0.907880 |
| H | -0.998511 | -1.903792 | -1.466788 |
| C | 1.507693  | -1.161737 | -1.180923 |
| O | 0.922226  | -2.290792 | -0.754081 |
| O | 1.013891  | -0.471723 | -2.048124 |
| C | 3.692395  | -2.003056 | -0.227138 |
| O | 3.469251  | -3.140661 | 0.163106  |
| C | 2.750473  | -0.903573 | -0.455512 |
| N | 3.513432  | 0.249016  | -0.869455 |
| C | 4.879165  | -0.093249 | -0.922891 |
| C | 6.026382  | 0.654717  | -1.229293 |
| C | 5.023307  | -1.440227 | -0.548806 |
| C | 7.265087  | 0.013141  | -1.177560 |
| H | 5.996131  | 1.702157  | -1.510037 |
| C | 6.263225  | -2.068498 | -0.490667 |
| C | 7.399246  | -1.333911 | -0.817350 |
| H | 8.156403  | 0.591410  | -1.428959 |
| H | 6.320368  | -3.116637 | -0.189498 |
| H | 8.387564  | -1.794798 | -0.788552 |
| C | 2.934347  | 1.506829  | -0.957007 |
| O | 1.812043  | 1.703871  | -0.535093 |
| C | 3.727270  | 2.615853  | -1.597156 |
| H | 4.480570  | 2.999014  | -0.893630 |
| H | 4.230633  | 2.288790  | -2.515190 |
| H | 3.026030  | 3.425606  | -1.826307 |

-----  
SMDopt/19\_TS\_SRg

Frequencies, energies and thermodynamic properties:

|                                                  |                |
|--------------------------------------------------|----------------|
| Lowest Vibrational Mode (1/cm) =                 | -160.1619      |
| 2nd Lowest Vibrational Mode (1/cm) =             | 18.2142        |
| E(RM062X) (a.u.) =                               | -2588.54058228 |
| Thermal correction to Enthalpy (a.u.) =          | 0.662743       |
| Thermal correction to Gibbs Free Energy (a.u.) = | 0.548653       |
| Total Entropy (cal/Kmol) =                       | 240.121        |

Esp(RM062X+D3) (a.u.) = -2591.14820184

Esp(D3) (a.u.) = -0.0101543283

Esp(RM062X) (a.u.) = -2591.1380475117

Optimised cartesian coordinates (Angstrom):

C 7.419676 -1.711339 0.715460

C 7.240572 -2.961827 0.106513

C 6.001878 -3.336721 -0.404744

C 4.948480 -2.429862 -0.292761

C 5.128284 -1.189080 0.320863

H 8.082582 -3.650791 0.029542

H 5.858212 -4.307552 -0.880994

C 2.910485 -1.030484 -0.267228

C 1.504350 0.945695 0.102799

C 2.409908 1.150589 1.330607

C 3.857848 0.876608 0.968800

H 4.481820 0.847703 1.871248

S 3.291842 -2.638064 -0.833749

N 3.948488 -0.438589 0.331043

N 1.727991 -0.419744 -0.432446

C 2.223251 2.515187 2.032259

C 3.093801 3.645133 1.473912

C 2.483597 2.366979 3.532345

H 1.164648 2.796063 1.896181

H 4.153713 3.484789 1.727408

H 3.016586 3.754629 0.383235

H 2.792028 4.599709 1.929434

H 1.807614 1.630690 3.991433

H 3.518821 2.038347 3.717116

H 2.342651 3.329126 4.046389

H 2.098021 0.368398 2.042926

H 0.466248 0.955213 0.465454

C 1.648695 2.003040 -0.971831

C 0.727385 3.057021 -1.000751

C 2.697832 1.983158 -1.896764

C 0.879667 4.099403 -1.914225

H -0.121733 3.041657 -0.311251

C 2.847689 3.026190 -2.811665

H 3.408166 1.152285 -1.917429  
C 1.946298 4.091217 -2.814798  
H 0.158099 4.918271 -1.927894  
H 3.672152 3.003941 -3.526433  
H 2.065930 4.906721 -3.530238  
C -0.525202 -0.348397 -1.397270  
H -0.459360 0.731537 -1.512373  
C -1.739334 -0.962529 -1.450766  
C -2.832734 -0.311123 -2.243967  
F -2.605070 -0.477185 -3.559215  
F -4.042041 -0.827225 -2.014567  
F -2.918501 1.007438 -2.042571  
O 0.792830 -2.315590 -1.283526  
C 0.640368 -1.133499 -1.053949  
H 4.271630 1.629348 0.281433  
C 6.369503 -0.806475 0.832345  
H 6.514589 0.167186 1.299812  
H 8.401267 -1.437683 1.104438  
H -1.816213 -2.050865 -1.368462  
C -0.676914 0.306411 3.361123  
H -0.030082 0.971110 2.769760  
H -1.029583 0.842150 4.249870  
H -0.106533 -0.582629 3.663536  
C -1.615927 -0.776893 1.504176  
O -1.825768 -0.039582 2.612077  
O -0.564706 -1.347191 1.305990  
C -3.565484 -2.047887 0.519667  
O -3.166754 -3.204622 0.407919  
C -2.796274 -0.823868 0.637903  
N -3.710208 0.281000 0.737703  
C -5.027774 -0.202785 0.684539  
C -6.271032 0.444999 0.710090  
C -4.981492 -1.604917 0.560173  
C -7.422995 -0.340365 0.635047  
H -6.376068 1.521768 0.798385  
C -6.136461 -2.375973 0.478247  
C -7.372463 -1.735789 0.521429

|   |           |           |           |
|---|-----------|-----------|-----------|
| H | -8.393110 | 0.159339  | 0.669474  |
| H | -6.053384 | -3.460519 | 0.380101  |
| H | -8.297728 | -2.311020 | 0.464716  |
| C | -3.217223 | 1.573243  | 0.675126  |
| O | -2.017868 | 1.764489  | 0.573940  |
| C | -4.195615 | 2.713233  | 0.730293  |
| H | -4.856378 | 2.693870  | -0.148064 |
| H | -4.814073 | 2.665124  | 1.636508  |
| H | -3.621145 | 3.645405  | 0.728598  |

-----

SMDopt/19\_TS\_SRh

Frequencies, energies and thermodynamic properties:

|                                                  |                  |
|--------------------------------------------------|------------------|
| Lowest Vibrational Mode (1/cm) =                 | -178.5570        |
| 2nd Lowest Vibrational Mode (1/cm) =             | 17.5755          |
| E(RM062X) (a.u.) =                               | -2588.53806246   |
| Thermal correction to Enthalpy (a.u.) =          | 0.662914         |
| Thermal correction to Gibbs Free Energy (a.u.) = | 0.548144         |
| Total Entropy (cal/Kmol) =                       | 241.555          |
| Esp(RM062X+D3) (a.u.) =                          | -2591.14743648   |
| Esp(D3) (a.u.) =                                 | -0.0107052412    |
| Esp(RM062X) (a.u.) =                             | -2591.1367312388 |

Optimised cartesian coordinates (Angstrom):

|   |          |           |           |
|---|----------|-----------|-----------|
| C | 6.497605 | -2.798803 | -0.291247 |
| C | 5.898143 | -3.962496 | -0.795535 |
| C | 4.530229 | -4.011599 | -1.042487 |
| C | 3.777744 | -2.869537 | -0.768493 |
| C | 4.375258 | -1.716599 | -0.257835 |
| H | 6.511553 | -4.840624 | -1.000791 |
| H | 4.058991 | -4.912115 | -1.438788 |
| C | 2.190816 | -1.009683 | -0.400224 |
| C | 1.405734 | 1.236225  | 0.212142  |
| C | 2.598631 | 1.210361  | 1.182263  |
| C | 3.813540 | 0.606511  | 0.505826  |
| H | 4.615811 | 0.436149  | 1.234567  |
| S | 2.053531 | -2.646457 | -0.993896 |
| N | 3.441165 | -0.696355 | -0.050791 |
| N | 1.171775 | -0.132756 | -0.313753 |

|   |           |           |           |
|---|-----------|-----------|-----------|
| C | 2.894315  | 2.579017  | 1.836955  |
| C | 3.865459  | 3.461610  | 1.047001  |
| C | 3.428745  | 2.373541  | 3.254742  |
| H | 1.928277  | 3.105853  | 1.914426  |
| H | 4.886619  | 3.050160  | 1.086096  |
| H | 3.585309  | 3.578345  | -0.009211 |
| H | 3.901393  | 4.464217  | 1.497777  |
| H | 2.700796  | 1.846554  | 3.888246  |
| H | 4.358808  | 1.782754  | 3.240616  |
| H | 3.654896  | 3.341033  | 3.726495  |
| H | 2.301009  | 0.517374  | 1.985654  |
| H | 0.525948  | 1.478090  | 0.822796  |
| C | 1.524328  | 2.250002  | -0.906949 |
| C | 0.932147  | 3.507613  | -0.744266 |
| C | 2.252620  | 1.982668  | -2.070315 |
| C | 1.095348  | 4.495989  | -1.713089 |
| H | 0.337377  | 3.709507  | 0.151003  |
| C | 2.415279  | 2.971997  | -3.041223 |
| H | 2.697872  | 0.998064  | -2.234955 |
| C | 1.844698  | 4.232081  | -2.861021 |
| H | 0.630531  | 5.473564  | -1.574193 |
| H | 2.988174  | 2.753510  | -3.944012 |
| H | 1.972528  | 5.004400  | -3.621462 |
| C | -1.136681 | 0.517721  | -0.863068 |
| H | -0.914517 | 1.548480  | -0.603725 |
| C | -2.398839 | 0.178277  | -1.257122 |
| C | -3.318186 | 1.256190  | -1.743911 |
| F | -3.071061 | 1.511912  | -3.044195 |
| F | -4.607023 | 0.928067  | -1.673042 |
| F | -3.149071 | 2.410222  | -1.096013 |
| O | -0.284273 | -1.673514 | -1.147672 |
| C | -0.130115 | -0.515904 | -0.795560 |
| H | 4.204401  | 1.234379  | -0.308683 |
| C | 5.749335  | -1.659282 | -0.015819 |
| H | 6.223175  | -0.756371 | 0.368093  |
| H | 7.573324  | -2.782279 | -0.111751 |
| H | -2.605928 | -0.817122 | -1.649499 |

C -5.260446 -2.897261 -1.700782  
 H -6.053475 -2.300302 -2.172702  
 H -4.737945 -3.487919 -2.461467  
 H -5.714544 -3.566069 -0.955720  
 C -4.721211 -1.309524 -0.068718  
 O -4.287774 -2.065912 -1.095970  
 O -5.896188 -1.182382 0.175240  
 C -3.772882 0.679854 1.268725  
 O -4.667445 1.519516 1.182583  
 C -3.632918 -0.612523 0.638861  
 N -2.479205 -1.282684 1.156034  
 C -1.755246 -0.353179 1.925463  
 C -0.533258 -0.454898 2.613802  
 C -2.497721 0.840407 2.005276  
 C -0.092197 0.653917 3.333683  
 H 0.079950 -1.351316 2.604929  
 C -2.027490 1.951796 2.703147  
 C -0.810170 1.860028 3.371497  
 H 0.850631 0.574900 3.878442  
 H -2.629701 2.862883 2.724598  
 H -0.418238 2.708642 3.934962  
 C -2.424179 -2.674061 1.279439  
 O -3.409693 -3.350581 1.083367  
 C -1.102005 -3.294352 1.644259  
 H -0.271986 -2.832677 1.095282  
 H -0.920181 -3.201655 2.724825  
 H -1.164685 -4.359968 1.396427

-----

SMDopt/19\_TS\_SRi

Frequencies, energies and thermodynamic properties:

Lowest Vibrational Mode (1/cm) = -204.7138  
 2nd Lowest Vibrational Mode (1/cm) = 15.6928  
 E(RM062X) (a.u.) = -2588.53811167  
 Thermal correction to Enthalpy (a.u.) = 0.662829  
 Thermal correction to Gibbs Free Energy (a.u.) = 0.548170  
 Total Entropy (cal/Kmol) = 241.320  
 Esp(RM062X+D3) (a.u.) = -2591.14698976



Esp(D3) (a.u.) = -0.0106457719

Esp(RM062X) (a.u.) = -2591.1363439881

Optimised cartesian coordinates (Angstrom):

C 6.636717 -2.610094 -0.380026  
C 6.084327 -3.768874 -0.945256  
C 4.720800 -3.855427 -1.207144  
C 3.924463 -2.756080 -0.886687  
C 4.475860 -1.607494 -0.317611  
H 6.730963 -4.613431 -1.186311  
H 4.286277 -4.752399 -1.650656  
C 2.268121 -0.972260 -0.449022  
C 1.398150 1.213034 0.253458  
C 2.583218 1.187523 1.233388  
C 3.825011 0.657704 0.543252  
H 4.626649 0.485464 1.272206  
S 2.193742 -2.586146 -1.114778  
N 3.504476 -0.631186 -0.074064  
N 1.219218 -0.137432 -0.335920  
C 2.823601 2.535631 1.950194  
C 3.766873 3.488302 1.209393  
C 3.355651 2.287076 3.361882  
H 1.838224 3.022710 2.042453  
H 4.801881 3.112056 1.237103  
H 3.489342 3.644442 0.157663  
H 3.764003 4.469235 1.706891  
H 2.645580 1.701883 3.963702  
H 4.309326 1.736032 3.328716  
H 3.538440 3.240097 3.879700  
H 2.303956 0.449511 2.002829  
H 0.503988 1.394172 0.864650  
C 1.488727 2.282291 -0.815888  
C 0.847374 3.507657 -0.600938  
C 2.236965 2.098193 -1.982697  
C 0.979816 4.545874 -1.521100  
H 0.237489 3.644144 0.296612  
C 2.368766 3.137472 -2.905038  
H 2.722439 1.140702 -2.188527

C 1.747850 4.364788 -2.672719  
H 0.476325 5.497363 -1.341555  
H 2.957192 2.983820 -3.811196  
H 1.851599 5.176017 -3.395385  
C -1.102963 0.449737 -0.880898  
H -0.909987 1.479633 -0.597796  
C -2.367675 0.082910 -1.267317  
C -3.290485 1.160482 -1.755017  
F -3.031393 1.431170 -3.048849  
F -4.581290 0.829922 -1.700540  
F -3.135726 2.308584 -1.092113  
O -0.175538 -1.700373 -1.236365  
C -0.069392 -0.548411 -0.844056  
H 4.199849 1.335278 -0.238305  
C 5.844608 -1.512838 -0.058663  
H 6.280885 -0.612385 0.372716  
H 7.709569 -2.563173 -0.189027  
H -2.542535 -0.901315 -1.706090  
C -6.789939 -1.561978 -0.882403  
H -6.848415 -2.658892 -0.919464  
H -7.734099 -1.151547 -0.507795  
H -6.593452 -1.185542 -1.896607  
C -4.529818 -1.468753 -0.315656  
O -5.780991 -1.134230 0.016412  
O -4.282730 -2.192497 -1.254528  
C -3.731881 0.486414 1.224367  
O -4.639618 1.308491 1.156376  
C -3.538438 -0.774112 0.524957  
N -2.387288 -1.439296 1.050248  
C -1.704670 -0.528003 1.875685  
C -0.493618 -0.632512 2.582584  
C -2.478133 0.641080 1.997526  
C -0.094488 0.452108 3.361213  
H 0.141865 -1.512652 2.543144  
C -2.050964 1.729749 2.756099  
C -0.843786 1.636896 3.442367  
H 0.840101 0.371189 3.919795

|   |           |           |          |
|---|-----------|-----------|----------|
| H | -2.676719 | 2.623469  | 2.808796 |
| H | -0.483772 | 2.467383  | 4.052110 |
| C | -2.308914 | -2.836156 | 1.140472 |
| O | -3.286863 | -3.521433 | 0.952625 |
| C | -0.967889 | -3.440260 | 1.462769 |
| H | -0.150635 | -2.919016 | 0.950647 |
| H | -0.792372 | -3.418856 | 2.548317 |
| H | -1.000142 | -4.488416 | 1.143789 |

-----  
SMDopt/19\_TS\_SRj

Frequencies, energies and thermodynamic properties:

|                                                  |                  |
|--------------------------------------------------|------------------|
| Lowest Vibrational Mode (1/cm) =                 | -223.4471        |
| 2nd Lowest Vibrational Mode (1/cm) =             | 16.9051          |
| E(RM062X) (a.u.) =                               | -2588.53851927   |
| Thermal correction to Enthalpy (a.u.) =          | 0.662842         |
| Thermal correction to Gibbs Free Energy (a.u.) = | 0.546802         |
| Total Entropy (cal/Kmol) =                       | 244.225          |
| Esp(RM062X+D3) (a.u.) =                          | -2591.14422452   |
| Esp(D3) (a.u.) =                                 | -0.0099610310    |
| Esp(RM062X) (a.u.) =                             | -2591.1342634890 |

Optimised cartesian coordinates (Angstrom):

|   |           |           |           |
|---|-----------|-----------|-----------|
| C | -6.592374 | 2.946278  | 0.207460  |
| C | -6.084687 | 3.987071  | -0.582505 |
| C | -4.788330 | 3.932775  | -1.086941 |
| C | -4.014743 | 2.813586  | -0.782987 |
| C | -4.519961 | 1.783301  | 0.012418  |
| H | -6.712205 | 4.849983  | -0.808768 |
| H | -4.388762 | 4.739294  | -1.703591 |
| C | -2.420339 | 0.953008  | -0.438609 |
| C | -1.583065 | -1.214228 | 0.327264  |
| C | -2.508170 | -0.959153 | 1.528190  |
| C | -3.836706 | -0.395041 | 1.058930  |
| H | -4.431496 | -0.048289 | 1.914011  |
| S | -2.358737 | 2.489635  | -1.272176 |
| N | -3.581272 | 0.764466  | 0.201757  |
| N | -1.447595 | 0.038565  | -0.449373 |
| C | -2.669078 | -2.182117 | 2.458827  |

C -3.832680 -3.107427 2.093205  
C -2.811898 -1.715989 3.907917  
H -1.733017 -2.759914 2.382414  
H -4.799879 -2.621385 2.297610  
H -3.822239 -3.415156 1.037751  
H -3.788857 -4.017727 2.709089  
H -1.929631 -1.145790 4.233535  
H -3.697363 -1.070549 4.024814  
H -2.933101 -2.575620 4.583461  
H -2.000821 -0.167849 2.103800  
H -0.583789 -1.398155 0.744377  
C -1.994322 -2.371418 -0.559689  
C -1.413309 -3.627161 -0.350369  
C -2.972737 -2.232176 -1.550447  
C -1.825080 -4.732728 -1.093056  
H -0.629144 -3.734902 0.402486  
C -3.384816 -3.337813 -2.295514  
H -3.421118 -1.256656 -1.755893  
C -2.818151 -4.591488 -2.063496  
H -1.363984 -5.706246 -0.917519  
H -4.150729 -3.216558 -3.063521  
H -3.141262 -5.455117 -2.647354  
C 0.770595 -0.721297 -1.183499  
H 0.508441 -1.755639 -0.976711  
C 2.087526 -0.368267 -1.378031  
C 3.043673 -1.379834 -1.949476  
F 2.524329 -1.934422 -3.064110  
F 4.188597 -0.810337 -2.329347  
F 3.330742 -2.399963 -1.141128  
O -0.025776 1.479883 -1.507719  
C -0.182550 0.345326 -1.081639  
H -4.429965 -1.127815 0.491710  
C -5.820523 1.830300 0.517295  
H -6.223262 1.020498 1.125414  
H -7.613167 3.006914 0.587045  
H 2.310720 0.647771 -1.713359  
C 2.114796 -3.181903 2.043782

|   |          |           |           |
|---|----------|-----------|-----------|
| H | 2.235451 | -2.969563 | 3.115135  |
| H | 1.160080 | -3.690406 | 1.871526  |
| H | 2.943410 | -3.826189 | 1.716535  |
| C | 3.164578 | -1.203295 | 1.398443  |
| O | 2.080639 | -1.983514 | 1.286874  |
| O | 4.089723 | -1.480892 | 2.121805  |
| C | 1.898344 | 0.906088  | 0.979538  |
| O | 0.761610 | 0.558375  | 1.299360  |
| C | 3.017971 | 0.048770  | 0.619734  |
| N | 4.168637 | 0.886661  | 0.452026  |
| C | 3.761614 | 2.230190  | 0.489942  |
| C | 4.449788 | 3.427683  | 0.229089  |
| C | 2.390970 | 2.281732  | 0.803256  |
| C | 3.747332 | 4.625881  | 0.337479  |
| H | 5.496589 | 3.458116  | -0.055841 |
| C | 1.697631 | 3.487027  | 0.907896  |
| C | 2.385868 | 4.671527  | 0.678383  |
| H | 4.281440 | 5.558180  | 0.143767  |
| H | 0.633060 | 3.475564  | 1.150001  |
| H | 1.875387 | 5.633113  | 0.748298  |
| C | 5.438079 | 0.359710  | 0.191888  |
| O | 5.573902 | -0.810860 | -0.070886 |
| C | 6.621018 | 1.289625  | 0.284708  |
| H | 6.714851 | 1.881481  | -0.637091 |
| H | 6.550704 | 1.972302  | 1.140431  |
| H | 7.513669 | 0.661598  | 0.379845  |

-----  
SMDopt/19\_TS\_SRk

Frequencies, energies and thermodynamic properties:

|                                                  |                |
|--------------------------------------------------|----------------|
| Lowest Vibrational Mode (1/cm) =                 | -357.7970      |
| 2nd Lowest Vibrational Mode (1/cm) =             | 13.7217        |
| E(RM062X) (a.u.) =                               | -2588.53394785 |
| Thermal correction to Enthalpy (a.u.) =          | 0.662380       |
| Thermal correction to Gibbs Free Energy (a.u.) = | 0.546341       |
| Total Entropy (cal/Kmol) =                       | 244.226        |
| Esp(RM062X+D3) (a.u.) =                          | -2591.13703547 |
| Esp(D3) (a.u.) =                                 | -0.0098557117  |

Esp(RM062X) (a.u.) = -2591.1271797583

Optimised cartesian coordinates (Angstrom):

|   |          |           |           |
|---|----------|-----------|-----------|
| C | 7.042605 | -2.322095 | 0.189957  |
| C | 6.676825 | -3.408312 | -0.616288 |
| C | 5.379653 | -3.526034 | -1.108771 |
| C | 4.460989 | -2.531750 | -0.777069 |
| C | 4.825809 | -1.455457 | 0.034803  |
| H | 7.415865 | -4.170973 | -0.864673 |
| H | 5.089729 | -4.369333 | -1.737461 |
| C | 2.625872 | -0.917961 | -0.384655 |
| C | 1.499833 | 1.099187  | 0.418936  |
| C | 2.456809 | 0.948156  | 1.613907  |
| C | 3.850377 | 0.585756  | 1.131634  |
| H | 4.492068 | 0.308019  | 1.978037  |
| S | 2.766751 | -2.441424 | -1.234759 |
| N | 3.756482 | -0.580989 | 0.251224  |
| N | 1.540478 | -0.145863 | -0.384416 |
| C | 2.449334 | 2.157396  | 2.575831  |
| C | 3.465074 | 3.249868  | 2.230992  |
| C | 2.669648 | 1.680357  | 4.011753  |
| H | 1.439563 | 2.596426  | 2.520065  |
| H | 4.493919 | 2.903259  | 2.418035  |
| H | 3.401919 | 3.581780  | 1.184783  |
| H | 3.295595 | 4.127316  | 2.872379  |
| H | 1.881158 | 0.981297  | 4.326662  |
| H | 3.639785 | 1.166747  | 4.109022  |
| H | 2.670940 | 2.531506  | 4.708666  |
| H | 2.069305 | 0.080740  | 2.172876  |
| H | 0.482567 | 1.135873  | 0.832795  |
| C | 1.736444 | 2.333565  | -0.424705 |
| C | 0.948930 | 3.465299  | -0.178775 |
| C | 2.736790 | 2.396432  | -1.400248 |
| C | 1.187151 | 4.654738  | -0.865925 |
| H | 0.135212 | 3.396663  | 0.548642  |
| C | 2.973024 | 3.586618  | -2.090327 |
| H | 3.339375 | 1.515362  | -1.636027 |
| C | 2.207049 | 4.720461  | -1.817117 |

H 0.569531 5.531774 -0.663487  
H 3.758686 3.626229 -2.846989  
H 2.394864 5.650520 -2.356588  
C -0.690924 0.357394 -1.230554  
H -0.474159 1.417845 -1.133323  
C -2.022411 -0.058535 -1.325522  
C -2.927358 0.802532 -2.170028  
F -2.713991 0.511724 -3.466927  
F -4.230036 0.620686 -1.965670  
F -2.673654 2.110908 -2.038113  
O 0.273727 -1.804178 -1.333965  
C 0.314967 -0.622040 -1.017914  
H 4.333278 1.407229 0.581567  
C 6.125498 -1.330567 0.527913  
H 6.417987 -0.484227 1.149180  
H 8.065708 -2.246468 0.560587  
H -2.207816 -1.118370 -1.532222  
C -3.733260 3.474886 0.453989  
H -2.862067 3.845735 -0.103751  
H -4.654273 3.874116 0.016056  
H -3.650117 3.792774 1.502614  
C -2.784914 1.368702 0.819279  
O -3.827822 2.063450 0.361682  
O -1.793810 1.899505 1.271825  
C -1.874653 -1.021685 1.083121  
O -0.728087 -0.788473 1.432101  
C -2.880588 -0.080526 0.570144  
N -4.124842 -0.785616 0.429008  
C -3.819643 -2.170874 0.466135  
C -4.613415 -3.283076 0.160117  
C -2.490662 -2.351453 0.879977  
C -4.042548 -4.547997 0.298672  
H -5.636682 -3.190320 -0.195930  
C -1.926389 -3.619166 1.008641  
C -2.715671 -4.727041 0.719300  
H -4.649021 -5.422970 0.057070  
H -0.884121 -3.718673 1.318005

H -2.306110 -5.734636 0.803321  
C -5.296734 -0.331059 1.091108  
O -5.239584 0.507408 1.953542  
C -6.594147 -0.953217 0.649955  
H -6.592688 -1.181186 -0.422375  
H -6.774877 -1.880573 1.213742  
H -7.400404 -0.250006 0.889466

-----  
SMDopt/19\_TS\_SRI

Frequencies, energies and thermodynamic properties:

Lowest Vibrational Mode (1/cm) = -381.1376  
2nd Lowest Vibrational Mode (1/cm) = 18.4780  
E(RM062X) (a.u.) = -2588.53087598  
Thermal correction to Enthalpy (a.u.) = 0.662320  
Thermal correction to Gibbs Free Energy (a.u.) = 0.548078  
Total Entropy (cal/Kmol) = 240.441  
Esp(RM062X+D3) (a.u.) = -2591.13495821  
Esp(D3) (a.u.) = -0.0104546268  
Esp(RM062X) (a.u.) = -2591.1245035832

Optimised cartesian coordinates (Angstrom):

C -7.379297 -1.022159 -0.475881  
C -7.293871 -2.287677 0.120822  
C -6.074299 -2.781920 0.575371  
C -4.945191 -1.979366 0.420159  
C -5.032385 -0.723314 -0.183095  
H -8.193528 -2.893784 0.234054  
H -6.002745 -3.765636 1.041418  
C -2.784173 -0.781140 0.306517  
C -1.236861 1.056875 -0.101890  
C -2.142451 1.341197 -1.310685  
C -3.600271 1.204846 -0.912093  
H -4.248364 1.215172 -1.798266  
S -3.291663 -2.352887 0.880876  
N -3.787808 -0.089235 -0.248772  
N -1.550327 -0.285497 0.430360  
C -1.819482 2.674519 -2.021112  
C -2.579475 3.884373 -1.471184



C -2.077227 2.539709 -3.522078  
H -0.737933 2.848140 -1.880738  
H -3.649344 3.823200 -1.726787  
H -2.494819 3.987584 -0.380128  
H -2.187495 4.805439 -1.927064  
H -1.458632 1.745489 -3.965425  
H -3.134304 2.297412 -3.716986  
H -1.848834 3.482044 -4.041638  
H -1.922816 0.527042 -2.022084  
H -0.219018 0.977047 -0.499184  
C -1.256669 2.115566 0.981203  
C -0.252486 3.090957 0.985778  
C -2.273646 2.176886 1.940338  
C -0.285535 4.133566 1.911110  
H 0.561770 3.026123 0.258133  
C -2.304998 3.219937 2.866815  
H -3.052182 1.410411 1.978080  
C -1.317023 4.205070 2.848442  
H 0.501355 4.889925 1.903244  
H -3.105268 3.260331 3.607848  
H -1.344113 5.020730 3.573182  
C 0.758149 -0.477237 1.209459  
H 0.841829 0.606032 1.268129  
C 1.921971 -1.253883 1.232861  
C 3.011970 -0.744237 2.137495  
F 2.606210 -0.814523 3.416405  
F 4.144810 -1.448826 2.080704  
F 3.321184 0.536488 1.910800  
O -0.735358 -2.310018 1.111750  
C -0.478971 -1.121825 0.944373  
H -3.928643 2.002165 -0.228777  
C -6.252546 -0.221110 -0.637562  
H -6.324397 0.765001 -1.095834  
H -8.346307 -0.653046 -0.819977  
H 1.814008 -2.341172 1.309528  
C 0.457806 -3.959016 -1.503133  
H 0.124761 -3.750441 -2.529322

H 0.713036 -5.019340 -1.402732  
 H -0.339974 -3.686557 -0.797908  
 C 1.535351 -1.909690 -1.232581  
 O 1.645675 -3.236696 -1.200606  
 O 0.500183 -1.345983 -1.528380  
 C 4.061627 -1.854700 -0.573325  
 O 4.339351 -3.029212 -0.438450  
 C 2.719994 -1.223025 -0.715551  
 N 2.929348 0.174368 -0.983147  
 C 4.282225 0.473837 -0.741225  
 C 4.941095 1.708989 -0.726094  
 C 5.000381 -0.710984 -0.535298  
 C 6.317773 1.703150 -0.504623  
 H 4.399698 2.641267 -0.867336  
 C 6.373373 -0.704787 -0.302196  
 C 7.038129 0.517563 -0.289532  
 H 6.846977 2.658111 -0.486997  
 H 6.899164 -1.647233 -0.135130  
 H 8.112661 0.561278 -0.106933  
 C 2.135217 1.120213 -1.663627  
 O 2.153436 2.276261 -1.293965  
 C 1.432833 0.742657 -2.943150  
 H 1.770812 -0.214240 -3.351632  
 H 0.347498 0.698916 -2.788507  
 H 1.650903 1.555242 -3.650277

-----

SMDopt/19\_TS\_SSa

Frequencies, energies and thermodynamic properties:

Lowest Vibrational Mode (1/cm) = -224.9064  
 2nd Lowest Vibrational Mode (1/cm) = 17.3366  
 E(RM062X) (a.u.) = -2588.55219527  
 Thermal correction to Enthalpy (a.u.) = 0.663129  
 Thermal correction to Gibbs Free Energy (a.u.) = 0.548628  
 Total Entropy (cal/Kmol) = 240.987  
 Esp(RM062X+D3) (a.u.) = -2591.15504502  
 Esp(D3) (a.u.) = -0.0100576193  
 Esp(RM062X) (a.u.) = -2591.1449874007

Optimised cartesian coordinates (Angstrom):

C -7.426852 -1.469358 -0.518132  
C -7.237811 -2.712549 0.102105  
C -5.983126 -3.095585 0.566862  
C -4.924213 -2.204784 0.396049  
C -5.114098 -0.970837 -0.228970  
H -8.084146 -3.389334 0.225411  
H -5.831362 -4.060830 1.052021  
C -2.871924 -0.831773 0.265558  
C -1.436598 1.094646 -0.244709  
C -2.410594 1.291596 -1.419495  
C -3.841560 1.067854 -0.964339  
H -4.521616 1.041834 -1.825567  
S -3.247767 -2.428826 0.866423  
N -3.926492 -0.235703 -0.300501  
N -1.675542 -0.237669 0.366830  
C -2.220624 2.631861 -2.166494  
C -3.056034 3.790875 -1.615662  
C -2.518686 2.442278 -3.654072  
H -1.155209 2.897897 -2.069498  
H -4.126466 3.638431 -1.826707  
H -2.938508 3.931366 -0.531812  
H -2.757339 4.727039 -2.109932  
H -1.849340 1.695267 -4.105207  
H -3.557155 2.106032 -3.804934  
H -2.391747 3.389188 -4.199217  
H -2.173638 0.486472 -2.133240  
H -0.422611 1.037444 -0.667886  
C -1.475656 2.207251 0.781542  
C -0.524922 3.230729 0.684228  
C -2.450730 2.270583 1.781687  
C -0.576477 4.324960 1.546177  
H 0.267011 3.149240 -0.065358  
C -2.500167 3.365439 2.646315  
H -3.178562 1.463336 1.899809  
C -1.571293 4.399295 2.523046  
H 0.167215 5.119302 1.460379

|   |           |           |           |
|---|-----------|-----------|-----------|
| H | -3.267353 | 3.408294  | 3.421466  |
| H | -1.612618 | 5.255160  | 3.199105  |
| C | 0.583985  | -0.158827 | 1.296420  |
| H | 0.556999  | 0.925673  | 1.275886  |
| C | 1.792085  | -0.806523 | 1.429904  |
| C | 2.869201  | -0.091587 | 2.194397  |
| F | 2.616511  | -0.155400 | 3.510996  |
| F | 4.090496  | -0.610716 | 2.028130  |
| F | 2.947233  | 1.206080  | 1.883611  |
| O | -0.705241 | -2.141774 | 1.173220  |
| C | -0.570959 | -0.943884 | 0.976149  |
| H | -4.190477 | 1.842343  | -0.265462 |
| C | -6.371210 | -0.580015 | -0.693048 |
| H | -6.524067 | 0.388559  | -1.168689 |
| H | -8.420553 | -1.188396 | -0.869359 |
| H | 1.802369  | -1.887494 | 1.578884  |
| C | -0.384345 | -2.150300 | -2.012441 |
| H | -0.611024 | -2.980798 | -1.327839 |
| H | -1.282364 | -1.543781 | -2.176342 |
| H | -0.030695 | -2.554834 | -2.969762 |
| C | 1.809830  | -1.818830 | -1.281089 |
| O | 0.587554  | -1.288983 | -1.434541 |
| O | 2.091069  | -2.921277 | -1.702380 |
| C | 2.690731  | 0.521504  | -0.877751 |
| O | 1.707007  | 1.240302  | -1.009196 |
| C | 2.732809  | -0.918451 | -0.572106 |
| N | 4.116874  | -1.318472 | -0.597582 |
| C | 4.918182  | -0.195000 | -0.854027 |
| C | 6.313114  | -0.064774 | -0.928354 |
| C | 4.100983  | 0.936669  | -0.995862 |
| C | 6.832320  | 1.209401  | -1.154675 |
| H | 6.964900  | -0.926528 | -0.826787 |
| C | 4.631516  | 2.205295  | -1.223604 |
| C | 6.013485  | 2.339912  | -1.303668 |
| H | 7.916008  | 1.324942  | -1.223933 |
| H | 3.963297  | 3.062110  | -1.331458 |
| H | 6.464644  | 3.317050  | -1.482162 |

C 4.647748 -2.528817 -0.161116  
O 5.812264 -2.798172 -0.374092  
C 3.787891 -3.442540 0.675835  
H 3.875900 -3.109399 1.721694  
H 2.734624 -3.464184 0.390940  
H 4.208891 -4.452025 0.602867

-----  
SMDopt/19\_TS\_SSb

Frequencies, energies and thermodynamic properties:

Lowest Vibrational Mode (1/cm) = -252.2233  
2nd Lowest Vibrational Mode (1/cm) = 17.0092  
E(RM062X) (a.u.) = -2588.55209251  
Thermal correction to Enthalpy (a.u.) = 0.663039  
Thermal correction to Gibbs Free Energy (a.u.) = 0.547845  
Total Entropy (cal/Kmol) = 242.445  
Esp(RM062X+D3) (a.u.) = -2591.15400451  
Esp(D3) (a.u.) = -0.0099446274  
Esp(RM062X) (a.u.) = -2591.1440598826

Optimised cartesian coordinates (Angstrom):

C 7.391120 -1.549777 0.571753  
C 7.229286 -2.720617 -0.182001  
C 5.997039 -3.044173 -0.743102  
C 4.933410 -2.167835 -0.533010  
C 5.095603 -1.006875 0.225890  
H 8.078979 -3.387162 -0.334634  
H 5.866585 -3.953335 -1.331859  
C 2.880124 -0.799268 -0.359170  
C 1.445924 1.091632 0.247412  
C 2.329225 1.134022 1.504704  
C 3.787956 0.939081 1.131225  
H 4.404184 0.793944 2.028254  
S 3.279044 -2.331834 -1.099820  
N 3.908033 -0.274856 0.318904  
N 1.701066 -0.181391 -0.470016  
C 2.093363 2.381730 2.385091  
C 2.980220 3.580382 2.037617  
C 2.267474 2.017187 3.859683

|   |           |           |           |
|---|-----------|-----------|-----------|
| H | 1.041510  | 2.676094  | 2.234119  |
| H | 4.029795  | 3.384776  | 2.309272  |
| H | 2.947640  | 3.844307  | 0.970804  |
| H | 2.653890  | 4.460284  | 2.611402  |
| H | 1.556184  | 1.235822  | 4.165007  |
| H | 3.286579  | 1.645047  | 4.052763  |
| H | 2.105616  | 2.896766  | 4.500188  |
| H | 2.021319  | 0.253105  | 2.091202  |
| H | 0.406138  | 1.020938  | 0.595904  |
| C | 1.584594  | 2.294115  | -0.661369 |
| C | 0.643897  | 3.325015  | -0.543320 |
| C | 2.638844  | 2.431378  | -1.570545 |
| C | 0.781127  | 4.494273  | -1.290428 |
| H | -0.206253 | 3.190370  | 0.130912  |
| C | 2.773296  | 3.600485  | -2.321026 |
| H | 3.364666  | 1.625211  | -1.705928 |
| C | 1.851660  | 4.638029  | -2.174743 |
| H | 0.044563  | 5.293378  | -1.188230 |
| H | 3.601344  | 3.698982  | -3.025261 |
| H | 1.959733  | 5.552314  | -2.761014 |
| C | -0.546933 | -0.030262 | -1.411706 |
| H | -0.508133 | 1.053286  | -1.342245 |
| C | -1.766025 | -0.666953 | -1.526786 |
| C | -2.858161 | 0.033313  | -2.281981 |
| F | -2.621966 | -0.038473 | -3.601023 |
| F | -4.069854 | -0.503572 | -2.094428 |
| F | -2.950969 | 1.331869  | -1.981317 |
| O | 0.736379  | -2.022556 | -1.421034 |
| C | 0.600478  | -0.843366 | -1.135056 |
| H | 4.194577  | 1.787082  | 0.560390  |
| C | 6.329643  | -0.675907 | 0.787509  |
| H | 6.460721  | 0.237582  | 1.367236  |
| H | 8.367282  | -1.313901 | 0.997523  |
| H | -1.768506 | -1.743935 | -1.701794 |
| C | -0.956675 | -3.405193 | 2.365146  |
| H | -0.559087 | -2.854611 | 3.228691  |
| H | -1.427993 | -4.335523 | 2.699010  |

|   |           |           |           |
|---|-----------|-----------|-----------|
| H | -0.132271 | -3.626145 | 1.672449  |
| C | -1.583734 | -1.483621 | 1.181691  |
| O | -1.971956 | -2.655150 | 1.711125  |
| O | -0.456800 | -1.055885 | 1.315814  |
| C | -2.711953 | 0.671072  | 0.741440  |
| O | -1.777236 | 1.452672  | 0.854803  |
| C | -2.643505 | -0.774516 | 0.451940  |
| N | -3.990594 | -1.284668 | 0.516346  |
| C | -4.872509 | -0.223176 | 0.780628  |
| C | -6.270884 | -0.204949 | 0.891227  |
| C | -4.146582 | 0.972925  | 0.891846  |
| C | -6.885474 | 1.025292  | 1.121945  |
| H | -6.853462 | -1.117051 | 0.812459  |
| C | -4.772155 | 2.196874  | 1.123635  |
| C | -6.157788 | 2.219885  | 1.239772  |
| H | -7.972787 | 1.053161  | 1.219164  |
| H | -4.172933 | 3.105854  | 1.206565  |
| H | -6.681867 | 3.159015  | 1.422798  |
| C | -4.432467 | -2.535851 | 0.101687  |
| O | -5.576871 | -2.883818 | 0.308185  |
| C | -3.501619 | -3.413880 | -0.697899 |
| H | -2.439862 | -3.295056 | -0.475788 |
| H | -3.798288 | -4.455282 | -0.526239 |
| H | -3.674024 | -3.182904 | -1.761081 |

-----

SMDopt/19\_TS\_SSc

Frequencies, energies and thermodynamic properties:

|                                                  |                  |
|--------------------------------------------------|------------------|
| Lowest Vibrational Mode (1/cm) =                 | -255.8761        |
| 2nd Lowest Vibrational Mode (1/cm) =             | 16.3879          |
| E(RM062X) (a.u.) =                               | -2588.55029538   |
| Thermal correction to Enthalpy (a.u.) =          | 0.662833         |
| Thermal correction to Gibbs Free Energy (a.u.) = | 0.547363         |
| Total Entropy (cal/Kmol) =                       | 243.028          |
| Esp(RM062X+D3) (a.u.) =                          | -2591.15262983   |
| Esp(D3) (a.u.) =                                 | -0.0098413757    |
| Esp(RM062X) (a.u.) =                             | -2591.1427884543 |

Optimised cartesian coordinates (Angstrom):

|   |           |           |           |
|---|-----------|-----------|-----------|
| C | 7.406720  | -1.516698 | 0.567549  |
| C | 7.257142  | -2.685446 | -0.191857 |
| C | 6.028842  | -3.017596 | -0.756778 |
| C | 4.956855  | -2.151988 | -0.545062 |
| C | 5.106942  | -0.992972 | 0.219330  |
| H | 8.113207  | -3.343467 | -0.345909 |
| H | 5.907586  | -3.925353 | -1.349676 |
| C | 2.890313  | -0.803136 | -0.368956 |
| C | 1.441033  | 1.073292  | 0.239247  |
| C | 2.318015  | 1.117472  | 1.500754  |
| C | 3.779925  | 0.935136  | 1.133589  |
| H | 4.392746  | 0.787822  | 2.032642  |
| S | 3.304764  | -2.329361 | -1.114981 |
| N | 3.912647  | -0.272283 | 0.313510  |
| N | 1.706499  | -0.196206 | -0.479773 |
| C | 2.067139  | 2.359459  | 2.384950  |
| C | 2.945816  | 3.566937  | 2.047489  |
| C | 2.235959  | 1.990338  | 3.859041  |
| H | 1.013530  | 2.645169  | 2.229031  |
| H | 3.995413  | 3.379106  | 2.324559  |
| H | 2.917268  | 3.834743  | 0.981528  |
| H | 2.608779  | 4.441861  | 2.622733  |
| H | 1.529809  | 1.201434  | 4.156889  |
| H | 3.257172  | 1.626293  | 4.056489  |
| H | 2.062676  | 2.865675  | 4.502405  |
| H | 2.013170  | 0.231852  | 2.081718  |
| H | 0.400349  | 0.996708  | 0.583656  |
| C | 1.577746  | 2.278806  | -0.665841 |
| C | 0.629642  | 3.303378  | -0.551012 |
| C | 2.637005  | 2.425499  | -1.567772 |
| C | 0.764658  | 4.475763  | -1.293722 |
| H | -0.223992 | 3.160092  | 0.117087  |
| C | 2.769054  | 3.597627  | -2.313991 |
| H | 3.368806  | 1.624291  | -1.700570 |
| C | 1.840056  | 4.629013  | -2.170546 |
| H | 0.022545  | 5.270074  | -1.193997 |
| H | 3.601029  | 3.703413  | -3.012528 |



|   |           |           |           |
|---|-----------|-----------|-----------|
| H | 1.946334  | 5.545810  | -2.753235 |
| C | -0.546124 | -0.067788 | -1.412495 |
| H | -0.502585 | 1.017487  | -1.365152 |
| C | -1.772385 | -0.695655 | -1.495761 |
| C | -2.855033 | 0.017065  | -2.253295 |
| F | -2.629155 | -0.079531 | -3.573811 |
| F | -4.080641 | -0.481776 | -2.054549 |
| F | -2.913753 | 1.323752  | -1.974078 |
| O | 0.761695  | -2.045888 | -1.434190 |
| C | 0.609515  | -0.870998 | -1.142606 |
| H | 4.183685  | 1.789970  | 0.570938  |
| C | 6.336764  | -0.653551 | 0.785106  |
| H | 6.458536  | 0.258425  | 1.369223  |
| H | 8.379803  | -1.273859 | 0.996454  |
| H | -1.822819 | -1.780515 | -1.608177 |
| C | -0.936254 | -3.425485 | 2.345356  |
| H | -0.487374 | -2.892638 | 3.195358  |
| H | -1.414657 | -4.347115 | 2.693572  |
| H | -0.145935 | -3.663336 | 1.619149  |
| C | -1.561495 | -1.494203 | 1.190806  |
| O | -1.957009 | -2.649116 | 1.738045  |
| O | -0.423351 | -1.084157 | 1.296667  |
| C | -2.695742 | 0.676683  | 0.776017  |
| O | -1.765601 | 1.466455  | 0.898289  |
| C | -2.624941 | -0.758887 | 0.495027  |
| N | -3.965588 | -1.283043 | 0.530727  |
| C | -4.862659 | -0.222890 | 0.759833  |
| C | -6.263023 | -0.181870 | 0.845386  |
| C | -4.135383 | 0.974269  | 0.894669  |
| C | -6.873103 | 1.051088  | 1.076549  |
| H | -6.889781 | -1.062870 | 0.754562  |
| C | -4.754930 | 2.201162  | 1.122685  |
| C | -6.141572 | 2.239004  | 1.215286  |
| H | -7.961678 | 1.081578  | 1.154141  |
| H | -4.146015 | 3.101967  | 1.223009  |
| H | -6.661340 | 3.181070  | 1.394706  |
| C | -4.239856 | -2.530542 | -0.030578 |

O -3.366295 -3.158334 -0.587793  
C -5.638114 -3.071452 0.095140  
H -6.035863 -2.946557 1.109711  
H -6.305465 -2.562312 -0.615339  
H -5.600797 -4.135013 -0.163948

-----  
SMDopt/19\_TS\_SSd

Frequencies, energies and thermodynamic properties:

Lowest Vibrational Mode (1/cm) = -163.8651  
2nd Lowest Vibrational Mode (1/cm) = 14.0204  
E(RM062X) (a.u.) = -2588.54674981  
Thermal correction to Enthalpy (a.u.) = 0.662994  
Thermal correction to Gibbs Free Energy (a.u.) = 0.547876  
Total Entropy (cal/Kmol) = 242.285  
Esp(RM062X+D3) (a.u.) = -2591.15389090  
Esp(D3) (a.u.) = -0.0109946719  
Esp(RM062X) (a.u.) = -2591.1428962281

Optimised cartesian coordinates (Angstrom):

C 6.911288 -1.638754 -0.573508  
C 6.566151 -2.777732 -1.315888  
C 5.240888 -3.038734 -1.648015  
C 4.271061 -2.133620 -1.217227  
C 4.616096 -1.005766 -0.470593  
H 7.346093 -3.466995 -1.641569  
H 4.966619 -3.920552 -2.228912  
C 2.341828 -0.705113 -0.632184  
C 1.095747 1.175994 0.348511  
C 2.237680 1.154110 1.378042  
C 3.570391 0.973636 0.677015  
H 4.373367 0.824409 1.409533  
S 2.540650 -2.211768 -1.490480  
N 3.494016 -0.237356 -0.144908  
N 1.173166 -0.052675 -0.482528  
C 2.217656 2.347724 2.357559  
C 3.015285 3.565991 1.884876  
C 2.723407 1.894926 3.727705  
H 1.161319 2.642113 2.472357

|   |           |           |           |
|---|-----------|-----------|-----------|
| H | 4.096786  | 3.356954  | 1.905064  |
| H | 2.749573  | 3.887492  | 0.867823  |
| H | 2.834435  | 4.412733  | 2.563235  |
| H | 2.093556  | 1.093525  | 4.142105  |
| H | 3.755963  | 1.516171  | 3.658506  |
| H | 2.721750  | 2.733649  | 4.439312  |
| H | 2.069421  | 0.242298  | 1.972386  |
| H | 0.166068  | 1.085633  | 0.925721  |
| C | 1.017985  | 2.441385  | -0.479073 |
| C | 0.170582  | 3.464721  | -0.034553 |
| C | 1.781850  | 2.636131  | -1.632994 |
| C | 0.113617  | 4.678896  | -0.715885 |
| H | -0.448656 | 3.296590  | 0.852063  |
| C | 1.723249  | 3.852964  | -2.315431 |
| H | 2.424408  | 1.839148  | -2.016290 |
| C | 0.896619  | 4.877739  | -1.854977 |
| H | -0.548370 | 5.470396  | -0.360162 |
| H | 2.324673  | 3.997217  | -3.214609 |
| H | 0.852197  | 5.827186  | -2.391291 |
| C | -1.177754 | 0.262957  | -1.154695 |
| H | -1.102064 | 1.329671  | -0.960873 |
| C | -2.381285 | -0.294238 | -1.501231 |
| C | -3.420254 | 0.590523  | -2.140540 |
| F | -3.424055 | 0.357919  | -3.462383 |
| F | -4.674573 | 0.394308  | -1.726474 |
| F | -3.164382 | 1.893980  | -1.985389 |
| O | 0.036480  | -1.725921 | -1.535326 |
| C | -0.016619 | -0.597120 | -1.083923 |
| H | 3.833415  | 1.824554  | 0.030947  |
| C | 5.945894  | -0.736133 | -0.140211 |
| H | 6.224025  | 0.151896  | 0.426844  |
| H | 7.958209  | -1.451285 | -0.331659 |
| H | -2.437286 | -1.327361 | -1.851422 |
| C | -6.835515 | -1.501617 | -0.105790 |
| H | -7.119993 | -0.480916 | -0.401015 |
| H | -7.239691 | -2.221797 | -0.825746 |
| H | -7.245445 | -1.704549 | 0.893661  |

|   |           |           |           |
|---|-----------|-----------|-----------|
| C | -4.740184 | -0.851242 | 0.688142  |
| O | -5.428955 | -1.659199 | -0.128549 |
| O | -5.290334 | -0.088276 | 1.456982  |
| C | -2.734604 | -2.364972 | 0.332037  |
| O | -3.144864 | -3.274614 | -0.371885 |
| C | -3.294971 | -1.022348 | 0.543636  |
| N | -2.438275 | -0.328702 | 1.462756  |
| C | -1.366199 | -1.174722 | 1.819430  |
| C | -0.265932 | -0.958176 | 2.664920  |
| C | -1.505208 | -2.399290 | 1.156102  |
| C | 0.661469  | -1.992516 | 2.796960  |
| H | -0.140924 | -0.023871 | 3.203597  |
| C | -0.572559 | -3.423674 | 1.292411  |
| C | 0.524551  | -3.215725 | 2.121896  |
| H | 1.519199  | -1.840786 | 3.456487  |
| H | -0.714023 | -4.357696 | 0.744961  |
| H | 1.276058  | -3.995746 | 2.253484  |
| C | -2.398637 | 1.035118  | 1.701110  |
| O | -1.571328 | 1.511047  | 2.465125  |
| C | -3.371930 | 1.950185  | 1.007357  |
| H | -3.992410 | 1.484519  | 0.245058  |
| H | -4.036273 | 2.371162  | 1.774696  |
| H | -2.785482 | 2.774445  | 0.577648  |

-----  
SMDopt/19\_TS\_SSe

Frequencies, energies and thermodynamic properties:

|                                                  |                  |
|--------------------------------------------------|------------------|
| Lowest Vibrational Mode (1/cm) =                 | -217.3198        |
| 2nd Lowest Vibrational Mode (1/cm) =             | 19.3824          |
| E(RM062X) (a.u.) =                               | -2588.54907014   |
| Thermal correction to Enthalpy (a.u.) =          | 0.662951         |
| Thermal correction to Gibbs Free Energy (a.u.) = | 0.549097         |
| Total Entropy (cal/Kmol) =                       | 239.627          |
| Esp(RM062X+D3) (a.u.) =                          | -2591.15266236   |
| Esp(D3) (a.u.) =                                 | -0.0099641682    |
| Esp(RM062X) (a.u.) =                             | -2591.1426981918 |

Optimised cartesian coordinates (Angstrom):

|   |           |           |           |
|---|-----------|-----------|-----------|
| C | -7.444292 | -1.423908 | -0.496126 |
|---|-----------|-----------|-----------|

C -7.270011 -2.662955 0.136586  
C -6.020066 -3.055726 0.606148  
C -4.950856 -2.178985 0.427272  
C -5.125922 -0.949576 -0.210945  
H -8.124209 -3.328626 0.266032  
H -5.879504 -4.017788 1.100904  
C -2.882621 -0.831432 0.283659  
C -1.426082 1.072915 -0.244201  
C -2.393536 1.266348 -1.424760  
C -3.828726 1.063593 -0.972796  
H -4.505764 1.031959 -1.836375  
S -3.277304 -2.417756 0.900877  
N -3.929690 -0.229484 -0.290620  
N -1.679801 -0.250747 0.379799  
C -2.184574 2.595572 -2.186297  
C -3.010821 3.769864 -1.654498  
C -2.474527 2.391906 -3.673582  
H -1.116956 2.850963 -2.084963  
H -4.081549 3.626083 -1.870034  
H -2.898025 3.921999 -0.571700  
H -2.699407 4.696930 -2.157997  
H -1.810288 1.632407 -4.111236  
H -3.515523 2.065184 -3.827882  
H -2.333454 3.330891 -4.228902  
H -2.162420 0.450428 -2.128139  
H -0.410862 1.003166 -0.663316  
C -1.459569 2.196305 0.770557  
C -0.495558 3.207126 0.669614  
C -2.440158 2.281137 1.763801  
C -0.539392 4.310001 1.521062  
H 0.300726 3.106307 -0.073131  
C -2.481541 3.384527 2.617963  
H -3.178703 1.484160 1.885078  
C -1.539303 4.405769 2.490902  
H 0.214609 5.094345 1.432929  
H -3.252917 3.443985 3.387857  
H -1.574254 5.268325 3.158789

|   |           |           |           |
|---|-----------|-----------|-----------|
| C | 0.581371  | -0.187305 | 1.304047  |
| H | 0.546881  | 0.897795  | 1.304848  |
| C | 1.795572  | -0.823564 | 1.410595  |
| C | 2.869884  | -0.094394 | 2.165899  |
| F | 2.636949  | -0.181383 | 3.486570  |
| F | 4.101654  | -0.576538 | 1.979449  |
| F | 2.911008  | 1.210964  | 1.874889  |
| O | -0.730118 | -2.159102 | 1.200905  |
| C | -0.581387 | -0.966365 | 0.991674  |
| H | -4.172777 | 1.851497  | -0.286634 |
| C | -6.378176 | -0.548814 | -0.679515 |
| H | -6.519294 | 0.416591  | -1.165027 |
| H | -8.434497 | -1.134892 | -0.850692 |
| H | 1.860560  | -1.909300 | 1.499009  |
| C | -0.424671 | -2.187185 | -1.983769 |
| H | -0.627380 | -3.029939 | -1.306557 |
| H | -1.336384 | -1.595987 | -2.128225 |
| H | -0.080978 | -2.576617 | -2.951225 |
| C | 1.780688  | -1.830056 | -1.298576 |
| O | 0.541259  | -1.316694 | -1.413904 |
| O | 2.066157  | -2.918916 | -1.740427 |
| C | 2.674246  | 0.522857  | -0.913556 |
| O | 1.697414  | 1.255828  | -1.052597 |
| C | 2.707747  | -0.907222 | -0.625342 |
| N | 4.081870  | -1.329024 | -0.621506 |
| C | 4.904208  | -0.208868 | -0.829796 |
| C | 6.299845  | -0.062165 | -0.861068 |
| C | 4.091838  | 0.928221  | -0.993502 |
| C | 6.822488  | 1.213020  | -1.076262 |
| H | 6.986638  | -0.893582 | -0.737573 |
| C | 4.624807  | 2.197986  | -1.204717 |
| C | 6.007271  | 2.340864  | -1.248640 |
| H | 7.907658  | 1.327456  | -1.112569 |
| H | 3.953969  | 3.050595  | -1.329097 |
| H | 6.459956  | 3.319579  | -1.413472 |
| C | 4.436608  | -2.544459 | -0.030705 |
| O | 3.621912  | -3.190563 | 0.588623  |

C 5.853378 -3.022232 -0.205768  
H 6.233858 -2.829783 -1.216007  
H 6.508730 -2.525780 0.525064  
H 5.863295 -4.098094 0.001407

-----  
SMDopt/19\_TS\_SSf

Frequencies, energies and thermodynamic properties:

Lowest Vibrational Mode (1/cm) = -148.9702  
2nd Lowest Vibrational Mode (1/cm) = 15.0124  
E(RM062X) (a.u.) = -2588.54113254  
Thermal correction to Enthalpy (a.u.) = 0.662684  
Thermal correction to Gibbs Free Energy (a.u.) = 0.547182  
Total Entropy (cal/Kmol) = 243.094  
Esp(RM062X+D3) (a.u.) = -2591.15126718  
Esp(D3) (a.u.) = -0.0110177697  
Esp(RM062X) (a.u.) = -2591.1402494103

Optimised cartesian coordinates (Angstrom):

C 6.649464 -2.053796 -0.439166  
C 6.222395 -3.137530 -1.221185  
C 4.893005 -3.255603 -1.611504  
C 4.001256 -2.265849 -1.196623  
C 4.426436 -1.194966 -0.408633  
H 6.941690 -3.896160 -1.531908  
H 4.555810 -4.092784 -2.224329  
C 2.199636 -0.673033 -0.639912  
C 1.111062 1.311968 0.328036  
C 2.234420 1.218583 1.373082  
C 3.554096 0.879257 0.709044  
H 4.314385 0.656106 1.467685  
S 2.290781 -2.151676 -1.558705  
N 3.373591 -0.325212 -0.106381  
N 1.084552 0.069884 -0.484392  
C 2.322682 2.450947 2.300854  
C 3.249188 3.559804 1.795198  
C 2.752152 2.008583 3.699936  
H 1.302751 2.862990 2.377677  
H 4.302860 3.241715 1.840185

|   |           |           |           |
|---|-----------|-----------|-----------|
| H | 3.028947  | 3.866689  | 0.762704  |
| H | 3.148876  | 4.446403  | 2.438282  |
| H | 2.034432  | 1.295182  | 4.132396  |
| H | 3.740070  | 1.521398  | 3.669641  |
| H | 2.825532  | 2.872646  | 4.376477  |
| H | 1.968806  | 0.355272  | 2.000629  |
| H | 0.168775  | 1.316661  | 0.893415  |
| C | 1.165168  | 2.546976  | -0.548265 |
| C | 0.401168  | 3.663940  | -0.190804 |
| C | 1.996253  | 2.618982  | -1.671007 |
| C | 0.493868  | 4.847282  | -0.921314 |
| H | -0.274582 | 3.601534  | 0.666615  |
| C | 2.087967  | 3.803470  | -2.403310 |
| H | 2.579510  | 1.751548  | -1.990718 |
| C | 1.344610  | 4.921705  | -2.025404 |
| H | -0.105415 | 5.712000  | -0.631326 |
| H | 2.742205  | 3.849241  | -3.275562 |
| H | 1.417644  | 5.847018  | -2.599388 |
| C | -1.275331 | 0.546555  | -1.035836 |
| H | -1.193499 | 1.558338  | -0.651188 |
| C | -2.487191 | 0.070338  | -1.426881 |
| C | -3.585473 | 1.054322  | -1.738656 |
| F | -3.735138 | 1.082566  | -3.080954 |
| F | -4.784390 | 0.762029  | -1.247512 |
| F | -3.294056 | 2.302737  | -1.373988 |
| O | -0.113946 | -1.365630 | -1.784142 |
| C | -0.120719 | -0.329493 | -1.150205 |
| H | 3.927857  | 1.685544  | 0.060131  |
| C | 5.762674  | -1.067289 | -0.022089 |
| H | 6.105802  | -0.224273 | 0.576715  |
| H | 7.699020  | -1.978102 | -0.152156 |
| H | -2.593851 | -0.893683 | -1.928809 |
| C | -6.715463 | -1.666280 | -0.440264 |
| H | -7.050840 | -0.619489 | -0.487919 |
| H | -7.045098 | -2.200530 | -1.338910 |
| H | -7.160452 | -2.132420 | 0.450995  |
| C | -4.706766 | -1.131192 | 0.620681  |



O -5.305669 -1.746257 -0.417983  
 O -5.343008 -0.605021 1.508811  
 C -2.564155 -2.422006 0.085248  
 O -2.891929 -3.262950 -0.747898  
 C -3.256985 -1.231505 0.540605  
 N -2.473081 -0.589950 1.544622  
 C -1.284248 -1.318653 1.727767  
 C -0.169913 -1.108302 2.556910  
 C -1.305214 -2.432997 0.871527  
 C 0.878911 -2.026216 2.494848  
 H -0.091860 -0.271151 3.244308  
 C -0.249388 -3.338516 0.814281  
 C 0.854927 -3.135104 1.635440  
 H 1.743574 -1.869162 3.144087  
 H -0.303910 -4.178452 0.118309  
 H 1.700316 -3.825079 1.613215  
 C -2.676609 0.755540 1.859599  
 O -3.436839 1.435758 1.208164  
 C -1.962895 1.312882 3.067953  
 H -1.935816 0.596516 3.898061  
 H -0.931087 1.601831 2.817177  
 H -2.502934 2.216393 3.372583

-----

SMDopt/19\_TS\_SSg

Frequencies, energies and thermodynamic properties:

Lowest Vibrational Mode (1/cm) = -175.5015  
 2nd Lowest Vibrational Mode (1/cm) = 11.3614  
 E(RM062X) (a.u.) = -2588.54434267  
 Thermal correction to Enthalpy (a.u.) = 0.663048  
 Thermal correction to Gibbs Free Energy (a.u.) = 0.547428  
 Total Entropy (cal/Kmol) = 243.343  
 Esp(RM062X+D3) (a.u.) = -2591.15138659  
 Esp(D3) (a.u.) = -0.0109723965  
 Esp(RM062X) (a.u.) = -2591.1404141935

Optimised cartesian coordinates (Angstrom):

C 6.934704 -1.502007 -0.277556  
 C 6.644733 -2.646112 -1.035579

|   |           |           |           |
|---|-----------|-----------|-----------|
| C | 5.343829  | -2.920638 | -1.444094 |
| C | 4.340819  | -2.025038 | -1.072534 |
| C | 4.630887  | -0.891774 | -0.310792 |
| H | 7.449083  | -3.328547 | -1.312671 |
| H | 5.113462  | -3.806558 | -2.037748 |
| C | 2.364802  | -0.618203 | -0.600171 |
| C | 1.031338  | 1.222910  | 0.346171  |
| C | 2.137769  | 1.229177  | 1.413921  |
| C | 3.498446  | 1.083470  | 0.760685  |
| H | 4.279196  | 0.963545  | 1.521694  |
| S | 2.630836  | -2.119155 | -1.450386 |
| N | 3.483883  | -0.134694 | -0.053064 |
| N | 1.178686  | 0.011974  | -0.501985 |
| C | 2.055487  | 2.420072  | 2.393415  |
| C | 2.835836  | 3.659253  | 1.947313  |
| C | 2.528896  | 1.977203  | 3.778318  |
| H | 0.989424  | 2.688498  | 2.475238  |
| H | 3.921165  | 3.476244  | 1.994494  |
| H | 2.588518  | 3.979440  | 0.925224  |
| H | 2.617153  | 4.498002  | 2.624487  |
| H | 1.906873  | 1.158959  | 4.171103  |
| H | 3.572192  | 1.624370  | 3.741003  |
| H | 2.483845  | 2.813830  | 4.490941  |
| H | 1.974130  | 0.312501  | 2.001518  |
| H | 0.086814  | 1.090301  | 0.891406  |
| C | 0.934128  | 2.496518  | -0.467338 |
| C | 0.030146  | 3.479488  | -0.044120 |
| C | 1.734303  | 2.738872  | -1.587233 |
| C | -0.046438 | 4.701674  | -0.708909 |
| H | -0.618618 | 3.274145  | 0.812869  |
| C | 1.655804  | 3.963138  | -2.254045 |
| H | 2.422349  | 1.973175  | -1.954549 |
| C | 0.773307  | 4.948683  | -1.812124 |
| H | -0.752468 | 5.461323  | -0.368925 |
| H | 2.286348  | 4.144415  | -3.126190 |
| H | 0.713809  | 5.904394  | -2.335699 |
| C | -1.165559 | 0.262423  | -1.221712 |

H -1.153543 1.313325 -0.947590  
C -2.335330 -0.328244 -1.635315  
C -3.390048 0.556746 -2.246486  
F -3.310230 0.457184 -3.583587  
F -4.646752 0.250504 -1.925086  
F -3.221033 1.851838 -1.954275  
O 0.151529 -1.636461 -1.698027  
C 0.032459 -0.541756 -1.177393  
H 3.758212 1.937531 0.117424  
C 5.936768 -0.608115 0.095610  
H 6.172958 0.284089 0.675119  
H 7.963730 -1.303687 0.024853  
H -2.325352 -1.327554 -2.075948  
C -6.592292 -0.502145 1.600946  
H -7.030272 -1.499608 1.745959  
H -6.793696 0.122983 2.478014  
H -7.040621 -0.047391 0.705861  
C -4.721845 -1.263159 0.407255  
O -5.181884 -0.578126 1.476518  
O -5.461384 -1.868047 -0.331149  
C -2.613470 -2.523912 0.019055  
O -2.976470 -3.408276 -0.739341  
C -3.258510 -1.231598 0.300098  
N -2.467910 -0.554568 1.288689  
C -1.344464 -1.349167 1.600248  
C -0.268414 -1.114959 2.471935  
C -1.394713 -2.535061 0.857661  
C 0.728817 -2.087852 2.544551  
H -0.213158 -0.212094 3.072170  
C -0.393834 -3.499498 0.937697  
C 0.682169 -3.269943 1.788277  
H 1.569950 -1.920551 3.221637  
H -0.464548 -4.402190 0.327598  
H 1.487081 -4.001606 1.874408  
C -2.526838 0.789229 1.618948  
O -1.733939 1.274872 2.411194  
C -3.583665 1.667068 0.999485

H -4.153905 1.216090 0.188160  
H -4.285734 1.953251 1.795465  
H -3.081228 2.578994 0.649227

-----

SMDopt/19\_TS\_SSh

Frequencies, energies and thermodynamic properties:

Lowest Vibrational Mode (1/cm) = -157.5916  
2nd Lowest Vibrational Mode (1/cm) = 14.7130  
E(RM062X) (a.u.) = -2588.53937821  
Thermal correction to Enthalpy (a.u.) = 0.662593  
Thermal correction to Gibbs Free Energy (a.u.) = 0.546242  
Total Entropy (cal/Kmol) = 244.882  
Esp(RM062X+D3) (a.u.) = -2591.14930184  
Esp(D3) (a.u.) = -0.0110490437  
Esp(RM062X) (a.u.) = -2591.1382527963

Optimised cartesian coordinates (Angstrom):

C 6.727357 -1.847598 -0.224355  
C 6.375515 -2.926469 -1.049304  
C 5.073121 -3.074028 -1.513668  
C 4.131755 -2.118634 -1.128995  
C 4.481719 -1.051507 -0.299689  
H 7.132719 -3.657831 -1.334264  
H 4.793798 -3.907902 -2.159294  
C 2.253543 -0.594355 -0.637863  
C 1.039996 1.316976 0.334525  
C 2.130254 1.248426 1.416318  
C 3.485148 0.983797 0.790517  
H 4.232755 0.790988 1.569348  
S 2.440380 -2.049043 -1.579887  
N 3.387882 -0.219574 -0.039952  
N 1.106548 0.105032 -0.519869  
C 2.131369 2.459556 2.375157  
C 3.017086 3.623812 1.923932  
C 2.541588 2.004357 3.775935  
H 1.090507 2.819346 2.431536  
H 4.083227 3.355897 1.995068  
H 2.813966 3.944680 0.892298

|   |           |           |           |
|---|-----------|-----------|-----------|
| H | 2.854103  | 4.488838  | 2.583430  |
| H | 1.847841  | 1.246567  | 4.170303  |
| H | 3.553090  | 1.567352  | 3.764501  |
| H | 2.552421  | 2.854447  | 4.473763  |
| H | 1.883869  | 0.358580  | 2.014063  |
| H | 0.081025  | 1.248227  | 0.866143  |
| C | 1.048844  | 2.585734  | -0.493928 |
| C | 0.212841  | 3.642240  | -0.113764 |
| C | 1.899817  | 2.749788  | -1.591536 |
| C | 0.255099  | 4.857954  | -0.793637 |
| H | -0.480991 | 3.505856  | 0.720518  |
| C | 1.940745  | 3.966808  | -2.273707 |
| H | 2.537577  | 1.929796  | -1.931386 |
| C | 1.126779  | 5.025502  | -1.870996 |
| H | -0.400112 | 5.674584  | -0.485772 |
| H | 2.611323  | 4.084850  | -3.126556 |
| H | 1.160689  | 5.976147  | -2.405902 |
| C | -1.250704 | 0.491311  | -1.143916 |
| H | -1.227508 | 1.493419  | -0.727724 |
| C | -2.431287 | -0.027713 | -1.581014 |
| C | -3.556525 | 0.923241  | -1.905780 |
| F | -3.672001 | 0.966825  | -3.251378 |
| F | -4.756621 | 0.586205  | -1.450300 |
| F | -3.315765 | 2.176089  | -1.517248 |
| O | 0.023016  | -1.342861 | -1.905830 |
| C | -0.055449 | -0.326675 | -1.243927 |
| H | 3.836010  | 1.814882  | 0.160208  |
| C | 5.790976  | -0.894880 | 0.162038  |
| H | 6.077445  | -0.056180 | 0.795916  |
| H | 7.756871  | -1.748739 | 0.122079  |
| H | -2.478585 | -0.974887 | -2.122663 |
| C | -6.646709 | -0.818628 | 1.270375  |
| H | -7.105462 | -1.817916 | 1.253616  |
| H | -6.963883 | -0.282554 | 2.172295  |
| H | -6.976756 | -0.269009 | 0.376585  |
| C | -4.645260 | -1.466192 | 0.249406  |
| O | -5.236317 | -0.898409 | 1.322209  |

|   |           |           |           |
|---|-----------|-----------|-----------|
| O | -5.289537 | -2.015512 | -0.617125 |
| C | -2.416974 | -2.549330 | -0.152102 |
| O | -2.675266 | -3.380298 | -1.017110 |
| C | -3.191900 | -1.407340 | 0.296008  |
| N | -2.488452 | -0.752921 | 1.353199  |
| C | -1.274830 | -1.431590 | 1.576400  |
| C | -0.216193 | -1.197603 | 2.470127  |
| C | -1.198524 | -2.522337 | 0.692918  |
| C | 0.875872  | -2.065634 | 2.439789  |
| H | -0.212595 | -0.380770 | 3.185561  |
| C | -0.100852 | -3.378210 | 0.668378  |
| C | 0.948867  | -3.149218 | 1.551855  |
| H | 1.696448  | -1.888935 | 3.139206  |
| H | -0.081679 | -4.201444 | -0.049114 |
| H | 1.825029  | -3.800025 | 1.557137  |
| C | -2.763559 | 0.574711  | 1.689301  |
| O | -3.532413 | 1.234910  | 1.027252  |
| C | -2.121830 | 1.136608  | 2.934958  |
| H | -2.114252 | 0.409827  | 3.756584  |
| H | -1.087444 | 1.456848  | 2.739310  |
| H | -2.701891 | 2.019986  | 3.224369  |

-----  
SMDopt/19\_TS\_SSi

Frequencies, energies and thermodynamic properties:

|                                                  |                  |
|--------------------------------------------------|------------------|
| Lowest Vibrational Mode (1/cm) =                 | -157.5410        |
| 2nd Lowest Vibrational Mode (1/cm) =             | 14.6871          |
| E(RM062X) (a.u.) =                               | -2588.53937820   |
| Thermal correction to Enthalpy (a.u.) =          | 0.662592         |
| Thermal correction to Gibbs Free Energy (a.u.) = | 0.546250         |
| Total Entropy (cal/Kmol) =                       | 244.863          |
| Esp(RM062X+D3) (a.u.) =                          | -2591.14930222   |
| Esp(D3) (a.u.) =                                 | -0.0110493797    |
| Esp(RM062X) (a.u.) =                             | -2591.1382528403 |

Optimised cartesian coordinates (Angstrom):

|   |          |           |           |
|---|----------|-----------|-----------|
| C | 6.727988 | -1.846473 | -0.224208 |
| C | 6.376349 | -2.925648 | -1.048845 |
| C | 5.073985 | -3.073577 | -1.513176 |

|   |           |           |           |
|---|-----------|-----------|-----------|
| C | 4.132441  | -2.118243 | -1.128787 |
| C | 4.482205  | -1.050806 | -0.299790 |
| H | 7.133686  | -3.656959 | -1.333580 |
| H | 4.794818  | -3.907697 | -2.158554 |
| C | 2.253928  | -0.594202 | -0.638072 |
| C | 1.039759  | 1.316800  | 0.334311  |
| C | 2.130313  | 1.248804  | 1.415844  |
| C | 3.485155  | 0.984705  | 0.789703  |
| H | 4.233108  | 0.792549  | 1.568358  |
| S | 2.441048  | -2.049110 | -1.579694 |
| N | 3.388207  | -0.219012 | -0.040301 |
| N | 1.106765  | 0.104935  | -0.520181 |
| C | 2.131140  | 2.459989  | 2.374611  |
| C | 3.016206  | 3.624619  | 1.923077  |
| C | 2.541940  | 2.005051  | 3.775302  |
| H | 1.090132  | 2.819316  | 2.431257  |
| H | 4.082485  | 3.357153  | 1.993818  |
| H | 2.812568  | 3.945415  | 0.891521  |
| H | 2.853103  | 4.489568  | 2.582647  |
| H | 1.848649  | 1.246955  | 4.169886  |
| H | 3.553645  | 1.568521  | 3.763630  |
| H | 2.552554  | 2.855179  | 4.473087  |
| H | 1.884511  | 0.358881  | 2.013713  |
| H | 0.080934  | 1.247397  | 0.866115  |
| C | 1.047651  | 2.585661  | -0.493987 |
| C | 0.211066  | 3.641575  | -0.113451 |
| C | 1.898209  | 2.750405  | -1.591808 |
| C | 0.252367  | 4.857414  | -0.793152 |
| H | -0.482496 | 3.504611  | 0.720964  |
| C | 1.938172  | 3.967551  | -2.273816 |
| H | 2.536365  | 1.930846  | -1.931941 |
| C | 1.123651  | 5.025673  | -1.870723 |
| H | -0.403286 | 5.673579  | -0.484996 |
| H | 2.608430  | 4.086142  | -3.126840 |
| H | 1.156810  | 5.976415  | -2.405503 |
| C | -1.250583 | 0.490563  | -1.144242 |
| H | -1.227556 | 1.492777  | -0.728302 |

C -2.431112 -0.028729 -1.581155  
C -3.556442 0.922033 -1.906175  
F -3.671883 0.965276 -3.251788  
F -4.756515 0.584977 -1.450648  
F -3.315828 2.175000 -1.517946  
O 0.023522 -1.343493 -1.905827  
C -0.055159 -0.327202 -1.244115  
H 3.835379 1.815764 0.159005  
C 5.791432 -0.893811 0.161900  
H 6.077744 -0.054881 0.795546  
H 7.757480 -1.747330 0.122213  
H -2.478337 -0.976074 -2.122516  
C -6.646360 -0.818928 1.270917  
H -7.105054 -1.818248 1.254504  
H -6.963487 -0.282596 2.172700  
H -6.976518 -0.269600 0.376989  
C -4.644959 -1.466699 0.249976  
O -5.235958 -0.898605 1.322650  
O -5.289276 -2.016370 -0.616301  
C -2.416593 -2.549747 -0.151386  
O -2.674873 -3.381041 -1.016088  
C -3.191602 -1.407698 0.296417  
N -2.488131 -0.752851 1.353325  
C -1.274397 -1.431273 1.576605  
C -0.215668 -1.196808 2.470101  
C -1.198045 -2.522302 0.693476  
C 0.876530 -2.064674 2.439893  
H -0.212081 -0.379700 3.185226  
C -0.100238 -3.378008 0.669067  
C 0.949570 -3.148550 1.552315  
H 1.697197 -1.887578 3.139105  
H -0.081035 -4.201478 -0.048153  
H 1.825840 -3.799210 1.557687  
C -2.763372 0.574848 1.689056  
O -3.532257 1.234793 1.026791  
C -2.121819 1.137109 2.934643  
H -2.114068 0.410455 3.756379



H -1.087516 1.457626 2.739015  
H -2.702140 2.020369 3.223901

-----  
SMDopt/19\_TS\_SSj

Frequencies, energies and thermodynamic properties:

Lowest Vibrational Mode (1/cm) = -391.7051  
2nd Lowest Vibrational Mode (1/cm) = 11.4275  
E(RM062X) (a.u.) = -2588.53787619  
Thermal correction to Enthalpy (a.u.) = 0.662568  
Thermal correction to Gibbs Free Energy (a.u.) = 0.547966  
Total Entropy (cal/Kmol) = 241.200  
Esp(RM062X+D3) (a.u.) = -2591.14045797  
Esp(D3) (a.u.) = -0.0106771277  
Esp(RM062X) (a.u.) = -2591.1297808423

Optimised cartesian coordinates (Angstrom):

C -6.703457 2.101553 0.019999  
C -6.325618 3.223978 -0.729698  
C -5.020146 3.365871 -1.191805  
C -4.104228 2.359996 -0.886432  
C -4.481324 1.247944 -0.131125  
H -7.062167 3.995499 -0.957290  
H -4.721056 4.236549 -1.777547  
C -2.270330 0.737975 -0.529863  
C -1.147077 -1.291546 0.238715  
C -2.147071 -1.204026 1.403586  
C -3.525326 -0.843507 0.881461  
H -4.204861 -0.618937 1.713512  
S -2.404806 2.289170 -1.326233  
N -3.412719 0.367667 0.065423  
N -1.174585 -0.024809 -0.527607  
C -2.150749 -2.450680 2.315457  
C -3.128650 -3.548341 1.887528  
C -2.438214 -2.034779 3.758436  
H -1.129223 -2.866727 2.283209  
H -4.170693 -3.228730 2.047612  
H -3.018900 -3.836148 0.832305  
H -2.966350 -4.447638 2.499805

H -1.680146 -1.329983 4.130522  
H -3.423424 -1.547160 3.835340  
H -2.446629 -2.911799 4.422438  
H -1.798619 -0.350537 2.008161  
H -0.145561 -1.346655 0.687128  
C -1.319689 -2.499254 -0.658706  
C -0.528674 -3.629158 -0.418360  
C -2.272902 -2.537181 -1.681404  
C -0.717123 -4.794496 -1.159793  
H 0.245482 -3.584140 0.352694  
C -2.459367 -3.702973 -2.425784  
H -2.876969 -1.655482 -1.910557  
C -1.690154 -4.836361 -2.159857  
H -0.097313 -5.670616 -0.960979  
H -3.208360 -3.723627 -3.219412  
H -1.838911 -5.747434 -2.742111  
C 1.129244 -0.441444 -1.214272  
H 0.983569 -1.501488 -1.030920  
C 2.439993 0.052567 -1.272562  
C 3.456938 -0.835580 -1.932370  
F 3.271084 -0.844328 -3.263184  
F 4.715060 -0.452984 -1.731307  
F 3.361334 -2.112633 -1.532648  
O 0.036148 1.641908 -1.522340  
C 0.053596 0.479234 -1.132796  
H -3.970491 -1.643264 0.270708  
C -5.790392 1.097835 0.330436  
H -6.093658 0.224171 0.907016  
H -7.733168 2.007210 0.367345  
H 2.561365 1.095475 -1.584729  
C 4.538664 -2.937545 1.206110  
H 4.017522 -3.480993 0.406901  
H 5.614977 -3.131770 1.153277  
H 4.145949 -3.264818 2.178633  
C 3.127988 -1.084078 1.038722  
O 4.381127 -1.534364 1.044492  
O 2.167618 -1.808487 1.206178

|   |           |           |           |
|---|-----------|-----------|-----------|
| C | 4.195852  | 1.277216  | 0.520270  |
| O | 5.382823  | 1.053200  | 0.439768  |
| C | 3.042980  | 0.337493  | 0.674248  |
| N | 1.921159  | 1.134317  | 1.085057  |
| C | 2.185352  | 2.474274  | 0.723072  |
| C | 1.337180  | 3.583411  | 0.690742  |
| C | 3.544765  | 2.609711  | 0.412968  |
| C | 1.904178  | 4.815025  | 0.354741  |
| H | 0.276541  | 3.484142  | 0.899710  |
| C | 4.100765  | 3.840800  | 0.081215  |
| C | 3.265362  | 4.956146  | 0.052168  |
| H | 1.257500  | 5.694178  | 0.318210  |
| H | 5.165578  | 3.913751  | -0.149343 |
| H | 3.663703  | 5.936551  | -0.212718 |
| C | 0.859873  | 0.840060  | 1.946425  |
| O | -0.176387 | 1.470840  | 1.855110  |
| C | 1.055189  | -0.138951 | 3.077917  |
| H | 0.553049  | -1.090969 | 2.860143  |
| H | 2.108190  | -0.337328 | 3.302419  |
| H | 0.570474  | 0.319363  | 3.950385  |

-----  
SMDopt/19\_TS\_SSk

Frequencies, energies and thermodynamic properties:

|                                                  |                  |
|--------------------------------------------------|------------------|
| Lowest Vibrational Mode (1/cm) =                 | -221.4147        |
| 2nd Lowest Vibrational Mode (1/cm) =             | 14.5245          |
| E(RM062X) (a.u.) =                               | -2588.53422864   |
| Thermal correction to Enthalpy (a.u.) =          | 0.662438         |
| Thermal correction to Gibbs Free Energy (a.u.) = | 0.547073         |
| Total Entropy (cal/Kmol) =                       | 242.808          |
| Esp(RM062X+D3) (a.u.) =                          | -2591.13808216   |
| Esp(D3) (a.u.) =                                 | -0.0108528397    |
| Esp(RM062X) (a.u.) =                             | -2591.1272293203 |

Optimised cartesian coordinates (Angstrom):

|   |          |           |           |
|---|----------|-----------|-----------|
| C | 6.904004 | -1.682297 | -0.275388 |
| C | 6.564281 | -2.850670 | -0.973159 |
| C | 5.249534 | -3.096079 | -1.355162 |
| C | 4.283635 | -2.148050 | -1.016828 |

|   |           |           |           |
|---|-----------|-----------|-----------|
| C | 4.622639  | -0.990836 | -0.313447 |
| H | 7.340141  | -3.574973 | -1.223997 |
| H | 4.979917  | -4.000245 | -1.903212 |
| C | 2.362038  | -0.654821 | -0.586263 |
| C | 1.102438  | 1.271191  | 0.289909  |
| C | 2.239545  | 1.327453  | 1.322984  |
| C | 3.579119  | 1.081452  | 0.657347  |
| H | 4.368250  | 0.980766  | 1.412464  |
| S | 2.570138  | -2.191754 | -1.387261 |
| N | 3.505562  | -0.182811 | -0.078874 |
| N | 1.194079  | 0.004129  | -0.479485 |
| C | 2.224574  | 2.600472  | 2.198030  |
| C | 3.032722  | 3.769254  | 1.628185  |
| C | 2.718801  | 2.263547  | 3.605171  |
| H | 1.171490  | 2.916077  | 2.280135  |
| H | 4.112593  | 3.554264  | 1.664150  |
| H | 2.767541  | 4.009681  | 0.588831  |
| H | 2.859448  | 4.669412  | 2.236117  |
| H | 2.079730  | 1.506593  | 4.083836  |
| H | 3.748184  | 1.871319  | 3.575148  |
| H | 2.721393  | 3.160585  | 4.241753  |
| H | 2.060059  | 0.471037  | 1.990723  |
| H | 0.171923  | 1.201718  | 0.870919  |
| C | 1.015118  | 2.478569  | -0.621611 |
| C | 0.144109  | 3.516445  | -0.267758 |
| C | 1.804054  | 2.610579  | -1.768684 |
| C | 0.093480  | 4.685690  | -1.024492 |
| H | -0.503440 | 3.397026  | 0.605477  |
| C | 1.750897  | 3.780467  | -2.528270 |
| H | 2.465965  | 1.799820  | -2.084148 |
| C | 0.904294  | 4.823606  | -2.152603 |
| H | -0.586977 | 5.489092  | -0.736998 |
| H | 2.373410  | 3.874130  | -3.419790 |
| H | 0.865294  | 5.737862  | -2.747358 |
| C | -1.190044 | 0.234981  | -1.046346 |
| H | -1.210303 | 1.236136  | -0.626080 |
| C | -2.365191 | -0.338406 | -1.473822 |

C -3.483513 0.612315 -1.785840  
F -3.184284 1.357831 -2.862109  
F -4.639532 0.009015 -2.067684  
F -3.709237 1.473895 -0.785143  
O 0.133369 -1.600504 -1.706184  
C 0.022903 -0.533701 -1.126683  
H 3.860180 1.880906 -0.044439  
C 5.943269 -0.735391 0.063527  
H 6.219531 0.173764 0.597103  
H 7.942895 -1.507024 0.006955  
H -2.368911 -1.265210 -2.052926  
C -6.800602 -0.403666 0.271682  
H -7.317263 -1.283139 0.680339  
H -7.207895 0.509230 0.721666  
H -6.944205 -0.381735 -0.817595  
C -4.714093 -1.462333 0.117843  
O -5.421422 -0.425160 0.593873  
O -5.243240 -2.354697 -0.502457  
C -2.468331 -2.582169 0.123991  
O -2.693178 -3.511225 -0.638039  
C -3.273885 -1.375083 0.375816  
N -2.598379 -0.589103 1.390423  
C -1.363141 -1.213638 1.656755  
C -0.337434 -0.850383 2.551686  
C -1.268788 -2.421292 0.959331  
C 0.747979 -1.709948 2.683268  
H -0.376701 0.071141 3.127674  
C -0.164805 -3.266364 1.081425  
C 0.856345 -2.906140 1.948621  
H 1.544145 -1.440130 3.381109  
H -0.127095 -4.185212 0.492737  
H 1.735856 -3.540666 2.069244  
C -2.784273 0.739233 1.833134  
O -1.809434 1.446882 1.999889  
C -4.139266 1.247518 2.248874  
H -4.677838 1.660705 1.389158  
H -4.754924 0.460573 2.692796

H -3.949192 2.050991 2.970387

-----

SMDopt/19\_TS\_SSI

Frequencies, energies and thermodynamic properties:

Lowest Vibrational Mode (1/cm) = -358.0496  
2nd Lowest Vibrational Mode (1/cm) = 18.0660  
E(RM062X) (a.u.) = -2588.53276707  
Thermal correction to Enthalpy (a.u.) = 0.662452  
Thermal correction to Gibbs Free Energy (a.u.) = 0.547207  
Total Entropy (cal/Kmol) = 242.553  
Esp(RM062X+D3) (a.u.) = -2591.13658366  
Esp(D3) (a.u.) = -0.0106420523  
Esp(RM062X) (a.u.) = -2591.1259416077

Optimised cartesian coordinates (Angstrom):

C 6.746862 -2.201380 -0.015583  
C 6.352748 -3.326302 -0.753208  
C 5.036677 -3.473014 -1.182461  
C 4.127478 -2.467765 -0.856542  
C 4.520602 -1.353185 -0.113024  
H 7.085251 -4.096425 -0.997791  
H 4.725027 -4.345459 -1.758717  
C 2.303547 -0.842890 -0.463591  
C 1.215827 1.216441 0.282624  
C 2.217110 1.126700 1.445382  
C 3.589170 0.734758 0.928539  
H 4.262052 0.492952 1.761475  
S 2.417716 -2.400135 -1.252323  
N 3.456585 -0.472573 0.107758  
N 1.206376 -0.079167 -0.440338  
C 2.240824 2.386190 2.340163  
C 3.254341 3.450004 1.911300  
C 2.488916 1.982973 3.793965  
H 1.232115 2.827878 2.284592  
H 4.285386 3.106052 2.091031  
H 3.166281 3.724156 0.850176  
H 3.106641 4.362623 2.507268  
H 1.698045 1.311277 4.158558

|   |           |           |           |
|---|-----------|-----------|-----------|
| H | 3.455269  | 1.463396  | 3.897164  |
| H | 2.513690  | 2.869045  | 4.445368  |
| H | 1.853497  | 0.292776  | 2.067209  |
| H | 0.218097  | 1.313987  | 0.733227  |
| C | 1.438885  | 2.389071  | -0.649436 |
| C | 0.688239  | 3.553241  | -0.443775 |
| C | 2.396610  | 2.364136  | -1.668494 |
| C | 0.923364  | 4.690219  | -1.215576 |
| H | -0.093329 | 3.552237  | 0.320671  |
| C | 2.628970  | 3.501672  | -2.443232 |
| H | 2.969063  | 1.455699  | -1.873594 |
| C | 1.901365  | 4.669387  | -2.211492 |
| H | 0.335279  | 5.593622  | -1.044060 |
| H | 3.381088  | 3.472784  | -3.233642 |
| H | 2.086380  | 5.558333  | -2.817118 |
| C | -1.048608 | 0.409492  | -1.221708 |
| H | -0.827725 | 1.466651  | -1.112415 |
| C | -2.381794 | 0.013847  | -1.299595 |
| C | -3.331081 | 0.962265  | -1.972617 |
| F | -3.097825 | 0.998826  | -3.296047 |
| F | -4.609088 | 0.622372  | -1.826509 |
| F | -3.199038 | 2.221787  | -1.534291 |
| O | -0.066339 | -1.755771 | -1.335967 |
| C | -0.031754 | -0.565862 | -1.040838 |
| H | 4.054018  | 1.524709  | 0.319947  |
| C | 5.839936  | -1.198931 | 0.315788  |
| H | 6.154444  | -0.322601 | 0.882160  |
| H | 7.784855  | -2.104208 | 0.305227  |
| H | -2.598762 | -1.031791 | -1.540031 |
| C | -4.058489 | 3.280725  | 1.309796  |
| H | -3.571071 | 3.739122  | 0.438200  |
| H | -5.103649 | 3.603708  | 1.366830  |
| H | -3.522751 | 3.587431  | 2.219127  |
| C | -2.894696 | 1.270974  | 1.059529  |
| O | -4.085435 | 1.868400  | 1.187239  |
| O | -1.856884 | 1.894092  | 1.103742  |
| C | -4.344785 | -0.863017 | 0.587593  |

O -5.481109 -0.440228 0.543281  
C -3.044788 -0.154718 0.715487  
N -2.057582 -1.145760 1.059905  
C -2.577301 -2.413565 0.686978  
C -1.961172 -3.658445 0.519889  
C -3.950029 -2.287632 0.433587  
C -2.760623 -4.740561 0.142069  
H -0.894365 -3.812284 0.642285  
C -4.741697 -3.368176 0.062014  
C -4.136813 -4.614936 -0.079218  
H -2.283264 -5.712794 0.005158  
H -5.808036 -3.219638 -0.120155  
H -4.722669 -5.485629 -0.376816  
C -1.050672 -0.963986 2.015093  
O -1.041959 -0.005983 2.754623  
C 0.019373 -2.025145 2.087173  
H -0.381875 -2.934659 2.557887  
H 0.401911 -2.293273 1.093395  
H 0.826087 -1.641463 2.722075

-----

## References

1. L. C. Morrill, J. Douglas, T. Lebl, A. M. Z. Slawin, D. J. Fox and A. D. Smith, *Chemical Science*, 2013, **4**, 4146-4155.
2. *Pure and Applied Chemistry*, 1974, **37**, 445-462.
3. W. C. Still, M. Kahn and A. Mitra, *The Journal of Organic Chemistry*, 1978, **43**, 2923-2925.
4. G. R. Fulmer, A. J. M. Miller, N. H. Sherden, H. E. Gottlieb, A. Nudelman, B. M. Stoltz, J. E. Bercaw and K. I. Goldberg, *Organometallics*, 2010, **29**, 2176-2179.
5. H. E. Gottlieb, V. Kotlyar and A. Nudelman, *The Journal of Organic Chemistry*, 1997, **62**, 7512-7515.
6. R. K. Harris, E. D. Becker, S. M. Cabral de Menezes, P. Granger, R. E. Hoffman and K. W. Zilm, *Pure and Applied Chemistry*, 2008, **80**, 59-84.
7. R. K. Harris, E. D. Becker, S. M. Cabral de Menezes, R. Goodfellow and P. Granger, *Pure and Applied Chemistry*, 2001, **73**, 1795-1818.
8. *Pure and Applied Chemistry*, 1976, **45**, 217-220.
9. *Pure and Applied Chemistry*, 1972, **29**, 625-628.
10. R. K. Harris, J. Kowalewski and S. M. Cabral de Menezes, *Pure and Applied Chemistry*, 1997, **69**, 2489-2496.
11. K. K. Murray, R. K. Boyd, M. N. Eberlin, G. J. Langley, L. Li and Y. Naito, *Pure and Applied Chemistry*, 2013, **85**, 1515-1609.



12. J. F. J. Todd, *Pure and Applied Chemistry*, 1991, **63**, 1541-1566.
13. H. A. Favre and W. H. Powell, *Nomenclature of Organic Chemistry: IUPAC Recommendations and Preferred Names 2013*, Royal Society of Chemistry, Cambridge, UK, 2014.
14. M. A. Brimble, D. S. Black, R. Hartshorn, A. P. Rauter, C.-K. Sha and L. K. Sydnes, *Pure and Applied Chemistry*, 2013, **85**, 307-313.
15. W. Mormann and K.-H. Hellwich, *Pure and Applied Chemistry*, 2008, **80**, 201-232.
16. J. Brecher, *Pure and Applied Chemistry*, 2008, **80**, 277-410.
17. J. Brecher, *Pure and Applied Chemistry*, 2006, **78**, 1897-1970.
18. G. P. Moss, *Pure and Applied Chemistry*, 1999, **71**, 531-558.
19. H. A. Favre, K.-H. Hellwich, G. P. Moss, W. H. Powell and J. G. Trynham, *Pure and Applied Chemistry*, 1999, **71**, 1327-1330.
20. G. P. Moss, *Pure and Applied Chemistry*, 1998, **70**, 143-216.
21. G. P. Moss, *Pure and Applied Chemistry*, 1996, **68**, 2193-2222.
22. W. H. Powell, *Pure and Applied Chemistry*, 1993, **65**, 1357-1455.
23. W. Drenth, *Pure and Applied Chemistry*, 1992, **64**, 989-990.
24. G. P. Moss, *Pure and Applied Chemistry*, 1989, **61**, 1783-1822.
25. J. S. Littler, *Pure and Applied Chemistry*, 1989, **61**, 57-81.
26. R. A. Y. Jones and J. F. Bunnett, *Pure and Applied Chemistry*, 1989, **61**, 725-768.
27. R. D. Guthrie, *Pure and Applied Chemistry*, 1989, **61**, 23-56.
28. W. H. Powell, *Pure and Applied Chemistry*, 1988, **60**, 1395-1401.
29. J. F. Bunnett and R. A. Y. Jones, *Pure and Applied Chemistry*, 1988, **60**, 1115-1116.
30. G. P. Moss, *Pure and Applied Chemistry*, 1987, **59**, 779-832.
31. N. Lozac'h, *Pure and Applied Chemistry*, 1986, **58**, 1693-1696.
32. W. H. Powell, *Pure and Applied Chemistry*, 1984, **56**, 769-778.
33. *Pure and Applied Chemistry*, 1984, **56**, 595-624.
34. W. H. Powell, *Pure and Applied Chemistry*, 1983, **55**, 409-416.
35. J. E. Merritt and K. L. Loening, *Pure and Applied Chemistry*, 1983, **51**, 2251-2304.
36. N. Lozac'h, *Pure and Applied Chemistry*, 1983, **55**, 1463-1466.
37. W. H. Powell, *Pure and Applied Chemistry*, 1982, **54**, 217-228.
38. *Pure and Applied Chemistry*, 1982, **54**, 211-216.
39. *Pure and Applied Chemistry*, 1982, **54**, 207-210.
40. J. F. Bunnett, *Pure and Applied Chemistry*, 1981, **53**, 305-322.
41. *Pure and Applied Chemistry*, 1981, **53**, 1901-1905.
42. *Pure and Applied Chemistry*, 1979, **51**, 1995-2003.
43. *Pure and Applied Chemistry*, 1979, **51**, 353-380.
44. L. C. Cross and W. Klyne, *Pure and Applied Chemistry*, 1976, **45**, 11-30.
45. *Pure and Applied Chemistry*, 1974, **40**, 315-332.
46. *Pure and Applied Chemistry*, 1972, **31**, 283-322.
47. *Pure and Applied Chemistry*, 1972, **31**, 639-646.
48. *Pure and Applied Chemistry*, 1971, **28**, 1-110.
49. *Pure and Applied Chemistry*, 1965, **11**, 1-260.
50. H. Liu, A. M. Z. Slawin and A. D. Smith, *Organic Letters*, 2020, **22**, 1301-1305.
51. J. Bitai, A. J. Nimmo, A. M. Z. Slawin and A. D. Smith, *Angewandte Chemie International Edition*, 2022, **61**, e202202621.
52. J. E. Lapetaje, C. M. Young, C. Shu and A. D. Smith, *Chemical Communications*, 2022, **58**, 6886-6889.
53. H.-L. Liu, X.-T. Li, H.-Z. Tian and X.-W. Sun, *Organic Letters*, 2021, **23**, 4579-4583.
54. Y.-N. Duan, L.-Q. Cui, L.-H. Zuo and C. Zhang, *Chemistry – A European Journal*, 2015, **21**, 13052-13057.
55. L. Zhao, G. Huang, B. Guo, L. Xu, J. Chen, W. Cao, G. Zhao and X. Wu, *Organic Letters*, 2014, **16**, 5584-5587.

56. *CrystalClear-SM Expert v2.1.*, Rigaku Americas, *The Woodlands, Texas, USA*, and Rigaku Corporation, *Tokyo, Japan*, 2015.
57. *CrysAlisPro v1.171.42.49, v1.171.42.82a, v1.171.42.93a*, Rigaku Oxford Diffraction, Rigaku Corporation, *Oxford, U.K.*, 2020-2023.
58. M. C. Burla, R. Caliandro, M. Camalli, B. Carrozzini, G. L. Cascarano, C. Giacovazzo, M. Mallamo, A. Mazzone, G. Polidori and R. Spagna, *Journal of Applied Crystallography*, 2012, **45**, 357-361.
59. G. Sheldrick, *Acta Crystallographica Section A*, 2015, **71**, 3-8.
60. G. Sheldrick, *Acta Crystallographica Section C*, 2015, **71**, 3-8.
61. O. V. Dolomanov, L. J. Bourhis, R. J. Gildea, J. A. K. Howard and H. Puschmann, *Journal of Applied Crystallography*, 2009, **42**, 339-341.
62. J. Wu, C. M. Young, A. A. Watts, A. M. Z. Slawin, G. R. Boyce, M. Bühl and A. D. Smith, *Organic Letters*, 2022, **24**, 4040-4045.
63. C. Wang, S.-J. Li, Q.-C. Zhang, D. Wei and L. Ding, *Catalysis Science & Technology*, 2020, **10**, 3664-3669.
64. Y. Zhao and D. G. Truhlar, *Theoretical Chemistry Accounts*, 2008, **120**, 215-241.
65. A. Schäfer, H. Horn and R. Ahlrichs, *The Journal of Chemical Physics*, 1992, **97**, 2571-2577.
66. A. Schäfer, C. Huber and R. Ahlrichs, *The Journal of Chemical Physics*, 1994, **100**, 5829-5835.
67. F. Weigend and R. Ahlrichs, *Physical Chemistry Chemical Physics*, 2005, **7**, 3297-3305.
68. F. Weigend, *Physical Chemistry Chemical Physics*, 2006, **8**, 1057-1065.
69. A. V. Marenich, C. J. Cramer and D. G. Truhlar, *The Journal of Physical Chemistry B*, 2009, **113**, 6378-6396.
70. B. Mennucci and J. Tomasi, *The Journal of Chemical Physics*, 1997, **106**, 5151-5158.
71. J. Tomasi, B. Mennucci and E. Cancès, *Journal of Molecular Structure: THEOCHEM*, 1999, **464**, 211-226.
72. M. J. Frisch, G. W. Trucks, H. B. Schlegel, G. E. Scuseria, M. A. Robb, J. R. Cheeseman, G. Scalmani, V. Barone, G. A. Petersson, H. Nakatsuji, X. Li, M. Caricato, A. V. Marenich, J. Bloino, B. G. Janesko, R. Gomperts, B. Mennucci, H. P. Hratchian, J. V. Ortiz, A. F. Izmaylov, J. L. Sonnenberg, Williams, F. Ding, F. Lipparini, F. Egidi, J. Goings, B. Peng, A. Petrone, T. Henderson, D. Ranasinghe, V. G. Zakrzewski, J. Gao, N. Rega, G. Zheng, W. Liang, M. Hada, M. Ehara, K. Toyota, R. Fukuda, J. Hasegawa, M. Ishida, T. Nakajima, Y. Honda, O. Kitao, H. Nakai, T. Vreven, K. Throssell, J. A. Montgomery Jr., J. E. Peralta, F. Ogliaro, M. J. Bearpark, J. J. Heyd, E. N. Brothers, K. N. Kudin, V. N. Staroverov, T. A. Keith, R. Kobayashi, J. Normand, K. Raghavachari, A. P. Rendell, J. C. Burant, S. S. Iyengar, J. Tomasi, M. Cossi, J. M. Millam, M. Klene, C. Adamo, R. Cammi, J. W. Ochterski, R. L. Martin, K. Morokuma, O. Farkas, J. B. Foresman and D. J. Fox, *Gaussian 16 Rev. C.01* Wallingford, CT, 2016.
73. C. Y. Legault, *CYLview20 Build 0001*, Sherbrooke, Canada, 2020.
74. R. A. Boto, F. Peccati, R. Laplaza, C. Quan, A. Carbone, J.-P. Piquemal, Y. Maday and J. Contreras-García, *Journal of Chemical Theory and Computation*, 2020, **16**, 4150-4158.
75. W. Humphrey, A. Dalke and K. Schulten, *Journal of Molecular Graphics*, 1996, **14**, 33-38.
76. M. C. Rezende and M. Domínguez, *Journal of Molecular Modeling*, 2015, **21**, 212.
